# Supplementary material
Source: Preprints.org preprint supplement (doi:10.20944/preprints202004.0431.v3)
Supplement: Supplementary file 1 [file Enrichr.xlsx]

## Sheet: Virus-Host PPI P-HIPSTer 2020
Term	Overlap	P-value	Adjusted P-value	Old P-value	Old Adjusted P-value	Odds Ratio	Combined Score	Genes
Molluscum contagiosum virus subtype 1 MC080R (gene: MC080R)	15/434	2.27049e-07	0.00152464	0	0	5.15854	78.9158	RPL4;HSPA8;HSP90AB1;RPS8;ACTB;ACTG1;RPS4X;UBC;ALB;RACK1;MYH9;PABPC1;RPS2;B2M;RPL19
Human coronavirus 229E full_polyprotein 1..4085	8/107	6.14623e-07	0.0020636	0	0	11.1592	159.601	HSPA8;HSP90AB1;UBB;UBC;MYH9;FAU;RPS27A;B2M
SARS coronavirus excised_polyprotein 1..4369 (gene: orf1ab)	10/194	7.5226e-07	0.00168381	0	0	7.69349	108.48	HSPA8;HSP90AB1;UBB;UBC;MYH9;RPL13;PABPC1;FAU;RPS27A;B2M
Human coronavirus 229E full_polyprotein 1..6758	8/112	8.71845e-07	0.00146361	0	0	10.661	148.749	HSPA8;HSP90AB1;UBB;UBC;MYH9;FAU;RPS27A;B2M
Monkeypox virus cowpox A-type inclusion protein	12/301	8.90905e-07	0.00119649	0	0	5.95031	82.894	FGB;HSPA8;FGA;FTH1;UBC;ALB;FGG;RPS3;APOA1;RPL13;RPL23A;RPS27A
SARS coronavirus P2 full_polyprotein 1..4382	10/198	9.06346e-07	0.00101435	0	0	7.53807	104.883	HSPA8;HSP90AB1;UBB;UBC;MYH9;RPL13;PABPC1;FAU;RPS27A;B2M
Omsk hemorrhagic fever virus full_polyprotein 1..3414	7/85	1.65443e-06	0.00158707	0	0	12.2915	163.625	HSPA8;HSP90AB1;AMBP;UBC;RPL13;RPS2;B2M
Human coronavirus NL63 full_polyprotein 1..6729	8/138	4.20577e-06	0.00353022	0	0	8.65239	107.108	HSPA8;HSP90AB1;UBB;UBC;MYH9;FAU;RPS27A;B2M
Human group 1 coronavirus associated with pneumonia ORF 1ab	7/103	6.0099e-06	0.00448405	0	0	10.1435	121.946	HSPA8;HSP90AB1;UBB;UBC;MYH9;RPS27A;B2M
Human group 1 coronavirus associated with pneumonia ORF 1a	7/106	7.27004e-06	0.00488183	0	0	9.85638	116.618	HSPA8;HSP90AB1;UBB;UBC;MYH9;RPS27A;B2M
Dengue virus 1 membrane glycoprotein M (gene: flavivirus polyprotein)	43942	1.05537e-05	0.00644254	0	0	28.4293	325.772	HSPA8;UBC;B2M;ACTB
Yaba-like disease virus 34L protein (gene: 34L)	6/76	1.20308e-05	0.00673221	0	0	11.7832	133.48	HSPA8;HSP90AB1;RPS18;RPS5;UBC;RPS3
Human betacoronavirus 2c Jordan-N3/2012 ORF1ab protein (gene: ORF1ab)	6/80	1.61787e-05	0.00835694	0	0	11.194	123.49	FGB;HSPA8;UBB;UBC;MYH9;B2M
Betacoronavirus England 1 ORF1b protein (gene: orf1ab)	6/81	1.73777e-05	0.0083351	0	0	11.0558	121.175	FGB;HSPA8;UBB;UBC;MYH9;B2M
Japanese encephalitis virus hypothetical protein	6/82	1.86474e-05	0.0083478	0	0	10.921	118.928	HSPA8;HSP90AB1;AMBP;UBC;PABPC1;B2M
Human betacoronavirus 2c England-Qatar/2012 ORF1ab	6/82	1.86474e-05	0.00782606	0	0	10.921	118.928	FGB;HSPA8;UBB;UBC;MYH9;B2M
Karshi virus (Royal Farm virus) full_polyprotein 1..3416	6/85	2.29116e-05	0.00905008	0	0	10.5356	112.56	HSPA8;HSP90AB1;AMBP;UBC;RPL13;B2M
West Nile virus lineage 2 excised_polyprotein 1..2273 (gene: flavivirus polyprotein)	7/127	2.37277e-05	0.00885176	0	0	8.22658	87.6038	HSPA8;HSP90AB1;AMBP;UBC;RPL13;B2M;ACTB
Dengue virus 3 membrane glycoprotein M (gene: flavivirus polyprotein)	43948	2.99972e-05	0.0106016	0	0	22.1117	230.28	HSPA8;UBC;B2M;ACTB
Human betacoronavirus 2c Jordan-N3/2012 ORF1a protein (gene: ORF1ab)	6/91	3.37924e-05	0.0113458	0	0	9.84091	101.315	FGB;HSPA8;UBB;UBC;MYH9;B2M
Human betacoronavirus 2c EMC/2012 ORF1a (gene: orf1ab)	6/92	3.59529e-05	0.0114964	0	0	9.73394	99.6103	FGB;HSPA8;UBB;UBC;MYH9;B2M
Betacoronavirus England 1 ORF1a protein (gene: orf1ab)	6/95	4.31079e-05	0.0131577	0	0	9.42655	94.7539	FGB;HSPA8;UBB;UBC;MYH9;B2M
Human betacoronavirus 2c England-Qatar/2012 ORF1a	6/95	4.31079e-05	0.0125856	0	0	9.42655	94.7539	FGB;HSPA8;UBB;UBC;MYH9;B2M
Influenza A virus (A/California/04/2009(H1N1)) matrix protein 2 (gene: M2)	43951	4.6118e-05	0.0129034	0	0	19.9005	198.693	UBC;APOE;ACTB;ACTG1
Molluscum contagiosum virus subtype 1 MC049L (gene: MC049L)	5/62	5.96686e-05	0.016027	0	0	12.0366	117.076	HSP90AB1;UBB;UBC;RPS27A;B2M
Human betaherpesvirus 5 membrane glycoprotein UL18 (gene: UL18)	9/259	6.36317e-05	0.0164341	0	0	5.18642	50.1133	RPL4;HSPA8;HSP90AB1;UBC;RACK1;B2M;ACTB;ACTG1;RPL19
Human immunodeficiency virus envelope glycoprotein (gene: env)	9/260	6.55442e-05	0.0163011	0	0	5.16648	49.7675	FGB;UBB;UBC;ALB;FGG;RPL13;B2M;ACTB;ACTG1
Wesselsbron virus full_polyprotein 1..3405	6/103	6.7888e-05	0.016281	0	0	8.69439	83.4457	HSPA8;HSP90AB1;AMBP;UBC;RPL13;B2M
Dengue virus 2 membrane glycoprotein precursor M (gene: flavivirus polyprotein)	4/34	7.64403e-05	0.0176999	0	0	17.5593	166.444	HSPA8;UBC;APOE;ACTB
Human alphaherpesvirus 2 large tegument protein (gene: UL36)	6/107	8.39535e-05	0.0187916	0	0	8.36937	78.5486	HSPA8;FGA;UBB;UBC;RPL13;RPS27A
SARS coronavirus nsp7-pp1a/pp1ab (gene: orf1ab)	4/36	9.60899e-05	0.0208143	0	0	16.5837	153.403	HSPA8;UBB;UBC;B2M
West Nile virus lineage 2 excised_polyprotein 1..791 (gene: flavivirus polyprotein)	6/110	9.78814e-05	0.0205398	0	0	8.14111	75.1568	HSPA8;HSP90AB1;UBC;RPL13;B2M;ACTB
Human parainfluenza virus 2 P protein (gene: V)	4/38	0.00011917	0.0242494	0	0	15.7109	141.947	FGB;HSPA8;UBC;ALB
Coxsackievirus A17 VP4	43905	0.000126146	0.0249138	0	0	29.8507	268.002	UBC;B2M;ACTB
Echovirus E17 VP4	43905	0.000126146	0.0242019	0	0	29.8507	268.002	UBC;B2M;ACTB
Echovirus E21 VP4	43905	0.000126146	0.0235297	0	0	29.8507	268.002	UBC;B2M;ACTB
Orf virus ORF035 virion core protease	4/40	0.000146023	0.0265012	0	0	14.9254	131.817	UBB;UBC;RPS27A;B2M
Monkeypox virus Zaire-96-I-16 A27L (gene: A27L)	43906	0.000154496	0.0273011	0	0	27.9851	245.579	FGB;FGG;RPL13
Enterovirus B97 VP4	43906	0.000154496	0.0266011	0	0	27.9851	245.579	UBC;B2M;ACTB
Human enterovirus C104 VP4	43906	0.000154496	0.0259361	0	0	27.9851	245.579	UBC;B2M;ACTB
Human enterovirus C117 VP4	43906	0.000154496	0.0253035	0	0	27.9851	245.579	UBC;B2M;ACTB
Human alphaherpesvirus 1 tegument protein VP22 (gene: UL49)	6/121	0.000165409	0.0264458	0	0	7.40101	64.4412	HSPA8;UBB;UBC;RPS27A;ACTB;ACTG1
Papiine alphaherpesvirus 2 ribonucleotide reductase subunit 2 (gene: UL40)	4/42	0.000176999	0.0276407	0	0	14.2146	122.805	HSPA8;FTH1;UBC;ALB
Echovirus 9 strain Barty VP4	43907	0.000186685	0.0284906	0	0	26.3389	226.148	UBC;B2M;ACTB
Echovirus E14 VP4	43907	0.000186685	0.0278575	0	0	26.3389	226.148	UBC;B2M;ACTB
Echovirus E20 VP4	43907	0.000186685	0.0272519	0	0	26.3389	226.148	UBC;B2M;ACTB
Echovirus E29 VP4	43907	0.000186685	0.0266721	0	0	26.3389	226.148	UBC;B2M;ACTB
Middle East respiratory syndrome-related coronavirus nsp7 protein (gene: orf1ab)	4/44	0.000212457	0.0297218	0	0	13.5685	114.746	FGB;HSPA8;UBB;UBC
Molluscum contagiosum virus subtype 1 MC098R (gene: MC098R)	4/44	0.000212457	0.0291153	0	0	13.5685	114.746	HSP90AB1;UBC;MYH9;B2M
Echovirus E12 polyprotein region 2	43908	0.000222926	0.0299389	0	0	24.8756	209.171	UBC;B2M;ACTB
Louping ill virus envelope protein	5/82	0.000226075	0.0297666	0	0	9.10084	76.3983	HSPA8;HSP90AB1;UBC;RPL13;B2M
Human respirovirus 3 phosphoprotein	5/82	0.000226075	0.0291942	0	0	9.10084	76.3983	FGB;HSPA8;MT-CO1;FTH1;UBC
Echovirus E19 VP4	43909	0.00026343	0.0333761	0	0	23.5664	194.228	UBC;B2M;ACTB
Echovirus E24 VP4	43909	0.00026343	0.032758	0	0	23.5664	194.228	UBC;B2M;ACTB
Echovirus E33 VP4	43909	0.00026343	0.0321624	0	0	23.5664	194.228	UBC;B2M;ACTB
Echovirus E6 VP4	43909	0.00026343	0.0315881	0	0	23.5664	194.228	UBC;B2M;ACTB
Enterovirus B 1A(VP4)	43909	0.00026343	0.0310339	0	0	23.5664	194.228	UBC;B2M;ACTB
SARS coronavirus 3C-like proteinase (gene: orf1ab)	43909	0.00026343	0.0304988	0	0	23.5664	194.228	UBB;UBC;PABPC1
Kyasanur Forest disease virus E	4/47	0.00027485	0.0312816	0	0	12.7024	104.151	HSPA8;HSP90AB1;RPL13;B2M
Human betacoronavirus 2c EMC/2012 ORF1ab (gene: orf1ab)	4/47	0.00027485	0.0307603	0	0	12.7024	104.151	FGB;HSPA8;UBB;UBC
Hepatitis C virus subtype 3i full_polyprotein 1..3021	4/49	0.000323128	0.0355706	0	0	12.184	97.9283	HSPA8;HSP90AB1;PABPC1;B2M
Alkhumra hemorrhagic fever virus envelope protein	4/51	0.000377197	0.0408528	0	0	11.7062	92.2768	HSPA8;HSP90AB1;RPL13;B2M
Powassan virus envelope protein	4/51	0.000377197	0.0402044	0	0	11.7062	92.2768	HSPA8;HSP90AB1;RPL13;B2M
Saint Louis encephalitis virus full_polyprotein 1..3430	5/92	0.000386284	0.0405296	0	0	8.11162	63.7487	HSPA8;HSP90AB1;AMBP;UBC;B2M
Ectromelia virus ERPV hemagglutinin	8/262	0.000392238	0.0405212	0	0	4.55737	35.7464	UBB;UBC;MYH9;RPL13;MT-CO2;MT-CO3;RPS27A;B2M
Influenza B virus (B/Memphis/12/97) HA protein	5/93	0.00040606	0.0413135	0	0	8.02439	62.6626	FGA;HSPA8;FTH1;UBC;ACTB
Variola virus serine protease inhibitor-like protein (gene: C2L)	4/52	0.000406523	0.0407433	0	0	11.4811	89.6426	HSPA8;HSP90AB1;UBC;B2M
Hendra henipavirus phosphoprotein P (gene: P/V/C)	10/405	0.00040726	0.0402169	0	0	3.68528	28.7675	FGB;HSPA8;FGA;FTH1;UBC;APOA1;RPL13;PABPC1;ACTB;S100A8
Dengue virus 2 membrane glycoprotein M (gene: flavivirus polyprotein)	43912	0.000412551	0.040149	0	0	20.3528	158.612	HSPA8;UBC;ACTB
Dengue virus 1 envelope protein E (gene: flavivirus polyprotein)	4/53	0.000437442	0.0419632	0	0	11.2644	87.1255	HSPA8;HSP90AB1;UBC;B2M
Human parechovirus 3 full_polyprotein 1..2177	4/54	0.000470002	0.0444516	0	0	11.0558	84.7183	HSPA8;FTH1;UBC;B2M
Echovirus E25 VP4	43913	0.000472117	0.0440314	0	0	19.4679	149.091	UBC;B2M;ACTB
Salivirus NG-J1 3D	4/56	0.000540244	0.0496951	0	0	10.661	80.2078	FGG;RPL13;ACTB;ACTG1
Ilheus virus full_polyprotein 1..3424	5/100	0.000566686	0.051423	0	0	7.46269	55.7888	HSPA8;HSP90AB1;AMBP;UBC;B2M
Monkeypox virus double-stranded RNA binding protein	5/100	0.000566686	0.0507373	0	0	7.46269	55.7888	HSPA8;HSP90AB1;UBC;RPS3;B2M
Monkeypox virus Zaire-96-I-16 double-strand RNA-binding protein (gene: F3L)	5/100	0.000566686	0.0500697	0	0	7.46269	55.7888	HSPA8;HSP90AB1;UBC;RPS3;B2M
Human alphaherpesvirus 1 large tegument protein (gene: UL36)	5/100	0.000566686	0.0494195	0	0	7.46269	55.7888	HSPA8;UBB;UBC;RPL13;RPS27A
Yellow fever virus anchored core protein C	43915	0.000607165	0.0522707	0	0	17.9104	132.657	HSPA8;UBC;B2M
Adult diarrheal rotavirus strain J19 NSP1	5/102	0.000620288	0.0527245	0	0	7.31636	54.0337	HSPA8;HSP90AB1;UBC;APOE;B2M
Orf virus ORF020 dsRNA-binding PKR inhibitor	5/102	0.000620288	0.0520654	0	0	7.31636	54.0337	EEF1A1;HSPA8;HSP90AB1;UBC;B2M
Human parainfluenza virus 1 strain Washington/1964 phosphoprotein (gene: P)	5/102	0.000620288	0.0514227	0	0	7.31636	54.0337	FGB;HSPA8;MT-CO1;FTH1;UBC
Human respirovirus 1 phosphoprotein (gene: P)	5/102	0.000620288	0.0507956	0	0	7.31636	54.0337	FGB;HSPA8;MT-CO1;FTH1;UBC
SARS coronavirus endoRNAse (gene: orf1ab)	43867	0.000656663	0.0531264	0	0	49.7512	364.594	UBB;UBC
Human rhinovirus A49 2C	43916	0.000683011	0.0546002	0	0	17.2216	125.528	HSPA8;FTH1;UBC
Reston ebolavirus spike glycoprotein (gene: GP)	6/158	0.000690698	0.0545651	0	0	5.66786	41.2496	HSPA8;HSP90AB1;FTH1;UBC;RPL23A;B2M
Lujo mammarenavirus large RNA-dependent RNA polymerase	4/60	0.000702599	0.0548599	0	0	9.95025	72.246	HSPA8;HSP90AB1;UBC;RPL23A
Lake Victoria marburgvirus - Angola2005 glycoprotein (gene: GP)	5/105	0.000707706	0.0546235	0	0	7.10732	51.5528	HSPA8;UBC;FGG;RPL23A;B2M
Dengue virus 4 membrane glycoprotein M (gene: flavivirus polyprotein)	43917	0.000764638	0.0583471	0	0	16.5837	119.007	HSPA8;UBC;ACTB
Variola virus hypothetical protein (gene: A28L)	6/162	0.000787119	0.0593877	0	0	5.52792	39.5087	FGB;HSPA8;FGA;FTH1;UBC;ACTB
SARS coronavirus Tor2 replicase 1AB	5/108	0.000804027	0.0599894	0	0	6.90989	49.2391	UBB;UBC;FAU;RPS27A;B2M
SARS coronavirus P2 full_polyprotein 1..7073	5/109	0.000838209	0.0618525	0	0	6.8465	48.5023	UBB;UBC;FAU;RPS27A;B2M
Dengue virus 3 envelope protein E (gene: flavivirus polyprotein)	4/63	0.00084507	0.0616809	0	0	9.47643	67.0561	HSPA8;HSP90AB1;UBC;B2M
Cercopithecine alphaherpesvirus 2 tegument protein VP22 (gene: UL49)	4/64	0.000896771	0.0647508	0	0	9.32836	65.4544	HSPA8;UBB;UBC;RPS27A
Yellow fever virus core protein C	43919	0.000945915	0.0675725	0	0	15.44	107.515	HSPA8;UBC;B2M
Yellow fever virus envelope protein	43919	0.000945915	0.0668612	0	0	15.44	107.515	HSPA8;HSP90AB1;B2M
Mumps virus strain Jeryl Lynn phosphoprotein (gene: P)	5/113	0.000985868	0.0689594	0	0	6.60415	45.7138	FGB;HSPA8;FTH1;UBC;B2M
Betacoronavirus England 1 NS3B protein (gene: ns3b)	4/67	0.00106521	0.0737411	0	0	8.91067	60.9898	HSPA8;HSP90AB1;UBC;B2M
Parainfluenza virus 5 phosphoprotein (gene: V/P)	4/67	0.00106521	0.0729886	0	0	8.91067	60.9898	FGB;HSPA8;UBC;ALB
Human betacoronavirus 2c England-Qatar/2012 ORF4a	4/67	0.00106521	0.0722513	0	0	8.91067	60.9898	HSPA8;HSP90AB1;UBC;B2M
West Nile virus lineage 2 envelope protein E (gene: flavivirus polyprotein)	4/67	0.00106521	0.0715288	0	0	8.91067	60.9898	HSPA8;HSP90AB1;RPL13;B2M
Human alphaherpesvirus 2 tegument protein VP22 (gene: UL49)	5/116	0.00110868	0.0737111	0	0	6.43335	43.7763	UBB;UBC;RPS27A;ACTB;ACTG1
Enterovirus B genome polyportein	5/118	0.00119663	0.0787785	0	0	6.32431	42.5515	C3;UBC;B2M;ACTB;CFB
SARS coronavirus nsp3-pp1a/pp1ab (gene: orf1ab)	5/118	0.00119663	0.0780136	0	0	6.32431	42.5515	UBB;UBC;MYH9;FAU;RPS27A
Monkeypox virus unknown protein	5/119	0.0012425	0.0802247	0	0	6.27117	41.9581	HSPA8;UBC;MYH9;B2M;GAPDH
Enterovirus B73 full_polyprotein 1..2188	5/119	0.0012425	0.0794606	0	0	6.27117	41.9581	UBC;B2M;GAPDH;ACTB;CFB
Dengue virus 4 nonstructural protein NS3 (gene: flavivirus polyprotein)	3/32	0.00126532	0.0801568	0	0	13.9925	93.3642	AMBP;UBC;GAPDH
Hepatitis C virus subtype 3g full_polyprotein 1..3022	4/71	0.00132278	0.0830138	0	0	8.40866	55.7328	HSPA8;UBC;ALB;B2M
West Nile virus SA93/01 envelope protein	4/71	0.00132278	0.0822451	0	0	8.40866	55.7328	HSPA8;HSP90AB1;UBC;B2M
West Nile virus SPU116/89 envelope protein	4/71	0.00132278	0.0814906	0	0	8.40866	55.7328	HSPA8;HSP90AB1;UBC;B2M
Dengue virus 4 membrane glycoprotein precursor M (gene: flavivirus polyprotein)	3/33	0.00138507	0.0845523	0	0	13.5685	89.3081	HSPA8;UBC;ACTB
Human adenovirus 67 E4 ORF1	3/33	0.00138507	0.0837906	0	0	13.5685	89.3081	HSP90AB1;UBC;B2M
Macacine alphaherpesvirus 1 tegument protein VP22 (gene: UL49)	4/72	0.0013934	0.0835417	0	0	8.29187	54.5274	HSPA8;UBB;UBC;RPS27A
West Nile virus lineage 1 envelope protein E (gene: flavivirus polyprotein)	4/72	0.0013934	0.0828024	0	0	8.29187	54.5274	HSPA8;HSP90AB1;UBC;B2M
Human polyomavirus 6 large T antigen	4/72	0.0013934	0.082076	0	0	8.29187	54.5274	HSPA8;UBC;ALB;B2M
Variola virus double-strand RNA-binding protein (gene: E3L)	4/73	0.00146661	0.085637	0	0	8.17829	53.3617	EEF1A1;HSPA8;UBC;B2M
Dengue virus 1 nonstructural protein NS3 (gene: flavivirus polyprotein)	3/34	0.00151171	0.08751	0	0	13.1694	85.5291	AMBP;UBC;B2M
Human alphaherpesvirus 1 envelope glycoprotein E (gene: US8)	3/34	0.00151171	0.086762	0	0	13.1694	85.5291	HSP90AB1;UBC;B2M
West Nile virus SA381/00 envelope protein	4/74	0.00154245	0.0877759	0	0	8.06777	52.2338	HSPA8;HSP90AB1;UBC;B2M
Human immunodeficiency virus 1 Gag-Pol (gene: gag-pol)	5/125	0.00154548	0.0872091	0	0	5.97015	38.6413	HSPA8;HSP90AB1;UBC;B2M;ACTB
SARS coronavirus RNA-dependent RNA polymerase (gene: orf1ab)	43870	0.00155534	0.0870342	0	0	33.1675	214.463	UBB;UBC
Human betaherpesvirus 5 membrane protein US20 (gene: US20)	43870	0.00155534	0.086315	0	0	33.1675	214.463	HSPA8;UBC
Vaccinia virus hypothetical protein (gene: A49R)	43870	0.00155534	0.0856075	0	0	33.1675	214.463	HSPA8;UBC
Ebola virus - Mayinga, Zaire, 1976 virion spike glycoprotein precursor (gene: GP)	5/126	0.00160082	0.0873942	0	0	5.92277	38.1263	HSPA8;HSP90AB1;UBB;FTH1;UBC
Zaire ebolavirus spike glycoprotein (gene: GP)	5/126	0.00160082	0.0866894	0	0	5.92277	38.1263	HSPA8;HSP90AB1;UBB;FTH1;UBC
Influenza B virus nonstructural protein 1 (gene: NS1)	4/75	0.00162099	0.0870794	0	0	7.9602	51.1421	HSPA8;UBB;UBC;RPS27A
Influenza B virus (B/Memphis/12/97) NS protein	4/75	0.00162099	0.0863883	0	0	7.9602	51.1421	HSPA8;UBB;UBC;RPS27A
Influenza A virus (A/New York/392/2004(H3N2)) matrix protein 1 (gene: M1)	3/35	0.00164539	0.0869983	0	0	12.7932	82.0014	HSPA8;RPL13;B2M
Human papillomavirus 149 E1 (gene: E1)	3/35	0.00164539	0.0863186	0	0	12.7932	82.0014	HSPA8;UBC;S100A8
Murray Valley encephalitis virus envelope protein E	4/76	0.00170226	0.0886099	0	0	7.85546	50.0848	HSPA8;HSP90AB1;RPL13;B2M
Human betaherpesvirus 6 U31, large tegument protein (gene: U31)	4/76	0.00170226	0.0879283	0	0	7.85546	50.0848	UBB;UBC;FAU;RPS27A
Human betaherpesvirus 6A large tegument protein (gene: U31)	4/76	0.00170226	0.0872571	0	0	7.85546	50.0848	UBB;UBC;FAU;RPS27A
Human T-lymphotropic virus 2 Gag-Pro-Pol	5/128	0.00171585	0.0872873	0	0	5.83022	37.126	HSPA8;HSP90AB1;UBC;B2M;RPL6
Cercopithecine betaherpesvirus 5 regulatory protein IE2 (gene: UL122)	3/36	0.00178623	0.0901847	0	0	12.4378	78.7021	HSPA8;FTH1;UBC
Horsepox virus HSPV099 (RNAP subunits)	3/36	0.00178623	0.0895117	0	0	12.4378	78.7021	HSPA8;HSP90AB1;UBC
Human coronavirus OC43 nsp4 (gene: orf1ab)	3/36	0.00178623	0.0888486	0	0	12.4378	78.7021	HSPA8;UBC;B2M
Zika virus envelope protein E (gene: flavivirus polyprotein)	3/36	0.00178623	0.0881953	0	0	12.4378	78.7021	HSPA8;HSP90AB1;B2M
Human betaherpesvirus 6B large tegument protein (gene: U31)	4/77	0.00178632	0.0875559	0	0	7.75344	49.0606	UBB;UBC;FAU;RPS27A
West Nile virus H442 envelope protein	4/77	0.00178632	0.0869214	0	0	7.75344	49.0606	HSPA8;HSP90AB1;UBC;B2M
Echovirus E9 full_polyprotein 1..2203	5/130	0.00183683	0.0887363	0	0	5.74053	36.1637	C3;UBC;HP;B2M;CFB
Influenza A virus (A/Puerto Rico/8/1934(H1N1)) matrix protein 1 (gene: M1)	3/37	0.00193439	0.0927815	0	0	12.1017	75.6107	HSPA8;RPL13;B2M
Horsepox virus HSPV031 (putative virulence factor)	43871	0.00193565	0.0921838	0	0	29.8507	186.487	HSPA8;UBC
Vaccinia virus putative virulence factor (gene: N1L)	43871	0.00193565	0.0915346	0	0	29.8507	186.487	HSPA8;UBC
Vaccinia virus Ankara inhibitor of TNF-R and TLR signalling	43871	0.00193565	0.0908945	0	0	29.8507	186.487	HSPA8;UBC
Yellow fever virus matrix protein M	43871	0.00193565	0.0902633	0	0	29.8507	186.487	UBC;B2M
Variola virus hypothetical protein (gene: A47R)	4/79	0.00196301	0.0909075	0	0	7.55715	47.1058	HSPA8;HSP90AB1;ACTB;ACTG1
Monkeypox virus profilin-like protein	4/80	0.00205573	0.0945494	0	0	7.46269	46.1726	HSPA8;HSP90AB1;ACTB;ACTG1
Monkeypox virus Zaire-96-I-16 A42R (gene: A42R)	4/80	0.00205573	0.0939062	0	0	7.46269	46.1726	HSPA8;HSP90AB1;ACTB;ACTG1
Horsepox virus HSPV164 (Profilin)	4/80	0.00205573	0.0932717	0	0	7.46269	46.1726	HSPA8;HSP90AB1;ACTB;ACTG1
Human coronavirus HKU1 nsp7 (gene: orf1ab)	3/38	0.00208998	0.0941893	0	0	11.7832	72.7094	HSPA8;UBC;B2M
Rotavirus A NSP4	5/134	0.0020974	0.0938936	0	0	5.56917	34.3454	HSPA8;UBB;UBC;FAU;RPS27A
Cowpox virus CPXV179 protein (gene: CPXV179 CDS)	4/81	0.00215143	0.0956746	0	0	7.37055	45.2672	HSPA8;HSP90AB1;ACTB;ACTG1
Vaccinia virus profilin-like protein (gene: A42R)	4/81	0.00215143	0.0950452	0	0	7.37055	45.2672	HSPA8;HSP90AB1;ACTB;ACTG1
Vaccinia virus Ankara Profilin-1-like	4/81	0.00215143	0.094424	0	0	7.37055	45.2672	HSPA8;HSP90AB1;ACTB;ACTG1
Middle East respiratory syndrome-related coronavirus NS4A protein (gene: orf4a)	4/82	0.00225017	0.0981161	0	0	7.28067	44.3884	HSPA8;HSP90AB1;UBC;B2M
Human T-cell leukemia virus type I p21 TM (gene: env)	4/82	0.00225017	0.0974831	0	0	7.28067	44.3884	HSPA8;UBC;ACTB;ACTG1
Human betacoronavirus 2c EMC/2012 ORF4a (gene: orf4a)	4/82	0.00225017	0.0968582	0	0	7.28067	44.3884	HSPA8;HSP90AB1;UBC;B2M
Echovirus E13 VP4	43872	0.00235543	0.100744	0	0	27.137	164.207	UBC;B2M
SARS coronavirus 2-O-ribose methyltransferase (2-o-MT) (gene: orf1ab)	43872	0.00235543	0.100106	0	0	27.137	164.207	UBB;UBC
Cowpox virus CPXV206 protein (gene: CPXV206 CDS)	7/271	0.00236436	0.0998533	0	0	3.85526	23.3137	HSPA8;HSP90AB1;UBC;PABPC1;RPS2;B2M;ACTB
Ectromelia virus ERPV ntp-pph containing mutt motif	3/40	0.00242398	0.101732	0	0	11.194	67.4143	UBC;MYH9;B2M
Norovirus GII/Hu/JP/2002/GII.P12_GII.13/Saitama/T80 VP1 (gene: VP1)	3/40	0.00242398	0.1011	0	0	11.194	67.4143	UBC;B2M;GAPDH
Norovirus GII/Hu/JP/2010/GII.P7_GII.7/Musashimurayama/TAKAsanKimchi VP1 (gene: VP1)	3/40	0.00242398	0.100476	0	0	11.194	67.4143	UBC;B2M;GAPDH
Human adenovirus 18 ORF1 protein (gene: E4)	3/40	0.00242398	0.0998592	0	0	11.194	67.4143	HSP90AB1;UBC;B2M
Human mastadenovirus A E4 ORF1	3/40	0.00242398	0.0992503	0	0	11.194	67.4143	HSP90AB1;UBC;B2M
Human papillomavirus type 6 E2 (gene: E2)	3/40	0.00242398	0.0986487	0	0	11.194	67.4143	HSPA8;UBC;B2M
Human betaherpesvirus 7 large tegument protein (gene: U31)	4/85	0.00256505	0.103761	0	0	7.02371	41.9018	UBB;UBC;FAU;RPS27A
Ectromelia virus ERPV NPH-PPH RNA levels regulator containing mutt motif	3/41	0.00260264	0.104651	0	0	10.921	64.9934	UBC;MYH9;B2M
Sapovirus Hu/GI/Sapporo/MT-2010/1982 VP1	3/41	0.00260264	0.104028	0	0	10.921	64.9934	HSPA8;UBC;GAPDH
Human gammaherpesvirus 4 EBNA-2 nuclear protein (gene: BYRF1)	6/205	0.00261139	0.10376	0	0	4.3684	25.9827	RPS4X;HSP90AB1;MYH9;PABPC1;RPL8;B2M
Human herpesvirus 4 type 2 EBNA-2	6/207	0.00274023	0.108239	0	0	4.3262	25.5233	RPS4X;HSP90AB1;MYH9;PABPC1;RPL8;B2M
Tai Forest ebolavirus spike glycoprotein (gene: GP)	5/143	0.00278102	0.109208	0	0	5.21866	30.7115	HSPA8;HSP90AB1;FTH1;UBC;FGG
Middle East respiratory syndrome-related coronavirus nsp3 protein (gene: orf1ab)	3/42	0.00278923	0.108894	0	0	10.661	62.7078	UBB;UBC;MYH9
Dengue virus 3 nonstructural protein NS3 (gene: flavivirus polyprotein)	3/42	0.00278923	0.108264	0	0	10.661	62.7078	AMBP;UBC;B2M
Monkeypox virus Zaire-96-I-16 D18L (gene: D18L)	43873	0.00281414	0.108603	0	0	24.8756	146.097	HSPA8;UBC
Variola virus hypothetical protein (gene: O3L)	43873	0.00281414	0.107983	0	0	24.8756	146.097	HSPA8;UBC
Yaba monkey tumor virus IEV and EEV membrane glycoprotein	6/209	0.00287378	0.109644	0	0	4.2848	25.0752	C3;HSPA8;HSP90AB1;UBC;PABPC1;B2M
Norovirus Hu/GII.4/NIHIC1.13/2012/USA capsid protein VP1 (gene: VP1)	3/43	0.00298386	0.113201	0	0	10.4131	60.5471	UBC;B2M;GAPDH
Norovirus Hu/GII.4/NIHIC1.16/2012/USA capsid protein VP1 (gene: VP1)	3/43	0.00298386	0.112565	0	0	10.4131	60.5471	UBC;B2M;GAPDH
Powassan virus non-structural protein NS3	3/43	0.00298386	0.111937	0	0	10.4131	60.5471	AMBP;UBC;RPS2
Seoul virus RNA-dependent RNA polymerase (gene: L)	3/43	0.00298386	0.111315	0	0	10.4131	60.5471	HSPA8;UBC;B2M
Seoul virus 80-39 RNA-dependent RNA polymerase (gene: L)	3/43	0.00298386	0.1107	0	0	10.4131	60.5471	HSPA8;UBC;B2M
Dengue virus full_polyprotein 1..3387	4/89	0.00303026	0.111803	0	0	6.70803	38.9006	HSPA8;HSP90AB1;AMBP;UBC
Human adenovirus 6 24 kDa protein	3/44	0.00318665	0.116931	0	0	10.1764	58.5019	HSP90AB1;UBC;B2M
Vaccinia virus Ankara apoptosis inhibitor	3/44	0.00318665	0.116295	0	0	10.1764	58.5019	HSPA8;UBC;ALB
Variola virus hypothetical protein (gene: F10R)	4/91	0.00328314	0.119169	0	0	6.5606	37.5198	UBC;MYH9;PABPC1;B2M
Coxsackievirus B5 polyprotein region 2 (gene: 1A)	43874	0.00331125	0.119543	0	0	22.9621	131.124	UBC;ACTB
Echovirus E15 VP4	43874	0.00331125	0.118904	0	0	22.9621	131.124	UBC;ACTB
Echovirus E32 VP4	43874	0.00331125	0.118271	0	0	22.9621	131.124	UBC;B2M
SARS coronavirus nsp9-pp1a/pp1ab (gene: orf1ab)	43874	0.00331125	0.117646	0	0	22.9621	131.124	UBB;UBC
Human cyclovirus VS5700009 capsid protein	43874	0.00331125	0.117027	0	0	22.9621	131.124	UBC;B2M
Lymphocytic choriomeningitis mammarenavirus L protein	3/45	0.0033977	0.119453	0	0	9.95025	56.5638	HSPA8;HSP90AB1;UBC
Human adenovirus 31 E4 ORF1 protein (gene: E4 ORF1)	3/45	0.0033977	0.118831	0	0	9.95025	56.5638	HSP90AB1;UBC;B2M
Human adenovirus 34 Orf1 protein (gene: E4)	3/45	0.0033977	0.118215	0	0	9.95025	56.5638	HSP90AB1;UBC;B2M
SARS coronavirus nsp8-pp1a/pp1ab (gene: orf1ab)	3/45	0.0033977	0.117606	0	0	9.95025	56.5638	UBB;UBC;RPL13
West Nile virus lineage 1 excised_polyprotein 1..787 (gene: flavivirus polyprotein)	4/92	0.00341482	0.117592	0	0	6.48929	36.8568	HSPA8;HSP90AB1;UBC;B2M
Human enterovirus Ningbo3-02 full_polyprotein 1..2214	4/92	0.00341482	0.116992	0	0	6.48929	36.8568	UBC;HP;B2M;CFB
Human papillomavirus type 68a E2 protein	4/93	0.00355004	0.121008	0	0	6.41952	36.2112	EEF1G;PABPC1;EEF2;B2M
Cowpox virus CPXV086 protein (gene: CPXV086 CDS)	3/46	0.00361711	0.122671	0	0	9.73394	54.725	UBB;UBC;RPS27A
Horsepox virus HSPV117	3/46	0.00361711	0.122055	0	0	9.73394	54.725	HSPA8;UBC;PABPC1
Vaccinia virus Ankara early gene termination factor/Nucleoside triphosphatase I	3/46	0.00361711	0.121445	0	0	9.73394	54.725	HSPA8;UBC;PABPC1
Human immunodeficiency virus vpr protein (gene: vpr)	3/46	0.00361711	0.12084	0	0	9.73394	54.725	HSPA8;UBC;B2M
Dengue virus 4 envelope protein E (gene: flavivirus polyprotein)	4/94	0.00368886	0.122627	0	0	6.35122	35.5823	HSPA8;HSP90AB1;UBC;B2M
Human enterovirus Hangzhou13-02 full_polyprotein 1..2214	4/94	0.00368886	0.122023	0	0	6.35122	35.5823	UBC;HP;B2M;CFB
Ntaya virus full_polyprotein 1..3427	4/95	0.00383132	0.126114	0	0	6.28437	34.9696	HSPA8;HSP90AB1;AMBP;UBC
MW polyomavirus small T antigen	3/47	0.003845	0.125947	0	0	9.52683	52.9786	HSPA8;UBC;ALB
Monkeypox virus viral core cysteine proteinase	3/47	0.003845	0.125336	0	0	9.52683	52.9786	UBB;UBC;RPS27A
Monkeypox virus Cu-Zn superoxide dismutase-like protein	3/47	0.003845	0.12473	0	0	9.52683	52.9786	UBC;MYH9;B2M
Monkeypox virus Zaire-96-I-16 A46R (gene: A46R)	3/47	0.003845	0.12413	0	0	9.52683	52.9786	UBC;MYH9;B2M
Monkeypox virus Zaire-96-I-16 I7L (gene: I7L)	3/47	0.003845	0.123537	0	0	9.52683	52.9786	UBB;UBC;RPS27A
Salivirus A full_polyprotein 1..2370	3/47	0.003845	0.122948	0	0	9.52683	52.9786	HSPA8;UBC;B2M
Variola virus hypothetical protein (gene: K7L)	3/47	0.003845	0.122366	0	0	9.52683	52.9786	UBB;UBC;RPS27A
Yaba monkey tumor virus 86R	3/47	0.003845	0.121788	0	0	9.52683	52.9786	UBC;MYH9;B2M
Yaba-like disease virus 48L protein (gene: 48L)	3/47	0.003845	0.121217	0	0	9.52683	52.9786	UBB;UBC;RPS27A
Human immunodeficiency virus 1 Vpr (gene: vpr)	3/47	0.003845	0.12065	0	0	9.52683	52.9786	HSPA8;UBC;B2M
Human papillomavirus E2 (gene: E2)	3/47	0.003845	0.120089	0	0	9.52683	52.9786	HSP90AB1;PABPC1;B2M
Coxsackievirus A18 VP4 protein	43875	0.00384622	0.119571	0	0	21.322	118.564	UBC;B2M
Echovirus E4 VP4	43875	0.00384622	0.11902	0	0	21.322	118.564	UBC;B2M
SARS coronavirus nsp13-pp1ab (ZD, NTPase/HEL; RNA (gene: orf1ab)	43875	0.00384622	0.118474	0	0	21.322	118.564	UBB;UBC
Yellow fever virus M protein precursor	43875	0.00384622	0.117933	0	0	21.322	118.564	UBC;B2M
Human immunodeficiency virus 1 Pol (gene: gag-pol)	6/222	0.00386413	0.117944	0	0	4.03388	22.4123	HSPA8;HSP90AB1;UBC;B2M;ACTB;ACTG1
Human papillomavirus type 34 early protein (gene: E2)	4/96	0.00397747	0.120854	0	0	6.21891	34.3726	HSP90AB1;PABPC1;EEF2;B2M
Human coronavirus HKU1 nsp3 (gene: orf1ab)	3/48	0.00408144	0.123454	0	0	9.32836	51.3181	UBC;MYH9;B2M
Yaba monkey tumor virus 48L	3/48	0.00408144	0.122901	0	0	9.32836	51.3181	UBB;UBC;RPS27A
Cowpox virus Ati or CPXV158 protein (gene: ati)	4/98	0.00428099	0.128334	0	0	6.09199	33.2231	FGB;FGA;FTH1;FGG
Japanese encephalitis virus envelope protein	3/49	0.00432655	0.129124	0	0	9.13798	49.7379	HSPA8;HSP90AB1;B2M
Human adenovirus 61 E4 ORF1	3/49	0.00432655	0.128552	0	0	9.13798	49.7379	HSP90AB1;UBC;B2M
Human polyomavirus 10 small t antigen	3/49	0.00432655	0.127986	0	0	9.13798	49.7379	HSPA8;UBC;ALB
Merkel cell polyomavirus small T antigen	43876	0.00441855	0.130134	0	0	19.9005	107.899	HSPA8;UBC
Echovirus 9 strain Hill polyprotein region 1	43876	0.00441855	0.129566	0	0	19.9005	107.899	UBC;B2M
Echovirus E27 VP4	43876	0.00441855	0.129002	0	0	19.9005	107.899	UBC;B2M
Echovirus E31 VP4	43876	0.00441855	0.128444	0	0	19.9005	107.899	UBC;B2M
Enterovirus B111 VP4	43876	0.00441855	0.12789	0	0	19.9005	107.899	UBC;B2M
Enterovirus H capsid protein VP4	43876	0.00441855	0.127341	0	0	19.9005	107.899	UBC;B2M
Cowpox virus CPXV128 protein (gene: CPXV128 CDS)	3/50	0.00458041	0.131442	0	0	8.95522	48.2325	HSPA8;UBC;PABPC1
Measles virus genotype D4 phosphoprotein (gene: C/P/V)	4/100	0.00459978	0.131436	0	0	5.97015	32.1298	HSPA8;HSP90AB1;UBC;B2M
Cowpox virus CPXV057 protein (gene: CPXV057 CDS)	8/387	0.00460143	0.130926	0	0	3.08535	16.6035	HSP90AB1;UBB;UBC;MYH9;PABPC1;RPS27A;B2M;GAPDH
Vaccinia virus viral core cysteine proteinase (gene: I7L)	3/51	0.00484311	0.137222	0	0	8.77963	46.7972	UBB;UBC;RPS27A
Vaccinia virus ATPase, nucleoside triphosphate phosphohydrolase-I, NPH-I (gene: D11L)	3/51	0.00484311	0.136645	0	0	8.77963	46.7972	HSPA8;UBC;PABPC1
Measles virus strain MVi/Pennsylvania.USA/20.09 phosphoprotein (gene: P)	4/102	0.00493418	0.138632	0	0	5.85309	31.0891	HSPA8;HSP90AB1;UBC;B2M
Papiine alphaherpesvirus 2 tegument protein VP22 (gene: UL49)	4/102	0.00493418	0.138054	0	0	5.85309	31.0891	HSPA8;UBB;UBC;RPS27A
Human rhinovirus QCE VP4	43877	0.0050277	0.140087	0	0	18.6567	98.7461	UBC;ACTB
Cowpox virus CPXV029 protein (gene: CPXV029 CDS)	43877	0.0050277	0.139508	0	0	18.6567	98.7461	HSPA8;B2M
Echovirus E3 VP4	43877	0.0050277	0.138934	0	0	18.6567	98.7461	UBC;B2M
Horsepox virus HSPV024 (host-range protein; Provisional)	43877	0.0050277	0.138365	0	0	18.6567	98.7461	HSPA8;B2M
SARS coronavirus nsp4-pp1a/pp1ab (gene: orf1ab)	43877	0.0050277	0.1378	0	0	18.6567	98.7461	UBB;UBC
Human enterovirus 79 1A (VP4)	43877	0.0050277	0.13724	0	0	18.6567	98.7461	UBC;ACTB
Human papillomavirus type 52 early protein (gene: E6)	43877	0.0050277	0.136684	0	0	18.6567	98.7461	UBC;B2M
Influenza A virus (A/Northern Territory/60/1968(H3N2)) HA2 (gene: HA)	3/52	0.00511474	0.13849	0	0	8.61079	45.4273	UBC;APOA1;B2M
Norovirus GII/Hu/JP/2001/GII.P22_GII.5/Saitama/T49 VP1 (gene: VP1)	3/52	0.00511474	0.137934	0	0	8.61079	45.4273	EEF1A1;UBC;B2M
Vaccinia virus cowpox A-type inclusion protein	8/397	0.00534973	0.143694	0	0	3.00763	15.732	MT-ATP6;FGB;HSPA8;FGA;FTH1;UBC;FGG;RPL13
Human T-cell leukemia virus type I p15NC-p14PR-p95RT/IN (gene: gag-pro-pol)	5/167	0.00537578	0.143818	0	0	4.46867	23.3526	HSPA8;HSP90AB1;UBC;B2M;GAPDH
Vaccinia virus ser/thr protein kinase-like protein (gene: B12R)	5/167	0.00537578	0.143247	0	0	4.46867	23.3526	HSPA8;UBC;RPS2;B2M;ACTB
Influenza A virus (A/Shanghai/02/2013(H7N9)) hemagglutinin (gene: HA)	3/53	0.00539538	0.143202	0	0	8.44832	44.1189	UBC;PABPC1;B2M
Langat virus nonstructural protein NS3	3/53	0.00539538	0.142638	0	0	8.44832	44.1189	AMBP;UBC;RPS2
Horsepox virus HSPV077 (Vaccinia virus I7 processing peptidase)	3/53	0.00539538	0.142078	0	0	8.44832	44.1189	UBB;UBC;RPS27A
Yaba monkey tumor virus RNA polymerase subunit	3/53	0.00539538	0.141523	0	0	8.44832	44.1189	HSP90AB1;UBC;B2M
Yaba-like disease virus 40R protein (gene: 40R)	3/53	0.00539538	0.140973	0	0	8.44832	44.1189	UBC;ALB;RPL13
Yaba-like disease virus 128L protein (gene: 128L)	3/53	0.00539538	0.140426	0	0	8.44832	44.1189	UBC;MYH9;B2M
Human T-cell leukemia virus type I Pr gag-pro-pol (gene: gag-pro-pol)	5/168	0.00551151	0.142895	0	0	4.44208	23.1029	HSPA8;HSP90AB1;UBC;B2M;GAPDH
Murray Valley encephalitis virus prodexcised_polyprotein 1..793	4/106	0.00565116	0.145952	0	0	5.63222	29.1518	HSPA8;HSP90AB1;RPL13;B2M
SARS coronavirus hypothetical protein sars9b	43878	0.00567317	0.145959	0	0	17.5593	90.8166	UBC;B2M
SARS coronavirus formerly known as growth-factor-like protein (gene: orf1ab)	43878	0.00567317	0.145402	0	0	17.5593	90.8166	UBB;UBC
SARS coronavirus P2 hypothetical protein sars9b	43878	0.00567317	0.144849	0	0	17.5593	90.8166	UBC;B2M
SARS coronavirus Tor2 Orf13	43878	0.00567317	0.144301	0	0	17.5593	90.8166	UBC;B2M
Vaccinia virus host-range protein (gene: C7L)	43878	0.00567317	0.143756	0	0	17.5593	90.8166	HSPA8;B2M
Human immunodeficiency virus 2 vpr protein	3/54	0.00568511	0.143517	0	0	8.29187	42.8682	HSPA8;UBC;B2M
Mumps virus phoshoprotein (gene: V/P)	6/241	0.0057397	0.144352	0	0	3.71586	19.1751	FGB;HSPA8;FTH1;UBC;ALB;B2M
Monkeypox virus DNA polymerase	3/55	0.00598401	0.149935	0	0	8.14111	41.6716	HSPA8;UBC;B2M
Human papillomavirus type 6b regulatory protein E2 (gene: E2)	3/55	0.00598401	0.149378	0	0	8.14111	41.6716	HSPA8;UBC;B2M
Banna virus strain JKT-6423 Vp7	4/108	0.00603441	0.150078	0	0	5.52792	28.2492	EEF1A1;UBC;ACTB;ACTG1
Coxsackievirus A20 full_polyprotein 1..2208	4/108	0.00603441	0.149524	0	0	5.52792	28.2492	UBC;HP;B2M;CFB
Vaccinia virus Kelch-like protein (gene: F3L)	6/245	0.00620692	0.153233	0	0	3.65519	18.576	HSPA8;HSP90AB1;UBB;UBC;RPL13;RPS27A
Vaccinia virus Ankara Kelch-like protein	6/245	0.00620692	0.152672	0	0	3.65519	18.576	HSPA8;HSP90AB1;UBB;UBC;RPL13;RPS27A
Norovirus GII/Hu/JP/2002/GII.P5_GII.5/Saitama/T52 VP1 (gene: VP1)	3/56	0.00629215	0.154204	0	0	7.99574	40.526	EEF1A1;UBC;B2M
HBV genotype B preC/C protein (gene: preC/C)	3/56	0.00629215	0.153643	0	0	7.99574	40.526	HSPA8;UBC;B2M
HBV genotype C core protein (gene: C)	3/56	0.00629215	0.153086	0	0	7.99574	40.526	HSPA8;UBC;B2M
Middle East respiratory syndrome-related coronavirus nsp9 protein (gene: orf1ab)	43879	0.00635445	0.154044	0	0	16.5837	83.8905	UBB;B2M
Human adenovirus 11+34 protein IIIa precursor (gene: L1)	43879	0.00635445	0.15349	0	0	16.5837	83.8905	HSPA8;UBC
Human adenovirus 14 protein IIIa precursor (gene: L1)	43879	0.00635445	0.15294	0	0	16.5837	83.8905	HSPA8;UBC
Orf virus ORF043 hypothetical protein	43879	0.00635445	0.152393	0	0	16.5837	83.8905	UBC;B2M
Yaba-like disease virus 67R protein (gene: 67R)	43879	0.00635445	0.151851	0	0	16.5837	83.8905	HSPA8;B2M
Mumps virus genotype G phosphoprotein (gene: P)	6/247	0.00645065	0.153603	0	0	3.6256	18.286	FGB;HSPA8;FTH1;UBC;ALB;B2M
HBV genotype C HBeAg (gene: PreC/C)	3/57	0.0066096	0.156832	0	0	7.85546	39.4284	HSPA8;UBC;B2M
Hepatitis C virus subtype 3a full_polyprotein 1..3024	3/57	0.0066096	0.15628	0	0	7.85546	39.4284	HSPA8;UBC;B2M
Yaba monkey tumor virus CD47-like protein	3/57	0.0066096	0.155731	0	0	7.85546	39.4284	UBC;MYH9;B2M
Human poliovirus 1 enterovirus precursor polypeptide	4/111	0.00664112	0.155927	0	0	5.37851	26.9704	UBC;HP;B2M;CFB
Alphapapillomavirus 3 regulatory protein E2 (gene: E2)	4/112	0.006852	0.160318	0	0	5.33049	26.563	EEF1G;PABPC1;EEF2;B2M
HBV recombinant C/G HBeAg (gene: preC/C)	3/58	0.00693643	0.16173	0	0	7.72002	38.376	HSPA8;UBC;B2M
Yaba-like disease virus 39L protein (gene: 39L)	3/58	0.00693643	0.16117	0	0	7.72002	38.376	HSPA8;UBC;B2M
Banna virus strain JKT-6423 vp12	4/113	0.00706727	0.163644	0	0	5.28332	26.1645	HSPA8;HSP90AB1;RPS3;B2M
BK polyomavirus small t antigen	43880	0.00707105	0.163169	0	0	15.7109	77.7965	HSPA8;UBC
Cercopithecine betaherpesvirus 5 membrane protein UL14 (gene: UL14)	43880	0.00707105	0.16261	0	0	15.7109	77.7965	UBC;B2M
Coxsackievirus A12 VP4 protein	43880	0.00707105	0.162055	0	0	15.7109	77.7965	UBC;B2M
Human adenovirus 41 IIIa	43880	0.00707105	0.161504	0	0	15.7109	77.7965	HSPA8;UBC
Variola virus host-range protein (gene: D8L)	43880	0.00707105	0.160956	0	0	15.7109	77.7965	HSPA8;B2M
Human mastadenovirus F capsid protein precursor pIIIa (gene: L1)	43880	0.00707105	0.160412	0	0	15.7109	77.7965	HSPA8;UBC
Cercopithecine betaherpesvirus 5 large tegument protein (gene: UL48)	5/179	0.00716826	0.16207	0	0	4.1691	20.5874	FGB;UBB;UBC;FGG;RPS27A
Ectromelia virus ERPV helicase NPH-I	3/59	0.00727272	0.16388	0	0	7.58917	37.3662	HSPA8;UBC;PABPC1
Human coronavirus OC43 Orf1ab (gene: orf1ab)	3/59	0.00727272	0.163332	0	0	7.58917	37.3662	HSPA8;UBC;B2M
Human immunodeficiency virus 1 aspartic peptidase (gene: gag-pol)	3/59	0.00727272	0.162788	0	0	7.58917	37.3662	HSPA8;HSP90AB1;B2M
Coxsackievirus B4 full_polyprotein 1..2183	4/114	0.00728697	0.162565	0	0	5.23697	25.7746	UBC;B2M;ACTB;CFB
Cowpox virus CPXV076 protein (gene: CPXV076 CDS)	3/60	0.00761852	0.169398	0	0	7.46269	36.3968	UBC;ALB;RPL13
HBV recombinant B/C HBc protein (gene: C)	3/60	0.00761852	0.168839	0	0	7.46269	36.3968	HSPA8;UBC;B2M
Sabia mammarenavirus L protein	3/60	0.00761852	0.168284	0	0	7.46269	36.3968	HSPA8;HSP90AB1;UBC
Human papillomavirus type 69 E2	3/60	0.00761852	0.167732	0	0	7.46269	36.3968	UBC;PABPC1;B2M
Vaccinia virus Ankara 150k A-type inclusion protein (ATI) f1	6/257	0.00777491	0.170616	0	0	3.48452	16.9238	FGB;HSPA8;FGA;FTH1;UBC;FGG
Echovirus E16 VP4	43881	0.00782246	0.1711	0	0	14.9254	72.3994	UBC;B2M
Echovirus E2 VP4	43881	0.00782246	0.170545	0	0	14.9254	72.3994	UBC;B2M
Monkeypox virus virokine protein	43881	0.00782246	0.169993	0	0	14.9254	72.3994	HSPA8;UBC
Monkeypox virus Zaire-96-I-16 putative virulence factor (gene: P1L)	43881	0.00782246	0.169445	0	0	14.9254	72.3994	HSPA8;UBC
Ectromelia virus ERPV virokine/NFKb inhibitor	43881	0.00782246	0.1689	0	0	14.9254	72.3994	HSPA8;UBC
Ectromelia virus ERPV host range virulence factor	43881	0.00782246	0.168358	0	0	14.9254	72.3994	HSPA8;B2M
SARS coronavirus leader protein (gene: orf1ab)	43881	0.00782246	0.16782	0	0	14.9254	72.3994	UBB;UBC
Variola virus Ribonucleoside-diphosphate reductase small chain (gene: C8L)	43881	0.00782246	0.167286	0	0	14.9254	72.3994	HSPA8;UBC
Human enterovirus C118 VP4	43881	0.00782246	0.166755	0	0	14.9254	72.3994	UBC;B2M
Horsepox virus HSPV043 (Kelch-like protein; Provisional)	6/258	0.00791734	0.168244	0	0	3.47102	16.7952	HSPA8;HSP90AB1;UBB;UBC;RPS27A;B2M
Human betaherpesvirus 5 membrane glycoprotein UL142 (gene: UL142)	4/117	0.00797298	0.168891	0	0	5.10269	24.6547	RPL4;RPS8;B2M;ACTB
HBV genotype C preC/C protein (gene: preC/C)	3/61	0.00797389	0.168379	0	0	7.34035	35.4655	HSPA8;UBC;B2M
Horsepox virus HSPV066 (DNA polymerase; Provisional)	3/61	0.00797389	0.167852	0	0	7.34035	35.4655	HSPA8;UBC;B2M
Vaccinia virus DNA polymerase (gene: E9L)	3/61	0.00797389	0.167327	0	0	7.34035	35.4655	HSPA8;UBC;B2M
Human betacoronavirus 2c Jordan-N3/2012 ORF4a protein (gene: ORF4a)	3/61	0.00797389	0.166806	0	0	7.34035	35.4655	HSPA8;UBC;B2M
Human gammaherpesvirus 8 ORF64 (gene: ORF64)	3/61	0.00797389	0.166288	0	0	7.34035	35.4655	UBB;UBC;RPS27A
Yaba-like disease virus 86R protein (gene: 86R)	3/61	0.00797389	0.165773	0	0	7.34035	35.4655	UBC;MYH9;B2M
Vaccinia virus Ankara serine proteinase inhibitor / SPI-2 f2	4/118	0.00821075	0.17017	0	0	5.05945	24.297	HSPA8;UBC;RACK1;B2M
Norwalk-like virus full_polyprotein 1..1697	3/62	0.00833889	0.172294	0	0	7.22195	34.5702	HSP90AB1;UBC;B2M
STL polyomavirus large T antigen	3/62	0.00833889	0.171766	0	0	7.22195	34.5702	HSPA8;UBC;B2M
Papiine alphaherpesvirus 2 large tegument protein (gene: UL36)	4/119	0.00845313	0.173586	0	0	5.01693	23.9469	UBB;UBC;RPS27A;B2M
Cercopithecine betaherpesvirus 5 membrane protein US21 (gene: US21)	43882	0.00860819	0.176232	0	0	14.2146	67.5912	UBC;PABPC1
Cowpox virus CPXV037 protein (gene: CPXV037 CDS)	43882	0.00860819	0.175696	0	0	14.2146	67.5912	HSPA8;UBC
Monkeypox virus Zaire-96-I-16 host-range protein (gene: D10L)	43882	0.00860819	0.175164	0	0	14.2146	67.5912	HSPA8;B2M
Human adenovirus 21a protein IIIa precursor (gene: L1)	43882	0.00860819	0.174634	0	0	14.2146	67.5912	HSPA8;UBC
Human adenovirus 31 pIIIa protein (gene: pIIIa)	43882	0.00860819	0.174108	0	0	14.2146	67.5912	HSPA8;UBC
Variola virus putative virulence factor (gene: P1L)	43882	0.00860819	0.173586	0	0	14.2146	67.5912	HSPA8;UBC
Alkhumra hemorrhagic fever virus non-structural protein NS3	3/63	0.00871358	0.175185	0	0	7.10732	33.7091	AMBP;UBC;RPS2
Rio Bravo virus non-structural protein NS3	3/63	0.00871358	0.174662	0	0	7.10732	33.7091	AMBP;UBC;RPS2
Influenza A virus (A/California/04/2009(H1N1)) HA2 (gene: HA)	5/189	0.00895153	0.178897	0	0	3.94851	18.6209	HSPA8;UBC;PABPC1;B2M;ACTB
Influenza A virus (A/California/07/2009(H1N1)) HA2 (gene: HA)	5/189	0.00895153	0.178366	0	0	3.94851	18.6209	HSPA8;UBC;PABPC1;B2M;ACTB
Chapare mammarenavirus L polymerase	3/64	0.00909802	0.180749	0	0	6.99627	32.8804	HSPA8;HSP90AB1;UBC
Human betaherpesvirus 5 large tegument protein (gene: UL48)	3/64	0.00909802	0.180216	0	0	6.99627	32.8804	UBB;UBC;RPS27A
Macacine alphaherpesvirus 1 DNA polymerase processivity subunit (gene: UL42)	43883	0.00942775	0.186198	0	0	13.5685	63.2849	UBC;B2M
Coxsackievirus A8 VP4 protein	43883	0.00942775	0.185652	0	0	13.5685	63.2849	UBC;B2M
Human adenovirus 11+34 DNA binding protein (gene: E2A)	43883	0.00942775	0.185109	0	0	13.5685	63.2849	HSP90AB1;UBC
Human adenovirus 12 protein VI	43883	0.00942775	0.18457	0	0	13.5685	63.2849	HSPA8;UBC
Human adenovirus 17 pVI	43883	0.00942775	0.184033	0	0	13.5685	63.2849	MT-CO1;UBC
Human adenovirus 18 protein IIIa precursor (gene: L1)	43883	0.00942775	0.1835	0	0	13.5685	63.2849	HSPA8;UBC
Human adenovirus 19 pVI (gene: L3)	43883	0.00942775	0.182969	0	0	13.5685	63.2849	MT-CO1;UBC
Human adenovirus 28 VI (gene: VI)	43883	0.00942775	0.182442	0	0	13.5685	63.2849	MT-CO1;UBC
Human adenovirus 36 pVI	43883	0.00942775	0.181918	0	0	13.5685	63.2849	MT-CO1;UBC
Human adenovirus 43 capsid protein precursor pVI (gene: L3)	43883	0.00942775	0.181396	0	0	13.5685	63.2849	MT-CO1;UBC
Human adenovirus 46 pVI	43883	0.00942775	0.180878	0	0	13.5685	63.2849	MT-CO1;UBC
Human adenovirus 49 pVI	43883	0.00942775	0.180363	0	0	13.5685	63.2849	MT-CO1;UBC
Human adenovirus 56 pVI protein (gene: L3)	43883	0.00942775	0.17985	0	0	13.5685	63.2849	MT-CO1;UBC
Human adenovirus 63 pVI protein (gene: L3)	43883	0.00942775	0.179341	0	0	13.5685	63.2849	MT-CO1;UBC
Human adenovirus 67 L3 pVI	43883	0.00942775	0.178834	0	0	13.5685	63.2849	MT-CO1;UBC
Human adenovirus D10 pVI (gene: L3)	43883	0.00942775	0.178331	0	0	13.5685	63.2849	MT-CO1;UBC
Human adenovirus D37 pVI (gene: L3)	43883	0.00942775	0.17783	0	0	13.5685	63.2849	MT-CO1;UBC
Vaccinia virus Ankara 24.5k Kelch-like protein	43883	0.00942775	0.177332	0	0	13.5685	63.2849	HSPA8;UBC
Human mastadenovirus A pVI	43883	0.00942775	0.176836	0	0	13.5685	63.2849	HSPA8;UBC
Human mastadenovirus D capsid protein precursor pVI (gene: L3)	43883	0.00942775	0.176344	0	0	13.5685	63.2849	MT-CO1;UBC
Human mastadenovirus D pVI	43883	0.00942775	0.175854	0	0	13.5685	63.2849	MT-CO1;UBC
Enterovirus B106 full_polyprotein 1..2192	4/123	0.00946939	0.176141	0	0	4.85378	22.6171	C3;UBC;B2M;CFB
HBV genotype C HBc protein (gene: C)	3/65	0.00949224	0.176079	0	0	6.88863	32.0823	HSPA8;UBC;B2M
Human adenovirus E4 protein IVa2	3/65	0.00949224	0.175593	0	0	6.88863	32.0823	UBB;UBC;RPS27A
Vaccinia virus Ankara double-stranded RNA binding protein	3/65	0.00949224	0.175111	0	0	6.88863	32.0823	HSPA8;UBC;S100A8
Variola virus hypothetical protein (gene: F4R)	3/65	0.00949224	0.174631	0	0	6.88863	32.0823	HSPA8;FGG;UBC
Human mastadenovirus E encapsidation protein IVa2 (gene: IVa2)	3/65	0.00949224	0.174154	0	0	6.88863	32.0823	UBB;UBC;RPS27A
Vaccinia virus Ankara DNA polymerase	3/66	0.00989631	0.181073	0	0	6.78426	31.3134	HSPA8;UBC;B2M
Variola virus DNA polymerase (gene: E9L)	3/66	0.00989631	0.180581	0	0	6.78426	31.3134	HSPA8;UBC;B2M
Human parechovirus 5 full_polyprotein 1..2185	3/66	0.00989631	0.180091	0	0	6.78426	31.3134	FTH1;UBC;B2M
Echovirus E5 full_polyprotein 1..2196	4/125	0.0100061	0.181596	0	0	4.77612	21.9919	UBC;HP;ACTB;CFB
Human adenovirus 11a E2A DNA binding protein	43884	0.0102807	0.186077	0	0	12.9786	59.4093	HSP90AB1;UBC
Human adenovirus 12 hexon-associated protein	43884	0.0102807	0.185577	0	0	12.9786	59.4093	HSPA8;UBC
Human adenovirus 14 DNA binding protein (gene: E2A)	43884	0.0102807	0.18508	0	0	12.9786	59.4093	HSP90AB1;UBC
Human adenovirus 21 protein IIIa precursor (gene: L1)	43884	0.0102807	0.184585	0	0	12.9786	59.4093	HSPA8;UBC
Human adenovirus 34 DNA binding protein (gene: E2A)	43884	0.0102807	0.184093	0	0	12.9786	59.4093	HSP90AB1;UBC
Human adenovirus 50 protein IIIa precursor (gene: L1)	43884	0.0102807	0.183603	0	0	12.9786	59.4093	HSPA8;UBC
Human adenovirus 55 E2A 58.3 kDa DNA-binding protein	43884	0.0102807	0.183116	0	0	12.9786	59.4093	HSP90AB1;UBC
Human adenovirus 61 L1 pIIIa	43884	0.0102807	0.182632	0	0	12.9786	59.4093	HSPA8;UBC
Human adenovirus 66 DNA binding protein (gene: E2A)	43884	0.0102807	0.18215	0	0	12.9786	59.4093	HSP90AB1;UBC
Human adenovirus 7 DBP	43884	0.0102807	0.18167	0	0	12.9786	59.4093	HSP90AB1;UBC
Vaccinia virus semaphorin-like protein (gene: A39R)	43884	0.0102807	0.181194	0	0	12.9786	59.4093	HSP90AB1;B2M
Human mastadenovirus A pIIIa	43884	0.0102807	0.180719	0	0	12.9786	59.4093	HSPA8;UBC
Human T-lymphotropic virus 2 full_polyprotein 1..982	4/126	0.0102816	0.180264	0	0	4.73821	21.6887	HSP90AB1;UBC;B2M;RPL6
Cowpox virus CPXV075 protein (gene: CPXV075 CDS)	3/67	0.0103103	0.180296	0	0	6.683	30.5722	HSPA8;UBC;B2M
Molluscum contagiosum virus subtype 1 MC161R (gene: MC161R)	3/67	0.0103103	0.179827	0	0	6.683	30.5722	UBC;PABPC1;B2M
Ectromelia virus ERPV profilin-like protein	3/67	0.0103103	0.179361	0	0	6.683	30.5722	HSPA8;ACTB;ACTG1
Vaccinia virus Ankara CD47-like protein	3/67	0.0103103	0.178898	0	0	6.683	30.5722	UBB;UBC;B2M
Human betaherpesvirus 5 chemokine vCXCL1 (gene: UL146)	4/127	0.0105621	0.182795	0	0	4.7009	21.3914	HSP90AB1;RPS6;UBC;B2M
Cowpox virus CPXV194 protein (gene: CPXV194 CDS)	6/276	0.0108143	0.186679	0	0	3.24465	14.6881	UBB;UBC;RPL13;MT-CO2;RPS27A;B2M
Nipah henipavirus P phosphoprotein	7/361	0.0109733	0.188937	0	0	2.89412	13.0591	FGB;HSPA8;FGA;FTH1;UBC;APOA1;PABPC1
Alphapapillomavirus 3 replication protein E1 (gene: E1)	43885	0.0111665	0.191772	0	0	12.4378	55.906	UBC;B2M
Cyclovirus PK5222 replication-association protein (gene: rep)	43885	0.0111665	0.191283	0	0	12.4378	55.906	UBC;B2M
Monkeypox virus BTB domain of kelch-like protein	43885	0.0111665	0.190796	0	0	12.4378	55.906	HSPA8;UBC
Monkeypox virus Zaire-96-I-16 D12L (gene: D12L)	43885	0.0111665	0.190312	0	0	12.4378	55.906	HSPA8;UBC
Human adenovirus 52 pVI (gene: pVI)	43885	0.0111665	0.18983	0	0	12.4378	55.906	HSPA8;UBC
Human adenovirus 7d2 DNA binding protein (gene: E2A)	43885	0.0111665	0.189351	0	0	12.4378	55.906	HSP90AB1;UBC
Kyasanur Forest disease virus NS3	3/69	0.011168	0.1889	0	0	6.48929	29.1674	AMBP;UBC;RPS2
Human gammaherpesvirus 8 KCP (gene: ORF4)	3/69	0.011168	0.188425	0	0	6.48929	29.1674	C3;B2M;CFB
Human papillomavirus type 84 putative regulatory protein E2 (gene: E2)	3/69	0.011168	0.187953	0	0	6.48929	29.1674	PABPC1;EEF2;B2M
HBV genotype B C protein (gene: C)	3/70	0.0116119	0.194935	0	0	6.39659	28.5014	HSPA8;UBC;B2M
Alphapapillomavirus 4 early protein E2 (gene: E2)	4/131	0.0117333	0.196482	0	0	4.55737	20.259	EEF1G;MYH9;PABPC1;B2M
Bundibugyo ebolavirus spike glycoprotein (gene: GP)	4/131	0.0117333	0.195993	0	0	4.55737	20.259	HSPA8;HSP90AB1;FTH1;UBC
Molluscum contagiosum virus subtype 1 MC013L (gene: MC013L)	4/131	0.0117333	0.195506	0	0	4.55737	20.259	HSPA8;HSP90AB1;UBC;B2M
Human papillomavirus type 2 E2 protein (gene: E2)	4/131	0.0117333	0.195023	0	0	4.55737	20.259	EEF1G;MYH9;PABPC1;B2M
Macaque simian foamy virus Pol (gene: pol)	4/132	0.0120386	0.199603	0	0	4.52284	19.9893	RPS4X;HSP90AB1;UBC;B2M
Louping ill virus nonstructural protein NS3	3/71	0.0120658	0.199562	0	0	6.3065	27.8582	AMBP;UBC;RPS2
Hepatitis C virus subtype 4a full_polyprotein 1..3008 (gene: HCV G4)	3/71	0.0120658	0.199072	0	0	6.3065	27.8582	HSP90AB1;UBC;B2M
Macacine alphaherpesvirus 1 envelope glycoprotein G (gene: US4)	43886	0.0120847	0.198894	0	0	11.9403	52.7262	UBC;B2M
Horsepox virus HSPV074d (ribonucleoside--diphosphate reductase large subunit)	43886	0.0120847	0.198407	0	0	11.9403	52.7262	HSPA8;UBC
Norovirus Hu/Shanghai/SH312/2009/CHN VP1	43886	0.0120847	0.197923	0	0	11.9403	52.7262	UBC;GAPDH
Human betaherpesvirus 5 DNA polymerase catalytic subunit (gene: UL54)	43886	0.0120847	0.197442	0	0	11.9403	52.7262	HSPA8;UBC
Human immunodeficiency virus 1 reverse transcriptase p51 subunit (gene: gag-pol)	43886	0.0120847	0.196963	0	0	11.9403	52.7262	UBC;B2M
Human rhinovirus A65 3D	43886	0.0120847	0.196486	0	0	11.9403	52.7262	UBC;B2M
Influenza A virus (A/New York/599/1996(H3N2)) hemagglutinin (gene: HA)	3/72	0.0125299	0.203232	0	0	6.21891	27.2366	UBC;APOA1;B2M
HBV genotype C C protein (gene: C)	3/72	0.0125299	0.202742	0	0	6.21891	27.2366	HSPA8;UBC;B2M
Human betaherpesvirus 6B G-protein coupled receptor (gene: U12)	3/72	0.0125299	0.202255	0	0	6.21891	27.2366	MT-ATP6;HSPA8;UBC
Langat virus envelope membrane-associated glycoprotein	3/73	0.013004	0.209405	0	0	6.13371	26.6356	HSPA8;HSP90AB1;RPL13
Modoc virus non-structural protein 3	3/73	0.013004	0.208904	0	0	6.13371	26.6356	AMBP;UBC;RPS2
Human adenovirus 16 DNA binding protein (gene: E2A)	43887	0.0130348	0.208899	0	0	11.4811	49.8293	HSP90AB1;UBC
Human parechovirus 6 2C	43887	0.0130348	0.208402	0	0	11.4811	49.8293	FTH1;UBC
African green monkey simian foamy virus Pol precursor (gene: pol)	4/136	0.0133106	0.212306	0	0	4.38982	18.9605	RPS4X;HSP90AB1;UBC;B2M
Rosavirus A2 full_polyprotein 1..2468	3/74	0.0134883	0.21463	0	0	6.05083	26.0545	EEF1A1;UBC;B2M
Ectromelia virus ERPV kelch-like protein	6/291	0.0137472	0.218233	0	0	3.0774	13.1926	HSPA8;HSP90AB1;UBB;UBC;RPS27A;B2M
Sudan ebolavirus spike glycoprotein (gene: GP)	4/138	0.0139775	0.221365	0	0	4.3262	18.4742	HSPA8;FTH1;UBC;B2M
Sudan ebolavirus - Nakisamata structural glycoprotein (gene: GP)	4/138	0.0139775	0.220844	0	0	4.3262	18.4742	HSPA8;FTH1;UBC;B2M
Hepatitis C virus subtype 4n full_polyprotein 1..3007	3/75	0.0139828	0.220409	0	0	5.97015	25.4921	HSP90AB1;UBC;B2M
Human rhinovirus B97 3D	43888	0.0140164	0.220422	0	0	11.0558	47.181	UBC;ALB
Human adenovirus 41 VI	43888	0.0140164	0.219907	0	0	11.0558	47.181	HSPA8;UBC
Human papillomavirus 98 E7 protein (gene: E7)	43888	0.0140164	0.219395	0	0	11.0558	47.181	UBC;HP
Influenza A virus (A/New York/602/1996(H3N2)) hemagglutinin (gene: HA)	3/76	0.0144875	0.22624	0	0	5.89159	24.9478	UBC;APOA1;B2M
KI polyomavirus Stockholm 350 large T antigen	3/76	0.0144875	0.225715	0	0	5.89159	24.9478	HSPA8;UBC;ALB
Rio Bravo virus envelope protein	3/76	0.0144875	0.225193	0	0	5.89159	24.9478	HSP90AB1;UBC;B2M
Monkeypox virus bifunctional hemagglutinin/type-I membrane glycoprotein	7/384	0.0149729	0.2322	0	0	2.72077	11.4314	HSP90AB1;UBB;UBC;RPL13;MT-CO2;RPS27A;B2M
Influenza A virus (A/New York/599/1996(H3N2)) HA2 (gene: HA)	3/77	0.0150024	0.232122	0	0	5.81508	24.4207	UBC;APOA1;B2M
Influenza A virus (A/New York/602/1996(H3N2)) HA2 (gene: HA)	3/77	0.0150024	0.231588	0	0	5.81508	24.4207	UBC;APOA1;B2M
Yaba monkey tumor virus double-strand RNA-binding protein	3/77	0.0150024	0.231057	0	0	5.81508	24.4207	HSPA8;HSP90AB1;UBC
Human mastadenovirus B encapsidation protein IVa2 (gene: IVa2)	3/77	0.0150024	0.230528	0	0	5.81508	24.4207	UBB;UBC;RPS27A
Human papillomavirus type 59 ORF putative E2	3/77	0.0150024	0.230002	0	0	5.81508	24.4207	PABPC1;EEF2;B2M
Human papillomavirus type 78 regulatory protein E2 (gene: E2)	3/77	0.0150024	0.229478	0	0	5.81508	24.4207	PABPC1;EEF2;B2M
Cercopithecine betaherpesvirus 5 membrane protein US27D (gene: US27D)	43889	0.0150291	0.229364	0	0	10.661	44.7523	HSPA8;UBC
Louping ill virus capsid (core) protein	43889	0.0150291	0.228844	0	0	10.661	44.7523	UBC;RPL13
Middle East respiratory syndrome-related coronavirus nsp8 protein (gene: orf1ab)	43889	0.0150291	0.228326	0	0	10.661	44.7523	UBB;B2M
Human adenovirus 12 early E2A DNA-binding protein	43889	0.0150291	0.227811	0	0	10.661	44.7523	HSP90AB1;UBC
Yaba-like disease virus 84R protein (gene: 84R)	43889	0.0150291	0.227298	0	0	10.661	44.7523	HSPA8;UBC
Human mastadenovirus A DBP	43889	0.0150291	0.226787	0	0	10.661	44.7523	HSP90AB1;UBC
Human parechovirus 6 capsid protein VP0	43889	0.0150291	0.226278	0	0	10.661	44.7523	UBC;B2M
Simian foamy virus full_polyprotein 1..1146 (gene: pol)	4/142	0.0153741	0.230956	0	0	4.20433	17.5534	RPS4X;HSP90AB1;UBC;B2M
KI polyomavirus large T antigen	3/78	0.0155275	0.23274	0	0	5.74053	23.9101	HSPA8;UBC;ALB
Human immunodeficiency virus 1 integrase (gene: gag-pol)	5/218	0.0158076	0.23641	0	0	3.42325	14.1971	HSP90AB1;UBC;B2M;ACTB;ACTG1
Orf virus ORF095 DNA helicase	3/79	0.016063	0.239695	0	0	5.66786	23.4153	HSPA8;UBC;PABPC1
Human alphaherpesvirus 3 large tegument protein (gene: ORF22)	3/79	0.016063	0.239164	0	0	5.66786	23.4153	UBB;UBC;RPS27A
Human herpesvirus 3 strain Dumas Large tegument protein deneddylase (gene: ORF22)	3/79	0.016063	0.238635	0	0	5.66786	23.4153	UBB;UBC;RPS27A
Human papillomavirus 3 envelope protein (gene: E2)	3/79	0.016063	0.238108	0	0	5.66786	23.4153	PABPC1;EEF2;B2M
Cowpox virus CPXV126 protein (gene: CPXV126 CDS)	43890	0.0160723	0.237721	0	0	10.2934	42.5184	UBC;B2M
Dengue virus 3 anchored capsid protein C (gene: flavivirus polyprotein)	43890	0.0160723	0.237198	0	0	10.2934	42.5184	HSPA8;B2M
Norovirus Hu/GII.3/Jingzhou/2013402/CHN major capsid protein VP1	43890	0.0160723	0.236678	0	0	10.2934	42.5184	UBC;GAPDH
Human adenovirus 1 DBP	43890	0.0160723	0.23616	0	0	10.2934	42.5184	HSP90AB1;UBC
Papiine alphaherpesvirus 2 envelope glycoprotein G (gene: US4)	43890	0.0160723	0.235645	0	0	10.2934	42.5184	UBC;B2M
Parvovirus NIH-CQV putative capsid protein (gene: cap)	43890	0.0160723	0.235131	0	0	10.2934	42.5184	UBC;B2M
Sudan ebolavirus minor nucleoprotein (gene: VP30)	43890	0.0160723	0.23462	0	0	10.2934	42.5184	HSPA8;UBC
Sudan ebolavirus - Nakisamata minor nucleoprotein (gene: VP30)	43890	0.0160723	0.234111	0	0	10.2934	42.5184	HSPA8;UBC
Vaccinia virus contains mutT-like motif of NTP-phosphohydrolase for DNA repair (gene: D9R)	43890	0.0160723	0.233605	0	0	10.2934	42.5184	UBC;B2M
Human betaherpesvirus 5 interleukin-10 (gene: UL111A)	43890	0.0160723	0.2331	0	0	10.2934	42.5184	HSPA8;UBC
Vaccinia virus sulfhydryl oxidase (gene: E10R)	43890	0.0160723	0.232598	0	0	10.2934	42.5184	UBC;ALB
Human gammaherpesvirus 8 ORF16 (gene: ORF16)	43890	0.0160723	0.232097	0	0	10.2934	42.5184	HSPA8;UBC
Lake Victoria marburgvirus - Leiden glycoprotein (gene: GP)	4/144	0.0161043	0.23206	0	0	4.14594	17.1172	HSPA8;UBC;FGG;RPL23A
Human papillomavirus type 114 E2 protein (gene: E2)	4/145	0.0164774	0.236928	0	0	4.11734	16.9049	EEF1G;PABPC1;EEF2;B2M
Influenza A virus (A/New York/392/2004(H3N2)) HA2 (gene: HA)	3/80	0.0166087	0.238307	0	0	5.59701	22.9356	UBC;APOA1;B2M
Cowpox virus CPXV087 protein (gene: CPXV087 CDS)	3/80	0.0166087	0.237799	0	0	5.59701	22.9356	HSPA8;UBC;PABPC1
Orf virus ORF071 NPH-PPH downregulator	3/80	0.0166087	0.237293	0	0	5.59701	22.9356	UBC;MYH9;B2M
Human mastadenovirus F encapsidation protein IVa2 (gene: IVa2)	3/80	0.0166087	0.236789	0	0	5.59701	22.9356	UBB;UBC;ALB
Crimean-Congo hemorrhagic fever virus full_polyprotein 1..3945 (gene: RdRp)	4/146	0.0168558	0.239803	0	0	4.08914	16.6962	UBB;UBC;FAU;RPS27A
Aichi virus 1 VP0	2/30	0.0171456	0.243409	0	0	9.95025	40.4579	UBC;B2M
Human rhinovirus B83 3D	2/30	0.0171456	0.242896	0	0	9.95025	40.4579	UBC;ALB
Dengue virus 2 capsid protein C (gene: flavivirus polyprotein)	2/30	0.0171456	0.242384	0	0	9.95025	40.4579	HSPA8;UBC
Norovirus Hu/GII.3/CBNU1/2006/KOR capsid protein	2/30	0.0171456	0.241875	0	0	9.95025	40.4579	UBC;GAPDH
Human adenovirus 52 pIIIa (gene: pIIIa)	2/30	0.0171456	0.241368	0	0	9.95025	40.4579	HSPA8;UBC
Human immunodeficiency virus 2 vpx protein	2/30	0.0171456	0.240863	0	0	9.95025	40.4579	HSPA8;RPL23A
Human rhinovirus B27 3D	2/30	0.0171456	0.24036	0	0	9.95025	40.4579	UBC;ALB
Human rhinovirus B4 3D (polymerase)	2/30	0.0171456	0.23986	0	0	9.95025	40.4579	UBC;ALB
Influenza A virus (A/Northern Territory/60/1968(H3N2)) hemagglutinin (gene: HA)	3/81	0.0171648	0.239629	0	0	5.52792	22.4704	UBC;APOA1;B2M
Dugbe virus L protein	4/147	0.0172397	0.240176	0	0	4.06133	16.4912	UBB;UBC;FAU;RPS27A
Hepatitis C virus subtype 1g full_polyprotein 1..3015	3/82	0.0177311	0.246511	0	0	5.4605	22.0191	HSPA8;HSP90AB1;B2M
Variola virus hypothetical protein (gene: J9R)	7/398	0.0178649	0.247857	0	0	2.62507	10.5657	TTR;UBB;UBC;RPL13;MT-CO2;RPS27A;B2M
Vaccinia virus kelch-like protein (gene: C2L)	5/226	0.0181827	0.251746	0	0	3.30207	13.2323	HSPA8;UBB;UBC;RPS27A;B2M
Human rhinovirus B99 1D	2/31	0.0182486	0.252138	0	0	9.62927	38.5524	UBC;B2M
Norovirus Hu/GII.3/HK71/1978/CHN capsid protein VP1 (gene: VP1)	2/31	0.0182486	0.25162	0	0	9.62927	38.5524	UBC;GAPDH
Human betaherpesvirus 5 membrane glycoprotein UL141 (gene: UL141)	2/31	0.0182486	0.251105	0	0	9.62927	38.5524	UBC;B2M
Human papillomavirus 167 E7 (gene: E7)	2/31	0.0182486	0.250591	0	0	9.62927	38.5524	UBC;B2M
Cercopithecine betaherpesvirus 5 tegument protein UL37 (gene: UL47)	5/229	0.019131	0.262172	0	0	3.25882	12.8933	FGB;HSPA8;FTH1;UBC;PABPC1
Human rhinovirus B92 3D	2/32	0.0193808	0.265055	0	0	9.32836	36.7861	UBC;ALB
Dengue virus 1 membrane glycoprotein precursor M (gene: flavivirus polyprotein)	2/32	0.0193808	0.264516	0	0	9.32836	36.7861	HSPA8;B2M
Dengue virus 3 capsid protein C (gene: flavivirus polyprotein)	2/32	0.0193808	0.26398	0	0	9.32836	36.7861	HSPA8;B2M
Hepatitis C virus genotype 4 p7 protein	2/32	0.0193808	0.263445	0	0	9.32836	36.7861	HSPA8;APOA1
Human adenovirus 68 DNA binding protein (gene: E2A)	2/32	0.0193808	0.262913	0	0	9.32836	36.7861	HSP90AB1;UBC
Human alphaherpesvirus 1 helicase-primase helicase subunit (gene: UL5)	2/32	0.0193808	0.262383	0	0	9.32836	36.7861	UBC;GAPDH
Sin Nombre virus viral RNA polymerase (L protein)	2/32	0.0193808	0.261855	0	0	9.32836	36.7861	HSPA8;UBC
Vaccinia virus Ankara 24.6k putative hydrolase.	2/32	0.0193808	0.261329	0	0	9.32836	36.7861	UBC;B2M
Enterovirus C99 full_polyprotein 1..2210	3/85	0.0194924	0.262307	0	0	5.26778	20.7431	HP;B2M;CFB
Human papillomavirus 125 putative E2 protein (gene: E2)	3/85	0.0194924	0.261783	0	0	5.26778	20.7431	PABPC1;EEF2;B2M
Monkeypox virus Zaire-96-I-16 B2R (gene: B2R)	10/702	0.019807	0.265477	0	0	2.12612	8.33805	C3;UBB;UBC;ALB;LCN2;RACK1;RPL13;MT-CO2;RPS27A;B2M
Variola virus hypothetical protein (gene: J7R)	4/154	0.0200803	0.268603	0	0	3.87672	15.1503	HSPA8;RPL7A;UBC;B2M
Lake Victoria marburgvirus - DRC1999 glycoprotein (gene: GP)	3/86	0.0201002	0.268335	0	0	5.20653	20.342	HSPA8;UBC;RPL23A
Human papillomavirus type 62 putative regulatory protein E2 (gene: E2)	3/86	0.0201002	0.267803	0	0	5.20653	20.342	PABPC1;EEF2;B2M
Human papillomavirus type 86 putative regulatory protein E2 (gene: E2)	3/86	0.0201002	0.267273	0	0	5.20653	20.342	PABPC1;EEF2;B2M
Japanese encephalitis virus core protein C	2/33	0.0205418	0.272605	0	0	9.04568	35.1451	HSPA8;ACTB
Coxsackievirus A8 3D protein	2/33	0.0205418	0.272068	0	0	9.04568	35.1451	UBC;ALB
Murray Valley encephalitis virus NS3	2/33	0.0205418	0.271532	0	0	9.04568	35.1451	AMBP;UBC
Enterovirus A 3D	2/33	0.0205418	0.270999	0	0	9.04568	35.1451	UBC;ALB
Papiine alphaherpesvirus 2 deoxyuridine triphosphatase (gene: UL50)	2/33	0.0205418	0.270467	0	0	9.04568	35.1451	UBC;B2M
Reston ebolavirus - Reston VP35 (gene: VP35)	2/33	0.0205418	0.269938	0	0	9.04568	35.1451	UBC;B2M
Rhinovirus B69 3D	2/33	0.0205418	0.269411	0	0	9.04568	35.1451	UBC;ALB
Human alphaherpesvirus 3 envelope glycoprotein E (gene: ORF68)	2/33	0.0205418	0.268885	0	0	9.04568	35.1451	UBC;B2M
Human coronavirus 229E nucleocapsid protein (gene: N)	2/33	0.0205418	0.268362	0	0	9.04568	35.1451	PABPC1;B2M
Human herpesvirus 3 strain Dumas membrane glycoprotein gE	2/33	0.0205418	0.267841	0	0	9.04568	35.1451	UBC;B2M
Zika virus anchored capsid protein C (gene: flavivirus polyprotein)	2/33	0.0205418	0.267322	0	0	9.04568	35.1451	HSPA8;UBC
Human mastadenovirus B single-stranded DNA-binding protein (gene: E2A)	2/33	0.0205418	0.266805	0	0	9.04568	35.1451	HSP90AB1;UBC
Human papillomavirus type 49 E7 protein (gene: E7)	2/33	0.0205418	0.26629	0	0	9.04568	35.1451	UBC;HP
Yaba-like disease virus 141R protein (gene: 141R)	4/156	0.0209417	0.270951	0	0	3.82702	14.7953	UBB;UBC;RPL13;B2M
Japanese encephalitis virus prodexcised_polyprotein 1..794	3/88	0.0213469	0.275663	0	0	5.0882	19.5735	HSPA8;HSP90AB1;B2M
Cercopithecine betaherpesvirus 5 membrane glycoprotein UL141 (gene: UL141)	2/34	0.0217312	0.280086	0	0	8.77963	33.6173	UBC;B2M
Coxsackievirus A12 3D protein	2/34	0.0217312	0.27955	0	0	8.77963	33.6173	UBC;ALB
Mupapillomavirus 1 E7 protein (gene: E7)	2/34	0.0217312	0.279015	0	0	8.77963	33.6173	UBC;B2M
Hepatitis C virus (isolate 6a33) putative p7 protein	2/34	0.0217312	0.278483	0	0	8.77963	33.6173	HSPA8;APOA1
Hepatitis C virus genotype 2 p7 protein	2/34	0.0217312	0.277952	0	0	8.77963	33.6173	HSPA8;APOA1
Hepatitis C virus genotype 3 p7 protein	2/34	0.0217312	0.277424	0	0	8.77963	33.6173	HSPA8;APOA1
Hepatitis C virus genotype 6 p7 protein	2/34	0.0217312	0.276897	0	0	8.77963	33.6173	HSPA8;APOA1
Human adenovirus 52 E4 ORF1 (gene: E4)	2/34	0.0217312	0.276373	0	0	8.77963	33.6173	UBC;B2M
Human adenovirus Chiba_E086/2012 CR1-b (gene: E3)	2/34	0.0217312	0.275851	0	0	8.77963	33.6173	UBC;B2M
Human adenovirus E4 E3 19 kDa protein	2/34	0.0217312	0.27533	0	0	8.77963	33.6173	HSP90AB1;B2M
Tula virus RNA polymerase (L protein)	2/34	0.0217312	0.274812	0	0	8.77963	33.6173	HSPA8;UBC
Vaccinia virus DNA-dependent RNA polymerase subunit rpo147 (gene: J6R)	2/34	0.0217312	0.274295	0	0	8.77963	33.6173	HSPA8;UBC
Vaccinia virus Ankara RNA polymerase subunit rpo147	2/34	0.0217312	0.27378	0	0	8.77963	33.6173	HSPA8;UBC
Human gammaherpesvirus 4 membrane protein (gene: BILF1)	2/34	0.0217312	0.273268	0	0	8.77963	33.6173	HSPA8;UBC
Human herpesvirus 4 type 2 BILF1	2/34	0.0217312	0.272757	0	0	8.77963	33.6173	HSPA8;UBC
Human mastadenovirus E membrane glycoprotein E3 gp19K (gene: E3)	2/34	0.0217312	0.272248	0	0	8.77963	33.6173	HSP90AB1;B2M
Human papillomavirus 116 E7 protein	2/34	0.0217312	0.271741	0	0	8.77963	33.6173	UBC;B2M
Human papillomavirus type 101 E7 protein	2/34	0.0217312	0.271236	0	0	8.77963	33.6173	UBC;B2M
Human papillomavirus type 67 E7	2/34	0.0217312	0.270733	0	0	8.77963	33.6173	UBC;B2M
Human papillomavirus type 7 early protein (gene: E7)	2/34	0.0217312	0.270231	0	0	8.77963	33.6173	UBC;B2M
Ectromelia virus ERPV IL-1 beta receptor	3/89	0.0219859	0.272893	0	0	5.03102	19.2052	UBC;MYH9;B2M
HMO Astrovirus A non-structural protein	3/89	0.0219859	0.27239	0	0	5.03102	19.2052	AMBP;UBC;B2M
Human alphaherpesvirus 3 ubiquitin E3 ligase ICP0 (gene: ORF61)	5/238	0.0221695	0.274158	0	0	3.13558	11.9436	HSP90AB1;UBB;UBC;FAU;RPS27A
Human herpesvirus 3 strain Dumas ring-finger protein	5/238	0.0221695	0.273654	0	0	3.13558	11.9436	HSP90AB1;UBB;UBC;FAU;RPS27A
Trichodysplasia spinulosa-associated polyomavirus large T antigen (gene: T)	3/90	0.0226352	0.278891	0	0	4.97512	18.847	HSPA8;UBC;B2M
Vaccinia virus Ankara NTP-dependent RNA helicase, NPH-II	3/90	0.0226352	0.27838	0	0	4.97512	18.847	HSPA8;UBC;PABPC1
Influenza B virus (B/Memphis/12/97) M1 protein	2/35	0.0229485	0.281717	0	0	8.52878	32.1919	HSPA8;UBC
Middle East respiratory syndrome-related coronavirus nsp15 protein (gene: orf1ab)	2/35	0.0229485	0.281203	0	0	8.52878	32.1919	UBB;B2M
Dengue virus 3 membrane glycoprotein precursor M (gene: flavivirus polyprotein)	2/35	0.0229485	0.280691	0	0	8.52878	32.1919	HSPA8;B2M
Norovirus Hu/GII.2/HS255/2011/USA capsid protein VP1 (gene: VP1)	2/35	0.0229485	0.280181	0	0	8.52878	32.1919	UBC;B2M
Horsepox virus HSPV115 (Nudix hydrolase)	2/35	0.0229485	0.279672	0	0	8.52878	32.1919	UBC;MYH9
Norovirus Hu/GII.4/Woonona/NSW3309/2012/AU VP1	2/35	0.0229485	0.279165	0	0	8.52878	32.1919	UBC;GAPDH
Snow Mountain virus viral protein 1 (gene: ORF2)	2/35	0.0229485	0.278661	0	0	8.52878	32.1919	B2M;GAPDH
Variola virus hypothetical protein (gene: A41L)	2/35	0.0229485	0.278158	0	0	8.52878	32.1919	UBC;B2M
Human papillomavirus 15 early protein (gene: E7)	2/35	0.0229485	0.277656	0	0	8.52878	32.1919	UBC;B2M
Human papillomavirus KC5 E7 (gene: E7)	2/35	0.0229485	0.277157	0	0	8.52878	32.1919	UBC;B2M
Human papillomavirus type 163 E1 (gene: E1)	2/35	0.0229485	0.276659	0	0	8.52878	32.1919	UBC;B2M
Human papillomavirus type 49 E1 protein (gene: E1)	2/35	0.0229485	0.276164	0	0	8.52878	32.1919	UBC;B2M
Molluscum contagiosum virus subtype 1 MC099R (gene: MC099R)	3/91	0.023295	0.279831	0	0	4.92045	18.4985	UBC;MYH9;B2M
Human immunodeficiency virus 1 Pr55(Gag) (gene: gag)	3/91	0.023295	0.279332	0	0	4.92045	18.4985	HSPA8;UBC;B2M
Monkeypox virus Zaire-96-I-16 IL-beta-binding protein (gene: B14R)	3/92	0.0239651	0.286855	0	0	4.86697	18.1594	UBC;MYH9;B2M
Human enteric coronavirus strain 4408 full_polyprotein 1..4383	3/92	0.0239651	0.286344	0	0	4.86697	18.1594	HSPA8;UBC;B2M
Human rhinovirus B91 3D	2/36	0.0241934	0.288558	0	0	8.29187	30.8597	UBC;ALB
Cercopithecine betaherpesvirus 5 protein UL83B (gene: UL83B)	2/36	0.0241934	0.288047	0	0	8.29187	30.8597	HSP90AB1;B2M
Influenza B virus matrix protein 1 (gene: M1)	2/36	0.0241934	0.287537	0	0	8.29187	30.8597	HSPA8;UBC
Cyclovirus PK5006 replication-association protein (gene: rep)	2/36	0.0241934	0.287029	0	0	8.29187	30.8597	UBC;B2M
Norovirus GII/Hu/JP/2007/GII.P7_GII.14/Fukuoka/KK282 VP1 (gene: VP1)	2/36	0.0241934	0.286523	0	0	8.29187	30.8597	UBC;B2M
Norovirus Hu/GII.4/5M/USA/2004 VP1	2/36	0.0241934	0.286018	0	0	8.29187	30.8597	UBC;GAPDH
Norovirus Hu/GII.4/CHDC4871/1977/US VP1	2/36	0.0241934	0.285516	0	0	8.29187	30.8597	UBC;GAPDH
Norovirus Hu/GII.4/CHDC5191/1974/USA capsid protein VP1 (gene: VP1)	2/36	0.0241934	0.285015	0	0	8.29187	30.8597	UBC;GAPDH
Orf virus ORF025 DNA polymerase	2/36	0.0241934	0.284516	0	0	8.29187	30.8597	UBC;B2M
Rhinovirus B 3D	2/36	0.0241934	0.284018	0	0	8.29187	30.8597	UBC;ALB
Human alphaherpesvirus 3 ribonucleotide reductase subunit 2 (gene: ORF18)	2/36	0.0241934	0.283523	0	0	8.29187	30.8597	FTH1;UBC
Human betaherpesvirus 7 deoxyuridine triphosphatase (gene: U45)	2/36	0.0241934	0.283029	0	0	8.29187	30.8597	MYH9;B2M
Variola virus hypothetical protein (gene: F9R)	2/36	0.0241934	0.282536	0	0	8.29187	30.8597	UBC;B2M
Human herpesvirus 3 strain Dumas ribonucleotide reductase (small subunit)	2/36	0.0241934	0.282046	0	0	8.29187	30.8597	FTH1;UBC
Human immunodeficiency virus pol protein (gene: pol)	5/245	0.0247384	0.2879	0	0	3.04599	11.2683	HSPA8;HSP90AB1;UBC;B2M;GAPDH
Measles morbillivirus phosphoprotein (gene: P/V/C)	3/94	0.0253365	0.29435	0	0	4.76342	17.508	HSPA8;UBC;B2M
Measles virus genotype G3 phosphoprotein (gene: C/P/V)	3/94	0.0253365	0.293842	0	0	4.76342	17.508	HSPA8;UBC;B2M
Measles virus strain Edmonston-Zagreb phosphoprotein (gene: P)	3/94	0.0253365	0.293335	0	0	4.76342	17.508	HSPA8;UBC;B2M
Measles virus strain MVi/Arizona.USA/11.08/2 phosphoprotein (gene: P)	3/94	0.0253365	0.29283	0	0	4.76342	17.508	HSPA8;UBC;B2M
Measles virus strain MVi/California.USA/16.03 phosphoprotein (gene: P)	3/94	0.0253365	0.292327	0	0	4.76342	17.508	HSPA8;UBC;B2M
Measles virus strain MVi/Florida.USA/19.09 phosphoprotein (gene: P)	3/94	0.0253365	0.291826	0	0	4.76342	17.508	HSPA8;UBC;B2M
Measles virus strain MVi/New Jersey.USA/45.05 phosphoprotein (gene: P)	3/94	0.0253365	0.291326	0	0	4.76342	17.508	HSPA8;UBC;B2M
Measles virus strain MVi/New York.USA/26.09/3 phosphoprotein (gene: P)	3/94	0.0253365	0.290828	0	0	4.76342	17.508	HSPA8;UBC;B2M
Human papillomavirus type 128 E2 (gene: E2)	3/94	0.0253365	0.290332	0	0	4.76342	17.508	PABPC1;EEF2;B2M
Human rhinovirus B70 3D (polymerase)	2/37	0.0254653	0.291311	0	0	8.06777	29.6122	UBC;ALB
Murray Valley encephalitis virus core protein C	2/37	0.0254653	0.290816	0	0	8.06777	29.6122	HSPA8;ACTB
Norovirus GII/Hu/HKG/2013/GII.4/CUHK-NS-141 VP1	2/37	0.0254653	0.290322	0	0	8.06777	29.6122	UBC;GAPDH
Norovirus Hu/GII.14/8610/Saga/2008/JPN capsid protein	2/37	0.0254653	0.28983	0	0	8.06777	29.6122	UBC;B2M
Norovirus Hu/GII.4/HS191/2004/USA VP1	2/37	0.0254653	0.289339	0	0	8.06777	29.6122	UBC;GAPDH
Norovirus Hu/GII.4/HS66/2001/USA capsid protein VP1 (gene: VP1)	2/37	0.0254653	0.288851	0	0	8.06777	29.6122	UBC;GAPDH
Norovirus Hu/GII.4/Jiangsu2/2012/CHN major capsid protein	2/37	0.0254653	0.288363	0	0	8.06777	29.6122	UBC;GAPDH
Norovirus Hu/GII.4/gg-12-08-04/2012/KR major capsid protein	2/37	0.0254653	0.287878	0	0	8.06777	29.6122	UBC;GAPDH
Trichodysplasia spinulosa-associated polyomavirus small T antigen (gene: T)	2/37	0.0254653	0.287394	0	0	8.06777	29.6122	HSPA8;UBC
Human enterovirus C117 3D	2/37	0.0254653	0.286912	0	0	8.06777	29.6122	UBC;ALB
Zika virus capsid protein C (gene: flavivirus polyprotein)	2/37	0.0254653	0.286431	0	0	8.06777	29.6122	HSPA8;UBC
Human papillomavirus type 112 E7 protein (gene: E7)	2/37	0.0254653	0.285952	0	0	8.06777	29.6122	UBC;B2M
Human papillomavirus type 43 E7 protein (gene: E7)	2/37	0.0254653	0.285475	0	0	8.06777	29.6122	UBC;B2M
Human papillomavirus type 68b E7 protein (gene: E7)	2/37	0.0254653	0.284999	0	0	8.06777	29.6122	UBC;B2M
Human papillomavirus type 83 transactivator (gene: E2)	3/95	0.0260377	0.290921	0	0	4.71328	17.195	PABPC1;EEF2;B2M
Cowpox virus CPXV209 protein (gene: CPXV209 CDS)	4/167	0.0260836	0.290949	0	0	3.57494	13.0358	TTR;UBC;MYH9;B2M
Measles virus strain MVi/Washington.USA/18.08/1 phosphoprotein (gene: P)	3/96	0.0267493	0.29788	0	0	4.66418	16.8901	HSPA8;UBC;B2M
Human T-lymphotropic virus 4 polymerase (gene: pol)	3/96	0.0267493	0.297387	0	0	4.66418	16.8901	UBC;B2M;RPL6
Alkhumra hemorrhagic fever virus core protein C	2/38	0.0267639	0.297058	0	0	7.85546	28.4423	HSPA8;RPL13
Cercopithecine alphaherpesvirus 2 envelope glycoprotein E (gene: US8)	2/38	0.0267639	0.296567	0	0	7.85546	28.4423	HSP90AB1;B2M
Coxsackievirus A8 VP1 protein	2/38	0.0267639	0.296079	0	0	7.85546	28.4423	UBC;B2M
Cyclovirus TN18 replication-association protein (gene: rep)	2/38	0.0267639	0.295592	0	0	7.85546	28.4423	UBC;B2M
Monkeypox virus Zaire-96-I-16 Hypothetical protein (gene: C7L)	2/38	0.0267639	0.295106	0	0	7.85546	28.4423	HSPA8;UBC
Ectromelia virus ERPV disulfide bond formation pathway protein	2/38	0.0267639	0.294623	0	0	7.85546	28.4423	UBC;ALB
Enterovirus B97 excised_polyprotein 1728..2189	2/38	0.0267639	0.29414	0	0	7.85546	28.4423	UBC;ALB
Norovirus GII/Hu/TW/2012/GII.Pe_GII.4_Sydney2012/Taipei/105 VP1 (gene: VP1)	2/38	0.0267639	0.29366	0	0	7.85546	28.4423	UBC;GAPDH
Norovirus GII/Hu/TW/2012/GII.Pe_GII.4_Sydney2012/Taipei/106 VP1 (gene: VP1)	2/38	0.0267639	0.293181	0	0	7.85546	28.4423	UBC;GAPDH
Norovirus Hu/GII.4/CHDC2094/1974/US VP1	2/38	0.0267639	0.292703	0	0	7.85546	28.4423	UBC;GAPDH
Norovirus Hu/GII.4/Jingzhou/2013403/CHN major capsid protein VP1	2/38	0.0267639	0.292227	0	0	7.85546	28.4423	UBC;GAPDH
Norovirus Hu/GII.4/MD-2004/2004/US VP1	2/38	0.0267639	0.291753	0	0	7.85546	28.4423	UBC;GAPDH
Horsepox virus HSPV160 (CD47 immunoglobulin-like domain)	2/38	0.0267639	0.29128	0	0	7.85546	28.4423	UBC;B2M
Norovirus Hu/GII/BG1C0405/2012/BGD capsid protein VP1 (gene: VP1)	2/38	0.0267639	0.290809	0	0	7.85546	28.4423	UBC;GAPDH
Human adenovirus 46 ORF4	2/38	0.0267639	0.290339	0	0	7.85546	28.4423	UBC;B2M
Human adenovirus 58 ORF1 (gene: E4)	2/38	0.0267639	0.289871	0	0	7.85546	28.4423	UBC;B2M
Human adenovirus 63 Orf 1 protein (gene: E4)	2/38	0.0267639	0.289404	0	0	7.85546	28.4423	UBC;B2M
Orf virus ORF067 uracil DNA glycosidase	2/38	0.0267639	0.288939	0	0	7.85546	28.4423	HSP90AB1;UBC
Papiine alphaherpesvirus 2 envelope glycoprotein E (gene: US8)	2/38	0.0267639	0.288475	0	0	7.85546	28.4423	HSP90AB1;B2M
Rhinovirus B48 3D (polymerase)	2/38	0.0267639	0.288013	0	0	7.85546	28.4423	UBC;ALB
SARS coronavirus hypothetical protein sars7a	2/38	0.0267639	0.287552	0	0	7.85546	28.4423	UBC;B2M
SARS coronavirus P2 hypothetical protein sars7a	2/38	0.0267639	0.287092	0	0	7.85546	28.4423	UBC;B2M
SARS coronavirus Tor2 Orf8	2/38	0.0267639	0.286635	0	0	7.85546	28.4423	UBC;B2M
Human cyclovirus replication-associated protein	2/38	0.0267639	0.286178	0	0	7.85546	28.4423	UBC;B2M
Yaba-like disease virus 12L protein (gene: 12L)	2/38	0.0267639	0.285723	0	0	7.85546	28.4423	HSPA8;UBC
Human papillomavirus 99 E7 protein (gene: E7)	2/38	0.0267639	0.28527	0	0	7.85546	28.4423	UBC;B2M
Human papillomavirus type 40 early protein (gene: E7)	2/38	0.0267639	0.284817	0	0	7.85546	28.4423	UBC;B2M
Human parechovirus 4 RNA-dependent RNA Polymerase	2/38	0.0267639	0.284367	0	0	7.85546	28.4423	UBC;B2M
Measles virus strain MVi/California.USA/8.04 phosphoprotein (gene: P)	3/97	0.0274713	0.291422	0	0	4.61609	16.5931	HSPA8;UBC;B2M
Menangle virus phosphoprotein (gene: V/P)	3/97	0.0274713	0.290962	0	0	4.61609	16.5931	HSPA8;UBC;B2M
Human papillomavirus type 57 E2	3/97	0.0274713	0.290504	0	0	4.61609	16.5931	PABPC1;EEF2;B2M
Cercopithecine betaherpesvirus 5 membrane protein RL11A (gene: RL11A)	2/39	0.0280888	0.296567	0	0	7.65404	27.3432	UBC;B2M
Coxsackievirus A13 vp1	2/39	0.0280888	0.296101	0	0	7.65404	27.3432	UBC;B2M
Cyclovirus PK5034 replication-association protein (gene: rep)	2/39	0.0280888	0.295637	0	0	7.65404	27.3432	UBC;B2M
Norovirus GII/Hu/JP/2007/GII.P7_GII.14/Sendai/YG99 VP1 (gene: VP1)	2/39	0.0280888	0.295175	0	0	7.65404	27.3432	UBC;B2M
Norovirus Hu/GII.4/Ohio/7I/2012/USA major capsid protein	2/39	0.0280888	0.294713	0	0	7.65404	27.3432	UBC;GAPDH
Human adenovirus 19 ORF1 (gene: E4)	2/39	0.0280888	0.294254	0	0	7.65404	27.3432	UBC;B2M
Norovirus Hu/Norwalk/10328/2010/VNM capsid protein VP1 (gene: VP1)	2/39	0.0280888	0.293795	0	0	7.65404	27.3432	UBC;GAPDH
Human adenovirus 49 pIVa2	2/39	0.0280888	0.293338	0	0	7.65404	27.3432	UBC;B2M
Human adenovirus 64 E4 7.4 kDa protein	2/39	0.0280888	0.292883	0	0	7.65404	27.3432	UBC;B2M
Human adenovirus Chiba_E086/2012 Orf1 (gene: E4)	2/39	0.0280888	0.292429	0	0	7.65404	27.3432	UBC;B2M
Human adenovirus D10 Orf1 protein (gene: E4)	2/39	0.0280888	0.291976	0	0	7.65404	27.3432	UBC;B2M
Human adenovirus D37 14.0 kDa (gene: E4)	2/39	0.0280888	0.291525	0	0	7.65404	27.3432	UBC;B2M
Human calicivirus NLV/GII/Langen1061/2002/DE major structural protein	2/39	0.0280888	0.291075	0	0	7.65404	27.3432	UBC;GAPDH
Human coronavirus OC43 nsp1 (gene: orf1ab)	2/39	0.0280888	0.290627	0	0	7.65404	27.3432	UBC;B2M
Human immunodeficiency virus 1 matrix (gene: gag)	2/39	0.0280888	0.290179	0	0	7.65404	27.3432	UBC;B2M
Human mastadenovirus D control protein E4orf1 (gene: E4)	2/39	0.0280888	0.289734	0	0	7.65404	27.3432	UBC;B2M
Human papillomavirus type 32 early protein (gene: E7)	2/39	0.0280888	0.289289	0	0	7.65404	27.3432	UBC;B2M
Measles virus genotype D8 phosphoprotein (gene: P/V/C)	3/98	0.0282037	0.290027	0	0	4.56899	16.3036	HSPA8;UBC;B2M
Human alphaherpesvirus 3 tegument protein VP22 (gene: ORF9)	3/98	0.0282037	0.289583	0	0	4.56899	16.3036	HSPA8;UBC;MT-CO3
Human herpesvirus 3 strain Dumas Tegument protein VP22 (gene: ORF9)	3/98	0.0282037	0.289141	0	0	4.56899	16.3036	HSPA8;UBC;MT-CO3
Measles virus strain MVi/Texas.USA/4.07 phosphoprotein (gene: P)	3/99	0.0289463	0.296303	0	0	4.52284	16.0213	HSPA8;UBC;B2M
Measles virus strain MVi/Virginia.USA/15.09 phosphoprotein (gene: P)	3/99	0.0289463	0.295852	0	0	4.52284	16.0213	HSPA8;UBC;B2M
Human rhinovirus QCE 3C	2/40	0.0294396	0.300436	0	0	7.46269	26.3091	UBC;B2M
Cowpox virus CPXV048 (gene: CPXV048 CDS)	2/40	0.0294396	0.29998	0	0	7.46269	26.3091	HSPA8;UBC
Macacine alphaherpesvirus 1 deoxyuridine triphosphatase (gene: UL50)	2/40	0.0294396	0.299526	0	0	7.46269	26.3091	UBC;B2M
Coxsackievirus A17 VP1	2/40	0.0294396	0.299073	0	0	7.46269	26.3091	UBC;B2M
Monkeypox virus Zaire-96-I-16 sulfhydryl oxidase (gene: F9R)	2/40	0.0294396	0.298621	0	0	7.46269	26.3091	UBC;ALB
Norovirus Hu/GII-4/CGMH19/2009/TW major viral capsid protein (gene: VP1)	2/40	0.0294396	0.298171	0	0	7.46269	26.3091	UBC;GAPDH
Horsepox virus HSPV041 (Hypothetical protein)	2/40	0.0294396	0.297722	0	0	7.46269	26.3091	HSPA8;UBC
Norovirus Hu/GII/Seoul1367/KOR/2010 major capsid protein	2/40	0.0294396	0.297274	0	0	7.46269	26.3091	UBC;GAPDH
Human adenovirus 19 pIVa2 (gene: IVa2)	2/40	0.0294396	0.296828	0	0	7.46269	26.3091	UBC;B2M
Powassan virus core protein C	2/40	0.0294396	0.296383	0	0	7.46269	26.3091	HSPA8;RPL13
Human adenovirus 68 ORF1 (gene: E4)	2/40	0.0294396	0.295939	0	0	7.46269	26.3091	UBC;B2M
Human adenovirus 71 maturation protein (gene: IVa2)	2/40	0.0294396	0.295496	0	0	7.46269	26.3091	UBC;B2M
Variola virus hypothetical protein (gene: C5L)	2/40	0.0294396	0.295055	0	0	7.46269	26.3091	HSPA8;UBC
Human enterovirus C102 vp1	2/40	0.0294396	0.294616	0	0	7.46269	26.3091	UBC;B2M
Human papillomavirus type 69 E7	2/40	0.0294396	0.294177	0	0	7.46269	26.3091	UBC;B2M
Human papillomavirus type 97 E2 protein	2/40	0.0294396	0.29374	0	0	7.46269	26.3091	PABPC1;B2M
Echovirus E18 full_polyprotein 1..2189	3/101	0.0304626	0.303496	0	0	4.43328	15.4777	C3;UBC;CFB
Influenza A virus (A/Shanghai/02/2013(H7N9)) HA2 (gene: HA)	2/41	0.0308159	0.306561	0	0	7.28067	25.3347	PABPC1;B2M
Cowpox virus CPXV175 protein (gene: CPXV175 CDS)	2/41	0.0308159	0.306108	0	0	7.28067	25.3347	UBC;B2M
Coxsackievirus B5 VP2 capsid protein, polyprotein region 3 (gene: 1A)	2/41	0.0308159	0.305655	0	0	7.28067	25.3347	B2M;CFB
Cyclovirus TN25 replication-association protein (gene: rep)	2/41	0.0308159	0.305205	0	0	7.28067	25.3347	UBC;B2M
Molluscum contagiosum virus subtype 1 MC003L (gene: MC003L)	2/41	0.0308159	0.304755	0	0	7.28067	25.3347	HSP90AB1;B2M
Ectromelia virus ERPV virion core protease	2/41	0.0308159	0.304307	0	0	7.28067	25.3347	UBB;UBC
Norovirus Hu/GII.4/Jannali/NSW774M/2011/AU VP1	2/41	0.0308159	0.30386	0	0	7.28067	25.3347	UBC;GAPDH
Norovirus Hu/GII.4/Ohio/7G/2012/USA major capsid protein	2/41	0.0308159	0.303415	0	0	7.28067	25.3347	UBC;GAPDH
Norovirus Hu/GII.4/Seoul/1071/2010/KOR major capsid protein	2/41	0.0308159	0.30297	0	0	7.28067	25.3347	UBC;GAPDH
Human adenovirus 11+34 E4 ORF1 protein (gene: E4)	2/41	0.0308159	0.302527	0	0	7.28067	25.3347	UBC;B2M
Norovirus Hu/GII/Seoul1055/KOR/2010 major capsid protein	2/41	0.0308159	0.302086	0	0	7.28067	25.3347	UBC;GAPDH
Human adenovirus 14 DNA polymerase (gene: E2B)	2/41	0.0308159	0.301645	0	0	7.28067	25.3347	UBC;B2M
Human adenovirus 22 ORF1 (gene: E4)	2/41	0.0308159	0.301206	0	0	7.28067	25.3347	UBC;B2M
Human adenovirus 35 E4 ORF1	2/41	0.0308159	0.300768	0	0	7.28067	25.3347	UBC;B2M
Human adenovirus 56 Orf 1 protein (gene: E4)	2/41	0.0308159	0.300332	0	0	7.28067	25.3347	UBC;B2M
Human adenovirus 56 IVa2 protein (gene: IVa2)	2/41	0.0308159	0.299897	0	0	7.28067	25.3347	UBC;B2M
Human papillomavirus 19 early protein (gene: E7)	2/41	0.0308159	0.299463	0	0	7.28067	25.3347	UBC;B2M
Human papillomavirus type 115 early protein E7 (gene: E7)	2/41	0.0308159	0.29903	0	0	7.28067	25.3347	UBC;B2M
Human rhinovirus B17 full_polyprotein 1..2186	3/102	0.0312362	0.302671	0	0	4.38982	15.2159	C3;UBC;B2M
Horsepox virus HSPV192 (IL-beta-binding protein; Provisional)	4/177	0.0313622	0.303454	0	0	3.37297	11.6777	TTR;UBC;B2M;GAPDH
Human adenovirus 56 CR1 beta protein (gene: E3)	4/178	0.0319221	0.308428	0	0	3.35402	11.5528	EEF1A1;UBC;ALB;B2M
Influenza A virus (A/California/04/2009(H1N1)) polymerase PB1 (gene: PB1)	2/42	0.0322172	0.310831	0	0	7.10732	24.4155	FGB;HSPA8
Influenza A virus (A/California/07/2009(H1N1)) polymerase PB1 (gene: PB1)	2/42	0.0322172	0.310385	0	0	7.10732	24.4155	FGB;HSPA8
Influenza A virus (A/Korea/426/1968(H2N2)) PB1 polymerase subunit (gene: PB1)	2/42	0.0322172	0.309941	0	0	7.10732	24.4155	FGB;HSPA8
Influenza A virus (A/New York/392/2004(H3N2)) polymerase PB1 (gene: PB1)	2/42	0.0322172	0.309497	0	0	7.10732	24.4155	FGB;HSPA8
Influenza A virus (A/New York/599/1996(H3N2)) polymerase PB1 (gene: PB1)	2/42	0.0322172	0.309055	0	0	7.10732	24.4155	FGB;HSPA8
Influenza A virus (A/New York/602/1996(H3N2)) polymerase PB1 (gene: PB1)	2/42	0.0322172	0.308614	0	0	7.10732	24.4155	FGB;HSPA8
Influenza A virus (A/Northern Territory/60/1968(H3N2)) polymerase PB1 (gene: PB1)	2/42	0.0322172	0.308175	0	0	7.10732	24.4155	FGB;HSPA8
Influenza A virus (A/Puerto Rico/8/1934(H1N1)) polymerase PB1 (gene: PB1)	2/42	0.0322172	0.307736	0	0	7.10732	24.4155	FGB;HSPA8
Influenza A virus (A/Shanghai/02/2013(H7N9)) polymerase PB1 (gene: PB1)	2/42	0.0322172	0.307299	0	0	7.10732	24.4155	FGB;HSPA8
Influenza A virus (A/goose/Guangdong/1/1996(H5N1)) polymerase (gene: PB1)	2/42	0.0322172	0.306863	0	0	7.10732	24.4155	FGB;HSPA8
Circo-like virus-Brazil hs1 putative Rep protein (gene: ORF3)	2/42	0.0322172	0.306429	0	0	7.10732	24.4155	UBC;B2M
Circo-like virus-Brazil hs2 putative Rep protein	2/42	0.0322172	0.305995	0	0	7.10732	24.4155	UBC;B2M
Coxsackievirus A18 VP1 protein	2/42	0.0322172	0.305563	0	0	7.10732	24.4155	UBC;B2M
Enterovirus B 1B(VP2)	2/42	0.0322172	0.305132	0	0	7.10732	24.4155	B2M;CFB
Norovirus Hu/GII-4/CGMH01/2006/TW major viral capsid protein (gene: VP1)	2/42	0.0322172	0.304702	0	0	7.10732	24.4155	UBC;GAPDH
Norovirus Hu/GII.4/JB-15/KOR/2008 capsid protein	2/42	0.0322172	0.304274	0	0	7.10732	24.4155	UBC;GAPDH
Human adenovirus 11a E4 ORF1 protein	2/42	0.0322172	0.303846	0	0	7.10732	24.4155	UBC;B2M
Human adenovirus 14 Orf1 protein (gene: E4)	2/42	0.0322172	0.30342	0	0	7.10732	24.4155	UBC;B2M
Human adenovirus 21 14.2 kDa protein (gene: E4)	2/42	0.0322172	0.302995	0	0	7.10732	24.4155	UBC;B2M
Human adenovirus 21a 14.2 kDa protein (gene: E4)	2/42	0.0322172	0.302572	0	0	7.10732	24.4155	UBC;B2M
Human adenovirus 3+7 ORF1 (gene: E4)	2/42	0.0322172	0.302149	0	0	7.10732	24.4155	UBC;B2M
Human adenovirus 43 hypothetical protein (gene: E4)	2/42	0.0322172	0.301728	0	0	7.10732	24.4155	UBC;B2M
Human adenovirus 50 Orf1 protein (gene: E4)	2/42	0.0322172	0.301307	0	0	7.10732	24.4155	UBC;B2M
Human adenovirus 55 E4 ORF1 14.2 kDa protein	2/42	0.0322172	0.300888	0	0	7.10732	24.4155	UBC;B2M
Orf virus ORF026 putative IMV redox protein	2/42	0.0322172	0.30047	0	0	7.10732	24.4155	UBC;ALB
Papiine alphaherpesvirus 2 membrane protein UL45 (gene: UL45)	2/42	0.0322172	0.300054	0	0	7.10732	24.4155	HSP90AB1;B2M
Human adenovirus 66 ORF1 (gene: E4)	2/42	0.0322172	0.299638	0	0	7.10732	24.4155	UBC;B2M
Human adenovirus 66 fiber protein (gene: L5)	2/42	0.0322172	0.299224	0	0	7.10732	24.4155	PABPC1;B2M
Human adenovirus 7 E4 ORF1	2/42	0.0322172	0.29881	0	0	7.10732	24.4155	UBC;B2M
Human adenovirus 7d2 ORF1 (gene: E4)	2/42	0.0322172	0.298398	0	0	7.10732	24.4155	UBC;B2M
Human adenovirus B3 E4 ORF1 (gene: E4)	2/42	0.0322172	0.297987	0	0	7.10732	24.4155	UBC;B2M
Human adenovirus D10 pIVa2 (gene: pIVa2)	2/42	0.0322172	0.297577	0	0	7.10732	24.4155	UBC;B2M
Human adenovirus E4 E4 13.5 kDa protein	2/42	0.0322172	0.297169	0	0	7.10732	24.4155	UBC;B2M
Vaccinia virus Hypothetical protein (gene: F1L)	2/42	0.0322172	0.296761	0	0	7.10732	24.4155	HSPA8;UBC
Vaccinia virus Ankara viral core cysteine proteinase	2/42	0.0322172	0.296354	0	0	7.10732	24.4155	UBB;UBC
Human betaherpesvirus 7 ribonucleotide reductase subunit 1 (gene: U28)	2/42	0.0322172	0.295949	0	0	7.10732	24.4155	HSPA8;UBC
Human circovirus VS6600022 replication-associated protein	2/42	0.0322172	0.295545	0	0	7.10732	24.4155	UBC;B2M
Human mastadenovirus D encapsidation protein IVa2 (gene: IVa2)	2/42	0.0322172	0.295141	0	0	7.10732	24.4155	UBC;B2M
Human mastadenovirus E control protein E4orf1 (gene: E4)	2/42	0.0322172	0.294739	0	0	7.10732	24.4155	UBC;B2M
Human papillomavirus type 30 early protein (gene: E7)	2/42	0.0322172	0.294338	0	0	7.10732	24.4155	UBC;B2M
Human mastadenovirus D membrane glycoprotein E3 CR1-beta (gene: E3)	4/179	0.0324879	0.296408	0	0	3.33528	11.4296	EEF1A1;UBC;ALB;B2M
Human foamy virus pol	3/104	0.0328142	0.298979	0	0	4.3054	14.7111	HSP90AB1;UBC;B2M
Human adenovirus 11+34 hexon protein (gene: L3)	43835	0.0330572	0.300784	0	0	29.8507	101.777	FGG
Human adenovirus 11a L3 hexon protein	43835	0.0330572	0.300377	0	0	29.8507	101.777	FGG
Human adenovirus 12 hexon protein (Late protein 2)	43835	0.0330572	0.299971	0	0	29.8507	101.777	FGG
Human adenovirus 14 hexon protein (gene: L3)	43835	0.0330572	0.299567	0	0	29.8507	101.777	FGG
Human adenovirus 16 hexon (gene: L3)	43835	0.0330572	0.299163	0	0	29.8507	101.777	FGG
Human adenovirus 18 hexon protein (gene: L3)	43835	0.0330572	0.29876	0	0	29.8507	101.777	FGG
Human adenovirus 21 DNA polymerase (gene: E2B)	43835	0.0330572	0.298359	0	0	29.8507	101.777	UBC
Human adenovirus 21a DNA polymerase (gene: E2B)	43835	0.0330572	0.297958	0	0	29.8507	101.777	UBC
Human adenovirus 21a hexon protein (gene: L3)	43835	0.0330572	0.297559	0	0	29.8507	101.777	FGG
Human adenovirus 22 hexon (gene: L3)	43835	0.0330572	0.29716	0	0	29.8507	101.777	FGG
Human adenovirus 28 hexon	43835	0.0330572	0.296763	0	0	29.8507	101.777	FGG
Human adenovirus 3+7 hexon (gene: L3)	43835	0.0330572	0.296367	0	0	29.8507	101.777	FGG
Human adenovirus 34 hexon protein (gene: L3)	43835	0.0330572	0.295972	0	0	29.8507	101.777	FGG
Human adenovirus 36 hexon	43835	0.0330572	0.295578	0	0	29.8507	101.777	FGG
Human adenovirus 41 hexon	43835	0.0330572	0.295185	0	0	29.8507	101.777	FGG
Human adenovirus 46 hexon	43835	0.0330572	0.294793	0	0	29.8507	101.777	FGG
Human adenovirus 50 hexon protein (gene: L3)	43835	0.0330572	0.294402	0	0	29.8507	101.777	FGG
Human adenovirus 55 L3 hexon 106.9 kDa protein	43835	0.0330572	0.294012	0	0	29.8507	101.777	FGG
Human adenovirus 58 hexon (gene: L2)	43835	0.0330572	0.293623	0	0	29.8507	101.777	FGG
Human adenovirus 61 L3 Hexon	43835	0.0330572	0.293235	0	0	29.8507	101.777	FGG
Human adenovirus 63 hexon protein (gene: L3)	43835	0.0330572	0.292848	0	0	29.8507	101.777	FGG
Human adenovirus 64 hexon protein	43835	0.0330572	0.292462	0	0	29.8507	101.777	FGG
Human adenovirus 65 L3 hexon	43835	0.0330572	0.292077	0	0	29.8507	101.777	FGG
Human adenovirus 66 hexon (gene: L3)	43835	0.0330572	0.291694	0	0	29.8507	101.777	FGG
Human adenovirus 7 hexon	43835	0.0330572	0.291311	0	0	29.8507	101.777	FGG
Human adenovirus 7d2 hexon (gene: L3)	43835	0.0330572	0.290929	0	0	29.8507	101.777	FGG
Human adenovirus D10 hexon (gene: L3)	43835	0.0330572	0.290548	0	0	29.8507	101.777	FGG
Human adenovirus D37 hexon (gene: L3)	43835	0.0330572	0.290168	0	0	29.8507	101.777	FGG
Human alphaherpesvirus 1 ribonucleotide reductase subunit 1 (gene: UL39)	43835	0.0330572	0.28979	0	0	29.8507	101.777	UBC
Human alphaherpesvirus 2 ribonucleotide reductase subunit 1 (gene: UL39)	43835	0.0330572	0.289412	0	0	29.8507	101.777	UBC
Human betaherpesvirus 6A DNA polymerase processivity subunit (gene: U27)	43835	0.0330572	0.289035	0	0	29.8507	101.777	UBC
Human betaherpesvirus 6B Polymerase processivity factor (gene: U27)	43835	0.0330572	0.288659	0	0	29.8507	101.777	UBC
Human mastadenovirus A hexon	43835	0.0330572	0.288284	0	0	29.8507	101.777	FGG
Human mastadenovirus B hexon (gene: L3)	43835	0.0330572	0.28791	0	0	29.8507	101.777	FGG
Human mastadenovirus F hexon (gene: L3)	43835	0.0330572	0.287537	0	0	29.8507	101.777	FGG
Echovirus E12 polyprotein	3/105	0.0336185	0.292042	0	0	4.26439	14.4677	UBC;ACTB;CFB
Sosuga virus phosphoprotein	3/105	0.0336185	0.291665	0	0	4.26439	14.4677	FGB;HSPA8;UBC
Monkeypox virus Zaire-96-I-16 B3R (gene: B3R)	4/181	0.0336372	0.29145	0	0	3.29843	11.1887	HSPA8;HSP90AB1;UBC;S100A9
Yaba monkey tumor virus Ig domain OX-2-like protein	4/181	0.0336372	0.291074	0	0	3.29843	11.1887	UBB;UBC;RPL13;B2M
Japanese encephalitis virus non-structural protein NS3	2/43	0.0336432	0.290752	0	0	6.94203	23.547	AMBP;UBC
Cowpox virus CPXV202 protein (gene: CPXV202 CDS)	2/43	0.0336432	0.290378	0	0	6.94203	23.547	UBC;B2M
Macacine alphaherpesvirus 1 membrane protein UL45 (gene: UL45)	2/43	0.0336432	0.290006	0	0	6.94203	23.547	HSP90AB1;B2M
Enterovirus B111 3D	2/43	0.0336432	0.289634	0	0	6.94203	23.547	UBC;ALB
Norovirus Hu/GII/Seoul1072/KOR/2010 major capsid protein	2/43	0.0336432	0.289263	0	0	6.94203	23.547	UBC;GAPDH
Human adenovirus 3+7 fiber protein (gene: L5)	2/43	0.0336432	0.288893	0	0	6.94203	23.547	PABPC1;B2M
Human adenovirus 36 IVa2	2/43	0.0336432	0.288524	0	0	6.94203	23.547	UBC;B2M
Human adenovirus 58 IVa2 (gene: pIVa2)	2/43	0.0336432	0.288156	0	0	6.94203	23.547	UBC;B2M
Parvovirus NIH-CQV putative replication associated protein (gene: rep)	2/43	0.0336432	0.287789	0	0	6.94203	23.547	UBC;B2M
Human adenovirus B3 L5 protein IV (fiber) (gene: L5)	2/43	0.0336432	0.287423	0	0	6.94203	23.547	PABPC1;B2M
West Nile virus H442 non-structural protein 3	2/43	0.0336432	0.287058	0	0	6.94203	23.547	AMBP;UBC
West Nile virus SA381/00 non-structural protein 3	2/43	0.0336432	0.286693	0	0	6.94203	23.547	AMBP;UBC
West Nile virus SA93/01 non-structural protein 3	2/43	0.0336432	0.28633	0	0	6.94203	23.547	AMBP;UBC
West Nile virus SPU116/89 non-structural protein 3	2/43	0.0336432	0.285968	0	0	6.94203	23.547	AMBP;UBC
West Nile virus lineage 1 nonstructural protein NS3 (gene: flavivirus polyprotein)	2/43	0.0336432	0.285606	0	0	6.94203	23.547	AMBP;UBC
Human gammaherpesvirus 4 large tegument protein (gene: BPLF1)	2/43	0.0336432	0.285245	0	0	6.94203	23.547	UBC;RPS27A
Yaba monkey tumor virus 87R	2/43	0.0336432	0.284886	0	0	6.94203	23.547	UBC;B2M
Human herpesvirus 4 type 2 BPLF1	2/43	0.0336432	0.284527	0	0	6.94203	23.547	UBC;RPS27A
Human mastadenovirus B control protein E4orf1 (gene: E4)	2/43	0.0336432	0.284169	0	0	6.94203	23.547	UBC;B2M
Human papillomavirus 179 E2 protein (gene: E2)	2/43	0.0336432	0.283812	0	0	6.94203	23.547	PABPC1;B2M
Human parechovirus 4 3D	2/43	0.0336432	0.283456	0	0	6.94203	23.547	UBC;B2M
Orf virus ORF036 RNA helicase NPH-II	3/106	0.0344331	0.289747	0	0	4.22416	14.2301	HSPA8;UBC;PABPC1
Human gammaherpesvirus 4 probable membrane glycoprotein (gene: BILF2)	3/106	0.0344331	0.289385	0	0	4.22416	14.2301	C3;UBC;B2M
Human herpesvirus 4 type 2 BILF2	3/106	0.0344331	0.289023	0	0	4.22416	14.2301	C3;UBC;B2M
Norovirus Hu/GII/BG1C0004/2010/BGD capsid protein VP1 (gene: VP1)	2/44	0.0350936	0.294199	0	0	6.78426	22.7255	UBC;B2M
Norovirus Hu/Norwalk/10235/2009/VNM capsid protein VP1 (gene: VP1)	2/44	0.0350936	0.293832	0	0	6.78426	22.7255	UBC;B2M
Human adenovirus 6 unknown	2/44	0.0350936	0.293466	0	0	6.78426	22.7255	HSP90AB1;B2M
Variola virus hypothetical protein (gene: A35L)	2/44	0.0350936	0.293101	0	0	6.78426	22.7255	UBB;UBC
Human enterovirus 79 1D (VP1)	2/44	0.0350936	0.292737	0	0	6.78426	22.7255	UBC;B2M
Human parechovirus 2 full_polyprotein 1..2179	2/44	0.0350936	0.292374	0	0	6.78426	22.7255	UBC;B2M
Papiine alphaherpesvirus 2 helicase-primase helicase subunit (gene: UL5)	4/184	0.0354051	0.294604	0	0	3.24465	10.84	RPS4X;HSPA8;HSP90AB1;UBC
Human papillomavirus type 106 E2 protein	3/108	0.0360929	0.299955	0	0	4.14594	13.7714	PABPC1;EEF2;B2M
Human poliovirus 3 polyprotein	3/108	0.0360929	0.299584	0	0	4.14594	13.7714	UBC;B2M;CFB
MW polyomavirus large T antigen	2/45	0.0365678	0.303152	0	0	6.6335	21.9475	HSPA8;UBC
Echovirus E16 3D	2/45	0.0365678	0.302778	0	0	6.6335	21.9475	UBC;ALB
Norovirus Hu/GII/10037/2009/VNM capsid protein VP1 (gene: VP1)	2/45	0.0365678	0.302405	0	0	6.6335	21.9475	UBC;B2M
Norovirus Hu/GII/BG1C0066/2011/BGD capsid protein VP1 (gene: VP1)	2/45	0.0365678	0.302033	0	0	6.6335	21.9475	UBC;B2M
Norovirus Hu/GII/BG1C0282/2011/BGD capsid protein VP1 (gene: VP1)	2/45	0.0365678	0.301662	0	0	6.6335	21.9475	UBC;B2M
Human adenovirus 16 ORF1 (gene: E4)	2/45	0.0365678	0.301292	0	0	6.6335	21.9475	UBC;B2M
Norovirus Hu/Norwalk/10199/2009/VNM capsid protein VP1 (gene: VP1)	2/45	0.0365678	0.300922	0	0	6.6335	21.9475	UBC;B2M
Norovirus Hu/Norwalk/20008/2009/VNM capsid protein VP1 (gene: VP1)	2/45	0.0365678	0.300554	0	0	6.6335	21.9475	UBC;B2M
Norovirus Hu/Norwalk/20066/2009/VNM capsid protein VP1 (gene: VP1)	2/45	0.0365678	0.300187	0	0	6.6335	21.9475	UBC;B2M
Variola virus hypothetical protein (gene: B9R)	2/45	0.0365678	0.29982	0	0	6.6335	21.9475	UBC;B2M
Human enterovirus C104 3D	2/45	0.0365678	0.299455	0	0	6.6335	21.9475	UBC;ALB
Yaba-like disease virus 18L protein (gene: 18L)	2/45	0.0365678	0.29909	0	0	6.6335	21.9475	HSPA8;UBC
Human papillomavirus 105 E7 protein (gene: E7)	2/45	0.0365678	0.298726	0	0	6.6335	21.9475	UBC;B2M
Horsepox virus HSPV176 (kelch-like protein; Provisional)	4/188	0.037845	0.308784	0	0	3.17561	10.3978	HSPA8;HSP90AB1;UBC;B2M
Aichi virus 1 3D	2/46	0.0380656	0.310207	0	0	6.48929	21.2099	HSPA8;UBC
Cercopithecine alphaherpesvirus 2 large tegument protein (gene: UL36)	2/46	0.0380656	0.309831	0	0	6.48929	21.2099	UBC;RPS27A
Cyclovirus NG14 replication-association protein (gene: rep)	2/46	0.0380656	0.309455	0	0	6.48929	21.2099	UBC;B2M
Dengue virus 2 envelope protein E (gene: flavivirus polyprotein)	2/46	0.0380656	0.309081	0	0	6.48929	21.2099	UBC;B2M
Echovirus E13 3D	2/46	0.0380656	0.308708	0	0	6.48929	21.2099	UBC;ALB
Echovirus E15 VP2	2/46	0.0380656	0.308336	0	0	6.48929	21.2099	B2M;CFB
Norovirus Hu/GII-4/CGMH20/2009/TW major viral capsid protein (gene: VP1)	2/46	0.0380656	0.307964	0	0	6.48929	21.2099	UBC;B2M
Norovirus Hu/GII/20477/2010/VNM protein p48 (gene: POL)	2/46	0.0380656	0.307594	0	0	6.48929	21.2099	HSP90AB1;B2M
Norovirus Hu/GII/20477/2010/VNM capsid protein VP1 (gene: VP1)	2/46	0.0380656	0.307224	0	0	6.48929	21.2099	UBC;B2M
Norovirus Hu/Norwalk/10148/2009/VNM protein p48 (gene: POL)	2/46	0.0380656	0.306855	0	0	6.48929	21.2099	HSP90AB1;UBC
Norovirus Hu/Norwalk/10176/2009/VNM capsid protein VP1 (gene: VP1)	2/46	0.0380656	0.306487	0	0	6.48929	21.2099	UBC;B2M
Norovirus Hu/Norwalk/10183/2009/VNM protein p48 (gene: POL)	2/46	0.0380656	0.30612	0	0	6.48929	21.2099	HSP90AB1;B2M
Norovirus Hu/Norwalk/10255/2009/VNM protein p48 (gene: POL)	2/46	0.0380656	0.305754	0	0	6.48929	21.2099	HSP90AB1;B2M
Norovirus Hu/Norwalk/10285/2010/VNM protein p48 (gene: POL)	2/46	0.0380656	0.305389	0	0	6.48929	21.2099	HSP90AB1;B2M
Norovirus Hu/Norwalk/10325/2010/VNM protein p48 (gene: POL)	2/46	0.0380656	0.305024	0	0	6.48929	21.2099	HSP90AB1;B2M
Norovirus Hu/Norwalk/10368/2010/VNM protein p48 (gene: POL)	2/46	0.0380656	0.304661	0	0	6.48929	21.2099	HSP90AB1;B2M
Norovirus Hu/Norwalk/10386/2010/VNM protein p48 (gene: POL)	2/46	0.0380656	0.304298	0	0	6.48929	21.2099	HSP90AB1;B2M
Human adenovirus 43 encapsidation protein IVa2 (gene: IVa2)	2/46	0.0380656	0.303936	0	0	6.48929	21.2099	UBC;B2M
Human betaherpesvirus 5 membrane protein UL14 (gene: UL14)	2/46	0.0380656	0.303575	0	0	6.48929	21.2099	UBC;B2M
West Nile virus lineage 2 nonstructural protein NS3 (gene: flavivirus polyprotein)	2/46	0.0380656	0.303215	0	0	6.48929	21.2099	AMBP;UBC
Human immunodeficiency virus 1 Envelope transmembrane domain (gene: env)	2/46	0.0380656	0.302856	0	0	6.48929	21.2099	UBC;B2M
Human papillomavirus type 68b E2 protein (gene: E2)	3/111	0.0386586	0.30721	0	0	4.03388	13.1222	PABPC1;EEF2;B2M
Louping ill virus membrane protein	43836	0.0395373	0.313821	0	0	24.8756	80.361	UBC
Norovirus Hu/GII.6/CHDC4073/1984/USA RNA-directed RNA polymerase (gene: POL)	43836	0.0395373	0.313451	0	0	24.8756	80.361	UBC
Human adenovirus 16 DNA polymerase (gene: E2B)	43836	0.0395373	0.313081	0	0	24.8756	80.361	UBC
Powassan virus matrix protein M	43836	0.0395373	0.312712	0	0	24.8756	80.361	UBC
Human adenovirus 68 DNA polymerase (gene: E2B)	43836	0.0395373	0.312345	0	0	24.8756	80.361	UBC
Human adenovirus 7d2 DNA polymerase (gene: E2B)	43836	0.0395373	0.311977	0	0	24.8756	80.361	UBC
Rio Bravo virus matrix protein M	43836	0.0395373	0.311611	0	0	24.8756	80.361	UBC
Human alphaherpesvirus 1 multifunctional expression regulator (gene: UL54)	43836	0.0395373	0.311246	0	0	24.8756	80.361	HSPA8
Human betaherpesvirus 6 U27, pp41, transactivator, pol processivity factor (gene: U27)	43836	0.0395373	0.310882	0	0	24.8756	80.361	UBC
Human gammaherpesvirus 4 ribonucleoside-diphosphate reductase large chain (gene: BORF2)	43836	0.0395373	0.310518	0	0	24.8756	80.361	UBC
Human herpesvirus 4 type 2 BORF2	43836	0.0395373	0.310155	0	0	24.8756	80.361	UBC
Cowpox virus CPXV069 protein (gene: CPXV069 CDS)	2/47	0.0395865	0.310179	0	0	6.35122	20.5098	HSPA8;UBC
MX polyomavirus large T-antigen	2/47	0.0395865	0.309817	0	0	6.35122	20.5098	HSPA8;UBC
Echovirus E12 polymerase, polyprotein region 11	2/47	0.0395865	0.309457	0	0	6.35122	20.5098	UBC;ALB
Norovirus Hu/Norwalk/10148/2009/VNM capsid protein VP1 (gene: VP1)	2/47	0.0395865	0.309097	0	0	6.35122	20.5098	UBC;B2M
Human adenovirus 36 E4 ORF1	2/47	0.0395865	0.308738	0	0	6.35122	20.5098	UBC;B2M
Human adenovirus 52 IVa2 (gene: IVa2)	2/47	0.0395865	0.30838	0	0	6.35122	20.5098	UBC;B2M
Variola virus hypothetical protein (gene: N1L)	2/47	0.0395865	0.308022	0	0	6.35122	20.5098	HSPA8;UBC
Human polyomavirus 10 large T Antigen	2/47	0.0395865	0.307666	0	0	6.35122	20.5098	HSPA8;UBC
Vaccinia virus hemagglutinin (gene: A56R)	8/576	0.0402106	0.312155	0	0	2.07297	6.66174	UBB;AMBP;UBC;RPL13;MT-CO2;MT-CO3;RPS27A;B2M
Norovirus GII/Hu/JP/2007/GII.P7_GII.14/Fukuoka/KK282 full_polyprotein 1..1697	2/48	0.0411302	0.318925	0	0	6.21891	19.8446	HSP90AB1;B2M
Norovirus Hu/GII.12/HS210/2010/USA full_polyprotein 1..1701	2/48	0.0411302	0.318557	0	0	6.21891	19.8446	HSP90AB1;B2M
Norovirus Hu/GII.4/Caringbah/NSW409G/2011/AU full_polyprotein 1..1699	2/48	0.0411302	0.31819	0	0	6.21891	19.8446	HSP90AB1;B2M
Norovirus Hu/GII/BG1C0204/2011/BGD capsid protein VP1 (gene: VP1)	2/48	0.0411302	0.317824	0	0	6.21891	19.8446	UBC;B2M
Norovirus Hu/GII/BG1C0270/2011/BGD capsid protein VP1 (gene: VP1)	2/48	0.0411302	0.317459	0	0	6.21891	19.8446	UBC;B2M
Norovirus Hu/GII/BG1C0317/2011/BGD capsid protein VP1 (gene: VP1)	2/48	0.0411302	0.317094	0	0	6.21891	19.8446	UBC;B2M
Human adenovirus 28 E3 44.5K-like protein (gene: E3)	2/48	0.0411302	0.316731	0	0	6.21891	19.8446	UBC;B2M
Norovirus Hu/Norwalk/20094/2009/VNM capsid protein VP1 (gene: VP1)	2/48	0.0411302	0.316368	0	0	6.21891	19.8446	UBC;B2M
Pichinde mammarenavirus L polymerase (gene: L)	2/48	0.0411302	0.316006	0	0	6.21891	19.8446	HSPA8;UBC
Human enterovirus C104 VP1	2/48	0.0411302	0.315645	0	0	6.21891	19.8446	UBC;B2M
Yaba monkey tumor virus 84R	2/48	0.0411302	0.315284	0	0	6.21891	19.8446	HSPA8;UBC
Yellow fever virus non-structural protein NS3	2/48	0.0411302	0.314925	0	0	6.21891	19.8446	AMBP;B2M
Human papillomavirus type 16 transforming protein (gene: E7)	2/48	0.0411302	0.314566	0	0	6.21891	19.8446	UBC;B2M
Echovirus E30 full_polyprotein 1..2194	3/115	0.0422204	0.322537	0	0	3.89358	12.3226	UBC;ACTB;CFB
Influenza A virus (A/goose/Guangdong/1/1996(H5N1)) matrix protein 1 (gene: M1)	2/49	0.0426963	0.325802	0	0	6.09199	19.212	HSPA8;B2M
Monkeypox virus Zaire-96-I-16 E10R (gene: E10R)	2/49	0.0426963	0.325432	0	0	6.09199	19.212	UBC;B2M
Ectromelia virus ERPV cd47-like protein	2/49	0.0426963	0.325063	0	0	6.09199	19.212	UBC;B2M
Norovirus GII/Hu/JP/2007/GII.P7_GII.14/Sendai/YG99 full_polyprotein 1..1697	2/49	0.0426963	0.324695	0	0	6.09199	19.212	HSP90AB1;B2M
Norovirus GII/Hu/JP/2011/GII/Yuzawa/Gira2HS full_polyprotein 1..1693	2/49	0.0426963	0.324328	0	0	6.09199	19.212	HSP90AB1;B2M
Enterovirus H capsid protein VP2	2/49	0.0426963	0.323961	0	0	6.09199	19.212	B2M;CFB
Norovirus Hu/Norwalk/10137/2009/VNM capsid protein VP1 (gene: VP1)	2/49	0.0426963	0.323595	0	0	6.09199	19.212	UBC;B2M
Norovirus Hu/Norwalk/10223/2009/VNM capsid protein VP1 (gene: VP1)	2/49	0.0426963	0.323231	0	0	6.09199	19.212	UBC;B2M
Norovirus Hu/Norwalk/20044/2009/VNM capsid protein VP1 (gene: VP1)	2/49	0.0426963	0.322867	0	0	6.09199	19.212	UBC;B2M
Norovirus Hu/Norwalk/20047/2009/VNM protein p48 (gene: POL)	2/49	0.0426963	0.322503	0	0	6.09199	19.212	HSP90AB1;B2M
Human enterovirus C117 VP1	2/49	0.0426963	0.322141	0	0	6.09199	19.212	UBC;B2M
Coxsackievirus B6 full_polyprotein 1..2184	3/116	0.0431358	0.325092	0	0	3.86001	12.1336	UBC;B2M;CFB
Influenza A virus (A/Shanghai/02/2013(H7N9)) PB1-F2 protein (gene: PB1-F2)	2/50	0.0442845	0.333375	0	0	5.97015	18.6097	UBC;APOA1
Norovirus GII/Hu/JP/2002/GII.P12_GII.13/Saitama/T80 full_polyprotein 1..1699	2/50	0.0442845	0.333001	0	0	5.97015	18.6097	HSP90AB1;B2M
Hepatitis B virus pre-capsid protein (gene: C)	2/50	0.0442845	0.332629	0	0	5.97015	18.6097	HSPA8;UBC
Norovirus Hu/Norwalk/10313/2010/VNM protein p48 (gene: POL)	2/50	0.0442845	0.332257	0	0	5.97015	18.6097	HSP90AB1;B2M
Norovirus Hu/Norwalk/10378/2010/VNM protein p48 (gene: POL)	2/50	0.0442845	0.331886	0	0	5.97015	18.6097	HSP90AB1;B2M
Snow Mountain virus full_polyprotein 1..1699 (gene: ORF1)	2/50	0.0442845	0.331516	0	0	5.97015	18.6097	HSP90AB1;B2M
Vaccinia virus Ankara intermediate gene transcription factor VITF-1	2/50	0.0442845	0.331147	0	0	5.97015	18.6097	HSP90AB1;B2M
Variola virus hypothetical protein (gene: B12R)	2/50	0.0442845	0.330779	0	0	5.97015	18.6097	HSPA8;UBC
Coxsackievirus B2 full_polyprotein 1..2187	3/118	0.0449963	0.335723	0	0	3.79459	11.7677	UBC;B2M;CFB
Monkeypox virus Zaire-96-I-16 B11R (gene: B11R)	3/118	0.0449963	0.33535	0	0	3.79459	11.7677	HSPA8;HSP90AB1;UBC
Human papillomavirus type 43 E2 protein (gene: E2)	3/118	0.0449963	0.334978	0	0	3.79459	11.7677	PABPC1;EEF2;B2M
Vaccinia virus kelch-like protein (gene: A55R)	4/199	0.0450422	0.334948	0	0	3.00008	9.3007	HSPA8;HSP90AB1;UBC;B2M
Coxsackievirus A22 3d	2/51	0.0458943	0.340907	0	0	5.85309	18.0358	UBC;ALB
Echovirus E20 VP2	2/51	0.0458943	0.340531	0	0	5.85309	18.0358	B2M;CFB
Enterovirus C109 3D	2/51	0.0458943	0.340155	0	0	5.85309	18.0358	UBC;ALB
Horsepox virus HSPV060 (double-strand RNA-binding protein; Provisional)	2/51	0.0458943	0.33978	0	0	5.85309	18.0358	HSPA8;UBC
Horsepox virus HSPV167 (E-class dimer interface [polypeptide binding])	2/51	0.0458943	0.339406	0	0	5.85309	18.0358	UBC;B2M
Norovirus Hu/GII.6/GZ2010-L96/Guangzhou/CHN/2011 full_polyprotein 1..1697	2/51	0.0458943	0.339032	0	0	5.85309	18.0358	HSP90AB1;B2M
Norovirus Hu/GII/20469/2010/VNM protein p48 (gene: POL)	2/51	0.0458943	0.33866	0	0	5.85309	18.0358	HSP90AB1;B2M
Norovirus Hu/Norwalk/10074/2009/VNM capsid protein VP1 (gene: VP1)	2/51	0.0458943	0.338288	0	0	5.85309	18.0358	UBC;B2M
Norovirus Hu/Norwalk/10162/2009/VNM capsid protein VP1 (gene: VP1)	2/51	0.0458943	0.337917	0	0	5.85309	18.0358	UBC;B2M
Norovirus Hu/Norwalk/10173/2009/VNM capsid protein VP1 (gene: VP1)	2/51	0.0458943	0.337547	0	0	5.85309	18.0358	UBC;B2M
Norovirus Hu/Norwalk/20016/2009/VNM capsid protein VP1 (gene: VP1)	2/51	0.0458943	0.337178	0	0	5.85309	18.0358	UBC;B2M
Norovirus Hu/Norwalk/20035/2009/VNM capsid protein VP1 (gene: VP1)	2/51	0.0458943	0.336809	0	0	5.85309	18.0358	UBC;B2M
Norovirus Hu/Norwalk/20047/2009/VNM capsid protein VP1 (gene: VP1)	2/51	0.0458943	0.336441	0	0	5.85309	18.0358	UBC;B2M
Orf virus ORF069 early transcription factor VETFs	2/51	0.0458943	0.336074	0	0	5.85309	18.0358	HSPA8;PABPC1
Human betaherpesvirus 6 U12, GCR (gene: U12)	2/51	0.0458943	0.335708	0	0	5.85309	18.0358	HSPA8;UBC
Human enteric coronavirus 4408 full_polyprotein 1..7094	2/51	0.0458943	0.335343	0	0	5.85309	18.0358	HSPA8;UBC
WU Polyomavirus large T antigen	2/51	0.0458943	0.334979	0	0	5.85309	18.0358	HSPA8;UBC
Alkhumra hemorrhagic fever virus matrix protein M	43837	0.0459743	0.335198	0	0	21.322	65.6647	UBC
Middle East respiratory syndrome-related coronavirus nsp1 protein (gene: orf1ab)	43837	0.0459743	0.334834	0	0	21.322	65.6647	UBB
Human adenovirus 31 DNA polymerase (gene: dna pol)	43837	0.0459743	0.334472	0	0	21.322	65.6647	UBC
West Nile virus lineage 2 nonstructural protein NS2B (gene: flavivirus polyprotein)	43837	0.0459743	0.33411	0	0	21.322	65.6647	B2M
Human gammaherpesvirus 8 ORF61 (gene: ORF61)	43837	0.0459743	0.333749	0	0	21.322	65.6647	UBC
Human rhinovirus A68 3D	43837	0.0459743	0.333388	0	0	21.322	65.6647	UBC
Merkel cell polyomavirus large T antigen	2/52	0.0475255	0.344265	0	0	5.74053	17.4885	HSPA8;UBC
Echovirus E33 VP2	2/52	0.0475255	0.343894	0	0	5.74053	17.4885	B2M;CFB
Norovirus GII/Hu/JP/2010/GII.P4_GII.4/Shimada/ASC96 VP1 (gene: VP1)	2/52	0.0475255	0.343524	0	0	5.74053	17.4885	UBC;B2M
Enterovirus C109 VP1	2/52	0.0475255	0.343154	0	0	5.74053	17.4885	UBC;B2M
Norovirus Hu/GII-4/CBNU2/2007/KR capsid protein	2/52	0.0475255	0.342786	0	0	5.74053	17.4885	UBC;B2M
HBV genotype D HBeAg (gene: PreC/C)	2/52	0.0475255	0.342418	0	0	5.74053	17.4885	HSPA8;UBC
Norovirus Hu/GII.4/Berowra/NSW767L/2012/AU VP1	2/52	0.0475255	0.342051	0	0	5.74053	17.4885	UBC;B2M
Norovirus Hu/GII.4/JB-15/KOR/2008 full_polyprotein 1..1699	2/52	0.0475255	0.341685	0	0	5.74053	17.4885	HSP90AB1;B2M
Norovirus Hu/GII.4/NIHIC11.3/2013/USA capsid protein VP1 (gene: VP1)	2/52	0.0475255	0.341319	0	0	5.74053	17.4885	UBC;B2M
Norovirus Hu/GII.4/New Orleans/2010/USA full_polyprotein 1..1699	2/52	0.0475255	0.340955	0	0	5.74053	17.4885	HSP90AB1;B2M
Norovirus Hu/Norwalk/10247/2009/VNM capsid protein VP1 (gene: VP1)	2/52	0.0475255	0.340591	0	0	5.74053	17.4885	UBC;B2M
Norovirus Hu/Norwalk/10328/2010/VNM protein p48 (gene: POL)	2/52	0.0475255	0.340228	0	0	5.74053	17.4885	HSP90AB1;B2M
Human betaherpesvirus 6 U45 (gene: U45)	2/52	0.0475255	0.339865	0	0	5.74053	17.4885	MYH9;B2M
Human betaherpesvirus 6A deoxyuridine triphosphatase (gene: U45)	2/52	0.0475255	0.339504	0	0	5.74053	17.4885	MYH9;B2M
Vaccinia virus Ankara EEV type 1 membrane protein	2/52	0.0475255	0.339143	0	0	5.74053	17.4885	UBC;B2M
Human mastadenovirus B fiber (gene: L5)	2/52	0.0475255	0.338783	0	0	5.74053	17.4885	PABPC1;B2M
Coxsackievirus A1 3D	2/53	0.0491777	0.350189	0	0	5.63222	16.966	UBC;ALB
Echovirus E21 VP2	2/53	0.0491777	0.349818	0	0	5.63222	16.966	B2M;CFB
Enterovirus B111 VP2	2/53	0.0491777	0.349448	0	0	5.63222	16.966	B2M;CFB
Norovirus Hu/GII-4/CGMH13/2007/TW major viral capsid protein (gene: VP1)	2/53	0.0491777	0.349078	0	0	5.63222	16.966	UBC;B2M
Norovirus Hu/GII.12/CGMH40/2010/TW ORF1	2/53	0.0491777	0.34871	0	0	5.63222	16.966	HSP90AB1;B2M
Norovirus Hu/GII.4/CHDC4108/1987/US VP1	2/53	0.0491777	0.348342	0	0	5.63222	16.966	UBC;B2M
Human T-lymphotropic virus 3 envelope (gene: env)	2/53	0.0491777	0.347975	0	0	5.63222	16.966	FGG;UBC
Norovirus Hu/GII/Seoul1488/KOR/2011 nonstructural protein	2/53	0.0491777	0.347608	0	0	5.63222	16.966	HSP90AB1;B2M
Norovirus Hu/Norwalk/10051/2009/VNM capsid protein VP1 (gene: VP1)	2/53	0.0491777	0.347243	0	0	5.63222	16.966	UBC;B2M
Norovirus Hu/Norwalk/10116/2009/VNM capsid protein VP1 (gene: VP1)	2/53	0.0491777	0.346878	0	0	5.63222	16.966	UBC;B2M
Norovirus Hu/Norwalk/10183/2009/VNM capsid protein VP1 (gene: VP1)	2/53	0.0491777	0.346514	0	0	5.63222	16.966	UBC;B2M
Norovirus Hu/Norwalk/10236/2009/VNM capsid protein VP1 (gene: VP1)	2/53	0.0491777	0.346151	0	0	5.63222	16.966	UBC;B2M
Vaccinia virus Ankara sulfhydryl oxidase	2/53	0.0491777	0.345788	0	0	5.63222	16.966	UBC;ALB
Human betaherpesvirus 6B putative dUTPase (gene: U45)	2/53	0.0491777	0.345427	0	0	5.63222	16.966	MYH9;B2M
Human enteric coronavirus strain 4408 full_polyprotein 1..7094	2/53	0.0491777	0.345066	0	0	5.63222	16.966	HSPA8;UBC
Human papillomavirus type 56 envelope protein (gene: E7)	2/53	0.0491777	0.344706	0	0	5.63222	16.966	UBC;B2M
Human papillomavirus type 102 E2 protein	3/123	0.0498196	0.348841	0	0	3.64033	10.9186	PABPC1;EEF2;B2M
Influenza A virus (A/California/04/2009(H1N1)) matrix protein 1 (gene: M1)	2/54	0.0508504	0.355688	0	0	5.52792	16.4669	HSPA8;UBC
Lordsdale virus capsid protein (gene: orf2)	2/54	0.0508504	0.355318	0	0	5.52792	16.4669	UBC;B2M
Molluscum contagiosum virus subtype 1 MC039L (gene: MC039L)	2/54	0.0508504	0.354949	0	0	5.52792	16.4669	UBC;B2M
Monkeypox virus sulfhydryl oxidase	2/54	0.0508504	0.35458	0	0	5.52792	16.4669	UBC;ALB
Echovirus E25 VP2	2/54	0.0508504	0.354212	0	0	5.52792	16.4669	B2M;CFB
Echovirus E6 VP2	2/54	0.0508504	0.353845	0	0	5.52792	16.4669	B2M;CFB
Enterovirus B97 VP2	2/54	0.0508504	0.353479	0	0	5.52792	16.4669	B2M;CFB
Norovirus GII/Hu/TW/2012/GII.Pe_GII.4_Sydney2012/Taipei/108 VP1 (gene: VP1)	2/54	0.0508504	0.353113	0	0	5.52792	16.4669	UBC;B2M
Norovirus GII/Hu/TW/2012/GII.Pe_GII.4_Sydney2012/Taipei/109 VP1 (gene: VP1)	2/54	0.0508504	0.352749	0	0	5.52792	16.4669	UBC;B2M
HBV genotype H PC/C protein (gene: PC/C)	2/54	0.0508504	0.352385	0	0	5.52792	16.4669	HSPA8;UBC
Norovirus Hu/GII-4/CGMH23/2010/TW major viral capsid protein (gene: VP1)	2/54	0.0508504	0.352021	0	0	5.52792	16.4669	UBC;B2M
Norovirus Hu/GII-4/CGMH26/2010/TW major viral capsid protein (gene: VP1)	2/54	0.0508504	0.351659	0	0	5.52792	16.4669	UBC;B2M
Norovirus Hu/GII-4/CUK-3/2008/KR capsid protein	2/54	0.0508504	0.351297	0	0	5.52792	16.4669	UBC;B2M
Norovirus Hu/GII.12/CGMH39/2010/TW ORF1	2/54	0.0508504	0.350936	0	0	5.52792	16.4669	HSP90AB1;B2M
Norovirus Hu/GII.4/CHDC3967/1988/US VP1	2/54	0.0508504	0.350576	0	0	5.52792	16.4669	UBC;B2M
Norovirus Hu/GII.4/GZ2010-L87/Guangzhou/CHN/2011 major viral capsid protein (gene: VP1)	2/54	0.0508504	0.350216	0	0	5.52792	16.4669	UBC;B2M
Human adenovirus 12 maturation protein (protein IVA2)	2/54	0.0508504	0.349857	0	0	5.52792	16.4669	UBC;B2M
Norovirus Hu/GII/Seoul1282/KOR/2010 nonstructural protein	2/54	0.0508504	0.349499	0	0	5.52792	16.4669	HSP90AB1;B2M
Norovirus Hu/Norwalk/10368/2010/VNM capsid protein VP1 (gene: VP1)	2/54	0.0508504	0.349142	0	0	5.52792	16.4669	UBC;B2M
Salivirus FHB full_polyprotein 1..2365	2/54	0.0508504	0.348785	0	0	5.52792	16.4669	UBC;B2M
Human calicivirus Hu/NLV/GII/MD145-12/1987/US capsid protein	2/54	0.0508504	0.348429	0	0	5.52792	16.4669	UBC;B2M
Variola virus sulfhydryl oxidase (gene: E10R)	2/54	0.0508504	0.348074	0	0	5.52792	16.4669	UBC;RPL13
Yaba monkey tumor virus DNA polymerase	2/54	0.0508504	0.34772	0	0	5.52792	16.4669	UBC;B2M
Human mastadenovirus A encapsidation protein IVa2 (gene: IVa2)	2/54	0.0508504	0.347366	0	0	5.52792	16.4669	UBC;B2M
Human papillomavirus 152 early protein E7 (gene: E7)	2/54	0.0508504	0.347013	0	0	5.52792	16.4669	UBC;B2M
Human papillomavirus type 101 E2 protein	2/54	0.0508504	0.346661	0	0	5.52792	16.4669	PABPC1;B2M
Human adenovirus 31 cr1 beta protein (gene: E3 cr1 beta)	8/607	0.0517967	0.352753	0	0	1.9671	5.82346	UBB;UBC;ALB;MYH9;RPL13;MT-CO2;B2M;GAPDH
Influenza A virus (A/New York/602/1996(H3N2)) matrix protein 1 (gene: M1)	3/125	0.0518169	0.352533	0	0	3.58209	10.6031	HSPA8;RPL13;B2M
Influenza A virus (A/Northern Territory/60/1968(H3N2)) matrix protein 1 (gene: M1)	3/125	0.0518169	0.352177	0	0	3.58209	10.6031	HSPA8;RPL13;B2M
Human papillomavirus type 40 early protein (gene: E2)	3/125	0.0518169	0.351821	0	0	3.58209	10.6031	EEF1G;PABPC1;B2M
Human alphaherpesvirus 2 envelope glycoprotein C (gene: UL44)	4/209	0.0522052	0.354099	0	0	2.85653	8.43412	UBB;UBC;ALB;B2M
KI polyomavirus Stockholm 350 small T antigen	43838	0.0523685	0.354848	0	0	18.6567	55.0271	UBC
Human betaherpesvirus 7 DNA polymerase processivity subunit (gene: U27)	43838	0.0523685	0.35449	0	0	18.6567	55.0271	UBC
Human parechovirus 6 2A	43838	0.0523685	0.354133	0	0	18.6567	55.0271	B2M
Molluscum contagiosum virus subtype 1 MC157R (gene: MC157R)	2/55	0.0525435	0.35496	0	0	5.42741	15.9898	UBC;B2M
Echovirus E13 VP2	2/55	0.0525435	0.354603	0	0	5.42741	15.9898	B2M;CFB
Echovirus E3 VP2	2/55	0.0525435	0.354247	0	0	5.42741	15.9898	B2M;CFB
Norovirus Hu/GII-4/CGMH02/2006/TW major viral capsid protein (gene: VP1)	2/55	0.0525435	0.353891	0	0	5.42741	15.9898	UBC;B2M
Norovirus Hu/GII-4/CGMH03/2006/TW major viral capsid protein (gene: VP1)	2/55	0.0525435	0.353537	0	0	5.42741	15.9898	UBC;B2M
Norovirus Hu/GII-4/CGMH04/2006/TW major viral capsid protein (gene: VP1)	2/55	0.0525435	0.353183	0	0	5.42741	15.9898	UBC;B2M
Norovirus Hu/GII-4/CGMH06/2006/TW major viral capsid protein	2/55	0.0525435	0.35283	0	0	5.42741	15.9898	UBC;B2M
Norovirus Hu/GII-4/CGMH07/2006/TW major viral capsid protein (gene: VP1)	2/55	0.0525435	0.352477	0	0	5.42741	15.9898	UBC;B2M
Norovirus Hu/GII-4/CGMH09/2006/TW major viral capsid protein (gene: VP1)	2/55	0.0525435	0.352125	0	0	5.42741	15.9898	UBC;B2M
Norovirus Hu/GII-4/CGMH12/2007/TW major viral capsid protein (gene: VP1)	2/55	0.0525435	0.351774	0	0	5.42741	15.9898	UBC;B2M
Norovirus Hu/GII-4/CGMH17/2007/TW major viral capsid protein (gene: VP1)	2/55	0.0525435	0.351424	0	0	5.42741	15.9898	UBC;B2M
Norovirus Hu/GII-4/CGMH21/2010/TW major viral capsid protein (gene: VP1)	2/55	0.0525435	0.351074	0	0	5.42741	15.9898	UBC;B2M
Norovirus Hu/GII-4/CGMH24/2010/TW major viral capsid protein (gene: VP1)	2/55	0.0525435	0.350725	0	0	5.42741	15.9898	UBC;B2M
Norovirus Hu/GII-4/CGMH25/2010/TW major viral capsid protein (gene: VP1)	2/55	0.0525435	0.350377	0	0	5.42741	15.9898	UBC;B2M
Norovirus Hu/GII-4/CGMH27/2010/TW major viral capsid protein (gene: VP1)	2/55	0.0525435	0.35003	0	0	5.42741	15.9898	UBC;B2M
Norovirus Hu/GII.4/Caringbah/NSW409G/2011/AU VP1	2/55	0.0525435	0.349683	0	0	5.42741	15.9898	UBC;B2M
Norovirus Hu/GII.4/HS292/2012/USA capsid protein VP1 (gene: VP1)	2/55	0.0525435	0.349336	0	0	5.42741	15.9898	UBC;B2M
Norovirus Hu/GII.4/NIHIC13/2011/USA capsid protein VP1 (gene: VP1)	2/55	0.0525435	0.348991	0	0	5.42741	15.9898	UBC;B2M
Norovirus Hu/GII.4/NIHIC18.1/2012/USA capsid protein VP1 (gene: VP1)	2/55	0.0525435	0.348646	0	0	5.42741	15.9898	UBC;B2M
Norovirus Hu/GII.4/NIHIC27.1/2012/USA capsid protein VP1 (gene: VP1)	2/55	0.0525435	0.348302	0	0	5.42741	15.9898	UBC;B2M
Norovirus Hu/GII.4/New Orleans/2010/USA VP1	2/55	0.0525435	0.347958	0	0	5.42741	15.9898	UBC;B2M
Norovirus Hu/GII.4/SGU-110421/KOR/2011 VP1	2/55	0.0525435	0.347616	0	0	5.42741	15.9898	UBC;B2M
Norovirus Hu/GII.4/Seoul/1071/2010/KOR full_polyprotein 1..1699	2/55	0.0525435	0.347273	0	0	5.42741	15.9898	HSP90AB1;B2M
Norovirus Hu/GII.4/Sydney/NSW0514/2012/AU VP1	2/55	0.0525435	0.346932	0	0	5.42741	15.9898	UBC;B2M
Norovirus Hu/GII/20469/2010/VNM capsid protein VP1 (gene: VP1)	2/55	0.0525435	0.346591	0	0	5.42741	15.9898	UBC;B2M
Norovirus Hu/GII/BG1C0241-33/2011/BGD capsid protein VP1 (gene: VP1)	2/55	0.0525435	0.346251	0	0	5.42741	15.9898	UBC;B2M
Norovirus Hu/GII/Seoul1282/KOR/2010 major capsid protein	2/55	0.0525435	0.345912	0	0	5.42741	15.9898	UBC;B2M
Norovirus Hu/GII/Seoul1488/KOR/2011 major capsid protein	2/55	0.0525435	0.345573	0	0	5.42741	15.9898	UBC;B2M
Norovirus Hu/Norwalk/10325/2010/VNM capsid protein VP1 (gene: VP1)	2/55	0.0525435	0.345235	0	0	5.42741	15.9898	UBC;B2M
Norovirus Hu/Norwalk/10386/2010/VNM capsid protein VP1 (gene: VP1)	2/55	0.0525435	0.344897	0	0	5.42741	15.9898	UBC;B2M
Human adenovirus 7 IVa2	2/55	0.0525435	0.34456	0	0	5.42741	15.9898	UBB;UBC
Vaccinia virus CD47-like putative membrane protein (gene: A38L)	2/55	0.0525435	0.344224	0	0	5.42741	15.9898	UBC;B2M
Human cosavirus B VP2	2/55	0.0525435	0.343889	0	0	5.42741	15.9898	UBC;CFB
Yaba-like disease virus 110R protein (gene: 110R)	2/55	0.0525435	0.343554	0	0	5.42741	15.9898	UBC;PABPC1
Human papillomavirus type 118 E2	2/55	0.0525435	0.34322	0	0	5.42741	15.9898	HSP90AB1;B2M
Influenza A virus (A/Korea/426/1968(H2N2)) membrane protein M1 (gene: M1)	3/126	0.05283	0.344755	0	0	3.55366	10.4502	HSPA8;RPL13;B2M
Horsepox virus HSPV155 (IEV and EEV membrane glycoprotein; Provisional)	3/127	0.0538526	0.351087	0	0	3.52568	10.3003	HSP90AB1;PABPC1;B2M
Yaba-like disease virus 136R protein (gene: 136R)	3/127	0.0538526	0.350747	0	0	3.52568	10.3003	UBC;MYH9;B2M
Human papillomavirus type 81 E2 protein (gene: E2)	3/127	0.0538526	0.350407	0	0	3.52568	10.3003	PABPC1;EEF2;B2M
Ectromelia virus ERPV EEV complement control protein	2/56	0.0542565	0.352694	0	0	5.33049	15.5332	UBC;B2M
Ectromelia virus ERPV DNA polymerase	2/56	0.0542565	0.352353	0	0	5.33049	15.5332	UBC;B2M
Norovirus GII/Hu/JP/2012/GII.Pe_GII.4_Sydney2012/Fukuyama/1 VP1 (gene: VP1)	2/56	0.0542565	0.352012	0	0	5.33049	15.5332	UBC;B2M
Norovirus GII/Hu/JP/2012/GII.Pe_GII.4_Sydney2012/Fukuyama/2 VP1 (gene: VP1)	2/56	0.0542565	0.351672	0	0	5.33049	15.5332	UBC;B2M
Norovirus GII/Hu/JP/2012/GII.Pe_GII.4_Sydney2012/Fukuyama/3 VP1 (gene: VP1)	2/56	0.0542565	0.351333	0	0	5.33049	15.5332	UBC;B2M
Norovirus GII/Hu/JP/2012/GII.Pe_GII.4_Sydney2012/Fukuyama/5 VP1 (gene: VP1)	2/56	0.0542565	0.350995	0	0	5.33049	15.5332	UBC;B2M
Norovirus Hu/GII-4/CGMH05/2006/TW major viral capsid protein (gene: VP1)	2/56	0.0542565	0.350657	0	0	5.33049	15.5332	UBC;B2M
Norovirus Hu/GII-4/CGMH08/2006/TW major viral capsid protein (gene: VP1)	2/56	0.0542565	0.35032	0	0	5.33049	15.5332	UBC;B2M
Norovirus Hu/GII-4/CGMH16/2007/TW major viral capsid protein (gene: VP1)	2/56	0.0542565	0.349983	0	0	5.33049	15.5332	UBC;B2M
Hepatitis C virus subtype 2m full_polyprotein 1..3034	2/56	0.0542565	0.349647	0	0	5.33049	15.5332	HSP90AB1;B2M
Norovirus Hu/GII.4/Doonside/NSW536I/2011/AU VP1	2/56	0.0542565	0.349312	0	0	5.33049	15.5332	UBC;B2M
Norovirus Hu/GII.4/GZ2010-L26/Guangzhou/CHN/2010 major viral capsid protein (gene: VP1)	2/56	0.0542565	0.348978	0	0	5.33049	15.5332	UBC;B2M
Norovirus Hu/GII.4/Hong Kong/CUHK3630/2012/CHN VP1	2/56	0.0542565	0.348644	0	0	5.33049	15.5332	UBC;B2M
Norovirus Hu/GII.4/Jiangsu1/2011/CHN major capsid protein	2/56	0.0542565	0.34831	0	0	5.33049	15.5332	UBC;B2M
Norovirus Hu/GII.4/NIHIC27.2/2012/USA capsid protein VP1 (gene: VP1)	2/56	0.0542565	0.347978	0	0	5.33049	15.5332	UBC;B2M
Horsepox virus HSPV185 (Interferon gamma receptor IFNGR1)	2/56	0.0542565	0.347646	0	0	5.33049	15.5332	UBC;B2M
Norovirus Hu/GII/Shanghai/SH2/2008/CHN VP1	2/56	0.0542565	0.347314	0	0	5.33049	15.5332	UBC;B2M
Norovirus Hu/Norwalk/10285/2010/VNM capsid protein VP1 (gene: VP1)	2/56	0.0542565	0.346983	0	0	5.33049	15.5332	UBC;B2M
Norovirus Hu/Norwalk/10313/2010/VNM capsid protein VP1 (gene: VP1)	2/56	0.0542565	0.346653	0	0	5.33049	15.5332	UBC;B2M
Norovirus Hu/Norwalk/10378/2010/VNM capsid protein VP1 (gene: VP1)	2/56	0.0542565	0.346324	0	0	5.33049	15.5332	UBC;B2M
Norovirus Hu/Shanghai/SH5/2009/CHN VP1	2/56	0.0542565	0.345995	0	0	5.33049	15.5332	UBC;B2M
Human papillomavirus 105 E2 protein (gene: E2)	2/56	0.0542565	0.345667	0	0	5.33049	15.5332	UBC;B2M
Human papillomavirus type 14D early protein (gene: E2)	2/56	0.0542565	0.345339	0	0	5.33049	15.5332	EEF1G;B2M
Human polyomavirus 7 large T antigen	2/56	0.0542565	0.345012	0	0	5.33049	15.5332	HSPA8;UBC
Human papillomavirus type 68 E2 (gene: E2)	3/129	0.0559263	0.355293	0	0	3.47102	10.0094	PABPC1;EEF2;B2M
Echovirus E2 VP2	2/57	0.0559892	0.355357	0	0	5.23697	15.0961	B2M;CFB
Norovirus Hu/GII-4/CGMH11/2006/TW major viral capsid protein	2/57	0.0559892	0.355021	0	0	5.23697	15.0961	UBC;B2M
Norovirus Hu/GII-4/CGMH14/2007/TW major viral capsid protein (gene: VP1)	2/57	0.0559892	0.354686	0	0	5.23697	15.0961	UBC;B2M
Norovirus Hu/GII-4/CGMH15/2007/TW major viral capsid protein	2/57	0.0559892	0.354352	0	0	5.23697	15.0961	UBC;B2M
Norovirus Hu/GII.4/20199/2009/VNM capsid protein VP1 (gene: VP1)	2/57	0.0559892	0.354018	0	0	5.23697	15.0961	UBC;B2M
Norovirus Hu/GII.4/HS288/2012/USA capsid protein VP1 (gene: VP1)	2/57	0.0559892	0.353685	0	0	5.23697	15.0961	UBC;B2M
Norovirus Hu/GII.4/Hong Kong/CUHK6080/2012/CHN VP1	2/57	0.0559892	0.353353	0	0	5.23697	15.0961	UBC;B2M
Norovirus Hu/GII.4/NIHIC17.1/2012/USA capsid protein VP1 (gene: VP1)	2/57	0.0559892	0.353021	0	0	5.23697	15.0961	UBC;B2M
Norovirus Hu/GII.4/NIHIC17.5/2012/USA capsid protein VP1 (gene: VP1)	2/57	0.0559892	0.35269	0	0	5.23697	15.0961	UBC;B2M
Norovirus Hu/GII.4/NIHIC17.6/2012/USA capsid protein VP1 (gene: VP1)	2/57	0.0559892	0.352359	0	0	5.23697	15.0961	UBC;B2M
Norovirus Hu/GII.4/NIHIC17.8/2013/USA capsid protein VP1 (gene: VP1)	2/57	0.0559892	0.352029	0	0	5.23697	15.0961	UBC;B2M
Norovirus Hu/GII.4/NIHIC17.9/2013/USA capsid protein VP1 (gene: VP1)	2/57	0.0559892	0.3517	0	0	5.23697	15.0961	UBC;B2M
Norovirus Hu/GII.4/NIHIC35/2013/USA capsid protein VP1 (gene: VP1)	2/57	0.0559892	0.351371	0	0	5.23697	15.0961	UBC;B2M
Norovirus Hu/GII.4/Ohio/684/USA VP1	2/57	0.0559892	0.351043	0	0	5.23697	15.0961	UBC;B2M
Norovirus Hu/GII.4/Rockdale/NSW006D/2009/AU VP1	2/57	0.0559892	0.350716	0	0	5.23697	15.0961	UBC;B2M
Human adenovirus 21a maturation protein IVa2 (gene: IVa2)	2/57	0.0559892	0.350389	0	0	5.23697	15.0961	UBB;UBC
Norovirus Hu/Norwalk/20123/2009/VNM capsid protein VP1 (gene: VP1)	2/57	0.0559892	0.350063	0	0	5.23697	15.0961	UBC;B2M
Vaccinia virus double-strand RNA-binding protein (gene: E3L)	2/57	0.0559892	0.349737	0	0	5.23697	15.0961	UBC;B2M
Papiine alphaherpesvirus 2 envelope glycoprotein C (gene: UL44)	5/308	0.0565096	0.35266	0	0	2.42295	6.96197	UBC;ALB;MT-CO2;B2M;ACTB
Human papillomavirus type 7 early protein (gene: E2)	3/130	0.0569773	0.355249	0	0	3.44432	9.86832	PABPC1;EEF2;B2M
Horsepox virus HSPV029 (kelch-like protein; Provisional)	4/216	0.0575686	0.358602	0	0	2.76396	7.89049	HSPA8;UBB;UBC;B2M
Cercopithecine betaherpesvirus 5 chemokine vCXCL7 (gene: UL146D)	2/58	0.057741	0.359343	0	0	5.14668	14.6772	UBC;B2M
Modoc virus envelope protein	2/58	0.057741	0.35901	0	0	5.14668	14.6772	UBC;B2M
Norovirus Hu/GII-4/CGMH10/2006/TW major viral capsid protein (gene: VP1)	2/58	0.057741	0.358678	0	0	5.14668	14.6772	UBC;B2M
Norovirus Hu/GII-4/CGMH22/2010/TW major viral capsid protein (gene: VP1)	2/58	0.057741	0.358347	0	0	5.14668	14.6772	UBC;B2M
Norovirus Hu/GII.4/Miranda/NSW850K/2011/AU VP1	2/58	0.057741	0.358016	0	0	5.14668	14.6772	UBC;B2M
Human T-lymphotropic virus 2 hypothetical protein (env propeptide)	2/58	0.057741	0.357686	0	0	5.14668	14.6772	FGG;UBC
Norovirus Hu/Norwalk/20033/2009/VNM capsid protein VP1 (gene: VP1)	2/58	0.057741	0.357356	0	0	5.14668	14.6772	UBC;B2M
Human alphaherpesvirus 1 DNA replication origin-binding helicase (gene: UL9)	2/58	0.057741	0.357027	0	0	5.14668	14.6772	HSPA8;UBC
Human papillomavirus 138 replication protein (gene: E1)	2/58	0.057741	0.356698	0	0	5.14668	14.6772	HSPA8;UBC
Influenza A virus (A/Shanghai/02/2013(H7N9)) matrix protein 1 (gene: M1)	3/131	0.0580377	0.358202	0	0	3.41802	9.72996	HSPA8;RPL13;B2M
Human T-lymphotropic virus 3 polymerase (gene: pol)	3/131	0.0580377	0.357873	0	0	3.41802	9.72996	HSP90AB1;UBC;B2M
Human betaherpesvirus 5 chemokine vCXCL2 (gene: UL147)	3/131	0.0580377	0.357544	0	0	3.41802	9.72996	HSP90AB1;UBC;B2M
Modoc virus matrix protein	43839	0.0587201	0.361417	0	0	16.5837	47.0145	UBC
Echovirus E7 VP4	43839	0.0587201	0.361086	0	0	16.5837	47.0145	B2M
Murray Valley encephalitis virus NS2B	43839	0.0587201	0.360756	0	0	16.5837	47.0145	B2M
Hepatitis C virus subtype 1a NS5B RNA-dependent RNA polymerase	43839	0.0587201	0.360426	0	0	16.5837	47.0145	B2M
Human betaherpesvirus 7 nuclear egress membrane protein (gene: U34)	43839	0.0587201	0.360097	0	0	16.5837	47.0145	B2M
Human coronavirus OC43 nsp9 (gene: orf1ab)	43839	0.0587201	0.359768	0	0	16.5837	47.0145	UBC
Variola virus hypothetical protein (gene: B23R)	43839	0.0587201	0.35944	0	0	16.5837	47.0145	HSPA8
Yellow fever virus non-structural protein NS2b	43839	0.0587201	0.359113	0	0	16.5837	47.0145	B2M
Yellow fever virus non-structural protein NS1	43839	0.0587201	0.358786	0	0	16.5837	47.0145	B2M
Vaccinia virus Ankara 64.7k Kelch-like protein f2	3/132	0.0591075	0.360824	0	0	3.39213	9.59429	RPL7A;UBC;B2M
Cowpox virus CPXV199 protein (gene: CPXV199 CDS)	2/59	0.0595119	0.362963	0	0	5.05945	14.2756	UBC;B2M
Cowpox virus SPI3 or CPXV042 protein (gene: SPI3)	2/59	0.0595119	0.362634	0	0	5.05945	14.2756	UBC;ACTB
Echovirus E3 3D	2/59	0.0595119	0.362305	0	0	5.05945	14.2756	UBC;ALB
Monkeypox virus Zaire-96-I-16 DNA polymerase (gene: F8L)	2/59	0.0595119	0.361977	0	0	5.05945	14.2756	UBC;B2M
Enterovirus D 3D-POL	2/59	0.0595119	0.361649	0	0	5.05945	14.2756	UBC;ALB
Norovirus Hu/GII-4/CGMH18/2008/TW major viral capsid protein (gene: VP1)	2/59	0.0595119	0.361322	0	0	5.05945	14.2756	UBC;B2M
Hepatitis B virus capsid protein (gene: C)	2/59	0.0595119	0.360996	0	0	5.05945	14.2756	HSPA8;UBC
Norovirus Hu/GII-4/CGMH28/2010/TW major viral capsid protein (gene: VP1)	2/59	0.0595119	0.36067	0	0	5.05945	14.2756	UBC;B2M
Human T-cell lymphotropic virus type 2b env	2/59	0.0595119	0.360345	0	0	5.05945	14.2756	FGG;UBC
Human alphaherpesvirus 2 helicase-primase helicase subunit (gene: UL5)	2/59	0.0595119	0.36002	0	0	5.05945	14.2756	HSP90AB1;UBC
Human enterovirus 94 3D	2/59	0.0595119	0.359696	0	0	5.05945	14.2756	UBC;ALB
Human papillomavirus 100 E7 protein (gene: E7)	2/59	0.0595119	0.359372	0	0	5.05945	14.2756	UBC;B2M
Human papillomavirus 173 E2	2/59	0.0595119	0.35905	0	0	5.05945	14.2756	PABPC1;B2M
Human papillomavirus type 163 E7 (gene: E7)	2/59	0.0595119	0.358727	0	0	5.05945	14.2756	UBC;B2M
Vaccinia virus IL-beta-binding protein (gene: VACWR-B15R)	3/133	0.0601865	0.362469	0	0	3.36663	9.46125	TTR;UBC;B2M
Orf virus ORF132 vascular endothelial growth factor-like protein	3/134	0.0612748	0.368692	0	0	3.3415	9.33076	HSPA8;UBC;B2M
Cercopithecine alphaherpesvirus 2 envelope glycoprotein C (gene: UL44)	2/60	0.0613013	0.368521	0	0	4.97512	13.8903	UBC;B2M
Human T-lymphotropic virus 4 envelope glycoprotein (gene: env)	2/60	0.0613013	0.368192	0	0	4.97512	13.8903	FGG;UBC
Human adenovirus 43 fiber protein (pIV) (gene: L5)	2/60	0.0613013	0.367863	0	0	4.97512	13.8903	UBC;B2M
Human adenovirus B3 protein IVa2 (gene: IVa2)	2/60	0.0613013	0.367534	0	0	4.97512	13.8903	UBB;UBC
Human papillomavirus KC5 E2 (gene: E2)	2/60	0.0613013	0.367206	0	0	4.97512	13.8903	HSP90AB1;UBC
Human papillomavirus type 52 early protein (gene: E7)	2/60	0.0613013	0.366879	0	0	4.97512	13.8903	UBC;B2M
Cowpox virus CPXV035 protein (gene: CPXV035 CDS)	4/221	0.0615742	0.368184	0	0	2.70143	7.53025	HSPA8;UBB;UBC;B2M
Human papillomavirus type 32 early protein (gene: E2)	3/135	0.0623723	0.372625	0	0	3.31675	9.20277	PABPC1;EEF2;B2M
Enterovirus H capsid protein VP1	2/61	0.063109	0.376691	0	0	4.89356	13.5204	UBC;B2M
Norovirus Hu/GII.4/Guangzhou/GZ2010-L88/CHN/2011 major viral capsid protein	2/61	0.063109	0.376356	0	0	4.89356	13.5204	UBC;B2M
Norovirus Hu/GII.4/Guangzhou/GZ2010-L91/CHN/2011 major viral capsid protein	2/61	0.063109	0.376022	0	0	4.89356	13.5204	UBC;B2M
Human adenovirus 16 maturation protein IVA2 (gene: IVa2)	2/61	0.063109	0.375689	0	0	4.89356	13.5204	UBB;UBC
Human adenovirus 7d2 maturation protein IVA2 (gene: IVa2)	2/61	0.063109	0.375356	0	0	4.89356	13.5204	UBB;UBC
Human alphaherpesvirus 2 envelope glycoprotein E (gene: US8)	3/137	0.0645947	0.383853	0	0	3.26833	8.95399	HSP90AB1;UBC;B2M
Human gammaherpesvirus 8 K4.1 (gene: K4.1)	3/137	0.0645947	0.383513	0	0	3.26833	8.95399	RPS4X;UBC;B2M
Human adenovirus 11+34 encapsidation protein IVa2 (gene: IVa2)	2/62	0.0649347	0.385191	0	0	4.81464	13.165	UBB;UBC
Dengue virus 3 protein pr (gene: flavivirus polyprotein)	43840	0.0650295	0.385413	0	0	14.9254	40.7898	B2M
Monkeypox virus Zaire-96-I-16 hypothetical protein (gene: D2L)	43840	0.0650295	0.385074	0	0	14.9254	40.7898	UBC
New Jersey polyomavirus-2013 small T antigen	43840	0.0650295	0.384734	0	0	14.9254	40.7898	HSPA8
Hepacivirus C NS5B RNA-dependent RNA polymerase	43840	0.0650295	0.384396	0	0	14.9254	40.7898	B2M
Human adenovirus 19 protease (gene: L3)	43840	0.0650295	0.384058	0	0	14.9254	40.7898	UBC
Human adenovirus 21a 13.6 kDa protein (gene: E4)	43840	0.0650295	0.38372	0	0	14.9254	40.7898	B2M
Human adenovirus 22 protease (gene: L3)	43840	0.0650295	0.383383	0	0	14.9254	40.7898	UBC
Human adenovirus 28 protease	43840	0.0650295	0.383047	0	0	14.9254	40.7898	UBC
Human adenovirus 36 protease	43840	0.0650295	0.382711	0	0	14.9254	40.7898	UBC
Human adenovirus 43 protease (gene: L3)	43840	0.0650295	0.382376	0	0	14.9254	40.7898	UBC
Human adenovirus 46 protease	43840	0.0650295	0.382041	0	0	14.9254	40.7898	UBC
Human adenovirus 49 proteinase	43840	0.0650295	0.381708	0	0	14.9254	40.7898	UBC
Human adenovirus 56 protease (gene: L3)	43840	0.0650295	0.381374	0	0	14.9254	40.7898	UBC
Human adenovirus 58 protease (gene: L3)	43840	0.0650295	0.381041	0	0	14.9254	40.7898	UBC
Human adenovirus 63 protease (gene: L3)	43840	0.0650295	0.380709	0	0	14.9254	40.7898	UBC
Human adenovirus 64 L3 protease	43840	0.0650295	0.380378	0	0	14.9254	40.7898	UBC
Human adenovirus 65 L3 protease	43840	0.0650295	0.380046	0	0	14.9254	40.7898	UBC
Human adenovirus 67 L3 protease	43840	0.0650295	0.379716	0	0	14.9254	40.7898	UBC
Human adenovirus 71 protease (gene: L3)	43840	0.0650295	0.379386	0	0	14.9254	40.7898	UBC
Human adenovirus Chiba_E086/2012 protease (gene: L3)	43840	0.0650295	0.379057	0	0	14.9254	40.7898	UBC
Rhinovirus C capsid protein VP4	43840	0.0650295	0.378728	0	0	14.9254	40.7898	UBC
Human adenovirus D10 protease (gene: L3)	43840	0.0650295	0.3784	0	0	14.9254	40.7898	UBC
Human adenovirus D37 protease (gene: L3)	43840	0.0650295	0.378072	0	0	14.9254	40.7898	UBC
Variola virus hypothetical protein (gene: J6R)	43840	0.0650295	0.377745	0	0	14.9254	40.7898	HSPA8
Human mastadenovirus D protease (gene: L3)	43840	0.0650295	0.377419	0	0	14.9254	40.7898	UBC
Human polyomavirus 7 small T antigen	43840	0.0650295	0.377093	0	0	14.9254	40.7898	HSPA8
Human papillomavirus type 90 putative regulatory protein E2 (gene: E2)	3/138	0.0657196	0.380765	0	0	3.24465	8.83309	PABPC1;EEF2;B2M
Human betaherpesvirus 7 membrane glycoprotein UL119 (gene: U85)	6/425	0.0665858	0.385451	0	0	2.10711	5.70872	HSP90AB1;UBB;UBC;MYH9;RPS27A;B2M
Cercopithecine betaherpesvirus 5 chemokine vCXCL9 (gene: UL146F)	2/63	0.066778	0.386231	0	0	4.73821	12.8234	PABPC1;B2M
Human mastadenovirus A IVa2	2/63	0.066778	0.385899	0	0	4.73821	12.8234	UBC;B2M
Human papillomavirus type 49 E2 protein (gene: E2)	2/63	0.066778	0.385567	0	0	4.73821	12.8234	EEF1G;B2M
Echovirus E32 VP2	2/64	0.0686386	0.395969	0	0	4.66418	12.4949	B2M;CFB
Human adenovirus 14 IVa2 protein (gene: IVa2)	2/64	0.0686386	0.39563	0	0	4.66418	12.4949	UBB;UBC
Human adenovirus 55 pIVa2 50.9 kDa protein	2/64	0.0686386	0.39529	0	0	4.66418	12.4949	UBB;UBC
Human adenovirus 66 maturation protein IVA2 (gene: IVa2)	2/64	0.0686386	0.394952	0	0	4.66418	12.4949	UBB;UBC
Reston ebolavirus - Reston virion spike glycoprotein precursor (gene: GP)	2/64	0.0686386	0.394613	0	0	4.66418	12.4949	HSP90AB1;B2M
Vaccinia virus EEV membrane glycoprotein (gene: B5R)	2/64	0.0686386	0.394276	0	0	4.66418	12.4949	UBC;B2M
Human gammaherpesvirus 8 vIRF-4 (gene: vIRF-4)	2/64	0.0686386	0.393939	0	0	4.66418	12.4949	PABPC1;B2M
Human papillomavirus type 39 E2 (gene: E2)	2/64	0.0686386	0.393602	0	0	4.66418	12.4949	PABPC1;B2M
Molluscum contagiosum virus subtype 1 MC148R (gene: MC148R)	3/141	0.0691479	0.396185	0	0	3.17561	8.48367	RPS4X;UBC;B2M
JC polyomavirus hypothetical protein	2/65	0.0705163	0.40368	0	0	4.59242	12.1787	HSPA8;UBC
Ectromelia virus ERPV interferon gamma receptor	2/65	0.0705163	0.403336	0	0	4.59242	12.1787	UBC;B2M
Ectromelia virus ERPV interferon resistance and PKR inhibitor	2/65	0.0705163	0.402993	0	0	4.59242	12.1787	HSPA8;UBC
Hepatitis C virus subtype 2a full_polyprotein 1..3033	2/65	0.0705163	0.40265	0	0	4.59242	12.1787	HSPA8;B2M
Human papillomavirus 100 E2 protein (gene: E2)	2/65	0.0705163	0.402308	0	0	4.59242	12.1787	EEF1G;B2M
Human papillomavirus type XS2 E2 (gene: E2)	2/65	0.0705163	0.401967	0	0	4.59242	12.1787	PABPC1;EEF2
Influenza A virus (A/New York/599/1996(H3N2)) polymerase PA (gene: PA)	43841	0.071297	0.406072	0	0	13.5685	35.8331	B2M
Cercopithecine betaherpesvirus 5 membrane protein US20 (gene: US20)	43841	0.071297	0.405728	0	0	13.5685	35.8331	UBC
Measles virus strain Edmonston-Zagreb nucleocapsid protein (gene: N)	43841	0.071297	0.405385	0	0	13.5685	35.8331	UBC
Measles virus strain MVi/Pennsylvania.USA/20.09 nucleocapsid protein (gene: N)	43841	0.071297	0.405042	0	0	13.5685	35.8331	UBC
Measles virus strain MVi/Virginia.USA/15.09 nucleocapsid protein (gene: N)	43841	0.071297	0.404699	0	0	13.5685	35.8331	UBC
Norovirus GI Pro	43841	0.071297	0.404357	0	0	13.5685	35.8331	HSP90AB1
Norovirus GI VPg	43841	0.071297	0.404016	0	0	13.5685	35.8331	UBC
Enterovirus C capsid protein VP4	43841	0.071297	0.403676	0	0	13.5685	35.8331	B2M
Norovirus Hu/GI.1/8CKIIIc/1974/USA 3C-like protease (gene: POL)	43841	0.071297	0.403335	0	0	13.5685	35.8331	HSP90AB1
Norovirus Hu/GI.1/8CKIIIc/1974/USA viral genome-linked protein (gene: POL)	43841	0.071297	0.402996	0	0	13.5685	35.8331	UBC
Norovirus Hu/GI.1/8FIIa/1968/USA 3C-like protease (gene: POL)	43841	0.071297	0.402657	0	0	13.5685	35.8331	HSP90AB1
Norovirus Hu/GI.1/8FIIa/1968/USA viral genome-linked protein (gene: POL)	43841	0.071297	0.402319	0	0	13.5685	35.8331	UBC
Norovirus Hu/GI.1/8K/1979/USA viral genome-linked protein (gene: POL)	43841	0.071297	0.401981	0	0	13.5685	35.8331	UBC
Norovirus Hu/GI.1/8K/1979/USA 3C-like protease (gene: POL)	43841	0.071297	0.401644	0	0	13.5685	35.8331	HSP90AB1
Norovirus Hu/GI.1/8MC/1978/USA viral genome-linked protein (gene: POL)	43841	0.071297	0.401307	0	0	13.5685	35.8331	UBC
Norovirus Hu/GI.1/8MC/1978/USA 3C-like protease (gene: POL)	43841	0.071297	0.400971	0	0	13.5685	35.8331	HSP90AB1
Norovirus Hu/GI.1/8McIII/1973/USA viral genome-linked protein (gene: POL)	43841	0.071297	0.400635	0	0	13.5685	35.8331	UBC
Norovirus Hu/GI.1/8McIII/1973/USA 3C-like protease (gene: POL)	43841	0.071297	0.4003	0	0	13.5685	35.8331	HSP90AB1
Norovirus Hu/GI.1/8MoIIIL/1972/USA viral genome-linked protein (gene: POL)	43841	0.071297	0.399966	0	0	13.5685	35.8331	UBC
Norovirus Hu/GI.1/8MoIIIL/1972/USA 3C-like protease (gene: POL)	43841	0.071297	0.399632	0	0	13.5685	35.8331	HSP90AB1
Norovirus Hu/GI.1/8UIIIf/1973/USA viral genome-linked protein (gene: POL)	43841	0.071297	0.399299	0	0	13.5685	35.8331	UBC
Norovirus Hu/GI.1/8UIIIf/1973/USA 3C-like protease (gene: POL)	43841	0.071297	0.398966	0	0	13.5685	35.8331	HSP90AB1
Norovirus Hu/GI.1/8W/1968/USA 3C-like protease (gene: POL)	43841	0.071297	0.398634	0	0	13.5685	35.8331	HSP90AB1
Norovirus Hu/GI.1/8W/1968/USA viral genome-linked protein (gene: POL)	43841	0.071297	0.398302	0	0	13.5685	35.8331	UBC
Horsepox virus HSPV015a	43841	0.071297	0.397971	0	0	13.5685	35.8331	B2M
Human adenovirus 16 23 kDa protease (gene: L3)	43841	0.071297	0.397641	0	0	13.5685	35.8331	UBC
Human adenovirus 21 23 kDa proteinase (gene: L3)	43841	0.071297	0.397311	0	0	13.5685	35.8331	UBC
Human adenovirus 21a 23 kDa proteinase (gene: L3)	43841	0.071297	0.396981	0	0	13.5685	35.8331	UBC
Human adenovirus 3+7 23 kDa protease (gene: L3)	43841	0.071297	0.396652	0	0	13.5685	35.8331	UBC
Human adenovirus 50 23 kDa protein (gene: L3)	43841	0.071297	0.396324	0	0	13.5685	35.8331	UBC
Human adenovirus 50 DNA polymerase (gene: E2B)	43841	0.071297	0.395996	0	0	13.5685	35.8331	UBC
Human adenovirus 54 protease	43841	0.071297	0.395669	0	0	13.5685	35.8331	UBC
Papiine alphaherpesvirus 2 ribonucleotide reductase subunit 1 (gene: UL39)	43841	0.071297	0.395342	0	0	13.5685	35.8331	UBC
Human adenovirus 66 23 kDa protease (gene: L3)	43841	0.071297	0.395016	0	0	13.5685	35.8331	UBC
Human adenovirus 68 23 kDa protease (gene: L3)	43841	0.071297	0.39469	0	0	13.5685	35.8331	UBC
Human adenovirus 7 protease	43841	0.071297	0.394365	0	0	13.5685	35.8331	UBC
Rhinovirus A RNA-directed RNA polymerase	43841	0.071297	0.39404	0	0	13.5685	35.8331	UBC
Human adenovirus 7d2 23 kDa protease (gene: L3)	43841	0.071297	0.393716	0	0	13.5685	35.8331	UBC
Human adenovirus B3 L3 23-kDa protein (protease) (gene: L3)	43841	0.071297	0.393393	0	0	13.5685	35.8331	UBC
Human adenovirus D8 protease (gene: L3)	43841	0.071297	0.39307	0	0	13.5685	35.8331	UBC
Salivirus NG-J1 VP0	43841	0.071297	0.392747	0	0	13.5685	35.8331	B2M
Human papillomavirus type 59 ORF putative E6	43841	0.071297	0.392426	0	0	13.5685	35.8331	UBC
Human rhinovirus A28 3D (polymerase)	43841	0.071297	0.392104	0	0	13.5685	35.8331	UBC
Human rhinovirus A32 3D	43841	0.071297	0.391783	0	0	13.5685	35.8331	UBC
Human rhinovirus A36 3D (polymerase)	43841	0.071297	0.391463	0	0	13.5685	35.8331	UBC
Human rhinovirus A43 3D	43841	0.071297	0.391143	0	0	13.5685	35.8331	UBC
Human rhinovirus A46 3D (polymerase)	43841	0.071297	0.390824	0	0	13.5685	35.8331	UBC
Human rhinovirus A58 3D	43841	0.071297	0.390505	0	0	13.5685	35.8331	UBC
Human rhinovirus A61 3D	43841	0.071297	0.390187	0	0	13.5685	35.8331	UBC
Human rhinovirus A67 3D	43841	0.071297	0.389869	0	0	13.5685	35.8331	UBC
Human rhinovirus A73 3D (polymerase)	43841	0.071297	0.389552	0	0	13.5685	35.8331	UBC
Human rhinovirus A82 3D	43841	0.071297	0.389235	0	0	13.5685	35.8331	UBC
Human rhinovirus A89 3D	43841	0.071297	0.388919	0	0	13.5685	35.8331	UBC
Human rhinovirus A96 3D	43841	0.071297	0.388603	0	0	13.5685	35.8331	UBC
Cowpox virus CPXV169 protein (gene: CPXV169 CDS)	3/143	0.0714779	0.389274	0	0	3.1312	8.26125	HSP90AB1;PABPC1;B2M
Horsepox virus HSPV182 (EEV membrane glycoprotein; Provisional)	2/66	0.0724107	0.394034	0	0	4.52284	11.8743	UBC;B2M
Human papillomavirus 152 early protein E2 (gene: E2)	2/66	0.0724107	0.393715	0	0	4.52284	11.8743	PABPC1;B2M
Human T-cell leukemia virus type I Pr gag-pro (gene: gag-pro)	2/67	0.0743215	0.403777	0	0	4.45534	11.581	HSPA8;HSP90AB1
Human mastadenovirus F membrane glycoprotein E3 CR1-beta (gene: E3A)	5/335	0.0750689	0.407508	0	0	2.22767	5.76821	UBB;UBC;MT-CO2;RPS27A;B2M
Human betaherpesvirus 6 U85, OX-2 homologue (gene: U85)	6/439	0.0752299	0.408053	0	0	2.03991	5.27768	HSP90AB1;UBB;UBC;LCN2;RPL13;B2M
Human betaherpesvirus 6A membrane glycoprotein UL119 (gene: U85)	6/439	0.0752299	0.407723	0	0	2.03991	5.27768	HSP90AB1;UBB;UBC;LCN2;RPL13;B2M
Human immunodeficiency virus 2 full_polyprotein 1..1550 (gene: gag-pol)	4/237	0.0753542	0.408067	0	0	2.51905	6.51314	HSPA8;HSP90AB1;UBC;B2M
Molluscum contagiosum virus subtype 1 MC162R (gene: MC162R)	3/147	0.0762426	0.412546	0	0	3.04599	7.83989	HSP90AB1;UBC;B2M
Horsepox virus HSPV067 (sulfhydryl oxidase)	2/68	0.0762484	0.412245	0	0	4.38982	11.2983	UBC;ALB
Human adenovirus 21 maturation protein IVa2 (gene: IVa2)	2/68	0.0762484	0.411913	0	0	4.38982	11.2983	UBB;UBC
Human adenovirus 34 maturation protein IVa2 (gene: IVa2)	2/68	0.0762484	0.411582	0	0	4.38982	11.2983	UBB;UBC
Human adenovirus 35 IVa2	2/68	0.0762484	0.411251	0	0	4.38982	11.2983	UBB;UBC
STL polyomavirus middle T antigen	2/68	0.0762484	0.410921	0	0	4.38982	11.2983	HSPA8;UBC
Marburg virus - Musoke, Kenya, 1980 glycoprotein (gene: GP)	3/148	0.0774553	0.417091	0	0	3.02541	7.73917	HSPA8;UBC;FGG
Aichi virus 1 VP1	43842	0.0775227	0.417119	0	0	12.4378	31.8058	UBC
Cercopithecine betaherpesvirus 5 nuclear egress membrane protein (gene: UL50)	43842	0.0775227	0.416785	0	0	12.4378	31.8058	B2M
Coxsackievirus A13 vp4	43842	0.0775227	0.416452	0	0	12.4378	31.8058	UBC
Eastern equine encephalitis virus nsP2 protein	43842	0.0775227	0.416119	0	0	12.4378	31.8058	UBC
Monkeypox virus Zaire-96-I-16 hypothetical protein (gene: N3R)	43842	0.0775227	0.415787	0	0	12.4378	31.8058	B2M
Enterovirus C109 VP4	43842	0.0775227	0.415455	0	0	12.4378	31.8058	UBC
Human adenovirus 16 ORF3 (gene: E4)	43842	0.0775227	0.415124	0	0	12.4378	31.8058	B2M
Human adenovirus 21 13.6 kDa protein (gene: E4)	43842	0.0775227	0.414793	0	0	12.4378	31.8058	B2M
Human adenovirus 3+7 ORF3 (gene: E4)	43842	0.0775227	0.414462	0	0	12.4378	31.8058	B2M
Human adenovirus 50 Orf3 protein (gene: E4)	43842	0.0775227	0.414133	0	0	12.4378	31.8058	B2M
Human adenovirus 68 ORF3 (gene: E4)	43842	0.0775227	0.413804	0	0	12.4378	31.8058	B2M
Human adenovirus 7 E4 ORF3	43842	0.0775227	0.413475	0	0	12.4378	31.8058	B2M
Rhinovirus A81 3D	43842	0.0775227	0.413147	0	0	12.4378	31.8058	UBC
Rhinovirus A98 3D	43842	0.0775227	0.412819	0	0	12.4378	31.8058	UBC
Human adenovirus B3 E4 ORF3 (gene: E4)	43842	0.0775227	0.412492	0	0	12.4378	31.8058	B2M
Human betaherpesvirus 6B Uracyl-DNA glycosylase (gene: U81)	43842	0.0775227	0.412165	0	0	12.4378	31.8058	RPS2
Variola virus hypothetical protein (gene: J10R)	43842	0.0775227	0.411839	0	0	12.4378	31.8058	UBC
Human mastadenovirus E control protein E4orf3 (gene: E4)	43842	0.0775227	0.411514	0	0	12.4378	31.8058	B2M
Human orthopneumovirus matrix protein 2 (gene: M2)	43842	0.0775227	0.411189	0	0	12.4378	31.8058	UBC
Human rhinovirus A100 3D	43842	0.0775227	0.410864	0	0	12.4378	31.8058	UBC
Human rhinovirus A31 3D	43842	0.0775227	0.41054	0	0	12.4378	31.8058	UBC
Human rhinovirus A40 3D	43842	0.0775227	0.410217	0	0	12.4378	31.8058	UBC
Human rhinovirus A47 3D	43842	0.0775227	0.409894	0	0	12.4378	31.8058	UBC
Human rhinovirus A56 3D	43842	0.0775227	0.409571	0	0	12.4378	31.8058	UBC
Human rhinovirus A59 3D (polymerase)	43842	0.0775227	0.409249	0	0	12.4378	31.8058	UBC
Human rhinovirus A75 3D (polymerase)	43842	0.0775227	0.408928	0	0	12.4378	31.8058	UBC
Human rhinovirus A78 3D	43842	0.0775227	0.408607	0	0	12.4378	31.8058	UBC
Human rhinovirus A9 3D	43842	0.0775227	0.408286	0	0	12.4378	31.8058	UBC
Human rhinovirus A94 3D	43842	0.0775227	0.407966	0	0	12.4378	31.8058	UBC
Human adenovirus D10 19KDa protein (gene: E3)	2/69	0.0781911	0.411161	0	0	4.3262	11.0257	HSP90AB1;B2M
Human papillomavirus type 45 early protein (gene: E2)	2/69	0.0781911	0.41084	0	0	4.3262	11.0257	PABPC1;B2M
Human papillomavirus type 72b E2 protein (gene: E2)	2/69	0.0781911	0.410518	0	0	4.3262	11.0257	PABPC1;B2M
Vaccinia virus Ankara Haemagglutinin	6/446	0.079782	0.418544	0	0	2.0079	5.07688	UBB;AMBP;UBC;RPL13;RPS27A;B2M
Hepatitis C virus subtype 4v full_polyprotein 1..3005	2/70	0.0801493	0.420142	0	0	4.26439	10.7627	HSPA8;UBC
Human adenovirus 36 fiber	2/70	0.0801493	0.419815	0	0	4.26439	10.7627	UBC;B2M
STL polyomavirus small T antigen	2/70	0.0801493	0.419487	0	0	4.26439	10.7627	HSPA8;UBC
Cosavirus JMY-2014 full_polyprotein 1..2119	2/71	0.0821227	0.429481	0	0	4.20433	10.5089	B2M;CFB
Hepatitis C virus subtype 2k/1b full_polyprotein 1..3010	2/71	0.0821227	0.429147	0	0	4.20433	10.5089	UBC;B2M
Human Respiratory syncytial virus 9320 F	2/71	0.0821227	0.428813	0	0	4.20433	10.5089	PABPC1;RPS2
Influenza A virus (A/goose/Guangdong/1/1996(H5N1)) neuraminidase (gene: NA)	43843	0.083707	0.436746	0	0	11.4811	28.478	B2M
Echovirus E26 VP4	43843	0.083707	0.436407	0	0	11.4811	28.478	UBC
Norovirus Hu/GI/10360/2010/VNM viral genome-linked protein (gene: POL)	43843	0.083707	0.436069	0	0	11.4811	28.478	MT-CO3
Human T-lymphotropic virus 2 p19-gag protein [2]	43843	0.083707	0.435731	0	0	11.4811	28.478	UBC
Saffold virus capsid protein VP1	43843	0.083707	0.435393	0	0	11.4811	28.478	B2M
Vaccinia virus hypothetical protein (gene: C6L)	43843	0.083707	0.435056	0	0	11.4811	28.478	UBC
Vaccinia virus Ankara 18.7k hypothetical protein	43843	0.083707	0.43472	0	0	11.4811	28.478	UBC
Western equine encephalitis virus NTPase	43843	0.083707	0.434384	0	0	11.4811	28.478	UBC
Human parechovirus 2A protein (gene: polyprotein)	43843	0.083707	0.434048	0	0	11.4811	28.478	UBC
Human rhinovirus A23 3D (polymerase)	43843	0.083707	0.433713	0	0	11.4811	28.478	UBC
Human rhinovirus A29 3D	43843	0.083707	0.433379	0	0	11.4811	28.478	UBC
Human rhinovirus A30 3D	43843	0.083707	0.433045	0	0	11.4811	28.478	UBC
Human rhinovirus A38 3D	43843	0.083707	0.432712	0	0	11.4811	28.478	UBC
Human rhinovirus A47 2C	43843	0.083707	0.432379	0	0	11.4811	28.478	UBC
Human rhinovirus A49 3D	43843	0.083707	0.432046	0	0	11.4811	28.478	UBC
Human rhinovirus A66 3D	43843	0.083707	0.431715	0	0	11.4811	28.478	UBC
Human rhinovirus A88 3D (polymerase)	43843	0.083707	0.431383	0	0	11.4811	28.478	UBC
Monkeypox virus bifunctional DNA/RNA-helicase/DExH-NPH-II	2/72	0.0841111	0.433133	0	0	4.14594	10.2638	UBC;PABPC1
Monkeypox virus Zaire-96-I-16 RNA helicase NPH-II (gene: I8R)	2/72	0.0841111	0.432801	0	0	4.14594	10.2638	UBC;PABPC1
Human cosavirus D 3C	2/72	0.0841111	0.43247	0	0	4.14594	10.2638	AMBP;UBC
Vaccinia virus C-type lectin-like type-II membrane protein (gene: A40R)	3/154	0.0849081	0.436234	0	0	2.90754	7.17053	HSPA8;UBC;B2M
Vaccinia virus Ankara C-type lectin-like protein	3/154	0.0849081	0.435901	0	0	2.90754	7.17053	HSPA8;UBC;B2M
Monkeypox virus Zaire-96-I-16 Kelch-like protein (gene: C9L)	4/248	0.0856573	0.439411	0	0	2.40732	5.91575	HSPA8;UBB;UBC;RPS27A
Respiratory syncytial virus Fusion protein (F) (gene: F)	2/73	0.0861141	0.441417	0	0	4.08914	10.0269	PABPC1;RPS2
Respiratory syncytial virus type A fusion protein (gene: F)	2/73	0.0861141	0.44108	0	0	4.08914	10.0269	PABPC1;RPS2
Vaccinia virus hypothetical protein (gene: C5L)	2/73	0.0861141	0.440744	0	0	4.08914	10.0269	HSPA8;UBC
Human papillomavirus 17 early protein (gene: E1)	2/73	0.0861141	0.440408	0	0	4.08914	10.0269	FGG;RPL13
Influenza A virus (A/New York/392/2004(H3N2)) hemagglutinin (gene: HA)	2/74	0.0881315	0.450383	0	0	4.03388	9.79801	APOA1;B2M
Horsepox virus HSPV078 (RNA helicase NPH-II)	2/74	0.0881315	0.45004	0	0	4.03388	9.79801	HSPA8;PABPC1
Human papillomavirus 173 E1	2/74	0.0881315	0.449698	0	0	4.03388	9.79801	FGG;UBC
Human papillomavirus type 34 early protein (gene: E7)	2/74	0.0881315	0.449357	0	0	4.03388	9.79801	UBC;B2M
Cowpox virus CPXV187 protein (gene: CPXV187 CDS)	43844	0.0898501	0.457772	0	0	10.661	25.6888	UBC
Coxsackievirus A11 vp4	43844	0.0898501	0.457425	0	0	10.661	25.6888	UBC
Echovirus E11 1A(VP4)	43844	0.0898501	0.457079	0	0	10.661	25.6888	UBC
Horsepox virus HSPV171 (Orthopoxvirus A49R protein)	43844	0.0898501	0.456733	0	0	10.661	25.6888	UBC
Human Respiratory syncytial virus 9320 M2-1	43844	0.0898501	0.456387	0	0	10.661	25.6888	UBC
Human adenovirus 11+34 L3 23.7 kDa protein (gene: L3)	43844	0.0898501	0.456042	0	0	10.661	25.6888	UBC
Human adenovirus 11a L3 23 kDa protease	43844	0.0898501	0.455698	0	0	10.661	25.6888	UBC
Human adenovirus 14 23 kDa protein (gene: L3)	43844	0.0898501	0.455354	0	0	10.661	25.6888	UBC
Human adenovirus 35 protease	43844	0.0898501	0.45501	0	0	10.661	25.6888	UBC
Human adenovirus 52 protease	43844	0.0898501	0.454667	0	0	10.661	25.6888	UBC
Human adenovirus 54 polymerase	43844	0.0898501	0.454325	0	0	10.661	25.6888	UBC
Human adenovirus 55 L3 23K 23.7 kDa protein	43844	0.0898501	0.453983	0	0	10.661	25.6888	UBC
Human adenovirus 66 DNA polymerase (gene: E2B)	43844	0.0898501	0.453642	0	0	10.661	25.6888	UBC
Human alphaherpesvirus 3 DNA polymerase processivity subunit (gene: ORF16)	43844	0.0898501	0.453301	0	0	10.661	25.6888	UBC
Uukuniemi virus membrane glycoprotein G2	43844	0.0898501	0.452961	0	0	10.661	25.6888	B2M
Human cosavirus D 3D	43844	0.0898501	0.452621	0	0	10.661	25.6888	UBC
Human cyclovirus capsid protein	43844	0.0898501	0.452282	0	0	10.661	25.6888	B2M
Human enteric coronavirus 4408 small envelope protein (gene: E)	43844	0.0898501	0.451943	0	0	10.661	25.6888	UBC
Human enteric coronavirus strain 4408 envelope protein	43844	0.0898501	0.451605	0	0	10.661	25.6888	UBC
Human enterovirus C102 vp4	43844	0.0898501	0.451267	0	0	10.661	25.6888	UBC
Human herpesvirus 3 strain Dumas processivity factor	43844	0.0898501	0.450929	0	0	10.661	25.6888	UBC
Yellow fever virus RNA-dependent RNA polymerase	43844	0.0898501	0.450593	0	0	10.661	25.6888	B2M
Human mastadenovirus B protease (gene: L3)	43844	0.0898501	0.450256	0	0	10.661	25.6888	UBC
Human mastadenovirus F protease (gene: L3)	43844	0.0898501	0.449921	0	0	10.661	25.6888	UBC
Human papillomavirus type 67 E6	43844	0.0898501	0.449585	0	0	10.661	25.6888	B2M
Human polyomavirus 6 small T antigen	43844	0.0898501	0.449251	0	0	10.661	25.6888	HSPA8
Human rhinovirus A7 3D	43844	0.0898501	0.448916	0	0	10.661	25.6888	UBC
Human cosavirus full_polyprotein 1..2121	2/75	0.0901629	0.450144	0	0	3.9801	9.57666	B2M;CFB
Human immunodeficiency virus 1 Envelope surface glycoprotein gp160, precursor (gene: env)	3/159	0.091344	0.455702	0	0	2.81611	6.73929	HSPA8;UBC;B2M
Cowpox virus CPXV196 protein (gene: CPXV196 CDS)	5/356	0.0915367	0.456324	0	0	2.09626	5.01219	HSPA8;HSP90AB1;PABPC1;B2M;S100A9
Human adenovirus 3+7 maturation protein IVA2 (gene: IVa2)	2/76	0.0922082	0.459331	0	0	3.92773	9.36255	UBB;UBC
Orf virus ORF057 putative protein-tyrosine phosphatase	2/76	0.0922082	0.458991	0	0	3.92773	9.36255	HSPA8;UBC
Variola virus hypothetical protein (gene: B22R)	2/76	0.0922082	0.458651	0	0	3.92773	9.36255	HSPA8;UBC
Yaba monkey tumor virus 142R	5/357	0.0923642	0.459086	0	0	2.09039	4.97934	HSPA8;HSP90AB1;UBC;MYH9;RPL23A
Marburg marburgvirus glycoprotein (gene: GP)	3/160	0.092655	0.460191	0	0	2.79851	6.65729	HSPA8;UBC;FGG
Human adenovirus 50 maturation protein IVa2 (gene: IVa2)	2/77	0.0942671	0.467852	0	0	3.87672	9.15535	UBB;UBC
Human papillomavirus 15 early protein (gene: E2)	2/77	0.0942671	0.467506	0	0	3.87672	9.15535	EEF1G;B2M
Langat virus nonstructural protein NS5	43845	0.0959524	0.475513	0	0	9.95025	23.3224	HSPA8
Cowpox virus CPXV094 protein (gene: CPXV094 CDS)	43845	0.0959524	0.475163	0	0	9.95025	23.3224	B2M
Cyclovirus VN capsid protein	43845	0.0959524	0.474812	0	0	9.95025	23.3224	B2M
Middle East respiratory syndrome-related coronavirus nsp12 protein (gene: orf1ab)	43845	0.0959524	0.474463	0	0	9.95025	23.3224	UBB
Dengue virus 3 RNA-dependent RNA polymerase NS5 (gene: flavivirus polyprotein)	43845	0.0959524	0.474114	0	0	9.95025	23.3224	B2M
Ectromelia virus ERPV intracellular TLR and IL-1 signaling inhibitor	43845	0.0959524	0.473765	0	0	9.95025	23.3224	HSPA8
Hepatitis C virus genotype 4 NS5B RNA-dependent RNA polymerase	43845	0.0959524	0.473417	0	0	9.95025	23.3224	UBC
Human adenovirus 11+34 E4 ORF3 protein (gene: E4)	43845	0.0959524	0.473069	0	0	9.95025	23.3224	B2M
Human adenovirus 11a E4 ORF3 protein	43845	0.0959524	0.472722	0	0	9.95025	23.3224	B2M
Human adenovirus 11a L1 protein IIIa precursor	43845	0.0959524	0.472376	0	0	9.95025	23.3224	UBC
Human adenovirus 12 E4 11 KD protein	43845	0.0959524	0.47203	0	0	9.95025	23.3224	B2M
Human adenovirus 14 Orf3 protein (gene: E4)	43845	0.0959524	0.471684	0	0	9.95025	23.3224	B2M
Human adenovirus 18 ORF3 protein (gene: E4)	43845	0.0959524	0.471339	0	0	9.95025	23.3224	B2M
Human adenovirus 3+7 peripentonal hexon associated protein IIIa precursor (gene: L1)	43845	0.0959524	0.470994	0	0	9.95025	23.3224	UBC
Human adenovirus 34 Orf3 protein (gene: E4)	43845	0.0959524	0.47065	0	0	9.95025	23.3224	B2M
Human adenovirus 34 protein IIIa precursor (gene: L1)	43845	0.0959524	0.470307	0	0	9.95025	23.3224	UBC
Human adenovirus 35 pIIIa	43845	0.0959524	0.469964	0	0	9.95025	23.3224	UBC
Human adenovirus 35 E4 ORF3	43845	0.0959524	0.469621	0	0	9.95025	23.3224	B2M
Human adenovirus 41 protease	43845	0.0959524	0.469279	0	0	9.95025	23.3224	UBC
Human adenovirus 52 E4 ORF3 (gene: E4)	43845	0.0959524	0.468938	0	0	9.95025	23.3224	B2M
Human adenovirus 55 L1 pIIIa 65.6 kDa protein	43845	0.0959524	0.468597	0	0	9.95025	23.3224	UBC
Human adenovirus 55 E4 ORF3 13.6 kDa protein	43845	0.0959524	0.468256	0	0	9.95025	23.3224	B2M
Human adenovirus 66 ORF3 (gene: E4)	43845	0.0959524	0.467916	0	0	9.95025	23.3224	B2M
Human adenovirus 7d2 ORF3 (gene: E4)	43845	0.0959524	0.467576	0	0	9.95025	23.3224	B2M
Human adenovirus B3 E2B DNA polymerase (gene: E2B)	43845	0.0959524	0.467237	0	0	9.95025	23.3224	UBC
Titi monkey adenovirus ECC-2011 protease	43845	0.0959524	0.466899	0	0	9.95025	23.3224	UBC
Human betaherpesvirus 5 helicase-primase helicase subunit (gene: UL105)	43845	0.0959524	0.466561	0	0	9.95025	23.3224	UBC
Human betaherpesvirus 5 membrane protein US17 (gene: US17)	43845	0.0959524	0.466223	0	0	9.95025	23.3224	UBC
Variola virus hypothetical protein (gene: B15R)	43845	0.0959524	0.465886	0	0	9.95025	23.3224	B2M
Human gammaherpesvirus 8 ORF21 (gene: ORF21)	43845	0.0959524	0.465549	0	0	9.95025	23.3224	UBC
Human mastadenovirus A E4 ORF3	43845	0.0959524	0.465213	0	0	9.95025	23.3224	B2M
Human mastadenovirus B control protein E4orf3 (gene: E4)	43845	0.0959524	0.464878	0	0	9.95025	23.3224	B2M
Human mastadenovirus B DNA polymerase (gene: E2B)	43845	0.0959524	0.464542	0	0	9.95025	23.3224	UBC
Human rhinovirus A45 3D	43845	0.0959524	0.464208	0	0	9.95025	23.3224	UBC
Human rhinovirus A8 3D	43845	0.0959524	0.463874	0	0	9.95025	23.3224	UBC
Enterovirus A120 full_polyprotein 1..2191	2/78	0.0963391	0.465408	0	0	3.82702	8.95477	C3;UBC
Vaccinia virus RNA helicase NPH-II (gene: I8R)	2/78	0.0963391	0.465074	0	0	3.82702	8.95477	HSPA8;PABPC1
Ectromelia virus ERPV RNA helicase	2/79	0.0984242	0.474798	0	0	3.77858	8.76051	HSPA8;PABPC1
Hepatitis C virus subtype 2k full_polyprotein 1..3033	2/79	0.0984242	0.474457	0	0	3.77858	8.76051	HSP90AB1;B2M
Dengue virus 1 RNA-dependent RNA polymerase NS5 (gene: flavivirus polyprotein)	43846	0.102014	0.491409	0	0	9.32836	21.2933	B2M
Middle East respiratory syndrome-related coronavirus nsp5 protein (gene: orf1ab)	43846	0.102014	0.491057	0	0	9.32836	21.2933	UBB
Middle East respiratory syndrome-related coronavirus nsp16 protein (gene: orf1ab)	43846	0.102014	0.490705	0	0	9.32836	21.2933	UBB
Hepacivirus C NS2 protein	43846	0.102014	0.490354	0	0	9.32836	21.2933	B2M
Hepatitis C virus (isolate 6a33) putative NS5B protein	43846	0.102014	0.490003	0	0	9.32836	21.2933	UBC
Hepatitis C virus genotype 6 NS5B RNA-dependent RNA polymerase	43846	0.102014	0.489653	0	0	9.32836	21.2933	UBC
Human adenovirus 28 hypothetical protein 3 (gene: E4)	43846	0.102014	0.489303	0	0	9.32836	21.2933	B2M
Orf virus ORF007 dUTPase	43846	0.102014	0.488954	0	0	9.32836	21.2933	B2M
Human adenovirus E4 protein IIIa	43846	0.102014	0.488605	0	0	9.32836	21.2933	UBC
Human betaherpesvirus 5 membrane glycoprotein US3 (gene: US3)	43846	0.102014	0.488257	0	0	9.32836	21.2933	B2M
Human betaherpesvirus 5 envelope protein US28 (gene: US28)	43846	0.102014	0.487909	0	0	9.32836	21.2933	UBC
Human betaherpesvirus 6 U81, uracil-DNA glycosylase (gene: U81)	43846	0.102014	0.487562	0	0	9.32836	21.2933	RPS2
Human betaherpesvirus 6A uracil-DNA glycosylase (gene: U81)	43846	0.102014	0.487215	0	0	9.32836	21.2933	RPS2
WU Polyomavirus Small T antigen	43846	0.102014	0.486869	0	0	9.32836	21.2933	UBC
West Nile virus H442 membrane protein	43846	0.102014	0.486523	0	0	9.32836	21.2933	UBC
West Nile virus SA381/00 membrane protein	43846	0.102014	0.486178	0	0	9.32836	21.2933	UBC
West Nile virus SA93/01 membrane protein	43846	0.102014	0.485833	0	0	9.32836	21.2933	UBC
West Nile virus SPU116/89 membrane protein	43846	0.102014	0.485489	0	0	9.32836	21.2933	UBC
West Nile virus lineage 1 membrane glycoprotein M (gene: flavivirus polyprotein)	43846	0.102014	0.485145	0	0	9.32836	21.2933	UBC
Human mastadenovirus E capsid protein precursor pIIIa (gene: L1)	43846	0.102014	0.484801	0	0	9.32836	21.2933	UBC
Human papillomavirus 136 transforming protein (gene: E7)	43846	0.102014	0.484459	0	0	9.32836	21.2933	UBC
Human papillomavirus type 153 E7 protein (gene: E7)	43846	0.102014	0.484116	0	0	9.32836	21.2933	UBC
Human papillomavirus type 26 early protein (gene: E6)	43846	0.102014	0.483774	0	0	9.32836	21.2933	UBC
Human rhinovirus A25 2C	43846	0.102014	0.483433	0	0	9.32836	21.2933	UBC
Human rhinovirus A95 3D	43846	0.102014	0.483092	0	0	9.32836	21.2933	UBC
BK polyomavirus large T antigen	2/81	0.102632	0.485678	0	0	3.68528	8.38991	HSPA8;UBC
Molluscum contagiosum virus subtype 1 MC100R (gene: MC100L)	2/82	0.104755	0.495373	0	0	3.64033	8.21307	UBC;PABPC1
Vaccinia virus Ankara serine/threonine-protein kinase-like	2/82	0.104755	0.495024	0	0	3.64033	8.21307	HSPA8;UBC
Human papillomavirus type 119 regulatory protein E2 (gene: E2)	2/82	0.104755	0.494676	0	0	3.64033	8.21307	PABPC1;B2M
Ectromelia virus ERPV serine/threonine kinase	6/482	0.105577	0.498207	0	0	1.85793	4.17721	HSPA8;HSP90AB1;UBC;MYH9;PABPC1;B2M
Vaccinia virus Ankara Interleukin-1 beta receptor	3/170	0.106187	0.500732	0	0	2.63389	5.90665	TTR;UBC;B2M
Macacine alphaherpesvirus 1 large tegument protein (gene: UL36)	2/83	0.106889	0.503693	0	0	3.59648	8.04158	UBC;RPS27A
Yaba-like disease virus 49R protein (gene: 49R)	2/83	0.106889	0.50334	0	0	3.59648	8.04158	UBC;PABPC1
Human orthopneumovirus fusion protein (gene: F)	2/83	0.106889	0.502987	0	0	3.59648	8.04158	PABPC1;RPS2
Human papillomavirus type 67 E2	2/83	0.106889	0.502635	0	0	3.59648	8.04158	PABPC1;B2M
Igbo Ora virus envelope glycoprotein	43847	0.108035	0.507668	0	0	8.77963	19.5373	B2M
Chapare mammarenavirus Z protein	43847	0.108035	0.507313	0	0	8.77963	19.5373	B2M
KI polyomavirus Small T antigen	43847	0.108035	0.506958	0	0	8.77963	19.5373	UBC
Cowpox virus CPXV018 protein (gene: CPXV018 CDS)	43847	0.108035	0.506604	0	0	8.77963	19.5373	B2M
Middle East respiratory syndrome-related coronavirus nsp4 protein (gene: orf1ab)	43847	0.108035	0.506251	0	0	8.77963	19.5373	UBB
Middle East respiratory syndrome-related coronavirus nsp10 protein (gene: orf1ab)	43847	0.108035	0.505898	0	0	8.77963	19.5373	UBB
Ectromelia virus ERPV putative phosphotransferase anion transport protein	43847	0.108035	0.505545	0	0	8.77963	19.5373	HSPA8
Encephalomyocarditis virus protein 1C	43847	0.108035	0.505193	0	0	8.77963	19.5373	B2M
Hepatitis C virus subtype 1a p7 protein	43847	0.108035	0.504842	0	0	8.77963	19.5373	HSPA8
Human adenovirus 1 E4 ORF3	43847	0.108035	0.504491	0	0	8.77963	19.5373	B2M
Human adenovirus 16 19.3 kDa MHC class I antigen-binding glycoprotein precursor (gene: E3)	43847	0.108035	0.50414	0	0	8.77963	19.5373	B2M
Human adenovirus 2 E4 ORF3	43847	0.108035	0.50379	0	0	8.77963	19.5373	B2M
Human adenovirus 23 protease protein (gene: L3)	43847	0.108035	0.50344	0	0	8.77963	19.5373	UBC
Human adenovirus 3+7 19.3 kDa MHC class I antigen-binding glycoprotein precursor (gene: E3)	43847	0.108035	0.503091	0	0	8.77963	19.5373	B2M
Human adenovirus 31 DBP protein (gene: DBP)	43847	0.108035	0.502743	0	0	8.77963	19.5373	UBC
Human adenovirus 34 DNA polymerase (gene: E2B)	43847	0.108035	0.502394	0	0	8.77963	19.5373	UBC
Human adenovirus 5 E4 ORF3	43847	0.108035	0.502047	0	0	8.77963	19.5373	B2M
Human adenovirus 52 fiber-1	43847	0.108035	0.5017	0	0	8.77963	19.5373	B2M
Human adenovirus 6 nuclear binding protein (gene: E4)	43847	0.108035	0.501353	0	0	8.77963	19.5373	B2M
Human betaherpesvirus 6B putative virion protein (gene: U34)	43847	0.108035	0.501007	0	0	8.77963	19.5373	B2M
Human betaherpesvirus 7 nuclear egress lamina protein (gene: U37)	43847	0.108035	0.500661	0	0	8.77963	19.5373	B2M
Variola virus hypothetical protein (gene: J3R)	43847	0.108035	0.500316	0	0	8.77963	19.5373	UBC
Human mastadenovirus C control protein E4orf3 (gene: E4)	43847	0.108035	0.499971	0	0	8.77963	19.5373	B2M
Human rhinovirus A51 3D	43847	0.108035	0.499626	0	0	8.77963	19.5373	UBC
Human rhinovirus A56 2C	43847	0.108035	0.499283	0	0	8.77963	19.5373	UBC
Human adenovirus 11a IVa2	2/84	0.109036	0.503559	0	0	3.55366	7.8752	UBB;UBC
Monkeypox virus Zaire-96-I-16 D17L (gene: D17L)	2/85	0.111193	0.51317	0	0	3.51185	7.71373	UBC;B2M
Human adenovirus 65 E3 CR1-b	3/175	0.113228	0.5222	0	0	2.55864	5.57362	EEF1A1;UBC;B2M
Cercopithecine betaherpesvirus 5 membrane protein US12E (gene: US12E)	43848	0.114017	0.525478	0	0	8.29187	18.0051	UBC
Cowpox virus CPXV020 protein (gene: CPXV020 CDS)	43848	0.114017	0.525118	0	0	8.29187	18.0051	B2M
Kyasanur Forest disease virus NS5	43848	0.114017	0.524758	0	0	8.29187	18.0051	HSPA8
Cowpox virus CPXV197 protein (gene: CPXV197 CDS)	43848	0.114017	0.524398	0	0	8.29187	18.0051	GAPDH
Molluscum contagiosum virus subtype 1 MC026L (gene: MC026L)	43848	0.114017	0.524039	0	0	8.29187	18.0051	UBC
Great Island virus VP7	43848	0.114017	0.523681	0	0	8.29187	18.0051	B2M
Hantaan virus envelope glycoprotein G2 (see comment)	43848	0.114017	0.523323	0	0	8.29187	18.0051	B2M
Human adenovirus 1 protease	43848	0.114017	0.522966	0	0	8.29187	18.0051	UBC
Human adenovirus 11a L3 hexon-associated protein VI	43848	0.114017	0.522609	0	0	8.29187	18.0051	HSPA8
Human adenovirus 17 protease	43848	0.114017	0.522252	0	0	8.29187	18.0051	UBC
Human adenovirus 2 protease	43848	0.114017	0.521896	0	0	8.29187	18.0051	UBC
Human adenovirus 36 E4 ORF3	43848	0.114017	0.521541	0	0	8.29187	18.0051	B2M
Human adenovirus 52 DBP (gene: DBP)	43848	0.114017	0.521186	0	0	8.29187	18.0051	UBC
Human adenovirus 55 L3 pVI 26.6 kDa protein	43848	0.114017	0.520831	0	0	8.29187	18.0051	HSPA8
Human adenovirus 58 ORF3 (gene: E4)	43848	0.114017	0.520477	0	0	8.29187	18.0051	B2M
Orf virus ORF112 putative chemokine-binding protein	43848	0.114017	0.520123	0	0	8.29187	18.0051	B2M
Human adenovirus 6 adenain endoprotease 23 kDa protein (gene: L3)	43848	0.114017	0.51977	0	0	8.29187	18.0051	UBC
Powassan virus RNA-dependent RNA polymerase	43848	0.114017	0.519418	0	0	8.29187	18.0051	HSPA8
Reston ebolavirus minor nucleoprotein (gene: VP30)	43848	0.114017	0.519065	0	0	8.29187	18.0051	UBC
Reston ebolavirus - Reston VP30 (gene: VP30)	43848	0.114017	0.518714	0	0	8.29187	18.0051	UBC
Human adenovirus D8 pVI (gene: L3)	43848	0.114017	0.518363	0	0	8.29187	18.0051	HSPA8
Human betaherpesvirus 5 regulatory protein IE1 (gene: UL123)	43848	0.114017	0.518012	0	0	8.29187	18.0051	B2M
Human bocavirus VP1 (gene: VP1)	43848	0.114017	0.517662	0	0	8.29187	18.0051	B2M
Variola virus hypothetical protein (gene: C20L)	43848	0.114017	0.517312	0	0	8.29187	18.0051	GAPDH
Yaba-like disease virus 139R protein (gene: 139R)	43848	0.114017	0.516963	0	0	8.29187	18.0051	UBC
Human mastadenovirus C protease (gene: L3)	43848	0.114017	0.516614	0	0	8.29187	18.0051	UBC
Human parechovirus 8 VP3	43848	0.114017	0.516265	0	0	8.29187	18.0051	PABPC1
Human pegivirus 2 putative NS5A peptide	43848	0.114017	0.515917	0	0	8.29187	18.0051	B2M
Human rhinovirus A62 2C	43848	0.114017	0.51557	0	0	8.29187	18.0051	UBC
Human rhinovirus A77 2C	43848	0.114017	0.515223	0	0	8.29187	18.0051	UBC
Vaccinia virus Ankara 64.7k Kelch-like protein f1	3/176	0.114657	0.517767	0	0	2.5441	5.51004	HSPA8;UBC;B2M
Human betaherpesvirus 6B glycoprotein (gene: U85)	5/383	0.115214	0.519936	0	0	1.94848	4.21059	HSP90AB1;UBB;UBC;RPS27A;B2M
Vaccinia virus Ankara soluble and cell surface interferon-alpha/beta receptor	2/88	0.117733	0.530943	0	0	3.39213	7.25692	UBC;B2M
Vaccinia virus Ankara Kelch-like protein, modulator of inflammation	3/179	0.118985	0.536233	0	0	2.50146	5.32499	HSPA8;UBC;B2M
Cercopithecine alphaherpesvirus 2 ribonucleotide reductase subunit 2 (gene: UL40)	43849	0.119958	0.540254	0	0	7.85546	16.6584	FTH1
Monkeypox virus Zaire-96-I-16 E9R (gene: E9R)	43849	0.119958	0.539892	0	0	7.85546	16.6584	UBC
Norovirus Hu/GI/10360/2010/VNM 3C-like protease (gene: POL)	43849	0.119958	0.53953	0	0	7.85546	16.6584	HSP90AB1
Horsepox virus HSPV056 (Poxvirus F16 protein)	43849	0.119958	0.539169	0	0	7.85546	16.6584	GAPDH
Human adenovirus 1 pVI	43849	0.119958	0.538808	0	0	7.85546	16.6584	UBC
Human adenovirus 11+34 protein VI precursor (gene: L3)	43849	0.119958	0.538448	0	0	7.85546	16.6584	HSPA8
Human adenovirus 14 protein VI (gene: L3)	43849	0.119958	0.538088	0	0	7.85546	16.6584	HSPA8
Human adenovirus 16 protein VI precursor (gene: L3)	43849	0.119958	0.537729	0	0	7.85546	16.6584	HSPA8
Human adenovirus 18 protease protein (gene: L3)	43849	0.119958	0.53737	0	0	7.85546	16.6584	UBC
Human adenovirus 21a protein VI precursor (gene: L3)	43849	0.119958	0.537012	0	0	7.85546	16.6584	HSPA8
Human adenovirus 34 protein VI (gene: L3)	43849	0.119958	0.536654	0	0	7.85546	16.6584	HSPA8
Human adenovirus 35 pVI	43849	0.119958	0.536297	0	0	7.85546	16.6584	HSPA8
Human adenovirus 41 E4 hypothetical protein 3	43849	0.119958	0.53594	0	0	7.85546	16.6584	B2M
Human adenovirus 5 pVI	43849	0.119958	0.535584	0	0	7.85546	16.6584	UBC
Human adenovirus 50 protein VI (gene: L3)	43849	0.119958	0.535228	0	0	7.85546	16.6584	HSPA8
Human adenovirus 6 minor capsid protein precursor pVI (gene: L3)	43849	0.119958	0.534873	0	0	7.85546	16.6584	UBC
Human adenovirus 66 19.3 kDa MHC class I antigen-binding glycoprotein precursor (gene: E3)	43849	0.119958	0.534518	0	0	7.85546	16.6584	B2M
Human adenovirus 67 E4 ORF3	43849	0.119958	0.534163	0	0	7.85546	16.6584	B2M
SFTS virus HB29 Gc glycoprotein	43849	0.119958	0.533809	0	0	7.85546	16.6584	B2M
Sosuga virus V protein	43849	0.119958	0.533456	0	0	7.85546	16.6584	UBC
Titi monkey adenovirus ECC-2011 pVI	43849	0.119958	0.533103	0	0	7.85546	16.6584	HSPA8
Vaccinia virus hypothetical protein (gene: F16L)	43849	0.119958	0.53275	0	0	7.85546	16.6584	GAPDH
Vaccinia virus Ankara 19.0k hypothetical protein	43849	0.119958	0.532398	0	0	7.85546	16.6584	UBC
Vaccinia virus Ankara 26.5k hypothetical protein	43849	0.119958	0.532046	0	0	7.85546	16.6584	GAPDH
West Nile virus lineage 1 membrane glycoprotein precursor M (gene: flavivirus polyprotein)	43849	0.119958	0.531695	0	0	7.85546	16.6584	UBC
West Nile virus lineage 2 membrane glycoprotein precursor M (gene: flavivirus polyprotein)	43849	0.119958	0.531344	0	0	7.85546	16.6584	UBC
Human mastadenovirus F DNA polymerase (gene: E2B)	43849	0.119958	0.530994	0	0	7.85546	16.6584	PABPC1
Human papillomavirus type 45 early protein (gene: E6)	43849	0.119958	0.530644	0	0	7.85546	16.6584	B2M
Human rhinovirus A55 2C (P2-C)	43849	0.119958	0.530295	0	0	7.85546	16.6584	UBC
Human rhinovirus A58 2C	43849	0.119958	0.529946	0	0	7.85546	16.6584	UBC
Human rhinovirus B35 3D	43849	0.119958	0.529598	0	0	7.85546	16.6584	UBC
Human adenovirus 46 423R	2/90	0.122145	0.538899	0	0	3.31675	6.97362	UBC;B2M
Human adenovirus 71 E3 CR1-beta (gene: E3)	2/90	0.122145	0.538545	0	0	3.31675	6.97362	UBC;B2M
Human adenovirus 61 E3 CR1 beta	5/391	0.122746	0.54084	0	0	1.90862	4.00358	UBB;UBC;LCN2;MT-CO2;B2M
Human papillomavirus type 112 E2 protein (gene: E2)	2/91	0.124366	0.54762	0	0	3.2803	6.83787	PABPC1;B2M
Cercopithecine betaherpesvirus 5 membrane protein US18 (gene: US18)	43850	0.12586	0.553833	0	0	7.46269	15.4671	UBC
Junin mammarenavirus Z protein	43850	0.12586	0.55347	0	0	7.46269	15.4671	B2M
Cosavirus A 3D	43850	0.12586	0.553108	0	0	7.46269	15.4671	UBC
Lujo mammarenavirus multifunctional matrix-like protein	43850	0.12586	0.552746	0	0	7.46269	15.4671	B2M
Cowpox virus CPXV091 protein (gene: CPXV091 CDS)	43850	0.12586	0.552385	0	0	7.46269	15.4671	UBC
Macacine alphaherpesvirus 1 ribonucleotide reductase subunit 2 (gene: UL40)	43850	0.12586	0.552024	0	0	7.46269	15.4671	FTH1
Coxsackievirus A1 VP4	43850	0.12586	0.551664	0	0	7.46269	15.4671	UBC
Coxsackievirus A8 2C protein	43850	0.12586	0.551304	0	0	7.46269	15.4671	UBC
Dengue virus 2 nonstructural protein NS3 (gene: flavivirus polyprotein)	43850	0.12586	0.550945	0	0	7.46269	15.4671	AMBP
Eastern equine encephalitis virus p123 protein	43850	0.12586	0.550586	0	0	7.46269	15.4671	UBC
Monkeypox virus Zaire-96-I-16 R1R (gene: R1R)	43850	0.12586	0.550227	0	0	7.46269	15.4671	HSPA8
Monkeypox virus Zaire-96-I-16 glutaredoxin-like protein (gene: G4L)	43850	0.12586	0.549869	0	0	7.46269	15.4671	UBC
Ectromelia virus ERPV glutaredoxin 2	43850	0.12586	0.549512	0	0	7.46269	15.4671	UBC
Enterovirus A protein 2C	43850	0.12586	0.549155	0	0	7.46269	15.4671	UBC
Hepatitis C virus subtype 1b p7 protein	43850	0.12586	0.548798	0	0	7.46269	15.4671	HSPA8
Human adenovirus 1 pIIIa	43850	0.12586	0.548442	0	0	7.46269	15.4671	UBC
Human adenovirus 18 DNA binding protein (gene: E2A)	43850	0.12586	0.548086	0	0	7.46269	15.4671	UBC
Human adenovirus 19 ORF3 (gene: E4)	43850	0.12586	0.547731	0	0	7.46269	15.4671	B2M
Human adenovirus 2 pIIIa	43850	0.12586	0.547376	0	0	7.46269	15.4671	UBC
Human adenovirus 2 pVI	43850	0.12586	0.547022	0	0	7.46269	15.4671	UBC
Human adenovirus 21 protein VI precursor (gene: L3)	43850	0.12586	0.546668	0	0	7.46269	15.4671	HSPA8
Human adenovirus 3+7 protein VI precursor (gene: L3)	43850	0.12586	0.546315	0	0	7.46269	15.4671	HSPA8
Human adenovirus 5 pIIIa	43850	0.12586	0.545962	0	0	7.46269	15.4671	UBC
Human adenovirus 6 peripentonal hexon-associated pIIIa protein (gene: L1)	43850	0.12586	0.54561	0	0	7.46269	15.4671	UBC
Oropouche virus full_polyprotein 1..1420 (gene: M)	43850	0.12586	0.545258	0	0	7.46269	15.4671	B2M
Human adenovirus 66 peripentonal hexon associated protein IIIa precursor (gene: L1)	43850	0.12586	0.544906	0	0	7.46269	15.4671	UBC
Human adenovirus 66 protein VI precursor (gene: L3)	43850	0.12586	0.544555	0	0	7.46269	15.4671	HSPA8
Human adenovirus 68 protein VI precursor (gene: L3)	43850	0.12586	0.544204	0	0	7.46269	15.4671	HSPA8
Human adenovirus 7 pVI	43850	0.12586	0.543854	0	0	7.46269	15.4671	HSPA8
Human adenovirus 71 VI capsid protein (gene: L3)	43850	0.12586	0.543504	0	0	7.46269	15.4671	HSPA8
Human adenovirus 7d2 protein VI precursor (gene: L3)	43850	0.12586	0.543155	0	0	7.46269	15.4671	HSPA8
Human adenovirus 7d2 peripentonal hexon associated protein IIIa precursor (gene: L1)	43850	0.12586	0.542806	0	0	7.46269	15.4671	UBC
Human adenovirus B3 L3 protein pVI (gene: L3)	43850	0.12586	0.542458	0	0	7.46269	15.4671	HSPA8
Human adenovirus B3 L1 protein pIIIa (gene: L1)	43850	0.12586	0.54211	0	0	7.46269	15.4671	UBC
Vaccinia virus glutaredoxin-like protein (gene: G4L)	43850	0.12586	0.541762	0	0	7.46269	15.4671	UBC
Human betaherpesvirus 5 envelope protein UL78 (gene: UL78)	43850	0.12586	0.541415	0	0	7.46269	15.4671	UBC
Human gammaherpesvirus 4 capsid protein VP26 (gene: BFRF3)	43850	0.12586	0.541069	0	0	7.46269	15.4671	UBC
Western equine encephalitis virus ponstructural protein P123	43850	0.12586	0.540723	0	0	7.46269	15.4671	UBC
Human gammaherpesvirus 4 BCRF1 protein precursor (gene: BCRF1)	43850	0.12586	0.540377	0	0	7.46269	15.4671	HSPA8
Human herpesvirus 4 type 2 BCRF1	43850	0.12586	0.540032	0	0	7.46269	15.4671	HSPA8
Human herpesvirus 4 type 2 BFRF3	43850	0.12586	0.539687	0	0	7.46269	15.4671	UBC
Human mastadenovirus B capsid protein precursor pVI (gene: L3)	43850	0.12586	0.539342	0	0	7.46269	15.4671	HSPA8
Human mastadenovirus C capsid protein precursor pVI (gene: L3)	43850	0.12586	0.538998	0	0	7.46269	15.4671	UBC
Human mastadenovirus C capsid protein precursor pIIIa (gene: L1)	43850	0.12586	0.538655	0	0	7.46269	15.4671	UBC
Human mastadenovirus F fiber (gene: L5)	43850	0.12586	0.538312	0	0	7.46269	15.4671	B2M
Human papillomavirus 130 E7 (gene: E7)	43850	0.12586	0.537969	0	0	7.46269	15.4671	UBC
Human papillomavirus 132 E7 (gene: E7)	43850	0.12586	0.537627	0	0	7.46269	15.4671	UBC
Human rhinovirus A31 2C	43850	0.12586	0.537285	0	0	7.46269	15.4671	UBC
Human rhinovirus A45 1B	43850	0.12586	0.536944	0	0	7.46269	15.4671	B2M
Monkeypox virus IFN-alpha/beta-receptor-like secreted glycoprotein	2/92	0.126598	0.539748	0	0	3.24465	6.70585	UBC;B2M
Monkeypox virus Zaire-96-I-16 B16R (gene: B16R)	2/92	0.126598	0.539405	0	0	3.24465	6.70585	UBC;B2M
Human adenovirus 43 CR1-beta protein (gene: E3)	2/92	0.126598	0.539063	0	0	3.24465	6.70585	UBC;B2M
Papiine alphaherpesvirus 2 envelope glycoprotein D (gene: US6)	2/92	0.126598	0.538721	0	0	3.24465	6.70585	UBC;B2M
Horsepox virus HSPV187 (kelch-like protein; Provisional)	2/93	0.128838	0.547909	0	0	3.20976	6.57743	UBC;B2M
Monkeypox virus ser/thr kinase	6/512	0.130013	0.552556	0	0	1.74907	3.56831	HSPA8;HSP90AB1;UBC;MYH9;PABPC1;S100A9
Human adenovirus 22 50.0 kDa protein (gene: E3)	2/94	0.131088	0.556773	0	0	3.17561	6.45247	UBC;B2M
Ravn virus - Ravn, Kenya, 1987 glycoprotein (gene: GP)	2/94	0.131088	0.556421	0	0	3.17561	6.45247	HSPA8;UBC
Human rhinovirus QCE 3D	43851	0.131723	0.55876	0	0	7.10732	14.4069	UBC
Cercopithecine alphaherpesvirus 2 DNA polymerase processivity subunit (gene: UL42)	43851	0.131723	0.558407	0	0	7.10732	14.4069	UBC
Louping ill virus RNA-dependent RNA polymerase	43851	0.131723	0.558055	0	0	7.10732	14.4069	HSPA8
Coxsackievirus A6 VP4 protein	43851	0.131723	0.557703	0	0	7.10732	14.4069	UBC
Monkeypox virus Zaire-96-I-16 hypothetical protein (gene: C22L)	43851	0.131723	0.557351	0	0	7.10732	14.4069	GAPDH
New Jersey polyomavirus-2013 alternative T antigen	43851	0.131723	0.557	0	0	7.10732	14.4069	HSPA8
Hepatitis C virus genotype 5 p7 protein	43851	0.131723	0.55665	0	0	7.10732	14.4069	APOA1
Human T-cell leukemia virus type I p19 MA (gene: gag)	43851	0.131723	0.5563	0	0	7.10732	14.4069	UBC
Norovirus Hu/GII/BG1C0405/2012/BGD NTPase (gene: POL)	43851	0.131723	0.55595	0	0	7.10732	14.4069	UBC
Human adenovirus 16 peripentonal hexon associated protein IIIa precursor (gene: L1)	43851	0.131723	0.555601	0	0	7.10732	14.4069	UBC
Human adenovirus 18 protein VI (gene: L3)	43851	0.131723	0.555252	0	0	7.10732	14.4069	HSPA8
Human adenovirus 22 ORF3 (gene: E4)	43851	0.131723	0.554904	0	0	7.10732	14.4069	B2M
Human adenovirus 23 orf 3 protein (gene: E4)	43851	0.131723	0.554556	0	0	7.10732	14.4069	B2M
Human adenovirus 68 peripentonal hexon associated protein IIIa precursor (gene: L1)	43851	0.131723	0.554208	0	0	7.10732	14.4069	UBC
Human adenovirus 7 pIIIa	43851	0.131723	0.553861	0	0	7.10732	14.4069	UBC
Human adenovirus Chiba_E086/2012 DNA binding protein (gene: E2A)	43851	0.131723	0.553515	0	0	7.10732	14.4069	UBC
Vaccinia virus Ankara Glutaredoxin	43851	0.131723	0.553169	0	0	7.10732	14.4069	UBC
Human bocavirus WLL-2 VP1 (gene: VP1)	43851	0.131723	0.552823	0	0	7.10732	14.4069	B2M
Human cosavirus B 3D	43851	0.131723	0.552478	0	0	7.10732	14.4069	UBC
Human cosavirus E VP3	43851	0.131723	0.552133	0	0	7.10732	14.4069	B2M
Variola virus glutaredoxin-like protein (gene: H4L)	43851	0.131723	0.551788	0	0	7.10732	14.4069	UBC
Human gammaherpesvirus 8 ORF65 (gene: ORF65)	43851	0.131723	0.551444	0	0	7.10732	14.4069	UBC
Human mastadenovirus B capsid protein precursor pIIIa (gene: L1)	43851	0.131723	0.551101	0	0	7.10732	14.4069	UBC
Human mastadenovirus F control protein E4orf3 (gene: E4)	43851	0.131723	0.550758	0	0	7.10732	14.4069	B2M
Human papillomavirus 179 E1 protein (gene: E1)	43851	0.131723	0.550415	0	0	7.10732	14.4069	UBC
Human papillomavirus 197 E7 (gene: E7)	43851	0.131723	0.550073	0	0	7.10732	14.4069	UBC
Human papillomavirus 201 E1 (gene: E1)	43851	0.131723	0.549731	0	0	7.10732	14.4069	UBC
Human parechovirus 4 VP0	43851	0.131723	0.549389	0	0	7.10732	14.4069	B2M
Human rhinovirus B93 full_polyprotein 1..2178	2/95	0.133347	0.555821	0	0	3.14218	6.33086	UBC;B2M
Vaccinia virus IFN-alpha/beta-receptor-like secreted glycoprotein (gene: B19R)	2/95	0.133347	0.555476	0	0	3.14218	6.33086	UBC;B2M
Cercopithecine betaherpesvirus 5 chemokine vCXCL10 (gene: UL146G)	2/96	0.135615	0.564574	0	0	3.10945	6.21247	UBC;B2M
Human adenovirus 7d2 100 kDa hexon assembly-associated protein (gene: L4)	2/96	0.135615	0.564224	0	0	3.10945	6.21247	HSP90AB1;PABPC1
Cercopithecine betaherpesvirus 5 membrane protein US27B (gene: US27B)	3/191	0.136886	0.569157	0	0	2.3443	4.66189	HSPA8;MT-CO1;UBC
Cosavirus A VP3	43852	0.137546	0.571548	0	0	6.78426	13.4586	B2M
Louping ill virus putative enchored capsid (core) protein	43852	0.137546	0.571195	0	0	6.78426	13.4586	RPL13
Coxsackievirus A22 vp4	43852	0.137546	0.570842	0	0	6.78426	13.4586	UBC
Dengue virus 1 anchored capsid protein C (gene: flavivirus polyprotein)	43852	0.137546	0.570489	0	0	6.78426	13.4586	B2M
Modoc virus anchored capsid protein	43852	0.137546	0.570137	0	0	6.78426	13.4586	RPL13
Molluscum contagiosum virus subtype 1 MC066L (gene: MC066L)	43852	0.137546	0.569785	0	0	6.78426	13.4586	GPX1
Monkeypox virus Zaire-96-I-16 G7R (gene: G7R)	43852	0.137546	0.569434	0	0	6.78426	13.4586	UBC
HBV genotype C pol (gene: P)	43852	0.137546	0.569083	0	0	6.78426	13.4586	HSPA8
Hepacivirus C p7 protein	43852	0.137546	0.568733	0	0	6.78426	13.4586	B2M
Hepatitis C virus genotype 2 NS5A protein	43852	0.137546	0.568383	0	0	6.78426	13.4586	B2M
Hepatitis C virus genotype 3 NS5A protein	43852	0.137546	0.568033	0	0	6.78426	13.4586	B2M
Hepatitis C virus genotype 4 NS5A protein	43852	0.137546	0.567684	0	0	6.78426	13.4586	B2M
Hepatitis C virus genotype 5 NS5A protein	43852	0.137546	0.567335	0	0	6.78426	13.4586	B2M
Hepatitis C virus subtype 1b NS5A protein	43852	0.137546	0.566987	0	0	6.78426	13.4586	B2M
Horsepox virus HSPV074c (ribonucleoside--diphosphate reductase large subunit)	43852	0.137546	0.566639	0	0	6.78426	13.4586	UBC
Human adenovirus 3+7 DNA polymerase (gene: E2B)	43852	0.137546	0.566292	0	0	6.78426	13.4586	UBC
Human adenovirus 31 pVI protein (gene: pVI)	43852	0.137546	0.565945	0	0	6.78426	13.4586	HSPA8
Human adenovirus 35 DBP	43852	0.137546	0.565598	0	0	6.78426	13.4586	UBC
Human adenovirus 54 13.6 kDa protein	43852	0.137546	0.565252	0	0	6.78426	13.4586	B2M
Human adenovirus 61 L3 pVI	43852	0.137546	0.564906	0	0	6.78426	13.4586	HSPA8
Human adenovirus D8 13.6kDa protein (gene: E4)	43852	0.137546	0.564561	0	0	6.78426	13.4586	B2M
Human alphaherpesvirus 1 DNA polymerase processivity subunit (gene: UL42)	43852	0.137546	0.564216	0	0	6.78426	13.4586	UBC
Human bocavirus 1 capsid protein	43852	0.137546	0.563872	0	0	6.78426	13.4586	B2M
Human bocavirus isolate SH1 VP1	43852	0.137546	0.563528	0	0	6.78426	13.4586	B2M
Yaba monkey tumor virus putative host range protein	43852	0.137546	0.563184	0	0	6.78426	13.4586	B2M
Human genital-associated circular DNA virus-1 RepA	43852	0.137546	0.562841	0	0	6.78426	13.4586	UBC
Human papillomavirus 120 putative E7 protein (gene: E7)	43852	0.137546	0.562498	0	0	6.78426	13.4586	UBC
Human papillomavirus 146 transforming protein (gene: E7)	43852	0.137546	0.562156	0	0	6.78426	13.4586	UBC
Human papillomavirus 155 E7	43852	0.137546	0.561814	0	0	6.78426	13.4586	UBC
Human papillomavirus type 6b E7 protein (gene: E7)	43852	0.137546	0.561472	0	0	6.78426	13.4586	UBC
Human papillomavirus type 96 E1	43852	0.137546	0.561131	0	0	6.78426	13.4586	B2M
Human parechovirus 1 2C	43852	0.137546	0.56079	0	0	6.78426	13.4586	HSPA8
Human parechovirus 4 capsid protein 1AB	43852	0.137546	0.56045	0	0	6.78426	13.4586	B2M
Human rhinovirus A23 2C (P2-C)	43852	0.137546	0.56011	0	0	6.78426	13.4586	UBC
Human rhinovirus A45 2C	43852	0.137546	0.559771	0	0	6.78426	13.4586	UBC
Human rhinovirus A46 1D (VP1)	43852	0.137546	0.559432	0	0	6.78426	13.4586	UBC
Horsepox virus HSPV195 (immunoglobulin like protein)	2/97	0.137892	0.5605	0	0	3.0774	6.09719	UBC;B2M
Papiine alphaherpesvirus 2 DNA replication origin-binding helicase (gene: UL9)	2/97	0.137892	0.560161	0	0	3.0774	6.09719	HSPA8;UBC
Variola virus hypothetical protein (gene: B20R)	2/97	0.137892	0.559822	0	0	3.0774	6.09719	UBC;B2M
Vaccinia virus ser/thr kinase (gene: B1R)	3/193	0.139956	0.567856	0	0	2.32001	4.56213	HSPA8;HSP90AB1;B2M
Vaccinia virus Ankara Serine/threonine-protein kinase	3/193	0.139956	0.567513	0	0	2.32001	4.56213	HSPA8;HSP90AB1;B2M
Monkeypox virus Zaire-96-I-16 D16L (gene: D16L)	2/98	0.140177	0.568069	0	0	3.04599	5.98491	UBC;B2M
Human papillomavirus type 52 early protein (gene: E2)	2/98	0.140177	0.567727	0	0	3.04599	5.98491	PABPC1;B2M
Cowpox virus CPXV193 protein (gene: CPXV193 CDS)	3/194	0.141499	0.572734	0	0	2.30805	4.5133	HSPA8;HSP90AB1;UBC
Cowpox virus CPXV204 protein (gene: CPXV204 CDS)	2/99	0.142471	0.57632	0	0	3.01523	5.87553	HSPA8;UBC
Cercopithecine alphaherpesvirus 2 envelope glycoprotein G (gene: US4)	43853	0.143331	0.57945	0	0	6.48929	12.6061	UBC
Cercopithecine betaherpesvirus 5 membrane protein RL11J (gene: RL11J)	43853	0.143331	0.579102	0	0	6.48929	12.6061	B2M
Cercopithecine betaherpesvirus 5 uracil-DNA glycosylase (gene: UL114)	43853	0.143331	0.578753	0	0	6.48929	12.6061	RPS2
Mengo virus 1D	43853	0.143331	0.578406	0	0	6.48929	12.6061	B2M
Molluscum contagiosum virus subtype 1 MC021L (gene: MC021L)	43853	0.143331	0.578058	0	0	6.48929	12.6061	B2M
Monkeypox virus Zaire-96-I-16 hypothetical protein (gene: B4R)	43853	0.143331	0.577711	0	0	6.48929	12.6061	GAPDH
Monkeypox virus Zaire-96-I-16 Tumor necrosis Factor-receptor like protein (gene: K1R)	43853	0.143331	0.577365	0	0	6.48929	12.6061	B2M
Enterovirus D NTPase 2C	43853	0.143331	0.577018	0	0	6.48929	12.6061	UBC
Human T-cell lymphotropic virus type 2b gag	43853	0.143331	0.576673	0	0	6.48929	12.6061	UBC
Human adenovirus 31 protease (gene: protease)	43853	0.143331	0.576327	0	0	6.48929	12.6061	UBC
Human adenovirus 46 ORF5(6)	43853	0.143331	0.575983	0	0	6.48929	12.6061	B2M
Human adenovirus 5 DBP	43853	0.143331	0.575638	0	0	6.48929	12.6061	UBC
Human adenovirus 56 Orf 3 protein (gene: E4)	43853	0.143331	0.575294	0	0	6.48929	12.6061	B2M
Human adenovirus 61 L3 Protease	43853	0.143331	0.57495	0	0	6.48929	12.6061	UBC
Human adenovirus 63 Orf 3 protein (gene: E4)	43853	0.143331	0.574607	0	0	6.48929	12.6061	B2M
Human adenovirus 64 E4 13.5 kDa protein	43853	0.143331	0.574264	0	0	6.48929	12.6061	B2M
Human adenovirus Chiba_E086/2012 Orf3 (gene: E4)	43853	0.143331	0.573922	0	0	6.48929	12.6061	B2M
Human adenovirus D10 Orf3 protein (gene: E4)	43853	0.143331	0.57358	0	0	6.48929	12.6061	B2M
Human adenovirus D37 13.6 kDa (gene: E4)	43853	0.143331	0.573238	0	0	6.48929	12.6061	B2M
Human betaherpesvirus 6 LJ1 (gene: LJ1)	43853	0.143331	0.572897	0	0	6.48929	12.6061	UBC
Human immunodeficiency virus 1 p66 subunit (gene: gag-pol)	43853	0.143331	0.572556	0	0	6.48929	12.6061	B2M
Human mastadenovirus A pol	43853	0.143331	0.572216	0	0	6.48929	12.6061	EEF1G
Human mastadenovirus D control protein E4orf3 (gene: E4)	43853	0.143331	0.571876	0	0	6.48929	12.6061	B2M
Human mastadenovirus F single-stranded DNA-binding protein (gene: E2A)	43853	0.143331	0.571536	0	0	6.48929	12.6061	UBC
Human papillomavirus 109 E1 protein (gene: E1)	43853	0.143331	0.571197	0	0	6.48929	12.6061	UBC
Human papillomavirus 123 transforming protein E7 (gene: E7)	43853	0.143331	0.570858	0	0	6.48929	12.6061	UBC
Human papillomavirus type 16 E1 (gene: E1)	43853	0.143331	0.57052	0	0	6.48929	12.6061	UBC
Human papillomavirus type 16 replication protein E1 (gene: E1)	43853	0.143331	0.570182	0	0	6.48929	12.6061	UBC
Human papillomavirus type 68a E6 protein	43853	0.143331	0.569844	0	0	6.48929	12.6061	B2M
Human papillomavirus type 88 E7 protein	43853	0.143331	0.569507	0	0	6.48929	12.6061	UBC
Ectromelia virus ERPV IFN alpha/beta receptor	2/100	0.144772	0.574894	0	0	2.98507	5.76894	UBC;B2M
Human betaherpesvirus 5 membrane glycoprotein UL11 (gene: UL11)	2/100	0.144772	0.574554	0	0	2.98507	5.76894	UBC;B2M
Variola virus hypothetical protein (gene: C7L)	2/100	0.144772	0.574215	0	0	2.98507	5.76894	UBC;B2M
Horsepox virus HSPV050 (Ser/Thr kinase; Provisional)	5/414	0.14563	0.577277	0	0	1.80258	3.473	HSPA8;UBC;MYH9;PABPC1;B2M
Vaccinia virus Ankara Serine/threonine-protein kinase 2	5/414	0.14563	0.576937	0	0	1.80258	3.473	HSPA8;UBC;MYH9;PABPC1;B2M
Macacine alphaherpesvirus 1 envelope glycoprotein C (gene: UL44)	3/197	0.146164	0.57871	0	0	2.2729	4.37084	C3;UBC;B2M
Horsepox virus HSPV179 (Serine/Threonine protein kinase, Vaccinia Related Kinase)	3/197	0.146164	0.578369	0	0	2.2729	4.37084	HSPA8;HSP90AB1;B2M
Enterovirus A VP1 (1D)	43854	0.149077	0.589548	0	0	6.21891	11.8364	UBC
Enterovirus A VP2 (1B)	43854	0.149077	0.589201	0	0	6.21891	11.8364	B2M
Enterovirus H ATPase	43854	0.149077	0.588855	0	0	6.21891	11.8364	UBC
Hepatitis C virus (isolate 6a33) putative NS5A protein	43854	0.149077	0.588509	0	0	6.21891	11.8364	B2M
Norovirus Hu/GII.3/HK71/1978/CHN 3C-like protease (gene: POL)	43854	0.149077	0.588163	0	0	6.21891	11.8364	HSP90AB1
Hepatitis C virus genotype 6 NS5A protein	43854	0.149077	0.587817	0	0	6.21891	11.8364	B2M
Norovirus Hu/GII.4/CHDC5191/1974/USA 3C-like protease (gene: POL)	43854	0.149077	0.587472	0	0	6.21891	11.8364	HSP90AB1
Norovirus Hu/GII.4/HS288/2012/USA 3C-like protease (gene: POL)	43854	0.149077	0.587128	0	0	6.21891	11.8364	HSP90AB1
Norovirus Hu/GII.4/NIHIC13/2011/USA 3C-like protease (gene: POL)	43854	0.149077	0.586784	0	0	6.21891	11.8364	HSP90AB1
Norovirus Hu/GII.4/NIHIC18.1/2012/USA 3C-like protease (gene: POL)	43854	0.149077	0.58644	0	0	6.21891	11.8364	HSP90AB1
Norovirus Hu/GII.4/NIHIC27.1/2012/USA 3C-like protease (gene: POL)	43854	0.149077	0.586097	0	0	6.21891	11.8364	HSP90AB1
Norovirus Hu/GII.4/NIHIC27.2/2012/USA 3C-like protease (gene: POL)	43854	0.149077	0.585754	0	0	6.21891	11.8364	HSP90AB1
Norovirus Hu/GII.6/CHDC4073/1984/USA 3C-like protease (gene: POL)	43854	0.149077	0.585411	0	0	6.21891	11.8364	HSP90AB1
Norovirus Hu/GII.6/HS245/2010/USA 3C-like protease (gene: POL)	43854	0.149077	0.585069	0	0	6.21891	11.8364	HSP90AB1
Human T-lymphotropic virus 2 hypothetical protein (gag polyprotein)	43854	0.149077	0.584727	0	0	6.21891	11.8364	UBC
Norovirus Hu/GII/20469/2010/VNM 3C-like protease (gene: POL)	43854	0.149077	0.584386	0	0	6.21891	11.8364	HSP90AB1
Norovirus Hu/GII/20477/2010/VNM 3C-like protease (gene: POL)	43854	0.149077	0.584045	0	0	6.21891	11.8364	HSP90AB1
Norovirus Hu/GII/BG1C0004/2010/BGD 3C-like protease (gene: POL)	43854	0.149077	0.583704	0	0	6.21891	11.8364	HSP90AB1
Norovirus Hu/GII/BG1C0066/2011/BGD 3C-like protease (gene: POL)	43854	0.149077	0.583364	0	0	6.21891	11.8364	HSP90AB1
Norovirus Hu/GII/BG1C0204/2011/BGD 3C-like protease (gene: POL)	43854	0.149077	0.583024	0	0	6.21891	11.8364	HSP90AB1
Norovirus Hu/GII/BG1C0241-33/2011/BGD 3C-like protease (gene: POL)	43854	0.149077	0.582685	0	0	6.21891	11.8364	HSP90AB1
Norovirus Hu/GII/BG1C0270/2011/BGD 3C-like protease (gene: POL)	43854	0.149077	0.582346	0	0	6.21891	11.8364	HSP90AB1
Norovirus Hu/GII/BG1C0282/2011/BGD 3C-like protease (gene: POL)	43854	0.149077	0.582008	0	0	6.21891	11.8364	HSP90AB1
Norovirus Hu/GII/BG1C0317/2011/BGD 3C-like protease (gene: POL)	43854	0.149077	0.581669	0	0	6.21891	11.8364	HSP90AB1
Norovirus Hu/GII/BG1C0405/2012/BGD 3C-like protease (gene: POL)	43854	0.149077	0.581332	0	0	6.21891	11.8364	HSP90AB1
Human adenovirus 2 DBP	43854	0.149077	0.580994	0	0	6.21891	11.8364	UBC
Norovirus Hu/Norwalk/10285/2010/VNM 3C-like protease (gene: POL)	43854	0.149077	0.580657	0	0	6.21891	11.8364	HSP90AB1
Norovirus Hu/Norwalk/10313/2010/VNM 3C-like protease (gene: POL)	43854	0.149077	0.580321	0	0	6.21891	11.8364	HSP90AB1
Norovirus Hu/Norwalk/10325/2010/VNM 3C-like protease (gene: POL)	43854	0.149077	0.579984	0	0	6.21891	11.8364	HSP90AB1
Norovirus Hu/Norwalk/10328/2010/VNM 3C-like protease (gene: POL)	43854	0.149077	0.579649	0	0	6.21891	11.8364	HSP90AB1
Norovirus Hu/Norwalk/10368/2010/VNM 3C-like protease (gene: POL)	43854	0.149077	0.579313	0	0	6.21891	11.8364	HSP90AB1
Norovirus Hu/Norwalk/10378/2010/VNM 3C-like protease (gene: POL)	43854	0.149077	0.578978	0	0	6.21891	11.8364	HSP90AB1
Norovirus Hu/Norwalk/10386/2010/VNM 3C-like protease (gene: POL)	43854	0.149077	0.578643	0	0	6.21891	11.8364	HSP90AB1
Human adenovirus 50 18.4 kDa protein (gene: E3)	43854	0.149077	0.578309	0	0	6.21891	11.8364	B2M
Human adenovirus 6 DBP 59 kDa protein (gene: E2A)	43854	0.149077	0.577975	0	0	6.21891	11.8364	UBC
Human adenovirus 61 E2A DNA binding protein	43854	0.149077	0.577642	0	0	6.21891	11.8364	UBC
Human adenovirus 65 E4 ORF3	43854	0.149077	0.577309	0	0	6.21891	11.8364	B2M
Rio Bravo virus RNA-dependent RNA polymerase	43854	0.149077	0.576976	0	0	6.21891	11.8364	HSPA8
Human adenovirus E4 E2A DNA binding protein	43854	0.149077	0.576643	0	0	6.21891	11.8364	UBC
Human alphaherpesvirus 2 DNA polymerase processivity subunit (gene: UL42)	43854	0.149077	0.576311	0	0	6.21891	11.8364	UBC
Tai Forest ebolavirus minor nucleoprotein (gene: VP30)	43854	0.149077	0.57598	0	0	6.21891	11.8364	UBC
Titi monkey adenovirus ECC-2011 DBP	43854	0.149077	0.575649	0	0	6.21891	11.8364	UBC
Titi monkey adenovirus ECC-2011 pIIIa	43854	0.149077	0.575318	0	0	6.21891	11.8364	HSPA8
Human betaherpesvirus 5 nuclear egress lamina protein (gene: UL53)	43854	0.149077	0.574987	0	0	6.21891	11.8364	B2M
Human betaherpesvirus 6 U94, Rep (gene: U94)	43854	0.149077	0.574657	0	0	6.21891	11.8364	B2M
Human betaherpesvirus 6A protein U94/rep (gene: U94)	43854	0.149077	0.574328	0	0	6.21891	11.8364	B2M
Human betaherpesvirus 6A protein DR1 (gene: DR1)	43854	0.149077	0.573998	0	0	6.21891	11.8364	HSPA8
Human betaherpesvirus 6B G-protein coupled receptor fragment (gene: U12)	43854	0.149077	0.573669	0	0	6.21891	11.8364	UBC
Vaccinia virus Ankara Major EEV envelope protein	43854	0.149077	0.573341	0	0	6.21891	11.8364	B2M
Human gammaherpesvirus 8 ORF69	43854	0.149077	0.573013	0	0	6.21891	11.8364	B2M
Human mastadenovirus C single-stranded DNA-binding protein (gene: E2A)	43854	0.149077	0.572685	0	0	6.21891	11.8364	UBC
Human mastadenovirus E single-stranded DNA-binding protein (gene: E2A)	43854	0.149077	0.572357	0	0	6.21891	11.8364	UBC
Human papillomavirus 171 E7	43854	0.149077	0.57203	0	0	6.21891	11.8364	UBC
Human papillomavirus 178 E7 protein (gene: E7)	43854	0.149077	0.571704	0	0	6.21891	11.8364	UBC
Human papillomavirus type 16 protein E6* (gene: E6)	43854	0.149077	0.571377	0	0	6.21891	11.8364	UBC
Human papillomavirus type 6 E7 (gene: E7)	43854	0.149077	0.571051	0	0	6.21891	11.8364	UBC
Human papillomavirus type 68 E6 (gene: E6)	43854	0.149077	0.570726	0	0	6.21891	11.8364	B2M
Human papillomavirus type 68b E6 protein (gene: E6)	43854	0.149077	0.570401	0	0	6.21891	11.8364	B2M
Human parechovirus 8 2C	43854	0.149077	0.570076	0	0	6.21891	11.8364	UBC
Human rhinovirus A50 1B	43854	0.149077	0.569751	0	0	6.21891	11.8364	B2M
Human rhinovirus A65 2C	43854	0.149077	0.569427	0	0	6.21891	11.8364	UBC
Human rhinovirus A76 2C	43854	0.149077	0.569103	0	0	6.21891	11.8364	UBC
Human rhinovirus B26 2C	43854	0.149077	0.56878	0	0	6.21891	11.8364	UBC
Human rhinovirus B37 full_polyprotein 1..2178	2/102	0.149398	0.569682	0	0	2.92654	5.56376	UBC;B2M
Rotavirus A NSP3 (gene: NSP3)	2/103	0.151723	0.578217	0	0	2.89813	5.46501	HSPA8;UBC
Horsepox virus HSPV177 (Immunoglobulin like)	6/538	0.153207	0.583543	0	0	1.66454	3.12262	UBB;AMBP;UBC;RPL13;RPS27A;B2M
Human papillomavirus type 27 early protein (gene: E2)	2/104	0.154054	0.586437	0	0	2.87026	5.36869	PABPC1;B2M
Human rhinovirus B84 2C	43855	0.154785	0.588885	0	0	5.97015	11.1386	UBC
Influenza A virus (A/Hong Kong/1073/99(H9N2)) Hemagglutinin (gene: ha)	43855	0.154785	0.588552	0	0	5.97015	11.1386	B2M
Middle East respiratory syndrome-related coronavirus nsp13 protein (gene: orf1ab)	43855	0.154785	0.588219	0	0	5.97015	11.1386	UBB
Echovirus E31 2C	43855	0.154785	0.587886	0	0	5.97015	11.1386	UBC
Hepacivirus C NS5A protein	43855	0.154785	0.587554	0	0	5.97015	11.1386	B2M
Hepatitis C virus genotype 2 E1 protein	43855	0.154785	0.587222	0	0	5.97015	11.1386	B2M
Norovirus Hu/GII.4/20199/2009/VNM 3C-like protease (gene: POL)	43855	0.154785	0.58689	0	0	5.97015	11.1386	HSP90AB1
Norovirus Hu/GII.4/HS292/2012/USA 3C-like protease (gene: POL)	43855	0.154785	0.586559	0	0	5.97015	11.1386	HSP90AB1
Norovirus Hu/GII.4/HS66/2001/USA 3C-like protease (gene: POL)	43855	0.154785	0.586228	0	0	5.97015	11.1386	HSP90AB1
Norovirus Hu/GII.4/NIHIC1.13/2012/USA 3C-like protease (gene: POL)	43855	0.154785	0.585898	0	0	5.97015	11.1386	HSP90AB1
Norovirus Hu/GII.4/NIHIC1.16/2012/USA 3C-like protease (gene: POL)	43855	0.154785	0.585568	0	0	5.97015	11.1386	HSP90AB1
Norovirus Hu/GII.4/NIHIC17.8/2013/USA 3C-like protease (gene: POL)	43855	0.154785	0.585238	0	0	5.97015	11.1386	HSP90AB1
Norovirus Hu/GII.4/NIHIC17.9/2013/USA 3C-like protease (gene: POL)	43855	0.154785	0.584909	0	0	5.97015	11.1386	HSP90AB1
Norovirus Hu/GII.4/NIHIC2.2/2010/USA 3C-like protease (gene: POL)	43855	0.154785	0.58458	0	0	5.97015	11.1386	HSP90AB1
Norovirus Hu/GII.4/NIHIC2.3/2010/USA 3C-like protease (gene: POL)	43855	0.154785	0.584251	0	0	5.97015	11.1386	HSP90AB1
Norovirus Hu/GII.4/NIHIC28.4/2012/USA 3C-like protease (gene: POL)	43855	0.154785	0.583923	0	0	5.97015	11.1386	HSP90AB1
Norovirus Hu/GII.4/NIHIC28.5/2012/USA 3C-like protease (gene: POL)	43855	0.154785	0.583595	0	0	5.97015	11.1386	HSP90AB1
Norovirus Hu/GII/10002/2009/VNM 3C-like protease (gene: POL)	43855	0.154785	0.583267	0	0	5.97015	11.1386	HSP90AB1
Norovirus Hu/GII/10003/2009/VNM 3C-like protease (gene: POL)	43855	0.154785	0.58294	0	0	5.97015	11.1386	HSP90AB1
Norovirus Hu/GII/10012/2009/VNM 3C-like protease (gene: POL)	43855	0.154785	0.582613	0	0	5.97015	11.1386	HSP90AB1
Norovirus Hu/GII/10037/2009/VNM 3C-like protease (gene: POL)	43855	0.154785	0.582287	0	0	5.97015	11.1386	HSP90AB1
Human adenovirus 12 virus encoded endoprotease (Late protein 3)	43855	0.154785	0.581961	0	0	5.97015	11.1386	UBC
Norovirus Hu/Norwalk/10034/2009/VNM 3C-like protease (gene: POL)	43855	0.154785	0.581635	0	0	5.97015	11.1386	HSP90AB1
Norovirus Hu/Norwalk/10051/2009/VNM 3C-like protease (gene: POL)	43855	0.154785	0.58131	0	0	5.97015	11.1386	HSP90AB1
Norovirus Hu/Norwalk/10054/2009/VNM 3C-like protease (gene: POL)	43855	0.154785	0.580985	0	0	5.97015	11.1386	HSP90AB1
Norovirus Hu/Norwalk/10062/2009/VNM 3C-like protease (gene: POL)	43855	0.154785	0.580661	0	0	5.97015	11.1386	HSP90AB1
Norovirus Hu/Norwalk/10074/2009/VNM 3C-like protease (gene: POL)	43855	0.154785	0.580336	0	0	5.97015	11.1386	HSP90AB1
Norovirus Hu/Norwalk/10075/2009/VNM 3C-like protease (gene: POL)	43855	0.154785	0.580013	0	0	5.97015	11.1386	HSP90AB1
Norovirus Hu/Norwalk/10078/2009/VNM 3C-like protease (gene: POL)	43855	0.154785	0.579689	0	0	5.97015	11.1386	HSP90AB1
Norovirus Hu/Norwalk/10079/2009/VNM 3C-like protease (gene: POL)	43855	0.154785	0.579366	0	0	5.97015	11.1386	HSP90AB1
Norovirus Hu/Norwalk/10110/2009/VNM 3C-like protease (gene: POL)	43855	0.154785	0.579043	0	0	5.97015	11.1386	HSP90AB1
Norovirus Hu/Norwalk/10114/2009/VNM 3C-like protease (gene: POL)	43855	0.154785	0.578721	0	0	5.97015	11.1386	HSP90AB1
Norovirus Hu/Norwalk/10116/2009/VNM 3C-like protease (gene: POL)	43855	0.154785	0.578399	0	0	5.97015	11.1386	HSP90AB1
Norovirus Hu/Norwalk/10129/2009/VNM 3C-like protease (gene: POL)	43855	0.154785	0.578077	0	0	5.97015	11.1386	HSP90AB1
Norovirus Hu/Norwalk/10136/2009/VNM 3C-like protease (gene: POL)	43855	0.154785	0.577756	0	0	5.97015	11.1386	HSP90AB1
Norovirus Hu/Norwalk/10137/2009/VNM 3C-like protease (gene: POL)	43855	0.154785	0.577435	0	0	5.97015	11.1386	HSP90AB1
Norovirus Hu/Norwalk/10145/2009/VNM 3C-like protease (gene: POL)	43855	0.154785	0.577114	0	0	5.97015	11.1386	HSP90AB1
Norovirus Hu/Norwalk/10148/2009/VNM 3C-like protease (gene: POL)	43855	0.154785	0.576794	0	0	5.97015	11.1386	HSP90AB1
Norovirus Hu/Norwalk/10158/2009/VNM 3C-like protease (gene: POL)	43855	0.154785	0.576474	0	0	5.97015	11.1386	HSP90AB1
Norovirus Hu/Norwalk/10160/2009/VNM 3C-like protease (gene: POL)	43855	0.154785	0.576154	0	0	5.97015	11.1386	HSP90AB1
Norovirus Hu/Norwalk/10162/2009/VNM 3C-like protease (gene: POL)	43855	0.154785	0.575835	0	0	5.97015	11.1386	HSP90AB1
Norovirus Hu/Norwalk/10163/2009/VNM 3C-like protease (gene: POL)	43855	0.154785	0.575516	0	0	5.97015	11.1386	HSP90AB1
Norovirus Hu/Norwalk/10169/2009/VNM 3C-like protease (gene: POL)	43855	0.154785	0.575198	0	0	5.97015	11.1386	HSP90AB1
Norovirus Hu/Norwalk/10173/2009/VNM 3C-like protease (gene: POL)	43855	0.154785	0.57488	0	0	5.97015	11.1386	HSP90AB1
Norovirus Hu/Norwalk/10176/2009/VNM 3C-like protease (gene: POL)	43855	0.154785	0.574562	0	0	5.97015	11.1386	HSP90AB1
Norovirus Hu/Norwalk/10177/2009/VNM 3C-like protease (gene: POL)	43855	0.154785	0.574244	0	0	5.97015	11.1386	HSP90AB1
Norovirus Hu/Norwalk/10179/2009/VNM 3C-like protease (gene: POL)	43855	0.154785	0.573927	0	0	5.97015	11.1386	HSP90AB1
Norovirus Hu/Norwalk/10182/2009/VNM 3C-like protease (gene: POL)	43855	0.154785	0.573611	0	0	5.97015	11.1386	HSP90AB1
Norovirus Hu/Norwalk/10183/2009/VNM 3C-like protease (gene: POL)	43855	0.154785	0.573294	0	0	5.97015	11.1386	HSP90AB1
Norovirus Hu/Norwalk/10194/2009/VNM 3C-like protease (gene: POL)	43855	0.154785	0.572978	0	0	5.97015	11.1386	HSP90AB1
Norovirus Hu/Norwalk/10199/2009/VNM 3C-like protease (gene: POL)	43855	0.154785	0.572662	0	0	5.97015	11.1386	HSP90AB1
Norovirus Hu/Norwalk/10203/2009/VNM 3C-like protease (gene: POL)	43855	0.154785	0.572347	0	0	5.97015	11.1386	HSP90AB1
Norovirus Hu/Norwalk/10204/2009/VNM 3C-like protease (gene: POL)	43855	0.154785	0.572032	0	0	5.97015	11.1386	HSP90AB1
Norovirus Hu/Norwalk/10222/2009/VNM 3C-like protease (gene: POL)	43855	0.154785	0.571718	0	0	5.97015	11.1386	HSP90AB1
Norovirus Hu/Norwalk/10223/2009/VNM 3C-like protease (gene: POL)	43855	0.154785	0.571403	0	0	5.97015	11.1386	HSP90AB1
Norovirus Hu/Norwalk/10235/2009/VNM 3C-like protease (gene: POL)	43855	0.154785	0.571089	0	0	5.97015	11.1386	HSP90AB1
Norovirus Hu/Norwalk/10236/2009/VNM 3C-like protease (gene: POL)	43855	0.154785	0.570776	0	0	5.97015	11.1386	HSP90AB1
Norovirus Hu/Norwalk/10238/2009/VNM 3C-like protease (gene: POL)	43855	0.154785	0.570462	0	0	5.97015	11.1386	HSP90AB1
Norovirus Hu/Norwalk/10247/2009/VNM 3C-like protease (gene: POL)	43855	0.154785	0.570149	0	0	5.97015	11.1386	HSP90AB1
Norovirus Hu/Norwalk/10255/2009/VNM 3C-like protease (gene: POL)	43855	0.154785	0.569837	0	0	5.97015	11.1386	HSP90AB1
Norovirus Hu/Norwalk/10296/2010/VNM 3C-like protease (gene: POL)	43855	0.154785	0.569525	0	0	5.97015	11.1386	HSP90AB1
Norovirus Hu/Norwalk/20008/2009/VNM 3C-like protease (gene: POL)	43855	0.154785	0.569213	0	0	5.97015	11.1386	HSP90AB1
Norovirus Hu/Norwalk/20010/2009/VNM 3C-like protease (gene: POL)	43855	0.154785	0.568901	0	0	5.97015	11.1386	HSP90AB1
Norovirus Hu/Norwalk/20014/2009/VNM 3C-like protease (gene: POL)	43855	0.154785	0.56859	0	0	5.97015	11.1386	HSP90AB1
Norovirus Hu/Norwalk/20016/2009/VNM 3C-like protease (gene: POL)	43855	0.154785	0.568279	0	0	5.97015	11.1386	HSP90AB1
Norovirus Hu/Norwalk/20019/2009/VNM 3C-like protease (gene: POL)	43855	0.154785	0.567969	0	0	5.97015	11.1386	HSP90AB1
Norovirus Hu/Norwalk/20033/2009/VNM 3C-like protease (gene: POL)	43855	0.154785	0.567658	0	0	5.97015	11.1386	HSP90AB1
Norovirus Hu/Norwalk/20035/2009/VNM 3C-like protease (gene: POL)	43855	0.154785	0.567348	0	0	5.97015	11.1386	HSP90AB1
Norovirus Hu/Norwalk/20044/2009/VNM 3C-like protease (gene: POL)	43855	0.154785	0.567039	0	0	5.97015	11.1386	HSP90AB1
Norovirus Hu/Norwalk/20047/2009/VNM 3C-like protease (gene: POL)	43855	0.154785	0.56673	0	0	5.97015	11.1386	HSP90AB1
Norovirus Hu/Norwalk/20066/2009/VNM 3C-like protease (gene: POL)	43855	0.154785	0.566421	0	0	5.97015	11.1386	HSP90AB1
Norovirus Hu/Norwalk/20067/2009/VNM 3C-like protease (gene: POL)	43855	0.154785	0.566112	0	0	5.97015	11.1386	HSP90AB1
Norovirus Hu/Norwalk/20069/2009/VNM 3C-like protease (gene: POL)	43855	0.154785	0.565804	0	0	5.97015	11.1386	HSP90AB1
Norovirus Hu/Norwalk/20092/2009/VNM 3C-like protease (gene: POL)	43855	0.154785	0.565496	0	0	5.97015	11.1386	HSP90AB1
Norovirus Hu/Norwalk/20093/2009/VNM 3C-like protease (gene: POL)	43855	0.154785	0.565189	0	0	5.97015	11.1386	HSP90AB1
Norovirus Hu/Norwalk/20094/2009/VNM 3C-like protease (gene: POL)	43855	0.154785	0.564882	0	0	5.97015	11.1386	HSP90AB1
Norovirus Hu/Norwalk/20118/2009/VNM 3C-like protease (gene: POL)	43855	0.154785	0.564575	0	0	5.97015	11.1386	HSP90AB1
Norovirus Hu/Norwalk/20122/2009/VNM 3C-like protease (gene: POL)	43855	0.154785	0.564268	0	0	5.97015	11.1386	HSP90AB1
Norovirus Hu/Norwalk/20123/2009/VNM 3C-like protease (gene: POL)	43855	0.154785	0.563962	0	0	5.97015	11.1386	HSP90AB1
Norovirus Hu/Norwalk/20128/2009/VNM 3C-like protease (gene: POL)	43855	0.154785	0.563656	0	0	5.97015	11.1386	HSP90AB1
Norovirus Hu/Norwalk/20135/2009/VNM 3C-like protease (gene: POL)	43855	0.154785	0.563351	0	0	5.97015	11.1386	HSP90AB1
Norovirus Hu/Norwalk/20139/2009/VNM 3C-like protease (gene: POL)	43855	0.154785	0.563046	0	0	5.97015	11.1386	HSP90AB1
Norovirus Hu/Norwalk/20140/2009/VNM 3C-like protease (gene: POL)	43855	0.154785	0.562741	0	0	5.97015	11.1386	HSP90AB1
Norovirus Hu/Norwalk/20142/2009/VNM 3C-like protease (gene: POL)	43855	0.154785	0.562436	0	0	5.97015	11.1386	HSP90AB1
Rhinovirus B69 2C	43855	0.154785	0.562132	0	0	5.97015	11.1386	GAPDH
Sudan ebolavirus - Nakisamata major nucleoprotein (gene: NP)	43855	0.154785	0.561828	0	0	5.97015	11.1386	RPL7A
Human betaherpesvirus 5 membrane glycoprotein US2 (gene: US2)	43855	0.154785	0.561525	0	0	5.97015	11.1386	B2M
Vaccinia virus TNF-alpha-receptor-like protein (gene: C22L)	43855	0.154785	0.561222	0	0	5.97015	11.1386	B2M
Human betaherpesvirus 5 uracil-DNA glycosylase (gene: UL114)	43855	0.154785	0.560919	0	0	5.97015	11.1386	RPS2
Human betaherpesvirus 7 envelope protein UL78 (gene: U51)	43855	0.154785	0.560616	0	0	5.97015	11.1386	UBC
Human cosavirus E VP1	43855	0.154785	0.560314	0	0	5.97015	11.1386	B2M
Human mastadenovirus A protease	43855	0.154785	0.560012	0	0	5.97015	11.1386	UBC
Human papillomavirus 143 transforming protein (gene: E7)	43855	0.154785	0.559711	0	0	5.97015	11.1386	UBC
Human papillomavirus 15 early protein (gene: E1)	43855	0.154785	0.559409	0	0	5.97015	11.1386	UBC
Human papillomavirus type 137 transforming protein (gene: E7)	43855	0.154785	0.559108	0	0	5.97015	11.1386	UBC
Human papillomavirus type 72b E1 protein (gene: E1)	43855	0.154785	0.558808	0	0	5.97015	11.1386	UBC
Human papillomavirus type 92 E7	43855	0.154785	0.558507	0	0	5.97015	11.1386	UBC
Human parechovirus 1 VP0	43855	0.154785	0.558208	0	0	5.97015	11.1386	B2M
Human rhinovirus A33 2C	43855	0.154785	0.557908	0	0	5.97015	11.1386	UBC
Human rhinovirus A46 2C (P2-C)	43855	0.154785	0.557609	0	0	5.97015	11.1386	UBC
Monkeypox virus ser/thr protein kinase-like protein	2/105	0.156393	0.563098	0	0	2.84293	5.27472	HSPA8;UBC
Human papillomavirus 117 E2	2/105	0.156393	0.562796	0	0	2.84293	5.27472	HSP90AB1;B2M
Human papillomavirus 94 E2 protein (gene: E2)	2/105	0.156393	0.562495	0	0	2.84293	5.27472	PABPC1;B2M
Human papillomavirus type 27b E2 protein (gene: E2)	2/105	0.156393	0.562194	0	0	2.84293	5.27472	PABPC1;B2M
Yaba-like disease virus 140R protein (gene: 140R)	3/205	0.158845	0.570703	0	0	2.1842	4.01855	HSPA8;UBC;B2M
Human adenovirus D37 48.9 kDa (gene: E3)	3/206	0.160454	0.576174	0	0	2.1736	3.97714	C3;UBC;B2M
Human rhinovirus B52 3D	43856	0.160455	0.575872	0	0	5.74053	10.5037	UBC
Human rhinovirus B6 2C (P2-C)	43856	0.160455	0.575564	0	0	5.74053	10.5037	UBC
Molluscum contagiosum virus subtype 1 MC160L (gene: MC160L)	43856	0.160455	0.575257	0	0	5.74053	10.5037	UBC
Hantaan virus hypothetical protein	43856	0.160455	0.57495	0	0	5.74053	10.5037	B2M
Hantavirus Z10 G1/G2 glycoprotein	43856	0.160455	0.574644	0	0	5.74053	10.5037	B2M
Norovirus Hu/GII.4/NIHIC17.1/2012/USA 3C-like protease (gene: POL)	43856	0.160455	0.574337	0	0	5.74053	10.5037	HSP90AB1
Norovirus Hu/GII.4/NIHIC17.5/2012/USA 3C-like protease (gene: POL)	43856	0.160455	0.574031	0	0	5.74053	10.5037	HSP90AB1
Norovirus Hu/GII.4/NIHIC17.6/2012/USA 3C-like protease (gene: POL)	43856	0.160455	0.573726	0	0	5.74053	10.5037	HSP90AB1
Norovirus Hu/GII.4/NIHIC35/2013/USA 3C-like protease (gene: POL)	43856	0.160455	0.57342	0	0	5.74053	10.5037	HSP90AB1
Human T-lymphotropic virus 4 group specific antigen (gene: gag)	43856	0.160455	0.573115	0	0	5.74053	10.5037	UBC
Human adenovirus 23 DNA binding protein (gene: E2A)	43856	0.160455	0.572811	0	0	5.74053	10.5037	UBC
Human adenovirus 3+7 DNA binding protein (gene: E2A)	43856	0.160455	0.572506	0	0	5.74053	10.5037	UBC
Human adenovirus 46 DBP	43856	0.160455	0.572202	0	0	5.74053	10.5037	UBC
Human adenovirus 6 17 kDa protein	43856	0.160455	0.571898	0	0	5.74053	10.5037	HSP90AB1
Human adenovirus B3 E2A DNA binding protein DBP (gene: E2A)	43856	0.160455	0.571595	0	0	5.74053	10.5037	UBC
Sin Nombre virus glycoprotein precursor (gene: GPC)	43856	0.160455	0.571292	0	0	5.74053	10.5037	B2M
Human cosavirus B VP3	43856	0.160455	0.570989	0	0	5.74053	10.5037	B2M
Human cosavirus B VP1	43856	0.160455	0.570687	0	0	5.74053	10.5037	B2M
Variola virus hypothetical protein (gene: D3L)	43856	0.160455	0.570385	0	0	5.74053	10.5037	B2M
Human enterovirus 94 VP1	43856	0.160455	0.570083	0	0	5.74053	10.5037	UBC
Human papillomavirus 132 E1 (gene: E1)	43856	0.160455	0.569781	0	0	5.74053	10.5037	UBC
Human papillomavirus 134 E1 (gene: E1)	43856	0.160455	0.56948	0	0	5.74053	10.5037	UBC
Human papillomavirus 135 transforming protein (gene: E7)	43856	0.160455	0.569179	0	0	5.74053	10.5037	UBC
Human papillomavirus 65 replication protein (gene: E1)	43856	0.160455	0.568879	0	0	5.74053	10.5037	UBC
Human papillomavirus type 115 early protein E1 (gene: E1)	43856	0.160455	0.568579	0	0	5.74053	10.5037	UBC
Human papillomavirus type 150 putative E1 product (gene: E1)	43856	0.160455	0.568279	0	0	5.74053	10.5037	B2M
Human papillomavirus type 39 E7 (gene: E7)	43856	0.160455	0.567979	0	0	5.74053	10.5037	UBC
Human papillomavirus type 54 transforming protein (gene: E7)	43856	0.160455	0.56768	0	0	5.74053	10.5037	UBC
Human rhinovirus A21 2C	43856	0.160455	0.567381	0	0	5.74053	10.5037	UBC
Human rhinovirus A23 1B (VP2)	43856	0.160455	0.567082	0	0	5.74053	10.5037	B2M
Human rhinovirus A23 1D (VP1)	43856	0.160455	0.566784	0	0	5.74053	10.5037	UBC
Human rhinovirus A34 2C	43856	0.160455	0.566486	0	0	5.74053	10.5037	UBC
Human rhinovirus B3 3D (polymerase)	43856	0.160455	0.566188	0	0	5.74053	10.5037	UBC
Human adenovirus 19 CR1-beta (gene: E3)	3/207	0.162067	0.571577	0	0	2.1631	3.93628	EEF1A1;UBC;B2M
Cowpox virus CPXV212 protein (gene: CPXV212 CDS)	2/108	0.163449	0.576146	0	0	2.76396	5.00624	UBC;B2M
Cercopithecine betaherpesvirus 5 regulatory protein IE1 (gene: UL123)	43857	0.166087	0.58514	0	0	5.52792	9.92394	HSPA8
Lassa mammarenavirus Z protein	43857	0.166087	0.584833	0	0	5.52792	9.92394	B2M
Molluscum contagiosum virus subtype 1 MC079R (gene: MC079R)	43857	0.166087	0.584527	0	0	5.52792	9.92394	UBC
Monkeypox virus palmytilated EEV membrane protein	43857	0.166087	0.584221	0	0	5.52792	9.92394	B2M
Echovirus E3 2C	43857	0.166087	0.583915	0	0	5.52792	9.92394	UBC
HBV genotype B polymerase (gene: P)	43857	0.166087	0.583609	0	0	5.52792	9.92394	UBC
Norovirus Hu/GII.4/NIHIC11.3/2013/USA 3C-like protease (gene: POL)	43857	0.166087	0.583304	0	0	5.52792	9.92394	HSP90AB1
Human TMEV-like cardiovirus capsid protein VP1	43857	0.166087	0.582999	0	0	5.52792	9.92394	B2M
Human adenovirus 58 DNA binding protein (gene: E2A)	43857	0.166087	0.582694	0	0	5.52792	9.92394	UBC
Rhinovirus C 3D	43857	0.166087	0.58239	0	0	5.52792	9.92394	UBC
Human adenovirus D8 7.3kDa protein (gene: E4)	43857	0.166087	0.582086	0	0	5.52792	9.92394	UBC
Human betaherpesvirus 6B G-protein coupled receptor (gene: U51)	43857	0.166087	0.581783	0	0	5.52792	9.92394	UBC
Yaba monkey tumor virus G protein-coupled chemokine receptor-like protein	43857	0.166087	0.581479	0	0	5.52792	9.92394	UBC
Human papillomavirus 121 transforming protein E7 (gene: E7)	43857	0.166087	0.581176	0	0	5.52792	9.92394	UBC
Human papillomavirus 133 E7 (gene: E7)	43857	0.166087	0.580874	0	0	5.52792	9.92394	UBC
Human papillomavirus 146 replication protein (gene: E1)	43857	0.166087	0.580571	0	0	5.52792	9.92394	UBC
Human papillomavirus type 112 E1 protein (gene: E1)	43857	0.166087	0.580269	0	0	5.52792	9.92394	UBC
Human polyomavirus 12 large T antigen	43857	0.166087	0.579967	0	0	5.52792	9.92394	HSP90AB1
Human rhinovirus A49 1D	43857	0.166087	0.579666	0	0	5.52792	9.92394	UBC
Human rhinovirus A75 1D (VP1)	43857	0.166087	0.579365	0	0	5.52792	9.92394	UBC
Sagiyama virus full_polyprotein 1..1253 (gene: C-E3-E2-6K-E1)	2/110	0.168184	0.586374	0	0	2.7137	4.83771	PABPC1;B2M
Monkeypox virus Zaire-96-I-16 B1R (gene: B1R)	2/111	0.170561	0.594352	0	0	2.68926	4.75639	UBC;B2M
Cowpox virus CrmC or CPXV191 protein (gene: CrmC)	43858	0.171682	0.597949	0	0	5.33049	9.39291	B2M
Machupo mammarenavirus Z protein	43858	0.171682	0.597639	0	0	5.33049	9.39291	B2M
Monkeypox virus CD47-like putative membrane protein	43858	0.171682	0.59733	0	0	5.33049	9.39291	B2M
Monkeypox virus Zaire-96-I-16 palmytilated EEV membrane glycoprotein (gene: C19L)	43858	0.171682	0.59702	0	0	5.33049	9.39291	B2M
Monkeypox virus Zaire-96-I-16 A40L (gene: A40L)	43858	0.171682	0.596711	0	0	5.33049	9.39291	B2M
Encephalomyocarditis virus protein 2C	43858	0.171682	0.596403	0	0	5.33049	9.39291	UBC
Encephalomyocarditis virus protein 1D	43858	0.171682	0.596094	0	0	5.33049	9.39291	B2M
Hepacivirus C E2 protein	43858	0.171682	0.595786	0	0	5.33049	9.39291	B2M
Norovirus Hu/GII.2/HS255/2011/USA 3C-like protease (gene: POL)	43858	0.171682	0.595478	0	0	5.33049	9.39291	HSP90AB1
Human adenovirus 21 DNA-binding protein (gene: E2A)	43858	0.171682	0.595171	0	0	5.33049	9.39291	UBC
Human adenovirus 22 DNA binding protein (gene: E2A)	43858	0.171682	0.594864	0	0	5.33049	9.39291	UBC
Human adenovirus 43 DNA binding protein (gene: E2A)	43858	0.171682	0.594557	0	0	5.33049	9.39291	UBC
Human adenovirus 50 DNA binding protein (gene: E2A)	43858	0.171682	0.594251	0	0	5.33049	9.39291	UBC
Human adenovirus 54 DNA binding protein	43858	0.171682	0.593944	0	0	5.33049	9.39291	UBC
Human adenovirus 63 18.4K protein (gene: E3)	43858	0.171682	0.593639	0	0	5.33049	9.39291	B2M
Pichinde mammarenavirus N protein	43858	0.171682	0.593333	0	0	5.33049	9.39291	UBC
Human adenovirus 71 ssDNA-binding protein (gene: E2A)	43858	0.171682	0.593028	0	0	5.33049	9.39291	UBC
Human adenovirus D8 DNA binding protein (gene: E2A)	43858	0.171682	0.592723	0	0	5.33049	9.39291	UBC
Human alphaherpesvirus 2 tegument host shutoff protein (gene: UL41)	43858	0.171682	0.592418	0	0	5.33049	9.39291	HSPA8
Human betaherpesvirus 6 U51, GCR (gene: U51)	43858	0.171682	0.592114	0	0	5.33049	9.39291	UBC
Human betaherpesvirus 6A envelope protein UL78 (gene: U51)	43858	0.171682	0.59181	0	0	5.33049	9.39291	UBC
Human betaherpesvirus 6B glycoprotein (gene: U20)	43858	0.171682	0.591506	0	0	5.33049	9.39291	B2M
Human cosavirus E 3D	43858	0.171682	0.591203	0	0	5.33049	9.39291	UBC
Human enterovirus C118 2C	43858	0.171682	0.5909	0	0	5.33049	9.39291	UBC
Human gammaherpesvirus 8 K13	43858	0.171682	0.590597	0	0	5.33049	9.39291	UBC
Human gammaherpesvirus 8 ORF75	43858	0.171682	0.590295	0	0	5.33049	9.39291	PABPC1
Human papillomavirus 100 E1 protein (gene: E1)	43858	0.171682	0.589993	0	0	5.33049	9.39291	UBC
Human papillomavirus 110 E7 protein (gene: E7)	43858	0.171682	0.589691	0	0	5.33049	9.39291	UBC
Human papillomavirus 141 replication protein (gene: E1)	43858	0.171682	0.58939	0	0	5.33049	9.39291	UBC
Human papillomavirus 151 putative E7 product (gene: E7)	43858	0.171682	0.589088	0	0	5.33049	9.39291	UBC
Human papillomavirus type 50 transforming protein E7 (gene: E7)	43858	0.171682	0.588788	0	0	5.33049	9.39291	UBC
Human papillomavirus type 7 early protein (gene: E1)	43858	0.171682	0.588487	0	0	5.33049	9.39291	UBC
Human parechovirus 8 VP0	43858	0.171682	0.588187	0	0	5.33049	9.39291	B2M
Human poliovirus 3 P2-X	43858	0.171682	0.587887	0	0	5.33049	9.39291	UBC
Human rhinovirus A30 1B	43858	0.171682	0.587587	0	0	5.33049	9.39291	B2M
Human rhinovirus A60 2C	43858	0.171682	0.587288	0	0	5.33049	9.39291	UBC
Horsepox virus HSPV162	3/214	0.173498	0.593198	0	0	2.09234	3.66492	HSP90AB1;UBC;B2M
Monkeypox virus kelch-like protein	3/215	0.17515	0.59854	0	0	2.08261	3.62814	HSPA8;UBC;B2M
Chandipura virus phosphoprotein	43859	0.17724	0.605374	0	0	5.14668	8.90505	UBC
Cowpox virus CPXV061 protein (gene: CPXV061 CDS)	43859	0.17724	0.605066	0	0	5.14668	8.90505	B2M
Monkeypox virus secreted epidermal growth factor-like protein	43859	0.17724	0.604758	0	0	5.14668	8.90505	UBC
Monkeypox virus Zaire-96-I-16 epidermal growth factor-like protein (EGF-like protein) (gene: D3R)	43859	0.17724	0.604451	0	0	5.14668	8.90505	UBC
Norovirus GIV Pro	43859	0.17724	0.604145	0	0	5.14668	8.90505	HSP90AB1
Human adenovirus 22 17.6 kDa protein (gene: E3)	43859	0.17724	0.603838	0	0	5.14668	8.90505	B2M
Human adenovirus 23 orf 1 protein (gene: E4)	43859	0.17724	0.603532	0	0	5.14668	8.90505	B2M
Human adenovirus 49 DNA Binding Protein	43859	0.17724	0.603226	0	0	5.14668	8.90505	UBC
Powassan virus anchored core protein C	43859	0.17724	0.60292	0	0	5.14668	8.90505	RPL13
Human adenovirus D8 17.7kDa protein (gene: E3)	43859	0.17724	0.602615	0	0	5.14668	8.90505	B2M
SARS coronavirus nucleocapsid protein (gene: N)	43859	0.17724	0.60231	0	0	5.14668	8.90505	B2M
Human adenovirus E4 DNA polymerase	43859	0.17724	0.602005	0	0	5.14668	8.90505	HSP90AB1
SARS coronavirus P2 nucleocapsid protein	43859	0.17724	0.601701	0	0	5.14668	8.90505	B2M
SARS coronavirus Tor2 nucleocapsid protein	43859	0.17724	0.601397	0	0	5.14668	8.90505	B2M
Human betacoronavirus 2c Jordan-N3/2012 S protein (gene: S)	43859	0.17724	0.601093	0	0	5.14668	8.90505	B2M
Vaccinia virus soluble interferon-gamma receptor-like protein (gene: B8R)	43859	0.17724	0.60079	0	0	5.14668	8.90505	B2M
Human betaherpesvirus 7 uracil-DNA glycosylase (gene: U81)	43859	0.17724	0.600487	0	0	5.14668	8.90505	RPS2
Vaccinia virus Ankara secreted interferon gamma receptor	43859	0.17724	0.600184	0	0	5.14668	8.90505	B2M
Variola virus secreted complement-binding protein (gene: D12L)	43859	0.17724	0.599881	0	0	5.14668	8.90505	C3
Human gammaherpesvirus 4 hypothetical protein (gene: BHRF1)	43859	0.17724	0.599579	0	0	5.14668	8.90505	HSPA8
Human herpesvirus 4 type 2 BHRF1	43859	0.17724	0.599277	0	0	5.14668	8.90505	HSPA8
Human mastadenovirus E DNA polymerase (gene: E2B)	43859	0.17724	0.598976	0	0	5.14668	8.90505	HSP90AB1
Human papillomavirus 121 replication protein E1 (gene: E1)	43859	0.17724	0.598674	0	0	5.14668	8.90505	B2M
Human papillomavirus 154 E7	43859	0.17724	0.598373	0	0	5.14668	8.90505	UBC
Human papillomavirus type 128 E7 (gene: E7)	43859	0.17724	0.598073	0	0	5.14668	8.90505	UBC
Human papillomavirus type 166 E1 (gene: E1)	43859	0.17724	0.597772	0	0	5.14668	8.90505	UBC
Human papillomavirus type 60 replication protein E1 (gene: E1)	43859	0.17724	0.597472	0	0	5.14668	8.90505	UBC
Human papillomavirus type 68 E7 (gene: E7)	43859	0.17724	0.597172	0	0	5.14668	8.90505	UBC
Human polyomavirus 9 small T antigen	43859	0.17724	0.596873	0	0	5.14668	8.90505	UBC
Human polyomavirus IPPyV small T antigen protein (gene: small T antigen)	43859	0.17724	0.596574	0	0	5.14668	8.90505	UBC
Human rhinovirus A40 1D	43859	0.17724	0.596275	0	0	5.14668	8.90505	UBC
Human rhinovirus A43 1D	43859	0.17724	0.595976	0	0	5.14668	8.90505	UBC
Human rhinovirus A71 3D	43859	0.17724	0.595678	0	0	5.14668	8.90505	UBC
Human rhinovirus A77 1D	43859	0.17724	0.59538	0	0	5.14668	8.90505	UBC
[truncated: 1,026 more rows]

## Sheet: Virus Perturbations from GEO up
Term	Overlap	P-value	Adjusted P-value	Old P-value	Old Adjusted P-value	Odds Ratio	Combined Score	Genes
RSV 4Hour GSE3397	17/300	1.82428e-11	5.89243e-09	0	0	8.45771	209.136	RPL4;GPX1;RPS7;RPS5;RPL12;RPL11;RPL36A;RPL8;EEF2;RPL6;RPS17;RPL36;RPS3;RPL13;FAU;B2M;RPL19
RSV 24Hour GSE3397	13/300	1.17256e-07	1.89368e-05	0	0	6.46766	103.217	RPL4;RPS7;RPL36A;RPL8;RPL6;RPL7A;RPS17;RPL36;RPL14;RPL13;RPL38;FAU;B2M
SARS-ddORF6 24Hour GSE47961	10/300	3.5179e-05	0.00378761	0	0	4.97512	51.0202	RPS4X;RPL7A;RPL3;RPL32;RPS18;RPS5;RPS6;RPLP0;RPLP2;RPL38
hMPV 12Hour GSE8961	10/300	3.5179e-05	0.0028407	0	0	4.97512	51.0202	EEF1A1;RPL3;RPL32;RPS18;RPL12;RPL11;RPL36A;RPS11;B2M;S100A8
A-Vietnam-1203-2004(H5N1) 7Hour GSE28166	9/300	0.000193448	0.0124967	0	0	4.47761	38.2858	UBB;RPS18;FTH1;ALB;RPL11;HP;RPS21;RPS24;RPS23
cSARS Bat SRBD 60Hour GSE37827	9/300	0.000193448	0.0104139	0	0	4.47761	38.2858	BST2;FGB;CD74;UBB;UBC;SAA1;SAA2;S100A9;CFB
SARS-BatSRBD 60Hour GSE47961	8/300	0.00095131	0.0438962	0	0	3.9801	27.6922	RPL5;GPX1;RPS18;RPL12;RPL37A;RPSA;RPL23A;TPT1
A-CA-04-2009(H1N1)MA Day1 GSE36328	7/300	0.00414059	0.167176	0	0	3.48259	19.1087	IFITM3;HPX;AMBP;FTH1;SAA1;S100A9;CFB
Dhori Virus 12Hour GSE17400	7/300	0.00414059	0.148601	0	0	3.48259	19.1087	RPL4;RPS4X;HSPA8;RPL7A;GPX1;CFB;RPL19
Ebolavirus(EBOV) 5day Splenocytes GSE17509	7/300	0.00414059	0.133741	0	0	3.48259	19.1087	RPS14;RPS7;RPS5;RPL38;GAPDH;RPS12;RPS23
HCV JFH-1 18Hour GSE20948	7/300	0.00414059	0.121583	0	0	3.48259	19.1087	IFITM3;RPS14;ORM1;AMBP;AHSG;RPL13A;TPT1
HCoV-EMC2012 0Hour GSE45042	7/300	0.00414059	0.111451	0	0	3.48259	19.1087	EEF1A1;HSPA8;AHSG;UBC;RPSA;RPS21;RPL19
SARS-CoV 12Hour GSE17400	7/300	0.00414059	0.102878	0	0	3.48259	19.1087	RPS4X;RPS9;RPL41;RPLP0;RPL36A;PTMA;GAPDH
SARS-CoV 24Hour GSE47961	7/300	0.00414059	0.0955293	0	0	3.48259	19.1087	RPL4;RPS17;RPS5;RPL12;RPLP2;RPS2;EEF2
hMPV 24Hour GSE8961	7/300	0.00414059	0.0891607	0	0	3.48259	19.1087	C3;RPL3;UBB;UBC;RPL11;B2M;RPL6
A-Vietnam-1203 CIP048 RG3-2004(H5N1)PB1-F2del 7day-MOI-10^3 GSE43302	6/300	0.0157522	0.317998	0	0	2.98507	12.3904	IFITM3;EEF1G;PABPC1;RPS2;CFB;RPS24
A-Vietnam-1203 CIP048 RG3-2004(H5N1)mutPB1-F2del 12Hour GSE43203	6/300	0.0157522	0.299292	0	0	2.98507	12.3904	RPS14;ALB;RPL37A;HP;RPS2;B2M
Dhori Virus 24Hour GSE17400	6/300	0.0157522	0.282665	0	0	2.98507	12.3904	CD74;RPL41;RPS29;S100A9;RPL17;RPS24
HIV-1 LAI 12Hour-UV treatment GSE56484	6/300	0.0157522	0.267788	0	0	2.98507	12.3904	RPL3;GPX1;UBB;FTH1;RPL13;ACTG1
SARS-BatSRBD 12Hour GSE47962	6/300	0.0157522	0.254399	0	0	2.98507	12.3904	RPS9;GPX1;RPL37A;RPLP2;RPL38;RPL19
SARS-BatSRBD 84Hour GSE47961	6/300	0.0157522	0.242284	0	0	2.98507	12.3904	IFITM3;EEF1A1;UBC;RPS2;HIST1H3B;CFB
A-Vietnam-1203-2004(H5N1) 12Hour GSE28166	5/300	0.0515842	0.757349	0	0	2.48756	7.37448	EEF1A1;FTH1;APOC1;RPL36A;RPS2
A-Vietnam-1203-2004(H5N1) 18Hour GSE28166	5/300	0.0515842	0.724421	0	0	2.48756	7.37448	EEF1A1;APOC1;RPL36A;HIST1H4H;RPS2
HCV JFH-1 12Hour GSE20948	5/300	0.0515842	0.694237	0	0	2.48756	7.37448	FGG;RPSA;GAPDH;CCNB1IP1;RPL7
HCV JFH-1 24Hour GSE20948	5/300	0.0515842	0.666467	0	0	2.48756	7.37448	RPS4X;RPL3;RPLP0;FGG;RPL13
RSV 48Hour GSE32138	5/300	0.0515842	0.640834	0	0	2.48756	7.37448	IFITM3;BST2;B2M;ACTB;ACTG1
SARS-CoV MA15 Day7-PFU-10^2 GSE33266	5/300	0.0515842	0.617099	0	0	2.48756	7.37448	EEF1A1;FGB;RPLP0;HIST1H3B;ACTB
SARS-CoV 48Hour GSE47961	5/300	0.0515842	0.59506	0	0	2.48756	7.37448	RPS18;RPS29;RPL17;TPT1;RPL7
SARS-ddORF6 84Hour GSE47961	5/300	0.0515842	0.574541	0	0	2.48756	7.37448	IFITM3;UBC;B2M;CFB;HSP90B1
A-CA-04-2009(H1N1) 12Hour GSE37571	4/300	0.142705	1	0	0	1.99005	3.87457	RPL12;APOC1;SAA2;RPS2
A-CA-04-2009(H1N1) 18hour GSE47962	4/300	0.142705	1	0	0	1.99005	3.87457	BST2;HIST1H3B;B2M;ACTG1
A-CA-04-2009(H1N1) 24Hour GSE40844	4/300	0.142705	1	0	0	1.99005	3.87457	BST2;RPS18;RPL12;RPL36A
A-CA-04-2009(H1N1) 48Hour GSE47961	4/300	0.142705	1	0	0	1.99005	3.87457	IFITM3;BST2;B2M;CFB
A-Netherlands-602-2009(H1N1) 18Hour GSE40844	4/300	0.142705	1	0	0	1.99005	3.87457	BST2;RPL12;RPL37A;RPS27A
A-VN-1203-2004(H5N1) Day7-10^2pfu GSE33263	4/300	0.142705	1	0	0	1.99005	3.87457	C3;HIST1H3B;HAMP;CCNB1IP1
A-Vietnam-1203-2004(H5N1) 24Hour GSE43204	4/300	0.142705	1	0	0	1.99005	3.87457	HP;RPSA;RPS2;RPL17
A CA 04 2009 7dayMOI-10^5 GSE37569	4/300	0.142705	1	0	0	1.99005	3.87457	LCN2;SAA1;RPSA;CFB
HCV JFH-1 48Hour GSE20948	4/300	0.142705	1	0	0	1.99005	3.87457	RPL3;UBC;FGG;RPS3
HCoV-EMC2012 24Hour GSE45042	4/300	0.142705	1	0	0	1.99005	3.87457	RPL3;RPLP1;RPS27A;RPL6
HHV8 72Hour-LEC GSE16354	4/300	0.142705	1	0	0	1.99005	3.87457	IFITM3;B2M;GAPDH;TPT1
RSV-A2 24Hour-B6.129PF1 J GSE18170	4/300	0.142705	1	0	0	1.99005	3.87457	IFITM3;HSPA8;HP;B2M
Rabies CVS-11 7day-Brain GSE30577	4/300	0.142705	1	0	0	1.99005	3.87457	IFITM3;RPS5;SAA1;B2M
SARS-BatSRBD 0Hour GSE47962	4/300	0.142705	1	0	0	1.99005	3.87457	RPL3;RPL14;RPL13A;RPL13
SARS-BatSRBD 96Hour GSE47962	4/300	0.142705	1	0	0	1.99005	3.87457	IFITM3;BST2;HIST1H4H;B2M
SARS-CoV MA15 Day1-PFU-10^5 GSE50000	4/300	0.142705	1	0	0	1.99005	3.87457	TTR;FTH1;APOA1;RPS12
SARS-CoV MA15 Day2-PFU-10^3 GSE33266	4/300	0.142705	1	0	0	1.99005	3.87457	HSPA8;RPL37A;APOE;PABPC1
SARS-CoV MA15 Day2-PFU-10^4 GSE33266	4/300	0.142705	0.980719	0	0	1.99005	3.87457	BST2;RPS29;RPS3;HAMP
SARS-CoV MA15 Day2-PFU-10^4 GSE50000	4/300	0.142705	0.960288	0	0	1.99005	3.87457	IFITM3;SAA1;APOA1;CFB
SARS-CoV MA15 Day4-C57BL-6 GSE40824	4/300	0.142705	0.94069	0	0	1.99005	3.87457	IFITM3;HPX;B2M;CFB
SARS-CoV MA15 Day7-C57BL6 GSE50878	4/300	0.142705	0.921876	0	0	1.99005	3.87457	FGB;SAA1;APOA1;CFB
SARS-CoV NSP16 Day7 GSE49263	4/300	0.142705	0.9038	0	0	1.99005	3.87457	C3;EEF1G;RPL14;CFB
SARS-CoV 84Hour GSE47961	4/300	0.142705	0.886419	0	0	1.99005	3.87457	IFITM3;UBC;RPS2;HSP90B1
SARS-CoV 96Hour GSE47961	4/300	0.142705	0.869695	0	0	1.99005	3.87457	IFITM3;BST2;UBC;B2M
SARS-dORF6 48Hour GSE47960	4/300	0.142705	0.853589	0	0	1.99005	3.87457	RPS8;RPL36A;RPL13;RPL17
cSARS Bat SRBD 12Hour GSE37827	4/300	0.142705	0.838069	0	0	1.99005	3.87457	UBC;RPLP0;RPL13A;RPS2
A-CA-04-2009(H1N1)MA Day3 GSE36328	3/300	0.326039	1	0	0	1.49254	1.67274	LCN2;SAA1;CFB
A-CA-04-2009(H1N1) 12Hour GSE40844	3/300	0.326039	1	0	0	1.49254	1.67274	BST2;RPL12;B2M
A-CA-04-2009(H1N1) 18Hour GSE37571	3/300	0.326039	1	0	0	1.49254	1.67274	BST2;SAA2;CFB
A-CA-04-2009(H1N1) 24Hour GSE47961	3/300	0.326039	1	0	0	1.49254	1.67274	IFITM3;BST2;ACTG1
A-CA-04-2009(H1N1) 36Hour GSE47962	3/300	0.326039	1	0	0	1.49254	1.67274	IFITM3;BST2;B2M
A-CA-04-2009(H1N1) 36Hour GSE37571	3/300	0.326039	1	0	0	1.49254	1.67274	BST2;FGG;S100A8
A-CA-04-2009(H1N1) 7Hour GSE37571	3/300	0.326039	1	0	0	1.49254	1.67274	BST2;ALB;B2M
A-CA-04-2009(H1N1) Day1 GSE36328	3/300	0.326039	1	0	0	1.49254	1.67274	RPS8;RPL13;RPS2
A-Netherlands-602-2009(H1N1) 36Hour GSE40844	3/300	0.326039	1	0	0	1.49254	1.67274	BST2;HP;B2M
A-Netherlands-602-2009(H1N1) 7Hour GSE40844	3/300	0.326039	1	0	0	1.49254	1.67274	FABP1;HPX;APOA1
A-VN-1203-2004(H5N1) Day2-10^2pfu GSE33263	3/300	0.326039	1	0	0	1.49254	1.67274	HSPA8;PSAP;HAMP
A-VN-1203-2004(H5N1) Day2-10^4pfu GSE33263	3/300	0.326039	1	0	0	1.49254	1.67274	C3;RPL13;HAMP
A-VN-1203-2004(H5N1) Day7-10^3pfu GSE33263	3/300	0.326039	1	0	0	1.49254	1.67274	C3;GC;HAMP
A-Vietnam-1203-2004(H5N1) 0Hour GSE28166	3/300	0.326039	1	0	0	1.49254	1.67274	EEF1A1;RPS8;TPT1
A-Vietnam-1203-2004(H5N1) 24Hour GSE28166	3/300	0.326039	1	0	0	1.49254	1.67274	HP;RPL36A;B2M
A-Vietnam-1203-2004(H5N1) 7Hour GSE43204	3/300	0.326039	1	0	0	1.49254	1.67274	ALB;RPS2;PTMA
A-Vietnam-1203 CIP048 RG3-2004(H5N1)PB1-F2del 1day-MOI-10^4 GSE44441	3/300	0.326039	1	0	0	1.49254	1.67274	IFITM3;HSPA8;AMBP
A-Vietnam-1203 CIP048 RG3-2004(H5N1)PB1-F2del 2day-MOI-10^4 GSE44441	3/300	0.326039	1	0	0	1.49254	1.67274	IFITM3;C3;HSP90B1
A-Vietnam-1203 CIP048 RG3-2004(H5N1)PB1-F2del 4day-MOI-10^3 GSE43302	3/300	0.326039	1	0	0	1.49254	1.67274	IFITM3;UBC;CFB
A-Vietnam-1203 CIP048 RG3-2004(H5N1) 7Hour GSE43203	3/300	0.326039	1	0	0	1.49254	1.67274	RPL13A;RPL23A;RPS2
A-Vietnam-1203 CIP048 RG3-2004(H5N1)mutPB1-F2del 18Hour GSE43203	3/300	0.326039	1	0	0	1.49254	1.67274	RPS18;APOC1;B2M
A-Vietnam-1203 CIP048 RG3-2004(H5N1)mutPB1-F2del 24Hour GSE43203	3/300	0.326039	1	0	0	1.49254	1.67274	ALB;HP;HAMP
A-Vietnam-1203 CIP048 RG3-2004(H5N1)mutPB2-627E 7Hour GSE43203	3/300	0.326039	1	0	0	1.49254	1.67274	RPL7A;FTH1;RPLP2
A-Vietnam-1203 CIP048 RG4-2004(H5N1)HAAvirmut 2day-MOI-10^4 GSE37572	3/300	0.326039	1	0	0	1.49254	1.67274	IFITM3;FGG;CFB
A-Vietnam-1203 CIP048 RG4-2004(H5N1)NS1trunc124 4day-MOI-10^3 GSE44445	3/300	0.326039	1	0	0	1.49254	1.67274	C3;HPX;CFB
A-Vietnam-1203 CIP048 RG4-2004(H5N1)PB2-627E 4day-MOI-10^4 GSE43301	3/300	0.326039	1	0	0	1.49254	1.67274	IFITM3;APOA2;B2M
A CA 04 2009 7dayMOI-10^3 GSE37569	3/300	0.326039	1	0	0	1.49254	1.67274	RPS18;RPLP0;APOA1
Dhori Virus 48Hour GSE17400	3/300	0.326039	1	0	0	1.49254	1.67274	IFITM3;LCN2;RPL17
Ebolavirus(EBOV) 1day Splenocytes GSE17509	3/300	0.326039	1	0	0	1.49254	1.67274	RPS14;RPS5;RPL38
HHV8 72Hour-BEC GSE16354	3/300	0.326039	1	0	0	1.49254	1.67274	C3;UBC;TPT1
Norwalk Virus HG23 GSE15520	3/300	0.326039	1	0	0	1.49254	1.67274	GPX1;FGG;CCNB1IP1
RSV-A2 24Hour-KO RSV GSE18170	3/300	0.326039	1	0	0	1.49254	1.67274	IFITM3;FTH1;CFB
SARS-BatSRBD 96Hour GSE47960	3/300	0.326039	1	0	0	1.49254	1.67274	IFITM3;B2M;CFB
SARS-CoV MA15 Day1-PFU-10^2 GSE33266	3/300	0.326039	1	0	0	1.49254	1.67274	LARS2;RPS9;RPLP0
SARS-CoV MA15 Day2-PFU-10^5 GSE33266	3/300	0.326039	1	0	0	1.49254	1.67274	RPS29;RPL37A;HAMP
SARS-CoV MA15 Day2 GSE49263	3/300	0.326039	1	0	0	1.49254	1.67274	IFITM3;SAA1;CFB
SARS-CoV MA15 Day4-PFU-10^5 GSE33266	3/300	0.326039	1	0	0	1.49254	1.67274	EEF1A1;C3;RPL13
SARS-CoV MA15 Day4-TNFRsf1b KO GSE40824	3/300	0.326039	1	0	0	1.49254	1.67274	HSP90AB1;SAA1;RPS12
SARS-CoV MA15 Day7 GSE49263	3/300	0.326039	1	0	0	1.49254	1.67274	EEF1G;B2M;CFB
SARS-CoV 0Hour GSE47960	3/300	0.326039	1	0	0	1.49254	1.67274	RPLP1;UBC;PTMA
SARS-CoV 12Hour GSE47962	3/300	0.326039	1	0	0	1.49254	1.67274	GPX1;RPL6;RPL19
SARS-CoV 24Hour GSE17400	3/300	0.326039	1	0	0	1.49254	1.67274	LCN2;S100A9;RPL17
SARS-dORF6 72Hour GSE47962	3/300	0.326039	1	0	0	1.49254	1.67274	UBB;UBC;CFB
SARS-dORF6 96Hour GSE47962	3/300	0.326039	1	0	0	1.49254	1.67274	IFITM3;HIST1H4H;B2M
SARS-ddORF6 60Hour GSE47961	3/300	0.326039	1	0	0	1.49254	1.67274	UBB;RPS18;RPL11
SARS-ddORF6 72Hour GSE47961	3/300	0.326039	1	0	0	1.49254	1.67274	IFITM3;BST2;UBC
cSARS Bat SRBD 24Hour GSE37827	3/300	0.326039	1	0	0	1.49254	1.67274	RPS6;RPL26;TPT1
cSARS Bat SRBD 72Hour GSE37827	3/300	0.326039	1	0	0	1.49254	1.67274	BST2;GC;S100A8
icSARS CoV 54Hour GSE33267	3/300	0.326039	1	0	0	1.49254	1.67274	BST2;GC;S100A8
icSARS CoV 60Hour GSE37827	3/300	0.326039	1	0	0	1.49254	1.67274	ORM1;UBB;SAA2
icSARS CoV 72Hour GSE37827	3/300	0.326039	0.993497	0	0	1.49254	1.67274	SAA2;GC;CFB
icSARS-Cov Day4 GSE50000	3/300	0.326039	0.984212	0	0	1.49254	1.67274	FGA;TTR;APOA1
A-CA-04-2009(H1N1) 0Hour GSE47961	2/300	0.599656	1	0	0	0.995025	0.508855	IFITM3;HSP90B1
A-CA-04-2009(H1N1) 12Hour GSE47960	2/300	0.599656	1	0	0	0.995025	0.508855	IFITM3;B2M
A-CA-04-2009(H1N1) 12Hour GSE47961	2/300	0.599656	1	0	0	0.995025	0.508855	IFITM3;BST2
A-CA-04-2009(H1N1) 24Hour GSE47960	2/300	0.599656	1	0	0	0.995025	0.508855	IFITM3;HSP90B1
A-CA-04-2009(H1N1) 24Hour GSE47962	2/300	0.599656	1	0	0	0.995025	0.508855	BST2;SAA1
A-CA-04-2009(H1N1) 24Hour GSE37571	2/300	0.599656	1	0	0	0.995025	0.508855	BST2;CFB
A-CA-04-2009(H1N1) 30Hour GSE37571	2/300	0.599656	1	0	0	0.995025	0.508855	BST2;CD74
A-CA-04-2009(H1N1) 36Hour GSE47960	2/300	0.599656	1	0	0	0.995025	0.508855	ACTB;CFB
A-CA-04-2009(H1N1) 3Hour GSE37571	2/300	0.599656	1	0	0	0.995025	0.508855	RPLP0;RPSA
A-CA-04-2009(H1N1) 6Hour GSE47961	2/300	0.599656	1	0	0	0.995025	0.508855	BST2;B2M
A-CA-04-2009(H1N1) 6Hour GSE47962	2/300	0.599656	1	0	0	0.995025	0.508855	BST2;CFB
A-VN-1203-2004(H5N1) Day1-10^3pfu GSE33263	2/300	0.599656	1	0	0	0.995025	0.508855	B2M;CCNB1IP1
A-VN-1203-2004(H5N1) Day1-10^4pfu GSE33263	2/300	0.599656	1	0	0	0.995025	0.508855	HPX;APOC1
A-VN-1203-2004(H5N1) Day2-10^3pfu GSE33263	2/300	0.599656	1	0	0	0.995025	0.508855	PSAP;HAMP
A-VN-1203-2004(H5N1) Day4-10^4pfu GSE33263	2/300	0.599656	1	0	0	0.995025	0.508855	RPL8;CCNB1IP1
A-Vietnam-1203-2004(H5N1) 2day-IDO1KO GSE40792	2/300	0.599656	1	0	0	0.995025	0.508855	IFITM3;B2M
A-Vietnam-1203-2004(H5N1) 3Hour GSE28166	2/300	0.599656	1	0	0	0.995025	0.508855	RPL36A;RPS21
A-Vietnam-1203 CIP048 RG3-2004(H5N1) 24Hour GSE43203	2/300	0.599656	1	0	0	0.995025	0.508855	ORM1;HP
A-Vietnam-1203 CIP048 RG3-2004(H5N1)mutPB2-627E 12Hour GSE43203	2/300	0.599656	1	0	0	0.995025	0.508855	FTH1;RPL14
A-Vietnam-1203 CIP048 RG3-2004(H5N1)mutPB2-627E 24Hour GSE43203	2/300	0.599656	1	0	0	0.995025	0.508855	HP;APOA1
A-Vietnam-1203 CIP048 RG3-2004(H5N1)mutPB2-627E 3Hour GSE43203	2/300	0.599656	1	0	0	0.995025	0.508855	RPS7;GC
A-Vietnam-1203 CIP048 RG4-2004(H5N1)HAAvirmut 4day-MOI-10^4 GSE37572	2/300	0.599656	1	0	0	0.995025	0.508855	IFITM3;CFB
A-Vietnam-1203 CIP048 RG4-2004(H5N1)NS1trunc124 1day-MOI-10^3 GSE44445	2/300	0.599656	1	0	0	0.995025	0.508855	TTR;APOA1
A-Vietnam-1203 CIP048 RG4-2004(H5N1)NS1trunc124 4day-MOI-10^4 GSE44445	2/300	0.599656	1	0	0	0.995025	0.508855	HPX;CFB
A-Vietnam-1203 CIP048 RG4-2004(H5N1)NS1trunc124 7day-MOI-10^4 GSE44445	2/300	0.599656	1	0	0	0.995025	0.508855	CFB;RPS24
A-Vietnam-1203 CIP048 RG4-2004(H5N1)NS1trunc 12Hour GSE43204	2/300	0.599656	1	0	0	0.995025	0.508855	RPL12;RPS2
A-Vietnam-1203 CIP048 RG4-2004(H5N1)NS1trunc 24Hour GSE43204	2/300	0.599656	1	0	0	0.995025	0.508855	B2M;CFB
A-Vietnam-1203 CIP048 RG4-2004(H5N1)NS1trunc 3Hour GSE43204	2/300	0.599656	1	0	0	0.995025	0.508855	RPL36A;RPS12
A-Vietnam-1203 CIP048 RG4-2004(H5N1)PB2-627E 1day-MOI-10^4 GSE43301	2/300	0.599656	1	0	0	0.995025	0.508855	FGA;RPS12
A CA 04 2009 4dayMOI-10^3 GSE37569	2/300	0.599656	1	0	0	0.995025	0.508855	IFITM3;APOA1
A CA 04 2009 4dayMOI-10^6 GSE37569	2/300	0.599656	1	0	0	0.995025	0.508855	RPS2;CFB
A CA 04 2009 7dayMOI-10^4 GSE37569	2/300	0.599656	1	0	0	0.995025	0.508855	SAA1;CFB
Ebolavirus(EBOV) 3day Splenocytes GSE17509	2/300	0.599656	1	0	0	0.995025	0.508855	RPS7;CFB
Ebolavirus(EBOV) 7day Splenocytes GSE17509	2/300	0.599656	1	0	0	0.995025	0.508855	GAPDH;RPS12
Enterovirus 71 8Hour GSE15323	2/300	0.599656	1	0	0	0.995025	0.508855	RPS6;RPL38
HCV JFH1 168Hour-Huh7 GSE29889	2/300	0.599656	1	0	0	0.995025	0.508855	RPS6;HAMP
HCoV-EMC2012 7Hour GSE45042	2/300	0.599656	1	0	0	0.995025	0.508855	RPS15;RPL13A
HHV-8 72Hour GSE6489	2/300	0.599656	1	0	0	0.995025	0.508855	EEF1G;LCN2
RV16 0Hour-B2B GSE28904	2/300	0.599656	1	0	0	0.995025	0.508855	BST2;RPL8
SARS-BatSRBD 0Hour GSE47960	2/300	0.599656	1	0	0	0.995025	0.508855	UBC;RPL13A
SARS-BatSRBD 36Hour GSE47960	2/300	0.599656	1	0	0	0.995025	0.508855	C3;ACTB
SARS-BatSRBD 48Hour GSE47960	2/300	0.599656	1	0	0	0.995025	0.508855	RPL17;TPT1
SARS-BatSRBD 60Hour GSE47960	2/300	0.599656	1	0	0	0.995025	0.508855	IFITM3;CFB
SARS-BatSRBD 72Hour GSE47961	2/300	0.599656	1	0	0	0.995025	0.508855	RPL26;RPS23
SARS-CoV MA15 Day1-PFU-10^3 GSE33266	2/300	0.599656	1	0	0	0.995025	0.508855	RPL8;ACTB
SARS-CoV MA15 Day1-PFU-10^4 GSE33266	2/300	0.599656	1	0	0	0.995025	0.508855	LARS2;RPS23
SARS-CoV MA15 Day1-PFU-10^5 GSE33266	2/300	0.599656	1	0	0	0.995025	0.508855	AHSG;SAA1
SARS-CoV MA15 Day2-C57BL6 GSE50878	2/300	0.599656	1	0	0	0.995025	0.508855	IFITM3;SAA1
SARS-CoV MA15 Day2-PFU-10^2 GSE33266	2/300	0.599656	1	0	0	0.995025	0.508855	HSPA8;RPS29
SARS-CoV MA15 Day2-PFU-10^5 GSE50000	2/300	0.599656	1	0	0	0.995025	0.508855	APOA1;HSP90B1
SARS-CoV MA15 Day4-PFU-10^4 GSE33266	2/300	0.599656	1	0	0	0.995025	0.508855	C3;FAU
SARS-CoV MA15 Day4-PFU-10^5 GSE50000	2/300	0.599656	1	0	0	0.995025	0.508855	APOA1;RPS2
SARS-CoV MA15 Day4 GSE49262	2/300	0.599656	1	0	0	0.995025	0.508855	HSP90AB1;CFB
SARS-CoV MA15 Day7-CXCR3KO GSE50878	2/300	0.599656	1	0	0	0.995025	0.508855	MYH9;CFB
SARS-CoV MA15 Day7-PFU-10^3 GSE33266	2/300	0.599656	1	0	0	0.995025	0.508855	FGB;ACTB
SARS-CoV MA15 Day7-PFU-10^4 GSE50000	2/300	0.599656	1	0	0	0.995025	0.508855	FGA;RPS6
SARS-CoV NSP16 Day4 GSE49263	2/300	0.599656	1	0	0	0.995025	0.508855	RPLP0;APOA2
SARS-CoV 48Hour GSE17400	2/300	0.599656	1	0	0	0.995025	0.508855	IFITM3;B2M
SARS-CoV 72Hour GSE47961	2/300	0.599656	1	0	0	0.995025	0.508855	IFITM3;BST2
SARS-dORF6 0Hour GSE47960	2/300	0.599656	1	0	0	0.995025	0.508855	RPL37A;RPL11
SARS-dORF6 12Hour GSE47960	2/300	0.599656	1	0	0	0.995025	0.508855	RPS8;RPL38
SARS-dORF6 60Hour GSE47960	2/300	0.599656	1	0	0	0.995025	0.508855	UBC;ORM2
SARS-dORF6 72Hour GSE47960	2/300	0.599656	1	0	0	0.995025	0.508855	IFITM3;UBC
SARS-dORF6 84Hour GSE47962	2/300	0.599656	1	0	0	0.995025	0.508855	IFITM3;RPL36A
SARS-ddORF6 0Hour GSE47961	2/300	0.599656	1	0	0	0.995025	0.508855	UBC;HSP90B1
SARS-ddORF6 48Hour GSE47961	2/300	0.599656	1	0	0	0.995025	0.508855	RPL26;RPL17
SARS-ddORF6 96Hour GSE47961	2/300	0.599656	1	0	0	0.995025	0.508855	UBB;HIST1H3B
cSARS Bat SRBD 36Hour GSE37827	2/300	0.599656	1	0	0	0.995025	0.508855	SAA2;S100A9
hMPV 48Hour GSE8961	2/300	0.599656	1	0	0	0.995025	0.508855	B2M;S100A8
hMPV 6Hour GSE8961	2/300	0.599656	1	0	0	0.995025	0.508855	FTH1;HSP90B1
hMPV 72Hour GSE8961	2/300	0.599656	1	0	0	0.995025	0.508855	LCN2;B2M
icSARA deltaORF6 3Hour GSE33267	2/300	0.599656	1	0	0	0.995025	0.508855	RPLP2;HSP90B1
icSARA deltaORF6 48Hour GSE33267	2/300	0.599656	1	0	0	0.995025	0.508855	RPL11;EEF2
icSARA deltaORF6 72Hour GSE33267	2/300	0.599656	1	0	0	0.995025	0.508855	BST2;EEF2
icSARS CoV 0Hour GSE33267	2/300	0.599656	1	0	0	0.995025	0.508855	RPLP1;UBC
icSARS CoV 24Hour GSE37827	2/300	0.599656	1	0	0	0.995025	0.508855	UBB;APOA1
icSARS CoV 30Hour GSE33267	2/300	0.599656	1	0	0	0.995025	0.508855	RPS6;ALB
icSARS CoV 36Hour GSE33267	2/300	0.599656	1	0	0	0.995025	0.508855	BST2;ALB
icSARS CoV 36Hour GSE37827	2/300	0.599656	1	0	0	0.995025	0.508855	HSPA8;RPS27A
icSARS CoV 48Hour GSE33267	2/300	0.599656	1	0	0	0.995025	0.508855	RPL11;GC
icSARS CoV 48Hour GSE37827	2/300	0.599656	1	0	0	0.995025	0.508855	HSPA8;UBC
icSARS CoV 60Hour GSE33267	2/300	0.599656	1	0	0	0.995025	0.508855	BST2;GC
icSARS CoV 72Hour GSE33267	2/300	0.599656	1	0	0	0.995025	0.508855	BST2;RPS6
icSARS CoV 7Hour GSE37827	2/300	0.599656	1	0	0	0.995025	0.508855	RPL7A;RPL13A
icSARS-Cov Day1 GSE50000	2/300	0.599656	1	0	0	0.995025	0.508855	FGA;FTH1
A-CA-04-2009(H1N1) 0Hour GSE47962	1/300	0.868931	1	0	0	0.497512	0.0698962	RPL3
A-CA-04-2009(H1N1) 0Hour GSE40844	1/300	0.868931	1	0	0	0.497512	0.0698962	RPL23A
A-CA-04-2009(H1N1) 18Hour GSE47960	1/300	0.868931	1	0	0	0.497512	0.0698962	IFITM3
A-CA-04-2009(H1N1) 36Hour GSE47961	1/300	0.868931	1	0	0	0.497512	0.0698962	HSP90B1
A-CA-04-2009(H1N1) 48Hour GSE47960	1/300	0.868931	1	0	0	0.497512	0.0698962	CFB
A-CA-04-2009(H1N1) 48Hour GSE47962	1/300	0.868931	1	0	0	0.497512	0.0698962	BST2
A-CA-04-2009(H1N1) 48Hour GSE37571	1/300	0.868931	1	0	0	0.497512	0.0698962	HSP90B1
A-CA-04-2009(H1N1) 48Hour GSE40844	1/300	0.868931	1	0	0	0.497512	0.0698962	BST2
A-CA-04-2009(H1N1) Day3 GSE36328	1/300	0.868931	1	0	0	0.497512	0.0698962	CFB
A-Netherlands-602-2009(H1N1) 0Hour GSE40844	1/300	0.868931	1	0	0	0.497512	0.0698962	AHSG
A-Netherlands-602-2009(H1N1) 12Hour GSE40844	1/300	0.868931	1	0	0	0.497512	0.0698962	BST2
A-Netherlands-602-2009(H1N1) 24Hour GSE40844	1/300	0.868931	1	0	0	0.497512	0.0698962	RPL12
A-Netherlands-602-2009(H1N1) 30Hour GSE40844	1/300	0.868931	1	0	0	0.497512	0.0698962	RPL26
A-Netherlands-602-2009(H1N1) 48Hour GSE40844	1/300	0.868931	1	0	0	0.497512	0.0698962	BST2
A-VN-1203-2004(H5N1) Day4-10^2pfu GSE33263	1/300	0.868931	1	0	0	0.497512	0.0698962	RPS29
A-Vietnam-1203-2004(H5N1) 2day-TNFRSF1BKO GSE40792	1/300	0.868931	1	0	0	0.497512	0.0698962	CFB
A-Vietnam-1203-2004(H5N1) 2day-wtC57BL-6J GSE40792	1/300	0.868931	1	0	0	0.497512	0.0698962	B2M
A-Vietnam-1203 CIP048 RG3-2004(H5N1)PB1-F2del 1day-MOI-10^3 GSE43302	1/300	0.868931	1	0	0	0.497512	0.0698962	RPL5
A-Vietnam-1203 CIP048 RG3-2004(H5N1)PB1-F2del 2day-MOI-10^3 GSE43302	1/300	0.868931	1	0	0	0.497512	0.0698962	LARS2
A-Vietnam-1203 CIP048 RG3-2004(H5N1)PB1-F2del 4day-MOI-10^4 GSE44441	1/300	0.868931	1	0	0	0.497512	0.0698962	IFITM3
A-Vietnam-1203 CIP048 RG3-2004(H5N1)mutPB1-F2del 0Hour GSE43203	1/300	0.868931	1	0	0	0.497512	0.0698962	RPLP2
A-Vietnam-1203 CIP048 RG3-2004(H5N1)mutPB1-F2del 7Hour GSE43203	1/300	0.868931	1	0	0	0.497512	0.0698962	RPS2
A-Vietnam-1203 CIP048 RG4-2004(H5N1)HAAvirmut 7day-MOI-10^4 GSE37572	1/300	0.868931	1	0	0	0.497512	0.0698962	EEF1G
A-Vietnam-1203 CIP048 RG4-2004(H5N1)NS1trunc124 1day-MOI-10^4 GSE44445	1/300	0.868931	1	0	0	0.497512	0.0698962	APOA1
A-Vietnam-1203 CIP048 RG4-2004(H5N1)NS1trunc124 7day-MOI-10^3 GSE44445	1/300	0.868931	1	0	0	0.497512	0.0698962	CFB
A-Vietnam-1203 CIP048 RG4-2004(H5N1)NS1trunc 18Hour GSE43204	1/300	0.868931	1	0	0	0.497512	0.0698962	BST2
A-Vietnam-1203 CIP048 RG4-2004(H5N1)NS1trunc 7Hour GSE43204	1/300	0.868931	1	0	0	0.497512	0.0698962	TPT1
A-Vietnam-1203 CIP048 RG4-2004(H5N1)PB2-627E 7day-MOI-10^4 GSE43301	1/300	0.868931	1	0	0	0.497512	0.0698962	IFITM3
A CA 04 2009 4dayMOI-10^4 GSE37569	1/300	0.868931	1	0	0	0.497512	0.0698962	IFITM3
A CA 04 2009 4dayMOI-10^5 GSE37569	1/300	0.868931	1	0	0	0.497512	0.0698962	HSP90AB1
A CA 04 2009 7dayMOI-10^6 GSE37569	1/300	0.868931	1	0	0	0.497512	0.0698962	CFB
Enterovirus 71 4Hour GSE15323	1/300	0.868931	1	0	0	0.497512	0.0698962	RPL38
HCV JFH1 96Hour-Huh7 5 1c2 GSE29889	1/300	0.868931	1	0	0	0.497512	0.0698962	UBC
HCV 8week-No IFN-a GSE37715	1/300	0.868931	1	0	0	0.497512	0.0698962	BST2
HCoV-EMC2012 3Hour GSE45042	1/300	0.868931	1	0	0	0.497512	0.0698962	RPS12
HEV 60Day GSE53731	1/300	0.868931	1	0	0	0.497512	0.0698962	RPL11
HIV Infected-mDC GSE42058	1/300	0.868931	1	0	0	0.497512	0.0698962	CD74
Rabies CVS-11 7day-Spinalcord GSE30577	1/300	0.868931	1	0	0	0.497512	0.0698962	B2M
SARS-BatSRBD 0Hour GSE47961	1/300	0.868931	1	0	0	0.497512	0.0698962	HIST1H4H
SARS-BatSRBD 24Hour GSE47960	1/300	0.868931	1	0	0	0.497512	0.0698962	LCN2
SARS-BatSRBD 48Hour GSE47961	1/300	0.868931	1	0	0	0.497512	0.0698962	IFITM3
SARS-BatSRBD 60Hour GSE47962	1/300	0.868931	1	0	0	0.497512	0.0698962	RPS23
SARS-BatSRBD 72Hour GSE47960	1/300	0.868931	1	0	0	0.497512	0.0698962	IFITM3
SARS-BatSRBD 72Hour GSE47962	1/300	0.868931	1	0	0	0.497512	0.0698962	IFITM3
SARS-BatSRBD 84Hour GSE47960	1/300	0.868931	1	0	0	0.497512	0.0698962	B2M
SARS-BatSRBD 84Hour GSE47962	1/300	0.868931	1	0	0	0.497512	0.0698962	RPL41
SARS-BatSRBD Day2 GSE50000	1/300	0.868931	1	0	0	0.497512	0.0698962	RPS23
SARS-BatSRBD Day4 GSE50000	1/300	0.868931	1	0	0	0.497512	0.0698962	RPS27A
SARS-BatSRBD Day7 GSE50000	1/300	0.868931	1	0	0	0.497512	0.0698962	RPS6
SARS-CoV MA15 Day1 GSE49262	1/300	0.868931	1	0	0	0.497512	0.0698962	MYH9
SARS-CoV MA15 Day4-PFU-10^2 GSE33266	1/300	0.868931	1	0	0	0.497512	0.0698962	RPL7A
SARS-CoV MA15 Day4-PFU-10^4 GSE50000	1/300	0.868931	1	0	0	0.497512	0.0698962	APOA1
SARS-CoV MA15 Day4 GSE49263	1/300	0.868931	1	0	0	0.497512	0.0698962	APOA2
SARS-CoV MA15 Day7-C57BL-6 GSE40824	1/300	0.868931	1	0	0	0.497512	0.0698962	GAPDH
SARS-CoV MA15 Day7-PFU-10^4 GSE33266	1/300	0.868931	1	0	0	0.497512	0.0698962	FGB
SARS-CoV MA15 Day7-PFU-10^5 GSE50000	1/300	0.868931	1	0	0	0.497512	0.0698962	GAPDH
SARS-CoV 48Hour GSE47960	1/300	0.868931	1	0	0	0.497512	0.0698962	UBC
SARS-CoV 60Hour GSE47960	1/300	0.868931	1	0	0	0.497512	0.0698962	IFITM3
SARS-CoV 60Hour GSE47962	1/300	0.868931	1	0	0	0.497512	0.0698962	ORM1
SARS-CoV 72Hour GSE47960	1/300	0.868931	1	0	0	0.497512	0.0698962	RPLP1
SARS-CoV 84Hour GSE47960	1/300	0.868931	1	0	0	0.497512	0.0698962	IFITM3
SARS-CoV 96Hour GSE47960	1/300	0.868931	1	0	0	0.497512	0.0698962	IFITM3
SARS-CoV 96Hour GSE47962	1/300	0.868931	1	0	0	0.497512	0.0698962	LARS2
SARS-dORF6 12Hour GSE47962	1/300	0.868931	1	0	0	0.497512	0.0698962	RPL19
SARS-dORF6 24Hour GSE47960	1/300	0.868931	1	0	0	0.497512	0.0698962	PABPC1
SARS-dORF6 60Hour GSE47962	1/300	0.868931	1	0	0	0.497512	0.0698962	RPSA
SARS-dORF6 84Hour GSE47960	1/300	0.868931	1	0	0	0.497512	0.0698962	IFITM3
SARS-dORF6 96Hour GSE47960	1/300	0.868931	1	0	0	0.497512	0.0698962	IFITM3
cSARS Bat SRBD 48Hour GSE37827	1/300	0.868931	1	0	0	0.497512	0.0698962	S100A9
cSARS Bat SRBD 54Hour GSE37827	1/300	0.868931	1	0	0	0.497512	0.0698962	BST2
icSARA deltaORF6 12Hour GSE33267	1/300	0.868931	1	0	0	0.497512	0.0698962	HSP90B1
icSARA deltaORF6 36Hour GSE33267	1/300	0.868931	1	0	0	0.497512	0.0698962	RPS6
icSARA deltaORF6 60Hour GSE33267	1/300	0.868931	1	0	0	0.497512	0.0698962	GC
icSARS CoV 12Hour GSE37827	1/300	0.868931	1	0	0	0.497512	0.0698962	RPS15
icSARS CoV 24Hour GSE33267	1/300	0.868931	1	0	0	0.497512	0.0698962	BST2
icSARS CoV 30Hour GSE37827	1/300	0.868931	1	0	0	0.497512	0.0698962	RPSA
icSARS CoV 54Hour GSE37827	1/300	0.868931	1	0	0	0.497512	0.0698962	BST2
icSARS CoV 7Hour GSE33267	1/300	0.868931	1	0	0	0.497512	0.0698962	RPS11
icSARS-Cov Day2 GSE50000	1/300	0.868931	1	0	0	0.497512	0.0698962	HSP90B1
icSARS-Cov Day7 GSE50000	1/300	0.868931	1	0	0	0.497512	0.0698962	RPS7

## Sheet: Virus Perturbations from GEO do
Term	Overlap	P-value	Adjusted P-value	Old P-value	Old Adjusted P-value	Odds Ratio	Combined Score	Genes
A-CA-04-2009(H1N1) 24Hour GSE47962	17/300	1.82428e-11	5.89243e-09	0	0	8.45771	209.136	RPL5;GPX1;RPS7;RPLP1;RPL13A;RPL6;RPL7;EEF1A1;RPL14;RPL13;RPL38;RPL26;PABPC1;RPS11;RPS27A;RPL17;TPT1
A-CA-04-2009(H1N1) 0Hour GSE47961	13/300	1.17256e-07	1.89368e-05	0	0	6.46766	103.217	RPL5;RPLP1;RPL11;RPL13A;RPL23A;RPL6;EEF1A1;RPS4X;RPS21;RPL17;RPS24;TPT1;RPL19
HHV8 72Hour-LEC GSE16354	13/300	1.17256e-07	1.26246e-05	0	0	6.46766	103.217	RPL3;RPL32;RPL12;RPL13A;RPL23A;RPL8;EEF1A1;RPL7A;RPS18;RPS3;PTMA;RPS23;RPL19
SARS-BatSRBD 96Hour GSE47960	11/300	5.7709e-06	0.000466	0	0	5.47264	66.0147	EEF1A1;UBB;RPS8;RPLP1;RPL12;UBC;RPL36A;RPL14;RPL26;RPS27A;RPL19
A-CA-04-2009(H1N1) 48Hour GSE47960	10/300	3.5179e-05	0.00227256	0	0	4.97512	51.0202	EEF1A1;HSPA8;RPLP1;RPL11;RPL38;RPL26;PABPC1;RPS27A;RPL17;TPT1
A-CA-04-2009(H1N1) 48Hour GSE37571	10/300	3.5179e-05	0.0018938	0	0	4.97512	51.0202	EEF1A1;RPL5;AMBP;RPLP0;RPSA;RPL23A;PABPC1;EEF2;TPT1;ACTG1
A-Vietnam-1203-2004(H5N1) 2day-wtC57BL-6J GSE40792	10/300	3.5179e-05	0.00162326	0	0	4.97512	51.0202	RPL7A;RPS29;RPL37A;RPS3;RPL38;RPS11;RPL17;TPT1;RPL7;RPL19
A-CA-04-2009(H1N1) 18hour GSE47962	9/300	0.000193448	0.00781044	0	0	4.47761	38.2858	RPS4X;RPS7;FTH1;RPL13;RPSA;RPL23A;EEF2;RPL6;RPS24
A-CA-04-2009(H1N1) 36Hour GSE47960	9/300	0.000193448	0.00694262	0	0	4.47761	38.2858	EEF1A1;RPS14;RPS17;RPL32;RPL37A;RPL26;RPL17;RPS24;RPL7
SARS-BatSRBD 84Hour GSE47960	9/300	0.000193448	0.00624835	0	0	4.47761	38.2858	RPL5;RPS17;RPL41;RPL11;RPL14;RPLP2;FAU;RPS24;TPT1
A-CA-04-2009(H1N1) 36Hour GSE37571	8/300	0.00095131	0.0279339	0	0	3.9801	27.6922	EEF1A1;EEF1G;RPS14;RPLP1;RPS3;HIST1H4H;RPSA;RPL23A
RSV-A2 24Hour-KO RSV GSE18170	8/300	0.00095131	0.0256061	0	0	3.9801	27.6922	RPL7A;RPL3;RPS7;RPL13A;APOE;RPL6;TPT1;RPL7
cSARS Bat SRBD 60Hour GSE37827	8/300	0.00095131	0.0236364	0	0	3.9801	27.6922	FABP1;RPL5;RPS14;RPLP0;RPSA;RPL23A;PABPC1;RPL6
A-Vietnam-1203 CIP048 RG4-2004(H5N1)HAAvirmut 4day-MOI-10^4 GSE37572	7/300	0.00414059	0.0955293	0	0	3.48259	19.1087	RPL4;EEF1A1;RPL5;RPS7;RPL11;RPS11;RPL17
Dhori Virus 24Hour GSE17400	7/300	0.00414059	0.0891607	0	0	3.48259	19.1087	AMBP;RPLP0;RPL37A;RPL13;RPL23A;ACTB;ACTG1
Norwalk Virus HG23 GSE15520	7/300	0.00414059	0.0835882	0	0	3.48259	19.1087	HPX;RPL7A;RPS9;AHSG;FTH1;RPS5;HP
SARS-CoV 60Hour GSE47960	7/300	0.00414059	0.0786712	0	0	3.48259	19.1087	EEF1A1;RPL5;RPS7;RPLP1;RPL11;RPL36A;RPL14
SARS-CoV 96Hour GSE47960	7/300	0.00414059	0.0743006	0	0	3.48259	19.1087	EEF1A1;HSPA8;HSP90AB1;UBB;RPLP1;RPL26;RPS27A
A-CA-04-2009(H1N1) 48Hour GSE47961	6/300	0.0157522	0.267788	0	0	2.98507	12.3904	HSPA8;RPS18;RPL17;RPL6;RPS24;TPT1
A-Vietnam-1203 CIP048 RG3-2004(H5N1)PB1-F2del 4day-MOI-10^3 GSE43302	6/300	0.0157522	0.254399	0	0	2.98507	12.3904	RPS14;RPL3;RPS7;RPS5;RPL13A;RPL7
Enterovirus 71 8Hour GSE15323	6/300	0.0157522	0.242284	0	0	2.98507	12.3904	RPL3;RPS29;FTH1;RPL13A;RPS11;RPL19
HHV8 72Hour-BEC GSE16354	6/300	0.0157522	0.231271	0	0	2.98507	12.3904	EEF1A1;RPL3;RPLP0;RPS2;ACTB;ACTG1
SARS-dORF6 96Hour GSE47960	6/300	0.0157522	0.221216	0	0	2.98507	12.3904	RPS14;RPS7;RPS29;RPL37A;RPL14;RPL26
icSARS CoV 54Hour GSE37827	6/300	0.0157522	0.211999	0	0	2.98507	12.3904	RPS4X;RPL5;RPLP0;RPL37A;RPL23A;RPS24
A-CA-04-2009(H1N1) 36Hour GSE47961	5/300	0.0515842	0.666467	0	0	2.48756	7.37448	EEF1G;RPL7A;RPLP1;RPSA;PABPC1
A-Vietnam-1203-2004(H5N1) 12Hour GSE28166	5/300	0.0515842	0.640834	0	0	2.48756	7.37448	HSP90AB1;UBC;MYH9;ACTB;ACTG1
A-Vietnam-1203-2004(H5N1) 3Hour GSE28166	5/300	0.0515842	0.617099	0	0	2.48756	7.37448	LARS2;RPLP2;MYH9;ACTB;RPL19
A-Vietnam-1203 CIP048 RG4-2004(H5N1)HAAvirmut 2day-MOI-10^4 GSE37572	5/300	0.0515842	0.59506	0	0	2.48756	7.37448	RPS7;APOE;RPL8;RPS11;RPL7
HCV JFH-1 18Hour GSE20948	5/300	0.0515842	0.574541	0	0	2.48756	7.37448	HPX;MYH9;RPL23A;ACTB;ACTG1
SARS-CoV NSP16 Day4 GSE49263	5/300	0.0515842	0.555389	0	0	2.48756	7.37448	RPL4;RPS14;RPS11;GC;RPL7
SARS-CoV NSP16 Day7 GSE49263	5/300	0.0515842	0.537474	0	0	2.48756	7.37448	RPL5;RPL3;RPS29;ALB;FAU
SARS-CoV 60Hour GSE47962	5/300	0.0515842	0.520678	0	0	2.48756	7.37448	RPS4X;RPL5;RPL14;RPL26;RPS23
SARS-dORF6 0Hour GSE47962	5/300	0.0515842	0.504899	0	0	2.48756	7.37448	RPS5;RPLP0;RPL37A;RPL13;RPSA
SARS-dORF6 24Hour GSE47962	5/300	0.0515842	0.490049	0	0	2.48756	7.37448	EEF1A1;RPLP1;RPL11;RPL23A;RPS23
SARS-dORF6 36Hour GSE47960	5/300	0.0515842	0.476048	0	0	2.48756	7.37448	GPX1;RPS7;FTH1;MYH9;ACTB
SARS-dORF6 72Hour GSE47962	5/300	0.0515842	0.462824	0	0	2.48756	7.37448	EEF1A1;RPS7;RPS6;RPL14;RPL26
SARS-ddORF6 0Hour GSE47961	5/300	0.0515842	0.450316	0	0	2.48756	7.37448	RPS4X;RPS17;RPL37A;RPL23A;FAU
SARS-ddORF6 84Hour GSE47961	5/300	0.0515842	0.438465	0	0	2.48756	7.37448	RPL32;FTH1;RPL14;RPS27A;ACTB
icSARA deltaORF6 12Hour GSE33267	5/300	0.0515842	0.427223	0	0	2.48756	7.37448	RPL4;HPX;RPL8;RPS12;RPS23
icSARS CoV 12Hour GSE33267	5/300	0.0515842	0.416542	0	0	2.48756	7.37448	RPL4;RPL8;EEF2;CCNB1IP1;RPS23
icSARS CoV 60Hour GSE37827	5/300	0.0515842	0.406382	0	0	2.48756	7.37448	RPLP0;RPL23A;RPL26;RPS11;RPS23
A-CA-04-2009(H1N1)MA Day1 GSE36328	4/300	0.142705	1	0	0	1.99005	3.87457	HSPA8;RPS7;RPS8;RPL8
A-CA-04-2009(H1N1) 24Hour GSE47960	4/300	0.142705	1	0	0	1.99005	3.87457	RPL4;EEF1A1;RPLP1;PABPC1
A-CA-04-2009(H1N1) 30Hour GSE37571	4/300	0.142705	1	0	0	1.99005	3.87457	EEF1A1;RPS14;RPL13;HIST1H3B
A-CA-04-2009(H1N1) 3Hour GSE37571	4/300	0.142705	1	0	0	1.99005	3.87457	HSPA8;RPL12;ACTG1;HSP90B1
A-Vietnam-1203 CIP048 RG4-2004(H5N1)PB2-627E 4day-MOI-10^4 GSE43301	4/300	0.142705	1	0	0	1.99005	3.87457	RPL5;RPS8;RPL38;RPL7
Dhori Virus 48Hour GSE17400	4/300	0.142705	0.980719	0	0	1.99005	3.87457	RPS4X;RPS2;GAPDH;ACTB
Ebolavirus(EBOV) 3day Splenocytes GSE17509	4/300	0.142705	0.960288	0	0	1.99005	3.87457	EEF1A1;FTH1;GC;RPS27A
Ebolavirus(EBOV) 7day Splenocytes GSE17509	4/300	0.142705	0.94069	0	0	1.99005	3.87457	EEF1A1;RPS29;RPLP0;RPS27A
HCV JFH-1 48Hour GSE20948	4/300	0.142705	0.921876	0	0	1.99005	3.87457	RPL4;HSPA8;APOA1;GAPDH
HCV JFH1 96Hour-Huh7 5 1c2 GSE29889	4/300	0.142705	0.9038	0	0	1.99005	3.87457	FABP1;LARS2;HSPA8;FTH1
SARS-BatSRBD 60Hour GSE47960	4/300	0.142705	0.886419	0	0	1.99005	3.87457	EEF1A1;RPL36A;RPS27A;RPL6
SARS-CoV MA15 Day1-PFU-10^2 GSE33266	4/300	0.142705	0.869695	0	0	1.99005	3.87457	RPLP1;RPL26;HIST1H3B;RPS21
SARS-CoV MA15 Day2-PFU-10^4 GSE33266	4/300	0.142705	0.853589	0	0	1.99005	3.87457	FTH1;RPLP2;RPS27A;PTMA
SARS-CoV MA15 Day2 GSE49263	4/300	0.142705	0.838069	0	0	1.99005	3.87457	RPL13A;FAU;RPS11;RPL17
SARS-CoV MA15 Day4-PFU-10^2 GSE33266	4/300	0.142705	0.823104	0	0	1.99005	3.87457	HSPA8;RPL3;RPLP1;PTMA
SARS-CoV 0Hour GSE47961	4/300	0.142705	0.808663	0	0	1.99005	3.87457	EEF1A1;RPL5;RPS29;RPS27A
SARS-CoV 0Hour GSE47962	4/300	0.142705	0.794721	0	0	1.99005	3.87457	RPL7A;RPLP0;RPS3;RPSA
SARS-CoV 84Hour GSE47961	4/300	0.142705	0.781251	0	0	1.99005	3.87457	RPS29;FTH1;RPS6;RPL14
icSARS CoV 36Hour GSE37827	4/300	0.142705	0.76823	0	0	1.99005	3.87457	RPS8;AHSG;RPL37A;APOC1
icSARS CoV 48Hour GSE37827	4/300	0.142705	0.755636	0	0	1.99005	3.87457	EEF1A1;RPL32;RPS6;RPL14
icSARS CoV 72Hour GSE37827	4/300	0.142705	0.743449	0	0	1.99005	3.87457	RPS17;RPL14;RPL23A;RPS27A
A-CA-04-2009(H1N1)MA Day3 GSE36328	3/300	0.326039	1	0	0	1.49254	1.67274	RPS7;ALB;RPL8
A-CA-04-2009(H1N1) 12Hour GSE47961	3/300	0.326039	1	0	0	1.49254	1.67274	HSP90AB1;PABPC1;HSP90B1
A-CA-04-2009(H1N1) 6Hour GSE47960	3/300	0.326039	1	0	0	1.49254	1.67274	RPL4;HSPA8;PABPC1
A-VN-1203-2004(H5N1) Day4-10^2pfu GSE33263	3/300	0.326039	1	0	0	1.49254	1.67274	RPLP1;RPL14;RPL26
A-Vietnam-1203-2004(H5N1) 24Hour GSE43204	3/300	0.326039	1	0	0	1.49254	1.67274	MYH9;CFB;HSP90B1
A-Vietnam-1203-2004(H5N1) 2day-IDO1KO GSE40792	3/300	0.326039	1	0	0	1.49254	1.67274	FABP1;FAU;RPL7
A-Vietnam-1203-2004(H5N1) 2day-TNFRSF1BKO GSE40792	3/300	0.326039	1	0	0	1.49254	1.67274	RPL4;RPS14;RPL17
A-Vietnam-1203-2004(H5N1) 7Hour GSE28166	3/300	0.326039	1	0	0	1.49254	1.67274	LARS2;HSPA8;MYH9
A-Vietnam-1203 CIP048 RG3-2004(H5N1) 7Hour GSE43203	3/300	0.326039	1	0	0	1.49254	1.67274	HSPA8;HSP90AB1;UBC
A-Vietnam-1203 CIP048 RG3-2004(H5N1)mutPB2-627E 0Hour GSE43203	3/300	0.326039	1	0	0	1.49254	1.67274	CD74;UBC;PSAP
A-Vietnam-1203 CIP048 RG3-2004(H5N1)mutPB2-627E 24Hour GSE43203	3/300	0.326039	1	0	0	1.49254	1.67274	C3;UBC;CFB
Dhori Virus 12Hour GSE17400	3/300	0.326039	1	0	0	1.49254	1.67274	RPL41;RPS8;B2M
Ebolavirus(EBOV) 5day Splenocytes GSE17509	3/300	0.326039	1	0	0	1.49254	1.67274	EEF1A1;RPLP0;RPS27A
Enterovirus 71 4Hour GSE15323	3/300	0.326039	1	0	0	1.49254	1.67274	HSPA8;HSP90AB1;B2M
HCV JFH-1 24Hour GSE20948	3/300	0.326039	1	0	0	1.49254	1.67274	GPX1;ACTB;RPS24
HCV JFH1 120Hour-Huh7 5 1 GSE29889	3/300	0.326039	1	0	0	1.49254	1.67274	AMBP;APOE;ORM2
HCV 8week-No IFN-a GSE37715	3/300	0.326039	1	0	0	1.49254	1.67274	EEF1G;RPS7;APOA1
HCoV-EMC2012 3Hour GSE45042	3/300	0.326039	1	0	0	1.49254	1.67274	RPS4X;PSAP;LCN2
SARS-BatSRBD 12Hour GSE47960	3/300	0.326039	1	0	0	1.49254	1.67274	C3;B2M;HSP90B1
SARS-BatSRBD 24Hour GSE47960	3/300	0.326039	1	0	0	1.49254	1.67274	EEF1A1;HPX;HSP90B1
SARS-BatSRBD 36Hour GSE47960	3/300	0.326039	1	0	0	1.49254	1.67274	RPS29;RPL37A;RPS11
SARS-BatSRBD 72Hour GSE47960	3/300	0.326039	1	0	0	1.49254	1.67274	HSPA8;HSP90AB1;RPS27A
SARS-BatSRBD 72Hour GSE47961	3/300	0.326039	1	0	0	1.49254	1.67274	RPSA;RPS11;RPS21
SARS-BatSRBD 72Hour GSE47962	3/300	0.326039	1	0	0	1.49254	1.67274	EEF1A1;HSPA8;RPL14
SARS-BatSRBD Day2 GSE50000	3/300	0.326039	1	0	0	1.49254	1.67274	FGB;RPL5;RPS5
SARS-CoV MA15 Day1-PFU-10^3 GSE33266	3/300	0.326039	1	0	0	1.49254	1.67274	C3;RPLP1;RPL14
SARS-CoV MA15 Day2-PFU-10^5 GSE33266	3/300	0.326039	1	0	0	1.49254	1.67274	RPS27A;PTMA;RPL17
SARS-CoV MA15 Day4-PFU-10^3 GSE33266	3/300	0.326039	1	0	0	1.49254	1.67274	FTH1;RPS5;RPLP2
SARS-CoV MA15 Day7-PFU-10^4 GSE50000	3/300	0.326039	1	0	0	1.49254	1.67274	TTR;RPL11;APOA1
SARS-CoV 12Hour GSE17400	3/300	0.326039	1	0	0	1.49254	1.67274	FABP1;LCN2;RPL17
SARS-CoV 12Hour GSE47960	3/300	0.326039	1	0	0	1.49254	1.67274	RPL4;FTH1;CFB
SARS-CoV 60Hour GSE47961	3/300	0.326039	1	0	0	1.49254	1.67274	HSPA8;FTH1;RPLP2
SARS-ddORF6 24Hour GSE47961	3/300	0.326039	1	0	0	1.49254	1.67274	CFB;ACTG1;HSP90B1
cSARS Bat SRBD 0Hour GSE37827	3/300	0.326039	1	0	0	1.49254	1.67274	FGG;RPL38;RPL26
cSARS Bat SRBD 48Hour GSE37827	3/300	0.326039	1	0	0	1.49254	1.67274	HSPA8;RPLP0;RPS27A
icSARS CoV 0Hour GSE37827	3/300	0.326039	1	0	0	1.49254	1.67274	FTH1;RPS6;SAA2
A-CA-04-2009(H1N1) 18Hour GSE47960	2/300	0.599656	1	0	0	0.995025	0.508855	HSP90AB1;EEF2
A-CA-04-2009(H1N1) 36Hour GSE47962	2/300	0.599656	1	0	0	0.995025	0.508855	EEF1G;RPS8
A-CA-04-2009(H1N1) 48Hour GSE47962	2/300	0.599656	1	0	0	0.995025	0.508855	EEF1A1;RPL3
A-CA-04-2009(H1N1) 48Hour GSE40844	2/300	0.599656	1	0	0	0.995025	0.508855	RPL14;RPSA
A-Netherlands-602-2009(H1N1) 48Hour GSE40844	2/300	0.599656	1	0	0	0.995025	0.508855	RPL14;APOE
A-Netherlands-602-2009(H1N1) 7Hour GSE40844	2/300	0.599656	1	0	0	0.995025	0.508855	FGA;FGG
A-VN-1203-2004(H5N1) Day1-10^2pfu GSE33263	2/300	0.599656	1	0	0	0.995025	0.508855	FGG;RPS2
A-VN-1203-2004(H5N1) Day1-10^3pfu GSE33263	2/300	0.599656	1	0	0	0.995025	0.508855	FGG;RPL36A
A-Vietnam-1203-2004(H5N1) 0Hour GSE28166	2/300	0.599656	1	0	0	0.995025	0.508855	RPS3;RPLP2
A-Vietnam-1203-2004(H5N1) 18Hour GSE28166	2/300	0.599656	1	0	0	0.995025	0.508855	UBC;ACTG1
A-Vietnam-1203-2004(H5N1) 7Hour GSE43204	2/300	0.599656	1	0	0	0.995025	0.508855	HSPA8;MYH9
A-Vietnam-1203 CIP048 RG3-2004(H5N1)PB1-F2del 1day-MOI-10^4 GSE44441	2/300	0.599656	1	0	0	0.995025	0.508855	RPS7;RPL7
A-Vietnam-1203 CIP048 RG3-2004(H5N1) 24Hour GSE43203	2/300	0.599656	1	0	0	0.995025	0.508855	C3;UBC
A-Vietnam-1203 CIP048 RG3-2004(H5N1)mutPB1-F2del 7Hour GSE43203	2/300	0.599656	1	0	0	0.995025	0.508855	HSPA8;ACTB
A-Vietnam-1203 CIP048 RG3-2004(H5N1)mutPB2-627E 18Hour GSE43203	2/300	0.599656	1	0	0	0.995025	0.508855	HSP90AB1;GAPDH
A-Vietnam-1203 CIP048 RG3-2004(H5N1)mutPB2-627E 3Hour GSE43203	2/300	0.599656	1	0	0	0.995025	0.508855	RPL13;APOE
A-Vietnam-1203 CIP048 RG3-2004(H5N1)mutPB2-627E 7Hour GSE43203	2/300	0.599656	1	0	0	0.995025	0.508855	LARS2;HSP90AB1
A-Vietnam-1203 CIP048 RG4-2004(H5N1)NS1trunc124 1day-MOI-10^4 GSE44445	2/300	0.599656	1	0	0	0.995025	0.508855	RPS2;RPS11
A-Vietnam-1203 CIP048 RG4-2004(H5N1)NS1trunc124 2day-MOI-10^3 GSE44445	2/300	0.599656	1	0	0	0.995025	0.508855	RPLP2;RPL38
A-Vietnam-1203 CIP048 RG4-2004(H5N1)NS1trunc124 4day-MOI-10^3 GSE44445	2/300	0.599656	1	0	0	0.995025	0.508855	RPS2;RPL7
A-Vietnam-1203 CIP048 RG4-2004(H5N1)NS1trunc124 4day-MOI-10^4 GSE44445	2/300	0.599656	1	0	0	0.995025	0.508855	ALB;RPL38
A-Vietnam-1203 CIP048 RG4-2004(H5N1)NS1trunc124 7day-MOI-10^3 GSE44445	2/300	0.599656	1	0	0	0.995025	0.508855	RPL37A;RPL38
A-Vietnam-1203 CIP048 RG4-2004(H5N1)NS1trunc124 7day-MOI-10^4 GSE44445	2/300	0.599656	1	0	0	0.995025	0.508855	FABP1;RPL38
A-Vietnam-1203 CIP048 RG4-2004(H5N1)NS1trunc 24Hour GSE43204	2/300	0.599656	1	0	0	0.995025	0.508855	MYH9;GAPDH
A CA 04 2009 4dayMOI-10^3 GSE37569	2/300	0.599656	1	0	0	0.995025	0.508855	FGB;RPL8
A CA 04 2009 4dayMOI-10^4 GSE37569	2/300	0.599656	1	0	0	0.995025	0.508855	RPS8;RPL11
A CA 04 2009 7dayMOI-10^3 GSE37569	2/300	0.599656	1	0	0	0.995025	0.508855	ALB;APOE
A CA 04 2009 7dayMOI-10^5 GSE37569	2/300	0.599656	1	0	0	0.995025	0.508855	FABP1;ALB
HCV JFH-1 12Hour GSE20948	2/300	0.599656	1	0	0	0.995025	0.508855	RPL23A;ACTB
HCV JFH1 168Hour-Huh7 GSE29889	2/300	0.599656	1	0	0	0.995025	0.508855	RPS11;GAPDH
HCV 8week+IFN-a GSE37715	2/300	0.599656	1	0	0	0.995025	0.508855	FABP1;APOE
HCoV-EMC2012 7Hour GSE45042	2/300	0.599656	1	0	0	0.995025	0.508855	RPS8;RPS24
RSV 48Hour GSE32138	2/300	0.599656	1	0	0	0.995025	0.508855	RPS15;RPL13
SARS-BatSRBD 36Hour GSE47962	2/300	0.599656	1	0	0	0.995025	0.508855	HSPA8;HSP90AB1
SARS-BatSRBD 48Hour GSE47961	2/300	0.599656	1	0	0	0.995025	0.508855	HSPA8;GAPDH
SARS-BatSRBD 60Hour GSE47961	2/300	0.599656	1	0	0	0.995025	0.508855	PABPC1;RPS11
SARS-BatSRBD 60Hour GSE47962	2/300	0.599656	1	0	0	0.995025	0.508855	HSPA8;HSP90AB1
SARS-BatSRBD 84Hour GSE47961	2/300	0.599656	1	0	0	0.995025	0.508855	RPS27A;RPL19
SARS-BatSRBD 96Hour GSE47962	2/300	0.599656	1	0	0	0.995025	0.508855	LARS2;PABPC1
SARS-BatSRBD Day1 GSE50000	2/300	0.599656	1	0	0	0.995025	0.508855	APOA1;RPL17
SARS-CoV MA15 Day1-PFU-10^5 GSE33266	2/300	0.599656	1	0	0	0.995025	0.508855	C3;RPL14
SARS-CoV MA15 Day2-C57BL6 GSE50878	2/300	0.599656	1	0	0	0.995025	0.508855	RPL5;RPL6
SARS-CoV MA15 Day2-PFU-10^2 GSE33266	2/300	0.599656	1	0	0	0.995025	0.508855	C3;RPL14
SARS-CoV MA15 Day2-PFU-10^4 GSE50000	2/300	0.599656	1	0	0	0.995025	0.508855	RPS29;RPL11
SARS-CoV MA15 Day4-C57BL-6 GSE40824	2/300	0.599656	1	0	0	0.995025	0.508855	FABP1;CD74
SARS-CoV MA15 Day4-PFU-10^5 GSE33266	2/300	0.599656	1	0	0	0.995025	0.508855	RPLP2;PTMA
SARS-CoV MA15 Day4 GSE49262	2/300	0.599656	1	0	0	0.995025	0.508855	EEF1A1;RPS14
SARS-CoV MA15 Day7-C57BL6 GSE50878	2/300	0.599656	1	0	0	0.995025	0.508855	FABP1;RPL8
SARS-CoV MA15 Day7-CXCR3KO GSE50878	2/300	0.599656	1	0	0	0.995025	0.508855	RPL3;RPL7
SARS-CoV MA15 Day7-PFU-10^2 GSE33266	2/300	0.599656	1	0	0	0.995025	0.508855	AHSG;RPS23
SARS-CoV MA15 Day7-PFU-10^5 GSE33266	2/300	0.599656	1	0	0	0.995025	0.508855	RPLP2;EEF2
SARS-CoV 24Hour GSE17400	2/300	0.599656	1	0	0	0.995025	0.508855	RPLP0;ACTB
SARS-CoV 36Hour GSE47962	2/300	0.599656	1	0	0	0.995025	0.508855	HSPA8;RPS27A
SARS-CoV 48Hour GSE17400	2/300	0.599656	1	0	0	0.995025	0.508855	RPL14;RPL19
SARS-CoV 48Hour GSE47961	2/300	0.599656	1	0	0	0.995025	0.508855	HSP90AB1;GAPDH
SARS-CoV 72Hour GSE47961	2/300	0.599656	1	0	0	0.995025	0.508855	UBB;FTH1
SARS-CoV 84Hour GSE47960	2/300	0.599656	1	0	0	0.995025	0.508855	HSP90AB1;FAU
SARS-dORF6 12Hour GSE47960	2/300	0.599656	1	0	0	0.995025	0.508855	EEF1A1;PTMA
SARS-dORF6 48Hour GSE47960	2/300	0.599656	1	0	0	0.995025	0.508855	HSPA8;RPL14
SARS-dORF6 84Hour GSE47960	2/300	0.599656	1	0	0	0.995025	0.508855	RPL41;RPL19
SARS-ddORF6 48Hour GSE47961	2/300	0.599656	1	0	0	0.995025	0.508855	HSP90AB1;PSAP
cSARS Bat SRBD 12Hour GSE37827	2/300	0.599656	1	0	0	0.995025	0.508855	RPL11;ACTB
hMPV 48Hour GSE8961	2/300	0.599656	1	0	0	0.995025	0.508855	RPL3;APOC1
hMPV 72Hour GSE8961	2/300	0.599656	1	0	0	0.995025	0.508855	RPL3;FGG
icSARA deltaORF6 24Hour GSE33267	2/300	0.599656	1	0	0	0.995025	0.508855	FTH1;RPL26
icSARA deltaORF6 72Hour GSE33267	2/300	0.599656	1	0	0	0.995025	0.508855	RPL13;RPL26
icSARA deltaORF6 7Hour GSE33267	2/300	0.599656	1	0	0	0.995025	0.508855	HSP90AB1;RPS24
icSARS CoV 48Hour GSE33267	2/300	0.599656	1	0	0	0.995025	0.508855	LARS2;RPL14
icSARS CoV 54Hour GSE33267	2/300	0.599656	1	0	0	0.995025	0.508855	RPLP1;RPL26
icSARS-Cov Day2 GSE50000	2/300	0.599656	1	0	0	0.995025	0.508855	APOA1;RPS12
A-CA-04-2009(H1N1) 0Hour GSE47960	1/300	0.868931	1	0	0	0.497512	0.0698962	LARS2
A-CA-04-2009(H1N1) 12Hour GSE37571	1/300	0.868931	1	0	0	0.497512	0.0698962	HSPA8
A-CA-04-2009(H1N1) 18Hour GSE37571	1/300	0.868931	1	0	0	0.497512	0.0698962	RPL3
A-CA-04-2009(H1N1) 24Hour GSE47961	1/300	0.868931	1	0	0	0.497512	0.0698962	GPX1
A-CA-04-2009(H1N1) 24Hour GSE37571	1/300	0.868931	1	0	0	0.497512	0.0698962	RPS4X
A-CA-04-2009(H1N1) 7Hour GSE37571	1/300	0.868931	1	0	0	0.497512	0.0698962	RPL41
A-CA-04-2009(H1N1) Day3 GSE36328	1/300	0.868931	1	0	0	0.497512	0.0698962	RPL7
A-Netherlands-602-2009(H1N1) 0Hour GSE40844	1/300	0.868931	1	0	0	0.497512	0.0698962	RPS2
A-Netherlands-602-2009(H1N1) 3Hour GSE40844	1/300	0.868931	1	0	0	0.497512	0.0698962	APOA1
A-VN-1203-2004(H5N1) Day1-10^4pfu GSE33263	1/300	0.868931	1	0	0	0.497512	0.0698962	FGG
A-VN-1203-2004(H5N1) Day2-10^4pfu GSE33263	1/300	0.868931	1	0	0	0.497512	0.0698962	RPLP2
A-VN-1203-2004(H5N1) Day4-10^3pfu GSE33263	1/300	0.868931	1	0	0	0.497512	0.0698962	RPLP1
A-VN-1203-2004(H5N1) Day4-10^4pfu GSE33263	1/300	0.868931	1	0	0	0.497512	0.0698962	RPLP1
A-VN-1203-2004(H5N1) Day7-10^2pfu GSE33263	1/300	0.868931	1	0	0	0.497512	0.0698962	ACTG1
A-VN-1203-2004(H5N1) Day7-10^3pfu GSE33263	1/300	0.868931	1	0	0	0.497512	0.0698962	ACTG1
A-Vietnam-1203 CIP048 RG3-2004(H5N1)mutPB1-F2del 0Hour GSE43203	1/300	0.868931	1	0	0	0.497512	0.0698962	RPS27A
A-Vietnam-1203 CIP048 RG3-2004(H5N1)mutPB1-F2del 12Hour GSE43203	1/300	0.868931	1	0	0	0.497512	0.0698962	UBC
A-Vietnam-1203 CIP048 RG3-2004(H5N1)mutPB1-F2del 18Hour GSE43203	1/300	0.868931	1	0	0	0.497512	0.0698962	UBC
A-Vietnam-1203 CIP048 RG3-2004(H5N1)mutPB1-F2del 24Hour GSE43203	1/300	0.868931	1	0	0	0.497512	0.0698962	C3
A-Vietnam-1203 CIP048 RG3-2004(H5N1)mutPB2-627E 12Hour GSE43203	1/300	0.868931	1	0	0	0.497512	0.0698962	UBC
A-Vietnam-1203 CIP048 RG4-2004(H5N1)HAAvirmut 1day-MOI-10^4 GSE37572	1/300	0.868931	1	0	0	0.497512	0.0698962	EEF1G
A-Vietnam-1203 CIP048 RG4-2004(H5N1)HAAvirmut 7day-MOI-10^4 GSE37572	1/300	0.868931	1	0	0	0.497512	0.0698962	RPL7
A-Vietnam-1203 CIP048 RG4-2004(H5N1)NS1trunc124 2day-MOI-10^4 GSE44445	1/300	0.868931	1	0	0	0.497512	0.0698962	RPS6
A-Vietnam-1203 CIP048 RG4-2004(H5N1)NS1trunc 18Hour GSE43204	1/300	0.868931	1	0	0	0.497512	0.0698962	HSP90B1
A-Vietnam-1203 CIP048 RG4-2004(H5N1)NS1trunc 3Hour GSE43204	1/300	0.868931	1	0	0	0.497512	0.0698962	IFITM3
A-Vietnam-1203 CIP048 RG4-2004(H5N1)PB2-627E 2day-MOI-10^4 GSE43301	1/300	0.868931	1	0	0	0.497512	0.0698962	RPS5
A CA 04 2009 7dayMOI-10^4 GSE37569	1/300	0.868931	1	0	0	0.497512	0.0698962	ALB
Ebolavirus(EBOV) 1day Splenocytes GSE17509	1/300	0.868931	1	0	0	0.497512	0.0698962	FGA
HCoV-EMC2012 0Hour GSE45042	1/300	0.868931	1	0	0	0.497512	0.0698962	RPL12
HCoV-EMC2012 24Hour GSE45042	1/300	0.868931	1	0	0	0.497512	0.0698962	C3
HEV 60Day GSE53731	1/300	0.868931	1	0	0	0.497512	0.0698962	FTH1
HIV Infected-mDC GSE42058	1/300	0.868931	1	0	0	0.497512	0.0698962	RPS27A
RSV 24Hour GSE3397	1/300	0.868931	1	0	0	0.497512	0.0698962	RPL37A
RSV 4Hour GSE3397	1/300	0.868931	1	0	0	0.497512	0.0698962	EEF1G
RV16 0Hour-B2B GSE28904	1/300	0.868931	1	0	0	0.497512	0.0698962	PTMA
Rabies CVS-11 7day-Spinalcord GSE30577	1/300	0.868931	1	0	0	0.497512	0.0698962	RPS3
SARS-BatSRBD 0Hour GSE47960	1/300	0.868931	1	0	0	0.497512	0.0698962	UBB
SARS-BatSRBD 0Hour GSE47961	1/300	0.868931	1	0	0	0.497512	0.0698962	RPL6
SARS-BatSRBD 12Hour GSE47962	1/300	0.868931	1	0	0	0.497512	0.0698962	ACTG1
SARS-BatSRBD 96Hour GSE47961	1/300	0.868931	1	0	0	0.497512	0.0698962	HSP90AB1
SARS-BatSRBD Day7 GSE50000	1/300	0.868931	1	0	0	0.497512	0.0698962	APOA1
SARS-CoV MA15 Day1-PFU-10^4 GSE33266	1/300	0.868931	1	0	0	0.497512	0.0698962	C3
SARS-CoV MA15 Day1 GSE49262	1/300	0.868931	1	0	0	0.497512	0.0698962	RPL4
SARS-CoV MA15 Day2-PFU-10^3 GSE33266	1/300	0.868931	1	0	0	0.497512	0.0698962	C3
SARS-CoV MA15 Day2-PFU-10^5 GSE50000	1/300	0.868931	1	0	0	0.497512	0.0698962	RPL11
SARS-CoV MA15 Day2 GSE49262	1/300	0.868931	1	0	0	0.497512	0.0698962	RPS14
SARS-CoV MA15 Day4-PFU-10^4 GSE50000	1/300	0.868931	1	0	0	0.497512	0.0698962	CD74
SARS-CoV MA15 Day7-PFU-10^3 GSE33266	1/300	0.868931	1	0	0	0.497512	0.0698962	RPL7
SARS-CoV MA15 Day7-PFU-10^4 GSE33266	1/300	0.868931	1	0	0	0.497512	0.0698962	RPL26
SARS-CoV MA15 Day7-PFU-10^5 GSE50000	1/300	0.868931	1	0	0	0.497512	0.0698962	RPL7
SARS-CoV MA15 Day7 GSE49263	1/300	0.868931	1	0	0	0.497512	0.0698962	RPL7
SARS-CoV 0Hour GSE47960	1/300	0.868931	1	0	0	0.497512	0.0698962	LARS2
SARS-CoV 12Hour GSE47962	1/300	0.868931	1	0	0	0.497512	0.0698962	PABPC1
SARS-CoV 24Hour GSE47962	1/300	0.868931	1	0	0	0.497512	0.0698962	GPX1
SARS-CoV 72Hour GSE47960	1/300	0.868931	1	0	0	0.497512	0.0698962	RPS27A
SARS-CoV 72Hour GSE47962	1/300	0.868931	1	0	0	0.497512	0.0698962	GAPDH
SARS-CoV 84Hour GSE47962	1/300	0.868931	1	0	0	0.497512	0.0698962	GPX1
SARS-CoV 96Hour GSE47961	1/300	0.868931	1	0	0	0.497512	0.0698962	RPL6
SARS-dORF6 0Hour GSE47960	1/300	0.868931	1	0	0	0.497512	0.0698962	CFB
SARS-dORF6 36Hour GSE47962	1/300	0.868931	1	0	0	0.497512	0.0698962	HSPA8
SARS-dORF6 60Hour GSE47960	1/300	0.868931	1	0	0	0.497512	0.0698962	S100A9
SARS-dORF6 72Hour GSE47960	1/300	0.868931	1	0	0	0.497512	0.0698962	RPS27A
SARS-ddORF6 60Hour GSE47961	1/300	0.868931	1	0	0	0.497512	0.0698962	LARS2
SARS-ddORF6 96Hour GSE47961	1/300	0.868931	1	0	0	0.497512	0.0698962	PSAP
cSARS Bat SRBD 36Hour GSE37827	1/300	0.868931	1	0	0	0.497512	0.0698962	RPL14
cSARS Bat SRBD 54Hour GSE37827	1/300	0.868931	1	0	0	0.497512	0.0698962	RPL14
cSARS Bat SRBD 72Hour GSE37827	1/300	0.868931	1	0	0	0.497512	0.0698962	RPLP0
hMPV 12Hour GSE8961	1/300	0.868931	1	0	0	0.497512	0.0698962	FGG
hMPV 6Hour GSE8961	1/300	0.868931	1	0	0	0.497512	0.0698962	FGB
icSARA deltaORF6 0Hour GSE33267	1/300	0.868931	1	0	0	0.497512	0.0698962	HIST1H3B
icSARA deltaORF6 30Hour GSE33267	1/300	0.868931	1	0	0	0.497512	0.0698962	EEF1A1
icSARA deltaORF6 36Hour GSE33267	1/300	0.868931	1	0	0	0.497512	0.0698962	RPLP2
icSARA deltaORF6 48Hour GSE33267	1/300	0.868931	1	0	0	0.497512	0.0698962	LARS2
icSARS CoV 12Hour GSE37827	1/300	0.868931	1	0	0	0.497512	0.0698962	FGB
icSARS CoV 24Hour GSE33267	1/300	0.868931	1	0	0	0.497512	0.0698962	RPL12
icSARS CoV 30Hour GSE37827	1/300	0.868931	1	0	0	0.497512	0.0698962	RPL14
icSARS CoV 36Hour GSE33267	1/300	0.868931	1	0	0	0.497512	0.0698962	APOC1
icSARS CoV 3Hour GSE33267	1/300	0.868931	1	0	0	0.497512	0.0698962	PSAP
icSARS CoV 60Hour GSE33267	1/300	0.868931	1	0	0	0.497512	0.0698962	RPL13
icSARS CoV 72Hour GSE33267	1/300	0.868931	1	0	0	0.497512	0.0698962	TTR
icSARS CoV 7Hour GSE37827	1/300	0.868931	1	0	0	0.497512	0.0698962	RPL36A
icSARS-Cov Day4 GSE50000	1/300	0.868931	1	0	0	0.497512	0.0698962	RPS11
icSARS-Cov Day7 GSE50000	1/300	0.868931	1	0	0	0.497512	0.0698962	APOA1

## Sheet: Drug Perturbations from GEO up
Term	Overlap	P-value	Adjusted P-value	Old P-value	Old Adjusted P-value	Odds Ratio	Combined Score	Genes
coenzyme Q10 5281915 mouse GSE15129 sample 3464	64/302	1.32423e-81	1.19975e-78	0	0	31.6299	5890.4	IFITM3;RPL4;H2-T23;ORM1;RPL3;RPL32;RPLP1;RPLP0;HP;HBA-A2;RPL6;ACTB;RPL7;ACTG1;RPS15;RPS4X;RPS14;RPL7A;RPS17;RPS18;FTH1;TMSB4X;RPL36;RPL38;RPS11;B2M;FGB;FGA;RPS7;FGG;RPL13A;EEF1A1;RPL37A;RPL26;PABPC1;S100A9;PTMA;GAPDH;S100A8;H2-D1;LYZ2;RPL12;RPL11;RPL36A;HPX;RPL14;RPL13;GC;RPL19;CD74;RPL41;AMBP;MT2;RPL23A;MT1;H2-AA;FABP1;RPS29;RPS3A1;RPS27RT;LCN2;IFI27L2A;RPS24;RPS23
coenzyme Q10 5281915 mouse GSE15129 sample 3456	63/396	1.05446e-71	4.77672e-69	0	0	23.7449	3880.64	IFITM3;RPL4;RPL5;H2-T23;RPL3;HSP90AB1;RPL32;RPLP1;RPLP0;RPL8;RPL6;ACTB;RPL7;ACTG1;RPS15;RPS4X;RPS14;RPS17;RPS18;TMSB4X;RPL36;RPLP2;RPL38;RPS11;B2M;RPS12;GPX1;RPS7;RPS8;RPS5;RPL13A;RPSA;EEF1A1;RPL37A;RPL26;PABPC1;PTMA;H2-D1;LYZ2;RPL12;RPL11;RPL36A;HSP90B1;C3;UBC;RPL14;RPL13;APOE;RPS27A;RPL19;CD74;RPL23A;MT1;EEF2;H2-AA;RPS29;RPS3A1;RPS27RT;FAU;IFI27L2A;RPS21;RPS24;RPS23
captopril DB01197 mouse GSE19286 sample 2689	47/134	1.76372e-70	5.32643e-68	0	0	52.3502	8408.15	RPL4;RPL5;RPL3;RPLP1;RPL12;RPLP0;RPL8;ACTB;ACTG1;RPL7;RPS15;C3;RPS4X;RPS14;RPL7A;RPS17;RPS18;TMSB4X;RPL36;RPL14;RPLP2;RPL13;RPL38;RPS2;RPS11;RPS27A;RPL17;RPS12;RPL19;RPL41;RPS7;RPS8;RPS5;RPL13A;RPSA;RPL23A;EEF1A1;RPS29;RPS3A1;RPS27RT;RPL37A;RPL26;RPS21;PTMA;RPS24;TPT1;RPS23
ubiquinol 9962735 mouse GSE15129 sample 3463	60/346	2.27526e-70	5.15347e-68	0	0	25.8821	4150.43	RPL3;HSP90AB1;RPL32;RPLP1;RPLP0;HP;RPL8;RPL6;RPL7;RPS15;RPS4X;RPS14;RPL7A;RPS17;FTL1;RPS18;FTH1;RPL36;RPLP2;RPL38;RPS11;RPS12;RPS9;WFDC21;RPS7;RPS8;RPS5;FGG;RPL13A;APOA1;EEF1A1;RPL37A;RPL26;GAPDH;RPL12;RPL11;RPL36A;HPX;RPL14;RPL13;RPS2;GC;RPS27A;RPL17;RPL19;HSPA8;MT2;RPL23A;MT1;EEF2;FABP1;RPS29;RPS3A1;APOC1;FAU;RPS21;HAMP;RPS24;TPT1;RPS23
N-METHYLFORMAMIDE 31254 rat GSE5509 sample 3570	56/283	8.86667e-69	1.60664e-66	0	0	29.5343	4627.91	RPL4;RPL5;ORM1;RPL3;HSP90AB1;RPL32;RPLP1;RPLP0;RPL8;RPL6;RPL7;ACTG1;RPS15;RPS4X;RPS14;RPL7A;RPS17;FTL1;RPS18;FTH1;RPL36;RPL38;RPS11;RPS12;RPS9;RPS7;RPS8;RPS5;RPS6;RPL13A;RPSA;EEF1A1;EEF1G;RPL26;PABPC1;RPL12;RPL11;RPL36A;HSP90B1;RPS3;RPS2;RPS27A;RPL17;RPL19;HSPA8;RPL41;RPL23A;EEF2;BST2;RPS29;FAU;RPS21;HAMP;RPS24;TPT1;RPS23
1-Naphthyl isothiocyanate 11080 rat GSE5509 sample 3568	56/301	3.79768e-67	5.7345e-65	0	0	27.7681	4246.83	IFITM3;RPL4;RPL5;ORM1;RPL3;HSP90AB1;RPL32;RPLP1;RPLP0;HP;RPL6;ACTB;ACTG1;RPS15;RPS4X;RPS14;RPL7A;RPS17;FTL1;RPS18;TMSB4X;RPS11;RPS12;FGA;RPS9;WFDC21;RPS7;RPS8;RPS5;RPS6;FGG;RPL13A;APOA1;RPSA;EEF1A1;MYH9;RPL26;PABPC1;PTMA;GAPDH;LYZ2;RPL12;RPL11;HSP90B1;HPX;RPS2;RPS27A;RPL17;RPL19;HSPA8;RPL41;RPL23A;LCN2;FAU;HAMP;RPS23
fenretinide 5288209 rat GSE3952 sample 3561	59/397	6.9808e-65	9.03515e-63	0	0	22.1813	3276.73	IFITM3;RPL5;ORM1;RPL3;HSP90AB1;HP;RPL8;RPL6;ACTB;ACTG1;RPS15;RPL7A;RPS17;FTL1;RPS18;RPL36;RPLP2;RPS11;RPS12;FGA;RPS9;RPS7;AHSG;RPS5;RPS6;FGG;APOA2;RPSA;EEF1A1;EEF1G;MYH9;RPL26;S100A9;PTMA;GAPDH;S100A8;RPL12;RPL11;HSP90B1;C3;HPX;TTR;UBB;UBC;APOE;RPS2;GC;RPS27A;RPL17;RPL19;CD74;RPL41;AMBP;EEF2;FABP1;ALB;APOC1;RPS21;TPT1
coenzyme Q10 5281915 mouse GSE15129 sample 3462	50/257	1.48831e-60	1.68551e-58	0	0	29.0377	4000.16	H2-T23;RPL32;RPLP1;HP;RPL6;RPL7;ACTG1;RPS15;RPS4X;RPL7A;FTL1;RPS18;TMSB4X;RPL36;RPLP2;RPL38;RPS11;B2M;FGB;FGA;RPS9;GPX1;RPS7;FGG;APOA1;EEF1A1;RPL37A;RPL26;RPL11;RPL36A;TTR;UBC;RPL14;APOE;RPS2;GC;AMBP;SERPINA3K;RPL23A;FABP1;RPS29;RPS3A1;APOC1;SAA1;SAA2;FAU;RPS21;HAMP;RPS24;RPS23
bexarotene DB00307 human GSE6914 sample 2680	43/147	3.02804e-60	3.04823e-58	0	0	43.6593	5983.38	RPL4;RPL3;RPL32;RPL12;RPLP0;RPL11;RPL36A;RPL8;RPL6;RPS15;RPS4X;RPS14;RPL7A;RPS17;RPS18;UBC;RPS3;RPL14;RPLP2;RPL13;RPL38;RPS11;RPS27A;RPL17;RPS12;RPL19;RPS9;RPL41;RPS5;RPS6;RPL13A;RPSA;RPL23A;EEF1A1;EEF1G;RPS29;RPL37A;RPL26;FAU;RPS21;GAPDH;RPS24;RPS23
FENRETINIDE 5288209 rat GSE3952 sample 3563	52/345	5.98757e-57	5.42474e-55	0	0	22.4962	2912.31	IFITM3;ORM1;RPL3;HSP90AB1;RPLP0;HP;RPL8;RPL6;ACTB;ACTG1;RPS15;RPS4X;RPS14;RPL7A;FTL1;RPS18;FTH1;TMSB4X;RPL36;RPS11;RPS12;GPX1;RPS7;RPS5;APOA2;RPL13A;RPSA;EEF1G;RPL26;PTMA;GAPDH;CFB;LYZ2;RPL12;RPL11;HPX;UBB;RPS3;RPL14;APOE;RPS2;RPL17;RPL19;HSPA8;CD74;FABP1;ALB;APOC1;LCN2;FAU;RPS21;RPS23
N-NITROSODIMETHYLAMINE 6124 rat GSE5509 sample 3569	50/302	8.83044e-57	7.27307e-55	0	0	24.7109	3189.41	IFITM3;RPL4;RPL5;ORM1;RPL3;RPLP0;HP;RPL8;RPL6;RPL7;RPS4X;RPS14;RPL7A;RPS17;FTL1;TMSB4X;RPS12;FGB;RPS9;WFDC21;RPS7;RPS8;RPS5;RPS6;FGG;APOA1;RPSA;EEF1A1;EEF1G;RPL26;S100A9;PTMA;GAPDH;LYZ2;RPL12;RPL11;HSP90B1;HPX;RPS3;RPS2;RPS27A;RPL17;RPL19;RPL23A;RPS29;LCN2;HAMP;RPS24;TPT1;RPS23
Leptin DB05098 mouse GSE3293 sample 3592	47/247	3.05785e-56	2.30868e-54	0	0	28.4005	3630.35	IFITM3;RPL5;RPL3;LYZ2;RPLP1;HP;HSP90B1;C3;HPX;SERPINA1C;TTR;RPS18;TMSB4X;PSAP;RPLP2;APOE;RPS11;B2M;FGA;CD74;RPS9;WFDC21;RPL41;RPS7;AHSG;RPS5;APOA1;RPL23A;H2-AA;EEF1A1;FABP1;RPS29;RPS3A1;ALB;RPS27RT;LCN2;SAA1;SAA2;RPL26;S100A9;RPS21;HAMP;PTMA;S100A8;RPS24;TPT1;RPS23
ubiquinol 9962735 mouse GSE15129 sample 3459	49/288	3.37688e-56	2.35342e-54	0	0	25.3939	3243.5	RPL4;RPL5;H2-T23;HSP90AB1;RPL32;RPLP0;HBA-A2;RPL8;RPL6;RPL7;RPS15;RPS14;RPL7A;RPS17;RPS18;RPL36;RPLP2;RPS11;B2M;RPS12;RPS9;RPS7;RPS8;RPS5;RPL13A;RPSA;RPL37A;RPL26;PABPC1;RPL12;RPL11;HSP90B1;UBC;PSAP;RPS3;RPL14;RPL13;APOE;RPS2;RPS27A;RPL19;RPL41;RPL23A;RPS3A1;RPS27RT;FAU;RPS21;RPS24;RPS23
MK-886 CID 3651377 human GSE3202 sample 3192	43/182	1.06326e-55	6.88083e-54	0	0	35.2632	4463.65	RPL4;RPL5;RPL3;RPL32;RPLP1;RPL12;RPLP0;RPL8;RPL6;RPL7;RPS4X;RPS17;RPS18;FTH1;RPL36;RPS3;RPLP2;RPL13;RPL38;RPS2;RPS11;RPL17;RPL19;RPS9;RPL41;RPS8;RPS5;RPS6;RPL13A;RPSA;RPL23A;EEF2;EEF1A1;EEF1G;RPS29;RPL37A;PABPC1;FAU;RPS21;PTMA;RPS24;TPT1;RPS23
fluticasone 5311101 human GSE15823 sample 3090	51/351	6.30365e-55	3.80741e-53	0	0	21.6864	2706.49	RPL4;RPL5;RPL3;HSP90AB1;RPL32;RPLP1;RPLP0;RPL8;RPL6;RPL7;ACTG1;RPS15;RPS4X;RPS14;RPS17;RPS18;RPLP2;RPL38;RPS11;RPS12;RPS9;RPS7;RPS5;RPS6;RPL13A;EEF1A1;EEF1G;RPL37A;MYH9;GAPDH;RPL12;RPL11;RPL36A;UBB;UBC;RPS3;RPL14;RPL13;RPS2;RPL17;RPL19;RPL41;EEF2;RPS29;LCN2;SAA1;FAU;RPS21;RPS24;TPT1;RPS23
imatinib (glivec) 123596 human GSE12211 sample 2518	40/158	4.84004e-53	2.74067e-51	0	0	37.7858	4551.68	RPL5;RPL3;RPL32;RPLP1;RPL12;RPL11;RPL36A;RPL7;RPS15;RPS4X;TMSB4X;UBC;RPL36;RPLP2;RPL13;RPS2;RPS11;RPS27A;B2M;RPL17;RPS12;RPL19;CD74;RPS9;RPS7;RPS5;RPS6;RPL13A;RPL23A;EEF2;EEF1G;RPS29;RPL26;FAU;S100A9;RPS21;S100A8;RPS24;TPT1;RPS23
PRISTANE 15979 mouse GSE17297 sample 3228	45/261	1.15612e-51	6.16142e-50	0	0	25.7334	3018.19	IFITM3;RPL4;RPL3;RPL32;LYZ2;RPLP1;RPLP0;HP;RPL6;ACTB;RPL7;ACTG1;C3;RPS4X;RPS14;FTH1;TMSB4X;RPL38;APOE;RPS2;RPS11;RPS27A;B2M;RPL17;CD74;RPL41;GPX1;RPS7;RPS8;RPS5;MT2;RPL23A;MT1;EEF1A1;RPS29;RPS3A1;RPS27RT;RPL37A;LCN2;S100A9;RPS21;PTMA;S100A8;TPT1;RPS23
coenzyme Q10 5281915 mouse GSE15129 sample 3460	44/246	3.22633e-51	1.62392e-49	0	0	26.6958	3103.67	IFITM3;RPL4;RPL3;RPL32;LYZ2;RPL12;RPL11;RPL36A;RPL6;ACTB;RPL7;C3;RPS14;RPS17;TMSB4X;RPL14;RPL13;RPL38;APOE;RPS11;RPS27A;B2M;RPL17;RPL19;CD74;RPS8;RPS5;RPL13A;RPSA;MT2;RPL23A;MT1;H2-AA;EEF1A1;RPS29;RPS3A1;RPS27RT;RPL37A;RPL26;PABPC1;IFI27L2A;PTMA;RPS24;TPT1
SODIUM PYRUVATE 23662274 mouse GSE5497 sample 3565	40/177	7.83316e-51	3.73518e-49	0	0	33.7297	3891.51	IFITM3;RPL4;RPL3;RPLP1;RPL12;RPLP0;RPL36A;RPL8;RPL6;ACTB;ACTG1;RPS15;RPS4X;RPS14;RPL7A;RPS17;FTL1;RPS18;FTH1;TMSB4X;PSAP;RPLP2;RPL13;RPS2;RPL19;RPL41;GPX1;RPS7;RPS5;RPSA;RPL23A;EEF1A1;RPS3A1;RPL37A;RPL26;FAU;RPS21;GAPDH;TPT1;RPS23
glipizide DB01067 mouse GSE2431 sample 2749	44/262	6.27096e-50	2.84074e-48	0	0	25.0655	2839.76	RPL5;HSP90AB1;RPLP1;RPLP0;HP;RPL8;RPL6;ACTB;SERPINA1A;RPL7A;SERPINA1B;RPS17;TTR;TMSB4X;PSAP;RPL36;RPS3;RPL13;APOE;RPS11;RPS27A;B2M;RPL19;HSPA8;CD74;WFDC21;RPL41;AHSG;RPS5;FGG;APOA1;MT1;EEF2;H2-AA;EEF1A1;RPS3A1;RPS27RT;RPL37A;APOC1;HAMP;PTMA;RPS24;TPT1;RPS23
lung cancer DB00928 human GSE29077 sample 2535	43/245	1.25414e-49	5.41072e-48	0	0	26.1956	2949.63	RPL4;RPL5;RPL3;RPL32;RPLP1;RPL12;RPLP0;RPL36A;RPL8;RPS15;RPS4X;RPL7A;RPS17;UBB;RPS18;FTH1;UBC;RPL36;RPS3;RPLP2;RPL13;RPS2;RPS11;RPL17;RPS12;RPL19;RPL41;RPS7;RPS5;RPS6;RPL13A;RPSA;RPL23A;EEF2;CCNB1IP1;EEF1A1;EEF1G;RPS29;APOC1;PABPC1;FAU;RPS24;TPT1
ubiquinol 9962735 mouse GSE15129 sample 3465	49/387	1.37454e-49	5.66062e-48	0	0	18.8978	2126.16	IFITM3;RPL5;H2-T23;RPL3;RPL32;RPLP1;RPLP0;RPL8;RPL6;ACTG1;RPS15;RPS14;RPL7A;RPS17;RPS18;RPL36;RPLP2;RPL38;RPS11;WFDC21;GPX1;RPS7;RPS8;RPS5;RPL13A;RPL37A;RPL26;RPL11;RPL36A;RPS3;RPL14;RPL13;RPS27A;RPL17;RPL19;RPL41;MT2;RPL23A;MT1;FABP1;RPS29;RPS3A1;RPS27RT;SAA1;FAU;RPS21;HAMP;RPS24;RPS23
Calcitonin 16132288 mouse GSE60761 sample 3447	39/177	4.7206e-49	1.85951e-47	0	0	32.8864	3659.43	IFITM3;RPL4;LYZ2;RPLP1;RPL12;RPLP0;ACTB;RPL7;ACTG1;RPS4X;RPL7A;FTL1;RPS18;FTH1;TMSB4X;PSAP;RPLP2;RPL38;APOE;RPS2;RPS11;RPS27A;B2M;RPL19;RPS5;RPL13A;RPSA;RPL23A;EEF2;EEF1A1;EEF1G;RPS29;RPS3A1;RPL37A;PABPC1;FAU;RPS21;GAPDH;TPT1
doxorubicin, 2xEC50, 5 d 31703 human GSE6930 sample 3265	34/107	8.26863e-49	3.12141e-47	0	0	47.4264	5250.78	RPL5;RPL32;RPLP1;RPL12;RPLP0;RPL6;ACTG1;RPL7;RPS15;RPS4X;RPS17;UBB;RPS18;TMSB4X;RPL14;RPL38;RPS2;RPS27A;RPL17;RPS12;RPL41;RPS6;RPL13A;RPSA;RPL23A;EEF1A1;RPS29;RPL37A;FAU;RPS21;PTMA;RPS24;TPT1;RPS23
genistein 5280961 mouse GSE2889 sample 3604	38/163	8.50557e-49	3.08242e-47	0	0	34.7953	3851.36	IFITM3;RPL4;RPL5;RPL3;H2-K1;HBA-A2;RPL6;ACTB;C3;RPS4X;RPS14;RPL7A;RPS17;FTH1;TMSB4X;PSAP;RPS3;RPLP2;RPS2;RPS11;B2M;CD74;RPL41;RPS5;RPSA;MT2;RPL23A;EEF2;H2-AA;EEF1A1;EEF1G;RPS29;RPS3A1;FAU;PTMA;S100A8;H2-D1;TPT1
estradiol 5757 mouse GSE2889 sample 3609	38/167	2.36986e-48	8.25804e-47	0	0	33.9619	3724.31	RPL4;RPL5;H2-T23;H2-K1;RPL8;RPL6;ACTB;RPL7;ACTG1;RPS15;RPS4X;RPS14;RPL7A;RPS17;FTH1;TMSB4X;PSAP;RPLP2;RPL38;APOE;RPS2;B2M;RPL19;CD74;RPS5;RPSA;RPL23A;EEF2;H2-AA;EEF1A1;EEF1G;RPL37A;RPL26;FAU;RPS21;PTMA;H2-D1;TPT1
coenzyme Q10 5281915 mouse GSE15129 sample 3450	38/174	1.33224e-47	4.47039e-46	0	0	32.5956	3518.2	RPL4;RPL3;RPL32;RPLP1;RPLP0;RPL11;RPL6;ACTB;RPL7;ACTG1;RPS15;RPS4X;RPS14;RPL7A;RPS17;FTH1;UBC;RPL36;RPL14;RPLP2;RPL13;RPL38;RPS11;RPS27A;B2M;RPL19;RPL41;RPS8;RPS5;RPL13A;RPL23A;RPS3A1;RPS27RT;RPL37A;FAU;RPS21;RPS24;TPT1
pioglitazone DB01132 rat GSE21329 sample 2843	48/400	2.31348e-47	7.48575e-46	0	0	17.9104	1923.27	IFITM3;RPL4;RPL5;RPL3;HSP90AB1;RPL32;LYZ2;RPLP1;RPL12;RPLP0;RPL11;RPL36A;ACTB;RPL7;ACTG1;HSP90B1;RPS14;RPL7A;RPS17;FTL1;UBB;FTH1;TMSB4X;UBC;RPL38;RPS2;RPS11;RPS27A;B2M;RPL17;RPS12;RPL19;RPL41;GPX1;RPS7;RPS8;RPS5;RPS6;RPSA;EEF1A1;EEF1G;FAU;RPS21;PTMA;GAPDH;RPS24;TPT1;RPS23
Hydrogen Peroxide 784 mouse GSE3078 sample 3596	37/160	2.43537e-47	7.60843e-46	0	0	34.5149	3704.54	RPL5;RPL3;RPLP1;RPL12;RPLP0;RPL6;ACTB;ACTG1;RPS4X;RPS14;RPL7A;RPS17;RPS18;FTH1;TMSB4X;RPS3;RPL38;RPS2;RPS11;RPL19;RPL41;RPS7;RPS5;RPL23A;EEF2;EEF1A1;EEF1G;RPS29;RPS3A1;RPS27RT;RPL37A;RPL26;PABPC1;FAU;GAPDH;TPT1;RPS23
diethylstilbestrol DB00255 rat GSE4028 sample 2717	40/222	1.54198e-46	4.65678e-45	0	0	26.8926	2836.78	RPL4;RPL5;RPL32;RPLP1;RPL12;RPLP0;RPL11;RPL36A;RPL8;RPL6;RPS15;RPL7A;RPS17;FTL1;RPS18;RPS3;RPL14;RPL38;RPS2;RPS11;RPS27A;RPL17;RPS12;RPL19;RPS9;RPS7;RPS6;RPL13A;RPSA;EEF2;EEF1A1;EEF1G;RPS29;RPL26;PABPC1;FAU;RPS21;RPS24;TPT1;RPS23
diethylstilbestrol DB00255 rat GSE4028 sample 2716	40/226	3.31844e-46	9.69841e-45	0	0	26.4166	2766.33	RPL4;RPL5;RPL32;RPLP1;RPL12;RPLP0;RPL11;RPL36A;RPL8;RPL6;HSP90B1;RPS15;RPL7A;RPS17;FTL1;RPS18;RPS3;RPL14;RPS2;RPS11;RPS27A;RPL17;RPS12;RPL19;RPS9;GPX1;RPS7;RPS5;RPS6;RPSA;EEF2;EEF1A1;EEF1G;RPS29;RPL26;PABPC1;RPS21;RPS24;TPT1;RPS23
2,2',4,4',5,5'-Hexachlorobiphenyl (PCB-153) 37034 human GSE6878 sample 3349	39/211	8.32261e-46	2.35634e-44	0	0	27.5872	2863.55	IFITM3;RPL4;RPL5;ORM1;RPL32;RPLP0;RPL11;HP;ORM2;ACTG1;HSP90B1;C3;RPS4X;TTR;RPS18;PSAP;APOE;RPS2;RPS12;FGA;RPL41;RPS7;AMBP;AHSG;RPS5;RPS6;FGG;APOA2;APOA1;RPL23A;EEF2;EEF1A1;FABP1;RPS29;ALB;APOC1;GAPDH;TPT1;RPS23
2,2',4,4',5,5'-Hexachlorobiphenyl (PCB-153) 37034 human GSE6878 sample 3350	36/158	8.87163e-46	2.43567e-44	0	0	34.0072	3527.77	IFITM3;HSP90AB1;RPLP0;RPL11;HP;ACTB;ACTG1;C3;RPS4X;RPS17;TTR;RPS18;UBC;RPS3;APOE;RPS2;RPS12;HSPA8;RPL41;RPS7;AHSG;RPS6;FGG;APOA2;APOA1;RPL23A;EEF1A1;FABP1;ALB;RPL37A;APOC1;RPS21;HAMP;GAPDH;TPT1;RPS23
vitamin e DB00163 mouse GSE42813 sample 3515	43/298	9.34904e-46	2.49124e-44	0	0	21.5366	2232.99	IFITM3;RPL4;RPL32;LYZ2;RPLP1;RPL12;H2-K1;RPLP0;RPL11;RPL36A;RPL8;RPL6;RPL7;ACTG1;RPS15;RPS4X;RPS14;RPL7A;RPS17;RPS18;TMSB4X;PSAP;RPLP2;RPL38;RPS2;RPS11;RPS27A;B2M;RPL19;CD74;RPS9;RPS7;RPS8;RPS5;RPL13A;H2-AA;EEF1A1;EEF1G;RPS29;RPS3A1;FAU;GAPDH;RPS23
Phosgene 6371 mouse GSE2565 sample 3617	42/276	1.14558e-45	2.96542e-44	0	0	22.7125	2350.3	RPL4;RPL3;RPLP1;RPL12;RPLP0;RPL11;HP;RPL36A;RPL6;ACTG1;RPS15;RPS14;RPL7A;RPS17;FTL1;RPS18;FTH1;UBC;PSAP;RPLP2;RPL13;RPL38;RPS2;RPS11;RPS27A;RPS12;WFDC21;RPL41;GPX1;RPS7;RPS8;RPS5;RPSA;MT2;RPL23A;EEF1G;RPL37A;LCN2;FAU;PTMA;GAPDH;RPS24
levofloxacin 149096 human GSE9166 sample 2628	39/217	2.69795e-45	6.78984e-44	0	0	26.8244	2752.82	RPL5;ORM1;HSP90AB1;HP;ORM2;RPS15;RPS4X;HPX;RPL7A;TMSB4X;RPS3;RPL14;RPL38;GC;B2M;RPL17;RPL19;FGA;RPL41;GPX1;RPS7;RPS8;AHSG;RPS6;FGG;APOA2;RPL13A;APOA1;RPSA;EEF1A1;RPL37A;LCN2;MYH9;SAA2;RPL26;GAPDH;CFB;RPS24;RPS23
rosiglitazone DB00412 rat GSE21329 sample 2845	47/413	3.29282e-45	8.06297e-44	0	0	16.9853	1739.71	RPL4;RPL5;ORM1;RPL3;HSP90AB1;RPL12;RPLP0;HP;RPL8;RPL6;RPL7;ACTG1;HSP90B1;C3;RPS4X;RPS14;HPX;RPL7A;RPS17;UBB;RPS18;UBC;RPS2;RPS11;RPS27A;RPL17;RPS12;FGB;HSPA8;FGA;RPS9;RPS7;RPS8;RPS5;RPS6;FGG;RPL23A;EEF2;EEF1A1;RPS29;LCN2;RPL26;PABPC1;RPS21;CFB;RPS24;RPS23
amoxicillin DB01060 rat GSE2354 sample 2678	36/169	1.28723e-44	3.06902e-43	0	0	31.7937	3213.11	RPL4;RPL5;RPL3;RPL32;RPLP1;RPL12;RPLP0;RPL11;ACTB;RPL7;ACTG1;RPS15;RPS4X;RPS14;RPL7A;RPS17;UBB;FTH1;TMSB4X;UBC;RPS3;RPS2;RPL17;RPS12;CD74;RPL41;RPS7;RPS5;RPS6;RPL13A;RPL23A;EEF1A1;RPS29;FAU;RPS21;RPS23
Aplidin 56928089 human GSE5681 sample 2598	39/230	3.055e-44	7.097e-43	0	0	25.3082	2535.81	RPL4;RPL3;RPL32;RPL12;RPLP0;RPL11;RPL36A;RPL8;ACTG1;RPS15;RPS4X;RPS14;RPL7A;RPS17;UBB;RPS18;UBC;RPL36;RPLP2;RPL13;RPS2;RPS11;RPL17;RPS12;RPL19;RPS9;RPS7;RPS6;RPL13A;RPSA;RPL23A;EEF1G;RPS29;RPL37A;RPL26;FAU;GAPDH;TPT1;RPS23
BPDE 41322 human GSE19510 sample 3377	43/326	5.21788e-44	1.18185e-42	0	0	19.6868	1962.02	IFITM3;RPL32;RPLP1;RPL12;RPLP0;RPL11;RPL36A;RPL8;RPS15;RPS4X;RPS17;RPS18;FTH1;PSAP;RPL36;RPS3;RPL14;RPLP2;RPL13;RPL38;RPS2;RPS11;B2M;RPL17;RPS12;RPL19;RPS9;RPL41;GPX1;RPS5;RPS6;RPL13A;RPSA;RPL23A;EEF1G;RPS29;RPL37A;RPL26;FAU;RPS21;GAPDH;RPS24;RPS23
rosiglitazone DB00412 mouse GSE2431 sample 2808	38/218	1.45503e-43	3.21526e-42	0	0	26.0167	2566.19	RPL5;RPLP1;HP;ORM2;C3;SERPINA1A;SERPINA1B;SERPINA1C;RPL36;RPL13;APOE;RPS2;GC;RPS27A;RPL19;FGB;WFDC21;RPL41;AHSG;RPS5;RPS6;FGG;APOA1;MT2;MT1;EEF2;EEF1A1;FABP1;RPS3A1;ALB;RPS27RT;APOC1;SAA2;PABPC1;PTMA;RPS24;TPT1;RPS23
CYFLUTHRIN 104926 human GSE5023 sample 3572	44/364	2.34036e-43	5.0485e-42	0	0	18.0417	1770.98	RPL4;RPL5;RPL3;RPL32;RPLP1;RPL12;RPLP0;RPL11;RPL36A;RPL8;RPL6;RPS15;RPS4X;RPL7A;RPS17;UBB;FTH1;UBC;PSAP;RPS3;RPL14;RPLP2;RPL13;RPS27A;RPL17;RPS12;RPL19;CD74;RPS9;RPL41;RPS7;RPS8;RPS6;RPL13A;RPSA;RPL23A;EEF2;EEF1G;RPS29;MYH9;PABPC1;FAU;RPS24;RPS23
doxorubicin, EC50, 5 d 31703 human GSE6930 sample 3262	36/189	1.03459e-42	2.17986e-41	0	0	28.4293	2748.39	RPL5;RPL32;RPLP1;RPL12;RPLP0;RPL8;RPL7;RPS15;RPS4X;RPS17;UBB;RPS18;FTH1;TMSB4X;PSAP;RPS3;RPL14;RPL38;RPS2;RPS11;RPS27A;B2M;RPS12;RPL19;HSPA8;RPS5;RPL13A;RPSA;RPL23A;EEF1A1;RPS29;FAU;RPS21;RPS24;TPT1;RPS23
halothane 3562 rat GSE6433 sample 3652	43/350	1.22217e-42	2.51656e-41	0	0	18.3369	1769.66	RPL4;RPL5;RPL3;RPL12;RPL11;RPL8;RPS15;RPS4X;RPS14;RPS17;TTR;RPS18;FTH1;TMSB4X;UBC;RPL36;RPS3;RPL14;RPS2;RPS11;RPS27A;B2M;RPL17;RPS12;RPL19;HSPA8;RPS9;GPX1;RPS7;RPS8;RPS5;RPS6;RPL13A;RPSA;EEF1A1;EEF1G;RPS29;RPL26;FAU;RPS21;PTMA;TPT1;RPS23
sapphyrin PCI-2050 (2.5 &Icirc;&frac14;M) 9855235 human GSE6400 sample 3102	42/332	3.71379e-42	7.47709e-41	0	0	18.8815	1801.23	RPL4;RPL3;HSP90AB1;RPL32;RPLP1;RPL12;RPLP0;RPL11;RPL6;ACTB;RPL7;ACTG1;RPS15;RPS4X;FTH1;TMSB4X;RPS3;RPL14;RPLP2;RPL13;RPL38;RPS2;RPL17;RPL19;HSPA8;RPL41;RPS8;RPS5;RPS6;RPL13A;RPSA;RPL23A;EEF2;EEF1A1;EEF1G;RPS29;FAU;RPS21;GAPDH;RPS24;TPT1;RPS23
curcumin 969516 mouse GSE23639 sample 3442	31/116	9.132e-42	1.79861e-40	0	0	39.8868	3769.17	RPL5;RPL3;HSP90AB1;LYZ2;RPLP1;RPL12;RPL36A;RPL8;RPL7;RPS17;FTL1;UBB;TMSB4X;UBC;RPL36;RPS3;RPLP2;RPL13;RPL38;RPS2;RPL19;HSPA8;RPL41;MT2;EEF2;LARS2;RPS29;RPL37A;RPL26;FAU;RPS23
pioglitazone DB01132 rat GSE21329 sample 2842	42/349	3.21188e-41	6.19141e-40	0	0	17.9618	1674.74	IFITM3;RPL4;RPL5;RPL3;RPL12;RPLP0;RPL11;HP;RPL8;ACTB;ACTG1;HSP90B1;C3;RPS4X;HPX;RPL7A;RPS17;UBB;RPS18;UBC;RPS2;RPL17;RPS12;FGB;HSPA8;FGA;RPS9;RPL41;RPS8;AHSG;RPS5;FGG;APOA2;EEF2;EEF1A1;RPS29;APOC1;PABPC1;FAU;CFB;RPS24;RPS23
estradiol 5757 mouse GSE2889 sample 3608	34/169	3.53496e-41	6.67224e-40	0	0	30.0274	2796.85	RPL4;H2-T23;H2-K1;RPL11;HBA-A2;RPL8;RPL6;ACTB;RPL7;RPS15;RPS4X;RPS14;RPL7A;RPS17;FTH1;TMSB4X;RPS3;RPL38;APOE;RPS2;RPL19;RPS5;RPSA;RPL23A;EEF2;EEF1A1;RPS29;RPL26;FAU;RPS21;PTMA;S100A8;RPS24;TPT1
etanercept DB00005 human GSE41663 sample 2602	39/276	5.49206e-41	1.01547e-39	0	0	21.0902	1955.12	RPL4;RPL3;RPL32;RPLP0;RPL36A;ACTB;ACTG1;RPS15;C3;RPS4X;RPL7A;UBB;RPS18;FTH1;TMSB4X;UBC;RPL36;RPL14;RPL38;RPS11;RPL17;RPS12;RPL19;CD74;RPL41;RPS7;RPS8;RPS6;RPL13A;RPSA;RPL23A;EEF2;EEF1A1;EEF1G;RPS29;RPL37A;S100A8;TPT1;RPS23
Vincristine 5978 human GSE7556 sample 3092	37/233	8.4546e-41	1.53197e-39	0	0	23.7012	2186.94	IFITM3;RPL3;RPL32;RPL12;RPLP0;RPL36A;RPL8;ACTB;ACTG1;RPS15;RPL7A;RPS18;FTH1;TMSB4X;RPL36;RPS3;RPL14;RPL13;RPS11;B2M;RPL17;HSPA8;RPS9;RPL41;GPX1;RPS5;RPS6;RPL13A;RPSA;EEF2;MYH9;PABPC1;FAU;RPS21;GAPDH;TPT1;RPS23
lung cancer DB00928 human GSE29077 sample 2536	39/280	9.85534e-41	1.75077e-39	0	0	20.7889	1915.03	RPL4;RPL3;RPL32;RPLP1;RPL12;RPLP0;RPL36A;RPL8;RPL6;ACTG1;RPS4X;RPL7A;RPS17;UBB;RPS18;FTH1;UBC;RPL36;RPS3;RPL13;RPS2;RPS11;RPS12;RPL19;RPL41;RPS7;RPS5;RPS6;RPL13A;RPSA;RPL23A;EEF2;CCNB1IP1;RPS29;RPL26;FAU;RPS24;TPT1;RPS23
hydrocortisone DB00741 human GSE7890 sample 2751	40/305	1.00515e-40	1.75128e-39	0	0	19.5743	1802.76	IFITM3;RPL4;RPL5;RPL3;HSP90AB1;RPL32;RPL12;RPLP0;RPL11;RPL36A;RPL8;RPL6;RPS15;C3;RPS4X;RPL7A;RPS17;RPS18;RPL36;RPS3;RPL14;RPL13;RPS2;RPS11;RPL17;RPL19;RPS9;GPX1;RPS7;RPS5;RPS6;RPL13A;RPSA;RPL23A;RPS29;SAA2;RPL26;FAU;RPS21;PTMA
morphine 5288826 mouse GSE7762 sample 3493	37/237	1.64337e-40	2.80923e-39	0	0	23.3012	2134.55	RPL4;RPL5;RPL3;RPL32;RPLP1;RPL11;RPL36A;RPL6;RPL7;ACTG1;RPS14;TTR;FTH1;UBC;RPL14;RPL13;RPL38;RPS2;RPS11;RPS27A;RPS7;RPS8;RPS5;RPL13A;MT2;RPL23A;MT1;EEF1A1;RPS29;RPS3A1;RPS27RT;RPL37A;RPL26;FAU;RPS21;RPS24;RPS23
cytarabine, EC50, 5 d 6253 human GSE6930 sample 3375	31/132	8.30246e-40	1.39297e-38	0	0	35.052	3154.22	RPL5;RPL32;RPLP1;RPL12;RPLP0;ACTB;ACTG1;RPS4X;RPS17;UBB;RPS18;FTH1;TMSB4X;PSAP;RPL14;RPL38;RPS2;RPS27A;RPL17;RPS12;RPL41;RPSA;RPL23A;EEF1A1;RPS29;RPL37A;FAU;RPS21;RPS24;TPT1;RPS23
Rosiglitazone effect on PRDM16-deficient inguinal white adipose tissue 77999 mouse GSE35011 sample 3099	38/271	8.9451e-40	1.4735e-38	0	0	20.9286	1881.74	IFITM3;RPL4;RPL3;HSP90AB1;RPL11;RPL36A;RPL8;RPL6;RPL7;ACTG1;HSP90B1;RPS14;RPS17;TMSB4X;RPS3;RPL14;RPL38;RPS2;RPS11;RPS27A;RPS12;RPL19;HSPA8;RPS9;RPS7;RPS8;RPS5;RPL13A;RPSA;EEF2;EEF1G;RPS29;RPS3A1;RPS27RT;RPL37A;RPS21;PTMA;RPS24
coenzyme Q10 5281915 mouse GSE15129 sample 3458	41/349	9.22627e-40	1.49268e-38	0	0	17.5341	1575.99	RPL4;RPL5;H2-T23;HSP90AB1;RPL32;LYZ2;RPL12;RPLP0;RPL11;RPL36A;RPL8;RPL6;ACTB;RPL7;ACTG1;HSP90B1;RPS4X;RPL7A;RPS17;FTL1;UBC;PSAP;RPL36;RPL14;RPLP2;RPL13;APOE;RPS2;RPS11;B2M;RPS12;CD74;RPS8;RPS5;RPL23A;H2-AA;RPS3A1;RPL26;PABPC1;FAU;GAPDH
phenytoin DB00252 rat GSE2880 sample 3291	35/207	1.45525e-39	2.31308e-38	0	0	25.2361	2256.76	RPL4;RPL5;RPL32;RPLP1;RPL12;RPLP0;RPL36A;RPL6;RPL7;RPS15;RPS4X;RPS14;RPL7A;RPS17;TTR;RPS18;RPS3;RPL38;RPS11;RPS27A;RPL17;RPS12;RPL19;RPS9;RPL41;RPS7;RPS8;RPS5;RPS6;RPL13A;RPSA;RPL23A;EEF1G;RPL26;RPS21
azacitidine DB00928 human GSE29077 sample 2544	35/208	1.74119e-39	2.71986e-38	0	0	25.1148	2241.4	RPL4;RPL3;RPL32;RPLP1;RPL12;RPLP0;RPL36A;RPL8;RPL6;ACTG1;RPS4X;RPL7A;RPS18;TMSB4X;UBC;RPL36;RPS3;RPLP2;RPL13;RPS2;RPS27A;RPS12;RPL19;RPL41;RPS6;RPL13A;RPSA;RPL23A;EEF2;EEF1A1;EEF1G;RPS29;FAU;TPT1;RPS23
Chlorpyrifos 2730 human GSE5023 sample 3571	41/359	3.01166e-39	4.62469e-38	0	0	17.0457	1511.92	RPL4;RPL5;RPL3;HSP90AB1;RPL32;RPLP1;RPL12;RPLP0;RPL11;RPL36A;RPL8;RPL6;RPS15;RPS4X;RPL7A;RPS17;RPS18;FTH1;UBC;PSAP;RPS3;RPL14;RPL13;RPS2;RPL17;RPS12;RPL19;RPL41;RPS7;RPS8;RPS6;RPL13A;RPSA;RPL23A;EEF1G;RPS29;RPL37A;MYH9;FAU;RPS24;RPS23
lung cancer DB00928 human GSE29077 sample 2534	37/256	3.28241e-39	4.95644e-38	0	0	21.5718	1911.53	RPL4;RPL3;RPL32;RPL12;RPLP0;RPL36A;RPL8;RPL6;RPS15;RPS4X;RPL7A;RPS17;UBB;RPS18;FTH1;RPL36;RPS3;RPL13;RPS2;RPS11;RPL17;RPL19;HSPA8;RPL41;RPS7;RPS5;RPS6;RPL13A;RPSA;RPL23A;EEF2;RPS29;APOC1;RPS21;PTMA;GAPDH;RPS24
ubiquinol 9962735 mouse GSE15129 sample 3451	35/219	1.1777e-38	1.74918e-37	0	0	23.8533	2083.22	RPL4;HSP90AB1;RPL32;RPLP1;RPL7;HSP90B1;RPS15;RPS4X;RPS14;RPL7A;RPS17;TTR;FTH1;TMSB4X;RPL14;RPLP2;RPL13;RPL38;RPS11;RPL19;HSPA8;RPL41;RPS5;RPL13A;MT2;RPL23A;RPS3A1;RPS27RT;RPL37A;RPL26;FAU;RPS21;PTMA;RPS24;RPS23
diclofenac DB00586 human GSE28185 sample 3058	35/221	1.64796e-38	2.40814e-37	0	0	23.6375	2056.43	RPL4;RPL5;RPL32;RPLP1;RPL12;RPLP0;RPL11;RPL36A;RPL8;RPL6;RPS4X;RPS17;RPS18;FTH1;PSAP;RPL36;RPS3;RPLP2;RPL13;RPS11;RPS27A;B2M;HSPA8;RPS9;GPX1;RPS7;RPS6;RPSA;EEF1G;RPS29;RPL26;RPS21;RPS24;TPT1;RPS23
Phosgene 6371 mouse GSE2565 sample 3616	38/294	2.21536e-38	3.18589e-37	0	0	19.2913	1672.61	RPL3;RPLP1;RPL12;RPLP0;RPL11;HP;TRF;RPL8;RPL6;ACTG1;RPS17;FTL1;FTH1;PSAP;RPL36;RPL14;RPLP2;RPL38;RPS2;RPS27A;RPS12;RPL19;WFDC21;RPL41;GPX1;RPS8;RPL13A;RPSA;MT2;MT1;EEF1G;LCN2;RPL26;FAU;IFI27L2A;S100A9;GAPDH;S100A8
troglitazone DB00197 rat GSE21329 sample 2833	42/408	2.54665e-38	3.6051e-37	0	0	15.3644	1329.99	RPL4;RPL5;RPL3;HSP90AB1;RPL32;RPLP1;RPL12;RPLP0;RPL8;RPL6;ACTB;RPL7;ACTG1;C3;RPS4X;RPS14;RPL7A;UBB;RPS18;UBC;RPS2;RPS27A;RPL17;RPS12;FGB;HSPA8;FGA;RPS9;RPS7;RPS8;RPS5;RPS6;APOA2;EEF2;EEF1A1;EEF1G;RPS29;PABPC1;FAU;GAPDH;RPS24;RPS23
CADMIUM 23973 human GSE6907 sample 3530	34/205	4.09168e-38	5.70317e-37	0	0	24.7543	2131.08	IFITM3;RPL5;ORM1;HSP90AB1;RPL32;RPL12;RPL36A;RPL8;RPL6;ACTB;RPS15;C3;RPS4X;RPL7A;RPS17;RPS18;RPL36;RPL14;RPL13;RPL19;RPS9;RPL41;RPS7;RPS5;RPL13A;EEF2;EEF1A1;RPL37A;PABPC1;RPS21;HAMP;GAPDH;RPS24;RPS23
Bisphenol A 6623 mouse GSE4650 sample 3573	33/185	4.30418e-38	5.90846e-37	0	0	26.6236	2290.66	RPL4;RPL5;RPL3;RPLP1;RPLP0;ACTB;ACTG1;UBC;RPS3;RPLP2;RPL13;RPL38;RPS2;RPL19;HSPA8;RPL41;RPS7;RPS5;RPL13A;RPSA;MT2;RPL23A;MT1;EEF2;EEF1A1;RPS29;RPS3A1;RPS27RT;RPL37A;RPL26;FAU;TPT1;RPS23
ubiquinol 9962735 human GSE21351 sample 3448	37/281	1.18097e-37	1.59695e-36	0	0	19.6526	1671.05	IFITM3;RPL32;RPLP1;RPL12;RPL11;RPL36A;RPS15;RPS14;RPS17;UBB;RPS18;TMSB4X;RPL36;RPL14;RPLP2;RPL38;RPS11;RPS27A;B2M;RPS12;RPL19;HSPA8;CD74;RPL41;RPS7;RPS8;RPL23A;BST2;RPS29;RPL37A;RPL26;FAU;S100A9;RPS21;S100A8;RPS24;RPS23
deferasirox DB01609 human GSE11670 sample 2571	34/216	2.67985e-37	3.57051e-36	0	0	23.4936	1978.4	RPL4;RPL3;RPL32;RPLP1;RPL12;RPLP0;RPL11;RPL36A;RPL8;ACTG1;RPS4X;RPS17;UBB;RPS18;TMSB4X;RPS3;RPL14;RPS2;RPL17;RPS12;RPS9;RPL41;RPS7;RPS5;RPL13A;RPSA;RPL23A;EEF2;CCNB1IP1;EEF1A1;EEF1G;PABPC1;GAPDH;TPT1
ZINC ACETATE 11192 human GSE2964 sample 3590	34/217	3.1622e-37	4.15211e-36	0	0	23.3854	1965.41	RPL4;RPL3;HSP90AB1;RPLP0;RPL36A;RPL8;ACTB;RPL7;ACTG1;HSP90B1;RPS4X;UBB;TMSB4X;UBC;RPS3;RPL13;RPS2;RPL17;HSPA8;RPL41;RPS7;RPS8;RPS5;RPS6;RPSA;RPL23A;EEF2;EEF1A1;EEF1G;RPS29;RPL37A;GAPDH;TPT1;RPS23
HYPOCHLOROUS ACID 24341 human GSE11630 sample 3198	33/196	3.28644e-37	4.2536e-36	0	0	25.1295	2111.02	RPL5;RPL32;RPLP1;RPL11;RPL36A;ACTB;ACTG1;RPS15;RPS14;RPL7A;RPS18;TMSB4X;UBC;RPS3;RPLP2;RPL13;B2M;RPL17;RPS12;RPL19;HSPA8;RPS9;RPL41;RPS6;RPL23A;EEF1A1;RPS29;SAA2;S100A9;GAPDH;S100A8;TPT1;RPS23
phenytoin 1775 rat GSE2880 sample 2670	34/218	3.72819e-37	4.75738e-36	0	0	23.2781	1952.56	RPL4;RPL5;RPL32;RPLP1;RPL12;RPL36A;RPL6;RPL7;RPS15;RPS4X;RPS14;RPS17;TTR;RPS18;TMSB4X;RPS3;RPL38;RPS11;RPS27A;RPL17;RPS12;RPL19;RPS9;RPS8;RPS5;RPS6;RPL13A;RPL23A;EEF1A1;RPS29;RPL26;RPS21;TPT1;RPS23
Calcitonin 16132288 mouse GSE60761 sample 3446	34/220	5.16916e-37	6.50453e-36	0	0	23.0665	1927.27	RPL4;H2-T23;LYZ2;RPLP1;RPL12;H2-K1;RPLP0;RPL36A;RPL7;C3;RPS14;RPL7A;FTL1;FTH1;PSAP;RPLP2;RPL38;APOE;RPS2;RPS12;RPL19;CD74;RPL41;RPS5;RPL13A;H2-AA;EEF1A1;RPS3A1;RPL37A;RPL26;FAU;GAPDH;TPT1;RPS23
Hydrogen Peroxide 784 mouse GSE3078 sample 3599	33/199	5.59544e-37	6.94447e-36	0	0	24.7506	2066.03	IFITM3;RPL4;RPL3;RPLP1;RPLP0;RPL8;RPL6;RPS15;RPL7A;RPS17;FTH1;UBC;RPS3;RPLP2;RPL38;RPS2;RPS11;RPS27A;RPS12;RPL41;GPX1;RPS5;RPSA;RPL23A;EEF2;EEF1A1;RPS27RT;RPL37A;RPL26;FAU;GAPDH;RPS24;RPS23
EPZ004777 56962336 human GSE29828 sample 2650	34/224	9.83968e-37	1.2047e-35	0	0	22.6546	1878.27	RPL4;RPL5;RPL3;RPL32;RPLP1;RPL12;RPLP0;RPL11;RPL36A;RPL6;RPS4X;RPL7A;RPS17;FTH1;PSAP;RPL36;RPS3;RPL14;RPL13;B2M;RPL17;RPS12;RPL19;CD74;RPS9;RPS8;RPSA;EEF2;EEF1G;RPS29;RPL26;FAU;RPS21;TPT1
bexarotene 82146 rat GSE3952 sample 3564	38/325	1.10613e-36	1.33621e-35	0	0	17.4512	1444.82	IFITM3;RPL4;RPL3;HSP90AB1;RPL12;RPLP0;RPL11;RPL8;RPL6;ACTB;ACTG1;RPS15;RPS14;RPL7A;FTL1;RPS18;FTH1;PSAP;RPS3;RPL14;APOE;RPS2;HSPA8;CD74;RPS9;GPX1;RPS7;RPS5;RPSA;EEF2;EEF1G;LCN2;SAA2;FAU;PTMA;GAPDH;CFB;RPS24
Argyrin A 24978550 human GSE8565 sample 3052	33/210	3.65532e-36	4.35752e-35	0	0	23.4542	1913.79	RPL4;RPL5;RPL3;RPL32;RPLP1;RPL12;RPLP0;RPL11;RPL36A;RPL6;HSP90B1;RPS15;RPS4X;RPL7A;RPS3;RPL14;RPLP2;RPS2;RPS11;RPL17;RPS12;RPL19;RPS9;RPS5;RPS6;RPL13A;RPL23A;EEF2;EEF1G;RPS29;RPL26;GAPDH;RPS23
lubiprostone DB01046 mouse GSE18327 sample 2778	34/253	7.35512e-35	8.6542e-34	0	0	20.0578	1576.45	RPL4;H2-T23;RPL3;RPL32;RPLP1;RPLP0;RPL36A;RPS14;RPS18;RPL36;RPL14;RPLP2;RPL13;RPL38;RPS11;RPS27A;RPS12;RPL41;RPS7;RPS8;RPL13A;APOA1;MT2;EEF2;EEF1A1;FABP1;RPS29;RPS3A1;RPS27RT;RPL37A;LCN2;SAA1;RPS24;RPS23
PRISTANE 15979 mouse GSE17297 sample 3226	37/333	7.3651e-35	8.55484e-34	0	0	16.5837	1303.38	IFITM3;H2-T23;RPL3;LYZ2;RPLP0;HP;RPL36A;RPL6;ACTB;RPL7;ACTG1;C3;RPS14;TMSB4X;PSAP;RPL38;RPS11;RPS27A;RPS12;WFDC21;GPX1;RPS7;RPS8;RPS5;RPSA;MT2;MT1;BST2;RPS29;RPS3A1;RPS27RT;LCN2;PABPC1;S100A9;PTMA;S100A8;RPS23
candesartan DB00796 rat GSE2739 sample 2687	33/231	9.8629e-35	1.13111e-33	0	0	21.322	1669.55	IFITM3;RPL4;RPL5;RPL3;RPL11;RPS4X;RPS14;RPS17;RPS18;TMSB4X;RPL36;RPS3;RPLP2;RPS11;RPS27A;B2M;RPL17;RPS12;RPL19;RPS9;RPL41;RPS7;RPS8;RPS6;RPSA;EEF1A1;EEF1G;RPS29;RPL26;RPS21;CFB;TPT1;RPS23
ANTIMONY 5354495 human GSE6907 sample 3532	28/134	2.17448e-34	2.4626e-33	0	0	31.1873	2417.37	RPL32;RPLP1;RPL12;RPL11;RPL36A;RPS15;RPS4X;RPL7A;RPS17;UBB;RPS18;RPL36;RPL14;RPS3;RPLP2;RPL13;RPL19;RPS9;RPL41;RPS5;RPL13A;RPL23A;RPS29;RPL37A;RPS21;HAMP;RPS24;RPS23
NICKEL 935 human GSE6907 sample 3531	35/288	2.5132e-34	2.81106e-33	0	0	18.1385	1403.31	RPL4;RPL5;HSP90AB1;RPL12;RPLP0;RPL11;RPL36A;RPL8;RPL6;ACTG1;RPS15;RPS4X;RPS17;UBB;FTH1;RPS3;RPL14;RPL13;RPS27A;B2M;RPL17;HSPA8;RPS9;RPS7;RPS8;RPS5;RPS6;RPL13A;EEF2;CCNB1IP1;EEF1A1;RPS29;GAPDH;RPS24;RPS23
alitretinoin DB00523 rat GSE3952 sample 2674	31/193	2.87044e-34	3.17149e-33	0	0	23.9734	1851.55	RPL5;LYZ2;RPL12;RPLP0;RPL6;ACTB;ACTG1;RPS15;RPL7A;FTL1;RPS18;TMSB4X;PSAP;APOE;RPS2;RPS11;B2M;RPS12;RPL19;CD74;RPS9;RPSA;EEF2;EEF1A1;LCN2;MYH9;RPL26;S100A9;RPS21;GAPDH;TPT1
Bisphenol A 6623 mouse GSE4650 sample 3574	31/202	1.27042e-33	1.38675e-32	0	0	22.9053	1734.98	RPL4;RPL5;RPL3;RPLP1;RPLP0;RPL36A;RPL8;RPL6;ACTB;ACTG1;FTL1;RPS18;UBC;RPLP2;RPL13;RPS2;RPS27A;RPL19;RPL41;RPS7;RPS5;RPL13A;MT2;RPL23A;MT1;EEF2;EEF1A1;RPS3A1;RPL26;TPT1;RPS23
deferasirox DB01609 human GSE11670 sample 2572	32/226	1.52595e-33	1.64585e-32	0	0	21.1333	1596.89	RPL3;RPL32;RPLP1;RPL12;RPLP0;RPL36A;ACTG1;HSP90B1;RPS4X;RPS18;FTH1;UBC;PSAP;RPS3;RPS2;RPS11;RPS12;RPS9;RPS5;RPS6;RPL13A;RPSA;RPL23A;EEF2;CCNB1IP1;EEF1A1;EEF1G;RPS29;PABPC1;GAPDH;TPT1;RPS23
Chromium(III) nicotinate 56843898 mouse GSE4420 sample 2590	34/277	1.75699e-33	1.87274e-32	0	0	18.32	1381.72	IFITM3;RPL3;LYZ2;RPLP1;H2-K1;HP;RPL8;ACTB;RPL7;ACTG1;C3;RPS4X;TMSB4X;UBC;PSAP;RPL14;RPL38;APOE;RPS2;CD74;WFDC21;RPS8;RPSA;MT2;RPL23A;MT1;H2-AA;EEF1A1;RPS29;RPL37A;MYH9;RPS21;S100A8;RPS23
Hydrogen Peroxide 784 mouse GSE3078 sample 3598	32/235	5.58362e-33	5.88228e-32	0	0	20.3239	1509.36	RPL3;HSP90AB1;RPLP1;RPLP0;RPL8;ACTB;RPS15;RPS14;RPS17;FTL1;RPS18;FTH1;UBC;RPS3;RPLP2;RPL38;RPS2;RPS11;RPL19;RPL41;RPS5;RPSA;RPL23A;MT1;EEF2;RPS3A1;RPS27RT;RPL37A;RPL26;FAU;GAPDH;RPS23
PRISTANE 15979 mouse GSE17297 sample 3229	34/291	9.74662e-33	1.01499e-31	0	0	17.4386	1285.37	IFITM3;H2-T23;RPL32;LYZ2;H2-K1;RPLP0;HP;RPL36A;RPL8;ACTG1;C3;FTL1;TMSB4X;PSAP;RPL13;APOE;RPS2;RPS27A;CD74;GPX1;RPS7;RPS8;RPS5;RPL13A;MT2;H2-AA;BST2;RPS3A1;LCN2;FAU;S100A9;PTMA;S100A8;H2-D1
resveratrol DB02709 mouse GSE11291 sample 3505	32/241	1.28622e-32	1.32422e-31	0	0	19.8179	1455.25	RPL4;RPL3;RPL12;RPLP0;HBA-A2;RPL8;RPL6;RPL7;RPS15;RPS14;TTR;TMSB4X;UBC;RPS3;RPL14;RPL13;RPL38;RPS2;RPS27A;RPL17;HSPA8;RPS9;RPS7;RPS5;RPL13A;RPSA;MT2;EEF1A1;RPS29;RPS3A1;RPL26;RPS24
3H-1,2-Dithiole-3-thione 68296 rat GSE3173 sample 3593	29/174	1.50371e-32	1.53075e-31	0	0	24.8756	1822.76	RPL5;ORM1;RPLP0;RPL8;RPL6;RPS4X;RPL7A;RPS17;FTL1;TTR;RPS18;FTH1;RPS3;RPLP2;APOE;RPS2;RPS27A;RPL17;RPS12;RPL19;RPS9;RPS8;RPS6;APOA2;RPSA;EEF2;ALB;APOC1;GAPDH
nitric oxide 145068 human GSE13887 sample 3181	28/158	3.16764e-32	3.18875e-31	0	0	26.45	1918.41	RPL4;RPL32;RPS4X;RPS14;RPS17;RPS18;FTH1;UBC;RPL13;RPL38;RPS2;RPS11;RPL17;RPS12;RPS9;RPL41;RPS5;RPS6;EEF2;EEF1A1;EEF1G;RPS29;RPL37A;MYH9;PABPC1;GAPDH;TPT1;RPS23
trovafloxacin 62959 human GSE9166 sample 2629	27/141	4.66045e-32	4.63997e-31	0	0	28.5805	2061.9	IFITM3;ORM1;RPL32;RPLP1;HP;ORM2;C3;HPX;GC;B2M;RPL19;FGB;FGA;RPL41;FGG;APOA2;APOA1;RPL23A;FABP1;RPS29;RPL37A;APOC1;SAA2;RPL26;FAU;CFB;RPS24
quercetin DB04216 mouse GSE38141 sample 3435	33/280	6.8492e-32	6.74497e-31	0	0	17.5906	1262.28	RPL32;LYZ2;H2-K1;RPLP0;ACTG1;HSP90B1;SERPINA1A;SERPINA1B;TTR;FTH1;UBC;RPL36;RPL38;RPS11;RPS27A;B2M;RPL17;HSPA8;CD74;AMBP;AHSG;RPS5;FGG;SERPINA3K;RPL13A;EEF2;EEF1A1;FABP1;APOC1;FAU;HAMP;GAPDH;RPS24
azacitidine DB00928 human GSE29077 sample 2542	30/208	1.08597e-31	1.05794e-30	0	0	21.527	1534.82	RPL4;RPL3;HSP90AB1;RPL32;RPLP1;RPL12;RPL36A;RPL8;RPL6;ACTB;ACTG1;RPS15;RPS14;RPS18;RPL36;RPS3;RPS2;HSPA8;RPL41;RPS5;RPSA;RPL23A;EEF1A1;EEF1G;RPS29;PABPC1;FAU;RPS24;TPT1;RPS23
resveratrol DB02709 mouse GSE11291 sample 3504	34/314	1.34632e-31	1.29762e-30	0	0	16.1612	1148.79	IFITM3;RPLP1;RPL12;RPL36A;HBA-A2;RPL6;RPL7;RPS15;RPS14;RPS17;RPS18;TMSB4X;RPL14;RPL13;RPL38;APOE;RPS2;RPS11;RPS27A;B2M;RPS12;RPS7;RPS8;RPS5;RPL13A;RPSA;MT2;RPS29;RPS3A1;RPS27RT;RPL26;RPS21;GAPDH;RPS24
doxycycline DB00254 mouse GSE29848 sample 3209	32/267	3.72916e-31	3.55644e-30	0	0	17.8881	1253.31	IFITM3;RPL3;RPL32;RPLP1;RPLP0;RPL11;RPL36A;RPL8;ACTB;RPL7;RPS15;RPS14;RPL7A;FTH1;TMSB4X;RPL14;RPLP2;RPL13;RPS2;RPS11;RPL17;RPL19;RPS5;RPL13A;RPSA;RPL23A;RPS29;RPS27RT;RPL26;FAU;RPS24;RPS23
doxycycline DB00254 human GSE2624 sample 3074	28/175	6.59191e-31	6.22111e-30	0	0	23.8806	1659.57	IFITM3;RPL3;RPLP1;RPL12;RPLP0;RPL8;RPS15;RPS4X;RPS14;RPS18;FTH1;PSAP;RPS3;RPL14;RPL13;RPL38;RPS2;RPL17;RPS9;RPS5;RPS6;RPL13A;RPL23A;BST2;EEF1G;RPS21;PTMA;GAPDH
troglitazone DB00197 rat GSE21329 sample 2834	29/198	7.7316e-31	7.22148e-30	0	0	21.8604	1515.69	RPL5;RPL3;RPL32;LYZ2;RPLP1;RPLP0;RPL11;RPL36A;ACTB;ACTG1;FTL1;UBB;TMSB4X;UBC;RPS3;RPS2;RPS27A;B2M;RPS12;RPL41;GPX1;RPS5;RPS6;EEF1A1;EEF1G;PTMA;GAPDH;TPT1;RPS23
genistein 5280961 mouse GSE2889 sample 3605	33/307	1.49464e-30	1.38178e-29	0	0	16.0436	1101.8	IFITM3;RPL4;H2-K1;RPL36A;HBA-A2;RPL8;ACTB;RPL7;ACTG1;HSP90B1;RPS15;C3;FTL1;FTH1;PSAP;RPLP2;APOE;RPS2;B2M;CD74;RPL41;GPX1;RPL23A;EEF2;H2-AA;EEF1G;RPS29;MYH9;IFI27L2A;S100A9;S100A8;H2-D1;RPS23
resveratrol DB02709 mouse GSE7111 sample 3496	34/337	1.51554e-30	1.38695e-29	0	0	15.0582	1033.93	IFITM3;RPL3;HSP90AB1;RPL32;RPL11;RPL8;RPL6;ACTG1;RPS15;RPL7A;TMSB4X;PSAP;RPL36;RPS3;RPL14;RPLP2;RPL13;RPS11;RPS27A;B2M;RPL19;HSPA8;GPX1;RPS8;RPS5;RPL13A;RPSA;EEF1G;LCN2;RPL26;RPS21;PTMA;S100A8;RPS24
quercetin DB04216 mouse GSE38136 sample 3438	31/254	1.99205e-30	1.80479e-29	0	0	18.216	1245.76	RPL32;HP;RPL36A;HBA-A2;ACTG1;SERPINA1A;RPS14;SERPINA1C;TTR;FTH1;RPL13;RPL38;RPS11;GC;RPS27A;B2M;FGA;WFDC21;APOA2;APOA1;MT2;MT1;FABP1;ALB;RPS27RT;RPL37A;APOC1;LCN2;SAA1;SAA2;HAMP
apratoxin A 6326668 human GSE2742 sample 3069	28/183	2.45705e-30	2.20404e-29	0	0	22.8366	1556.97	RPL3;HSP90AB1;RPLP1;RPLP0;RPL11;RPL36A;ACTB;RPL7A;RPS17;UBB;RPS18;FTH1;UBC;RPL14;RPL38;RPS11;RPS27A;RPL19;HSPA8;RPL41;RPS6;RPL13A;RPSA;EEF1A1;EEF1G;RPL37A;GAPDH;RPS24
estradiol 5757 mouse GSE2889 sample 3607	25/125	3.19872e-30	2.84121e-29	0	0	29.8507	2027.31	RPL5;RPL3;RPLP1;RPLP0;HBA-A2;RPL8;ACTB;RPS4X;RPS17;FTH1;PSAP;RPLP2;RPL38;RPS2;RPL19;RPL41;RPS5;RPSA;EEF2;EEF1A1;RPS29;FAU;PTMA;GAPDH;TPT1
decitabine DB01262 human GSE29077 sample 2538	31/263	5.99647e-30	5.27457e-29	0	0	17.5926	1183.75	RPL32;RPLP1;RPL12;RPLP0;RPL36A;RPL8;RPL6;ACTG1;RPS15;RPL7A;RPS17;UBB;RPS18;UBC;RPS3;RPLP2;RPS2;RPS11;RPS27A;HSPA8;RPL41;RPS7;RPL13A;RPSA;RPL23A;EEF2;APOC1;PABPC1;RPS24;TPT1;RPS23
Bisphenol A 6623 human GSE17624 sample 2656	29/212	6.05996e-30	5.27916e-29	0	0	20.4168	1373.56	RPL5;RPL3;RPL32;RPL12;RPLP0;RPL11;ACTB;ACTG1;RPS15;RPS17;RPS18;FTH1;TMSB4X;UBC;RPS3;RPS2;RPL41;RPS7;RPS6;RPSA;RPL23A;EEF2;EEF1G;RPS29;RPL37A;RPS21;PTMA;GAPDH;RPS23
curcumin 969516 human GSE10896 sample 3408	29/215	9.23676e-30	7.97e-29	0	0	20.1319	1345.91	RPL32;RPLP1;RPL12;RPLP0;RPL36A;RPL8;ACTB;HSP90B1;RPS15;C3;RPS17;UBB;RPS18;FTH1;UBC;RPS3;B2M;RPL17;RPS12;RPL41;RPS5;RPL13A;RPL23A;EEF1A1;EEF1G;FAU;GAPDH;TPT1;RPS23
decitabine DB01262 human GSE29077 sample 2546	30/243	1.34387e-29	1.14863e-28	0	0	18.4264	1224.98	RPL4;RPL32;RPLP1;RPL12;RPLP0;RPL36A;RPL8;RPL6;ACTG1;RPS15;RPS4X;RPL7A;RPS18;TMSB4X;UBC;RPLP2;RPL13;RPS2;RPS12;RPL19;RPL41;GPX1;RPS5;RPL23A;EEF2;EEF1G;RPS29;FAU;TPT1;RPS23
trovafloxacin 62959 human GSE9166 sample 2623	29/219	1.60402e-29	1.35817e-28	0	0	19.7642	1310.41	RPL4;ORM1;RPL3;RPL32;RPLP1;RPL8;RPL6;ACTB;ACTG1;RPS15;RPS14;TTR;RPL38;APOE;RPS11;RPS27A;RPL19;HSPA8;RPS9;RPS7;AMBP;AHSG;RPS5;APOA2;RPL13A;APOA1;RPL23A;FAU;TPT1
EPZ004777 56962336 human GSE29828 sample 2649	30/248	2.51026e-29	2.10583e-28	0	0	18.0549	1189	RPL4;RPL5;RPL3;RPL32;RPL12;RPL11;RPL36A;RPL6;RPS4X;RPL7A;PSAP;RPL36;RPL14;RPL13;RPS11;B2M;RPL17;RPS12;RPL19;CD74;RPS9;RPS7;RPS8;RPS5;RPSA;EEF2;CCNB1IP1;EEF1G;RPL26;FAU
quercetin DB04216 mouse GSE38136 sample 3437	37/472	2.84988e-29	2.3688e-28	0	0	11.7	769.012	RPL32;RPLP1;RPL11;HP;RPL36A;HBA-A2;RPL7;RPS15;C3;RPS14;RPL7A;SERPINA1B;RPL36;RPL13;RPL38;RPS2;RPS11;RPS27A;B2M;RPS12;RPL19;HSPA8;WFDC21;RPL41;RPS5;RPL13A;MT2;RPL23A;MT1;RPS29;RPS27RT;RPL37A;SAA1;SAA2;RPL26;RPS21;RPS24
imatinib DB00619 human GSE28698 sample 2524	29/225	3.59555e-29	2.96142e-28	0	0	19.2371	1259.94	RPL3;RPL32;RPL12;RPL11;RPL36A;RPL6;RPS15;RPS4X;RPS17;FTH1;TMSB4X;PSAP;RPS3;RPLP2;RPL13;RPS2;RPS11;B2M;RPS12;CD74;GPX1;RPS5;RPL13A;EEF1G;RPS29;RPL26;GAPDH;RPS24;TPT1
2,3,7,8-tetrachlorodibenzo-p-dioxin 10852289 human GSE24193 sample 3189	32/309	4.25478e-29	3.47282e-28	0	0	15.4567	1009.74	RPL4;RPL5;RPL3;HSP90AB1;RPL11;RPL8;RPL6;RPS15;RPS4X;RPL7A;UBB;RPS18;RPL36;RPS3;RPL14;RPL38;RPS11;RPL41;GPX1;RPS7;RPS8;RPS5;RPSA;EEF2;EEF1G;RPS29;RPL37A;PABPC1;FAU;S100A9;RPS21;RPS23
lapatinib DB01259 human GSE38376 sample 2586	32/309	4.25478e-29	3.44181e-28	0	0	15.4567	1009.74	RPL4;RPL5;RPL3;RPLP1;RPL12;RPLP0;RPL7;ACTG1;RPS14;RPS17;RPS18;UBC;PSAP;RPS3;RPLP2;RPS2;RPS11;B2M;RPL41;RPS5;RPS6;RPL13A;RPSA;RPL23A;EEF2;EEF1A1;EEF1G;RPL37A;RPL26;PABPC1;TPT1;RPS23
Bisphenol A 6623 human GSE17624 sample 2655	30/254	5.21734e-29	4.18311e-28	0	0	17.6284	1148.01	RPL4;RPL3;RPL32;RPLP1;RPL12;RPLP0;RPL11;RPL8;ACTB;ACTG1;RPS17;RPS18;FTH1;TMSB4X;UBC;PSAP;RPS3;RPS2;RPL41;RPS7;RPS6;RPL13A;RPSA;RPL23A;EEF1A1;EEF1G;RPL37A;GAPDH;TPT1;RPS23
coenzyme Q10 5281915 mouse GSE15129 sample 3454	31/283	6.0176e-29	4.78241e-28	0	0	16.3493	1062.39	RPL4;RPL5;RPL3;HSP90AB1;RPLP0;RPL11;RPL6;ACTB;ACTG1;HSP90B1;RPS15;RPS14;RPL7A;RPS17;TMSB4X;RPL36;RPLP2;APOE;RPS11;RPS27A;B2M;RPS12;RPS9;RPS5;EEF2;RPS29;RPS27RT;RPL26;GAPDH;TPT1;RPS23
chromium 23976 human GSE6907 sample 3534	32/330	3.50234e-28	2.75923e-27	0	0	14.4731	914.974	IFITM3;RPL4;RPL5;ORM1;HSP90AB1;RPL12;RPLP0;RPL11;RPL36A;ACTB;RPS15;RPS4X;RPL7A;RPS17;UBB;RPL36;RPS3;RPL14;RPLP2;RPL13;RPL19;RPS9;RPS5;CCNB1IP1;EEF1A1;PABPC1;FAU;RPS21;HAMP;GAPDH;RPS24;RPS23
Gefitinib DB00317 human GSE53180 sample 3474	26/173	5.58418e-28	4.36144e-27	0	0	22.4312	1407.61	IFITM3;RPL32;RPLP1;RPL12;RPL11;RPL36A;RPL8;RPS15;RPS17;RPS18;FTH1;RPL36;RPLP2;RPL38;RPS2;RPS11;B2M;RPS12;RPL41;GPX1;RPS8;RPSA;RPL37A;RPS21;GAPDH;RPS24
decitabine 451668 mouse GSE4768 sample 3103	29/251	9.19114e-28	7.11724e-27	0	0	17.2445	1073.54	IFITM3;RPL4;H2-T23;RPL3;RPLP1;H2-K1;RPLP0;RPL11;ACTB;ACTG1;RPS14;RPL7A;FTL1;FTH1;UBC;RPS2;B2M;RPS5;MT2;MT1;EEF1A1;BST2;RPS29;RPS3A1;RPL37A;RPL26;H2-D1;TPT1;RPS23
PLX4720 CID 24180719 human GSE50791 sample 2507	31/315	1.69501e-27	1.30142e-26	0	0	14.6885	905.428	RPL5;RPL3;RPLP0;RPL8;RPL6;RPL7;ACTG1;RPS4X;RPS14;RPL7A;RPS17;UBB;FTH1;RPS3;RPS2;RPS27A;RPL17;RPS12;HSPA8;RPS8;RPS5;RPS6;RPL13A;EEF2;EEF1A1;EEF1G;LCN2;RPL26;PABPC1;TPT1;RPS23
Hydrogen Peroxide 784 mouse GSE3078 sample 3597	27/204	1.70373e-27	1.29712e-26	0	0	19.7542	1217.59	RPL4;RPLP0;RPL36A;RPL6;ACTB;ACTG1;RPS15;RPS14;RPL7A;RPS17;FTH1;TMSB4X;RPS3;RPLP2;RPS2;RPL41;RPS5;RPSA;EEF2;EEF1G;RPL37A;RPL26;PABPC1;FAU;PTMA;GAPDH;RPS23
diethylstilbestrol DB00255 rat GSE4028 sample 2715	30/285	1.72387e-27	1.30152e-26	0	0	15.7109	968.189	RPL4;RPL5;RPL32;RPLP1;RPL12;RPLP0;RPL36A;RPL8;RPL6;HSP90B1;RPS15;RPL7A;FTL1;RPS18;RPS3;RPL14;RPS2;RPS11;RPL17;RPS12;GPX1;RPS7;RPS8;RPSA;EEF2;EEF1G;PABPC1;RPS21;TPT1;RPS23
cytarabine, EC50, 3 d 6253 human GSE6930 sample 3374	28/232	2.36506e-27	1.77086e-26	0	0	18.0134	1104.38	RPL4;RPL32;RPLP1;RPL12;RPLP0;RPL11;ACTB;ACTG1;RPS15;RPS4X;RPS17;RPS18;FTH1;TMSB4X;UBC;RPS2;B2M;RPL17;RPS12;RPL41;RPL23A;EEF2;EEF1A1;FAU;GAPDH;RPS24;TPT1;RPS23
CONCANAVALIN A 596316 mouse GSE17184 sample 3367	28/233	2.67422e-27	1.98593e-26	0	0	17.9361	1097.44	IFITM3;H2-T23;ORM1;H2-K1;HP;ORM2;ACTB;ACTG1;HSP90B1;C3;HPX;TMSB4X;B2M;FGB;HSPA8;FGA;WFDC21;AMBP;FGG;MT2;MT1;LCN2;SAA1;SAA2;S100A9;HAMP;S100A8;H2-D1
doxycycline DB00254 human GSE2624 sample 3077	27/209	3.33881e-27	2.45932e-26	0	0	19.2816	1175.49	IFITM3;RPL32;RPLP1;RPL12;RPL8;ACTB;ACTG1;RPS15;RPS4X;RPS17;RPS18;FTH1;RPS3;RPLP2;RPL38;RPS2;B2M;RPS9;RPL41;GPX1;RPS5;BST2;EEF1G;RPS29;FAU;GAPDH;CFB
etanercept DB00005 human GSE41663 sample 2603	29/265	4.52703e-27	3.30765e-26	0	0	16.3334	990.781	RPL4;RPL32;RPLP1;RPL12;RPLP0;RPL36A;ACTB;C3;RPS17;TMSB4X;RPL14;RPL38;RPS11;RPL17;RPL19;CD74;RPL41;RPS8;RPSA;RPL23A;EEF1A1;EEF1G;RPS29;RPL37A;APOC1;FAU;PTMA;TPT1;RPS23
quercetin 5280343 rat GSE7479 sample 3409	33/394	5.47073e-27	3.96519e-26	0	0	12.5009	755.937	RPL4;HSP90AB1;RPLP1;RPLP0;RPL11;RPL36A;RPL6;HSP90B1;RPS15;RPL7A;RPS17;TMSB4X;PSAP;RPS3;RPL38;RPS2;RPS27A;RPL19;RPS9;RPL41;RPS8;RPS6;RPL13A;RPL23A;EEF2;EEF1A1;EEF1G;FABP1;PABPC1;FAU;PTMA;GAPDH;TPT1
quercetin DB04216 mouse GSE38136 sample 3436	30/297	5.97031e-27	4.29294e-26	0	0	15.0761	910.342	RPL4;H2-T23;ORM1;RPL32;H2-K1;HP;RPL36A;HBA-A2;HPX;SERPINA1C;FTH1;TMSB4X;RPL38;RPS2;RPS11;RPS27A;B2M;FGA;WFDC21;RPS7;AMBP;APOA1;RPS29;RPL37A;SAA1;SAA2;HAMP;H2-D1;RPS24;TPT1
Lapatinib DB01259 human GSE16179 sample 2581	27/214	6.42851e-27	4.58601e-26	0	0	18.8311	1135.68	RPL3;RPLP1;RPL12;RPLP0;RPS4X;RPL7A;RPS17;UBB;RPS18;FTH1;UBC;PSAP;RPS2;RPS11;B2M;RPL17;RPL19;RPL41;RPL13A;RPL23A;EEF2;EEF1A1;EEF1G;RPL37A;PABPC1;RPS24;TPT1
ubiquinol 9962735 mouse GSE15129 sample 3457	31/333	9.43392e-27	6.67745e-26	0	0	13.8945	832.634	IFITM3;RPL4;RPL5;H2-T23;RPL3;H2-K1;RPL36A;HBA-A2;RPL8;ACTB;RPL7;HSP90B1;C3;RPS4X;TMSB4X;UBC;RPL13;RPL38;APOE;B2M;RPS12;CD74;GPX1;RPS8;RPSA;RPL23A;RPS29;RPS3A1;RPS27RT;PABPC1;RPS24
4-Hydroxynonenal 5283344 human GSE2397 sample 3082	27/218	1.07265e-26	7.53346e-26	0	0	18.4856	1105.38	RPL3;HSP90AB1;RPL32;RPL12;RPLP0;RPL36A;RPL8;RPL6;ACTB;ACTG1;RPS4X;RPL7A;RPS17;UBB;RPS18;UBC;PSAP;RPS2;RPL41;RPS8;RPS6;RPL13A;RPL23A;EEF1A1;EEF1G;GAPDH;TPT1
MK-886 CID 3651377 human GSE3202 sample 3193	32/368	1.11634e-26	7.78005e-26	0	0	12.9786	775.563	RPL4;RPL12;RPLP0;RPL8;ACTB;ACTG1;RPS15;UBB;RPS18;FTH1;UBC;PSAP;RPS2;RPS11;B2M;RPL17;RPS12;HSPA8;RPS9;GPX1;RPS5;RPS6;RPL13A;RPSA;RPL23A;EEF2;EEF1A1;EEF1G;LCN2;PABPC1;FAU;TPT1
morphine 5288826 mouse GSE7762 sample 3487	30/304	1.20135e-26	8.30858e-26	0	0	14.729	879.081	RPL4;RPL3;RPL32;RPLP1;RPL11;ACTB;RPL7;RPS15;RPL7A;PSAP;RPL14;APOE;RPS2;RPS11;RPS27A;RPL17;HSPA8;RPS7;RPS8;RPS5;RPL13A;MT2;RPL23A;MT1;EEF1A1;RPS29;RPL26;RPS21;GAPDH;RPS24
titanium dioxide NA mouse GSE7475 sample 2824	31/339	1.63429e-26	1.12171e-25	0	0	13.6486	810.398	H2-T23;HSP90AB1;RPLP0;RPL11;RPL36A;TRF;RPL8;HSP90B1;RPS15;C3;FTL1;PSAP;RPL36;RPL14;RPLP2;RPS27A;B2M;CD74;GPX1;RPS7;RPS8;RPL13A;RPSA;MT2;RPS3A1;RPS27RT;LCN2;RPL26;RPS21;GAPDH;RPS24
dexamethasone DB01234 rat GSE15563 sample 2713	30/309	1.95829e-26	1.33399e-25	0	0	14.4907	857.776	IFITM3;RPL4;RPL3;LYZ2;RPL12;RPL36A;RPL8;RPL6;ACTB;RPL7;C3;RPL7A;RPS17;UBB;RPS18;RPS3;RPL38;RPS2;RPS11;B2M;RPS12;RPL19;HSPA8;CD74;RPS9;RPL41;RPS5;RPL23A;RPL26;PTMA
imatinib DB00619 mouse GSE51698 sample 2522	29/288	5.12616e-26	3.4659e-25	0	0	15.029	875.183	IFITM3;RPL4;HSP90AB1;LYZ2;RPL12;RPLP0;RPL11;RPL36A;TRF;RPL8;RPL6;RPL7;RPS15;RPS17;FTL1;UBC;RPL36;RPS3;APOE;RPS2;RPS11;RPS12;RPL19;HSPA8;RPS7;RPL23A;EEF2;RPL26;PABPC1
isoflurane DB00753 rat GSE1779 sample 2770	31/353	5.65481e-26	3.795e-25	0	0	13.1073	761.987	RPL4;LYZ2;RPL12;RPL11;RPL7;RPS15;RPS4X;RPS17;FTL1;UBC;RPL14;RPS2;RPS11;RPS27A;B2M;RPL17;RPL41;GPX1;RPS7;RPS8;RPS5;RPS6;RPL23A;EEF1A1;EEF1G;RPS29;RPL26;FAU;RPS21;PTMA;GAPDH
Curcumin CID 969516 human GSE10896 sample 3258	28/261	6.69765e-26	4.46182e-25	0	0	16.0119	928.137	RPL4;RPL3;RPL32;RPL12;RPLP0;RPL36A;RPL6;ACTB;RPS15;RPS4X;RPS17;UBC;PSAP;RPS3;RPS2;RPL19;HSPA8;RPL41;RPS6;RPL23A;EEF2;EEF1A1;BST2;EEF1G;RPL26;PABPC1;GAPDH;RPS23
dexamethasone DB01234 mouse GSE5463 sample 2709	24/162	1.04174e-25	6.88919e-25	0	0	22.1117	1271.95	RPL5;HSPA8;RPL41;RPL3;HSP90AB1;RPS7;RPLP1;RPS6;RPLP0;RPL23A;RPL8;RPL7;EEF1A1;UBB;RPS3A1;RPL13;RPS2;RPS11;RPS27A;PTMA;RPS24;TPT1;RPS23;RPL19
EPZ004777 56962336 human GSE29828 sample 2651	27/238	1.1972e-25	7.85985e-25	0	0	16.9321	971.645	RPL3;RPL32;RPLP1;RPL12;RPL8;ACTB;ACTG1;RPS4X;RPS17;PSAP;RPL36;RPL13;RPS2;RPS9;RPL41;RPL13A;RPL23A;EEF2;EEF1A1;BST2;EEF1G;RPL37A;FAU;RPS21;S100A8;RPS24;TPT1
5-Fluorouracil 3385 mouse GSE1559 sample 3635	29/298	1.37819e-25	8.98301e-25	0	0	14.5247	831.449	IFITM3;RPLP1;RPLP0;RPL36A;RPL8;ACTG1;RPL7A;RPS17;UBB;FTH1;TMSB4X;UBC;RPL36;RPL13;RPS2;RPS27A;B2M;RPL19;HSPA8;RPL41;RPS7;RPS5;RPS6;RPL13A;RPL23A;RPS27RT;RPL37A;GAPDH;RPS23
grepafloxacin 72474 human GSE9166 sample 2627	21/105	1.74054e-25	1.12638e-24	0	0	29.8507	1701.8	IFITM3;FGB;FGA;RPL41;ORM1;RPL32;FGG;HP;APOA2;APOA1;RPL23A;ORM2;EEF1A1;HPX;APOC1;LCN2;SAA2;RPL26;GC;B2M;CFB
sapphyrin PCI-2050 (1.25 &Icirc;&frac14;M) 9855235 human GSE6400 sample 3101	31/367	1.8549e-25	1.19187e-24	0	0	12.6073	717.943	RPL4;RPL5;RPL32;RPLP1;RPL11;RPL6;ACTB;ACTG1;RPS18;FTH1;TMSB4X;RPL36;RPS3;RPL14;RPLP2;RPL13;RPS27A;RPL17;RPL19;HSPA8;RPS7;RPS8;RPS5;RPS6;EEF2;EEF1A1;RPS29;RPL26;RPS21;TPT1;RPS23
apratoxin A 6326668 human GSE2742 sample 3067	27/245	2.64219e-25	1.68579e-24	0	0	16.4484	930.863	RPL5;RPLP1;RPL11;RPL36A;RPL6;RPS14;RPS17;UBC;RPL36;RPS3;RPL14;RPL38;RPS27A;B2M;RPL19;HSPA8;RPL41;RPS7;RPS8;RPSA;RPL37A;RPL26;RPS21;PTMA;RPS24;TPT1;RPS23
actinomycin D 2019 human GSE6400 sample 3098	28/277	3.5679e-25	2.2605e-24	0	0	15.087	849.288	RPL4;RPL3;RPL32;RPL11;RPL36A;RPL8;RPL6;ACTB;RPS15;RPL7A;RPS17;FTH1;TMSB4X;RPL36;RPS3;RPL14;RPL13;RPL17;RPL19;RPS9;GPX1;RPS7;RPS8;RPL23A;CCNB1IP1;RPL26;FAU;GAPDH
Lipopolysaccharide 11970143 mouse GSE367 sample 3656	29/309	3.92384e-25	2.46875e-24	0	0	14.0076	787.195	RPL5;RPL3;RPLP1;RPLP0;RPL8;RPL6;RPL7;HSP90B1;FTH1;TMSB4X;RPS3;RPL14;RPL13;RPS2;RPS11;RPS27A;RPL19;RPL41;RPS7;RPS5;RPL13A;MT2;RPL23A;EEF1A1;RPS3A1;PTMA;RPS24;TPT1;RPS23
Lipopolysaccharide 11970143 mouse GSE367 sample 3657	26/223	5.01588e-25	3.13406e-24	0	0	17.4018	973.665	IFITM3;RPLP1;RPL36A;RPL8;RPL7A;RPS17;TMSB4X;RPL36;RPS3;RPL14;RPL13;RPS2;RPS11;RPS27A;RPL19;RPL41;RPS7;RPS5;RPL13A;MT2;RPL23A;RPS27RT;PTMA;RPS24;TPT1;RPS23
Bisphenol A 6623 mouse GSE4650 sample 3575	26/225	6.34883e-25	3.93976e-24	0	0	17.2471	960.945	RPL4;RPL5;RPL3;RPLP1;RPLP0;RPL8;ACTG1;FTL1;FTH1;UBC;RPLP2;RPL13;RPS2;RPS27A;RPL19;HSPA8;RPS5;MT2;RPL23A;MT1;EEF1A1;RPS3A1;RPL26;PTMA;TPT1;RPS23
cyclosporine DB00091 mouse GSE1809 sample 3299	27/254	7.05219e-25	4.34645e-24	0	0	15.8656	882.304	RPL5;RPL3;LYZ2;HBA-A2;RPL6;ACTB;HSP90B1;RPS15;RPS14;RPL7A;FTH1;RPL36;RPL14;RPL13;B2M;RPL19;CD74;RPL41;RPS5;H2-AA;RPS3A1;RPS27RT;RPL26;PTMA;GAPDH;H2-D1;TPT1
estradiol DB00783 rat GSE5315 sample 2537	31/385	7.95142e-25	4.86756e-24	0	0	12.0178	666.885	RPL5;RPL3;HSP90AB1;RPL8;RPL6;ACTB;ACTG1;HSP90B1;FTL1;UBB;RPS18;FTH1;RPL14;RPLP2;APOE;RPS2;RPS11;RPS27A;B2M;RPS12;RPL19;HSPA8;RPS8;RPS5;RPS6;RPL13A;EEF1A1;EEF1G;RPS29;RPL26;TPT1
quercetin DB04216 mouse GSE38067 sample 3440	26/227	8.01744e-25	4.87504e-24	0	0	17.0951	948.49	HP;TRF;C3;RPS14;HPX;SERPINA1B;SERPINA1C;TTR;RPL36;FGB;GPX1;AMBP;APOA2;RPL13A;APOA1;MT1;EEF1A1;FABP1;RPS29;RPS3A1;ALB;LCN2;SAA1;SAA2;HAMP;TPT1
BPDE 41322 human GSE19510 sample 3378	30/352	9.40544e-25	5.68088e-24	0	0	12.7205	703.74	IFITM3;RPL32;RPLP1;RPL12;RPLP0;RPL8;RPS15;RPS17;UBB;RPS18;FTH1;PSAP;RPL36;RPL13;RPS2;RPS11;B2M;RPS12;RPS9;RPL41;GPX1;RPS5;RPSA;RPL23A;EEF1G;RPS29;FAU;RPS21;GAPDH;RPS24
estradiol DB00783 human GSE1153 sample 2735	23/157	1.51431e-24	9.08585e-24	0	0	21.8652	1199.24	RPS9;RPL41;RPL32;RPLP1;RPL36A;RPL8;ACTB;RPS15;EEF1A1;RPS4X;RPS17;RPS29;TMSB4X;UBC;RPL37A;RPL38;RPS2;B2M;RPS21;GAPDH;RPL17;RPS12;RPS23
PRISTANE 15979 mouse GSE17297 sample 3230	29/325	1.67348e-24	9.97485e-24	0	0	13.318	729.124	IFITM3;H2-T23;HSP90AB1;RPL32;LYZ2;H2-K1;RPLP0;HP;RPL36A;RPL8;C3;RPS14;FTL1;PSAP;RPL13;HSPA8;CD74;GPX1;RPS8;RPS5;RPL13A;BST2;RPS3A1;LCN2;FAU;IFI27L2A;S100A9;PTMA;S100A8
Lapatinib DB01259 human GSE38376 sample 2584	29/326	1.82744e-24	1.08213e-23	0	0	13.2772	725.719	RPL4;RPL5;RPL3;RPLP1;RPL12;RPL6;RPL7;ACTG1;RPS4X;RPS18;UBC;PSAP;RPS3;RPS2;RPS11;RPS27A;B2M;RPL17;RPL19;RPS9;RPS5;RPL13A;RPSA;EEF2;EEF1G;MYH9;RPL26;PABPC1;TPT1
quercetin 5280343 human GSE7259 sample 3416	29/327	1.99497e-24	1.17366e-23	0	0	13.2366	722.338	RPL4;HSP90AB1;RPL32;RPL12;RPLP0;RPL8;ACTB;ACTG1;HSP90B1;RPL7A;TMSB4X;UBC;PSAP;RPLP2;RPS2;RPL17;RPS12;RPL41;RPS6;RPSA;RPL23A;CCNB1IP1;EEF1A1;EEF1G;RPL37A;PTMA;GAPDH;RPS24;TPT1
Phosgene 6371 mouse GSE2565 sample 3614	30/364	2.52456e-24	1.47565e-23	0	0	12.3011	668.394	RPL4;RPL3;HSP90AB1;RPLP0;RPL11;HP;RPL6;RPL7A;RPS17;FTL1;UBC;RPL14;RPL38;RPS2;RPS11;RPS27A;RPL41;GPX1;RPS8;RPSA;MT2;MT1;EEF1G;LCN2;RPL26;FAU;S100A9;GAPDH;S100A8;RPS23
Phosgene 6371 mouse GSE2565 sample 3612	28/299	3.01159e-24	1.74904e-23	0	0	13.9769	756.985	RPL4;RPL3;HSP90AB1;RPL36A;HBA-A2;RPL7A;RPS17;FTL1;UBC;RPS3;RPL14;RPL38;RPS2;RPS11;B2M;HSPA8;RPL41;RPS8;RPL13A;MT2;RPL23A;MT1;RPS27RT;RPL37A;FAU;IFI27L2A;S100A9;S100A8
decitabine DB01262 human GSE9118 sample 2703	27/271	4.07195e-24	2.3498e-23	0	0	14.8703	800.883	IFITM3;RPL3;RPL32;RPLP1;RPL12;RPL11;RPL36A;RPL8;ACTG1;RPL7A;UBB;RPS18;FTH1;TMSB4X;UBC;PSAP;RPS3;RPL13;RPL38;B2M;RPL19;RPS8;RPL23A;SAA2;FAU;TPT1;RPS23
imatinib DB00619 human GSE24493 sample 2764	26/244	5.33826e-24	3.06105e-23	0	0	15.9041	852.255	RPL5;RPL3;RPL32;RPL12;RPLP0;RPL36A;RPS4X;RPL7A;UBC;PSAP;RPL14;RPLP2;RPL13;RPS2;B2M;RPS9;RPL41;RPS7;RPS8;RPL13A;CCNB1IP1;EEF1G;RPS29;APOC1;RPS21;RPS24
PRISTANE 15979 mouse GSE17297 sample 3227	30/374	5.5938e-24	3.18741e-23	0	0	11.9722	640.997	IFITM3;H2-T23;LYZ2;H2-K1;RPLP0;HP;RPL36A;RPL8;ACTB;ACTG1;RPS15;C3;FTL1;TMSB4X;PSAP;RPL36;APOE;CD74;GPX1;RPS8;RPL13A;MT2;H2-AA;BST2;RPS3A1;LCN2;FAU;S100A9;PTMA;S100A8
Phosgene 6371 mouse GSE2565 sample 3615	29/342	7.1828e-24	4.06726e-23	0	0	12.656	674.444	RPLP1;RPLP0;RPL11;HP;RPL36A;RPL8;RPL6;RPL7;RPS17;RPS18;RPL36;RPL14;RPL13;RPL38;RPS2;RPS11;RPS27A;GPX1;RPS7;RPS8;RPL13A;RPSA;MT2;MT1;EEF1G;LCN2;RPL26;GAPDH;RPS23
alitretinoin DB00523 rat GSE3952 sample 2675	27/280	9.81283e-24	5.522e-23	0	0	14.3923	762.482	LYZ2;RPL12;RPLP0;RPL11;RPL6;ACTB;ACTG1;RPS15;RPS14;RPL7A;FTL1;UBB;RPS18;PSAP;RPS3;RPL14;RPLP2;RPS2;CD74;GPX1;RPSA;EEF2;EEF1G;LCN2;FAU;GAPDH;CFB
methylprednisolone 6741 rat GSE490 sample 3667	26/252	1.23915e-23	6.93004e-23	0	0	15.3992	812.231	IFITM3;ORM1;LYZ2;HP;C3;RPS14;HPX;TTR;FTH1;APOE;RPS2;GC;B2M;RPL17;RPS12;FGA;RPS6;FGG;ALB;APOC1;LCN2;S100A9;RPS21;S100A8;CFB;TPT1
Mercury 23931 human GSE6907 sample 3533	26/254	1.52245e-23	8.46223e-23	0	0	15.2779	802.69	IFITM3;RPL5;HSP90AB1;RPL32;RPL12;RPL11;ACTB;RPS15;RPS4X;RPL7A;RPS17;RPS18;RPS3;RPL14;RPLP2;RPL13;RPL19;RPL41;RPS5;RPL13A;EEF1A1;ALB;HAMP;GAPDH;RPS24;RPS23
medroxyprogesterone acetate DB00603 mouse GSE10392 sample 2779	28/318	1.65958e-23	9.16816e-23	0	0	13.1418	689.327	IFITM3;RPL32;LYZ2;RPL12;RPL11;RPL8;RPL7;HSP90B1;RPS15;RPL7A;RPS18;FTH1;RPL36;RPLP2;RPS11;B2M;RPL19;RPL41;RPSA;RPL23A;EEF1G;RPS29;RPS3A1;RPS27RT;RPL37A;LCN2;GAPDH;RPS24
Cigarette Smoke 57288536 human GSE8823 sample 2478	27/291	2.75804e-23	1.51441e-22	0	0	13.8483	719.348	RPL4;RPL3;HSP90AB1;RPL12;RPLP0;RPL11;RPL8;RPL6;RPS17;TMSB4X;RPS3;RPL13;APOE;RPS2;RPS11;RPL17;HSPA8;GPX1;RPS8;RPS5;RPS6;RPL13A;RPSA;EEF2;EEF1A1;EEF1G;APOC1
quercetin DB04216 mouse GSE38067 sample 3441	20/114	4.33674e-23	2.36692e-22	0	0	26.1849	1348.32	FGA;FGG;SERPINA3K;APOA2;TRF;APOA1;ACTB;EEF1A1;SERPINA1A;FABP1;HPX;SERPINA1B;TTR;ALB;APOC1;APOE;GC;HAMP;GAPDH;TPT1
methotrexate DB00563 human GSE11440 sample 2543	25/236	4.96577e-23	2.69401e-22	0	0	15.8108	811.992	RPL5;RPL3;RPL12;RPLP0;RPL11;RPL36A;ACTG1;RPS4X;RPL7A;RPS18;TMSB4X;RPL13;RPS2;RPS27A;RPS9;RPL41;RPS7;RPSA;EEF2;EEF1G;RPS29;RPS21;GAPDH;TPT1;RPS23
Mehp 20393 rat GSE4514 sample 3579	27/299	5.69307e-23	3.07019e-22	0	0	13.4778	690.334	RPL4;RPL5;HSP90AB1;RPLP1;RPLP0;RPL6;ACTB;RPS17;FTL1;UBB;FTH1;TMSB4X;RPL38;RPS11;RPS27A;RPL17;RPL19;HSPA8;RPL41;RPS8;RPS6;RPSA;RPS29;RPL26;PTMA;RPS24;RPS23
lapatinib DB01259 human GSE38376 sample 2585	27/299	5.69307e-23	3.05203e-22	0	0	13.4778	690.334	RPL4;RPL5;RPL3;RPLP1;RPLP0;RPL7;ACTG1;RPS4X;RPS18;PSAP;RPS3;RPS2;RPS11;B2M;RPS12;RPL19;RPS9;RPS6;RPL13A;RPSA;EEF2;EEF1A1;EEF1G;RPL26;PABPC1;TPT1;RPS23
d-serine 71077 rat GSE10748 sample 3387	30/411	8.75583e-23	4.66634e-22	0	0	10.8944	553.325	RPL4;RPL3;RPL12;RPLP0;RPL11;RPL8;RPL6;RPL7;ACTG1;RPS4X;RPS14;RPL7A;PSAP;RPS3;RPL14;APOE;RPS2;RPS11;RPS27A;RPL17;RPL41;RPS7;RPS5;RPS6;EEF1A1;EEF1G;RPS29;FAU;GAPDH;RPS23
cyclophosphamide 2907 mouse GSE2254 sample 3626	30/413	1.00791e-22	5.34018e-22	0	0	10.8417	549.12	IFITM3;RPL3;HSP90AB1;LYZ2;H2-K1;RPL6;ACTG1;HSP90B1;C3;RPL7A;SERPINA1B;UBB;FTH1;UBC;PSAP;RPS3;APOE;RPS2;GC;B2M;HSPA8;CD74;EEF2;H2-AA;EEF1A1;RPS3A1;PABPC1;PTMA;GAPDH;H2-D1
cocaine 446220 human GSE54839 sample 2472	27/306	1.05483e-22	5.55624e-22	0	0	13.1694	666.42	RPL4;RPL5;HSP90AB1;RPLP1;RPL12;RPL11;ACTB;ACTG1;RPS17;TMSB4X;RPS3;RPL38;APOE;RPS11;B2M;RPL17;RPS12;RPL19;HSPA8;CD74;RPSA;EEF1A1;RPS29;RPL37A;APOC1;HAMP;TPT1
4-Hydroxynonenal 5283344 human GSE2397 sample 3078	25/244	1.14538e-22	5.99835e-22	0	0	15.2924	772.589	RPL3;HSP90AB1;RPL32;RPLP1;RPL12;RPL11;RPL6;ACTG1;RPL7A;RPS17;RPS18;FTH1;UBC;RPL14;RPS2;HSPA8;RPL41;RPS7;RPS8;RPL13A;RPSA;RPL23A;BST2;RPS21;GAPDH
imatinib DB00619 human GSE23743 sample 2763	25/246	1.40485e-22	7.31491e-22	0	0	15.1681	763.21	RPL5;RPL12;RPLP0;ACTB;ACTG1;RPS4X;RPS17;UBC;RPLP2;RPL13;RPL38;RPS2;RPS27A;B2M;RPS12;RPS8;RPS6;RPL13A;RPL23A;EEF2;EEF1A1;EEF1G;RPS29;RPS21;TPT1
metformin DB00331 mouse GSE35961 sample 3308	27/314	2.09448e-22	1.08434e-21	0	0	12.8339	640.638	ORM1;RPLP1;RPL11;RPL36A;TRF;HBA-A2;HPX;RPL7A;FTH1;RPL36;RPLP2;RPL13;RPL38;RPS11;FGB;FGA;AMBP;AHSG;RPS5;FGG;RPL13A;MT2;RPL23A;MT1;RPS29;LCN2;GAPDH
4-Hydroxytamoxifen 449459 human GSE26298 sample 3240	28/350	2.31015e-22	1.1892e-21	0	0	11.9403	594.86	RPL4;RPL3;RPLP1;RPL12;RPL11;RPL36A;RPL6;RPS15;RPS18;RPL36;RPS3;RPL14;RPL13;RPS11;RPS27A;RPL17;RPL19;RPS9;RPS5;RPS6;RPL13A;RPSA;CCNB1IP1;EEF1G;RPS29;RPL26;FAU;GAPDH
isoflurane 3763 rat GSE6433 sample 3654	27/316	2.47875e-22	1.26879e-21	0	0	12.7527	634.435	RPL4;RPL5;RPS15;RPS14;RPL7A;RPS17;FTL1;TTR;FTH1;TMSB4X;UBC;PSAP;RPL36;RPS27A;B2M;RPL17;RPS12;RPS9;RPS8;EEF1A1;EEF1G;RPS29;RPL26;FAU;RPS21;PTMA;RPS23
imatinib DB00619 human GSE20876 sample 2510	30/427	2.64409e-22	1.34581e-21	0	0	10.4862	521.003	RPL4;RPL5;RPL3;RPLP0;RPL36A;RPL8;RPL6;ACTG1;RPL7A;RPS17;FTH1;TMSB4X;RPL36;RPS3;RPL14;RPS2;B2M;RPL17;RPS9;GPX1;RPS8;RPS5;RPS6;RPSA;EEF1A1;EEF1G;RPS29;PABPC1;RPS21;PTMA
nilotinib DB04868 human GSE19567 sample 2528	24/223	2.68296e-22	1.35797e-21	0	0	16.0632	797.857	HSPA8;RPL41;RPL3;RPS5;RPLP1;RPLP0;RPL36A;RPL13A;RPL23A;RPS15;EEF1A1;RPS4X;EEF1G;UBB;RPS18;FTH1;PSAP;RPL37A;APOC1;APOE;RPS27A;RPS24;TPT1;RPS23
trovafloxacin DB00685 human GSE9166 sample 3036	21/149	4.15002e-22	2.08884e-21	0	0	21.0358	1035.67	RPL41;ORM1;RPLP1;HP;APOA2;APOA1;RPL23A;RPL8;ORM2;RPL6;HPX;TTR;RPS29;FTH1;ALB;APOC1;RPS3;SAA2;RPL38;FAU;RPL19
pertuzumab DB06366 human GSE31432 sample 3124	26/291	5.11499e-22	2.56032e-21	0	0	13.3354	653.763	IFITM3;RPL12;RPLP0;RPL6;ACTB;ACTG1;HSP90B1;RPS15;RPS17;UBB;TMSB4X;PSAP;RPL36;RPS3;RPLP2;RPS2;RPS11;RPL17;RPS12;HSPA8;RPS9;RPSA;EEF2;EEF1A1;MYH9;PABPC1
carboplatin DB00958 human GSE7035 sample 3060	22/178	7.78489e-22	3.87533e-21	0	0	18.4471	896.615	HSPA8;HSP90AB1;RPS6;RPLP0;RPL11;RPSA;RPL23A;ACTB;ACTG1;EEF1A1;UBB;UBC;RPS3;MYH9;RPL26;RPS2;RPS11;RPS27A;GAPDH;RPS24;TPT1;RPS23
pioglitazone DB01132 human GSE8157 sample 2796	27/331	8.45354e-22	4.18519e-21	0	0	12.1748	590.748	IFITM3;RPL32;RPL12;RPLP0;RPL11;RPL36A;RPL7;RPS15;RPS4X;RPS17;UBB;RPS18;TMSB4X;RPL36;RPL14;RPS11;RPL41;RPS8;RPL13A;RPL23A;RPL37A;MYH9;RPL26;FAU;RPS21;RPS24;RPS23
bexarotene 82146 rat GSE3952 sample 3562	24/237	1.16117e-21	5.71749e-21	0	0	15.1143	728.583	IFITM3;RPL5;LYZ2;RPL12;RPLP0;RPSA;EEF2;ACTB;ACTG1;RPS15;RPS14;UBB;RPS18;RPS29;PSAP;MYH9;RPL26;APOE;RPS11;S100A9;RPS21;S100A8;RPS24;RPS12
curcumin 969516 human GSE10896 sample 3407	25/270	1.42344e-21	6.97103e-21	0	0	13.8198	663.367	RPL4;HSP90AB1;RPL32;RPL8;RPL6;ACTB;RPS18;TMSB4X;UBC;RPL36;RPS3;B2M;HSPA8;RPS9;GPX1;RPS7;RPS8;RPS6;RPL13A;RPSA;EEF2;BST2;EEF1G;FAU;GAPDH
doxycycline DB00254 human GSE2624 sample 3076	25/272	1.70858e-21	8.32244e-21	0	0	13.7182	655.984	IFITM3;RPL5;HSP90AB1;RPL11;ACTG1;RPS4X;RPS18;FTH1;UBC;PSAP;RPS2;RPS11;RPS27A;B2M;RPL19;HSPA8;EEF1A1;BST2;RPS29;PABPC1;RPS21;CFB;RPS24;TPT1;RPS23
carbidopa DB00190 mouse GSE47099 sample 3293	27/341	1.85158e-21	8.97077e-21	0	0	11.8177	564.158	ORM1;HP;TRF;ORM2;C3;HPX;SERPINA1B;SERPINA1C;SERPINA1D;TTR;GC;FGB;FGA;WFDC21;AMBP;AHSG;FGG;SERPINA3K;APOA2;HBB-BT;MT2;MT1;ALB;APOC1;LCN2;SAA2;HAMP
MT19c compound SID 134222379 human GSE23616 sample 3353	25/276	2.45077e-21	1.18106e-20	0	0	13.5194	641.6	RPL5;RPLP1;RPL11;RPL36A;RPL6;HSP90B1;C3;RPS14;RPL7A;RPS17;RPS18;RPS3;RPS11;RPS27A;B2M;RPS12;RPS9;RPS8;RPS6;RPL13A;RPL26;RPS21;GAPDH;CFB;TPT1
CONCANAVALIN A 596316 mouse GSE17184 sample 3366	24/245	2.57062e-21	1.23226e-20	0	0	14.6208	693.173	IFITM3;FGB;HSPA8;H2-T23;FGA;ORM1;H2-K1;FGG;HP;MT2;MT1;ORM2;ACTB;ACTG1;C3;HPX;LCN2;SAA1;SAA2;B2M;S100A9;HAMP;S100A8;H2-D1
halothane 3562 rat GSE6433 sample 3651	27/348	3.15756e-21	1.50566e-20	0	0	11.58	546.629	RPL3;HSP90AB1;RPL11;RPL8;RPL6;RPS4X;RPS14;RPL7A;RPS17;UBB;RPS18;UBC;RPL36;RPS3;RPLP2;RPS11;RPS27A;RPL17;RPL19;HSPA8;RPS7;RPS8;RPS5;RPS6;RPL13A;FAU;RPS21
acrylamide 6579 rat GSE29004 sample 3131	27/348	3.15756e-21	1.49778e-20	0	0	11.58	546.629	IFITM3;RPL5;LYZ2;RPLP1;RPL11;RPL36A;RPL8;ACTB;ACTG1;C3;FTL1;FTH1;TMSB4X;PSAP;RPS3;APOE;RPS27A;B2M;RPL19;CD74;RPS9;RPL41;RPS8;RPSA;RPS29;RPS24;RPS23
decitabine DB01262 human GSE29077 sample 2539	25/279	3.20005e-21	1.51003e-20	0	0	13.374	631.134	RPLP0;RPL36A;RPL8;RPL6;ACTG1;RPS15;RPL7A;RPS17;UBB;RPS18;UBC;RPLP2;RPS2;RPS27A;B2M;RPL41;GPX1;RPS7;RPS5;RPL23A;APOC1;PABPC1;FAU;TPT1;RPS23
Cadmium Chloride 24947 rat GSE9480 sample 3413	22/190	3.35019e-21	1.57268e-20	0	0	17.282	814.765	RPL5;RPL41;RPL32;RPS7;RPS5;RPLP0;RPL11;HP;RPL23A;RPL7;RPS14;RPL7A;RPS18;RPS29;FTH1;UBC;PABPC1;RPS27A;RPS21;RPL17;RPS12;RPL19
Lapatinib DB01259 human GSE38376 sample 2583	26/317	4.54729e-21	2.12363e-20	0	0	12.2416	573.395	RPL4;RPL5;RPL3;RPLP1;RPL12;RPL11;RPL7;RPS4X;RPS18;PSAP;RPL36;RPS3;RPS11;RPS27A;B2M;RPL17;RPL19;RPS9;RPL13A;RPSA;EEF2;RPS29;RPL37A;RPL26;PABPC1;RPS23
motexafin gadolinium (24 h) DB05428 human GSE2189 sample 3128	22/198	8.38291e-21	3.89483e-20	0	0	16.5837	766.635	GPX1;RPL32;RPS8;RPS5;RPLP1;RPL12;RPLP0;RPL11;RPL8;EEF2;RPL6;EEF1A1;RPS4X;RPS18;FTH1;RPL36;RPL26;RPS2;GAPDH;RPL17;TPT1;RPL19
levetiracetam 5284583 rat GSE2880 sample 2669	22/201	1.16999e-20	5.40821e-20	0	0	16.3362	749.746	HSPA8;RPL32;RPS8;RPL11;RPL13A;RPL23A;RPL6;RPL7;EEF1A1;RPS4X;RPS14;UBB;RPS18;TMSB4X;UBC;RPL38;RPL26;RPS27A;RPS21;RPL17;TPT1;RPS12
Harman 5281404 human GSE5080 sample 3482	21/174	1.17461e-20	5.40202e-20	0	0	18.0134	826.648	RPL5;RPL41;RPL3;RPS6;RPL23A;RPL8;RPL6;ACTB;HSP90B1;RPS4X;RPS18;FTH1;TMSB4X;UBC;PSAP;RPS3;MYH9;PABPC1;FAU;RPS23;RPL19
resveratrol DB02709 mouse GSE11291 sample 3503	25/297	1.48748e-20	6.80634e-20	0	0	12.5634	573.579	RPL4;RPL3;LYZ2;RPL12;HBA-A2;RPL6;RPL7;RPS14;RPL7A;TMSB4X;RPL13;APOE;RPS2;B2M;GPX1;RPS7;RPS5;MT2;MT1;EEF1A1;RPS3A1;RPL26;IFI27L2A;HAMP;RPS23
CONCANAVALIN A 596316 mouse GSE17184 sample 3365	26/334	1.70824e-20	7.77723e-20	0	0	11.6186	528.833	ORM1;HSP90AB1;H2-K1;RPLP0;HP;RPL36A;ORM2;ACTB;ACTG1;FTH1;B2M;FGB;HSPA8;FGA;WFDC21;AHSG;FGG;MT2;MT1;LCN2;SAA1;SAA2;FAU;S100A9;S100A8;H2-D1
clinafloxacin 60063 human GSE9166 sample 2625	19/130	2.14603e-20	9.72153e-20	0	0	21.814	987.914	FGA;ORM1;GPX1;RPLP1;FGG;HP;APOA2;RPL23A;ORM2;EEF1A1;C3;RPS17;APOC1;SAA2;RPL26;B2M;GAPDH;RPL17;RPS24
3,3',4,4'-Tetrachlorobiphenyl 36187 human GSE6878 sample 3271	26/341	2.8829e-20	1.29946e-19	0	0	11.38	512.021	IFITM3;ORM1;RPL3;HSP90AB1;RPL32;RPLP1;RPL12;RPL8;RPS15;C3;FTH1;UBC;RPL36;APOE;RPS11;HSPA8;RPS9;AMBP;RPS5;APOA1;RPSA;RPL23A;APOC1;RPL26;FAU;GAPDH
puromycin, EC50, 3 d 439530 human GSE6930 sample 3269	23/242	3.72524e-20	1.67083e-19	0	0	14.1853	634.6	RPL4;RPL5;RPL41;RPL32;RPLP1;RPL12;RPLP0;RPL11;RPL23A;RPL6;ACTB;CCNB1IP1;RPS15;EEF1A1;RPS4X;RPS18;FTH1;TMSB4X;RPS27A;RPS24;TPT1;RPS12;RPL19
doxycycline DB00254 human GSE2624 sample 3075	23/242	3.72524e-20	1.6626e-19	0	0	14.1853	634.6	IFITM3;RPL41;HSP90AB1;RPL12;RPS6;ACTB;RPL7;EEF1A1;RPS17;RPS18;RPS29;RPL37A;RPL14;RPL38;PABPC1;RPS2;RPS11;B2M;GAPDH;CFB;RPS12;RPS23;RPL19
cisplatin DB00515 mouse GSE6206 sample 3412	24/279	5.61141e-20	2.49213e-19	0	0	12.839	569.114	IFITM3;RPL4;GPX1;RPS5;RPL36A;RPL13A;RPL23A;RPL8;RPS15;EEF1A1;RPS17;RPS29;RPS3A1;FTH1;RPS27RT;RPS3;RPL13;RPL26;RPS2;RPS11;RPS27A;PTMA;RPS23;RPL19
type II IFN (IFN-gamma1b) DB00033 human GSE5542 sample 2477	24/279	5.61141e-20	2.47997e-19	0	0	12.839	569.114	IFITM3;RPL4;RPS9;RPS8;RPS5;RPLP1;RPL23A;RPL8;EEF2;C3;BST2;EEF1G;UBB;UBC;RPS2;RPS11;RPS27A;B2M;PTMA;GAPDH;RPS24;TPT1;RPS12;RPL19
motexafin gadolinium (12 h) DB05428 human GSE2189 sample 3127	24/280	6.10473e-20	2.6849e-19	0	0	12.7932	566.004	IFITM3;RPL5;RPS9;RPL3;HSP90AB1;RPS8;RPS5;RPL12;RPL36A;RPSA;RPL6;CCNB1IP1;RPS15;EEF1G;RPS14;RPL7A;FTH1;PSAP;RPL36;RPS3;MYH9;RPL13;FAU;RPS12
apratoxin A 6326668 human GSE2742 sample 3066	27/397	9.7521e-20	4.26831e-19	0	0	10.1508	444.341	RPL5;HSP90AB1;RPL32;RPL11;RPL36A;RPL6;RPL7A;UBB;TMSB4X;UBC;RPL36;RPS3;RPL14;RPLP2;RPS11;RPS27A;RPL19;RPS9;GPX1;RPS7;RPS8;RPS5;RPL37A;RPL26;FAU;RPS21;RPS24
doxycycline DB00254 mouse GSE29848 sample 3207	22/225	1.40157e-19	6.10492e-19	0	0	14.5937	633.535	RPL32;RPS7;RPS8;RPS5;RPL36A;RPL13A;MT2;MT1;HSP90B1;RPS4X;RPS17;RPS3A1;FTH1;TMSB4X;RPL14;RPL26;RPS11;RPS27A;RPS21;RPL17;RPS24;RPL19
2,3,7,8-tetrachlorodibenzo-p-dioxin 10852289 mouse GSE2812 sample 3602	21/200	2.24981e-19	9.75276e-19	0	0	15.6716	672.913	IFITM3;CD74;RPL41;RPS6;HBA-A2;RPL23A;RPL8;ACTG1;C3;PSAP;RPS27RT;RPL37A;APOE;RPS27A;B2M;PTMA;GAPDH;S100A8;RPS24;TPT1;RPS23
gatifloxacin 5379 human GSE9166 sample 2626	25/334	2.58825e-19	1.11665e-18	0	0	11.1717	478.127	RPL32;RPLP1;RPL36A;RPL6;C3;HPX;RPL36;RPS3;RPL14;GC;RPL17;RPL19;GPX1;RPS8;AHSG;FGG;APOA2;APOA1;RPSA;EEF2;RPS29;APOC1;SAA2;RPL26;RPS24
phenol 996 human GSE6907 sample 3528	25/336	2.98982e-19	1.28378e-18	0	0	11.1052	473.68	RPL4;ORM1;RPL12;RPL11;HP;RPL36A;RPL8;ACTB;C3;RPS17;RPS18;FTH1;RPL36;RPS3;RPL14;RPL13;RPS27A;B2M;RPS12;RPS9;RPS8;RPS5;RPL23A;EEF2;RPS29
methylprednisolone 6741 rat GSE490 sample 3671	20/175	3.1187e-19	1.3328e-18	0	0	17.0576	726.852	RPS9;RPS8;LYZ2;RPLP0;HP;RPL6;RPS4X;RPS14;RPL7A;FTH1;PSAP;RPL36;RPS3;RPLP2;RPS2;B2M;RPS21;GAPDH;RPL17;RPS23
estradiol 5757 mouse GSE2195 sample 3619	23/271	4.84766e-19	2.06196e-18	0	0	12.6673	534.188	RPL5;HSPA8;RPL41;RPL3;MT2;RPL6;RPL7;ACTG1;HSP90B1;EEF1A1;RPL7A;RPS3A1;FTH1;TMSB4X;UBC;RPS27RT;RPL37A;RPS3;RPS2;RPS27A;PTMA;RPS24;TPT1
bexarotene DB00307 human GSE12791 sample 2681	25/347	6.49942e-19	2.75162e-18	0	0	10.7532	450.314	IFITM3;RPLP1;HSP90B1;RPS15;C3;RPS14;RPS17;UBB;FTH1;TMSB4X;UBC;PSAP;RPS11;B2M;RPS12;RPL19;CD74;GPX1;RPL13A;BST2;RPS29;LCN2;SAA2;PTMA;RPS23
doxorubicin, EC50, 3 d 31703 human GSE6930 sample 3261	23/275	6.74178e-19	2.84096e-18	0	0	12.483	522.3	IFITM3;RPL4;RPL32;RPLP1;RPL12;RPLP0;RPL11;RPSA;RPL23A;EEF2;CCNB1IP1;RPS17;RPS18;RPS29;FTH1;TMSB4X;PSAP;B2M;RPS24;TPT1;RPS12;RPS23;RPL19
5-Fluorouracil 3385 mouse GSE1559 sample 3640	19/156	7.55747e-19	3.16994e-18	0	0	18.1783	758.52	RPL5;RPL41;RPS5;RPLP1;RPL36A;RPL23A;RPL7;RPS17;UBB;RPS3A1;RPS27RT;RPL36;MYH9;RPL13;RPS11;GAPDH;RPS24;TPT1;RPS23
streptozocin DB00428 mouse GSE38067 sample 3439	24/313	8.27718e-19	3.45582e-18	0	0	11.4444	476.494	IFITM3;FGB;H2-T23;FGA;CD74;ORM1;HSP90AB1;AMBP;H2-K1;HBA-A2;ACTG1;HSP90B1;C3;BST2;FTL1;FTH1;TMSB4X;UBC;PSAP;APOE;GC;B2M;GAPDH;H2-D1
rosiglitazone DB00412 human GSE7035 sample 2810	23/281	1.09484e-18	4.5501e-18	0	0	12.2165	505.225	HSPA8;RPLP0;RPL11;RPSA;RPL7;ACTG1;EEF1A1;RPS14;RPL7A;RPS29;UBC;APOC1;RPS3;RPLP2;RPL26;RPS2;RPS11;RPS27A;B2M;GAPDH;RPS24;TPT1;RPS23
cisplatin DB00515 human GSE6410 sample 2532	23/285	1.50304e-18	6.21805e-18	0	0	12.045	494.317	IFITM3;GPX1;RPL32;RPS8;RPLP1;RPL11;RPL36A;RPL13A;EEF2;RPS17;RPS18;FTH1;RPL36;RPLP2;RPL38;FAU;RPS27A;B2M;RPS21;RPL17;TPT1;RPS12;RPL19
vitamin a DB00162 rat GSE284 sample 2839	21/219	1.50402e-18	6.19384e-18	0	0	14.312	587.341	RPS8;RPL12;RPLP0;RPL13A;RPSA;RPL6;ACTB;ACTG1;RPS15;EEF1A1;EEF1G;RPS14;RPS18;RPS29;TMSB4X;RPL36;RPS2;PTMA;GAPDH;TPT1;RPL19
paclitaxel 36314 human GSE12791 sample 3238	20/191	1.81296e-18	7.43232e-18	0	0	15.6287	638.455	RPL4;RPL41;HSP90AB1;RPL32;RPL36A;RPL23A;ACTB;EEF1A1;RPS17;UBB;RPS18;RPS29;TMSB4X;UBC;MYH9;PABPC1;RPS11;B2M;GAPDH;RPS23
MLN4924 73014187 human GSE30531 sample 2646	22/257	2.51719e-18	1.02728e-17	0	0	12.7766	517.75	RPL41;RPL32;RPS6;RPL36A;RPSA;RPL23A;RPL6;ACTB;ACTG1;EEF1A1;RPS18;RPS29;FTH1;RPL38;RPS2;FAU;RPS11;RPS21;TPT1;RPS12;RPS23;RPL19
Triiodothyronine-[13C6] hydrochloride (T3 thyronine) 53442265 human GSE29159 sample 3045	24/332	3.24301e-18	1.31756e-17	0	0	10.7894	434.491	FGB;HSPA8;FGA;ORM1;AMBP;RPS8;RPLP1;FGG;RPL11;APOA2;ORM2;RPL6;ACTG1;C3;RPS4X;EEF1G;TTR;UBB;RPS18;APOC1;RPL38;APOE;GAPDH;RPL17
methylprednisolone 6741 rat GSE490 sample 3662	22/262	3.81181e-18	1.54174e-17	0	0	12.5328	502.669	IFITM3;HSPA8;HSP90AB1;RPS5;RPL12;RPS6;HP;UBB;RPS29;FTH1;RPL36;LCN2;RPS2;RPS11;B2M;S100A9;GAPDH;RPL17;S100A8;CFB;RPS12;RPL19
methylprednisolone 6741 rat GSE490 sample 3668	23/298	4.07204e-18	1.63967e-17	0	0	11.5196	461.272	IFITM3;HSPA8;RPS9;HSP90AB1;RPS8;LYZ2;RPS6;RPLP0;HP;RPS14;HPX;FTH1;UBC;RPL36;LCN2;RPS3;RPS27A;B2M;S100A9;RPL17;S100A8;CFB;RPS23
luteolin 5280445 human GSE53180 sample 3473	21/230	4.16291e-18	1.66885e-17	0	0	13.6275	545.377	RPL41;GPX1;RPS8;RPLP1;RPL12;RPL13A;HSP90B1;UBB;RPS18;FTH1;UBC;RPL37A;RPL36;RPLP2;RPL13;RPL38;RPS11;RPS21;RPS24;TPT1;RPS12
Hodgkin lymphoma CID 148177 human GSE31059 sample 2494	23/302	5.47988e-18	2.18712e-17	0	0	11.367	451.787	HSPA8;CD74;RPL41;HSP90AB1;RPL32;RPS5;RPLP1;RPL12;EEF2;HSP90B1;UBB;RPS18;UBC;RPL36;MYH9;RPL38;RPL26;PABPC1;RPS2;RPS27A;RPL17;TPT1;RPS12
Phosgene 6371 mouse GSE2565 sample 3613	24/341	6.0086e-18	2.38763e-17	0	0	10.5047	416.545	HSPA8;RPL3;HSP90AB1;RPS8;H2-K1;RPSA;MT2;HBA-A2;MT1;RPL8;EEF2;ACTB;FTL1;FTH1;UBC;RPS27RT;LCN2;RPLP2;RPS2;FAU;RPS27A;S100A9;GAPDH;S100A8
cyclophosphamide 2907 mouse GSE2254 sample 3627	25/384	7.33076e-18	2.90029e-17	0	0	9.71704	383.38	IFITM3;HSP90AB1;LYZ2;RPLP1;H2-K1;HP;RPL8;RPL6;ACTB;ACTG1;C3;RPL7A;UBB;FTH1;UBC;PSAP;APOE;RPS2;RPL19;HSPA8;EEF2;EEF1A1;PABPC1;GAPDH;H2-D1
HYPOCHLOROUS ACID 24341 human GSE11630 sample 3200	23/306	7.3424e-18	2.89227e-17	0	0	11.2184	442.599	RPL5;HSPA8;RPS9;HSP90AB1;RPS8;RPLP1;RPL36A;RPL23A;RPL8;RPL6;RPS15;RPS18;RPL36;RPS3;RPL14;RPLP2;RPL13;FAU;S100A9;RPL17;S100A8;RPS23;RPL19
menadione DB00170 mouse GSE23725 sample 2780	24/348	9.58673e-18	3.75999e-17	0	0	10.2934	403.357	CD74;HSP90AB1;RPL32;RPS7;LYZ2;RPL12;RPLP0;RPL11;MT2;MT1;RPL8;RPL6;RPL7;HSP90B1;RPS15;C3;RPS14;FTL1;PSAP;RPS2;FAU;B2M;GAPDH;RPS24
progesterone 5994 rat GSE8238 sample 3526	26/432	1.02994e-17	4.0221e-17	0	0	8.98286	351.36	RPL3;HSP90AB1;LYZ2;RPL36A;ACTB;HSP90B1;RPS15;C3;FTL1;FTH1;TMSB4X;UBC;PSAP;RPS3;RPL14;RPS2;RPL17;RPS9;RPS5;RPL23A;EEF1A1;EEF1G;RPS21;PTMA;GAPDH;TPT1
pimecrolimus DB00337 human GSE32473 sample 2574	24/350	1.09346e-17	4.25182e-17	0	0	10.2345	399.706	RPL4;RPS9;HSP90AB1;RPS7;RPS8;RPS5;RPL12;RPS6;RPL11;RPL36A;RPL13A;RPL8;EEF1G;RPS14;RPL7A;FTH1;TMSB4X;UBC;PSAP;RPL36;RPS3;RPL26;GAPDH;RPL19
genistein 5280961 mouse GSE2889 sample 3606	24/353	1.32989e-17	5.14908e-17	0	0	10.1476	394.323	IFITM3;RPL4;CD74;H2-K1;RPL36A;MT2;RPL23A;EEF2;H2-AA;RPL7;C3;EEF1G;RPS17;FTL1;RPS29;FTH1;PSAP;MYH9;APOE;B2M;S100A9;S100A8;H2-D1;RPS23
Cadmium Chloride 24947 rat GSE9480 sample 3414	22/281	1.70856e-17	6.58705e-17	0	0	11.6853	451.151	IFITM3;RPL5;RPL32;RPS7;RPS5;RPL11;HP;RPL13A;RPL23A;RPL7;HPX;FTL1;RPS18;UBC;RPS3;RPL38;PABPC1;RPS27A;RPS21;GAPDH;TPT1;RPS23
d-serine 71077 rat GSE10748 sample 3389	25/401	2.04688e-17	7.85792e-17	0	0	9.3051	357.573	RPL4;RPL3;RPLP1;RPLP0;RPL6;ACTB;ACTG1;RPS15;RPS4X;RPS14;FTH1;PSAP;RPS3;RPS2;RPS27A;RPL17;HSPA8;RPL41;RPS5;EEF1A1;EEF1G;RPS29;FAU;PTMA;GAPDH
Dmnq (2,3-Dimethoxy-1,4-naphthoquinone) 3136 human GSE6907 sample 3527	23/321	2.12e-17	8.10431e-17	0	0	10.6942	410.577	IFITM3;RPL5;RPL41;ORM1;HSP90AB1;RPL12;RPL11;ACTB;ACTG1;RPS15;EEF1A1;RPS4X;RPL7A;RPS17;RPS18;RPL37A;RPS3;RPL14;FAU;RPS21;HAMP;GAPDH;RPS23
doxorubicin DB00997 human GSE12972 sample 2720	24/361	2.22137e-17	8.45613e-17	0	0	9.92269	380.494	HSPA8;RPL41;GPX1;RPL32;RPLP1;RPL12;RPL36A;RPL23A;HSP90B1;RPS15;RPS4X;UBB;RPS29;FTH1;TMSB4X;UBC;PSAP;FAU;RPS11;B2M;PTMA;RPL17;RPS24;RPL19
Retinoic acid 444795 mouse GSE1588 sample 3631	21/253	2.96758e-17	1.12495e-16	0	0	12.3886	471.465	RPL5;RPL41;RPS5;RPLP1;RPS6;RPLP0;RPL23A;RPL6;RPS17;UBB;RPS3A1;TMSB4X;RPS27RT;RPL37A;RPL36;RPS3;RPS27A;B2M;TPT1;RPS23;RPL19
bleomycin DB00290 mouse GSE2640 sample 2851	23/329	3.6492e-17	1.37757e-16	0	0	10.4342	394.927	HSPA8;H2-T23;CD74;GPX1;H2-K1;RPL11;RPSA;MT2;MT1;RPL8;C3;EEF1G;FTL1;PSAP;LCN2;RPLP2;APOE;RPS2;FAU;IFI27L2A;S100A9;GAPDH;S100A8
imatinib DB00619 human GSE19567 sample 2527	21/256	3.77805e-17	1.4203e-16	0	0	12.2435	462.984	HSPA8;RPL41;RPS5;RPLP1;RPLP0;RPL36A;RPL13A;RPL23A;RPS15;EEF1A1;RPS4X;EEF1G;UBB;FTH1;PSAP;APOC1;APOE;FAU;RPS27A;TPT1;RPL19
lipopolysaccharide (LPS) 11970143 mouse GSE23639 sample 3443	21/261	5.61096e-17	2.10063e-16	0	0	12.0089	449.365	RPL5;H2-T23;CD74;RPL41;RPS7;RPLP1;RPL12;H2-K1;HP;ACTG1;C3;BST2;UBB;TMSB4X;RPL37A;SAA1;RPLP2;RPS27A;B2M;H2-D1;RPS23
amoxicillin DB01060 rat GSE2354 sample 2677	21/261	5.61096e-17	2.09199e-16	0	0	12.0089	449.365	RPL4;HSPA8;RPL3;HSP90AB1;RPLP1;RPS6;RPL11;RPL23A;RPL8;EEF2;RPL6;ACTB;RPS17;PSAP;PABPC1;FAU;RPS11;RPS21;GAPDH;RPS12;RPS23
alitretinoin DB00523 rat GSE3952 sample 2673	16/117	7.47692e-17	2.77626e-16	0	0	20.4108	757.895	FGB;ORM1;AMBP;HP;APOA2;C3;HPX;UBB;TMSB4X;ALB;APOC1;RPL26;APOE;GC;RPS21;CFB
Curcumin CID 969516 human GSE10896 sample 3259	17/142	7.74569e-17	2.86432e-16	0	0	17.8684	662.861	HSPA8;RPL41;GPX1;RPLP0;RPL13A;ACTB;EEF1A1;RPS17;RPS18;FTH1;UBC;RPL37A;B2M;S100A9;GAPDH;S100A8;TPT1
imatinib DB00619 human GSE1418 sample 2521	22/302	7.90416e-17	2.91105e-16	0	0	10.8728	403.126	IFITM3;RPL5;RPL41;RPLP1;APOA1;RPL23A;RPL6;RPL7;EEF1A1;RPS18;RPS29;FTH1;RPL37A;RPS3;APOE;PABPC1;RPS27A;B2M;RPS24;TPT1;RPS23;RPL19
doxorubicin, 2xEC50, 3 d 31703 human GSE6930 sample 3264	21/268	9.62612e-17	3.53088e-16	0	0	11.6953	431.315	IFITM3;RPL4;RPL32;RPLP1;RPL12;RPL11;RPSA;RPL23A;EEF2;ACTB;CCNB1IP1;RPS18;PSAP;PABPC1;FAU;GAPDH;RPS24;TPT1;RPS12;RPS23;RPL19
ciprofloxacin 2764 human GSE9166 sample 2624	21/268	9.62612e-17	3.51664e-16	0	0	11.6953	431.315	FGB;FGA;HSP90AB1;GPX1;RPLP1;FGG;HP;APOA2;RPL13A;APOA1;EEF2;RPS15;EEF1A1;C3;HPX;RPS3;SAA2;RPL26;GC;GAPDH;CFB
estradiol 5757 human GSE53394 sample 2652	23/351	1.51025e-16	5.49513e-16	0	0	9.78016	356.282	HSPA8;HSP90AB1;RPL32;RPS5;RPS6;RPL11;RPL36A;RPL23A;RPL8;ACTB;ACTG1;RPS29;TMSB4X;RPL36;RPLP2;RPL38;FAU;RPS27A;PTMA;GAPDH;RPS24;RPS23;RPL19
Caerulein 16132921 rat GSE5509 sample 3566	21/275	1.62605e-16	5.8928e-16	0	0	11.3976	414.361	FGB;RPL5;FGA;WFDC21;ORM1;FGG;HP;APOA1;RPL8;RPL6;ACTB;ACTG1;C3;RPS14;HPX;LCN2;RPS2;HAMP;PTMA;CFB;TPT1
apratoxin A 6326668 human GSE2742 sample 3071	19/211	2.35579e-16	8.50335e-16	0	0	13.4399	483.628	RPL41;RPLP0;RPL7;ACTG1;EEF1A1;RPS17;UBB;RPS18;FTH1;UBC;RPL37A;PABPC1;RPS2;FAU;RPS27A;GAPDH;TPT1;RPS23;RPL19
4-Hydroxynonenal 5283344 human GSE2397 sample 3080	20/246	2.68108e-16	9.63911e-16	0	0	12.1344	435.082	RPS9;RPL41;RPS7;RPS8;RPL12;RPL11;RPL36A;BST2;RPL7A;UBB;RPS18;RPS29;FTH1;PSAP;RPS3;RPL14;RPL26;RPS2;RPS21;GAPDH
motexafin gadolinium DB05428 human GSE2964 sample 3591	21/282	2.70667e-16	9.69266e-16	0	0	11.1146	398.411	RPL4;HSPA8;RPS9;RPL3;HSP90AB1;RPL32;RPS7;RPS8;RPS5;RPL13A;RPL8;EEF2;RPL6;ACTB;ACTG1;RPS29;UBC;RPL14;B2M;GAPDH;RPS23
MLN4924 73014187 human GSE30531 sample 2645	20/253	4.62512e-16	1.64975e-15	0	0	11.7987	416.611	HSPA8;RPL41;HSP90AB1;RPL32;RPS8;RPS5;RPL12;RPLP0;RPL11;RPL13A;RPL23A;ACTG1;RPS17;RPS18;FTH1;RPLP2;RPS2;GAPDH;RPS12;RPL19
cisplatin DB00515 mouse GSE6206 sample 2692	21/293	5.86241e-16	2.08288e-15	0	0	10.6974	375.187	IFITM3;RPL4;RPS9;GPX1;RPS5;LYZ2;RPLP1;RPLP0;RPL13A;MT2;MT1;RPL6;RPS14;FTH1;UBC;RPS27RT;RPS3;RPL26;PTMA;RPS23;RPL19
levetiracetam DB01202 rat GSE2880 sample 2777	24/419	6.48793e-16	2.29612e-15	0	0	8.54914	298.976	RPL4;RPL3;HSP90AB1;RPS7;RPS8;RPS5;RPL12;RPS6;RPLP0;RPL36A;RPL8;RPL6;RPL7;HSP90B1;RPS4X;EEF1G;RPL7A;UBB;RPS11;RPS27A;RPL17;RPS24;RPS12;RPL19
Phosgene 6371 mouse GSE2565 sample 3610	20/261	8.45236e-16	2.9797e-15	0	0	11.4371	396.945	IFITM3;HSPA8;HSP90AB1;GPX1;RPS8;HP;RPL13A;MT2;MT1;RPS14;FTL1;FTH1;UBC;RPL36;RPL26;PABPC1;RPS2;PTMA;TPT1;RPS23
4-Hydroxynonenal 5283344 human GSE2397 sample 3083	20/263	9.79587e-16	3.43994e-15	0	0	11.3501	392.252	HSPA8;RPL3;RPL12;RPS6;RPLP0;RPL36A;RPL13A;RPL23A;HSP90B1;RPS17;UBB;RPS18;FTH1;UBC;PSAP;RPL37A;RPL26;RPS11;TPT1;RPL19
Promyelocytic leukemia DB00755 human GSE5007 sample 2461	21/309	1.70566e-15	5.96651e-15	0	0	10.1435	344.927	IFITM3;RPS9;RPL41;GPX1;RPLP1;RPLP0;HP;ACTB;ACTG1;EEF1A1;UBB;FTH1;TMSB4X;UBC;PSAP;MYH9;RPS11;RPS27A;B2M;RPS24;TPT1
Arachidonic acid DB04557 human GSE3737 sample 3171	23/395	1.95751e-15	6.82117e-15	0	0	8.69072	294.33	RPL4;HSPA8;RPL3;HSP90AB1;RPS7;RPS8;RPL12;RPS6;RPLP0;RPL36A;RPSA;RPL8;RPL6;ACTG1;RPS4X;EEF1G;RPL7A;RPS3;PABPC1;RPS2;GAPDH;RPS23;RPL19
tretinoin DB00755 mouse GSE484 sample 2826	21/314	2.35142e-15	8.16238e-15	0	0	9.98194	336.229	RPL5;RPS5;RPLP1;RPS6;RPLP0;MT2;MT1;RPL8;RPS17;UBB;FTH1;PSAP;RPL37A;RPL36;RPS3;RPL13;APOE;RPS2;RPS11;S100A8;TPT1
d-serine 71077 rat GSE10748 sample 3391	22/357	2.63078e-15	9.09728e-15	0	0	9.19771	308.781	RPL3;RPL32;RPS7;RPS8;RPS5;RPL11;RPL6;RPL7;RPS15;RPS4X;RPS14;RPS17;RPS29;FTH1;UBC;PSAP;RPL26;RPS2;RPS27A;GAPDH;RPL17;RPS23
Bisphenol A 6623 human GSE17624 sample 2661	20/282	3.74782e-15	1.29108e-14	0	0	10.5854	351.621	RPL4;RPL41;HSP90AB1;RPL32;RPS7;RPL12;RPL36A;RPL8;HSP90B1;RPS4X;RPS29;FTH1;RPS3;RPS2;RPS11;PTMA;GAPDH;RPS24;RPS12;RPL19
Lapatinib DB01259 human GSE38376 sample 3252	20/287	5.24617e-15	1.80039e-14	0	0	10.401	341.997	RPL41;RPL3;RPLP1;RPS6;RPL13A;RPSA;RPL7;RPS15;EEF1G;RPS17;RPS29;RPL37A;RPLP2;RPL38;FAU;RPS11;RPS27A;B2M;RPS12;RPS23
Telapristone Acetate 9806190 human GSE67561 sample 3695	20/289	5.9906e-15	2.04811e-14	0	0	10.329	338.259	RPL4;RPS9;RPL41;RPS8;RPLP0;RPL11;RPL8;EEF2;ACTB;ACTG1;EEF1A1;RPL7A;RPS17;RPLP2;RPL38;APOE;FAU;RPS11;TPT1;RPS12
Etanercept DB00005 human GSE7524 sample 3295	18/221	8.90205e-15	3.03205e-14	0	0	12.1564	393.29	ORM1;GPX1;RPLP1;RPL8;ACTB;ACTG1;BST2;RPS18;FTH1;TMSB4X;UBC;PSAP;RPL38;B2M;S100A9;GAPDH;S100A8;TPT1
Triiodothyronine-[13C6] hydrochloride (T3 thyronine) 53442265 human GSE29159 sample 3044	20/300	1.22075e-14	4.14231e-14	0	0	9.95025	318.773	FGB;HSPA8;FGA;ORM1;RPL3;AMBP;RPLP0;FGG;ORM2;ACTG1;C3;RPS4X;TTR;UBB;UBC;APOC1;APOE;GAPDH;RPS24;RPL19
decitabine DB01262 human GSE29077 sample 2540	20/300	1.22075e-14	4.12686e-14	0	0	9.95025	318.773	RPL41;GPX1;RPL32;RPS5;RPLP0;RPL36A;RPL23A;RPS15;RPL7A;RPS17;UBB;RPS18;PSAP;APOC1;RPLP2;RPS2;FAU;RPS11;B2M;RPS12
SODIUM ARSENITE 443495 mouse GSE11056 sample 3355	20/302	1.38505e-14	4.6649e-14	0	0	9.88435	315.414	FGB;FGA;WFDC21;ORM1;AHSG;SERPINA3K;APOA2;APOA1;MT2;MT1;SERPINA1A;HPX;SERPINA1C;TTR;ALB;LCN2;SAA1;HIST1H4H;S100A9;S100A8
Rapamycin DB00877 human GSE5824 sample 2459	22/387	1.38913e-14	4.6613e-14	0	0	8.48471	270.726	RPL4;RPL5;RPS9;RPL3;RPL32;RPS7;RPS8;RPL12;RPS6;RPL13A;RPL23A;CCNB1IP1;RPS15;RPL7A;RPS18;UBC;RPL37A;RPS3;RPL14;PTMA;RPL17;RPL19
acrylamide 6579 rat GSE29004 sample 3109	22/388	1.46463e-14	4.8965e-14	0	0	8.46284	269.58	IFITM3;RPL4;GPX1;RPS5;LYZ2;RPL12;RPL36A;RPL13A;HSP90B1;RPS4X;RPS14;FTL1;RPS18;UBC;RPS3;MYH9;RPL38;RPL26;RPS2;RPS11;RPS21;TPT1
troglitazone 5591 mouse GSE1458 sample 2589	20/305	1.67096e-14	5.56578e-14	0	0	9.78713	310.475	RPL41;MT2;RPL23A;MT1;RPL8;ACTG1;HSP90B1;EEF1A1;RPL7A;UBB;UBC;RPS27RT;RPL37A;RPL36;RPS3;RPL13;RPS2;GAPDH;H2-D1;RPL19
amoxicillin DB01060 rat GSE2354 sample 2676	18/230	1.78754e-14	5.93227e-14	0	0	11.6807	369.758	RPL5;RPL3;RPL32;RPS8;RPS6;APOA1;ACTB;EEF1A1;RPS4X;FABP1;RPS14;UBB;RPS29;FTH1;TMSB4X;FAU;B2M;TPT1
SODIUM ARSENITE 443495 mouse GSE11056 sample 3354	19/268	1.9395e-14	6.41309e-14	0	0	10.5814	334.095	FGB;FGA;ORM1;AMBP;AHSG;FGG;SERPINA3K;APOA2;APOA1;SERPINA1A;HPX;SERPINA1C;TTR;ALB;SAA1;SAA2;GC;S100A9;S100A8
ARSENIC 5359596 human GSE6907 sample 3529	22/394	2.00556e-14	6.6074e-14	0	0	8.33396	262.855	IFITM3;RPL5;RPS9;ORM1;HSP90AB1;RPL32;RPS5;RPL6;ACTB;RPS15;EEF1A1;RPS4X;RPL7A;RPS17;UBB;FTH1;RPL14;RPLP2;RPL13;FAU;HAMP;GAPDH
methylprednisolone 6741 rat GSE490 sample 3670	19/270	2.2202e-14	7.28805e-14	0	0	10.503	330.201	IFITM3;RPL5;HSPA8;RPS9;HSP90AB1;LYZ2;RPLP0;HP;RPS14;RPL7A;TMSB4X;UBC;PSAP;APOE;RPS11;RPS21;GAPDH;RPL17;RPL19
IFN-alphacon1 DB05258 human GSE5542 sample 2474	20/313	2.72874e-14	8.92506e-14	0	0	9.53698	297.862	IFITM3;HSPA8;RPLP1;RPL23A;RPL8;ACTG1;HSP90B1;BST2;RPS4X;RPS29;TMSB4X;PSAP;RPL36;RPLP2;RPS2;FAU;RPS27A;B2M;PTMA;RPL19
simvastatin 54454 mouse GSE1871 sample 3618	22/402	3.02421e-14	9.85587e-14	0	0	8.16811	254.27	IFITM3;HSPA8;CD74;GPX1;RPL32;RPL12;H2-K1;RPL36A;MT2;HBA-A2;RPL8;ACTG1;C3;RPL7A;LCN2;PABPC1;RPS2;S100A9;PTMA;GAPDH;S100A8;H2-D1
rituximab DB00073 human GSE24742 sample 2514	19/277	3.53245e-14	1.1471e-13	0	0	10.2376	317.102	RPL5;RPL41;RPLP1;RPS6;RPL6;ACTB;EEF1A1;RPS4X;FTH1;RPL37A;RPL36;RPS11;B2M;PTMA;CFB;RPS24;TPT1;RPS23;RPL19
Bisphenol A 6623 human GSE17624 sample 2654	20/319	3.90591e-14	1.26384e-13	0	0	9.3576	288.904	RPS8;RPS5;RPS6;RPL11;RPSA;RPL23A;RPL6;ACTG1;EEF1G;RPS17;RPS18;RPS29;TMSB4X;UBC;PSAP;RPL37A;RPS3;RPL26;B2M;RPS23
methylprednisolone 6741 rat GSE490 sample 3669	18/241	4.02555e-14	1.29792e-13	0	0	11.1476	343.831	IFITM3;FGA;ORM1;LYZ2;FGG;HP;C3;HPX;FTL1;RPS29;FTH1;UBC;PSAP;LCN2;GAPDH;S100A8;CFB;TPT1
Triiodothyronine-[13C6] hydrochloride (T3 thyronine) 53442265 human GSE29159 sample 3043	20/320	4.14344e-14	1.33119e-13	0	0	9.32836	287.45	FGB;HSPA8;FGA;ORM1;HSP90AB1;AHSG;FGG;HP;APOA2;EEF2;ORM2;ACTB;C3;UBB;UBC;APOC1;APOE;RPS27A;B2M;HAMP
apratoxin A 6326668 human GSE2742 sample 3070	18/246	5.74358e-14	1.83876e-13	0	0	10.921	332.961	RPL41;ACTB;RPL7;ACTG1;EEF1A1;RPS4X;UBB;RPS18;FTH1;UBC;PABPC1;RPS2;FAU;RPS27A;B2M;GAPDH;TPT1;RPS23
methylprednisolone 6741 rat GSE490 sample 3664	18/246	5.74358e-14	1.83228e-13	0	0	10.921	332.961	IFITM3;RPS9;RPS8;LYZ2;RPLP0;HP;RPL6;RPS14;RPL7A;UBB;UBC;PSAP;RPL36;LCN2;RPS3;B2M;RPL17;CFB
diclofenac DB00586 human GSE28185 sample 3057	20/327	6.22781e-14	1.97979e-13	0	0	9.12867	277.577	IFITM3;RPL41;ORM1;GPX1;RPS8;RPL12;EEF2;ACTG1;RPS29;FTH1;TMSB4X;UBC;PSAP;APOC1;RPS3;RPS2;B2M;S100A9;S100A8;RPS12
colistin DB00803 mouse GSE46410 sample 2480	19/291	8.60594e-14	2.72622e-13	0	0	9.74509	293.169	HSPA8;HIST2H2AA2;RPS9;RPS7;RPLP1;MT1;HSP90B1;EEF1A1;RPS4X;SERPINA1B;SERPINA1D;TTR;UBB;RPS29;PSAP;LCN2;RPL38;RPS2;RPS12
IFN-gamma1b DB00033 human GSE5542 sample 2476	20/334	9.26997e-14	2.92634e-13	0	0	8.93735	268.205	IFITM3;RPS9;GPX1;RPL12;RPL11;ACTG1;EEF1A1;C3;RPS14;UBC;RPL36;RPL38;RPL26;FAU;RPS11;B2M;PTMA;RPL17;TPT1;RPS12
bicalutamide DB01128 human GSE7708 sample 3088	19/298	1.31942e-13	4.15069e-13	0	0	9.51618	282.216	RPL4;RPS9;RPL41;RPL3;RPL32;RPS5;RPLP0;RPSA;RPL8;CCNB1IP1;HSP90B1;RPS15;RPL7A;RPL37A;RPL38;RPL26;PTMA;RPL17;RPS23
Argyrin A 24978550 human GSE8565 sample 3054	18/259	1.39512e-13	4.37364e-13	0	0	10.3728	307.043	IFITM3;RPS9;RPL12;RPS6;RPL36A;RPL13A;RPL23A;RPL8;EEF2;CCNB1IP1;ACTG1;FTH1;UBC;PSAP;RPL26;RPS11;B2M;RPL17
Coenzyme Q10 5281915 mouse GSE15129 sample 3452	17/228	2.21084e-13	6.90696e-13	0	0	11.1286	324.289	GPX1;RPS7;RPLP1;RPL12;TRF;MT2;MT1;ACTB;RPL7;EEF1A1;RPS29;FTH1;RPS27RT;RPL14;B2M;GAPDH;TPT1
sangivamycin (NSC 65346) 14978 human GSE13477 sample 2504	18/270	2.84552e-13	8.85925e-13	0	0	9.95025	287.441	RPL32;RPL36A;RPL23A;RPL6;RPL7;ACTG1;RPS15;RPS29;FTH1;TMSB4X;RPL37A;RPL36;RPL38;RPL26;FAU;RPS27A;RPS23;RPL19
ARC (NSC 188491) 302576 human GSE13477 sample 2503	18/271	3.03108e-13	9.40466e-13	0	0	9.91353	285.754	RPL41;RPL36A;RPL23A;RPL6;ACTB;CCNB1IP1;ACTG1;RPS15;RPS18;RPS29;FTH1;TMSB4X;UBC;RPL36;FAU;RPS27A;RPS21;RPL19
MLN4924 73014187 human GSE30531 sample 2647	18/273	3.4366e-13	1.06265e-12	0	0	9.84091	282.425	RPL41;RPL32;RPS5;RPL12;RPS6;RPSA;RPL23A;EEF2;ACTB;CCNB1IP1;ACTG1;EEF1A1;RPS18;FTH1;RPS2;FAU;RPS21;RPL19
methylprednisolone 6741 rat GSE490 sample 3665	18/274	3.65785e-13	1.12721e-12	0	0	9.80499	280.783	LYZ2;RPS6;HP;RPL8;RPS14;HPX;UBB;RPS29;FTH1;UBC;PSAP;LCN2;RPS2;RPS11;RPL17;TPT1;RPS12;RPL19
tamoxifen DB00675 human GSE4025 sample 2820	20/361	3.95272e-13	1.21395e-12	0	0	8.2689	236.153	RPL41;RPL32;RPL36A;RPSA;RPL23A;ACTB;ACTG1;HSP90B1;RPS17;RPS29;RPL38;RPS2;FAU;RPS27A;B2M;RPS21;PTMA;GAPDH;RPS12;RPS23
methylprednisolone 6741 rat GSE490 sample 3663	17/237	4.15828e-13	1.27277e-12	0	0	10.706	305.211	IFITM3;LYZ2;RPS6;RPLP0;RPL6;HSP90B1;RPS14;UBB;FTH1;UBC;PSAP;LCN2;RPS3;B2M;RPL17;CFB;RPS12
letrozole 3902 human GSE5462 sample 3097	18/277	4.40407e-13	1.34346e-12	0	0	9.6988	275.941	CD74;RPS9;RPL3;RPLP1;RPL11;RPL13A;RPS15;C3;RPS14;UBB;FTH1;TMSB4X;UBC;PSAP;APOC1;RPS27A;TPT1;RPL19
methylprednisolone 6741 rat GSE490 sample 3661	18/277	4.40407e-13	1.33896e-12	0	0	9.6988	275.941	IFITM3;RPS9;HSP90AB1;RPS7;RPLP0;EEF2;HSP90B1;RPS14;RPL7A;UBB;PSAP;RPL36;LCN2;RPS3;FAU;GAPDH;RPL17;S100A8
Caerulein 16132921 mouse GSE3644 sample 3585	21/412	4.86785e-13	1.47501e-12	0	0	7.60759	215.683	HSPA8;HSP90AB1;RPS8;RPL12;RPLP0;MT2;MT1;RPL8;EEF2;ACTB;ACTG1;EEF1A1;FTL1;RPS3A1;TMSB4X;UBC;MYH9;RPL13;RPS2;RPS11;PTMA
valproic acid DB00313 mouse GSE9247 sample 2838	19/324	5.87454e-13	1.77411e-12	0	0	8.75253	246.497	RPS7;MT2;RPL23A;MT1;RPS15;RPS14;FTL1;TMSB4X;RPS27RT;RPL37A;RPLP2;RPL38;FAU;RPS11;B2M;PTMA;GAPDH;H2-D1;RPS24
MLN4924 73014187 human GSE30531 sample 2644	19/325	6.20486e-13	1.86764e-12	0	0	8.7256	245.262	HSPA8;RPS9;RPL41;RPL3;HSP90AB1;RPLP0;RPL13A;RPL23A;RPL8;RPS17;RPS18;FTH1;RPS3;RPL13;PABPC1;RPS2;PTMA;GAPDH;RPS12
ursodeoxycholic acid 31401 mouse GSE21266 sample 2492	18/291	1.01749e-12	3.05248e-12	0	0	9.23219	254.935	HSPA8;CD74;HSP90AB1;RPS8;RPLP0;RPL11;RPL13A;RPSA;MT2;MT1;RPL6;RPL7;HSP90B1;EEF1G;RPL7A;FTL1;RPL38;GAPDH
methylprednisolone 6741 rat GSE490 sample 3672	19/337	1.17899e-12	3.5253e-12	0	0	8.4149	231.127	IFITM3;RPS8;RPS5;LYZ2;RPS6;RPLP0;RPL11;HP;RPS15;RPS14;UBC;PSAP;RPL36;RPLP2;RPS11;GAPDH;RPL17;RPS12;RPL19
phenytoin 1775 rat GSE2880 sample 3034	21/437	1.50688e-12	4.49091e-12	0	0	7.17238	195.239	RPL4;RPL5;RPS9;RPL3;RPL32;RPLP0;RPL36A;RPL13A;RPL23A;RPL6;RPS4X;RPS14;RPS18;TMSB4X;UBC;RPS3;RPL26;RPS27A;RPS21;PTMA;RPL17
cyclophosphamide 2907 mouse GSE2254 sample 3628	19/344	1.69421e-12	5.03263e-12	0	0	8.24367	223.435	IFITM3;HSPA8;RPL41;H2-K1;RPS6;HP;MT2;MT1;ACTG1;EEF1A1;C3;FTH1;PSAP;LCN2;RPS2;B2M;PTMA;H2-D1;RPS23
methoxychlor 4115 mouse GSE23725 sample 3235	19/346	1.87622e-12	5.55509e-12	0	0	8.19601	221.307	HSP90AB1;RPL11;RPSA;MT2;MT1;EEF2;ACTB;HSP90B1;RPS15;RPS14;RPL7A;FTL1;PSAP;RPL14;APOE;RPS2;RPS11;IFI27L2A;GAPDH
Triiodothyronine-[13C6] hydrochloride (T3 thyronine) 53442265 human GSE29159 sample 3047	18/303	2.01306e-12	5.94083e-12	0	0	8.86656	238.789	FGB;RPL5;HSPA8;FGA;RPS9;ORM1;HSP90AB1;FGG;APOA2;RPL8;EEF2;ORM2;EEF1A1;FTH1;UBC;ALB;APOC1;TPT1
2,3,7,8-tetrachlorodibenzo-p-dioxin 10852289 rat GSE48100 sample 3112	18/308	2.6511e-12	7.79837e-12	0	0	8.72262	232.511	RPS9;RPL41;RPL32;RPS8;RPLP1;RPSA;RPL23A;EEF1A1;RPS14;RPL7A;FTL1;UBB;RPS29;RPL13;B2M;RPS21;CFB;RPL19
Caerulein 16132921 mouse GSE3644 sample 3586	20/402	2.86554e-12	8.40188e-12	0	0	7.42556	197.358	IFITM3;HSPA8;HSP90AB1;GPX1;MT2;HBA-A2;MT1;EEF2;ACTB;RPL7;ACTG1;TMSB4X;UBC;RPL37A;LCN2;MYH9;RPL26;GAPDH;RPS12;RPL19
citalopram DB00215 human GSE7036 sample 3292	18/312	3.29235e-12	9.62216e-12	0	0	8.61079	227.664	RPS9;RPL3;HSP90AB1;RPL32;RPS5;RPL12;RPSA;EEF2;EEF1G;UBB;UBC;RPL36;RPLP2;RPL13;RPL26;PABPC1;RPS21;RPL17
ubiquinol 9962735 mouse GSE15129 sample 3453	17/271	3.62202e-12	1.05516e-11	0	0	9.36278	246.653	RPL4;RPL3;RPS7;RPS5;RPLP1;TRF;RPL13A;MT2;HBA-A2;RPL23A;MT1;ACTB;TTR;RPS29;RPL13;B2M;TPT1
Triiodothyronine-[13C6] hydrochloride (T3 thyronine) 53442265 human GSE29159 sample 3042	19/362	4.14595e-12	1.20392e-11	0	0	7.83376	205.314	FGB;HSPA8;FGA;ORM1;AMBP;RPLP1;FGG;APOA2;ORM2;ACTB;C3;UBC;APOC1;RPS3;RPL38;RPL26;APOE;B2M;HAMP
fluoxetine 62857 mouse GSE6476 sample 2618	17/274	4.3196e-12	1.25034e-11	0	0	9.26027	242.321	IFITM3;HSPA8;GPX1;RPLP0;TRF;MT2;MT1;ACTB;ACTG1;EEF1A1;RPL7A;TTR;RPS29;UBC;B2M;GAPDH;TPT1
MEK inhibitor (MEKi -AZD6244) 10127622 human GSE55624 sample 3250	17/275	4.57858e-12	1.32108e-11	0	0	9.22659	240.903	HSPA8;RPL41;RPL32;RPS7;RPSA;RPL23A;ACTB;ACTG1;EEF1A1;RPS18;FTH1;RPL37A;RPL36;MYH9;RPL38;RPS11;RPS23
dexamethasone DB01234 mouse GSE4165 sample 2710	17/277	5.14038e-12	1.47847e-11	0	0	9.15998	238.103	IFITM3;FGB;H2-T23;FGA;FGG;APOA2;TRF;APOA1;HBA-A2;ACTB;C3;TTR;FTH1;UBC;ALB;APOE;B2M
paclitaxel DB01229 human GSE19136 sample 2576	16/240	6.48369e-12	1.85893e-11	0	0	9.95025	256.336	HSPA8;RPS9;RPL41;RPLP0;RPSA;RPL7A;RPS18;RPS29;FTH1;UBC;RPL37A;RPL26;RPS2;RPS27A;RPS12;RPL19
5-Fluorouracil 3385 mouse GSE1559 sample 3636	18/325	6.51703e-12	1.8626e-11	0	0	8.26636	212.913	IFITM3;RPL41;RPS7;RPLP1;RPLP0;RPL13A;RPL23A;RPL8;RPL6;RPL7A;RPS17;UBB;UBC;RPL37A;RPS2;PTMA;RPS23;RPL19
Bisphenol A 6623 human GSE17624 sample 2660	18/325	6.51703e-12	1.85674e-11	0	0	8.26636	212.913	RPL4;RPS9;RPS7;RPS8;RPL11;RPL36A;RPL13A;RPL23A;FTH1;PSAP;RPL37A;LCN2;RPS3;PABPC1;PTMA;RPS24;RPS12;RPL19
Rosiglitazone DB00412 mouse GSE11343 sample 3255	18/326	6.85961e-12	1.94822e-11	0	0	8.241	211.838	IFITM3;CD74;RPS8;LYZ2;RPLP0;RPL6;ACTB;EEF1A1;C3;RPS14;RPL7A;FTH1;LCN2;RPS2;S100A9;PTMA;RPL17;S100A8
methylprednisolone 6741 rat GSE490 sample 3659	17/284	7.6514e-12	2.1663e-11	0	0	8.9342	228.681	IFITM3;HP;HPX;UBB;RPS29;FTH1;TMSB4X;UBC;PSAP;RPL36;LCN2;RPS2;S100A9;GAPDH;RPL17;S100A8;TPT1
Phosgene 6371 mouse GSE2565 sample 3611	16/243	7.82784e-12	2.20935e-11	0	0	9.82741	251.32	HSPA8;H2-T23;HSP90AB1;HP;MT2;MT1;ACTG1;HSP90B1;RPS15;C3;RPS14;FTL1;FTH1;UBC;RPS27RT;FAU
methylprednisolone 6741 rat GSE490 sample 3658	17/293	1.25569e-11	3.5331e-11	0	0	8.65977	217.367	IFITM3;RPS9;RPS8;RPLP0;HP;ACTB;RPS14;RPS17;UBB;UBC;PSAP;RPL36;RPS3;RPLP2;FAU;GAPDH;S100A8
puromycin, EC50, 1 d 439530 human GSE6930 sample 3268	16/251	1.27756e-11	3.5835e-11	0	0	9.51418	238.649	RPL5;HSPA8;RPL41;RPL32;RPLP0;RPL36A;RPSA;RPL23A;RPL6;RPS4X;RPL7A;RPS29;RPL36;RPL14;RPL38;RPS24
mycophenolic acid DB01024 human GSE14630 sample 3302	18/339	1.31416e-11	3.67477e-11	0	0	7.92498	198.562	IFITM3;RPL4;RPL41;RPL12;RPS6;RPL23A;ACTB;BST2;EEF1G;FTH1;TMSB4X;UBC;RPS2;B2M;S100A9;GAPDH;S100A8;RPS24
apratoxin A 6326668 human GSE2742 sample 3068	19/389	1.44845e-11	4.03783e-11	0	0	7.29003	181.944	HSPA8;RPS9;RPL3;HSP90AB1;GPX1;RPL13A;RPSA;RPL8;EEF2;ACTB;ACTG1;EEF1G;UBB;FTH1;UBC;PSAP;MYH9;PABPC1;GAPDH
IFN-alphacon1 DB05258 human GSE5542 sample 2473	18/356	2.94929e-11	8.1965e-11	0	0	7.54654	182.98	IFITM3;HSPA8;GPX1;RPL32;RPL12;RPLP0;RPL11;ACTG1;UBB;FTH1;UBC;RPLP2;RPL13;FAU;B2M;RPS21;PTMA;TPT1
SODIUM BUTYRATE 5222465 mouse GSE4410 sample 3582	17/311	3.2172e-11	8.91372e-11	0	0	8.15856	197.11	HSPA8;RPLP0;RPL11;RPL36A;MT2;MT1;RPL8;RPL7;RPS15;EEF1A1;FTL1;TMSB4X;RPS3;RPS27A;RPS21;TPT1;RPS12
HYPOCHLOROUS ACID 24341 human GSE11630 sample 3202	17/311	3.2172e-11	8.88655e-11	0	0	8.15856	197.11	IFITM3;RPL5;HSPA8;CD74;RPS9;HSP90AB1;RPS8;RPL36A;RPL8;RPL6;RPS15;RPL36;RPLP2;RPL26;FAU;RPS23;RPL19
metoprolol DB00264 human GSE3356 sample 2786	20/469	4.63021e-11	1.27507e-10	0	0	6.36476	151.455	IFITM3;HSPA8;HSP90AB1;RPS7;RPS8;RPS5;RPLP1;RPL11;EEF2;HSP90B1;FTH1;TMSB4X;UBC;PSAP;MYH9;RPL13;RPL26;RPS27A;B2M;RPS23
bexarotene 82146 rat GSE3952 sample 3560	15/239	7.22187e-11	1.98273e-10	0	0	9.36739	218.741	FGB;GPX1;HP;APOA2;FABP1;HPX;RPS18;UBC;ALB;APOC1;RPL26;APOE;FAU;RPS21;GAPDH
lapatinib 208908 human GSE38376 sample 3245	16/282	7.30864e-11	2.00049e-10	0	0	8.4683	197.645	HSPA8;RPL3;HSP90AB1;RPL13A;EEF2;HSP90B1;EEF1G;UBB;PSAP;RPS3;RPLP2;RPS2;FAU;GAPDH;RPS24;RPS12
estradiol 5757 human GSE4668 sample 3061	17/331	8.52981e-11	2.32771e-10	0	0	7.6656	177.726	RPL4;RPL5;HSPA8;RPS8;RPLP1;RPSA;EEF2;ACTB;ACTG1;EEF1G;RPS17;UBC;RPS3;RPL13;PTMA;GAPDH;TPT1
5-Fluorouracil 3385 mouse GSE1559 sample 3639	14/202	8.63335e-11	2.34889e-10	0	0	10.3443	239.707	RPL41;RPLP1;RPL23A;UBB;RPS27RT;RPL36;RPL13;PABPC1;RPS11;GAPDH;RPS24;TPT1;RPS23;RPL19
2,3,7,8-tetrachlorodibenzo-p-dioxin 10852289 rat GSE48100 sample 3111	16/297	1.57427e-10	4.27032e-10	0	0	8.04061	181.493	RPL4;RPS9;RPL41;RPS7;RPS6;RPL13A;EEF2;HSP90B1;RPS17;UBB;RPS29;FTH1;PSAP;RPS27A;B2M;RPL19
4-Hydroxytamoxifen 449459 human GSE26298 sample 3239	18/401	2.05533e-10	5.5586e-10	0	0	6.69967	149.439	IFITM3;RPL4;RPS9;RPS7;RPS8;RPS5;RPL36A;RPL13A;RPSA;RPL8;RPL6;RPL36;RPS3;RPL14;RPL26;FAU;RPL17;RPL19
lapatinib DB01259 human GSE16179 sample 2580	20/511	2.11083e-10	5.69169e-10	0	0	5.84163	130.144	RPL4;RPL5;RPS8;RPL11;RPL36A;RPL13A;RPL8;EEF2;RPL6;CCNB1IP1;HSP90B1;TMSB4X;PSAP;RPL14;RPL38;RPL26;RPS27A;B2M;RPS21;PTMA
rosiglitazone DB00412 mouse GSE11343 sample 2815	17/352	2.2134e-10	5.95056e-10	0	0	7.20828	160.25	CD74;RPS9;HSP90AB1;RPL32;RPLP1;TRF;H2-AA;RPL6;ACTB;RPS14;FTL1;APOC1;RPLP2;APOE;RPS2;IFI27L2A;PTMA
estradiol 5757 human GSE16683 sample 3394	17/354	2.4155e-10	6.47468e-10	0	0	7.16755	158.718	IFITM3;RPL3;HSP90AB1;RPL36A;RPL8;EEF2;ACTB;ACTG1;RPS17;RPS18;UBC;PSAP;RPL36;MYH9;FAU;GAPDH;TPT1
quercetin 5280343 human GSE13899 sample 3182	16/307	2.56289e-10	6.8495e-10	0	0	7.7787	171.79	IFITM3;HSPA8;GPX1;RPS6;RPL11;RPL6;BST2;UBB;FTH1;PSAP;RPS3;PABPC1;B2M;S100A9;PTMA;RPS24
Rosiglitazone 77999 mouse GSE7193 sample 3091	15/263	2.76361e-10	7.3642e-10	0	0	8.51257	187.356	RPL5;RPL41;GPX1;RPL32;RPS7;RPLP0;RPL11;ACTB;ACTG1;EEF1A1;UBC;RPL26;B2M;GAPDH;TPT1
isoflurane 3763 rat GSE6433 sample 3653	16/310	2.95589e-10	7.85348e-10	0	0	7.70342	169.029	RPL13A;RPSA;ACTB;EEF1A1;EEF1G;RPL7A;TTR;RPS18;RPS29;FTH1;TMSB4X;UBC;PTMA;TPT1;RPS12;RPL19
estradiol 5757 mouse GSE2195 sample 3625	17/363	3.55428e-10	9.41573e-10	0	0	6.98984	152.083	IFITM3;RPL5;RPS7;LYZ2;H2-K1;MT2;MT1;EEF2;C3;UBB;TMSB4X;RPS27RT;LCN2;APOE;B2M;H2-D1;RPL19
decitabine DB01262 human GSE29077 sample 2548	16/316	3.9135e-10	1.03371e-09	0	0	7.55715	163.699	GPX1;RPS5;RPL36A;RPL23A;RPL8;RPS15;RPS18;RPS29;TMSB4X;UBC;RPS3;RPLP2;FAU;TPT1;RPS12;RPL19
trastuzumab DB00072 human GSE31432 sample 3123	16/320	4.7027e-10	1.23856e-09	0	0	7.46269	160.281	RPS9;RPS5;EEF2;ACTB;ACTG1;EEF1A1;TMSB4X;UBC;PSAP;RPL36;MYH9;RPL38;RPS2;RPS11;RPL17;RPL19
cytarabine, 2xEC50, 5 d 6253 human GSE6930 sample 3424	15/276	5.40087e-10	1.41832e-09	0	0	8.11162	173.096	RPS5;RPLP1;RPLP0;EEF2;EEF1A1;FTH1;TMSB4X;UBC;PSAP;RPS27A;B2M;RPS21;RPS24;TPT1;RPS23
MLN4924 73014187 human GSE30531 sample 2643	16/324	5.63624e-10	1.47585e-09	0	0	7.37055	156.968	RPL4;HSPA8;RPL3;RPL36A;RPL8;RPS15;RPS4X;RPS29;FTH1;RPL37A;RPL36;RPL38;RPL26;RPS11;B2M;RPL19
rosiglitazone 77999 rat GSE5509 sample 3567	15/279	6.27184e-10	1.63755e-09	0	0	8.02439	170.035	FGB;FGA;CD74;WFDC21;ORM1;LYZ2;FGG;HP;APOA1;HSP90B1;EEF1A1;HPX;LCN2;HAMP;PTMA
foretinib 42642645 human GSE16179 sample 2582	18/432	6.7934e-10	1.76863e-09	0	0	6.21891	131.28	HSPA8;RPL3;HSP90AB1;RPS5;RPLP0;RPL11;EEF2;ACTB;ACTG1;RPS4X;EEF1G;RPL7A;FTH1;TMSB4X;PSAP;RPL26;B2M;GAPDH
ubiquinol 9962735 mouse GSE15129 sample 3455	16/331	7.69049e-10	1.99644e-09	0	0	7.21468	151.406	HSPA8;HSP90AB1;LYZ2;RPLP0;MT2;MT1;EEF2;HSP90B1;RPS17;FTL1;TMSB4X;UBC;RPS27RT;RPLP2;RPS11;TPT1
5-Fluorouracil 3385 mouse GSE1559 sample 3638	16/332	8.03463e-10	2.07982e-09	0	0	7.19295	150.635	RPL41;RPLP1;RPS6;RPLP0;RPL13A;RPL23A;RPL8;ACTB;RPL7A;RPS17;RPS27RT;RPL37A;PABPC1;RPS27A;GAPDH;RPS23
fenretinide 5288209 rat GSE3952 sample 3559	12/160	8.24091e-10	2.12714e-09	0	0	11.194	234.143	C3;HPX;ORM1;AMBP;UBC;HP;APOA2;RPL26;APOE;GC;RPS21;CFB
HYPOCHLOROUS ACID 24341 human GSE11630 sample 3197	17/385	8.73463e-10	2.24817e-09	0	0	6.59042	137.467	RPL5;HSPA8;RPS9;GPX1;RPS8;RPLP1;EEF2;RPL6;RPL7;RPS4X;TMSB4X;PSAP;RPS27A;B2M;S100A9;S100A8;CFB
tibolone 444008 human GSE12446 sample 3204	15/287	9.26217e-10	2.3772e-09	0	0	7.80072	162.254	IFITM3;RPL41;RPLP0;RPL36A;EEF1A1;C3;UBB;RPS18;FTH1;TMSB4X;UBC;RPS2;B2M;GAPDH;TPT1
estradiol DB00783 human GSE1153 sample 2734	17/388	9.82819e-10	2.51535e-09	0	0	6.53947	135.632	HSPA8;RPL41;RPL3;HSP90AB1;RPS6;RPL11;RPL36A;ACTB;HSP90B1;UBC;PSAP;MYH9;RPS27A;B2M;PTMA;RPS24;RPS23
alpha-Tocopherol 14985 mouse GSE8146 sample 3478	12/164	1.09502e-09	2.79461e-09	0	0	10.921	225.328	EEF1A1;HSPA8;RPL41;HSP90AB1;PSAP;RPS27RT;RPL37A;EEF2;GAPDH;HSP90B1;RPS23;RPL19
Bisphenol A 6623 human GSE17624 sample 2657	17/392	1.14832e-09	2.92241e-09	0	0	6.47274	133.241	RPL5;HSPA8;RPS9;HSP90AB1;GPX1;RPS7;RPS8;RPS5;RPLP1;RPL36A;RPL6;HSP90B1;FTH1;RPS3;B2M;PTMA;RPS24
neocarzinostatin 5282473 human GSE1676 sample 3113	15/299	1.62477e-09	4.12338e-09	0	0	7.48765	151.534	RPL41;RPL32;RPS7;RPS8;RPS5;RPL23A;RPL6;CCNB1IP1;UBB;RPS29;RPL36;PABPC1;B2M;RPS24;RPL19
levetiracetam 5284583 rat GSE2880 sample 2671	15/303	1.94831e-09	4.93064e-09	0	0	7.3888	148.192	HSPA8;RPL32;RPS7;RPL13A;ACTB;RPS14;RPS17;TTR;TMSB4X;UBC;PSAP;RPL26;RPS27A;RPS21;RPL17
SODIUM BUTYRATE 5222465 mouse GSE4410 sample 3584	14/257	2.03782e-09	5.14279e-09	0	0	8.13055	162.704	H2-K1;RPLP0;MT2;MT1;EEF2;FTL1;FTH1;TMSB4X;RPLP2;B2M;H2-D1;RPS24;TPT1;RPS12
Lipopolysaccharide 11970143 mouse GSE2002 sample 3603	14/257	2.03782e-09	5.12851e-09	0	0	8.13055	162.704	H2-T23;H2-K1;MT2;MT1;ACTG1;C3;BST2;FTL1;UBC;LCN2;FAU;IFI27L2A;B2M;H2-D1
NVP-TNKS656 27924 human GSE55624 sample 3249	14/260	2.36707e-09	5.94063e-09	0	0	8.03674	159.623	RPL4;HSPA8;RPL41;RPL11;RPSA;RPL23A;RPL8;ACTB;ACTG1;RPS18;RPL37A;FAU;RPS11;PTMA
d-serine 71077 rat GSE10748 sample 3390	17/414	2.61752e-09	6.55102e-09	0	0	6.12878	121.111	RPL4;RPL41;RPS5;LYZ2;RPL11;RPL6;ACTB;HSP90B1;RPS14;TTR;RPS29;FTH1;PSAP;RPS3;RPS2;S100A9;GAPDH
alpha-Tocopherol 14985 mouse GSE8150 sample 3477	15/314	3.16585e-09	7.90154e-09	0	0	7.12996	139.539	RPL32;RPL12;RPL11;HBA-A2;RPL6;ACTB;EEF1A1;RPS14;TTR;RPS29;FTH1;APOE;RPS21;GAPDH;RPS23
dexamethasone DB01234 mouse GSE11056 sample 3358	14/272	4.22734e-09	1.05219e-08	0	0	7.68218	148.125	FGB;FGA;ORM1;AHSG;SERPINA3K;APOA2;APOA1;MT2;SERPINA1A;HPX;SERPINA1C;TTR;ALB;GC
Androstanolone 10635 human GSE7868 sample 3410	15/322	4.45169e-09	1.10499e-08	0	0	6.95281	133.702	RPS8;RPS5;RPLP0;RPSA;RPL7A;RPS29;UBC;RPS3;RPL38;RPL26;PABPC1;RPS2;RPS11;B2M;RPS23
aldosterone 5839 mouse GSE434 sample 3655	15/324	4.84025e-09	1.19816e-08	0	0	6.90989	132.299	IFITM3;RPL41;RPS7;RPS6;MT2;RPL8;RPL6;EEF1A1;RPL7A;FTH1;UBC;LCN2;PABPC1;RPS27A;B2M
methylprednisolone 6741 rat GSE490 sample 3673	14/279	5.85009e-09	1.44419e-08	0	0	7.48943	141.976	GPX1;RPLP0;RPL8;RPL6;ACTG1;RPS15;RPL7A;UBB;RPL36;RPS3;RPL14;RPLP2;RPS11;GAPDH
3,3',4,4'-Tetrachlorobiphenyl 36187 human GSE6878 sample 3273	14/288	8.76387e-09	2.15763e-08	0	0	7.25539	134.607	IFITM3;RPL4;AMBP;AHSG;RPL12;EEF2;CCNB1IP1;HSP90B1;C3;FTH1;UBC;RPL26;PABPC1;RPS11
Retinoic acid 444795 mouse GSE1588 sample 3634	15/341	9.62977e-09	2.36438e-08	0	0	6.56541	121.187	RPL5;RPL41;RPLP1;RPLP0;MT2;RPL6;HSP90B1;EEF1A1;RPS17;RPS3A1;TMSB4X;PABPC1;RPS27A;GAPDH;TPT1
Mehp 20393 rat GSE4514 sample 3578	14/293	1.09018e-08	2.66947e-08	0	0	7.13158	130.753	HSPA8;RPS6;RPL8;ACTB;ACTG1;EEF1A1;RPS4X;UBB;TMSB4X;UBC;PSAP;GAPDH;TPT1;RPS23
atorvastatin DB01076 human GSE2450 sample 2484	15/350	1.36401e-08	3.33099e-08	0	0	6.39659	115.844	RPL41;RPLP1;RPSA;RPL23A;RPL7A;RPS18;RPS29;PSAP;RPL37A;APOC1;RPL36;RPL14;RPL38;FAU;RPS21
Mehp 20393 rat GSE4514 sample 3580	14/306	1.88567e-08	4.59252e-08	0	0	6.8286	121.456	IFITM3;HSPA8;LYZ2;RPS6;RPL8;ACTB;ACTG1;HSP90B1;UBB;FTH1;PABPC1;S100A9;HAMP;PTMA
estradiol 5757 mouse GSE2195 sample 3624	14/307	1.96464e-08	4.77202e-08	0	0	6.80636	120.781	IFITM3;H2-K1;MT2;MT1;C3;UBB;TMSB4X;RPS27RT;LCN2;PABPC1;IFI27L2A;B2M;GAPDH;H2-D1
Bisphenol A 6623 human GSE17624 sample 2662	14/313	2.50487e-08	6.06794e-08	0	0	6.67589	116.844	RPL4;RPL5;HSP90AB1;RPL11;RPL8;RPL7;ACTG1;RPS4X;TMSB4X;UBC;RPL37A;RPL38;PABPC1;RPS2
dexamethasone DB01234 mouse GSE7683 sample 2712	13/268	3.14093e-08	7.58849e-08	0	0	7.23992	125.078	RPL4;RPL3;RPLP0;MT2;MT1;RPL8;RPL6;ACTG1;EEF1A1;FTH1;LCN2;RPS2;RPS11
Bisphenol A 6623 human GSE17624 sample 2653	15/377	3.65059e-08	8.79636e-08	0	0	5.93848	101.701	RPL3;HSP90AB1;RPL32;RPLP0;RPL11;RPL23A;ACTB;RPS17;RPS18;FTH1;TMSB4X;UBC;PSAP;PTMA;GAPDH
lipopolysaccharide 11970143 human GSE40885 sample 2475	14/325	4.00754e-08	9.63086e-08	0	0	6.42939	109.509	IFITM3;RPL32;RPS8;ACTB;ACTG1;C3;RPS29;FTH1;TMSB4X;UBC;RPS3;S100A8;CFB;RPS12
d-serine 71077 rat GSE10748 sample 3388	16/443	4.76981e-08	1.14324e-07	0	0	5.39065	90.8777	RPL4;RPL3;RPS5;RPLP0;RPL11;RPL6;EEF1A1;RPS4X;EEF1G;RPS14;FTL1;PSAP;RPS3;RPS2;GAPDH;RPL17
methylprednisolone 6741 rat GSE490 sample 3660	13/278	4.83066e-08	1.15477e-07	0	0	6.97949	117.574	RPS5;RPL11;HSP90B1;RPS14;UBB;RPS29;FTH1;TMSB4X;RPL36;RPS3;RPLP2;GAPDH;RPL17
nicotinamide riboside 439924 mouse GSE62194 sample 3471	12/230	4.92116e-08	1.17331e-07	0	0	7.78715	131.035	RPL41;TTR;UBB;FTH1;PSAP;RPL37A;LCN2;TRF;HBB-BT;MT1;FAU;RPS21
phenytoin 1775 rat GSE2880 sample 3033	15/389	5.5069e-08	1.30951e-07	0	0	5.75529	96.1977	HSP90AB1;RPL32;RPS7;RPS8;RPS6;EEF2;HSP90B1;RPS17;RPS29;RPS3;RPL26;RPS21;RPL17;RPS12;RPL19
palmitic acid 985 mouse GSE6766 sample 3553	13/286	6.73032e-08	1.59625e-07	0	0	6.78426	112.036	HSPA8;HSP90AB1;RPLP0;MT2;MT1;HSP90B1;EEF1A1;RPS14;FTL1;FTH1;UBC;RPS2;GAPDH
HYPOCHLOROUS ACID 24341 human GSE11630 sample 3199	15/396	6.95117e-08	1.64432e-07	0	0	5.65355	93.1805	RPL5;RPS9;GPX1;RPS8;RPS5;RPL36A;RPL6;FTH1;PSAP;RPL36;RPL13;FAU;RPS27A;S100A8;CFB
rosiglitazone DB00412 rat GSE7193 sample 2811	13/289	7.60051e-08	1.79325e-07	0	0	6.71384	110.056	RPL5;RPL41;RPL32;RPS7;RPS6;RPL11;RPL23A;ACTG1;EEF1A1;RPS14;RPL14;RPL26;FAU
MT19c compound SID 134222379 human GSE23616 sample 3352	13/291	8.23557e-08	1.93803e-07	0	0	6.66769	108.765	RPL5;RPS8;RPL36A;RPL6;HSP90B1;EEF1A1;RPS17;RPL26;RPS11;RPS27A;B2M;TPT1;RPL19
pioglitazone DB01132 rat GSE20219 sample 2794	13/292	8.57067e-08	2.01166e-07	0	0	6.64486	108.127	HSPA8;CD74;RPL41;RPL12;RPL11;ACTB;ACTG1;C3;TTR;UBB;UBC;GAPDH;TPT1
2,3,7,8-tetrachlorodibenzo-p-dioxin 10852289 mouse GSE2812 sample 3601	15/405	9.31139e-08	2.17988e-07	0	0	5.52792	89.4939	RPL5;MT2;MT1;RPL8;EEF2;RPL6;ACTB;ACTG1;RPS17;FTH1;ALB;RPS27RT;RPL36;APOE;RPS23
BPDE 41322 human GSE19510 sample 3379	13/300	1.17256e-07	2.73799e-07	0	0	6.46766	103.217	RPL41;GPX1;RPS5;ACTG1;RPS15;EEF1A1;UBB;TMSB4X;UBC;PSAP;RPS11;B2M;TPT1
decitabine DB01262 human GSE29077 sample 2547	13/304	1.3665e-07	3.18265e-07	0	0	6.38256	100.882	RPL4;GPX1;RPS5;RPL36A;RPL8;RPS15;TMSB4X;RPL36;RPLP2;RPL13;RPS2;FAU;RPL19
quercetin DB04216 mouse GSE4262 sample 3428	14/360	1.41566e-07	3.28869e-07	0	0	5.80431	91.5369	IFITM3;RPL3;RPS7;LYZ2;RPL12;RPL11;HBA-A2;RPL23A;RPS15;C3;SERPINA1A;RPL36;RPL14;APOE
SODIUM BUTYRATE 5222465 mouse GSE4410 sample 3583	12/255	1.51694e-07	3.51495e-07	0	0	7.02371	110.282	EEF1A1;FTL1;FTH1;TMSB4X;UBC;RPLP0;RPL37A;MT2;MT1;RPL8;TPT1;ACTG1
methylprednisolone 6741 rat GSE490 sample 3666	13/307	1.53038e-07	3.53704e-07	0	0	6.32019	99.1801	HSPA8;LYZ2;RPLP0;HP;HSP90B1;RPS14;FTH1;UBC;RPL36;LCN2;RPL17;TPT1;RPS12
Methotrexate DB00563 human GSE11440 sample 3072	14/364	1.62016e-07	3.73503e-07	0	0	5.74053	89.7564	IFITM3;RPL4;HSPA8;HSP90AB1;GPX1;RPS6;RPL8;BST2;UBB;LCN2;PABPC1;FAU;B2M;PTMA
methamphetamine 10836 mouse GSE30305 sample 2621	13/310	1.71169e-07	3.93601e-07	0	0	6.25903	97.5195	IFITM3;HBB-BT;MT2;HBB-BS;ACTB;BST2;RPS3A1;LCN2;RPL14;IFI27L2A;B2M;S100A8;H2-D1
Triiodothyronine-[13C6] hydrochloride (T3 thyronine) 53442265 human GSE29159 sample 3046	13/311	1.77628e-07	4.07419e-07	0	0	6.2389	96.9749	FGB;HSPA8;FGA;ORM1;RPL3;AMBP;FGG;RPL8;C3;UBC;PSAP;APOC1;RPS2
morphine 5288826 mouse GSE7762 sample 3489	11/213	2.0203e-07	4.6222e-07	0	0	7.70794	118.817	RPS15;TTR;RPLP1;RPL11;RPL14;MT2;APOE;MT1;RPS2;RPL8;RPL6
rosiglitazone DB00412 human GSE5679 sample 2809	12/265	2.2973e-07	5.2427e-07	0	0	6.75866	103.315	RPS9;RPL41;UBB;RPS29;TMSB4X;RPLP0;APOC1;APOE;B2M;S100A9;PTMA;S100A8
diethylstilbestrol DB00255 mouse GSE1839 sample 2718	12/268	2.59271e-07	5.902e-07	0	0	6.683	101.35	IFITM3;C3;TMSB4X;H2-K1;UBC;LCN2;MT2;MT1;PABPC1;B2M;GAPDH;H2-D1
ethinyl estradiol DB00977 mouse GSE280 sample 2739	14/384	3.1006e-07	7.04045e-07	0	0	5.44154	81.5497	HSPA8;RPL41;LYZ2;MT2;HBA-A2;ACTB;ACTG1;EEF1A1;C3;RPL7A;UBC;RPL36;RPL13;RPS27A
puromycin, EC50, 5 d 439530 human GSE6930 sample 3270	11/228	3.99282e-07	9.04374e-07	0	0	7.20084	106.094	HSPA8;RPS29;TMSB4X;RPL36A;RPS3;RPL14;RPL38;RPS27A;RPS21;PTMA;CCNB1IP1
resveratrol DB02709 human GSE36930 sample 3497	12/285	5.0007e-07	1.12983e-06	0	0	6.28437	91.1769	RPL5;HSPA8;RPL41;RPS3;PABPC1;B2M;PTMA;GAPDH;S100A8;RPL7;RPS23;RPL19
5-Fluorouracil 3385 mouse GSE1559 sample 3637	12/289	5.79776e-07	1.30666e-06	0	0	6.19739	88.9983	RPS17;RPL41;UBB;RPLP1;RPL37A;RPL36A;RPL13A;RPS11;RPS27A;PTMA;ACTB;RPS23
doxycycline DB00254 mouse GSE29848 sample 3208	12/291	6.23711e-07	1.40219e-06	0	0	6.15479	87.9371	RPL4;RPS4X;RPL3;HSP90AB1;RPS3A1;TMSB4X;RPL23A;RPL26;FAU;EEF2;RPL7;HSP90B1
Streptozotocin effect on pancreas of offspring of protein-restricted dams 29327 mouse GSE38215 sample 3248	11/244	7.81707e-07	1.75304e-06	0	0	6.72865	94.6169	HSPA8;FTL1;HSP90AB1;LCN2;RPL36A;MT2;APOE;FAU;HIST1H3B;B2M;HSP90B1
Retinoic acid 444795 mouse GSE1588 sample 3632	11/250	9.92589e-07	2.22046e-06	0	0	6.56716	90.7776	RPL7A;RPL41;UBB;RPS5;RPS6;RPS3;RPS11;TPT1;HSP90B1;RPS23;RPL19
ubiquinol 9962735 mouse GSE15129 sample 3461	11/251	1.03222e-06	2.30344e-06	0	0	6.541	90.1598	EEF1A1;FTL1;GPX1;UBC;ALB;MT2;MT1;IFI27L2A;GAPDH;TPT1;ACTG1
Retinoic acid 444795 mouse GSE1588 sample 3633	12/306	1.05923e-06	2.35789e-06	0	0	5.85309	80.5266	RPL5;RPL41;HSP90AB1;RPLP1;RPS3;RPL13A;MYH9;PABPC1;RPS2;RPL8;RPS11;TPT1
ethanol 702 rat GSE55243 sample 3107	12/306	1.05923e-06	2.35211e-06	0	0	5.85309	80.5266	IFITM3;C3;HSPA8;GPX1;UBB;FTH1;UBC;FGG;LCN2;APOE;B2M;S100A9
cytarabine, EC50, 1 d 6253 human GSE6930 sample 3373	11/261	1.51211e-06	3.34956e-06	0	0	6.29039	84.3038	RPS9;GPX1;RPL32;RPS29;RPLP1;RPL36;RPSA;FAU;RPS27A;RPS21;RPS24
acrylamide 6579 rat GSE29004 sample 3110	12/326	2.04948e-06	4.52884e-06	0	0	5.494	71.96	C3;RPL7A;CD74;RPS17;FTL1;PSAP;RPL36A;RPL13A;FAU;RPS11;B2M;RPL6
estradiol 5757 mouse GSE2195 sample 3622	12/328	2.18347e-06	4.8132e-06	0	0	5.4605	71.1754	C3;HSPA8;HSP90AB1;UBB;RPS6;LCN2;MYH9;MT2;PABPC1;GAPDH;ACTG1;HSP90B1
morphine 5288826 mouse GSE7762 sample 3492	11/272	2.25718e-06	4.9636e-06	0	0	6.036	78.4764	EEF1A1;SERPINA1C;RPL32;RPS29;FTH1;RPLP1;RPL14;MT2;APOE;MT1;GAPDH
Etanercept DB00005 human GSE36177 sample 2597	10/221	2.44764e-06	5.3694e-06	0	0	6.75356	87.2586	RPL4;RPL5;RPS14;RPS17;RPS18;RPL12;RPS6;RPL14;RPL13A;RPL26
Bisphenol A 6623 human GSE17624 sample 2664	12/337	2.88717e-06	6.3183e-06	0	0	5.31467	67.7899	RPL5;HSP90AB1;FTH1;TMSB4X;UBC;PSAP;RPL11;RPL26;PABPC1;RPS2;EEF2;RPS27A
2,3,7,8-tetrachlorodibenzo-p-dioxin 10852289 mouse GSE2812 sample 3600	12/338	2.97654e-06	6.49818e-06	0	0	5.29895	67.4278	TMSB4X;RPS6;ALB;MYH9;APOE;EEF2;GAPDH;ACTB;RPS24;TPT1;ACTG1;RPS23
imatinib DB00619 human GSE22433 sample 2526	13/400	2.99474e-06	6.52219e-06	0	0	4.85075	61.695	RPLP1;RPL13A;RPL23A;RPL7;RPL7A;RPS18;PSAP;RPL37A;RPL14;RPLP2;RPS27A;B2M;PTMA
resveratrol DB02709 mouse GSE62194 sample 3467	9/182	3.8579e-06	8.38191e-06	0	0	7.38068	92.003	HSPA8;CD74;TTR;UBB;FTH1;RPLP1;PSAP;APOE;MT1
3,3',4,4'-Tetrachlorobiphenyl 36187 human GSE6878 sample 3272	11/290	4.17875e-06	9.05728e-06	0	0	5.66135	70.1186	RPS15;C3;RPL41;HSP90AB1;AMBP;RPS5;UBC;APOC1;APOE;FAU;CCNB1IP1
cisplatin DB00515 human GSE28274 sample 2531	10/239	4.91491e-06	1.06275e-05	0	0	6.24493	76.3332	EEF1A1;RPL5;HSPA8;RPL41;RPS7;UBB;RPS8;RPL36;RPL6;TPT1
doxorubicin, EC50, 1 d 31703 human GSE6930 sample 3260	11/300	5.7709e-06	1.24487e-05	0	0	5.47264	66.0147	RPS15;RPS9;RPL32;RPS29;RPL36A;RPSA;RPL26;RPL8;RPS27A;B2M;RPL19
isoflurane DB00753 rat GSE1779 sample 2771	12/362	5.99693e-06	1.29055e-05	0	0	4.94764	59.4917	RPL5;RPL7A;RPL41;RPL3;TTR;RPL12;RPS6;RPS3;RPL13A;RPL38;EEF2;ACTB
curcumin 969516 human GSE10896 sample 3406	13/431	6.72553e-06	1.44392e-05	0	0	4.50185	53.6153	HSPA8;HSP90AB1;RPS8;EEF2;RPL6;HSP90B1;EEF1G;UBB;RPS3;RPL26;FAU;S100A8;RPL19
mepenzolate bromide CID 6461 mouse GSE50836 sample 2502	12/374	8.3361e-06	1.78546e-05	0	0	4.78889	56.0057	RPL5;HSPA8;RPS17;ALB;APOC1;RPL13A;MT2;RPL26;RPS2;IFI27L2A;CCNB1IP1;RPS24
PBDE 47 95170 human GSE8588 sample 3050	11/316	9.42502e-06	2.01393e-05	0	0	5.19554	60.1235	RPL4;EEF1G;FTH1;RPL12;PSAP;RPL36;RPL36A;EEF2;CCNB1IP1;TPT1;HSP90B1
pioglitazone 4829 mouse GSE1458 sample 2587	11/318	9.99989e-06	2.13174e-05	0	0	5.16286	59.4397	RPL7A;RPL41;UBB;RPL36;RPL13;MT1;RPS2;GAPDH;RPL6;HSP90B1;RPL19
estradiol 5757 mouse GSE52711 sample 3120	10/280	1.95387e-05	4.15541e-05	0	0	5.33049	57.7991	EEF1A1;EEF1G;HSPA8;GPX1;RPS29;RPLP1;RPS2;GAPDH;TPT1;RPS12
cytarabine, 2xEC50, 3 d 6253 human GSE6930 sample 3423	10/282	2.07688e-05	4.40668e-05	0	0	5.29269	57.066	RPS18;FTH1;RPLP1;PSAP;RPS27A;B2M;CCNB1IP1;RPS24;TPT1;RPS23
ZINC ACETATE 11192 human GSE2964 sample 3589	12/411	2.13123e-05	4.51144e-05	0	0	4.35777	46.8732	RPS9;HSP90AB1;TMSB4X;UBC;RPL36A;RPL14;RPL26;RPL8;EEF2;B2M;RPS21;RPL6
4-Hydroxynonenal 5283344 human GSE2397 sample 3081	11/346	2.19059e-05	4.62628e-05	0	0	4.74506	50.9086	IFITM3;RPL4;RPL5;RPS7;UBB;RPS29;FTH1;PSAP;RPS3;RPL14;RPL6
quercetin DB04216 mouse GSE4262 sample 3429	9/229	2.44112e-05	5.14338e-05	0	0	5.86587	62.2983	RPS15;CD74;RPL3;RPLP0;SAA1;RPL13;MT2;H2-AA;RPL19
methamphetamine 10836 mouse GSE30305 sample 2614	13/489	2.55442e-05	5.36961e-05	0	0	3.96789	41.9608	IFITM3;LYZ2;H2-K1;MT2;BST2;FTL1;TTR;RPS3A1;LCN2;RPS3;PABPC1;IFI27L2A;TPT1
creatine 586 mouse GSE5140 sample 3205	12/421	2.69777e-05	5.65781e-05	0	0	4.25426	44.757	RPL4;HSP90AB1;TTR;RPS8;RPS27RT;RPLP0;RPL13;HBA-A2;RPL23A;RPS11;ACTB;RPL19
doxorubicin, 2xEC50, 1 d 31703 human GSE6930 sample 3263	10/296	3.13969e-05	6.56943e-05	0	0	5.04236	52.2832	RPL41;RPL32;RPS29;FTH1;RPLP1;PSAP;RPSA;RPL23A;FAU;RPS24
angiotensin II 172198 mouse GSE29145 sample 3217	10/297	3.23082e-05	6.74451e-05	0	0	5.02538	51.9634	CD74;FTL1;GPX1;LYZ2;MT2;APOE;HIST1H3B;IFI27L2A;H2-AA;HSP90B1
chlorambucil DB00291 human GSE8832 sample 2691	11/361	3.23138e-05	6.73018e-05	0	0	4.5479	47.0253	BST2;HSPA8;HSP90AB1;RPL11;RPSA;FAU;RPL8;RPS27A;B2M;RPS12;RPL19
2,2',4,4',5,5'-Hexachlorobiphenyl (PCB-153) 37034 human GSE6878 sample 3348	11/364	3.48427e-05	7.24025e-05	0	0	4.51041	46.2979	HSPA8;ORM1;GPX1;RPS29;AHSG;FTH1;PSAP;RPL14;EEF2;TPT1;ACTG1
PLX4720 CID 24180719 human GSE50791 sample 2506	10/303	3.82655e-05	7.9333e-05	0	0	4.92587	50.1008	IFITM3;BST2;FTH1;RPS6;PSAP;LCN2;MYH9;RPL38;B2M;TPT1
5-aza-2'-deoxycytidine DB01262 human GSE5230 sample 2497	11/372	4.24386e-05	8.77839e-05	0	0	4.41342	44.4319	C3;FABP1;FGA;ORM1;GPX1;AHSG;PSAP;APOC1;HP;ORM2;CFB
methamphetamine 10836 mouse GSE30305 sample 2612	9/253	5.31165e-05	0.000109621	0	0	5.30942	52.2608	IFITM3;BST2;TTR;LCN2;MT2;IFI27L2A;S100A9;S100A8;TPT1
Bisphenol A 6623 human GSE17624 sample 2658	12/453	5.48257e-05	0.000112891	0	0	3.95374	38.7915	RPL5;HSPA8;RPS9;HSP90AB1;GPX1;RPS8;RPS29;FTH1;TMSB4X;RPL36A;RPL6;HSP90B1
heroin 5462328 mouse GSE30305 sample 2615	11/393	6.95081e-05	0.000142799	0	0	4.17759	39.9965	EEF1A1;BST2;FTL1;TTR;RPS3A1;LYZ2;HBB-BT;MT2;HBB-BS;IFI27L2A;TPT1
Promegestone 36709 human GSE67561 sample 3694	9/265	7.58498e-05	0.000155475	0	0	5.06899	48.0883	UBC;RPS2;FAU;RPL8;S100A9;RPS21;ACTB;S100A8;ACTG1
vemurafenib DB08881 human GSE37441 sample 2561	9/265	7.58498e-05	0.000155124	0	0	5.06899	48.0883	IFITM3;C3;FTH1;PSAP;APOC1;HIST1H4H;RPL13A;SAA2;CFB
4-Vinylcyclohexene diepoxide 7833 mouse GSE23725 sample 3234	11/399	7.95461e-05	0.000162317	0	0	4.11476	38.84	BST2;RPS14;FTL1;HSP90AB1;PSAP;APOC1;HP;RPS2;GAPDH;ACTB;HSP90B1
Androstanolone 10635 human GSE7868 sample 3411	10/332	8.21283e-05	0.000167209	0	0	4.49559	42.2911	HSPA8;HSP90AB1;RPS8;UBC;RPS2;FAU;B2M;ACTB;ACTG1;HSP90B1
testosterone 6013 human GSE5106 sample 3206	9/271	8.99853e-05	0.000182795	0	0	4.95677	46.1766	IFITM3;HSPA8;HSP90AB1;RPS8;RPS29;FTH1;UBC;RPS11;RPL19
rosiglitazone 77999 mouse GSE11343 sample 2672	9/273	9.5163e-05	0.000192881	0	0	4.92045	45.563	ORM1;GPX1;TTR;RPS27RT;APOC1;RPL13;RPL38;IFI27L2A;GAPDH
2,2',4,4',5,5'-Hexachlorobiphenyl (PCB-153) 37034 human GSE6878 sample 3351	9/274	9.78442e-05	0.000197872	0	0	4.90249	45.2605	IFITM3;HSPA8;ORM1;RPS18;HP;MYH9;ORM2;ACTB;ACTG1
ubiquinol 9962735 human GSE19627 sample 3449	9/282	0.000121668	0.000245503	0	0	4.76342	42.9385	RPS4X;RPS17;RPL41;RPS29;FTH1;RPL11;RPL36;RPL26;TPT1
PBDE 85 177368 human GSE8588 sample 3051	10/350	0.000126712	0.000255113	0	0	4.26439	38.2669	RPL4;RPS9;HSP90AB1;RPL12;PSAP;RPL36;RPL36A;EEF2;CCNB1IP1;HSP90B1
decitabine 451668 mouse GSE4768 sample 3105	9/287	0.00013889	0.000279013	0	0	4.68043	41.5708	HSPA8;FTL1;FTH1;TMSB4X;UBC;MT2;MT1;B2M;ACTG1
Cisplatin DB00515 human GSE28274 sample 3253	8/226	0.000144396	0.000289431	0	0	5.28332	46.7201	EEF1A1;HSPA8;RPL41;RPS7;UBB;RPS8;RPL6;TPT1
dexamethasone DB01234 mouse GSE484 sample 2711	10/358	0.000152286	0.000304571	0	0	4.1691	36.6453	HSPA8;FTH1;HP;LCN2;RPL13;MT2;MT1;PABPC1;RPS2;HSP90B1
bleomycin DB00290 mouse GSE485 sample 2685	12/513	0.000176677	0.000352576	0	0	3.49132	30.1691	IFITM3;HSPA8;RPL3;RPS5;RPL36;MYH9;MT2;RPL23A;MT1;PTMA;S100A8;RPL7
motexafin gadolinium (4 h) DB05428 human GSE2189 sample 3125	9/298	0.000184049	0.00036648	0	0	4.50766	38.7673	RPS9;RPS7;FTH1;RPLP1;TMSB4X;RPL11;B2M;RPL7;ACTG1
arachidonic acid 444899 human GSE3737 sample 3119	10/367	0.000186136	0.000369823	0	0	4.06686	34.9304	HSPA8;RPL41;HSP90AB1;RPS18;RPS8;FTH1;TMSB4X;RPS3;RPS24;RPS12
Perfluorooctanoic Acid 9554 mouse GSE13044 sample 3523	9/300	0.000193448	0.000383509	0	0	4.47761	38.2858	FABP1;FTL1;GPX1;TTR;AMBP;APOA2;MT2;MT1;HAMP
dexamethasone DB01234 mouse GSE7683 sample 3524	10/370	0.000198741	0.000393143	0	0	4.03388	34.3828	FTL1;GPX1;RPS8;FTH1;TMSB4X;RPL36;LCN2;RPL14;MT2;MT1
Ascorbyl-2-phosphate 54679073 human GSE11919 sample 3191	9/304	0.000213447	0.000421315	0	0	4.4187	37.3473	IFITM3;RPS4X;RPL32;UBB;TMSB4X;RPL12;RPL36A;B2M;PTMA
NVP-TNKS656 (tankyrase inhibitor) 71227201 human GSE55624 sample 3247	9/307	0.000229552	0.000452117	0	0	4.37552	36.6641	HSPA8;RPL41;RPS18;TMSB4X;MYH9;RPL23A;RPL26;ACTB;ACTG1
estradiol 5757 human GSE12446 sample 3203	9/307	0.000229552	0.000451136	0	0	4.37552	36.6641	IFITM3;HSPA8;RPS17;RPL41;UBB;RPLP0;RPL36A;RPS2;GAPDH
puromycin, 2xEC50, 1d 439530 human GSE6930 sample 3371	9/308	0.000235139	0.000461117	0	0	4.36131	36.4402	RPL32;FTH1;UBC;RPL38;RPSA;RPL26;PTMA;RPL6;CCNB1IP1
estradiol 5757 mouse GSE2195 sample 3620	10/380	0.00024607	0.000481511	0	0	3.92773	32.639	HSPA8;UBC;MYH9;MT2;MT1;PTMA;GAPDH;ACTG1;HSP90B1;RPS23
TRICHLOROETHYLENE 6575 mouse GSE24278 sample 3318	9/310	0.000246654	0.000481612	0	0	4.33317	35.9979	EEF1G;LCN2;RPL14;SAA1;SAA2;RPSA;MT1;ORM2;S100A8
resveratrol DB02709 mouse GSE62194 sample 3466	9/312	0.000258633	0.000503916	0	0	4.3054	35.563	RPL7A;TTR;RPS3A1;LYZ2;HBB-BT;EEF2;PTMA;H2-AA;TPT1
sulforaphane 5350 human GSE28813 sample 3445	9/320	0.000311489	0.000605598	0	0	4.19776	33.8933	FTH1;UBC;PSAP;RPL37A;SAA1;GAPDH;ACTB;TPT1;ACTG1
propofol DB00818 human GSE4386 sample 2804	9/323	0.000333484	0.000646973	0	0	4.15877	33.2948	IFITM3;EEF1A1;HSPA8;RPL41;UBB;FTH1;UBC;ACTB;ACTG1
estradiol 5757 human GSE4668 sample 3062	9/325	0.00034885	0.000675337	0	0	4.13318	32.9037	HSPA8;UBC;RPL36A;RPS3;B2M;PTMA;GAPDH;ACTB;RPS23
quercetin 5280343 human GSE7259 sample 3415	9/336	0.0004442	0.000858092	0	0	3.99787	30.8605	HSPA8;HSP90AB1;RPLP1;TMSB4X;RPL12;UBC;RPS27A;ACTB;ACTG1
ethanol DB00898 rat GSE3311 sample 2737	8/267	0.000444661	0.000857156	0	0	4.47202	34.5159	IFITM3;HSPA8;FTL1;GPX1;RPS7;UBB;UBC;ACTB
MEK inhibitor (MEKi -AZD6244) 10127622 human GSE55624 sample 3251	8/274	0.000527491	0.00101466	0	0	4.35777	32.8898	IFITM3;RPL41;RPL11;MYH9;SAA2;RPL26;ACTB;ACTG1
Cholestyramine DB01432 human GSE11223 sample 3294	9/348	0.00057172	0.00109741	0	0	3.86001	28.8222	C3;CD74;AMBP;ALB;APOC1;LCN2;APOA2;APOE;CFB
bleomycin DB00290 mouse GSE485 sample 2684	9/352	0.000620365	0.00118827	0	0	3.81615	28.183	EEF1A1;HSPA8;GPX1;RPS3A1;RPL37A;MYH9;MT2;B2M;ACTB
Perfluorooctanoic Acid 9554 mouse GSE13044 sample 3522	8/283	0.000651929	0.00124609	0	0	4.21919	30.9502	FABP1;FTL1;GPX1;APOC1;APOA2;MT2;MT1;S100A8
Mepenzolate DB04843 mouse GSE50836 sample 2530	8/283	0.000651929	0.00124347	0	0	4.21919	30.9502	H2-T23;RPS17;SERPINA1C;AHSG;ALB;RPL36;S100A9;S100A8
fluoxetine DB00472 mouse GSE35765 sample 2500	9/363	0.000771882	0.00146917	0	0	3.70051	26.5203	RPL4;EEF1A1;RPL3;HSP90AB1;RPS3A1;FTH1;PSAP;GAPDH;HSP90B1
estradiol 5757 human GSE4668 sample 3063	9/367	0.000833954	0.00158399	0	0	3.66017	25.9482	RPL4;HSPA8;HSP90AB1;UBC;B2M;PTMA;GAPDH;ACTB;ACTG1
Tamoxifen DB00675 mouse GSE34232 sample 2579	9/369	0.000866482	0.00164233	0	0	3.64033	25.6683	C3;BST2;CD74;LYZ2;TMSB4X;TRF;GC;B2M;H2-AA
rosiglitazone 77999 mouse GSE1458 sample 2588	8/299	0.000931101	0.00176112	0	0	3.99341	27.8706	RPL7A;RPL41;UBB;RPS6;RPL36;GAPDH;HSP90B1;RPL19
PLX4720 CID 24180719 human GSE50791 sample 2505	8/299	0.000931101	0.00175745	0	0	3.99341	27.8706	FTH1;RPS6;PSAP;RPLP0;LCN2;RPL13A;PABPC1;B2M
Monuron 8800 rat GSE51163 sample 2468	8/301	0.000971871	0.00183059	0	0	3.96688	27.5154	FABP1;TTR;AMBP;AHSG;ALB;APOC1;HP;GC
HYPOCHLOROUS ACID 24341 human GSE11630 sample 3201	9/379	0.001045	0.00196426	0	0	3.54428	24.327	RPS4X;RPL5;RPS9;HSP90AB1;RPS8;PSAP;RPL26;RPS27A;RPS21
morphine DB00295 human GSE7762 sample 3288	8/306	0.00108008	0.002026	0	0	3.90206	26.6539	RPS14;RPL3;UBC;PSAP;RPL13;MT2;MT1;RPL6
isotretinoin DB00982 human GSE10432 sample 2772	8/308	0.00112598	0.00210772	0	0	3.87672	26.3194	IFITM3;FGB;FGA;TMSB4X;LCN2;S100A9;S100A8;CFB
cytarabine 6253 human GSE5681 sample 2599	8/309	0.00114951	0.00214732	0	0	3.86417	26.1544	EEF1A1;CD74;UBB;PSAP;B2M;ACTB;TPT1;ACTG1
ascorbic acid 54670067 human GSE11919 sample 3190	8/313	0.00124757	0.00232571	0	0	3.81479	25.5078	IFITM3;RPS7;UBB;TMSB4X;RPL12;RPL36A;B2M;ACTB
methamphetamine 10836 mouse GSE30305 sample 2619	7/244	0.00130397	0.00242586	0	0	4.28187	28.4416	IFITM3;TTR;HBB-BT;MT2;HBB-BS;IFI27L2A;ACTB
quercetin DB04216 mouse GSE4262 sample 3433	8/323	0.00152211	0.00282589	0	0	3.69669	23.9828	BST2;RPS14;RPS8;RPS5;RPLP1;MT2;PTMA;RPL6
quercetin DB04216 mouse GSE4262 sample 3434	8/324	0.00155201	0.00287551	0	0	3.68528	23.8371	LCN2;SAA1;SAA2;MT2;MT1;ORM2;S100A8;ACTG1
quercetin DB04216 mouse GSE4262 sample 3431	7/252	0.0015684	0.00289993	0	0	4.14594	26.7732	FABP1;FTL1;APOA1;MT2;MT1;IFI27L2A;B2M
heroin 5462328 mouse GSE30305 sample 2617	7/256	0.00171539	0.00316527	0	0	4.08116	25.9893	TTR;LCN2;HBB-BT;MT2;HBB-BS;S100A9;S100A8
adenosine triphosphate 5957 human GSE30903 sample 3219	7/259	0.00183251	0.0033745	0	0	4.03388	25.4218	EEF1A1;UBB;FTH1;TMSB4X;UBC;B2M;TPT1
estradiol 5757 mouse GSE2195 sample 3621	8/334	0.00187741	0.00345017	0	0	3.57494	22.443	HSPA8;LCN2;MYH9;MT2;MT1;GAPDH;ACTB;HSP90B1
soman 7305 rat GSE13428 sample 2633	10/500	0.00200629	0.00367955	0	0	2.98507	18.5417	IFITM3;C3;BST2;CD74;TTR;LYZ2;ALB;LCN2;B2M;CFB
adenosine triphosphate 5957 human GSE30903 sample 3221	7/271	0.00236436	0.0043275	0	0	3.85526	23.3137	RPS4X;RPL5;RPS9;RPS8;RPL13A;RPL26;RPL17
resveratrol DB02709 human GSE36930 sample 3498	8/349	0.00246417	0.00450108	0	0	3.42129	20.5479	RPL5;RPS14;RPL41;TMSB4X;RPS6;RPL8;HSP90B1;RPS23
CADMIUM 23973 human GSE9951 sample 3402	6/206	0.00267523	0.00487677	0	0	4.3472	25.7516	APOC1;RPL38;RPL8;RPS11;S100A9;S100A8
puromycin, 2xEC50, 3 d 439530 human GSE6930 sample 3372	7/279	0.00278025	0.00505804	0	0	3.74472	22.0385	RPL32;FTH1;RPL23A;RPL6;CCNB1IP1;RPS24;TPT1
quercetin DB04216 mouse GSE4262 sample 3427	8/360	0.00297926	0.00540923	0	0	3.31675	19.2905	RPS15;C3;SERPINA1A;CD74;LYZ2;RPL13A;APOE;H2-AA
soman 7305 rat GSE13428 sample 2640	10/532	0.00313484	0.00568033	0	0	2.80552	16.1743	IFITM3;C3;BST2;CD74;GPX1;TTR;LYZ2;LCN2;S100A9;S100A8
nicotine 942 human GSE6264 sample 3064	8/370	0.00351713	0.00636032	0	0	3.22711	18.2335	EEF1A1;RPLP1;RPL37A;RPL38;PABPC1;RPS11;EEF2;HSP90B1
TRICHLOROETHYLENE 6575 mouse GSE24278 sample 3317	7/294	0.00370921	0.00669432	0	0	3.55366	19.8896	EEF1G;HSPA8;HSP90AB1;LCN2;SAA2;MT2;CCNB1IP1
Bisphenol A 6623 human GSE17624 sample 2659	8/375	0.00381289	0.00686776	0	0	3.18408	17.7333	RPS8;FTH1;TMSB4X;UBC;PSAP;LCN2;CCNB1IP1;HSP90B1
heroin 5462328 mouse GSE30305 sample 2666	5/154	0.00381994	0.00686679	0	0	4.8459	26.9797	IFITM3;BST2;TTR;LCN2;IFI27L2A
heroin 5462328 mouse GSE30305 sample 2613	5/157	0.00414583	0.00743786	0	0	4.7533	26.075	LCN2;HBB-BT;HBB-BS;S100A9;S100A8
pioglitazone DB01132 mouse GSE32536 sample 2797	7/307	0.00469083	0.008399	0	0	3.40318	18.2483	C3;LARS2;TTR;LCN2;HIST1H3B;S100A9;S100A8
bleomycin DB00290 mouse GSE43695 sample 3104	7/311	0.00502909	0.0089869	0	0	3.35941	17.7797	BST2;ORM1;MT2;APOE;MT1;IFI27L2A;CFB
Atarax DB00557 human GSE31773 sample 2485	7/314	0.00529462	0.00944276	0	0	3.32731	17.4387	ORM1;FGG;HP;LCN2;S100A9;ORM2;S100A8
Bisphenol A 6623 human GSE17624 sample 2663	7/323	0.00615465	0.010955	0	0	3.2346	16.4659	FTH1;RPL12;UBC;PSAP;LCN2;CCNB1IP1;HSP90B1
methamphetamine 10836 mouse GSE30305 sample 2665	5/175	0.00653026	0.0116008	0	0	4.26439	21.4555	IFITM3;BST2;TTR;LCN2;IFI27L2A
pioglitazone DB01132 rat GSE20219 sample 2795	7/330	0.00689266	0.0122206	0	0	3.16599	15.7581	C3;CD74;RPS18;PSAP;RPLP0;RPS3;PTMA
etanercept DB00005 human GSE11903 sample 2610	6/253	0.00722365	0.0127825	0	0	3.53961	17.4517	RPL37A;RPL14;RPLP2;RPL38;RPS11;S100A8
estradiol 5757 mouse GSE52711 sample 3118	7/333	0.00722833	0.0127658	0	0	3.13747	15.4669	EEF1G;HSPA8;HSP90AB1;GPX1;GAPDH;ACTB;ACTG1
morphine 5288826 mouse GSE7762 sample 3488	7/337	0.00769461	0.0135629	0	0	3.10023	15.0895	GPX1;TTR;TMSB4X;RPS27RT;RPLP2;MT2;MT1
bleomycin DB00290 mouse GSE43695 sample 3106	7/367	0.0119311	0.0209895	0	0	2.8468	12.6074	BST2;ORM1;SERPINA3K;MT2;MT1;IFI27L2A;CFB
adenosine triphosphate 5957 human GSE30903 sample 3218	7/367	0.0119311	0.0209488	0	0	2.8468	12.6074	FTH1;UBC;RPLP0;PABPC1;EEF2;GAPDH;ACTB
methamphetamine 10836 mouse GSE30305 sample 2616	7/368	0.0120965	0.0211981	0	0	2.83907	12.534	TTR;RPS3A1;LCN2;HBB-BT;MT2;HBB-BS;ORM2
l-arginine 6322 mouse GSE34874 sample 3214	5/210	0.0136495	0.0238734	0	0	3.55366	15.2596	C3;HP;LCN2;S100A9;S100A8
Heregulin 56310950 human GSE22288 sample 3215	6/300	0.0157522	0.0274981	0	0	2.98507	12.3904	LCN2;SAA1;SAA2;S100A9;S100A8;CFB
titanium dioxide NA mouse GSE7475 sample 2823	6/301	0.0159869	0.027854	0	0	2.97516	12.3052	C3;HSP90AB1;LYZ2;LCN2;B2M;ACTB
sevoflurane DB01236 human GSE4386 sample 2816	7/390	0.0161679	0.0281154	0	0	2.67891	11.0498	HSPA8;RPL32;UBB;RPS29;UBC;FAU;HAMP
soman 7305 rat GSE13428 sample 2635	8/483	0.0161951	0.0281087	0	0	2.47211	10.1926	IFITM3;C3;CD74;TTR;LYZ2;LCN2;S100A9;CFB
carboplatin DB00958 human GSE49577 sample 3177	7/392	0.0165809	0.0287234	0	0	2.66525	10.9262	CD74;HP;LCN2;HIST1H4H;APOE;PTMA;RPL7
carboplatin DB00958 human GSE49577 sample 3178	6/305	0.0169496	0.0293061	0	0	2.93614	11.9721	LCN2;SAA1;SAA2;S100A9;S100A8;CFB
Insulin 3989 human GSE22309 sample 3368	7/397	0.0176462	0.0304522	0	0	2.63168	10.6247	RPS29;APOA1;SAA2;S100A9;PTMA;S100A8;ACTG1
zinc sulfate NA rat GSE11091 sample 2840	4/152	0.0192411	0.0331415	0	0	3.92773	15.5173	RPS29;FTH1;RPS5;APOE
heroin 5462328 mouse GSE30305 sample 2622	5/233	0.0204452	0.0351487	0	0	3.20287	12.4592	IFITM3;HBB-BT;HBB-BS;S100A9;S100A8
cetuximab DB00002 human GSE61495 sample 3133	6/321	0.021201	0.0363789	0	0	2.78979	10.751	CD74;FTH1;LCN2;SAA1;HIST1H4H;CFB
Curcumin 969516 human GSE16160 sample 3425	5/239	0.0225253	0.0385783	0	0	3.12246	11.8439	FTH1;PSAP;RPL38;RPS11;S100A8
Lipopolysaccharide 11970143 human GSE3140 sample 3595	6/330	0.023885	0.0408299	0	0	2.7137	10.1343	IFITM3;BST2;ORM1;LCN2;HAMP;CFB
methotrexate DB00563 human GSE41831 sample 2600	6/330	0.023885	0.040753	0	0	2.7137	10.1343	ORM1;RPL3;HSP90AB1;RPL36A;ORM2;RPS23
estradiol 5757 human GSE24592 sample 3347	6/331	0.0241967	0.0412072	0	0	2.70551	10.0686	FGB;HSP90AB1;TTR;FGG;SAA2;HSP90B1
heroin 5462328 mouse GSE30305 sample 2611	6/333	0.0248282	0.0422033	0	0	2.68926	9.93889	FTL1;TTR;RPS3A1;LCN2;HBB-BS;ACTB
adenosine triphosphate 5957 human GSE30903 sample 3220	5/246	0.0251204	0.0426199	0	0	3.03361	11.1761	FTH1;UBC;PABPC1;GAPDH;TPT1
clozapine 2818 mouse GSE6467 sample 2464	5/246	0.0251204	0.0425403	0	0	3.03361	11.1761	RPS14;RPS27RT;MT2;S100A9;S100A8
Lipopolysaccharide 11970143 human GSE3140 sample 3594	6/335	0.0254707	0.043053	0	0	2.6732	9.81126	IFITM3;C3;BST2;LCN2;HAMP;CFB
rosiglitazone DB00412 rat GSE21329 sample 2844	5/253	0.0279005	0.0470723	0	0	2.94968	10.5572	RPL41;ALB;LCN2;APOE;GAPDH
quercetin DB04216 mouse GSE4262 sample 3432	5/254	0.028313	0.0476794	0	0	2.93807	10.4725	FABP1;LYZ2;ALB;RPL11;MT2
cisplatin DB00515 human GSE28274 sample 3254	5/254	0.028313	0.047591	0	0	2.93807	10.4725	RPL5;UBB;RPS8;RPS29;RPL36
vitamin c DB00126 mouse GSE19379 sample 3512	6/345	0.0288497	0.0484033	0	0	2.59572	9.20352	IFITM3;BST2;SERPINA1C;AHSG;HIST1H4H;CFB
soman 7305 rat GSE13428 sample 2637	7/445	0.0304293	0.0509593	0	0	2.34781	8.19937	IFITM3;BST2;CD74;GPX1;TTR;LYZ2;LCN2
nicotinamide riboside 439924 mouse GSE62194 sample 3470	6/350	0.0306451	0.051226	0	0	2.55864	8.91757	APOC1;LCN2;HBB-BT;S100A9;S100A8;HSP90B1
trichostatin A 444732 mouse GSE1437 sample 3085	8/557	0.0340467	0.0568072	0	0	2.14368	7.24569	CD74;AHSG;H2-K1;FGG;MT1;IFI27L2A;B2M;H2-D1
Retinoic acid 444795 human GSE32161 sample 3237	6/359	0.0340587	0.0567228	0	0	2.49449	8.43056	FGB;FGG;LCN2;SAA2;S100A9;ORM2
streptozocin DB00428 mouse GSE39752 sample 3065	6/359	0.0340587	0.0566187	0	0	2.49449	8.43056	LCN2;SAA2;MT2;MT1;IFI27L2A;ORM2
TRICHLOROETHYLENE 6575 mouse GSE24278 sample 3324	5/270	0.035444	0.0588137	0	0	2.76396	9.23107	FTL1;HSP90AB1;MT1;GAPDH;RPS12
bortezomib DB00188 human GSE30931 sample 2686	6/364	0.0360577	0.0597226	0	0	2.46023	8.17444	HSPA8;HSP90AB1;UBB;FTH1;UBC;PSAP
Fasudil 3547 mouse GSE25829 sample 3275	3/110	0.0377932	0.062483	0	0	4.07056	13.3336	LYZ2;TRF;EEF2
Insulin Regular DB00030 mouse GSE39752 sample 3290	6/370	0.0385544	0.0636254	0	0	2.42033	7.87983	LCN2;SAA2;MT2;MT1;IFI27L2A;ORM2
etanercept DB00005 human GSE41663 sample 2605	5/278	0.0393909	0.0648876	0	0	2.68442	8.682	RPL41;APOC1;RPL38;EEF2;CCNB1IP1
SODIUM ARSENITE 443495 mouse GSE11056 sample 3361	5/280	0.040418	0.0664586	0	0	2.66525	8.55139	WFDC21;LCN2;MT2;S100A9;S100A8
Lipopolysaccharide 11970143 human GSE5504 sample 3486	6/376	0.0411593	0.067555	0	0	2.38171	7.59838	IFITM3;C3;BST2;CD74;S100A8;CFB
soman 7305 rat GSE13428 sample 2632	7/476	0.0413799	0.0677942	0	0	2.19491	6.99069	IFITM3;C3;CD74;LYZ2;LCN2;S100A9;CFB
ethanol 702 human GSE44456 sample 3037	5/282	0.0414612	0.0678047	0	0	2.64634	8.4233	IFITM3;TTR;S100A8;CFB;RPL19
Etanercept DB00005 human GSE36177 sample 2596	6/377	0.0416041	0.0679158	0	0	2.37539	7.55269	GPX1;RPS18;LCN2;RPL14;FAU;RPS23
soman 7305 rat GSE13428 sample 2639	7/490	0.0470728	0.0767049	0	0	2.1322	6.51612	IFITM3;C3;CD74;GPX1;TTR;LYZ2;LCN2
4-Hydroxynonenal 5283344 human GSE2397 sample 3079	6/390	0.0476636	0.0775282	0	0	2.29621	6.98872	RPL4;HSPA8;RPS7;PSAP;RPS3;RPL14
Ascorbic acid 54670067 mouse GSE37676 sample 3132	5/294	0.0480625	0.078037	0	0	2.53833	7.70447	RPL32;RPS3A1;RPS27RT;RPS11;RPS27A
methamphetamine 10836 mouse GSE30305 sample 2609	5/297	0.0498049	0.0807213	0	0	2.51269	7.53717	TTR;RPS3A1;HBB-BT;HBB-BS;ACTB
TRICHLOROETHYLENE 6575 mouse GSE24278 sample 3322	5/301	0.0521855	0.0844286	0	0	2.4793	7.32125	RPL11;SAA2;PABPC1;HAMP;CCNB1IP1
acetaminophen DB00316 mouse GSE37874 sample 2482	5/301	0.0521855	0.0842781	0	0	2.4793	7.32125	LCN2;MT1;S100A9;ORM2;S100A8
estradiol DB00783 human GSE11506 sample 2730	5/304	0.054014	0.087076	0	0	2.45483	7.16445	RPL37A;RPL38;RPS11;S100A9;S100A8
Adriamycin DB00997 mouse GSE44355 sample 2486	5/305	0.0546318	0.0879154	0	0	2.44678	7.11314	IFITM3;LYZ2;PSAP;HIST1H4H;S100A8
TRICHLOROETHYLENE 6575 mouse GSE24278 sample 3323	5/307	0.0558796	0.089764	0	0	2.43084	7.0119	ORM1;MT2;ORM2;GAPDH;CCNB1IP1
vancomycin DB14969 mouse GSE7793 sample 3395	5/308	0.0565096	0.0906155	0	0	2.42295	6.96197	C3;HSP90AB1;RPS29;TMSB4X;H2-D1
PBDE 47 95170 rat GSE19868 sample 3393	5/311	0.0584245	0.0935205	0	0	2.39958	6.81485	RPS9;APOA2;RPS3;RPS2;RPL7
celecoxib DB00482 human GSE11237 sample 3296	4/221	0.0615742	0.0983884	0	0	2.70143	7.53025	FGB;FGA;S100A9;S100A8
corticosterone 5753 rat GSE37618 sample 3094	5/319	0.0637113	0.101624	0	0	2.3394	6.44129	CD74;HSP90AB1;RPS7;SAA2;S100A9
doxorubicin 31703 human GSE13477 sample 2641	5/320	0.0643906	0.102527	0	0	2.33209	6.39643	RPS4X;PSAP;EEF2;B2M;ACTG1
morphine 5288826 mouse GSE7762 sample 3490	5/323	0.066453	0.105625	0	0	2.31043	6.26417	EEF1A1;FTH1;RPLP1;MT2;ACTB
Monuron 8800 rat GSE51163 sample 2470	5/324	0.0671487	0.106544	0	0	2.3033	6.22085	IFITM3;WFDC21;LCN2;MYH9;S100A9
TRICHLOROETHYLENE 6575 mouse GSE24278 sample 3314	5/329	0.0706879	0.111964	0	0	2.26829	6.0098	RPL11;RPL14;SAA1;SAA2;MT2
methamphetamine DB01577 rat GSE46717 sample 3303	5/333	0.0735924	0.116361	0	0	2.24105	5.84737	CD74;TTR;RPL36A;GC;ACTG1
olanzapine 4585 rat GSE2547 sample 2511	6/438	0.0745921	0.117736	0	0	2.04457	5.30714	EEF1A1;RPL41;LYZ2;RPS6;RPL23A;B2M
methamphetamine 10836 mouse GSE30305 sample 2667	6/439	0.0752299	0.118536	0	0	2.03991	5.27768	BST2;FTL1;RPS3A1;SAA2;IFI27L2A;ACTB
TRICHLOROETHYLENE 6575 mouse GSE24278 sample 3310	5/338	0.0773139	0.121608	0	0	2.2079	5.65195	RPL11;SAA1;SAA2;CCNB1IP1;RPS12
troglitazone DB00197 rat GSE21329 sample 2832	4/245	0.0827818	0.129983	0	0	2.4368	6.07139	FTH1;ALB;B2M;GAPDH
vitamin c DB00126 mouse GSE19379 sample 3513	5/348	0.0850572	0.133325	0	0	2.14445	5.28485	SERPINA1B;SERPINA1C;AHSG;APOE;CCNB1IP1
phorbol 12-myristate 13-acetate (PMA) 27924 human GSE45417 sample 3246	5/349	0.0858534	0.134341	0	0	2.13831	5.24978	C3;FTH1;PSAP;APOC1;S100A9
estradiol DB00783 human GSE4668 sample 2727	5/350	0.0866535	0.135359	0	0	2.1322	5.21501	B2M;PTMA;ACTB;ACTG1;RPS23
heroin 5462328 mouse GSE30305 sample 2668	5/350	0.0866535	0.135126	0	0	2.1322	5.21501	BST2;LYZ2;APOC1;IFI27L2A;ACTB
clozapine 2818 mouse GSE6511 sample 2469	5/350	0.0866535	0.134894	0	0	2.1322	5.21501	LYZ2;S100A9;GAPDH;ACTB;S100A8
phorbol ester 12-O-tetradecanoylphorbol-13-acetate (TPA) 27924 mouse GSE40849 sample 3257	4/255	0.0925542	0.143832	0	0	2.34124	5.57205	C3;LCN2;S100A9;S100A8
estradiol 5757 mouse GSE2195 sample 3623	5/366	0.0999854	0.155114	0	0	2.03899	4.69524	C3;TMSB4X;LCN2;GAPDH;HSP90B1
CasIIgly 144221079 human GSE41827 sample 3130	3/174	0.111805	0.173155	0	0	2.57334	5.63818	C3;FTH1;UBC
estradiol DB00783 human GSE11352 sample 2729	5/390	0.121792	0.1883	0	0	1.91351	4.02878	RPL5;HSPA8;HSP90AB1;FAU;PTMA
cisplatin DB00515 human GSE47856 sample 3146	5/392	0.123703	0.190929	0	0	1.90375	3.97858	IFITM3;C3;LCN2;B2M;CFB
folic acid DB00158 human GSE17635 sample 2748	4/285	0.124934	0.192501	0	0	2.09479	4.35709	UBC;APOE;HAMP;HSP90B1
ethanol DB00898 mouse GSE52644 sample 3476	4/286	0.126088	0.193949	0	0	2.08746	4.32267	LCN2;MT2;MT1;S100A8
progesterone 5994 mouse GSE6440 sample 3686	4/286	0.126088	0.19362	0	0	2.08746	4.32267	LCN2;MT2;MT1;HSP90B1
quercetin DB04216 mouse GSE4262 sample 3430	4/288	0.128409	0.19685	0	0	2.07297	4.25484	SERPINA1B;LYZ2;HAMP;HSP90B1
bleomycin DB00290 mouse GSE25640 sample 3121	5/399	0.130503	0.199722	0	0	1.87035	3.8087	WFDC21;ORM1;LCN2;MT2;MT1
vancomycin DB14969 mouse GSE7793 sample 3396	4/292	0.133105	0.203361	0	0	2.04457	4.12312	RPS29;AHSG;ACTB;H2-D1
nicotinamide riboside 439924 mouse GSE62194 sample 3469	3/189	0.13384	0.20414	0	0	2.36911	4.76453	TTR;EEF2;H2-AA
imiquimod DB00724 mouse GSE27628 sample 3073	4/293	0.13429	0.204482	0	0	2.03759	4.09099	LCN2;SAA1;S100A9;S100A8
phorbol ester 12-O-tetradecanoylphorbol-13-acetate (TPA) 27924 mouse GSE40849 sample 3256	4/296	0.137871	0.209582	0	0	2.01694	3.99645	CD74;WFDC21;ORM1;H2-AA
Atorvastatin DB01076 human GSE11393 sample 3196	4/297	0.139073	0.211056	0	0	2.01015	3.96554	IFITM3;ORM1;HP;LCN2
cediranib 9933475 human GSE32569 sample 2642	4/299	0.14149	0.214365	0	0	1.99671	3.90461	BST2;S100A9;HAMP;S100A8
ethanol 702 human GSE44456 sample 3038	4/300	0.142705	0.215845	0	0	1.99005	3.87457	IFITM3;RPS5;RPLP2;S100A8
bleomycin DB00290 mouse GSE25640 sample 3122	4/304	0.147607	0.222886	0	0	1.96386	3.75728	WFDC21;LCN2;MT2;APOE
SODIUM ARSENITE 443495 mouse GSE11056 sample 3356	4/315	0.161415	0.243331	0	0	1.89529	3.45658	ORM1;APOC1;SAA1;HAMP
cycloheximide 6197 human GSE8597 sample 3059	4/320	0.167844	0.252603	0	0	1.86567	3.3297	HIST1H4H;HIST1H3B;S100A9;S100A8
phenobarbital sodium 23674889 mouse GSE6721 sample 2462	3/211	0.168571	0.253276	0	0	2.12209	3.77817	LCN2;S100A9;RPL17
doxorubicin DB00997 human GSE58074 sample 3180	4/326	0.175678	0.263517	0	0	1.83133	3.18488	BST2;HIST1H4H;APOE;HIST1H3B
Retinoic acid 444795 human GSE23702 sample 3231	3/220	0.183474	0.274756	0	0	2.03528	3.45119	RPS8;B2M;S100A8
metoprolol DB00264 human GSE11223 sample 3287	3/221	0.185151	0.27681	0	0	2.02607	3.41713	C3;FTH1;FGG
Fasudil 3547 mouse GSE25829 sample 3277	3/221	0.185151	0.276354	0	0	2.02607	3.41713	LYZ2;LCN2;HIST1H4H
heroin 5462328 mouse GSE30305 sample 2620	4/347	0.204031	0.304034	0	0	1.7205	2.73471	TTR;LCN2;HBB-BT;HBB-BS
Celecoxib DB00482 human GSE54657 sample 2501	4/347	0.204031	0.303534	0	0	1.7205	2.73471	FGA;FGG;APOA2;HIST1H4H
cytarabine, 2xEC50, 1 d 6253 human GSE6930 sample 3422	4/347	0.204031	0.303037	0	0	1.7205	2.73471	IFITM3;RPS5;TMSB4X;B2M
vemurafenib DB08881 human GSE37441 sample 2560	3/236	0.210774	0.312538	0	0	1.89729	2.95403	EEF1G;RPL13A;CFB
Retinoic acid 444795 human GSE23702 sample 3232	3/237	0.21251	0.314598	0	0	1.88929	2.92607	RPS8;B2M;S100A8
imatinib DB00619 mouse GSE35559 sample 2525	5/474	0.212811	0.314531	0	0	1.57441	2.43616	HP;LCN2;APOE;S100A9;S100A8
formaldehyde 712 rat GSE7002 sample 3551	4/354	0.213773	0.315437	0	0	1.68648	2.60197	LYZ2;S100A9;S100A8;RPS24
DETA NONOate 24890998 mouse GSE22087 sample 3212	6/600	0.215089	0.316863	0	0	1.49254	2.29359	FGB;HSPA8;AMBP;RPL12;HIST1H4H;TRF
TRICHLOROETHYLENE 6575 mouse GSE24278 sample 3315	4/355	0.215175	0.316476	0	0	1.68173	2.58365	HSP90AB1;MT2;PABPC1;CCNB1IP1
isotretinoin 5282379 human GSE10433 sample 2498	3/245	0.226508	0.332604	0	0	1.8276	2.71393	LCN2;S100A9;S100A8
formaldehyde 712 rat GSE7002 sample 3548	3/247	0.230036	0.337238	0	0	1.8128	2.66394	HPX;FTL1;S100A8
tretinoin DB00755 human GSE23702 sample 2828	3/252	0.238901	0.349667	0	0	1.77683	2.5439	PSAP;B2M;S100A8
ANGIOTENSIN II 172198 mouse GSE17901 sample 3678	4/372	0.239389	0.349817	0	0	1.60488	2.29444	WFDC21;LYZ2;LCN2;MT2
Capsaicin 1548943 rat GSE59727 sample 3693	3/257	0.247824	0.361559	0	0	1.74226	2.43052	CD74;TTR;S100A8
NICKEL CHLORIDE 24385 rat GSE31503 sample 3278	3/258	0.249615	0.363587	0	0	1.73551	2.4086	C3;LCN2;APOA1
haloperidol 3559 mouse GSE6467 sample 2466	3/260	0.253203	0.368221	0	0	1.72216	2.3655	HBA-A2;S100A9;S100A8
Retinoic acid 444795 human GSE23702 sample 3233	3/260	0.253203	0.367631	0	0	1.72216	2.3655	PSAP;B2M;S100A8
angiotensin II 172198 mouse GSE29145 sample 3216	3/262	0.256798	0.372255	0	0	1.70901	2.32334	EEF1A1;LYZ2;B2M
Perfluorooctanoic Acid 9554 mouse GSE13044 sample 3521	3/265	0.262205	0.379485	0	0	1.68966	2.26183	FABP1;FTL1;HAMP
HYPOCHLOROUS ACID 24341 mouse GSE15457 sample 3385	3/267	0.265818	0.384101	0	0	1.67701	2.22194	LCN2;S100A8;HSP90B1
vemurafenib DB08881 human GSE37441 sample 2559	3/271	0.273062	0.39394	0	0	1.65226	2.14472	EEF1G;RPL7A;RPS12
soman 7305 rat GSE13428 sample 2636	4/399	0.279034	0.401916	0	0	1.49628	1.90988	IFITM3;TTR;LCN2;S100A9
dexamethasone DB01234 human GSE54608 sample 3093	3/278	0.285789	0.410992	0	0	1.61065	2.01734	SAA1;SAA2;RPL19
pioglitazone DB01132 rat GSE21329 sample 2841	3/279	0.287612	0.412958	0	0	1.60488	1.99991	ALB;B2M;GAPDH
methotrexate DB00563 human GSE41831 sample 2601	3/279	0.287612	0.412304	0	0	1.60488	1.99991	HP;RPS27A;HSP90B1
deltamethrin 40585 rat GSE7955 sample 3420	3/280	0.289436	0.414263	0	0	1.59915	1.98266	C3;APOC1;S100A9
rosiglitazone DB00412 mouse GSE10192 sample 2812	3/283	0.294912	0.421435	0	0	1.5822	1.93199	HIST2H2AA2;HIST1H4H;CCNB1IP1
2,3,7,8-tetrachlorodibenzo-p-dioxin 15625 mouse GSE4873 sample 2595	3/285	0.298566	0.425986	0	0	1.57109	1.89908	ALB;FGG;HAMP
Perfluorooctanoic Acid 9554 mouse GSE13044 sample 3520	3/286	0.300395	0.427921	0	0	1.5656	1.88288	FABP1;FTL1;HAMP
rituximab DB00073 human GSE15490 sample 2577	3/287	0.302224	0.42985	0	0	1.56014	1.86685	RPS11;S100A9;S100A8
Mehp 20393 rat GSE4514 sample 3577	4/418	0.307548	0.436737	0	0	1.42827	1.6841	RPS15;RPL32;UBC;RPS21
Methylphenidate DB00422 mouse GSE33619 sample 2499	3/294	0.315041	0.446678	0	0	1.523	1.75914	SERPINA1C;TTR;H2-AA
2,3,7,8-tetrachlorodibenzo-p-dioxin (TCDD) 15625 human GSE16160 sample 3426	3/299	0.324206	0.458954	0	0	1.49753	1.68678	RPL37A;RPL38;RPS11
soman 7305 rat GSE13428 sample 2638	4/441	0.342444	0.484016	0	0	1.35378	1.45077	IFITM3;ALB;LCN2;S100A9
TRICHLOROETHYLENE 6575 mouse GSE24278 sample 3313	3/312	0.34803	0.491145	0	0	1.43513	1.51473	C3;MT2;MT1
CADMIUM 23973 human GSE9951 sample 3404	3/313	0.349861	0.492961	0	0	1.43055	1.50239	RPL37A;RPL38;RPS11
PBDE 47 CID 95170 rat GSE19868 sample 3392	3/315	0.35352	0.497344	0	0	1.42146	1.47806	RPS9;APOA2;RPL7
R1881 13766 human GSE22606 sample 3049	3/324	0.369957	0.51966	0	0	1.38198	1.3742	ORM1;TTR;ORM2
DETA NONOate 24890998 mouse GSE22087 sample 3211	5/600	0.375107	0.526078	0	0	1.24378	1.21958	SERPINA1A;HSPA8;SERPINA1C;AMBP;HIST1H4H
cetuximab DB00002 human GSE61495 sample 3135	3/327	0.375421	0.525705	0	0	1.3693	1.34151	CD74;PTMA;CFB
cisplatin DB00515 human GSE47856 sample 3143	3/327	0.375421	0.524894	0	0	1.3693	1.34151	C3;SAA1;SAA2
rosiglitazone DB00412 mouse GSE35011 sample 3267	3/329	0.379059	0.529163	0	0	1.36098	1.32023	BST2;FTL1;GAPDH
SB 216763 176158 human GSE19736 sample 3266	3/330	0.380876	0.530882	0	0	1.35685	1.30974	CD74;PSAP;B2M
Cadmium dichloride 24947 rat GSE31503 sample 3281	3/331	0.382692	0.532595	0	0	1.35275	1.29935	LCN2;APOA1;HAMP
Cadmium dichloride 24947 rat GSE31503 sample 3283	3/332	0.384507	0.5343	0	0	1.34868	1.28906	C3;WFDC21;APOA1
cisplatin DB00515 human GSE47856 sample 3158	4/471	0.388111	0.538481	0	0	1.26755	1.19969	HP;LCN2;SAA1;SAA2
R1881 13766 human GSE22606 sample 3048	3/336	0.391756	0.542707	0	0	1.33262	1.24882	ORM1;HIST1H4H;ORM2
cisplatin DB00515 human GSE42172 sample 3095	3/338	0.395372	0.546881	0	0	1.32474	1.22926	RPL32;HIST1H4H;RPS12
cisplatin DB00515 human GSE47856 sample 3159	3/343	0.40439	0.558501	0	0	1.30543	1.1819	RPS29;HP;B2M
PLX4032 DB05238 human GSE24862 sample 2567	2/207	0.404773	0.55818	0	0	1.44207	1.30425	HSP90AB1;ORM2
dactinomycin DB00970 mouse GSE5324 sample 2701	1/78	0.408665	0.562691	0	0	1.91351	1.71232	LCN2
HYPOCHLOROUS ACID 24341 mouse GSE15457 sample 3381	3/350	0.41695	0.573226	0	0	1.27932	1.11913	LCN2;S100A8;HSP90B1
etanercept DB00005 human GSE47751 sample 2592	3/351	0.418737	0.574812	0	0	1.27567	1.11049	APOC1;LCN2;SAA2
etanercept DB00005 human GSE47751 sample 2593	3/362	0.43828	0.600729	0	0	1.23691	1.02032	C3;FTH1;SAA2
irinotecan DB00762 rat GSE11722 sample 2769	2/224	0.443939	0.607566	0	0	1.33262	1.08218	TMSB4X;UBC
1-[3-(Trifluoromethyl)phenyl]piperazine 4296 rat GSE68785 sample 3688	2/225	0.446199	0.609738	0	0	1.3267	1.07063	IFITM3;HAMP
imatinib DB00619 human GSE1922 sample 2519	2/226	0.448455	0.611897	0	0	1.32083	1.05924	PSAP;APOE
TRICHLOROETHYLENE 6575 mouse GSE24278 sample 3309	3/369	0.450591	0.613888	0	0	1.21344	0.967353	MT2;MT1;RPS12
vitamin c DB00126 mouse GSE32994 sample 3511	3/370	0.452341	0.615347	0	0	1.21017	0.960047	LYZ2;H2-K1;HIST1H3B
decitabine 451668 mouse GSE4768 sample 3108	3/374	0.459318	0.623902	0	0	1.19722	0.931453	RPS8;MT2;HSP90B1
1,2,4-BENZENETRIOL 10787 human GSE7664 sample 3535	3/374	0.459318	0.622968	0	0	1.19722	0.931453	RPS11;HAMP;S100A8
TRICHLOROETHYLENE 6575 mouse GSE24278 sample 3319	2/234	0.466311	0.631507	0	0	1.27567	0.973214	LCN2;PABPC1
imatinib DB00619 human GSE1922 sample 2516	2/235	0.46852	0.63355	0	0	1.27024	0.963071	PSAP;APOE
imatinib DB00619 human GSE1922 sample 2515	2/235	0.46852	0.632606	0	0	1.27024	0.963071	PSAP;APOE
etanercept DB00005 human GSE11903 sample 2606	3/380	0.469715	0.633276	0	0	1.17832	0.890373	C3;BST2;FTH1
mesalazine DB00244 human GSE38713 sample 3289	2/237	0.47292	0.63665	0	0	1.25953	0.943169	LCN2;RPS24
resveratrol DB02709 human GSE32357 sample 3499	2/240	0.47948	0.644524	0	0	1.24378	0.914245	IFITM3;APOC1
morphine DB00295 mouse GSE15774 sample 2787	2/240	0.47948	0.643569	0	0	1.24378	0.914245	FABP1;TTR
cisplatin DB00515 human GSE47856 sample 3160	3/387	0.481731	0.645634	0	0	1.15701	0.845041	IFITM3;C3;LCN2
Interferon beta-1a DB00060 human GSE26104 sample 3187	3/394	0.493621	0.660592	0	0	1.13645	0.802319	IFITM3;BST2;HP
imatinib DB00619 human GSE1922 sample 2517	2/247	0.494593	0.660916	0	0	1.20853	0.850831	PSAP;APOE
1-Piperonylpiperazine 94426 rat GSE68785 sample 3690	2/247	0.494593	0.659943	0	0	1.20853	0.850831	AHSG;HAMP
Cadmium dichloride 24947 rat GSE31503 sample 3282	3/396	0.496994	0.662171	0	0	1.13071	0.790567	GPX1;LCN2;APOA1
TRICHLOROETHYLENE 6575 mouse GSE24278 sample 3321	2/257	0.5157	0.686085	0	0	1.16151	0.769186	MT1;S100A8
vancomycin DB14969 mouse GSE7793 sample 3399	2/257	0.5157	0.685079	0	0	1.16151	0.769186	C3;AHSG
vemurafenib DB08881 human GSE63790 sample 2508	2/259	0.519851	0.689583	0	0	1.15254	0.754005	HIST1H4H;S100A8
HYPOCHLOROUS ACID 24341 mouse GSE15457 sample 3386	1/110	0.523605	0.693547	0	0	1.35685	0.877907	HIST1H3B
Cobalt dichloride hexahydrate 24643 rat GSE51207 sample 3117	2/262	0.526035	0.695748	0	0	1.13934	0.731899	C3;BST2
formaldehyde 712 rat GSE7002 sample 3552	3/414	0.526835	0.695791	0	0	1.08155	0.693129	LCN2;S100A9;S100A8
temozolomide 5394 human GSE43452 sample 2555	2/271	0.544264	0.717763	0	0	1.1015	0.670068	RPS3;PTMA
formaldehyde 712 rat GSE7002 sample 3546	2/272	0.546259	0.719347	0	0	1.09745	0.663588	FTL1;S100A9
Lipopolysaccharide 11970143 human GSE5504 sample 3485	3/428	0.549368	0.722391	0	0	1.04617	0.626643	IFITM3;S100A8;CFB
Perfluorooctanoic Acid 9554 mouse GSE13044 sample 3519	2/276	0.554181	0.727663	0	0	1.08155	0.6384	FABP1;HIST1H3B
formaldehyde 712 rat GSE7002 sample 3542	2/278	0.558105	0.731756	0	0	1.07377	0.62623	S100A9;S100A8
carboplatin DB00958 human GSE49577 sample 3176	2/279	0.560058	0.733255	0	0	1.06992	0.620248	RPL13;APOE
ethanol DB00898 mouse GSE52644 sample 3475	2/279	0.560058	0.732197	0	0	1.06992	0.620248	MT2;MT1
sorafenib DB00398 human GSE39192 sample 3055	2/282	0.56588	0.738743	0	0	1.05854	0.602702	IFITM3;HIST1H3B
Cobalt dichloride hexahydrate 24643 rat GSE51207 sample 3116	2/283	0.567809	0.740194	0	0	1.0548	0.596983	C3;GAPDH
DAPT 5311272 rat GSE31668 sample 2648	2/285	0.571648	0.744128	0	0	1.04739	0.585737	C3;LCN2
HYPOCHLOROUS ACID 24341 mouse GSE15457 sample 3384	2/287	0.575462	0.748018	0	0	1.0401	0.574738	LCN2;S100A8
imatinib DB00619 human GSE1922 sample 2512	2/287	0.575462	0.746947	0	0	1.0401	0.574738	PSAP;APOE
imatinib DB00619 human GSE1922 sample 2520	2/287	0.575462	0.745878	0	0	1.0401	0.574738	PSAP;APOE
azacitidine DB00928 human GSE29077 sample 2545	2/290	0.581138	0.752158	0	0	1.02934	0.55869	RPLP1;UBC
HYPOCHLOROUS ACID 24341 mouse GSE15457 sample 3383	2/291	0.583017	0.753514	0	0	1.0258	0.553458	LCN2;S100A8
TRICHLOROETHYLENE 6575 mouse GSE24278 sample 3312	2/292	0.584891	0.754859	0	0	1.02229	0.548283	EEF1G;HSP90AB1
doxycycline DB00254 human GSE41035 sample 3041	2/292	0.584891	0.753785	0	0	1.02229	0.548283	LCN2;S100A8
SODIUM ARSENITE 443495 mouse GSE11056 sample 3359	2/292	0.584891	0.752714	0	0	1.02229	0.548283	S100A9;S100A8
CADMIUM 23973 human GSE9951 sample 3403	2/294	0.588619	0.756438	0	0	1.01533	0.538102	MYH9;ACTG1
morphine DB00295 mouse GSE50382 sample 3304	2/294	0.588619	0.755366	0	0	1.01533	0.538102	RPL13A;HBB-BT
dasatinib DB01254 human GSE59357 sample 3306	2/298	0.596002	0.763759	0	0	1.0017	0.518393	BST2;LCN2
vancomycin DB14969 mouse GSE7793 sample 3398	2/298	0.596002	0.76268	0	0	1.0017	0.518393	C3;ACTB
Colorectal Adenocarcinoma DB00482 human GSE11237 sample 2458	2/301	0.601474	0.768597	0	0	0.991719	0.504162	S100A9;S100A8
aminolevulinic acid DB00855 human GSE8920 sample 2575	2/304	0.606891	0.774427	0	0	0.981932	0.490383	HSP90AB1;S100A8
doxorubicin DB00997 human GSE24460 sample 2533	2/304	0.606891	0.773338	0	0	0.981932	0.490383	BST2;GPX1
VANADIUM PENTOXIDE 14814 human GSE5339 sample 3557	1/139	0.608465	0.774255	0	0	1.07377	0.533464	LARS2
HYPOCHLOROUS ACID 24341 mouse GSE15457 sample 3382	2/307	0.612252	0.777981	0	0	0.972337	0.477039	LCN2;S100A8
Perfluorooctanoic Acid 9554 mouse GSE13044 sample 3517	2/308	0.614027	0.779144	0	0	0.96918	0.472685	FABP1;FTL1
rosiglitazone DB00412 mouse GSE35011 sample 2813	2/310	0.617558	0.782528	0	0	0.962927	0.464113	MT1;GAPDH
formaldehyde 712 rat GSE7002 sample 3545	2/318	0.631437	0.798997	0	0	0.938703	0.431575	WFDC21;S100A8
TRICHLOROETHYLENE 6575 mouse GSE24278 sample 3311	2/322	0.63823	0.806466	0	0	0.927042	0.416295	HSP90AB1;LCN2
quercetin DB04216 human GSE15162 sample 3444	2/323	0.639913	0.807466	0	0	0.924172	0.412572	CD74;HIST1H3B
acetaminophen DB00316 mouse GSE37874 sample 3301	2/323	0.639913	0.806343	0	0	0.924172	0.412572	LCN2;MT1
formaldehyde 712 rat GSE7002 sample 3547	2/328	0.648235	0.815696	0	0	0.910084	0.394523	S100A9;S100A8
carboplatin DB00958 human GSE49577 sample 3175	2/336	0.661237	0.830902	0	0	0.888415	0.367487	RPL14;APOE
PD173074 1401 human GSE52452 sample 2578	1/161	0.66267	0.83155	0	0	0.927042	0.381457	CFB
etanercept DB00005 human GSE11903 sample 2607	2/338	0.664427	0.832601	0	0	0.883158	0.361062	BST2;CD74
TRICHLOROETHYLENE 6575 mouse GSE24278 sample 3316	2/341	0.669167	0.837383	0	0	0.875388	0.351662	PABPC1;GAPDH
doxycycline DB00254 human GSE41035 sample 3040	2/345	0.675404	0.844022	0	0	0.865239	0.339558	BST2;HAMP
vitamin c DB00126 mouse GSE32994 sample 3508	2/356	0.692067	0.863654	0	0	0.838504	0.308631	LYZ2;SAA1
bleomycin DB00290 human GSE3598 sample 3587	2/359	0.696488	0.867976	0	0	0.831497	0.300756	C3;HIST1H4H
etanercept DB00005 human GSE47751 sample 2591	2/360	0.697951	0.868603	0	0	0.829187	0.298181	APOC1;SAA2
azathioprine DB00993 human GSE38713 sample 3194	2/361	0.699407	0.869222	0	0	0.82689	0.295632	FABP1;TTR
carboplatin DB00958 human GSE49577 sample 3174	2/365	0.705175	0.87519	0	0	0.817829	0.285675	RPL14;APOE
Interferon beta-1a DB00060 human GSE26104 sample 3188	2/366	0.706603	0.875763	0	0	0.815594	0.283244	IFITM3;BST2
formaldehyde 712 rat GSE7002 sample 3541	2/367	0.708025	0.876326	0	0	0.813372	0.280837	S100A9;S100A8
Interferon-&Icirc;&sup2;-1b (Betaferon) DB00068 human GSE26104 sample 3343	2/370	0.712257	0.880361	0	0	0.806777	0.273753	IFITM3;BST2
[truncated: 95 more rows]

## Sheet: Drug Perturbations from GEO dow
Term	Overlap	P-value	Adjusted P-value	Old P-value	Old Adjusted P-value	Odds Ratio	Combined Score	Genes
[truncated: 787 more rows]

[truncated: 1 more sheets: DrugMatrix]
