# Supplementary material
Source: Preprints.org preprint supplement (doi:10.20944/preprints202004.0431.v3)
Supplement: Supplementary file 3 [file gene_additional.xlsx]

## Sheet: genes selected by TD based unsu
GSE33266	GSE50000
1110007F12Rik	1190002F15Rik
1110069O07Rik	1700122O11Rik
1190002H23Rik	2010317E24Rik
1200016E24Rik	2610002D18Rik
2310016F22Rik	2610318N02Rik
2310043N10Rik	2810417H13Rik
3000002C10Rik	4732416N19Rik
3526401B18Rik	4833422F24Rik
5830484A20Rik	4930547N16Rik
9530028C05	4931407G18Rik
9530080O11Rik	9030425E11Rik
Acaa1a	A430093F15Rik
Acaa2	Acsbg1
Acaa2	Adm
Acaa2	AI607873
Acaa2	AI662270
Acaa2	Aif1
Acaa2	Aif1
Acaa2	Apod
Acaa2	Apol6
Acaa2	Apol9a
Acaa2	Apol9b
Acta2	Arntl
Acta2	Asf1b
Acta2	Aspm
Acta2	Aurka
Acta2	Aurkb
Acta2	AW112010
Acta2	Batf
Acta2	Batf2
Acta2	BC100530
Acta2	Bcat1
Ahnak	Bcl11b
Akap2	Bcl11b
Aldh1a1	Bex2
Aldoa	Birc5
Aldoa	Bpifa1
Anapc5	Brca1
Anxa1	Brip1
Anxa3	Bub1
Anxa5	C1qb
Aplp2	Camk4
Apod	Car3
Apoe	Casc5
Apoe	Cck
Apoe	Ccl12
Apoe	Ccl2
Apoe	Ccl4
Apoe	Ccl5
Apoe	Ccl5
Apoe	Ccl7
Apoe	Ccl7
Apoe	Ccl8
Aqp1	Ccna2
Aqp5	Ccnb1
Arbp	Ccnb1
Arbp	Ccnb1
Atp11a	Ccnb2
Atp5b	Ccne1
Atp6v1g1	Ccnf
AW112010	Ccr5
BC006779	Ccrl1
BC013712	Cd226
Bmpr2	Cd247
Bst2	Cd27
C3	Cd274
C3	Cd28
C3	Cd3d
C3	Cd3g
C3	Cd48
C3	Cd48
C3	Cd5
C3	Cd52
C3	Cd6
C3	Cd72
Calcrl	Cd72
Calm2	Cd8a
Casp4	Cd8a
Cav1	Cd8a
Cbr2	Cd8b1
Ccl2	Cd96
Ccl2	Cdc20
Ccl2	Cdca2
Ccl2	Cdca3
Ccl2	Cdca3
Ccl2	Cdca5
Ccl2	Cdca8
Ccl2	Cdca8
Ccl2	Cdk1
Ccl2	Cdkn3
Ccl5	Cdkn3
Ccl5	Cenpa
Ccl7	Cenpe
Ccl7	Cenpe
Cd274	Cenpf
Cd47	Cenph
Cd74	Cenpk
Cd81	Cenpk
Cd9	Cenpp
Cd93	Cenpw
Cd97	Cep55
Cds2	Ces1g
Cebpd	Cfb
Cfb	Ch25h
Cfd	Chit1
Chchd2	Chl1
Chi3l1	Chl1
Chi3l3	Cidec
Clic4	Ckap2
Clic5	Ckap2
Col1a1	Ckap2l
Col1a1	Cks1b
Col1a1	Cks2
Col1a1	Cks2
Col1a1	Clca3
Col1a1	Clec4e
Col1a1	Cmpk2
Col1a1	Col2a1
Col1a1	Col5a3
Col1a1	Coro1a
Col1a2	Crtam
Col3a1	Cst7
Col6a3	Ctsw
Cotl1	Cxcl10
Cotl1	Cxcl11
Crip2	Cxcl13
Cst3	Cxcl5
Ctnna1	Cxcl9
Ctsd	Cxcr3
Ctsh	Cxcr6
Ctsl	Cyp2a22
Cxcl10	Cyp2a4
Cxcl9	Cyp2a4
Cxx1b	Cyp2a4
Cyb5	Cyp2a5
Cyp2b9	Cyp2e1
Cyp2f2	Cys1
Cyp4b1	Cytl1
D11Ertd759e	D14Ertd668e
D14Ertd668e	D2Ertd750e
D4Wsu53e	Dbp
Daxx	Dck
Dazap2	Dck
Dcn	Depdc1a
Ddx17	Depdc1b
Ddx5	Dhx58
Dynll1	Dlgap5
Ecm1	Dnase1l3
Eef1a1	Dscc1
Eef1a1	Dusp2
Eef1g	Dusp2
Egfl7	E2f8
Ehd4	Ect2
Eif1	Eln
Elovl1	Epsti1
Emp2	Epsti1
Erdr1	Esco2
Fasn	Exo1
Fau	F630043A04Rik
Fbxo2	Fabp1
Fcgr1	Fam26f
Fhl1	Fam54a
Flna	Fam54a
Fmo2	Fam64a
Fth1	Fanci
Ftl1	Fasl
Ftl2	Fbxo5
Gabarapl1	Fcgr1
Gbp2	Fcgr1
Gbp4	Fcgr4
Gbp5	Fignl1
Gclc	Fignl1
Gnb2l1	Foxm1
Gng5	Fst
Gpi1	Fyb
Gpi1	Fyb
Gpi1	Gatm
Gpi1	Gbp2
Gpi1	Gbp3
Gpi1	Gbp4
Gpi1	Gbp5
Gpi1	Gbp6
Gpi1	Gbp8
Gpi1	Gbp8
Gprc5a	Gbp9
Gpx1	Gdf3
Gpx3	Gfi1
Grn	Gimap7
Gsn	Glipr2
Gsta3	Gm12250
Gsta3	Gm129
Gstm1	Gm14446
Gstm3	Gm4951
Gsto1	Gm4955
Gstp1	Gpr171
Gyg	Gpr65
H2-Ab1	Gpr84
H2-K1	Grem1
H2-K1	Gsg2
H2-K1	Gsta2
H2-K1	Gtse1
H2-K1	Gzma
H2-K1	Gzmb
H2-K1	Gzmk
H2-K1	H2-Q10
H2-K1	Has2
H2-K1	Herc6
H2-Q1	Hist1h1b
H2-Q10	Hist1h1d
H2-Q2	Hist1h2ab
H2-T10	Hist1h2af
H2-T23	Hist1h2af
H2afj	Hist1h2ai
H2afz	Hist1h2ak
H3f3b	Hist1h2ao
H3f3b	Hist2h2ac
Hba-a1	Hk3
Hba-a1	Hlf
Hbb-b1	Hmgb2
Hbb-b1	Hmgb2
Hbb-b1	Hmmr
Hbb-b1	Hmmr
Hc	I830012O16Rik
Hint1	Icos
Hist1h2aa	Icos
Hist1h2ab	Ido1
Hist1h2af	Ifi204
Hist1h2af	Ifi204
Hist1h2ak	Ifi204
Hist1h4d	Ifi205
Hist1h4f	Ifi27l2a
Hist2h2ac	Ifi27l2a
Hist2h3c1	Ifi27l2a
Hist2h4	Ifi44
Hist3h2a	Ifi44
Hnrpa3	Ifi47
Hnrpab	Ifit1
Hnrpk	Ifit2
Hod	Ifit2
Hp	Ifit3
Hpgd	Ifng
Hpgd	Ifng
Hsd11b1	Igtp
Hsp90ab1	Iigp1
Hsp90b1	Il12rb1
Hsp90b1	Il18bp
Hspa5	Il18bp
Hspa8	Il1rn
Hspb1	Il2rb
Icam1	Il6
Icam1	Incenp
Icam1	Insl6
Icam1	Iqgap3
Icam1	Irf7
Icam1	Irg1
Icam1	Irg1
Icam1	Irgm1
Icam1	Irgm1
Icam1	Isg15
Ifi204	Itga4
Ifi204	Itk
Ifi205	Kcna6
Ifi27	Kcnn4
Ifi27	Kif11
Ifi27	Kif14
Ifi44	Kif15
Ifi47	Kif18b
Ifit1	Kif20a
Ifit2	Kif20a
Ifit2	Kif22
Ifit3	Kif23
Ifit3	Kif23
Ifitm3	Kif4
Ifitm7	Kif4
Igfbp6	Kifc1
Igfbp7	Kifc5b
Igtp	Klrc1
Iigp1	Klrc1
Iigp2	Klrc3
Inmt	Klrk1
Irf1	Kntc1
Irg1	Krt15
Irg1	Krt79
Irgm	Lag3
Irgm	Lair1
Isg15	Lat
Isg20	Lck
Isg20	Lcp2
Itm2b	Leo1
Itm2b	Lilrb4
Junb	Lmnb1
Junb	Lox
Krt19	Lpxn
Krt7	Lpxn
Krt8	Lrr1
Lamp3	Lrrc25
Laptm4a	Ly6f
Lars2	Mad2l1
Lasp1	Mad2l1
Lcn2	Mcm10
Ldha	Mcm5
Lgals1	Mefv
Lgals3bp	Melk
Lilrb3	Mis18bp1
Lilrb3	Mki67
LOC243642	Mki67
LOC380687	Mnda
LOC384179	Ms4a4b
LOC546797	Ms4a4b
LOC56628	Ms4a4b
LOC56628	Ms4a4b
LOC624863	Ms4a4c
LOC625603	Ms4a4c
LOC630499	Ms4a6b
LOC633908	Ms4a6c
LOC637313	Ms4a6d
LOC666448	Ms4a6d
LOC668299	Ms4a7
LOC670202	Ms4a7
LOC670529	Msr1
LOC670811	Msr1
LOC673334	Msr1
LOC674833	Mthfd2
Ltbp4	Mx1
Ly6a	Mx1
Ly6c	Mx2
Ly6c	Mxd3
Ly6e	Mxd3
Lyzs	Mybl2
Lyzs	Ncapd2
Lzp-s	Ncapd2
Malat1	Ncapg
Mcl1	Ncapg
Mfap4	Ncapg2
Mfge8	Ndc80
MGC68323	Neil3
MGC73635	Neil3
Mgp	Nfil3
Mgst1	Nfil3
Mgst1	Nkg7
Mpeg1	Nkg7
Ms4a4c	Nlrc3
Msln	Nmur2
Mt2	Nr1d1
Mtch1	Nr1d2
Myh14	Nrcam
Myh9	Nuf2
Myl6	Nusap1
Myl6	Oas1a
Myl9	Oas1f
Mylc2b	Oas2
Ndg2	Oas3
Nfkbia	Oas3
Nisch	Oasl1
Nme2	Oasl2
Nmi	Pbk
Npc2	Pdcd1
Nt5c3	Per2
Nupr1	Per3
Oas1f	Pglyrp2
Oasl1	Phf11
Oasl2	Pla1a
Pabpc1	Plac8
Parp14	Plin4
Pcolce	Plk1
Pdia6	Pole
Phf11	Prc1
Pigt	Pstpip1
Plac8	Ptpn22
Plac9	Ptprcap
Plunc	Pycard
Plvap	Pycard
Pmp22	Pyhin1
Por	Pyhin1
Ppap2b	Pyhin1
Ppid	Rac2
Prdx1	Rac2
Prdx6	Racgap1
Prelp	Racgap1
Prg1	Rad51
Psmb10	Rad51ap1
Psmb8	Rgs1
Psmb8	Rgs16
Psme1	Rrm2
Psme2b-ps	Rsad2
Psme2b-ps	Rsad2
Ptprb	Rsad2
Ptprf	Rtp4
Ptprz1	Runx3
Ptrf	S100a4
Pttg1	Saa1
Ramp2	Saa3
Ran	Serpina3f
Rarres2	Serpina3f
Retnla	Serpina3g
Retnla	Sgol1
Rhoc	Sgol2
Rpl10	Sgol2
Rpl10	Sh2d1a
Rpl11	Shcbp1
Rpl12	Ska1
Rpl13	Skap1
Rpl13	Sla2
Rpl13a	Slamf6
Rpl15	Slamf7
Rpl17	Slamf7
Rpl17	Slamf8
Rpl18a	Slc26a4
Rpl19	Slfn1
Rpl23	Slfn10-ps
Rpl23a	Slfn2
Rpl23a	Slfn4
Rpl26	Slfn8
Rpl28	Slfn9
Rpl3	Smc2
Rpl32	Snhg11
Rpl35	Socs1
Rpl35a	Spag5
Rpl36a	Spc24
Rpl37	Spc25
Rpl37a	Spn
Rpl38	Spn
Rpl39	Spon2
Rpl41	Spon2
Rpl5	Spp1
Rpl6	Stat1
Rpl7	Stat1
Rpl7	Stat1
Rpl7a	Stat1
Rpl8	Stat4
Rpl9	Stfa1
Rplp1	Stfa2l1
Rplp2	Stil
Rpn2	Tacc3
Rps11	Tap1
Rps11	Tbx21
Rps12	Tcap
Rps13	Tcstv3
Rps14	Tef
Rps16	Tef
Rps17	Tgtp1
Rps18	Thy1
Rps18	Thy1
Rps2	Timp1
Rps2	Timp1
Rps20	Tk1
Rps23	Tmem171
Rps25	Tnc
Rps26	Tnc
Rps27a	Tnc
Rps28	Tnc
Rps28	Tnf
Rps28	Tnxb
Rps3	Top2a
Rps3a	Top2a
Rps4x	Tpx2
Rps5	Traip
Rps7	Trav3n-3
Rps8	Trim30a
Rps8	Trim30a
Rps8	Trim30d
Rsad2	Trip13
Rsad2	Tyms
Rtp4	Tyms
S100a11	Tyms-ps
S100a4	Ubash3a
S100a6	Ubd
S100a8	Ube2c
S100a9	Uhrf1
Scd2	Uhrf1
Scgb1a1	Usp18
Scgb3a1	Wnt10a
Scgb3a2	Zap70
Scotin	Zbp1
Sdcbp	Zbtb32
Sdpr
Selenbp1
Selenbp2
Sepp1
Sepx1
Serinc3
Serinc3
Serpina3g
Sftpa1
Sftpc
Sftpd
Slc43a3
Sod1
Sod2
Son
Sparc
Sparc
Sparcl1
Sparcl1
Sphk1
Spna2
Spnb2
Spp1
Spp1
Spp1
Spp1
Spp1
Spp1
Spp1
Spp1
Spp1
Spp1
Sqstm1
Stat1
Stmn1
Tagln
Taldo1
Tapbp
Tegt
Tegt
Tgfbi
Tgfbr2
Tgm2
Tgoln1
Tgtp
Thbd
Timp2
Timp3
Tm4sf1
Tmem109
Tmsb4x
Tns1
Tor3a
Tpm3
Tpm4
Tpt1
Trafd1
Tspan7
Tspan9
Tuba1
Tuba4
Tuba6
Tubb2a
Tubb5
Tubb5
Txnip
Tyki
Uba52
Uba52
Ubb
Ubc
Ubc
Ubc
Ubc
Ubc
Ubc
Ubc
Ubc
Ubc
Ubc
Ubc
Ube1l
Usp18
Vegfa
Vim
Vwf
Wars
Wbscr1
Wfdc2
Xdh
Ybx1
Ybx1
Zbp1
Zfp313

## Sheet:  GSE33266 Virus PPI
Virus-Host PPI P-HIPSTer 2020 GSE33266
Term	Overlap	P-value	Adjusted P-value	Old P-value	Old Adjusted P-value	Odds Ratio	Combined Score	Genes
Vaccinia virus Ankara double-stranded RNA binding protein	12/65	8.33596e-09	5.5976e-05	0	0	8.87574	165.113	HSPA8;HIST3H2A;TPM4;H2AFJ;H2AFZ;STAT1;UBC;HIST1H2AA;SQSTM1;S100A8;HIST2H2AC;HIST1H2AB
Human betaherpesvirus 7 ribonucleotide reductase subunit 1 (gene: U28)	10/42	1.10513e-08	3.71047e-05	0	0	11.4469	209.715	HSPA8;HIST3H2A;HSPA5;H2AFJ;H2AFZ;STAT1;UBC;HIST1H2AA;HIST2H2AC;HIST1H2AB
Ectromelia virus ERPV interferon resistance and PKR inhibitor	11/65	9.0201e-08	0.0002019	0	0	8.13609	131.977	HSPA8;HIST3H2A;HSPA5;H2AFJ;H2AFZ;STAT1;UBC;HIST1H2AA;SQSTM1;HIST2H2AC;HIST1H2AB
Variola virus hypothetical protein (gene: A28L)	16/162	2.8862e-07	0.000484521	0	0	4.74834	71.5012	HSPA8;TPM4;H2AFZ;STAT1;ISG15;HIST2H2AC;ATP5B;MFAP4;TUBB2A;HIST3H2A;H2AFJ;FTH1;UBC;RPL35;HIST1H2AA;HIST1H2AB
Human papillomavirus 138 replication protein (gene: E1)	10/58	2.91281e-07	0.000391191	0	0	8.28912	124.743	HSPA8;HIST3H2A;H2AFJ;H2AFZ;TPM3;STAT1;UBC;HIST1H2AA;HIST2H2AC;HIST1H2AB
Variola virus double-strand RNA-binding protein (gene: E3L)	11/73	3.0893e-07	0.000345745	0	0	7.24447	108.596	EEF1A1;HSPA8;HIST3H2A;HSPA5;H2AFJ;STAT1;UBC;HIST1H2AA;SQSTM1;HIST2H2AC;HIST1H2AB
Human coronavirus 229E full_polyprotein 1..4085	13/107	3.48966e-07	0.000334758	0	0	5.84112	86.8475	HSPA8;HSP90AB1;HSPA5;STAT1;ISG15;UBB;UBC;RPL35;MYH9;FAU;RPS27A;SQSTM1;UBA52
Human parainfluenza virus 1 strain Washington/1964 phosphoprotein (gene: P)	12/102	1.39839e-06	0.00117377	0	0	5.65611	76.2454	HSPA8;HIST3H2A;HSPA5;H2AFJ;H2AFZ;STAT1;FTH1;UBC;ISG15;HIST1H2AA;HIST1H2AB;HIST2H2AC
Human respirovirus 1 phosphoprotein (gene: P)	12/102	1.39839e-06	0.00104335	0	0	5.65611	76.2454	HSPA8;HIST3H2A;HSPA5;H2AFJ;H2AFZ;STAT1;FTH1;UBC;ISG15;HIST1H2AA;HIST1H2AB;HIST2H2AC
Omsk hemorrhagic fever virus full_polyprotein 1..3414	11/85	1.48134e-06	0.000994723	0	0	6.22172	83.5114	HSPA8;HSP90AB1;HSPA5;STAT1;APLP2;UBC;PSME1;COL6A3;RPL13;RPS2;SQSTM1
Monkeypox virus cowpox A-type inclusion protein	21/301	1.49743e-06	0.000914113	0	0	3.3542	44.9858	HSPA8;TPM4;HSPA5;STAT1;H2AFZ;ISG15;RPL23A;IFIT3;HIST2H2AC;ATP5B;TUBB2A;HIST3H2A;H2AFJ;FTH1;UBC;RPS3;RPL13;RPS27A;HIST1H2AA;SQSTM1;HIST1H2AB
Human immunodeficiency virus 2 vpr protein	9/54	1.55243e-06	0.000868716	0	0	8.01282	107.177	HSPA8;HIST3H2A;HSPA5;H2AFJ;STAT1;UBC;HIST1H2AA;HIST2H2AC;HIST1H2AB
Human group 1 coronavirus associated with pneumonia ORF 1a	12/106	2.11389e-06	0.00109191	0	0	5.44267	71.1193	HSPA8;HSP90AB1;UBB;HSPA5;STAT1;UBC;RPL35;MYH9;ISG15;RPS27A;SQSTM1;UBA52
SARS coronavirus excised_polyprotein 1..4369 (gene: orf1ab)	16/194	3.20935e-06	0.00153934	0	0	3.96511	50.1564	HSPA8;HSP90AB1;TPM4;HSPA5;STAT1;TPM3;ISG15;UBB;UBC;RPL13;MYH9;PABPC1;FAU;RPS27A;UBA52;SQSTM1
Beilong virus phosphoprotein (gene: P/V/C)	6/21	3.25242e-06	0.001456	0	0	13.7363	173.573	HIST3H2A;H2AFZ;H2AFJ;HIST1H2AA;HIST2H2AC;HIST1H2AB
Human coronavirus 229E full_polyprotein 1..6758	12/112	3.79265e-06	0.00159173	0	0	5.1511	64.2983	HSPA8;HSP90AB1;UBB;HSPA5;STAT1;UBC;MYH9;ISG15;FAU;RPS27A;SQSTM1;UBA52
SARS coronavirus P2 full_polyprotein 1..4382	16/198	4.17957e-06	0.00165093	0	0	3.885	48.1169	HSPA8;HSP90AB1;TPM4;HSPA5;STAT1;TPM3;ISG15;UBB;UBC;RPL13;MYH9;PABPC1;FAU;RPS27A;UBA52;SQSTM1
SARS coronavirus nsp9-pp1a/pp1ab (gene: orf1ab)	5/13	4.26256e-06	0.00159017	0	0	18.4911	228.655	HSPA5;UBB;STAT1;UBC;ISG15
Human immunodeficiency virus vpr protein (gene: vpr)	8/46	4.27736e-06	0.00151171	0	0	8.3612	103.363	HSPA8;HIST3H2A;HSPA5;H2AFJ;STAT1;UBC;HIST2H2AC;HIST1H2AB
Human immunodeficiency virus 1 Vpr (gene: vpr)	8/47	5.06197e-06	0.00169956	0	0	8.18331	99.7852	HSPA8;HIST3H2A;HSPA5;H2AFJ;STAT1;UBC;HIST2H2AC;HIST1H2AB
Yaba-like disease virus 48L protein (gene: 48L)	8/47	5.06197e-06	0.00161863	0	0	8.18331	99.7852	UBB;HSPA5;STAT1;UBC;ISG15;RPS27A;SQSTM1;UBA52
Middle East respiratory syndrome-related coronavirus nsp1 protein (gene: orf1ab)	4/7	6.14468e-06	0.00187553	0	0	27.4725	329.668	UBB;STAT1;ISG15;UBA52
Human alphaherpesvirus 1 large tegument protein (gene: UL36)	11/100	7.44064e-06	0.00217234	0	0	5.28846	62.4491	HSPA8;TUBB2A;UBB;HSPA5;TPM3;STAT1;UBC;RPL13;ISG15;RPS27A;SQSTM1
Measles virus genotype D4 phosphoprotein (gene: C/P/V)	11/100	7.44064e-06	0.00208183	0	0	5.28846	62.4491	HSPA8;HSP90AB1;HIST3H2A;HSPA5;H2AFJ;H2AFZ;STAT1;UBC;HIST1H2AA;HIST1H2AB;HIST2H2AC
Measles virus strain MVi/Pennsylvania.USA/20.09 phosphoprotein (gene: P)	11/102	9.01815e-06	0.00242228	0	0	5.18477	60.2277	HSPA8;HSP90AB1;HIST3H2A;HSPA5;H2AFJ;H2AFZ;STAT1;UBC;HIST1H2AA;HIST1H2AB;HIST2H2AC
Enterovirus C109 3D	8/51	9.53229e-06	0.0024619	0	0	7.54148	87.1857	ATP5B;HIST3H2A;H2AFJ;UBC;HIST1H2AA;SQSTM1;HIST2H2AC;HIST1H2AB
Human rhinovirus A65 3D	6/25	9.89209e-06	0.0024602	0	0	11.5385	132.967	HIST3H2A;H2AFJ;UBC;HIST1H2AA;HIST2H2AC;HIST1H2AB
Human group 1 coronavirus associated with pneumonia ORF 1ab	11/103	9.91067e-06	0.00237679	0	0	5.13443	59.1584	HSPA8;HSP90AB1;UBB;HSPA5;STAT1;UBC;RPL35;MYH9;ISG15;RPS27A;SQSTM1
Rotavirus A NSP3 (gene: NSP3)	11/103	9.91067e-06	0.00229483	0	0	5.13443	59.1584	HSPA8;HIST3H2A;HSPA5;H2AFJ;H2AFZ;STAT1;UBC;PSME1;HIST1H2AA;HIST1H2AB;HIST2H2AC
Horsepox virus HSPV077 (Vaccinia virus I7 processing peptidase)	8/53	1.27954e-05	0.00286403	0	0	7.25689	81.7593	UBB;HSPA5;STAT1;UBC;ISG15;RPS27A;SQSTM1;UBA52
Orf virus ORF035 virion core protease	7/40	1.65032e-05	0.0035748	0	0	8.41346	92.6487	UBB;HSPA5;STAT1;UBC;ISG15;RPS27A;SQSTM1
Human papillomavirus 17 early protein (gene: E1)	9/73	2.00054e-05	0.004198	0	0	5.92729	64.1304	DAXX;HIST3H2A;H2AFJ;H2AFZ;STAT1;RPL13;HIST1H2AA;HIST2H2AC;HIST1H2AB
Human papillomavirus 173 E1	9/74	2.23624e-05	0.00455041	0	0	5.84719	62.6125	HIST3H2A;H2AFJ;H2AFZ;STAT1;UBC;HIST1H2AA;SQSTM1;HIST2H2AC;HIST1H2AB
Middle East respiratory syndrome-related coronavirus nsp3 protein (gene: orf1ab)	7/42	2.30412e-05	0.00455064	0	0	8.01282	85.5627	UBB;STAT1;UBC;MYH9;ISG15;SQSTM1;UBA52
Human rhinovirus A71 3D	6/29	2.47285e-05	0.00474434	0	0	9.94695	105.513	HIST3H2A;H2AFJ;UBC;HIST1H2AA;HIST2H2AC;HIST1H2AB
Influenza B virus nonstructural protein 1 (gene: NS1)	9/75	2.49511e-05	0.00465408	0	0	5.76923	61.1457	HSPA8;UBB;HSPA5;STAT1;UBC;ISG15;RPS27A;SQSTM1;UBA52
Measles morbillivirus phosphoprotein (gene: P/V/C)	10/94	2.59499e-05	0.00470955	0	0	5.11457	54.0065	HSPA8;HIST3H2A;HSPA5;H2AFJ;H2AFZ;STAT1;UBC;HIST1H2AA;HIST2H2AC;HIST1H2AB
Measles virus genotype G3 phosphoprotein (gene: C/P/V)	10/94	2.59499e-05	0.00458562	0	0	5.11457	54.0065	HSPA8;HIST3H2A;HSPA5;H2AFJ;H2AFZ;STAT1;UBC;HIST1H2AA;HIST2H2AC;HIST1H2AB
Measles virus strain Edmonston-Zagreb phosphoprotein (gene: P)	10/94	2.59499e-05	0.00446804	0	0	5.11457	54.0065	HSPA8;HIST3H2A;HSPA5;H2AFJ;H2AFZ;STAT1;UBC;HIST1H2AA;HIST2H2AC;HIST1H2AB
Measles virus strain MVi/Arizona.USA/11.08/2 phosphoprotein (gene: P)	10/94	2.59499e-05	0.00435634	0	0	5.11457	54.0065	HSPA8;HIST3H2A;HSPA5;H2AFJ;H2AFZ;STAT1;UBC;HIST1H2AA;HIST2H2AC;HIST1H2AB
Measles virus strain MVi/California.USA/16.03 phosphoprotein (gene: P)	10/94	2.59499e-05	0.00425008	0	0	5.11457	54.0065	HSPA8;HIST3H2A;HSPA5;H2AFJ;H2AFZ;STAT1;UBC;HIST1H2AA;HIST2H2AC;HIST1H2AB
Measles virus strain MVi/Florida.USA/19.09 phosphoprotein (gene: P)	10/94	2.59499e-05	0.00414889	0	0	5.11457	54.0065	HSPA8;HIST3H2A;HSPA5;H2AFJ;H2AFZ;STAT1;UBC;HIST1H2AA;HIST2H2AC;HIST1H2AB
Measles virus strain MVi/New Jersey.USA/45.05 phosphoprotein (gene: P)	10/94	2.59499e-05	0.00405241	0	0	5.11457	54.0065	HSPA8;HIST3H2A;HSPA5;H2AFJ;H2AFZ;STAT1;UBC;HIST1H2AA;HIST2H2AC;HIST1H2AB
Measles virus strain MVi/New York.USA/26.09/3 phosphoprotein (gene: P)	10/94	2.59499e-05	0.00396031	0	0	5.11457	54.0065	HSPA8;HIST3H2A;HSPA5;H2AFJ;H2AFZ;STAT1;UBC;HIST1H2AA;HIST2H2AC;HIST1H2AB
Human alphaherpesvirus 3 tegument host shutoff protein (gene: ORF17)	7/43	2.70334e-05	0.00403398	0	0	7.82648	82.3223	HIST3H2A;H2AFJ;H2AFZ;STAT1;UBC;HIST2H2AC;HIST1H2AB
Human enterovirus C118 3D	7/43	2.70334e-05	0.00394629	0	0	7.82648	82.3223	HIST3H2A;H2AFJ;UBC;HIST1H2AA;SQSTM1;HIST2H2AC;HIST1H2AB
Human herpesvirus 3 strain Dumas host shut-off factor	7/43	2.70334e-05	0.00386232	0	0	7.82648	82.3223	HIST3H2A;H2AFJ;H2AFZ;STAT1;UBC;HIST2H2AC;HIST1H2AB
Reston ebolavirus spike glycoprotein (gene: GP)	13/158	2.73856e-05	0.00383113	0	0	3.9557	41.5565	HSPA8;DAXX;HSP90AB1;TPM4;HSPA5;TPM3;STAT1;ISG15;RPL23A;IFIT1;FTH1;UBC;SQSTM1
Yaba-like disease virus 34L protein (gene: 34L)	9/76	2.77898e-05	0.00380834	0	0	5.69332	59.7277	HSPA8;HSP90AB1;HSPA5;RPS18;STAT1;RPS5;UBC;RPS3;SQSTM1
Human rhinovirus A20 3D	6/30	3.03717e-05	0.00407892	0	0	9.61538	100.019	HIST3H2A;H2AFJ;UBC;HIST1H2AA;HIST2H2AC;HIST1H2AB
Measles virus strain MVi/Washington.USA/18.08/1 phosphoprotein (gene: P)	10/96	3.12038e-05	0.0041085	0	0	5.00801	51.958	HSPA8;HIST3H2A;HSPA5;H2AFJ;H2AFZ;STAT1;UBC;HIST1H2AA;HIST2H2AC;HIST1H2AB
Middle East respiratory syndrome-related coronavirus nsp7 protein (gene: orf1ab)	7/44	3.15778e-05	0.00407779	0	0	7.6486	79.2629	HSPA8;UBB;HSPA5;STAT1;UBC;ISG15;UBA52
Human coronavirus NL63 full_polyprotein 1..6729	12/138	3.2189e-05	0.00407828	0	0	4.1806	43.2437	HSPA8;HSP90AB1;UBB;HSPA5;STAT1;UBC;MYH9;ISG15;FAU;RPS27A;SQSTM1;UBA52
Yaba monkey tumor virus IEV and EEV membrane glycoprotein	15/209	3.39529e-05	0.00422211	0	0	3.4505	35.5075	HSPA8;CXCL9;HSP90AB1;CD93;HSPA5;VWF;STAT1;SFTPD;C3;THBD;PTPRB;CCL5;UBC;PABPC1;SFTPA1
Measles virus strain MVi/California.USA/8.04 phosphoprotein (gene: P)	10/97	3.41554e-05	0.00417006	0	0	4.95638	50.9744	HSPA8;HIST3H2A;HSPA5;H2AFJ;H2AFZ;STAT1;UBC;HIST1H2AA;HIST1H2AB;HIST2H2AC
Menangle virus phosphoprotein (gene: V/P)	10/97	3.41554e-05	0.0040956	0	0	4.95638	50.9744	HSPA8;HIST3H2A;HSPA5;H2AFJ;H2AFZ;STAT1;UBC;HIST1H2AA;HIST1H2AB;HIST2H2AC
SARS coronavirus 3C-like proteinase (gene: orf1ab)	5/19	3.47381e-05	0.0040924	0	0	12.6518	129.905	UBB;STAT1;UBC;ISG15;PABPC1
Human enterovirus C104 3D	7/45	3.6732e-05	0.00425268	0	0	7.47863	76.3708	HIST3H2A;H2AFJ;UBC;HIST1H2AA;SQSTM1;HIST2H2AC;HIST1H2AB
SARS coronavirus nsp8-pp1a/pp1ab (gene: orf1ab)	7/45	3.6732e-05	0.0041806	0	0	7.47863	76.3708	UBB;TPM4;STAT1;TPM3;UBC;RPL13;ISG15
Measles virus genotype D8 phosphoprotein (gene: P/V/C)	10/98	3.73425e-05	0.00417925	0	0	4.90581	50.0166	HSPA8;HIST3H2A;HSPA5;H2AFJ;H2AFZ;STAT1;UBC;HIST1H2AA;HIST1H2AB;HIST2H2AC
Human alphaherpesvirus 3 large tegument protein (gene: ORF22)	9/79	3.80031e-05	0.00418345	0	0	5.47712	55.7452	HIST3H2A;UBB;STAT1;UBC;ISG15;RPS27A;SQSTM1;UBA52;HIST1H2AB
Human herpesvirus 3 strain Dumas Large tegument protein deneddylase (gene: ORF22)	9/79	3.80031e-05	0.00411598	0	0	5.47712	55.7452	HIST3H2A;UBB;STAT1;UBC;ISG15;RPS27A;SQSTM1;UBA52;HIST1H2AB
Measles virus strain MVi/Texas.USA/4.07 phosphoprotein (gene: P)	10/99	4.07803e-05	0.00434666	0	0	4.85625	49.0837	HSPA8;HIST3H2A;HSPA5;H2AFJ;H2AFZ;STAT1;UBC;HIST1H2AA;HIST1H2AB;HIST2H2AC
Measles virus strain MVi/Virginia.USA/15.09 phosphoprotein (gene: P)	10/99	4.07803e-05	0.00427874	0	0	4.85625	49.0837	HSPA8;HIST3H2A;HSPA5;H2AFJ;H2AFZ;STAT1;UBC;HIST1H2AA;HIST1H2AB;HIST2H2AC
Molluscum contagiosum virus subtype 1 MC049L (gene: MC049L)	8/62	4.14659e-05	0.00428375	0	0	6.20347	62.597	HSP90AB1;UBB;HSPA5;STAT1;UBC;ISG15;RPS27A;SQSTM1
Human betacoronavirus 2c Jordan-N3/2012 ORF1ab protein (gene: ORF1ab)	9/80	4.20448e-05	0.00427774	0	0	5.40865	54.5018	HSPA8;UBB;HSPA5;STAT1;UBC;MYH9;ISG15;SQSTM1;UBA52
Cowpox virus CPXV086 protein (gene: CPXV086 CDS)	7/46	4.25573e-05	0.00426525	0	0	7.31605	73.6336	UBB;HSPA5;STAT1;UBC;ISG15;RPS27A;SQSTM1
Human alphaherpesvirus 1 tegument protein VP22 (gene: UL49)	11/121	4.54355e-05	0.00448676	0	0	4.37063	43.7029	ACTA2;HSPA8;UBB;TPM3;STAT1;UBC;ISG15;RPS27A;SQSTM1;RPS13;PPID
Betacoronavirus England 1 ORF1b protein (gene: orf1ab)	9/81	4.64439e-05	0.00451987	0	0	5.34188	53.2974	HSPA8;UBB;HSPA5;STAT1;UBC;MYH9;ISG15;SQSTM1;UBA52
Human betacoronavirus 2c EMC/2012 ORF1ab (gene: orf1ab)	7/47	4.9119e-05	0.00471191	0	0	7.16039	71.0402	HSPA8;UBB;HSPA5;UBC;ISG15;SQSTM1;UBA52
Monkeypox virus viral core cysteine proteinase	7/47	4.9119e-05	0.00464555	0	0	7.16039	71.0402	UBB;HSPA5;STAT1;UBC;ISG15;RPS27A;SQSTM1
Monkeypox virus Zaire-96-I-16 I7L (gene: I7L)	7/47	4.9119e-05	0.00458103	0	0	7.16039	71.0402	UBB;HSPA5;STAT1;UBC;ISG15;RPS27A;SQSTM1
Variola virus hypothetical protein (gene: K7L)	7/47	4.9119e-05	0.00451827	0	0	7.16039	71.0402	UBB;HSPA5;STAT1;UBC;ISG15;RPS27A;SQSTM1
Human betacoronavirus 2c England-Qatar/2012 ORF1ab	9/82	5.12253e-05	0.00464835	0	0	5.27674	52.1303	HSPA8;UBB;HSPA5;STAT1;UBC;MYH9;ISG15;SQSTM1;UBA52
Japanese encephalitis virus hypothetical protein	9/82	5.12253e-05	0.00458637	0	0	5.27674	52.1303	HSPA8;HSP90AB1;HSPA5;STAT1;APLP2;UBC;COL6A3;PABPC1;SQSTM1
Human rhinovirus A80 3D	6/33	5.37424e-05	0.00474843	0	0	8.74126	85.938	HIST3H2A;H2AFJ;UBC;HIST1H2AA;HIST2H2AC;HIST1H2AB
SARS coronavirus 2-O-ribose methyltransferase (2-o-MT) (gene: orf1ab)	4/11	5.42211e-05	0.00472851	0	0	17.4825	171.721	UBB;STAT1;UBC;ISG15
Ebola virus - Mayinga, Zaire, 1976 virion spike glycoprotein precursor (gene: GP)	11/126	6.59071e-05	0.00567392	0	0	4.19719	40.4075	HSPA8;HSP90AB1;TPM4;UBB;HSPA5;TPM3;STAT1;FTH1;UBC;ISG15;SQSTM1
Zaire ebolavirus spike glycoprotein (gene: GP)	11/126	6.59071e-05	0.0056021	0	0	4.19719	40.4075	HSPA8;HSP90AB1;TPM4;UBB;HSPA5;TPM3;STAT1;FTH1;UBC;ISG15;SQSTM1
Karshi virus (Royal Farm virus) full_polyprotein 1..3416	9/85	6.81332e-05	0.00571893	0	0	5.0905	48.8385	HSPA8;HSP90AB1;HSPA5;STAT1;APLP2;UBC;COL6A3;RPL13;SQSTM1
Echovirus E4 3D	7/50	7.39404e-05	0.00612975	0	0	6.73077	64.0248	HIST3H2A;H2AFJ;UBC;HIST1H2AA;SQSTM1;HIST2H2AC;HIST1H2AB
Vaccinia virus Ankara 24.5k Kelch-like protein	5/22	7.47257e-05	0.00611931	0	0	10.9266	103.821	LGALS3BP;HSPA8;HSPA5;STAT1;UBC
Nipah henipavirus P phosphoprotein	20/361	7.52041e-05	0.00608428	0	0	2.66354	25.2911	HSPA8;TPM4;HSPA5;STAT1;TPM3;H2AFZ;HIST2H2AC;ATP5B;MFAP4;HIST3H2A;H2AFJ;FTH1;UBC;RPL35;PABPC1;HIST1H2AA;SQSTM1;PPID;GBP4;HIST1H2AB
Human papillomavirus 149 E1 (gene: E1)	6/35	7.60423e-05	0.00607886	0	0	8.24176	78.1667	HSPA8;HSPA5;STAT1;UBC;SQSTM1;S100A8
Human alphaherpesvirus 2 large tegument protein (gene: UL36)	10/107	7.93839e-05	0.00627132	0	0	4.49317	42.421	HSPA8;UBB;HSPA5;TPM3;STAT1;UBC;RPL13;ISG15;RPS27A;SQSTM1
Monkeypox virus Zaire-96-I-16 D18L (gene: D18L)	4/12	7.99976e-05	0.00624633	0	0	16.0256	151.178	LGALS3BP;HSPA8;HSPA5;UBC
Coxsackievirus A22 3d	7/51	8.41872e-05	0.0064979	0	0	6.59879	61.913	HIST3H2A;H2AFJ;UBC;HIST1H2AA;SQSTM1;HIST2H2AC;HIST1H2AB
Vaccinia virus viral core cysteine proteinase (gene: I7L)	7/51	8.41872e-05	0.00642406	0	0	6.59879	61.913	UBB;STAT1;UBC;ISG15;RPS27A;SQSTM1;UBA52
SARS coronavirus nsp7-pp1a/pp1ab (gene: orf1ab)	6/36	8.96632e-05	0.00676504	0	0	8.01282	74.6751	HSPA8;UBB;HSPA5;STAT1;UBC;ISG15
Bundibugyo ebolavirus spike glycoprotein (gene: GP)	11/131	9.38242e-05	0.00700033	0	0	4.03699	37.4394	HSPA8;HSP90AB1;TPM4;HSPA5;TPM3;STAT1;FTH1;UBC;ISG15;IFIT1;SQSTM1
Vaccinia virus Ankara 150k A-type inclusion protein (ATI) f1	16/257	0.000103133	0.0076103	0	0	2.99312	27.4753	HSPA8;DAXX;TPM4;STAT1;H2AFZ;HIST2H2AC;ATP5B;TUBB2A;HIST3H2A;H2AFJ;FTH1;UBC;CTNNA1;HIST1H2AA;SQSTM1;HIST1H2AB
Coxsackievirus A1 3D	7/53	0.000108157	0.0078943	0	0	6.34978	57.9857	HIST3H2A;H2AFJ;UBC;HIST1H2AA;SQSTM1;HIST2H2AC;HIST1H2AB
Human betacoronavirus 2c Jordan-N3/2012 ORF1a protein (gene: ORF1ab)	9/91	0.000116247	0.00839355	0	0	4.75486	43.078	HSPA8;UBB;HSPA5;STAT1;UBC;MYH9;ISG15;SQSTM1;UBA52
Salivirus FHB full_polyprotein 1..2365	7/54	0.000122069	0.00872014	0	0	6.23219	56.1578	STAT1;UBC;RPS20;SQSTM1;HIST2H2AC;ICAM1;HIST1H2AB
Monkeypox virus Zaire-96-I-16 Hypothetical protein (gene: C7L)	6/38	0.000122702	0.00867309	0	0	7.59109	68.3635	HSPA8;HSPA5;TPM4;STAT1;UBC;SQSTM1
Human betacoronavirus 2c EMC/2012 ORF1a (gene: orf1ab)	9/92	0.000126524	0.00885009	0	0	4.70318	42.2114	HSPA8;UBB;HSPA5;STAT1;UBC;MYH9;ISG15;SQSTM1;UBA52
Hendra henipavirus phosphoprotein P (gene: P/V/C)	21/405	0.000127217	0.00880683	0	0	2.49288	22.3602	HSPA8;TPM4;HSPA5;STAT1;TPM3;H2AFZ;RHOC;HIST2H2AC;MFAP4;ATP5B;HIST3H2A;H2AFJ;FTH1;UBC;CTNNA1;RPL13;PABPC1;HIST1H2AA;SQSTM1;S100A8;HIST1H2AB
Ectromelia virus ERPV hemagglutinin	16/262	0.000128954	0.00883601	0	0	2.936	26.2949	CD274;HSPA5;VWF;STAT1;ISG15;ICAM1;VEGFA;PTPRB;UBB;UBC;FLNA;RPL13;MYH9;CCL2;RPS27A;SQSTM1
Great Island virus VP5	6/39	0.000142491	0.00966495	0	0	7.39645	65.5047	HIST3H2A;H2AFJ;STAT1;HIST1H2AA;HIST2H2AC;HIST1H2AB
Coxsackievirus A11 vp4	4/14	0.000156514	0.0105099	0	0	13.7363	120.362	STAT1;UBC;SQSTM1;ICAM1
Human enterovirus C102 vp4	4/14	0.000156514	0.0104059	0	0	13.7363	120.362	STAT1;UBC;SQSTM1;ICAM1
Influenza B virus (B/Memphis/12/97) NS protein	8/75	0.00016358	0.010769	0	0	5.12821	44.7088	HSPA8;UBB;STAT1;UBC;ISG15;RPS27A;SQSTM1;UBA52
SARS coronavirus endoRNAse (gene: orf1ab)	3/6	0.000170535	0.0111179	0	0	24.0385	208.571	UBB;UBC;ISG15
Human rhinovirus A49 2C	5/26	0.000174301	0.0112542	0	0	9.24556	80.0178	HSPA8;HSPA5;STAT1;FTH1;UBC
Cowpox virus CPXV169 protein (gene: CPXV169 CDS)	11/143	0.00020457	0.0130827	0	0	3.69822	31.415	THBD;CXCL9;HSP90AB1;CD93;HSPA5;VWF;STAT1;CCL5;SFTPD;PABPC1;SFTPA1
Dengue virus 3 membrane glycoprotein M (gene: flavivirus polyprotein)	5/27	0.000210288	0.0133215	0	0	8.90313	75.3831	HSPA8;HSPA5;STAT1;TPM3;UBC
Enterovirus D 3D-POL	7/59	0.000215096	0.0134988	0	0	5.70404	48.1673	HIST3H2A;H2AFJ;UBC;HIST1H2AA;SQSTM1;HIST2H2AC;HIST1H2AB
Human enterovirus 94 3D	7/59	0.000215096	0.0133738	0	0	5.70404	48.1673	HIST3H2A;H2AFJ;UBC;HIST1H2AA;SQSTM1;HIST2H2AC;HIST1H2AB
Coxsackievirus A10 full_polyprotein 1..2193	8/78	0.000215363	0.0132675	0	0	4.93097	41.6331	DAXX;HSPA5;STAT1;UBC;FLNA;SQSTM1;ICAM1;TAPBP
Vaccinia virus Ankara viral core cysteine proteinase	6/42	0.000217374	0.0132697	0	0	6.86813	57.9251	UBB;HSPA5;STAT1;UBC;ISG15;SQSTM1
Echovirus 9 strain Barty polymerase	7/60	0.000239208	0.014471	0	0	5.60897	46.7686	HIST3H2A;H2AFJ;UBC;HIST1H2AA;SQSTM1;HIST2H2AC;HIST1H2AB
Lujo mammarenavirus large RNA-dependent RNA polymerase	7/60	0.000239208	0.0143418	0	0	5.60897	46.7686	HSPA8;HSP90AB1;HSPA5;STAT1;UBC;RPL35;RPL23A
Powassan virus non-structural protein NS3	6/43	0.000248241	0.0147516	0	0	6.70841	55.6872	HSPA5;STAT1;APLP2;UBC;COL6A3;RPS2
Middle East respiratory syndrome-related coronavirus nsp16 protein (gene: orf1ab)	4/16	0.000275334	0.0162181	0	0	12.0192	98.528	UBB;STAT1;ISG15;UBA52
SARS coronavirus nsp4-pp1a/pp1ab (gene: orf1ab)	4/16	0.000275334	0.0160771	0	0	12.0192	98.528	UBB;STAT1;UBC;ISG15
Vaccinia virus Ankara apoptosis inhibitor	6/44	0.000282451	0.0163505	0	0	6.55594	53.5752	HSPA8;HSPA5;TPM4;STAT1;UBC;SQSTM1
Wesselsbron virus full_polyprotein 1..3405	9/103	0.000299152	0.0171693	0	0	4.2009	34.0884	HSPA8;HSP90AB1;HSPA5;STAT1;APLP2;UBC;COL6A3;RPL13;SQSTM1
Human respirovirus 3 phosphoprotein	8/82	0.0003046	0.0173338	0	0	4.69043	37.9761	HSPA8;HSPA5;H2AFZ;STAT1;FTH1;UBC;HIST2H2AC;HIST1H2AB
Lymphocytic choriomeningitis mammarenavirus L protein	6/45	0.000320254	0.0180715	0	0	6.41026	51.5795	HSPA8;HSP90AB1;HSPA5;STAT1;UBC;RPL35
Cercopithecine betaherpesvirus 5 chemokine vCXCL9 (gene: UL146F)	7/63	0.000324871	0.0181792	0	0	5.34188	42.9064	CCL7;HSPA5;STAT1;CCL5;CCL2;PABPC1;SQSTM1
Middle East respiratory syndrome-related coronavirus nsp4 protein (gene: orf1ab)	4/17	0.000354165	0.0196547	0	0	11.3122	89.884	UBB;STAT1;ISG15;UBA52
Middle East respiratory syndrome-related coronavirus nsp10 protein (gene: orf1ab)	4/17	0.000354165	0.0194936	0	0	11.3122	89.884	UBB;STAT1;ISG15;UBA52
SARS coronavirus formerly known as growth-factor-like protein (gene: orf1ab)	4/17	0.000354165	0.0193351	0	0	11.3122	89.884	UBB;STAT1;UBC;ISG15
Human adenovirus E4 protein IVa2	7/65	0.00039451	0.021364	0	0	5.17751	40.5807	UBB;HSPA5;STAT1;UBC;ISG15;RPS27A;SQSTM1
Human mastadenovirus E encapsidation protein IVa2 (gene: IVa2)	7/65	0.00039451	0.0211931	0	0	5.17751	40.5807	UBB;HSPA5;STAT1;UBC;ISG15;RPS27A;SQSTM1
Human betaherpesvirus 5 chemokine vCXCL2 (gene: UL147)	10/131	0.000419449	0.0223539	0	0	3.66999	28.54	CXCL9;HSP90AB1;HSPA5;CCL7;CTSL;STAT1;CCL5;UBC;CCL2;SQSTM1
Molluscum contagiosum virus subtype 1 MC013L (gene: MC013L)	10/131	0.000419449	0.0221779	0	0	3.66999	28.54	HSPA8;DAXX;HSP90AB1;HSPA5;STAT1;UBC;ISG15;PDIA6;HIST1H2AB;HIST2H2AC
Coxsackievirus A2 full_polyprotein 1..2190	8/86	0.000421955	0.0221361	0	0	4.47227	34.7523	DAXX;HSPA5;STAT1;UBC;FLNA;SQSTM1;ICAM1;TAPBP
SARS coronavirus Tor2 replicase 1AB	9/108	0.000425713	0.0221602	0	0	4.00641	31.0967	UBB;HSPA5;STAT1;UBC;ISG15;FAU;RPS27A;SQSTM1;UBA52
Human adenovirus 11+34 protein IIIa precursor (gene: L1)	4/18	0.000447916	0.0231366	0	0	10.6838	82.3815	HSPA8;HSPA5;STAT1;UBC
Human adenovirus 14 protein IIIa precursor (gene: L1)	4/18	0.000447916	0.02296	0	0	10.6838	82.3815	HSPA8;HSPA5;STAT1;UBC
SARS coronavirus P2 full_polyprotein 1..7073	9/109	0.000455671	0.0231805	0	0	3.96965	30.5415	UBB;HSPA5;STAT1;UBC;ISG15;FAU;RPS27A;SQSTM1;UBA52
Echovirus E14 3D	6/48	0.000457854	0.0231165	0	0	6.00962	46.2077	HIST3H2A;H2AFJ;UBC;HIST1H2AA;HIST2H2AC;HIST1H2AB
Yaba monkey tumor virus 48L	6/48	0.000457854	0.022944	0	0	6.00962	46.2077	UBB;STAT1;UBC;ISG15;RPS27A;SQSTM1
Vaccinia virus Ankara CD47-like protein	7/67	0.000475598	0.0236566	0	0	5.02296	38.4304	UBB;HSPA5;STAT1;UBC;CD47;SQSTM1;ICAM1
Rotavirus A NSP4	10/134	0.000501956	0.0247841	0	0	3.58783	27.2567	HSPA8;DAXX;TPM4;UBB;STAT1;UBC;ISG15;FAU;RPS27A;SQSTM1
Echovirus E11 3D	6/49	0.000512708	0.0251302	0	0	5.88697	44.5985	HIST3H2A;H2AFJ;UBC;HIST1H2AA;HIST2H2AC;HIST1H2AB
Human papillomavirus 5 transforming protein (gene: E7)	5/33	0.000558026	0.0271532	0	0	7.28438	54.5681	HSPA5;STAT1;GSTP1;UBC;SQSTM1
Human rhinovirus A78 1D	5/33	0.000558026	0.0269579	0	0	7.28438	54.5681	HSPA5;STAT1;UBC;SQSTM1;ICAM1
Human adenovirus 41 IIIa	4/19	0.000558098	0.0267688	0	0	10.1215	75.8196	HSPA8;HSPA5;STAT1;UBC
Human mastadenovirus F capsid protein precursor pIIIa (gene: L1)	4/19	0.000558098	0.0265789	0	0	10.1215	75.8196	HSPA8;HSPA5;STAT1;UBC
Cercopithecine betaherpesvirus 5 chemokine vCXCL5 (gene: UL146B)	7/69	0.000569446	0.0269284	0	0	4.87737	36.4381	CXCL9;HSP90AB1;CCL7;STAT1;CCL5;CCL2;SQSTM1
Human gammaherpesvirus 8 K4.1 (gene: K4.1)	10/137	0.000597491	0.028057	0	0	3.50926	26.0485	RPS4X;CXCL9;HSPA5;CCL7;STAT1;CCL5;UBC;CCL2;ISG15;SQSTM1
Sudan ebolavirus spike glycoprotein (gene: GP)	10/138	0.000632492	0.0294944	0	0	3.48384	25.6614	HSPA8;DAXX;TPM4;HSPA5;TPM3;STAT1;FTH1;UBC;IFIT1;SQSTM1
Sudan ebolavirus - Nakisamata structural glycoprotein (gene: GP)	10/138	0.000632492	0.0292909	0	0	3.48384	25.6614	HSPA8;DAXX;TPM4;HSPA5;TPM3;STAT1;FTH1;UBC;IFIT1;SQSTM1
Alkhumra hemorrhagic fever virus envelope protein	6/51	0.000637654	0.0293277	0	0	5.65611	41.616	HSPA8;PTPRB;HSP90AB1;HSPA5;STAT1;RPL13
Horsepox virus HSPV060 (double-strand RNA-binding protein; Provisional)	6/51	0.000637654	0.0291282	0	0	5.65611	41.616	HSPA8;HSPA5;STAT1;UBC;SQSTM1;HIST2H2AC
Horsepox virus HSPV167 (E-class dimer interface [polypeptide binding])	6/51	0.000637654	0.0289314	0	0	5.65611	41.616	DAXX;HSPA5;STAT1;UBC;SQSTM1;SOD1
Powassan virus envelope protein	6/51	0.000637654	0.0287372	0	0	5.65611	41.616	HSPA8;HSP90AB1;HSPA5;STAT1;RPL13;SQSTM1
Vaccinia virus ATPase, nucleoside triphosphate phosphohydrolase-I, NPH-I (gene: D11L)	6/51	0.000637654	0.0285457	0	0	5.65611	41.616	HSPA8;DDX5;HSPA5;STAT1;UBC;PABPC1
Dengue virus 2 membrane glycoprotein precursor M (gene: flavivirus polyprotein)	5/34	0.000643183	0.0286025	0	0	7.07014	51.959	HSPA8;HSPA5;STAT1;UBC;APOE
Human TMEV-like cardiovirus protein 2B*	5/34	0.000643183	0.0284143	0	0	7.07014	51.959	STAT1;UBC;FLNA;SQSTM1;ICAM1
Human alphaherpesvirus 1 envelope glycoprotein E (gene: US8)	5/34	0.000643183	0.0282286	0	0	7.07014	51.959	HSP90AB1;HSPA5;STAT1;UBC;TAPBP
Saint Louis encephalitis virus full_polyprotein 1..3430	8/92	0.000664504	0.028975	0	0	4.1806	30.5872	HSPA8;HSP90AB1;HSPA5;STAT1;APLP2;UBC;COL6A3;SQSTM1
Human betaherpesvirus 5 membrane protein US20 (gene: US20)	3/9	0.000683612	0.0296159	0	0	16.0256	116.797	HSPA8;STAT1;UBC
SARS coronavirus RNA-dependent RNA polymerase (gene: orf1ab)	3/9	0.000683612	0.029426	0	0	16.0256	116.797	UBB;UBC;ISG15
Vaccinia virus hypothetical protein (gene: A49R)	3/9	0.000683612	0.0292386	0	0	16.0256	116.797	HSPA8;STAT1;UBC
SARS coronavirus leader protein (gene: orf1ab)	4/20	0.000686241	0.0291652	0	0	9.61538	70.0412	UBB;STAT1;UBC;ISG15
Variola virus Ribonucleoside-diphosphate reductase small chain (gene: C8L)	4/20	0.000686241	0.0289818	0	0	9.61538	70.0412	HSPA8;STAT1;UBC;RPL35
Vaccinia virus cowpox A-type inclusion protein	19/397	0.000705046	0.0295899	0	0	2.30091	16.6983	HSPA8;DAXX;TPM4;STAT1;TPM3;H2AFZ;IFIT1;RHOC;SOD2;HIST2H2AC;ATP5B;TUBB2A;HIST3H2A;H2AFJ;FTH1;UBC;RPL13;SQSTM1;HIST1H2AB
Norovirus Hu/GII.4/Berowra/NSW767L/2012/AU VP1	6/52	0.000708362	0.0295444	0	0	5.54734	40.2324	LGALS1;HSPA5;STAT1;UBC;FLNA;SQSTM1
Influenza B virus (B/Memphis/12/97) HA protein	8/93	0.0007141	0.0295999	0	0	4.13565	29.9607	HSPA8;TPM4;HSPA5;TPM3;STAT1;FTH1;UBC;SQSTM1
Saffold virus protein 2B*	5/35	0.000737707	0.0303908	0	0	6.86813	49.5327	STAT1;UBC;FLNA;DYNLL1;ICAM1
Molluscum contagiosum virus subtype 1 MC148R (gene: MC148R)	10/141	0.000747803	0.0306189	0	0	3.40971	24.5444	RPS4X;CXCL9;HSPA5;CCL7;STAT1;CCL5;UBC;CCL2;YBX1;SQSTM1
Dengue virus 1 envelope protein E (gene: flavivirus polyprotein)	6/53	0.000784985	0.0319465	0	0	5.44267	38.9143	HSPA8;HSP90AB1;STAT1;UBC;PSME1;SQSTM1
Enterovirus B 3D	6/53	0.000784985	0.031754	0	0	5.44267	38.9143	HIST3H2A;H2AFJ;UBC;HIST1H2AA;HIST2H2AC;HIST1H2AB
Langat virus nonstructural protein NS3	6/53	0.000784985	0.0315639	0	0	5.44267	38.9143	STAT1;APLP2;UBC;COL6A3;RPS2;SQSTM1
Modoc virus non-structural protein 3	7/73	0.000801065	0.0320188	0	0	4.61012	32.8681	DDX5;STAT1;APLP2;UBC;COL6A3;RPS2;SQSTM1
SARS coronavirus nsp3-pp1a/pp1ab (gene: orf1ab)	9/118	0.000811565	0.0322465	0	0	3.66688	26.0955	UBB;STAT1;UBC;MYH9;ISG15;FAU;RPS27A;SQSTM1;UBA52
Betacoronavirus England 1 ORF1a protein (gene: orf1ab)	8/95	0.00082223	0.0324781	0	0	4.04858	28.7591	HSPA8;UBB;HSPA5;STAT1;UBC;MYH9;ISG15;SQSTM1
Human betacoronavirus 2c England-Qatar/2012 ORF1a	8/95	0.00082223	0.0322882	0	0	4.04858	28.7591	HSPA8;UBB;HSPA5;STAT1;UBC;MYH9;ISG15;SQSTM1
Ntaya virus full_polyprotein 1..3427	8/95	0.00082223	0.0321005	0	0	4.04858	28.7591	HSPA8;HSP90AB1;HSPA5;STAT1;APLP2;UBC;COL6A3;SQSTM1
Tai Forest ebolavirus spike glycoprotein (gene: GP)	10/143	0.000833891	0.0323675	0	0	3.36202	23.8348	HSPA8;HSP90AB1;TPM4;TPM3;STAT1;FTH1;UBC;ISG15;IFIT1;SQSTM1
Cercopithecine betaherpesvirus 5 regulatory protein IE2 (gene: UL122)	5/36	0.00084223	0.0325033	0	0	6.67735	47.272	HSPA8;HSPA5;STAT1;FTH1;UBC
Cyclovirus PK5006 replication-association protein (gene: rep)	5/36	0.00084223	0.0323176	0	0	6.67735	47.272	HSPA5;STAT1;UBC;DYNLL1;SQSTM1
Horsepox virus HSPV099 (RNAP subunits)	5/36	0.00084223	0.032134	0	0	6.67735	47.272	HSPA8;HSP90AB1;STAT1;UBC;SQSTM1
Echovirus E31 3D	6/54	0.00086785	0.0329243	0	0	5.34188	37.6575	HIST3H2A;H2AFJ;UBC;HIST1H2AA;HIST2H2AC;HIST1H2AB
Human parechovirus 3 full_polyprotein 1..2177	6/54	0.00086785	0.0327394	0	0	5.34188	37.6575	HSPA8;HSPA5;STAT1;FTH1;UBC;SQSTM1
West Nile virus SA381/00 envelope protein	7/74	0.000869213	0.0326076	0	0	4.54782	32.0527	HSPA8;PTPRB;HSP90AB1;STAT1;UBC;PSME1;SQSTM1
Cercopithecine betaherpesvirus 5 chemokine vCXCL10 (gene: UL146G)	8/96	0.00088102	0.0328669	0	0	4.00641	28.1828	CXCL9;CCL7;HSPA5;STAT1;CCL5;UBC;CCL2;SQSTM1
Coxsackievirus A14 full_polyprotein 1..2192	7/75	0.000941852	0.0349422	0	0	4.48718	31.2652	DAXX;HSPA5;STAT1;UBC;FLNA;SQSTM1;ICAM1
Enterovirus H 3D	6/55	0.000957293	0.0353199	0	0	5.24476	36.4584	HIST3H2A;H2AFJ;UBC;HIST1H2AA;HIST2H2AC;HIST1H2AB
Vaccinia virus CD47-like putative membrane protein (gene: A38L)	6/55	0.000957293	0.0351269	0	0	5.24476	36.4584	PTPRB;HSPA5;STAT1;UBC;FLNA;CD47
Human papillomavirus type 112 E7 protein (gene: E7)	5/37	0.000957399	0.0349398	0	0	6.49688	45.1617	HSPA5;STAT1;GSTP1;UBC;SQSTM1
Human rhinovirus A34 1D	5/37	0.000957399	0.034751	0	0	6.49688	45.1617	HSPA5;STAT1;UBC;SQSTM1;ICAM1
Human rhinovirus A63 1D	5/37	0.000957399	0.0345641	0	0	6.49688	45.1617	HSPA5;STAT1;UBC;SQSTM1;ICAM1
Horsepox virus HSPV031 (putative virulence factor)	3/10	0.000961556	0.0345286	0	0	14.4231	100.196	HSPA8;STAT1;UBC
Rhinovirus C capsid protein VP4	3/10	0.000961556	0.034345	0	0	14.4231	100.196	STAT1;UBC;SQSTM1
Vaccinia virus putative virulence factor (gene: N1L)	3/10	0.000961556	0.0341632	0	0	14.4231	100.196	HSPA8;STAT1;UBC
Vaccinia virus Ankara inhibitor of TNF-R and TLR signalling	3/10	0.000961556	0.0339834	0	0	14.4231	100.196	HSPA8;STAT1;UBC
Variola virus hypothetical protein (gene: J6R)	3/10	0.000961556	0.0338055	0	0	14.4231	100.196	HSPA8;HSPA5;STAT1
Dengue virus 2 membrane glycoprotein M (gene: flavivirus polyprotein)	4/22	0.00100259	0.0350646	0	0	8.74126	60.3598	HSPA8;HSPA5;STAT1;UBC
Human adenovirus 12 protein VI	4/22	0.00100259	0.0348829	0	0	8.74126	60.3598	HSPA8;HSPA5;STAT1;UBC
Human adenovirus 18 protein IIIa precursor (gene: L1)	4/22	0.00100259	0.0347031	0	0	8.74126	60.3598	HSPA8;HSPA5;STAT1;UBC
Human mastadenovirus A pVI	4/22	0.00100259	0.0345252	0	0	8.74126	60.3598	HSPA8;HSPA5;STAT1;UBC
Human parechovirus 1 2C	4/22	0.00100259	0.034349	0	0	8.74126	60.3598	HSPA8;HSPA5;STAT1;GSTA3
Cowpox virus Ati or CPXV158 protein (gene: ati)	8/98	0.00100871	0.034383	0	0	3.92465	27.0765	HIST3H2A;TPM4;H2AFJ;H2AFZ;FTH1;HIST1H2AA;HIST1H2AB;HIST2H2AC
Variola virus hypothetical protein (gene: B22R)	7/76	0.00101919	0.0345648	0	0	4.42814	30.5043	LGALS3BP;HSPA8;HSPA5;STAT1;UBC;ISG15;HIST2H2AC
Human cyclovirus replication-associated protein	5/38	0.00108387	0.0365737	0	0	6.32591	43.1884	HSPA5;STAT1;UBC;DYNLL1;SQSTM1
Human mastadenovirus B encapsidation protein IVa2 (gene: IVa2)	7/77	0.00110143	0.0369804	0	0	4.37063	29.769	UBB;HSPA5;STAT1;UBC;ISG15;RPS27A;SQSTM1
Influenza A virus (A/New York/599/1996(H3N2)) HA2 (gene: HA)	7/77	0.00110143	0.0367964	0	0	4.37063	29.769	CD274;TUBB2A;TPM4;HSPA5;STAT1;UBC;SQSTM1
Influenza A virus (A/New York/602/1996(H3N2)) HA2 (gene: HA)	7/77	0.00110143	0.0366143	0	0	4.37063	29.769	CD274;TUBB2A;TPM4;HSPA5;STAT1;UBC;SQSTM1
West Nile virus H442 envelope protein	7/77	0.00110143	0.0364339	0	0	4.37063	29.769	HSPA8;PTPRB;HSP90AB1;STAT1;UBC;PSME1;SQSTM1
Ilheus virus full_polyprotein 1..3424	8/100	0.00115078	0.0378798	0	0	3.84615	26.0281	HSPA8;HSP90AB1;HSPA5;STAT1;APLP2;UBC;COL6A3;SQSTM1
Echovirus 9 strain Hill polyprotein region 11	6/57	0.0011573	0.0379085	0	0	5.06073	34.219	HIST3H2A;H2AFJ;UBC;HIST1H2AA;HIST2H2AC;HIST1H2AB
Echovirus E32 3D	6/57	0.0011573	0.0377245	0	0	5.06073	34.219	HIST3H2A;H2AFJ;UBC;HIST1H2AA;HIST2H2AC;HIST1H2AB
Norovirus Hu/GII.4/HS288/2012/USA capsid protein VP1 (gene: VP1)	6/57	0.0011573	0.0375422	0	0	5.06073	34.219	LGALS1;HSPA5;STAT1;UBC;FLNA;SQSTM1
Norovirus Hu/GII.4/NIHIC17.1/2012/USA capsid protein VP1 (gene: VP1)	6/57	0.0011573	0.0373617	0	0	5.06073	34.219	LGALS1;HSPA5;STAT1;UBC;FLNA;SQSTM1
Norovirus Hu/GII.4/NIHIC17.5/2012/USA capsid protein VP1 (gene: VP1)	6/57	0.0011573	0.037183	0	0	5.06073	34.219	LGALS1;HSPA5;STAT1;UBC;FLNA;SQSTM1
Norovirus Hu/GII.4/NIHIC17.6/2012/USA capsid protein VP1 (gene: VP1)	6/57	0.0011573	0.0370059	0	0	5.06073	34.219	LGALS1;HSPA5;STAT1;UBC;FLNA;SQSTM1
Norovirus Hu/GII.4/NIHIC17.8/2013/USA capsid protein VP1 (gene: VP1)	6/57	0.0011573	0.0368305	0	0	5.06073	34.219	LGALS1;HSPA5;STAT1;UBC;FLNA;SQSTM1
Norovirus Hu/GII.4/NIHIC17.9/2013/USA capsid protein VP1 (gene: VP1)	6/57	0.0011573	0.0366568	0	0	5.06073	34.219	LGALS1;HSPA5;STAT1;UBC;FLNA;SQSTM1
Norovirus Hu/GII.4/NIHIC35/2013/USA capsid protein VP1 (gene: VP1)	6/57	0.0011573	0.0364847	0	0	5.06073	34.219	LGALS1;HSPA5;STAT1;UBC;FLNA;SQSTM1
Norovirus Hu/GII.4/Ohio/684/USA VP1	6/57	0.0011573	0.0363142	0	0	5.06073	34.219	LGALS1;HSPA5;STAT1;UBC;FLNA;SQSTM1
Norovirus Hu/GII.4/Rockdale/NSW006D/2009/AU VP1	6/57	0.0011573	0.0361453	0	0	5.06073	34.219	LGALS1;HSPA5;STAT1;UBC;FLNA;SQSTM1
Human adenovirus 12 hexon-associated protein	4/23	0.0011939	0.0371161	0	0	8.3612	56.2753	HSPA8;HSPA5;STAT1;UBC
Human adenovirus 21 protein IIIa precursor (gene: L1)	4/23	0.0011939	0.036945	0	0	8.3612	56.2753	HSPA8;HSPA5;STAT1;UBC
Human adenovirus 50 protein IIIa precursor (gene: L1)	4/23	0.0011939	0.0367755	0	0	8.3612	56.2753	HSPA8;HSPA5;STAT1;UBC
Human mastadenovirus A pIIIa	4/23	0.0011939	0.0366076	0	0	8.3612	56.2753	HSPA8;HSPA5;STAT1;UBC
Cyclovirus PK5034 replication-association protein (gene: rep)	5/39	0.00122231	0.0373081	0	0	6.16371	41.3401	HSPA5;STAT1;UBC;DYNLL1;SQSTM1
Human calicivirus NLV/GII/Langen1061/2002/DE major structural protein	5/39	0.00122231	0.0371393	0	0	6.16371	41.3401	HSPA5;STAT1;UBC;FLNA;SQSTM1
Norovirus Hu/GII.4/Ohio/7I/2012/USA major capsid protein	5/39	0.00122231	0.036972	0	0	6.16371	41.3401	HSPA5;STAT1;UBC;FLNA;SQSTM1
Echovirus E17 3D	6/58	0.00126856	0.0381991	0	0	4.97347	33.1724	HIST3H2A;H2AFJ;UBC;HIST1H2AA;HIST2H2AC;HIST1H2AB
Echovirus E13 VP4	3/11	0.00130181	0.0390252	0	0	13.1119	87.1154	STAT1;UBC;SQSTM1
Human betaherpesvirus 5 chemokine vCXCL1 (gene: UL146)	9/127	0.00136666	0.0407873	0	0	3.40703	22.4706	CXCL9;HSP90AB1;HSPA5;CCL7;STAT1;CCL5;UBC;CCL2;SQSTM1
West Nile virus lineage 2 excised_polyprotein 1..2273 (gene: flavivirus polyprotein)	9/127	0.00136666	0.0406068	0	0	3.40703	22.4706	HSPA8;HSP90AB1;HSPA5;STAT1;APLP2;UBC;COL6A3;RPL13;SQSTM1
Cowpox virus CPXV048 (gene: CPXV048 CDS)	5/40	0.00137339	0.0406269	0	0	6.00962	39.6062	HSPA8;HSPA5;STAT1;UBC;SQSTM1
Horsepox virus HSPV041 (Hypothetical protein)	5/40	0.00137339	0.0404488	0	0	6.00962	39.6062	HSPA8;HSPA5;STAT1;UBC;SQSTM1
Influenza A virus (A/New York/392/2004(H3N2)) HA2 (gene: HA)	7/80	0.00137974	0.0404582	0	0	4.20673	27.705	CD274;TUBB2A;TPM4;HSPA5;STAT1;UBC;SQSTM1
Echovirus E3 3D	6/59	0.00138782	0.0405184	0	0	4.88918	32.1709	HIST3H2A;H2AFJ;UBC;HIST1H2AA;HIST2H2AC;HIST1H2AB
Cyclovirus PK5222 replication-association protein (gene: rep)	4/24	0.00140938	0.0409696	0	0	8.01282	52.601	STAT1;UBC;DYNLL1;SQSTM1
Human adenovirus 52 pVI (gene: pVI)	4/24	0.00140938	0.040793	0	0	8.01282	52.601	HSPA8;HSPA5;STAT1;UBC
Monkeypox virus BTB domain of kelch-like protein	4/24	0.00140938	0.0406179	0	0	8.01282	52.601	HSPA8;HSPA5;STAT1;UBC
Monkeypox virus Zaire-96-I-16 D12L (gene: D12L)	4/24	0.00140938	0.0404443	0	0	8.01282	52.601	HSPA8;HSPA5;STAT1;UBC
Vaccinia virus C-type lectin-like type-II membrane protein (gene: A40R)	10/154	0.00146536	0.0418718	0	0	3.12188	20.3723	HSPA8;THBD;CXCL9;CD93;HSPA5;VWF;STAT1;UBC;SFTPD;SFTPA1
Vaccinia virus Ankara C-type lectin-like protein	10/154	0.00146536	0.0416944	0	0	3.12188	20.3723	HSPA8;THBD;CXCL9;CD93;HSPA5;VWF;STAT1;UBC;SFTPD;SFTPA1
Echovirus E6 3D	6/60	0.00151545	0.0429377	0	0	4.80769	31.2118	HIST3H2A;H2AFJ;UBC;HIST1H2AA;HIST2H2AC;HIST1H2AB
Cowpox virus CPXV175 protein (gene: CPXV175 CDS)	5/41	0.0015378	0.0433881	0	0	5.86304	37.9772	HSPA5;STAT1;UBC;FLNA;CD47
Norovirus Hu/GII.4/Jannali/NSW774M/2011/AU VP1	5/41	0.0015378	0.0432065	0	0	5.86304	37.9772	HSPA5;STAT1;UBC;FLNA;SQSTM1
Norovirus Hu/GII.4/Seoul/1071/2010/KOR major capsid protein	5/41	0.0015378	0.0430265	0	0	5.86304	37.9772	HSPA5;STAT1;UBC;FLNA;SQSTM1
Norovirus Hu/GII/Seoul1055/KOR/2010 major capsid protein	5/41	0.0015378	0.042848	0	0	5.86304	37.9772	HSPA5;STAT1;UBC;FLNA;SQSTM1
Hepatitis C virus subtype 1g full_polyprotein 1..3015	7/82	0.00159383	0.0442256	0	0	4.10413	26.4372	HSPA8;HSP90AB1;HSPA5;STAT1;RPS13;HIST2H2AC;HIST1H2AB
Human immunodeficiency virus 1 reverse transcriptase p51 subunit (gene: gag-pol)	4/25	0.00165055	0.045611	0	0	7.69231	49.2819	HSPA5;STAT1;UBC;SQSTM1
Middle East respiratory syndrome-related coronavirus nsp13 protein (gene: orf1ab)	4/25	0.00165055	0.045424	0	0	7.69231	49.2819	UBB;STAT1;ISG15;UBA52
Human gammaherpesvirus 8 ORF64 (gene: ORF64)	6/61	0.00165181	0.0452731	0	0	4.72888	30.2926	UBB;UBC;ISG15;RPS27A;SQSTM1;UBA52
Coxsackievirus A13 vp4	3/12	0.00170908	0.0466524	0	0	12.0192	76.5841	STAT1;UBC;SQSTM1
Enterovirus C109 VP4	3/12	0.00170908	0.0464635	0	0	12.0192	76.5841	STAT1;UBC;SQSTM1
Monkeypox virus Zaire-96-I-16 B2R (gene: B2R)	27/702	0.00170909	0.0462764	0	0	1.84911	11.7822	CD274;ICAM1;C3;CCL7;UBB;CCL5;UBC;FLNA;RPL13;CCL2;IGFBP7;RPS27A;TPM4;VWF;HSPA5;STAT1;ISG15;RHOC;LILRB3;PDIA6;VEGFA;PTPRB;LCN2;COL6A3;MFGE8;UBA52;SQSTM1
Coxsackievirus A5 full_polyprotein 1..2191	7/83	0.00171014	0.0461189	0	0	4.05468	25.8331	DAXX;HSPA5;STAT1;UBC;FLNA;SQSTM1;ICAM1
Dengue virus 3 nonstructural protein NS3 (gene: flavivirus polyprotein)	5/42	0.00171624	0.0460983	0	0	5.72344	36.4447	STAT1;APLP2;UBC;COL6A3;SQSTM1
Norovirus Hu/GII-4/CGMH01/2006/TW major viral capsid protein (gene: VP1)	5/42	0.00171624	0.0459146	0	0	5.72344	36.4447	HSPA5;STAT1;UBC;FLNA;SQSTM1
Norovirus Hu/GII.4/JB-15/KOR/2008 capsid protein	5/42	0.00171624	0.0457324	0	0	5.72344	36.4447	HSPA5;STAT1;UBC;FLNA;SQSTM1
Papiine alphaherpesvirus 2 ribonucleotide reductase subunit 2 (gene: UL40)	5/42	0.00171624	0.0455516	0	0	5.72344	36.4447	HSPA8;HSPA5;STAT1;FTH1;UBC
Vaccinia virus Hypothetical protein (gene: F1L)	5/42	0.00171624	0.0453723	0	0	5.72344	36.4447	HSPA8;HSPA5;STAT1;UBC;SQSTM1
Echovirus E21 3D	6/62	0.0017973	0.0473288	0	0	4.65261	29.4113	HIST3H2A;H2AFJ;UBC;HIST1H2AA;HIST2H2AC;HIST1H2AB
Human adenovirus 11a IVa2	7/84	0.00183294	0.0480788	0	0	4.00641	25.2477	CLIC5;CLIC4;UBB;STAT1;UBC;ISG15;SQSTM1
Coxsackievirus A20 full_polyprotein 1..2208	8/108	0.00188634	0.0492871	0	0	3.56125	22.3402	ATP5B;STAT1;UBC;HP;FLNA;SQSTM1;CFB;ICAM1
Japanese encephalitis virus non-structural protein NS3	5/43	0.0019094	0.0496962	0	0	5.59034	35.0009	STAT1;APLP2;UBC;COL6A3;SQSTM1
Norovirus Hu/GII/Seoul1072/KOR/2010 major capsid protein	5/43	0.0019094	0.0495044	0	0	5.59034	35.0009	HSPA5;STAT1;UBC;FLNA;SQSTM1
Seoul virus RNA-dependent RNA polymerase (gene: L)	5/43	0.0019094	0.049314	0	0	5.59034	35.0009	HSPA8;HSPA5;STAT1;UBC;SQSTM1
Seoul virus 80-39 RNA-dependent RNA polymerase (gene: L)	5/43	0.0019094	0.049125	0	0	5.59034	35.0009	HSPA8;HSPA5;STAT1;UBC;SQSTM1
West Nile virus H442 non-structural protein 3	5/43	0.0019094	0.0489375	0	0	5.59034	35.0009	STAT1;APLP2;UBC;COL6A3;SQSTM1
West Nile virus SA381/00 non-structural protein 3	5/43	0.0019094	0.0487514	0	0	5.59034	35.0009	STAT1;APLP2;UBC;COL6A3;SQSTM1
West Nile virus SA93/01 non-structural protein 3	5/43	0.0019094	0.0485668	0	0	5.59034	35.0009	STAT1;APLP2;UBC;COL6A3;SQSTM1
West Nile virus SPU116/89 non-structural protein 3	5/43	0.0019094	0.0483835	0	0	5.59034	35.0009	STAT1;APLP2;UBC;COL6A3;SQSTM1
West Nile virus lineage 1 nonstructural protein NS3 (gene: flavivirus polyprotein)	5/43	0.0019094	0.0482016	0	0	5.59034	35.0009	STAT1;APLP2;UBC;COL6A3;SQSTM1
Human cosavirus B VP3	4/26	0.00191896	0.0482616	0	0	7.39645	46.272	HSPA5;STAT1;FLNA;ICAM1
Human immunodeficiency virus pol protein (gene: pol)	13/245	0.00195131	0.048892	0	0	2.55102	15.9165	HSPA8;HSP90AB1;TPM4;HSPA5;STAT1;ISG15;HIST2H2AC;HIST3H2A;H2AFJ;UBC;HIST1H2AA;SQSTM1;HIST1H2AB
Alkhumra hemorrhagic fever virus non-structural protein NS3	6/63	0.00195229	0.0487347	0	0	4.57875	28.5657	STAT1;APLP2;UBC;COL6A3;RPS2;SQSTM1
Enterovirus C99 full_polyprotein 1..2210	7/85	0.00196246	0.0488072	0	0	3.95928	24.6804	HSPA5;STAT1;HP;FLNA;SQSTM1;CFB;ICAM1
Lake Victoria marburgvirus - DRC1999 glycoprotein (gene: GP)	7/86	0.00209896	0.0520094	0	0	3.91324	24.1302	HSPA8;TPM4;HSPA5;TPM3;STAT1;UBC;RPL23A
Cercopithecine alphaherpesvirus 2 tegument protein VP22 (gene: UL49)	6/64	0.00211718	0.0522679	0	0	4.50721	27.7539	HSPA8;UBB;STAT1;UBC;ISG15;RPS27A
Human adenovirus 14 IVa2 protein (gene: IVa2)	6/64	0.00211718	0.0520765	0	0	4.50721	27.7539	UBB;HSPA5;STAT1;UBC;ISG15;SQSTM1
Human adenovirus 55 pIVa2 50.9 kDa protein	6/64	0.00211718	0.0518864	0	0	4.50721	27.7539	UBB;HSPA5;STAT1;UBC;ISG15;SQSTM1
Molluscum contagiosum virus subtype 1 MC098R (gene: MC098R)	5/44	0.00211799	0.0517173	0	0	5.46329	33.639	HSP90AB1;STAT1;UBC;MYH9;SQSTM1
Norovirus Hu/GII/BG1C0004/2010/BGD capsid protein VP1 (gene: VP1)	5/44	0.00211799	0.05153	0	0	5.46329	33.639	HSPA5;STAT1;UBC;FLNA;SQSTM1
Variola virus hypothetical protein (gene: A35L)	5/44	0.00211799	0.0513439	0	0	5.46329	33.639	UBB;STAT1;UBC;ISG15;SQSTM1
Coxsackievirus B5 polyprotein region 2 (gene: 1A)	3/13	0.00218771	0.0528435	0	0	11.0947	67.9538	STAT1;UBC;SQSTM1
Echovirus E15 VP4	3/13	0.00218771	0.0526541	0	0	11.0947	67.9538	STAT1;UBC;SQSTM1
Echovirus E26 VP4	3/13	0.00218771	0.052466	0	0	11.0947	67.9538	STAT1;UBC;SQSTM1
Human rhinovirus A47 2C	3/13	0.00218771	0.0522793	0	0	11.0947	67.9538	NFKBIA;STAT1;UBC
Human papillomavirus 98 E7 protein (gene: E7)	4/27	0.00221613	0.0527705	0	0	7.12251	43.5327	STAT1;UBC;HP;SQSTM1
Human poliovirus 1 enterovirus precursor polypeptide	8/111	0.00224235	0.0532063	0	0	3.465	21.1373	HSPA5;STAT1;UBC;HP;FLNA;SQSTM1;CFB;ICAM1
Human betaherpesvirus 6 U85, OX-2 homologue (gene: U85)	19/439	0.00225191	0.0532449	0	0	2.08078	12.6844	CD274;HSP90AB1;VWF;HSPA5;STAT1;ISG15;PTPRF;ICAM1;VEGFA;TAPBP;PTPRB;UBB;UBC;LCN2;FLNA;RPL13;CCL2;IGFBP7;SQSTM1
Human betaherpesvirus 6A membrane glycoprotein UL119 (gene: U85)	19/439	0.00225191	0.0530581	0	0	2.08078	12.6844	CD274;HSP90AB1;VWF;HSPA5;STAT1;ISG15;PTPRF;ICAM1;VEGFA;TAPBP;PTPRB;UBB;UBC;LCN2;FLNA;RPL13;CCL2;IGFBP7;SQSTM1
Human enterovirus 71 HZ08/Hangzhou/2008 full_polyprotein 1..2193	6/65	0.00229237	0.0538226	0	0	4.43787	26.9741	HSPA5;STAT1;UBC;FLNA;SQSTM1;ICAM1
Vaccinia virus hemagglutinin (gene: A56R)	23/576	0.0023101	0.0540499	0	0	1.91974	11.6537	CD274;VWF;HSPA5;STAT1;ISG15;RHOC;PTPRF;ICAM1;VEGFA;PTPRB;CCL7;UBB;CCL5;UBC;FLNA;RPL13;CCL2;IGFBP7;CD47;RPS27A;MFGE8;UBA52;SQSTM1
Horsepox virus HSPV002 (chemokine binding protein; Provisional)	5/45	0.0023427	0.0546224	0	0	5.34188	32.3528	CCL7;STAT1;CCL5;CCL2;SQSTM1
Aichi virus 1 3D	5/46	0.00258426	0.0600461	0	0	5.22575	31.1367	HSPA8;HSPA5;STAT1;UBC;ISG15
Coxsackievirus A6 VP1 protein	5/46	0.00258426	0.0598391	0	0	5.22575	31.1367	DAXX;STAT1;UBC;SQSTM1;ICAM1
Cyclovirus NG14 replication-association protein (gene: rep)	5/46	0.00258426	0.0596334	0	0	5.22575	31.1367	HSPA5;STAT1;UBC;DYNLL1;SQSTM1
Horsepox virus HSPV117	5/46	0.00258426	0.0594292	0	0	5.22575	31.1367	HSPA8;DDX5;STAT1;UBC;PABPC1
Human papillomavirus 154 E1	5/46	0.00258426	0.0592264	0	0	5.22575	31.1367	H2AFZ;STAT1;UBC;SQSTM1;HIST2H2AC
Monkeypox virus chemokine-binding protein	5/46	0.00258426	0.0590249	0	0	5.22575	31.1367	CCL7;STAT1;CCL5;CCL2;SQSTM1
Vaccinia virus Ankara early gene termination factor/Nucleoside triphosphatase I	5/46	0.00258426	0.0588248	0	0	5.22575	31.1367	HSPA8;DDX5;STAT1;UBC;PABPC1
West Nile virus lineage 2 nonstructural protein NS3 (gene: flavivirus polyprotein)	5/46	0.00258426	0.0586261	0	0	5.22575	31.1367	STAT1;APLP2;UBC;COL6A3;SQSTM1
Betacoronavirus England 1 NS3B protein (gene: ns3b)	6/67	0.00267524	0.0604856	0	0	4.3054	25.504	HSPA8;HSP90AB1;HSPA5;STAT1;UBC;SQSTM1
Human betacoronavirus 2c England-Qatar/2012 ORF4a	6/67	0.00267524	0.0602826	0	0	4.3054	25.504	HSPA8;HSP90AB1;HSPA5;STAT1;UBC;SQSTM1
Vaccinia virus Ankara Haemagglutinin	19/446	0.00268282	0.0602513	0	0	2.04812	12.1267	CD274;VWF;HSPA5;STAT1;ISG15;PTPRF;ICAM1;VEGFA;TAPBP;UBB;CCL5;UBC;FLNA;RPL13;CCL2;RPS27A;MFGE8;UBA52;SQSTM1
Trichodysplasia spinulosa-associated polyomavirus large T antigen (gene: T)	7/90	0.00271974	0.0608768	0	0	3.73932	22.089	HSPA8;HSPA5;STAT1;UBC;NME2;RPS20;SQSTM1
Coxsackievirus A18 VP4 protein	3/14	0.00274168	0.061164	0	0	10.3022	60.7746	STAT1;UBC;SQSTM1
Echovirus E11 1A(VP4)	3/14	0.00274168	0.0609615	0	0	10.3022	60.7746	STAT1;UBC;SQSTM1
Echovirus E4 VP4	3/14	0.00274168	0.0607603	0	0	10.3022	60.7746	STAT1;UBC;SQSTM1
Human adenovirus 11+34 L3 23.7 kDa protein (gene: L3)	3/14	0.00274168	0.0605604	0	0	10.3022	60.7746	STAT1;UBC;DYNLL1
Human adenovirus 11a L3 23 kDa protease	3/14	0.00274168	0.0603618	0	0	10.3022	60.7746	STAT1;UBC;DYNLL1
Human adenovirus 14 23 kDa protein (gene: L3)	3/14	0.00274168	0.0601646	0	0	10.3022	60.7746	STAT1;UBC;DYNLL1
Human adenovirus 35 protease	3/14	0.00274168	0.0599686	0	0	10.3022	60.7746	STAT1;UBC;DYNLL1
Human adenovirus 52 protease	3/14	0.00274168	0.0597739	0	0	10.3022	60.7746	STAT1;UBC;DYNLL1
Human adenovirus 55 L3 23K 23.7 kDa protein	3/14	0.00274168	0.0595805	0	0	10.3022	60.7746	STAT1;UBC;DYNLL1
Human mastadenovirus B protease (gene: L3)	3/14	0.00274168	0.0593883	0	0	10.3022	60.7746	STAT1;UBC;DYNLL1
Human mastadenovirus F protease (gene: L3)	3/14	0.00274168	0.0591973	0	0	10.3022	60.7746	STAT1;UBC;DYNLL1
Human polyomavirus 6 small T antigen	3/14	0.00274168	0.0590076	0	0	10.3022	60.7746	HSPA8;HSPA5;STAT1
SARS coronavirus nsp13-pp1ab (ZD, NTPase/HEL; RNA (gene: orf1ab)	3/14	0.00274168	0.058819	0	0	10.3022	60.7746	UBB;UBC;ISG15
Cowpox virus CPXV069 protein (gene: CPXV069 CDS)	5/47	0.00284338	0.0608067	0	0	5.11457	29.9855	HSPA8;HSPA5;STAT1;UBC;SQSTM1
Human enterovirus C118 VP1	5/47	0.00284338	0.0606137	0	0	5.11457	29.9855	HSPA5;STAT1;FLNA;SQSTM1;ICAM1
Kyasanur Forest disease virus E	5/47	0.00284338	0.0604218	0	0	5.11457	29.9855	HSPA8;HSP90AB1;HSPA5;STAT1;RPL13
Monkeypox virus Zaire-96-I-16 chemokine binding protein (gene: J1L)	5/47	0.00284338	0.0602312	0	0	5.11457	29.9855	CCL7;STAT1;CCL5;CCL2;SQSTM1
Salivirus A full_polyprotein 1..2370	5/47	0.00284338	0.0600418	0	0	5.11457	29.9855	HSPA8;STAT1;UBC;SQSTM1;ICAM1
Variola virus hypothetical protein (gene: N1L)	5/47	0.00284338	0.0598536	0	0	5.11457	29.9855	DDX17;HSPA8;DDX5;STAT1;UBC
Human adenovirus 34 maturation protein IVa2 (gene: IVa2)	6/68	0.00288373	0.0605132	0	0	4.24208	24.8105	UBB;HSPA5;STAT1;UBC;ISG15;SQSTM1
Human adenovirus 35 IVa2	6/68	0.00288373	0.0603247	0	0	4.24208	24.8105	UBB;HSPA5;STAT1;UBC;ISG15;SQSTM1
STL polyomavirus middle T antigen	6/68	0.00288373	0.0601373	0	0	4.24208	24.8105	HSPA8;HSPA5;STAT1;UBC;PDIA6;HIST2H2AC
Human adenovirus 1 DBP	4/29	0.00290267	0.0603451	0	0	6.6313	38.7409	HSP90AB1;STAT1;UBC;HIST1H2AB
Human betaherpesvirus 5 interleukin-10 (gene: UL111A)	4/29	0.00290267	0.0601588	0	0	6.6313	38.7409	HSPA8;HSPA5;STAT1;UBC
Human betaherpesvirus 7 uracil-DNA glycosylase (gene: U81)	4/29	0.00290267	0.0599737	0	0	6.6313	38.7409	STAT1;RPS20;RPS2;SQSTM1
Human gammaherpesvirus 4 hypothetical protein (gene: BHRF1)	4/29	0.00290267	0.0597897	0	0	6.6313	38.7409	HSPA8;HSPA5;STAT1;SQSTM1
Human gammaherpesvirus 8 ORF16 (gene: ORF16)	4/29	0.00290267	0.0596069	0	0	6.6313	38.7409	HSPA8;HSPA5;STAT1;UBC
Human herpesvirus 4 type 2 BHRF1	4/29	0.00290267	0.0594252	0	0	6.6313	38.7409	HSPA8;HSPA5;STAT1;SQSTM1
Human rhinovirus A40 1D	4/29	0.00290267	0.0592445	0	0	6.6313	38.7409	STAT1;UBC;SQSTM1;ICAM1
Monkeypox virus secreted epidermal growth factor-like protein	4/29	0.00290267	0.059065	0	0	6.6313	38.7409	HSPA5;STAT1;UBC;SQSTM1
Monkeypox virus Zaire-96-I-16 epidermal growth factor-like protein (EGF-like protein) (gene: D3R)	4/29	0.00290267	0.0588866	0	0	6.6313	38.7409	HSPA5;STAT1;UBC;SQSTM1
Yellow fever virus core protein C	4/29	0.00290267	0.0587092	0	0	6.6313	38.7409	HSPA8;HSPA5;STAT1;UBC
Human alphaherpesvirus 2 tegument protein VP22 (gene: UL49)	8/116	0.00295077	0.0595028	0	0	3.31565	19.3159	ACTA2;UBB;STAT1;UBC;ISG15;RPS27A;RPS13;PPID
Monkeypox virus bifunctional hemagglutinin/type-I membrane glycoprotein	17/384	0.00299018	0.0601168	0	0	2.12841	12.3712	CD274;HSP90AB1;VWF;STAT1;ISG15;ICAM1;VEGFA;PTPRB;UBB;CCL7;CCL5;UBC;FLNA;RPL13;COL6A3;RPS27A;SQSTM1
Human enterovirus Ningbo3-02 full_polyprotein 1..2214	7/92	0.00307859	0.0617096	0	0	3.65803	21.1554	STAT1;UBC;HP;FLNA;SQSTM1;CFB;ICAM1
West Nile virus lineage 1 excised_polyprotein 1..787 (gene: flavivirus polyprotein)	7/92	0.00307859	0.061526	0	0	3.65803	21.1554	NFKBIA;HSPA8;HSP90AB1;STAT1;UBC;PSME1;SQSTM1
Kyasanur Forest disease virus NS3	6/69	0.00310413	0.0618524	0	0	4.1806	24.1431	STAT1;APLP2;UBC;COL6A3;RPS2;SQSTM1
Human enterovirus C104 VP1	5/48	0.00312077	0.0619999	0	0	5.00801	28.8946	HSPA5;STAT1;UBC;FLNA;ICAM1
Yaba monkey tumor virus 84R	5/48	0.00312077	0.061817	0	0	5.00801	28.8946	HSPA8;DDX5;HSPA5;STAT1;UBC
Lake Victoria marburgvirus - Leiden glycoprotein (gene: GP)	9/144	0.00322495	0.0636928	0	0	3.00481	17.2381	HSPA8;TPM4;HSPA5;TPM3;STAT1;UBC;RPL35;RPL23A;SQSTM1
Human immunodeficiency virus envelope glycoprotein (gene: env)	13/260	0.00326249	0.0642451	0	0	2.40385	13.7627	HSPA5;STAT1;TPM3;ISG15;HIST2H2AC;ACTA2;TUBB2A;UBB;UBC;FLNA;RPL13;SQSTM1;HIST1H2AB
Dengue virus 2 capsid protein C (gene: flavivirus polyprotein)	4/30	0.00329499	0.0646954	0	0	6.41026	36.6369	HSPA8;HSPA5;STAT1;UBC
Human adenovirus 52 pIIIa (gene: pIIIa)	4/30	0.00329499	0.0645068	0	0	6.41026	36.6369	HSPA8;HSPA5;STAT1;UBC
Human immunodeficiency virus 2 vpx protein	4/30	0.00329499	0.0643193	0	0	6.41026	36.6369	HSPA8;HSPA5;STAT1;RPL23A
Human papillomavirus 135 replication protein (gene: E1)	4/30	0.00329499	0.0641328	0	0	6.41026	36.6369	HSPA5;STAT1;UBC;SQSTM1
Sudan ebolavirus RNA-dependent RNA polymerase (gene: L)	4/30	0.00329499	0.0639475	0	0	6.41026	36.6369	HSPA8;HSPA5;STAT1;SQSTM1
Hepatitis C virus subtype 4v full_polyprotein 1..3005	6/70	0.00333687	0.0645738	0	0	4.12088	23.5002	HSPA8;HSPA5;STAT1;UBC;HIST2H2AC;HIST1H2AB
STL polyomavirus small T antigen	6/70	0.00333687	0.0643883	0	0	4.12088	23.5002	HSPA8;HSPA5;STAT1;UBC;PDIA6;HIST2H2AC
Echovirus 9 strain Hill polyprotein region 1	3/15	0.00337462	0.0649299	0	0	9.61538	54.7257	STAT1;UBC;SQSTM1
Echovirus E17 VP4	3/15	0.00337462	0.0647444	0	0	9.61538	54.7257	STAT1;UBC;SQSTM1
Echovirus E21 VP4	3/15	0.00337462	0.0645599	0	0	9.61538	54.7257	STAT1;UBC;SQSTM1
Echovirus E27 VP4	3/15	0.00337462	0.0643765	0	0	9.61538	54.7257	STAT1;UBC;SQSTM1
Echovirus E31 VP4	3/15	0.00337462	0.0641942	0	0	9.61538	54.7257	STAT1;UBC;SQSTM1
Ectromelia virus ERPV intracellular TLR and IL-1 signaling inhibitor	3/15	0.00337462	0.0640128	0	0	9.61538	54.7257	HSPA8;HSPA5;STAT1
Enterovirus B111 VP4	3/15	0.00337462	0.0638325	0	0	9.61538	54.7257	STAT1;UBC;SQSTM1
Enterovirus H capsid protein VP4	3/15	0.00337462	0.0636532	0	0	9.61538	54.7257	STAT1;UBC;SQSTM1
Human adenovirus 41 protease	3/15	0.00337462	0.0634749	0	0	9.61538	54.7257	STAT1;UBC;DYNLL1
Langat virus nonstructural protein NS5	3/15	0.00337462	0.0632976	0	0	9.61538	54.7257	HSPA8;HSPA5;STAT1
Merkel cell polyomavirus small T antigen	3/15	0.00337462	0.0631213	0	0	9.61538	54.7257	HSPA8;STAT1;UBC
Middle East respiratory syndrome-related coronavirus nsp12 protein (gene: orf1ab)	3/15	0.00337462	0.0629459	0	0	9.61538	54.7257	UBB;ISG15;UBA52
Titi monkey adenovirus ECC-2011 protease	3/15	0.00337462	0.0627716	0	0	9.61538	54.7257	STAT1;UBC;DYNLL1
Enterovirus H capsid protein VP2	5/49	0.00341714	0.063387	0	0	4.90581	27.8598	STAT1;FLNA;CFB;ICAM1;TAPBP
Hepatitis C virus subtype 3i full_polyprotein 1..3021	5/49	0.00341714	0.0632124	0	0	4.90581	27.8598	HSPA8;HSP90AB1;HSPA5;STAT1;PABPC1
Human enterovirus C117 VP1	5/49	0.00341714	0.0630387	0	0	4.90581	27.8598	HSPA5;STAT1;UBC;FLNA;ICAM1
Human polyomavirus 10 small t antigen	5/49	0.00341714	0.062866	0	0	4.90581	27.8598	HSPA8;HSPA5;STAT1;UBC;SQSTM1
Human enterovirus Hangzhou13-02 full_polyprotein 1..2214	7/94	0.00347255	0.0637109	0	0	3.5802	20.2742	STAT1;UBC;HP;FLNA;SQSTM1;CFB;ICAM1
Cosavirus JMY-2014 full_polyprotein 1..2119	6/71	0.00358236	0.0655465	0	0	4.06284	22.8808	STAT1;FLNA;SQSTM1;CFB;ICAM1;TAPBP
Louping ill virus nonstructural protein NS3	6/71	0.00358236	0.0653684	0	0	4.06284	22.8808	STAT1;APLP2;UBC;COL6A3;RPS2;SQSTM1
West Nile virus SA93/01 envelope protein	6/71	0.00358236	0.0651912	0	0	4.06284	22.8808	HSPA8;HSP90AB1;STAT1;UBC;PSME1;SQSTM1
West Nile virus SPU116/89 envelope protein	6/71	0.00358236	0.065015	0	0	4.06284	22.8808	HSPA8;HSP90AB1;STAT1;UBC;PSME1;SQSTM1
Human adenovirus 18 CR1-beta protein (gene: E3)	23/598	0.00366755	0.0663816	0	0	1.84911	10.3703	CD274;VWF;HSPA5;STAT1;ISG15;DYNLL1;RHOC;LILRB3;PTPRF;ICAM1;VEGFA;C3;PTPRB;CCL7;UBB;UBC;FLNA;CCL2;COL6A3;IGFBP7;RPS27A;MFGE8;SQSTM1
Ectromelia virus ERPV chemokine binding protein	4/31	0.00372189	0.0671842	0	0	6.20347	34.6993	CCL7;STAT1;CCL2;SQSTM1
Human rhinovirus A38 1D	4/31	0.00372189	0.0670041	0	0	6.20347	34.6993	HSPA5;STAT1;UBC;ICAM1
Vaccinia virus Ankara vaccinia virus growth factor (VGF)	4/31	0.00372189	0.0668249	0	0	6.20347	34.6993	HSPA5;STAT1;UBC;SQSTM1
Cowpox virus CPXV128 protein (gene: CPXV128 CDS)	5/50	0.00373321	0.0668493	0	0	4.80769	26.8773	HSPA8;DDX5;STAT1;UBC;PABPC1
Human betaherpesvirus 6B G-protein coupled receptor (gene: U12)	6/72	0.00384101	0.0685968	0	0	4.00641	22.2837	HSPA8;HSPA5;STAT1;UBC;ISG15;SQSTM1
Macacine alphaherpesvirus 1 tegument protein VP22 (gene: UL49)	6/72	0.00384101	0.0684148	0	0	4.00641	22.2837	HSPA8;UBB;STAT1;UBC;ISG15;RPS27A
Human enteric coronavirus 4408 full_polyprotein 1..7094	5/51	0.00406968	0.0722961	0	0	4.71342	25.9436	HSPA8;HSPA5;STAT1;UBC;SQSTM1
Norovirus Hu/Norwalk/10074/2009/VNM capsid protein VP1 (gene: VP1)	5/51	0.00406968	0.0721053	0	0	4.71342	25.9436	LGALS1;HSPA5;STAT1;UBC;SQSTM1
Norovirus Hu/Norwalk/20047/2009/VNM capsid protein VP1 (gene: VP1)	5/51	0.00406968	0.0719156	0	0	4.71342	25.9436	LGALS1;HSPA5;STAT1;UBC;SQSTM1
Variola virus chemokine binding protein (gene: G5R)	5/51	0.00406968	0.0717268	0	0	4.71342	25.9436	CXCL9;CCL7;STAT1;CCL5;CCL2
Echovirus E3 VP4	3/16	0.00408984	0.0718933	0	0	9.01442	49.5726	STAT1;UBC;SQSTM1
Enterovirus B97 VP4	3/16	0.00408984	0.0717056	0	0	9.01442	49.5726	STAT1;UBC;SQSTM1
Human enterovirus 79 1A (VP4)	3/16	0.00408984	0.0715189	0	0	9.01442	49.5726	STAT1;UBC;SQSTM1
Human enterovirus C104 VP4	3/16	0.00408984	0.0713331	0	0	9.01442	49.5726	STAT1;UBC;SQSTM1
Human enterovirus C117 VP4	3/16	0.00408984	0.0711483	0	0	9.01442	49.5726	STAT1;UBC;SQSTM1
Human rhinovirus QCE VP4	3/16	0.00408984	0.0709645	0	0	9.01442	49.5726	STAT1;UBC;SQSTM1
Middle East respiratory syndrome-related coronavirus nsp5 protein (gene: orf1ab)	3/16	0.00408984	0.0707816	0	0	9.01442	49.5726	UBB;STAT1;ISG15
Human papillomavirus type 119 transforming protein E7 (gene: E7)	4/32	0.00418479	0.0722388	0	0	6.00962	32.9104	HSPA5;STAT1;UBC;SQSTM1
Human rhinovirus A68 1D	4/32	0.00418479	0.0720536	0	0	6.00962	32.9104	HSPA5;STAT1;UBC;ICAM1
Sin Nombre virus viral RNA polymerase (L protein)	4/32	0.00418479	0.0718693	0	0	6.00962	32.9104	HSPA8;HSPA5;STAT1;UBC
Vaccinia virus Ankara 24.6k putative hydrolase.	4/32	0.00418479	0.0716859	0	0	6.00962	32.9104	HSPA5;STAT1;UBC;SQSTM1
Enterovirus B106 full_polyprotein 1..2192	8/123	0.00422212	0.0721414	0	0	3.12695	17.0964	C3;HSPA5;STAT1;UBC;DYNLL1;SQSTM1;CFB;ICAM1
Rosavirus A2 full_polyprotein 1..2468	6/74	0.00439949	0.0749811	0	0	3.89813	21.1523	EEF1A1;HSPA5;STAT1;UBC;SQSTM1;ICAM1
Enterovirus C109 VP1	5/52	0.00442727	0.0752636	0	0	4.62278	25.0553	HSPA5;STAT1;UBC;FLNA;ICAM1
Influenza A virus (A/Northern Territory/60/1968(H3N2)) HA2 (gene: HA)	5/52	0.00442727	0.0750735	0	0	4.62278	25.0553	CD274;TPM4;STAT1;UBC;SQSTM1
Merkel cell polyomavirus large T antigen	5/52	0.00442727	0.0748844	0	0	4.62278	25.0553	HSPA8;HSPA5;STAT1;UBC;RPS20
Norovirus Hu/GII.4/NIHIC11.3/2013/USA capsid protein VP1 (gene: VP1)	5/52	0.00442727	0.0746963	0	0	4.62278	25.0553	HSPA5;STAT1;UBC;FLNA;SQSTM1
Norovirus Hu/Norwalk/10247/2009/VNM capsid protein VP1 (gene: VP1)	5/52	0.00442727	0.0745091	0	0	4.62278	25.0553	LGALS1;HSPA5;STAT1;UBC;SQSTM1
Variola virus serine protease inhibitor-like protein (gene: C2L)	5/52	0.00442727	0.0743228	0	0	4.62278	25.0553	HSPA8;HSP90AB1;HSPA5;STAT1;UBC
Molluscum contagiosum virus subtype 1 MC080R (gene: MC080R)	18/434	0.00452925	0.0758452	0	0	1.99397	10.7619	CD274;HSPA8;DAXX;HSP90AB1;HSPA5;STAT1;RPS8;HIST2H2AC;TAPBP;RPS4X;UBC;FLNA;MYH9;RPS2;PABPC1;SQSTM1;RPL19;HIST1H2AB
Human mastadenovirus F membrane glycoprotein E3 CR1-beta (gene: E3A)	15/335	0.00463082	0.0773531	0	0	2.1527	11.5708	CD274;VWF;STAT1;ISG15;VEGFA;PTPRB;UBB;CCL7;UBC;COL6A3;CCL2;IGFBP7;MFGE8;RPS27A;SQSTM1
Echovirus E5 full_polyprotein 1..2196	8/125	0.00465319	0.0775339	0	0	3.07692	16.5237	STAT1;UBC;HP;FLNA;SQSTM1;CFB;ICAM1;TAPBP
Human adenovirus 67 E4 ORF1	4/33	0.00468504	0.0778714	0	0	5.82751	31.2551	HSP90AB1;STAT1;UBC;SQSTM1
Human papillomavirus E7 (gene: E7)	4/33	0.00468504	0.0776791	0	0	5.82751	31.2551	HSPA5;GSTP1;UBC;SQSTM1
Human papillomavirus 138 transforming protein (gene: E7)	4/33	0.00468504	0.0774878	0	0	5.82751	31.2551	STAT1;UBC;RPS20;SQSTM1
Human papillomavirus type 49 E7 protein (gene: E7)	4/33	0.00468504	0.0772974	0	0	5.82751	31.2551	STAT1;UBC;HP;SQSTM1
Human rhinovirus A94 1D	4/33	0.00468504	0.0771079	0	0	5.82751	31.2551	HSPA5;STAT1;UBC;ICAM1
Murray Valley encephalitis virus NS3	4/33	0.00468504	0.0769194	0	0	5.82751	31.2551	STAT1;APLP2;UBC;COL6A3
Reston ebolavirus - Reston VP35 (gene: VP35)	4/33	0.00468504	0.0767318	0	0	5.82751	31.2551	STAT1;UBC;ISG15;SQSTM1
Rhinovirus A98 1D	4/33	0.00468504	0.0765451	0	0	5.82751	31.2551	HSPA5;STAT1;UBC;ICAM1
Human enteric coronavirus strain 4408 full_polyprotein 1..7094	5/53	0.00480668	0.0783418	0	0	4.53556	24.2097	HSPA8;HSPA5;STAT1;UBC;SQSTM1
Human papillomavirus type 56 envelope protein (gene: E7)	5/53	0.00480668	0.0781521	0	0	4.53556	24.2097	STAT1;GSTP1;UBC;RPS20;SQSTM1
Norovirus Hu/GII.4/CHDC4108/1987/US VP1	5/53	0.00480668	0.0779634	0	0	4.53556	24.2097	LGALS1;HSPA5;STAT1;UBC;SQSTM1
Norovirus Hu/Norwalk/10051/2009/VNM capsid protein VP1 (gene: VP1)	5/53	0.00480668	0.0777755	0	0	4.53556	24.2097	LGALS1;HSPA5;STAT1;UBC;SQSTM1
Norovirus Hu/Norwalk/10116/2009/VNM capsid protein VP1 (gene: VP1)	5/53	0.00480668	0.0775885	0	0	4.53556	24.2097	LGALS1;HSPA5;STAT1;UBC;SQSTM1
Norovirus Hu/Norwalk/10183/2009/VNM capsid protein VP1 (gene: VP1)	5/53	0.00480668	0.0774025	0	0	4.53556	24.2097	LGALS1;HSPA5;STAT1;UBC;SQSTM1
Norovirus Hu/Norwalk/10236/2009/VNM capsid protein VP1 (gene: VP1)	5/53	0.00480668	0.0772173	0	0	4.53556	24.2097	LGALS1;HSPA5;STAT1;UBC;SQSTM1
Monkeypox virus double-stranded RNA binding protein	7/100	0.00488682	0.0783175	0	0	3.36538	17.9079	HSPA8;HSP90AB1;HSPA5;STAT1;UBC;RPS3;SQSTM1
Monkeypox virus Zaire-96-I-16 double-strand RNA-binding protein (gene: F3L)	7/100	0.00488682	0.078131	0	0	3.36538	17.9079	HSPA8;HSP90AB1;HSPA5;STAT1;UBC;RPS3;SQSTM1
Echovirus 9 strain Barty VP4	3/17	0.00489034	0.0780015	0	0	8.48416	45.1399	STAT1;UBC;SQSTM1
Echovirus E14 VP4	3/17	0.00489034	0.0778167	0	0	8.48416	45.1399	STAT1;UBC;SQSTM1
Echovirus E20 VP4	3/17	0.00489034	0.0776327	0	0	8.48416	45.1399	STAT1;UBC;SQSTM1
Echovirus E29 VP4	3/17	0.00489034	0.0774496	0	0	8.48416	45.1399	STAT1;UBC;SQSTM1
Human betaherpesvirus 6 U31, large tegument protein (gene: U31)	6/76	0.00501566	0.0792475	0	0	3.79555	20.0981	UBB;UBC;ISG15;FAU;RPS27A;UBA52
Human betaherpesvirus 6A large tegument protein (gene: U31)	6/76	0.00501566	0.0790614	0	0	3.79555	20.0981	UBB;UBC;ISG15;FAU;RPS27A;UBA52
Rio Bravo virus envelope protein	6/76	0.00501566	0.0788763	0	0	3.79555	20.0981	HSP90AB1;STAT1;UBC;FLNA;SQSTM1;TAPBP
Cercopithecine betaherpesvirus 5 chemokine vCXCL2 (gene: UL147)	8/127	0.00511726	0.0802859	0	0	3.02847	15.9756	CXCL9;HSPA5;CCL7;STAT1;CCL5;UBC;CCL2;SQSTM1
Enterovirus B97 VP2	5/54	0.0052086	0.0815285	0	0	4.45157	23.4039	HSPA5;STAT1;CFB;ICAM1;TAPBP
Human calicivirus Hu/NLV/GII/MD145-12/1987/US capsid protein	5/54	0.0052086	0.0813389	0	0	4.45157	23.4039	LGALS1;STAT1;UBC;FLNA;SQSTM1
Norovirus GII/Hu/TW/2012/GII.Pe_GII.4_Sydney2012/Taipei/108 VP1 (gene: VP1)	5/54	0.0052086	0.0811502	0	0	4.45157	23.4039	LGALS1;STAT1;UBC;FLNA;SQSTM1
Norovirus GII/Hu/TW/2012/GII.Pe_GII.4_Sydney2012/Taipei/109 VP1 (gene: VP1)	5/54	0.0052086	0.0809624	0	0	4.45157	23.4039	LGALS1;STAT1;UBC;FLNA;SQSTM1
Norovirus Hu/GII-4/CGMH23/2010/TW major viral capsid protein (gene: VP1)	5/54	0.0052086	0.0807754	0	0	4.45157	23.4039	LGALS1;STAT1;UBC;FLNA;SQSTM1
Norovirus Hu/GII-4/CGMH26/2010/TW major viral capsid protein (gene: VP1)	5/54	0.0052086	0.0805893	0	0	4.45157	23.4039	LGALS1;STAT1;UBC;FLNA;SQSTM1
Norovirus Hu/GII.4/CHDC3967/1988/US VP1	5/54	0.0052086	0.080404	0	0	4.45157	23.4039	LGALS1;STAT1;UBC;FLNA;SQSTM1
Norovirus Hu/GII.4/GZ2010-L87/Guangzhou/CHN/2011 major viral capsid protein (gene: VP1)	5/54	0.0052086	0.0802196	0	0	4.45157	23.4039	LGALS1;STAT1;UBC;FLNA;SQSTM1
Norovirus Hu/Norwalk/10368/2010/VNM capsid protein VP1 (gene: VP1)	5/54	0.0052086	0.080036	0	0	4.45157	23.4039	LGALS1;STAT1;UBC;FLNA;SQSTM1
Human papillomavirus type 67 E7	4/34	0.00522395	0.0800887	0	0	5.65611	29.72	STAT1;GSTP1;UBC;SQSTM1
Human rhinovirus A19 1D	4/34	0.00522395	0.0799063	0	0	5.65611	29.72	HSPA5;STAT1;UBC;ICAM1
Human rhinovirus A61 1D	4/34	0.00522395	0.0797247	0	0	5.65611	29.72	STAT1;UBC;SQSTM1;ICAM1
Human rhinovirus A82 1D	4/34	0.00522395	0.0795439	0	0	5.65611	29.72	HSPA5;STAT1;UBC;ICAM1
Human rhinovirus A88 1D (VP1)	4/34	0.00522395	0.0793639	0	0	5.65611	29.72	STAT1;UBC;SQSTM1;ICAM1
Tula virus RNA polymerase (L protein)	4/34	0.00522395	0.0791848	0	0	5.65611	29.72	HSPA8;HSPA5;STAT1;UBC
Vaccinia virus DNA-dependent RNA polymerase subunit rpo147 (gene: J6R)	4/34	0.00522395	0.0790064	0	0	5.65611	29.72	HSPA8;STAT1;UBC;SQSTM1
Vaccinia virus Ankara RNA polymerase subunit rpo147	4/34	0.00522395	0.0788289	0	0	5.65611	29.72	HSPA8;STAT1;UBC;SQSTM1
Variola virus epidermal growth factor-like protein (EGF-like protein) (gene: D1L)	4/34	0.00522395	0.0786521	0	0	5.65611	29.72	HSPA5;STAT1;UBC;SQSTM1
Yaba monkey tumor virus anti-apoptotic membrane protein	4/34	0.00522395	0.0784762	0	0	5.65611	29.72	HSPA5;TPM4;STAT1;UBC
Cercopithecine betaherpesvirus 5 helicase-primase helicase subunit (gene: UL105)	6/77	0.00534644	0.080137	0	0	3.74625	19.5979	TPM4;STAT1;UBC;CTNNA1;HIST2H2AC;HIST1H2AB
Human betaherpesvirus 6B large tegument protein (gene: U31)	6/77	0.00534644	0.0799585	0	0	3.74625	19.5979	UBB;UBC;ISG15;FAU;RPS27A;UBA52
Yaba monkey tumor virus double-strand RNA-binding protein	6/77	0.00534644	0.0797808	0	0	3.74625	19.5979	HSPA8;HSP90AB1;HSPA5;STAT1;UBC;SQSTM1
Adult diarrheal rotavirus strain J19 NSP1	7/102	0.00544308	0.0810427	0	0	3.2994	17.2011	HSPA8;HSP90AB1;HSPA5;STAT1;UBC;APOE;SQSTM1
Human rhinovirus B17 full_polyprotein 1..2186	7/102	0.00544308	0.0808634	0	0	3.2994	17.2011	C3;HSPA5;STAT1;UBC;DYNLL1;SQSTM1;ICAM1
Papiine alphaherpesvirus 2 tegument protein VP22 (gene: UL49)	7/102	0.00544308	0.0806849	0	0	3.2994	17.2011	HSPA8;UBB;STAT1;UBC;ISG15;RPS27A;SQSTM1
Yaba-like disease virus 141R protein (gene: 141R)	9/156	0.00544847	0.080587	0	0	2.77367	14.4575	UBB;VWF;STAT1;UBC;RPL13;ISG15;SQSTM1;ICAM1;VEGFA
Yaba-like disease virus 123R protein (gene: 123R)	9/156	0.00544847	0.0804099	0	0	2.77367	14.4575	THBD;CXCL9;CD93;HSPA5;VWF;STAT1;SFTPD;PABPC1;SFTPA1
Human adenovirus 7 IVa2	5/55	0.00563373	0.0829616	0	0	4.37063	22.6354	UBB;HSPA5;STAT1;UBC;SQSTM1
Norovirus Hu/GII-4/CGMH02/2006/TW major viral capsid protein (gene: VP1)	5/55	0.00563373	0.0827801	0	0	4.37063	22.6354	LGALS1;HSPA5;STAT1;UBC;SQSTM1
Norovirus Hu/GII-4/CGMH03/2006/TW major viral capsid protein (gene: VP1)	5/55	0.00563373	0.0825993	0	0	4.37063	22.6354	LGALS1;HSPA5;STAT1;UBC;SQSTM1
Norovirus Hu/GII-4/CGMH04/2006/TW major viral capsid protein (gene: VP1)	5/55	0.00563373	0.0824194	0	0	4.37063	22.6354	LGALS1;HSPA5;STAT1;UBC;SQSTM1
Norovirus Hu/GII-4/CGMH06/2006/TW major viral capsid protein	5/55	0.00563373	0.0822402	0	0	4.37063	22.6354	LGALS1;HSPA5;STAT1;UBC;SQSTM1
Norovirus Hu/GII-4/CGMH07/2006/TW major viral capsid protein (gene: VP1)	5/55	0.00563373	0.0820618	0	0	4.37063	22.6354	LGALS1;HSPA5;STAT1;UBC;SQSTM1
Norovirus Hu/GII-4/CGMH09/2006/TW major viral capsid protein (gene: VP1)	5/55	0.00563373	0.0818842	0	0	4.37063	22.6354	LGALS1;HSPA5;STAT1;UBC;SQSTM1
Norovirus Hu/GII-4/CGMH12/2007/TW major viral capsid protein (gene: VP1)	5/55	0.00563373	0.0817073	0	0	4.37063	22.6354	LGALS1;HSPA5;STAT1;UBC;SQSTM1
Norovirus Hu/GII-4/CGMH17/2007/TW major viral capsid protein (gene: VP1)	5/55	0.00563373	0.0815312	0	0	4.37063	22.6354	LGALS1;HSPA5;STAT1;UBC;SQSTM1
Norovirus Hu/GII-4/CGMH21/2010/TW major viral capsid protein (gene: VP1)	5/55	0.00563373	0.0813559	0	0	4.37063	22.6354	LGALS1;STAT1;UBC;FLNA;SQSTM1
Norovirus Hu/GII-4/CGMH24/2010/TW major viral capsid protein (gene: VP1)	5/55	0.00563373	0.0811813	0	0	4.37063	22.6354	LGALS1;STAT1;UBC;FLNA;SQSTM1
Norovirus Hu/GII-4/CGMH25/2010/TW major viral capsid protein (gene: VP1)	5/55	0.00563373	0.0810075	0	0	4.37063	22.6354	LGALS1;STAT1;UBC;FLNA;SQSTM1
Norovirus Hu/GII-4/CGMH27/2010/TW major viral capsid protein (gene: VP1)	5/55	0.00563373	0.0808344	0	0	4.37063	22.6354	LGALS1;STAT1;UBC;FLNA;SQSTM1
Norovirus Hu/GII.4/Caringbah/NSW409G/2011/AU VP1	5/55	0.00563373	0.080662	0	0	4.37063	22.6354	LGALS1;STAT1;UBC;FLNA;SQSTM1
Norovirus Hu/GII.4/HS292/2012/USA capsid protein VP1 (gene: VP1)	5/55	0.00563373	0.0804904	0	0	4.37063	22.6354	LGALS1;STAT1;UBC;FLNA;SQSTM1
Norovirus Hu/GII.4/NIHIC13/2011/USA capsid protein VP1 (gene: VP1)	5/55	0.00563373	0.0803195	0	0	4.37063	22.6354	LGALS1;STAT1;UBC;FLNA;SQSTM1
Norovirus Hu/GII.4/NIHIC18.1/2012/USA capsid protein VP1 (gene: VP1)	5/55	0.00563373	0.0801494	0	0	4.37063	22.6354	LGALS1;STAT1;UBC;FLNA;SQSTM1
Norovirus Hu/GII.4/NIHIC28.4/2012/USA capsid protein VP1 (gene: VP1)	5/55	0.00563373	0.0799799	0	0	4.37063	22.6354	LGALS1;HSPA5;STAT1;FLNA;SQSTM1
Norovirus Hu/GII.4/New Orleans/2010/USA VP1	5/55	0.00563373	0.0798112	0	0	4.37063	22.6354	LGALS1;STAT1;UBC;FLNA;SQSTM1
Norovirus Hu/GII.4/SGU-110421/KOR/2011 VP1	5/55	0.00563373	0.0796432	0	0	4.37063	22.6354	LGALS1;HSPA5;STAT1;UBC;SQSTM1
Norovirus Hu/GII.4/Sydney/NSW0514/2012/AU VP1	5/55	0.00563373	0.0794758	0	0	4.37063	22.6354	LGALS1;STAT1;UBC;FLNA;SQSTM1
Norovirus Hu/GII/20469/2010/VNM capsid protein VP1 (gene: VP1)	5/55	0.00563373	0.0793092	0	0	4.37063	22.6354	LGALS1;STAT1;UBC;FLNA;SQSTM1
Norovirus Hu/GII/BG1C0241-33/2011/BGD capsid protein VP1 (gene: VP1)	5/55	0.00563373	0.0791433	0	0	4.37063	22.6354	LGALS1;STAT1;UBC;FLNA;SQSTM1
Norovirus Hu/GII/Seoul1282/KOR/2010 major capsid protein	5/55	0.00563373	0.0789781	0	0	4.37063	22.6354	LGALS1;STAT1;UBC;FLNA;SQSTM1
Norovirus Hu/GII/Seoul1488/KOR/2011 major capsid protein	5/55	0.00563373	0.0788135	0	0	4.37063	22.6354	LGALS1;STAT1;UBC;FLNA;SQSTM1
Norovirus Hu/Norwalk/10325/2010/VNM capsid protein VP1 (gene: VP1)	5/55	0.00563373	0.0786497	0	0	4.37063	22.6354	LGALS1;STAT1;UBC;FLNA;SQSTM1
Norovirus Hu/Norwalk/10386/2010/VNM capsid protein VP1 (gene: VP1)	5/55	0.00563373	0.0784865	0	0	4.37063	22.6354	LGALS1;STAT1;UBC;FLNA;SQSTM1
Enterovirus A120 full_polyprotein 1..2191	6/78	0.00569292	0.0791469	0	0	3.69822	19.1144	C3;DAXX;STAT1;UBC;SQSTM1;ICAM1
Human TMEV-like cardiovirus capsid protein VP3	3/18	0.00577883	0.0801753	0	0	8.01282	41.2945	STAT1;FLNA;ICAM1
Human adenovirus 11a L3 hexon-associated protein VI	3/18	0.00577883	0.08001	0	0	8.01282	41.2945	HSPA8;HSPA5;STAT1
Human adenovirus 55 L3 pVI 26.6 kDa protein	3/18	0.00577883	0.0798453	0	0	8.01282	41.2945	HSPA8;HSPA5;STAT1
Human adenovirus D8 pVI (gene: L3)	3/18	0.00577883	0.0796814	0	0	8.01282	41.2945	HSPA8;HSPA5;STAT1
Human rhinovirus QCE VP3	3/18	0.00577883	0.0795181	0	0	8.01282	41.2945	STAT1;FLNA;ICAM1
Kyasanur Forest disease virus NS5	3/18	0.00577883	0.0793555	0	0	8.01282	41.2945	HSPA8;HSPA5;STAT1
Middle East respiratory syndrome-related coronavirus nsp9 protein (gene: orf1ab)	3/18	0.00577883	0.0791935	0	0	8.01282	41.2945	UBB;STAT1;ISG15
Norovirus GIV VP1	3/18	0.00577883	0.0790323	0	0	8.01282	41.2945	HSPA5;STAT1;FLNA
Norovirus Hu/GIV.1/LakeMacquarie/NSW268O/2010/AU VP1	3/18	0.00577883	0.0788716	0	0	8.01282	41.2945	HSPA5;STAT1;FLNA
Powassan virus RNA-dependent RNA polymerase	3/18	0.00577883	0.0787116	0	0	8.01282	41.2945	HSPA8;HSPA5;STAT1
Yaba-like disease virus 139R protein (gene: 139R)	3/18	0.00577883	0.0785523	0	0	8.01282	41.2945	HSPA5;STAT1;UBC
Yaba-like disease virus 67R protein (gene: 67R)	3/18	0.00577883	0.0783936	0	0	8.01282	41.2945	HSPA8;HSPA5;STAT1
Cowpox virus CPXV070 protein (gene: CPXV070 CDS)	4/35	0.00580283	0.0785604	0	0	5.49451	28.2935	HSP90AB1;HSPA5;STAT1;SQSTM1
Dengue virus 3 membrane glycoprotein precursor M (gene: flavivirus polyprotein)	4/35	0.00580283	0.0784024	0	0	5.49451	28.2935	HSPA8;HSPA5;STAT1;HIST2H2AC
Horsepox virus HSPV115 (Nudix hydrolase)	4/35	0.00580283	0.0782449	0	0	5.49451	28.2935	STAT1;UBC;MYH9;SQSTM1
Human papillomavirus KC5 E7 (gene: E7)	4/35	0.00580283	0.0780881	0	0	5.49451	28.2935	STAT1;GSTP1;UBC;SQSTM1
Human rhinovirus A10 1D	4/35	0.00580283	0.077932	0	0	5.49451	28.2935	HSPA5;STAT1;UBC;ICAM1
Influenza A virus (A/New York/392/2004(H3N2)) matrix protein 1 (gene: M1)	4/35	0.00580283	0.0777764	0	0	5.49451	28.2935	HSPA8;HSPA5;STAT1;RPL13
Influenza B virus (B/Memphis/12/97) M1 protein	4/35	0.00580283	0.0776215	0	0	5.49451	28.2935	HSPA8;HSPA5;STAT1;UBC
Middle East respiratory syndrome-related coronavirus nsp15 protein (gene: orf1ab)	4/35	0.00580283	0.0774672	0	0	5.49451	28.2935	UBB;STAT1;ISG15;UBA52
Norovirus Hu/GII.2/HS255/2011/USA capsid protein VP1 (gene: VP1)	4/35	0.00580283	0.0773135	0	0	5.49451	28.2935	HSPA5;STAT1;UBC;FLNA
Norovirus Hu/GII.4/Woonona/NSW3309/2012/AU VP1	4/35	0.00580283	0.0771604	0	0	5.49451	28.2935	STAT1;UBC;FLNA;SQSTM1
Hepatitis C virus subtype 2k full_polyprotein 1..3033	6/79	0.0060555	0.080361	0	0	3.65141	18.647	DAXX;HSP90AB1;HSPA5;STAT1;HIST2H2AC;HIST1H2AB
Variola virus hypothetical protein (gene: A47R)	6/79	0.0060555	0.0802025	0	0	3.65141	18.647	ACTA2;HSPA8;HSP90AB1;STAT1;DYNLL1;SQSTM1
Human polyomavirus 7 large T antigen	5/56	0.00608276	0.080405	0	0	4.29258	21.902	HSPA8;HSPA5;STAT1;UBC;SQSTM1
Norovirus GII/Hu/JP/2012/GII.Pe_GII.4_Sydney2012/Fukuyama/1 VP1 (gene: VP1)	5/56	0.00608276	0.080247	0	0	4.29258	21.902	LGALS1;STAT1;UBC;FLNA;SQSTM1
Norovirus GII/Hu/JP/2012/GII.Pe_GII.4_Sydney2012/Fukuyama/2 VP1 (gene: VP1)	5/56	0.00608276	0.0800896	0	0	4.29258	21.902	LGALS1;STAT1;UBC;FLNA;SQSTM1
Norovirus GII/Hu/JP/2012/GII.Pe_GII.4_Sydney2012/Fukuyama/3 VP1 (gene: VP1)	5/56	0.00608276	0.0799329	0	0	4.29258	21.902	LGALS1;STAT1;UBC;FLNA;SQSTM1
Norovirus GII/Hu/JP/2012/GII.Pe_GII.4_Sydney2012/Fukuyama/5 VP1 (gene: VP1)	5/56	0.00608276	0.0797768	0	0	4.29258	21.902	LGALS1;STAT1;UBC;FLNA;SQSTM1
Norovirus Hu/GII-4/CGMH05/2006/TW major viral capsid protein (gene: VP1)	5/56	0.00608276	0.0796213	0	0	4.29258	21.902	LGALS1;HSPA5;STAT1;UBC;SQSTM1
Norovirus Hu/GII-4/CGMH08/2006/TW major viral capsid protein (gene: VP1)	5/56	0.00608276	0.0794664	0	0	4.29258	21.902	LGALS1;HSPA5;STAT1;UBC;SQSTM1
Norovirus Hu/GII-4/CGMH16/2007/TW major viral capsid protein (gene: VP1)	5/56	0.00608276	0.0793121	0	0	4.29258	21.902	LGALS1;HSPA5;STAT1;UBC;SQSTM1
Norovirus Hu/GII.4/Doonside/NSW536I/2011/AU VP1	5/56	0.00608276	0.0791584	0	0	4.29258	21.902	LGALS1;STAT1;UBC;FLNA;SQSTM1
Norovirus Hu/GII.4/GZ2010-L26/Guangzhou/CHN/2010 major viral capsid protein (gene: VP1)	5/56	0.00608276	0.0790053	0	0	4.29258	21.902	LGALS1;HSPA5;STAT1;UBC;SQSTM1
Norovirus Hu/GII.4/Hong Kong/CUHK3630/2012/CHN VP1	5/56	0.00608276	0.0788527	0	0	4.29258	21.902	LGALS1;STAT1;UBC;FLNA;SQSTM1
Norovirus Hu/GII.4/Jiangsu1/2011/CHN major capsid protein	5/56	0.00608276	0.0787008	0	0	4.29258	21.902	LGALS1;STAT1;UBC;FLNA;SQSTM1
Norovirus Hu/GII.4/NIHIC27.2/2012/USA capsid protein VP1 (gene: VP1)	5/56	0.00608276	0.0785495	0	0	4.29258	21.902	LGALS1;HSPA5;STAT1;UBC;SQSTM1
Norovirus Hu/GII/Shanghai/SH2/2008/CHN VP1	5/56	0.00608276	0.0783987	0	0	4.29258	21.902	LGALS1;HSPA5;STAT1;UBC;SQSTM1
Norovirus Hu/Norwalk/10285/2010/VNM capsid protein VP1 (gene: VP1)	5/56	0.00608276	0.0782485	0	0	4.29258	21.902	LGALS1;STAT1;UBC;FLNA;SQSTM1
Norovirus Hu/Norwalk/10313/2010/VNM capsid protein VP1 (gene: VP1)	5/56	0.00608276	0.0780989	0	0	4.29258	21.902	LGALS1;STAT1;UBC;FLNA;SQSTM1
Norovirus Hu/Norwalk/10378/2010/VNM capsid protein VP1 (gene: VP1)	5/56	0.00608276	0.0779498	0	0	4.29258	21.902	LGALS1;STAT1;UBC;FLNA;SQSTM1
Norovirus Hu/Shanghai/SH5/2009/CHN VP1	5/56	0.00608276	0.0778014	0	0	4.29258	21.902	LGALS1;HSPA5;STAT1;UBC;SQSTM1
Norovirus Hu/GII.6/CHDC4073/1984/USA RNA-directed RNA polymerase (gene: POL)	2/6	0.00612504	0.0781932	0	0	16.0256	81.6566	UBC;MYL9
Alphapapillomavirus 4 early protein E2 (gene: E2)	8/131	0.00615079	0.0783729	0	0	2.936	14.9477	EEF1G;HSPA5;STAT1;MYH9;RPS20;PABPC1;DYNLL1;SQSTM1
Human papillomavirus type 2 E2 protein (gene: E2)	8/131	0.00615079	0.0782245	0	0	2.936	14.9477	EEF1G;HSPA5;STAT1;MYH9;RPS20;PABPC1;DYNLL1;SQSTM1
Influenza A virus (A/California/04/2009(H1N1)) HA2 (gene: HA)	10/189	0.0063617	0.0807539	0	0	2.54375	12.8649	HSPA8;TUBB2A;TPM4;HSPA5;STAT1;UBC;PABPC1;GBP2;SQSTM1;GBP4
Influenza A virus (A/California/07/2009(H1N1)) HA2 (gene: HA)	10/189	0.0063617	0.0806015	0	0	2.54375	12.8649	HSPA8;TUBB2A;TPM4;HSPA5;STAT1;UBC;PABPC1;GBP2;SQSTM1;GBP4
Lake Victoria marburgvirus - Angola2005 glycoprotein (gene: GP)	7/105	0.0063647	0.0804877	0	0	3.20513	16.2083	HSPA8;TPM4;HSPA5;TPM3;STAT1;UBC;RPL23A
Cowpox virus CPXV021 protein or CPXV VGF protein (gene: VGF)	4/36	0.0064229	0.081071	0	0	5.34188	26.9652	HSPA5;STAT1;UBC;SQSTM1
Human alphaherpesvirus 3 ribonucleotide reductase subunit 2 (gene: ORF18)	4/36	0.0064229	0.0809189	0	0	5.34188	26.9652	HSPA5;STAT1;FTH1;UBC
Human coronavirus OC43 nsp4 (gene: orf1ab)	4/36	0.0064229	0.0807674	0	0	5.34188	26.9652	HSPA8;HSPA5;STAT1;UBC
Human herpesvirus 3 strain Dumas ribonucleotide reductase (small subunit)	4/36	0.0064229	0.0806164	0	0	5.34188	26.9652	HSPA5;STAT1;FTH1;UBC
Human rhinovirus A50 1D	4/36	0.0064229	0.080466	0	0	5.34188	26.9652	HSPA5;STAT1;UBC;ICAM1
Human rhinovirus A85 1D	4/36	0.0064229	0.0803162	0	0	5.34188	26.9652	STAT1;UBC;SQSTM1;ICAM1
Influenza B virus matrix protein 1 (gene: M1)	4/36	0.0064229	0.0801669	0	0	5.34188	26.9652	HSPA8;HSPA5;STAT1;UBC
Norovirus Hu/GII.4/CHDC4871/1977/US VP1	4/36	0.0064229	0.0800182	0	0	5.34188	26.9652	HSPA5;STAT1;UBC;SQSTM1
Norovirus Hu/GII.4/CHDC5191/1974/USA capsid protein VP1 (gene: VP1)	4/36	0.0064229	0.07987	0	0	5.34188	26.9652	HSPA5;STAT1;UBC;SQSTM1
Variola virus hypothetical protein (gene: F9R)	4/36	0.0064229	0.0797224	0	0	5.34188	26.9652	HSPA5;STAT1;UBC;SQSTM1
Zika virus envelope protein E (gene: flavivirus polyprotein)	4/36	0.0064229	0.0795753	0	0	5.34188	26.9652	HSPA8;HSP90AB1;HSPA5;STAT1
Vaccinia virus Ankara EEV membrane glycoprotein	8/132	0.0064323	0.0795449	0	0	2.91375	14.704	THBD;CD93;HSPA5;VWF;STAT1;SFTPD;PABPC1;SFTPA1
Cowpox virus CPXV087 protein (gene: CPXV087 CDS)	6/80	0.00643462	0.0794273	0	0	3.60577	18.1949	DDX17;HSPA8;DDX5;STAT1;UBC;PABPC1
Horsepox virus HSPV164 (Profilin)	6/80	0.00643462	0.0792816	0	0	3.60577	18.1949	ACTA2;HSPA8;HSP90AB1;STAT1;DYNLL1;SQSTM1
Monkeypox virus profilin-like protein	6/80	0.00643462	0.0791364	0	0	3.60577	18.1949	ACTA2;HSPA8;HSP90AB1;STAT1;DYNLL1;SQSTM1
Monkeypox virus Zaire-96-I-16 A42R (gene: A42R)	6/80	0.00643462	0.0789917	0	0	3.60577	18.1949	ACTA2;HSPA8;HSP90AB1;STAT1;DYNLL1;SQSTM1
Orf virus ORF071 NPH-PPH downregulator	6/80	0.00643462	0.0788476	0	0	3.60577	18.1949	HSPA5;STAT1;UBC;MYH9;ISG15;SQSTM1
Norovirus Hu/GII-4/CGMH14/2007/TW major viral capsid protein (gene: VP1)	5/57	0.00655636	0.080193	0	0	4.21727	21.2016	LGALS1;HSPA5;STAT1;UBC;SQSTM1
Norovirus Hu/GII-4/CGMH15/2007/TW major viral capsid protein	5/57	0.00655636	0.0800472	0	0	4.21727	21.2016	LGALS1;HSPA5;STAT1;UBC;SQSTM1
Norovirus Hu/GII.4/20199/2009/VNM capsid protein VP1 (gene: VP1)	5/57	0.00655636	0.0799019	0	0	4.21727	21.2016	LGALS1;STAT1;UBC;FLNA;SQSTM1
Norovirus Hu/GII.4/Hong Kong/CUHK6080/2012/CHN VP1	5/57	0.00655636	0.0797572	0	0	4.21727	21.2016	LGALS1;STAT1;UBC;FLNA;SQSTM1
Norovirus Hu/Norwalk/20123/2009/VNM capsid protein VP1 (gene: VP1)	5/57	0.00655636	0.079613	0	0	4.21727	21.2016	LGALS1;HSPA5;STAT1;UBC;SQSTM1
Vaccinia virus double-strand RNA-binding protein (gene: E3L)	5/57	0.00655636	0.0794693	0	0	4.21727	21.2016	STAT1;UBC;SQSTM1;HIST2H2AC;HIST1H2AB
Vaccinia virus chemokine binding protein (gene: C23L)	5/57	0.00655636	0.0793261	0	0	4.21727	21.2016	CXCL9;CCL7;STAT1;CCL5;CCL2
Vaccinia virus Ankara viral chemokine binding protein	5/57	0.00655636	0.0791834	0	0	4.21727	21.2016	CXCL9;CCL7;STAT1;CCL5;CCL2
Murray Valley encephalitis virus prodexcised_polyprotein 1..793	7/106	0.0066963	0.0807283	0	0	3.17489	15.8941	NFKBIA;HSPA8;HSP90AB1;HSPA5;STAT1;PSME1;RPL13
Vaccinia virus IL-beta-binding protein (gene: VACWR-B15R)	8/133	0.00672348	0.0809107	0	0	2.89184	14.4654	PTPRB;HSPA5;STAT1;UBC;FLNA;IGFBP7;SQSTM1;VEGFA
BK polyomavirus small t antigen	3/19	0.00675772	0.0811773	0	0	7.59109	37.9332	HSPA8;STAT1;UBC
Cyclovirus PK6197 replication-association protein (gene: rep)	3/19	0.00675772	0.0810323	0	0	7.59109	37.9332	STAT1;DYNLL1;SQSTM1
Echovirus E19 VP4	3/19	0.00675772	0.0808879	0	0	7.59109	37.9332	STAT1;UBC;SQSTM1
Echovirus E24 VP4	3/19	0.00675772	0.0807439	0	0	7.59109	37.9332	STAT1;UBC;SQSTM1
Echovirus E33 VP4	3/19	0.00675772	0.0806005	0	0	7.59109	37.9332	STAT1;UBC;SQSTM1
Echovirus E6 VP4	3/19	0.00675772	0.0804576	0	0	7.59109	37.9332	STAT1;UBC;SQSTM1
Enterovirus B 1A(VP4)	3/19	0.00675772	0.0803152	0	0	7.59109	37.9332	STAT1;UBC;SQSTM1
Human adenovirus 11+34 protein VI precursor (gene: L3)	3/19	0.00675772	0.0801733	0	0	7.59109	37.9332	HSPA8;HSPA5;STAT1
Human adenovirus 14 protein VI (gene: L3)	3/19	0.00675772	0.0800319	0	0	7.59109	37.9332	HSPA8;HSPA5;STAT1
Human adenovirus 16 protein VI precursor (gene: L3)	3/19	0.00675772	0.079891	0	0	7.59109	37.9332	HSPA8;HSPA5;STAT1
Human adenovirus 21a protein VI precursor (gene: L3)	3/19	0.00675772	0.0797506	0	0	7.59109	37.9332	HSPA8;HSPA5;STAT1
Human adenovirus 34 protein VI (gene: L3)	3/19	0.00675772	0.0796107	0	0	7.59109	37.9332	HSPA8;HSPA5;STAT1
Human adenovirus 35 pVI	3/19	0.00675772	0.0794713	0	0	7.59109	37.9332	HSPA8;HSPA5;STAT1
Human adenovirus 50 protein VI (gene: L3)	3/19	0.00675772	0.0793323	0	0	7.59109	37.9332	HSPA8;HSPA5;STAT1
Monkeypox virus Zaire-96-I-16 E9R (gene: E9R)	3/19	0.00675772	0.0791939	0	0	7.59109	37.9332	STAT1;UBC;SQSTM1
Norovirus Hu/GIV.1/CCDC GR1113-59/CHN/2011 major capsid protein	3/19	0.00675772	0.0790559	0	0	7.59109	37.9332	HSPA5;STAT1;FLNA
Titi monkey adenovirus ECC-2011 pVI	3/19	0.00675772	0.0789184	0	0	7.59109	37.9332	HSPA8;HSPA5;STAT1
Variola virus host-range protein (gene: D8L)	3/19	0.00675772	0.0787814	0	0	7.59109	37.9332	HSPA8;HSPA5;STAT1
Cowpox virus CPXV179 protein (gene: CPXV179 CDS)	6/81	0.00683069	0.079494	0	0	3.56125	17.7576	ACTA2;HSPA8;HSP90AB1;STAT1;DYNLL1;SQSTM1
Coxsackievirus A4 full_polyprotein 1..2201	6/81	0.00683069	0.0793565	0	0	3.56125	17.7576	DAXX;STAT1;UBC;SQSTM1;ICAM1;TAPBP
Vaccinia virus profilin-like protein (gene: A42R)	6/81	0.00683069	0.0792194	0	0	3.56125	17.7576	ACTA2;HSPA8;HSP90AB1;STAT1;DYNLL1;SQSTM1
Vaccinia virus Ankara Profilin-1-like	6/81	0.00683069	0.0790829	0	0	3.56125	17.7576	ACTA2;HSPA8;HSP90AB1;STAT1;DYNLL1;SQSTM1
Human alphaherpesvirus 1 DNA replication origin-binding helicase (gene: UL9)	5/58	0.00705521	0.0815417	0	0	4.14456	20.5321	HSPA8;DDX5;STAT1;UBC;DYNLL1
Norovirus Hu/GII-4/CGMH10/2006/TW major viral capsid protein (gene: VP1)	5/58	0.00705521	0.0814016	0	0	4.14456	20.5321	LGALS1;HSPA5;STAT1;UBC;SQSTM1
Norovirus Hu/GII-4/CGMH22/2010/TW major viral capsid protein (gene: VP1)	5/58	0.00705521	0.081262	0	0	4.14456	20.5321	LGALS1;HSPA5;STAT1;UBC;SQSTM1
Norovirus Hu/GII.4/Miranda/NSW850K/2011/AU VP1	5/58	0.00705521	0.0811229	0	0	4.14456	20.5321	LGALS1;HSPA5;STAT1;UBC;SQSTM1
Norovirus Hu/Norwalk/20033/2009/VNM capsid protein VP1 (gene: VP1)	5/58	0.00705521	0.0809842	0	0	4.14456	20.5321	LGALS1;STAT1;UBC;FLNA;SQSTM1
Yaba-like disease virus 39L protein (gene: 39L)	5/58	0.00705521	0.080846	0	0	4.14456	20.5321	HSPA8;HSPA5;STAT1;UBC;SQSTM1
Horsepox virus HSPV061 (RNA polymerase subunit; Provisional)	4/37	0.00708539	0.0810535	0	0	5.19751	25.7262	HSP90AB1;HSPA5;STAT1;SQSTM1
Human enterovirus C102 2c	4/37	0.00708539	0.0809156	0	0	5.19751	25.7262	NFKBIA;ATP5B;STAT1;UBC
Human papillomavirus 109 E7 protein (gene: E7)	4/37	0.00708539	0.0807783	0	0	5.19751	25.7262	STAT1;GSTP1;UBC;SQSTM1
Human stool-associated circular virus NG13 replication-association protein (gene: rep)	4/37	0.00708539	0.0806414	0	0	5.19751	25.7262	HSPA5;STAT1;UBC;SQSTM1
Influenza A virus (A/Puerto Rico/8/1934(H1N1)) matrix protein 1 (gene: M1)	4/37	0.00708539	0.0805049	0	0	5.19751	25.7262	HSPA8;HSPA5;STAT1;RPL13
Norovirus GII/Hu/HKG/2013/GII.4/CUHK-NS-141 VP1	4/37	0.00708539	0.0803689	0	0	5.19751	25.7262	STAT1;UBC;FLNA;SQSTM1
Norovirus Hu/GII.4/HS191/2004/USA VP1	4/37	0.00708539	0.0802334	0	0	5.19751	25.7262	HSPA5;STAT1;UBC;SQSTM1
Norovirus Hu/GII.4/HS66/2001/USA capsid protein VP1 (gene: VP1)	4/37	0.00708539	0.0800983	0	0	5.19751	25.7262	HSPA5;STAT1;UBC;SQSTM1
Norovirus Hu/GII.4/Jiangsu2/2012/CHN major capsid protein	4/37	0.00708539	0.0799637	0	0	5.19751	25.7262	STAT1;UBC;FLNA;SQSTM1
Zika virus capsid protein C (gene: flavivirus polyprotein)	4/37	0.00708539	0.0798295	0	0	5.19751	25.7262	HSPA8;HSPA5;STAT1;UBC
Human betacoronavirus 2c EMC/2012 ORF4a (gene: orf4a)	6/82	0.00724412	0.0814812	0	0	3.51782	17.3343	HSPA8;HSP90AB1;HSPA5;STAT1;UBC;SQSTM1
Louping ill virus envelope protein	6/82	0.00724412	0.081345	0	0	3.51782	17.3343	HSPA8;HSP90AB1;STAT1;UBC;RPL13;SQSTM1
Middle East respiratory syndrome-related coronavirus NS4A protein (gene: orf4a)	6/82	0.00724412	0.0812092	0	0	3.51782	17.3343	HSPA8;HSP90AB1;HSPA5;STAT1;UBC;SQSTM1
Molluscum contagiosum virus subtype 1 MC100R (gene: MC100L)	6/82	0.00724412	0.0810738	0	0	3.51782	17.3343	DDX17;DDX5;STAT1;UBC;PABPC1;SQSTM1
Human poliovirus 3 polyprotein	7/108	0.0073978	0.0826559	0	0	3.1161	15.2894	ATP5B;STAT1;UBC;FLNA;SQSTM1;CFB;ICAM1
Ectromelia virus ERPV helicase NPH-I	5/59	0.00757997	0.0845507	0	0	4.07432	19.8918	HSPA8;DDX5;STAT1;UBC;PABPC1
Hepatitis B virus capsid protein (gene: C)	5/59	0.00757997	0.0844105	0	0	4.07432	19.8918	HSPA8;HSPA5;STAT1;UBC;RPL35
Human coronavirus OC43 Orf1ab (gene: orf1ab)	5/59	0.00757997	0.0842707	0	0	4.07432	19.8918	HSPA8;HSPA5;STAT1;UBC;SQSTM1
Human papillomavirus 100 E7 protein (gene: E7)	5/59	0.00757997	0.0841314	0	0	4.07432	19.8918	STAT1;GSTP1;UBC;RPS20;SQSTM1
Norovirus Hu/GII-4/CGMH18/2008/TW major viral capsid protein (gene: VP1)	5/59	0.00757997	0.0839926	0	0	4.07432	19.8918	LGALS1;HSPA5;STAT1;UBC;SQSTM1
Norovirus Hu/GII-4/CGMH28/2010/TW major viral capsid protein (gene: VP1)	5/59	0.00757997	0.0838542	0	0	4.07432	19.8918	LGALS1;HSPA5;STAT1;UBC;SQSTM1
Cercopithecine alphaherpesvirus 2 envelope glycoprotein E (gene: US8)	4/38	0.00779145	0.086052	0	0	5.06073	24.5685	HSP90AB1;HSPA5;STAT1;TAPBP
Coxsackievirus A8 VP1 protein	4/38	0.00779145	0.0859107	0	0	5.06073	24.5685	STAT1;UBC;SQSTM1;ICAM1
Cyclovirus TN18 replication-association protein (gene: rep)	4/38	0.00779145	0.0857699	0	0	5.06073	24.5685	STAT1;UBC;DYNLL1;SQSTM1
Horsepox virus HSPV160 (CD47 immunoglobulin-like domain)	4/38	0.00779145	0.0856295	0	0	5.06073	24.5685	HSPA5;STAT1;UBC;CD47
Human coronavirus HKU1 nsp7 (gene: orf1ab)	4/38	0.00779145	0.0854896	0	0	5.06073	24.5685	HSPA8;HSPA5;STAT1;UBC
Human rhinovirus A100 1D	4/38	0.00779145	0.0853501	0	0	5.06073	24.5685	STAT1;UBC;SQSTM1;ICAM1
Norovirus GII/Hu/TW/2012/GII.Pe_GII.4_Sydney2012/Taipei/105 VP1 (gene: VP1)	4/38	0.00779145	0.0852111	0	0	5.06073	24.5685	STAT1;UBC;FLNA;SQSTM1
Norovirus GII/Hu/TW/2012/GII.Pe_GII.4_Sydney2012/Taipei/106 VP1 (gene: VP1)	4/38	0.00779145	0.0850725	0	0	5.06073	24.5685	STAT1;UBC;FLNA;SQSTM1
Norovirus Hu/GII.4/Jingzhou/2013403/CHN major capsid protein VP1	4/38	0.00779145	0.0849344	0	0	5.06073	24.5685	STAT1;UBC;FLNA;SQSTM1
Norovirus Hu/GII.4/MD-2004/2004/US VP1	4/38	0.00779145	0.0847968	0	0	5.06073	24.5685	STAT1;UBC;FLNA;SQSTM1
Norovirus Hu/GII/BG1C0405/2012/BGD capsid protein VP1 (gene: VP1)	4/38	0.00779145	0.0846596	0	0	5.06073	24.5685	STAT1;UBC;FLNA;SQSTM1
Papiine alphaherpesvirus 2 envelope glycoprotein E (gene: US8)	4/38	0.00779145	0.0845228	0	0	5.06073	24.5685	HSP90AB1;HSPA5;STAT1;TAPBP
Yaba-like disease virus 12L protein (gene: 12L)	4/38	0.00779145	0.0843865	0	0	5.06073	24.5685	HSPA8;HSPA5;STAT1;UBC
Cowpox virus CPXV091 protein (gene: CPXV091 CDS)	3/20	0.00782916	0.0846583	0	0	7.21154	34.9752	STAT1;UBC;SQSTM1
Coxsackievirus A1 VP4	3/20	0.00782916	0.0845222	0	0	7.21154	34.9752	STAT1;UBC;SQSTM1
Coxsackievirus A8 VP3 protein	3/20	0.00782916	0.0843865	0	0	7.21154	34.9752	HSPA5;STAT1;ICAM1
Echovirus E16 VP4	3/20	0.00782916	0.0842513	0	0	7.21154	34.9752	STAT1;UBC;SQSTM1
Echovirus E2 VP4	3/20	0.00782916	0.0841165	0	0	7.21154	34.9752	STAT1;UBC;SQSTM1
Ectromelia virus ERPV virokine/NFKb inhibitor	3/20	0.00782916	0.0839821	0	0	7.21154	34.9752	HSPA8;STAT1;UBC
Ectromelia virus ERPV glutaredoxin 2	3/20	0.00782916	0.0838482	0	0	7.21154	34.9752	STAT1;UBC;SQSTM1
Human adenovirus 21 protein VI precursor (gene: L3)	3/20	0.00782916	0.0837147	0	0	7.21154	34.9752	HSPA8;HSPA5;STAT1
Human adenovirus 3+7 protein VI precursor (gene: L3)	3/20	0.00782916	0.0835816	0	0	7.21154	34.9752	HSPA8;HSPA5;STAT1
Human adenovirus 66 protein VI precursor (gene: L3)	3/20	0.00782916	0.0834489	0	0	7.21154	34.9752	HSPA8;HSPA5;STAT1
Human adenovirus 68 protein VI precursor (gene: L3)	3/20	0.00782916	0.0833167	0	0	7.21154	34.9752	HSPA8;HSPA5;STAT1
Human adenovirus 7 pVI	3/20	0.00782916	0.0831848	0	0	7.21154	34.9752	HSPA8;HSPA5;STAT1
Human adenovirus 71 VI capsid protein (gene: L3)	3/20	0.00782916	0.0830534	0	0	7.21154	34.9752	HSPA8;HSPA5;STAT1
Human adenovirus 7d2 protein VI precursor (gene: L3)	3/20	0.00782916	0.0829224	0	0	7.21154	34.9752	HSPA8;HSPA5;STAT1
Human adenovirus B3 L3 protein pVI (gene: L3)	3/20	0.00782916	0.0827918	0	0	7.21154	34.9752	HSPA8;HSPA5;STAT1
Human enterovirus C118 VP4	3/20	0.00782916	0.0826617	0	0	7.21154	34.9752	STAT1;UBC;SQSTM1
Human gammaherpesvirus 4 BCRF1 protein precursor (gene: BCRF1)	3/20	0.00782916	0.0825319	0	0	7.21154	34.9752	HSPA8;HSPA5;STAT1
Human herpesvirus 4 type 2 BCRF1	3/20	0.00782916	0.0824025	0	0	7.21154	34.9752	HSPA8;HSPA5;STAT1
Human mastadenovirus B capsid protein precursor pVI (gene: L3)	3/20	0.00782916	0.0822736	0	0	7.21154	34.9752	HSPA8;HSPA5;STAT1
Human papillomavirus 132 E7 (gene: E7)	3/20	0.00782916	0.082145	0	0	7.21154	34.9752	STAT1;UBC;SQSTM1
Monkeypox virus virokine protein	3/20	0.00782916	0.0820169	0	0	7.21154	34.9752	HSPA8;STAT1;UBC
Monkeypox virus Zaire-96-I-16 putative virulence factor (gene: P1L)	3/20	0.00782916	0.0818891	0	0	7.21154	34.9752	HSPA8;STAT1;UBC
Monkeypox virus Zaire-96-I-16 R1R (gene: R1R)	3/20	0.00782916	0.0817618	0	0	7.21154	34.9752	HSPA8;HSPA5;STAT1
Monkeypox virus Zaire-96-I-16 glutaredoxin-like protein (gene: G4L)	3/20	0.00782916	0.0816348	0	0	7.21154	34.9752	STAT1;UBC;SQSTM1
Saffold virus capsid protein VP3	3/20	0.00782916	0.0815082	0	0	7.21154	34.9752	STAT1;FLNA;ICAM1
Vaccinia virus glutaredoxin-like protein (gene: G4L)	3/20	0.00782916	0.0813821	0	0	7.21154	34.9752	STAT1;UBC;SQSTM1
Western equine encephalitis virus ponstructural protein P123	3/20	0.00782916	0.0812563	0	0	7.21154	34.9752	STAT1;UBC;DYNLL1
Cowpox virus CPXV076 protein (gene: CPXV076 CDS)	5/60	0.00813129	0.0842618	0	0	4.00641	19.279	ATP5B;HSPA5;STAT1;UBC;RPL13
Sabia mammarenavirus L protein	5/60	0.00813129	0.0841319	0	0	4.00641	19.279	HSPA8;HSP90AB1;HSPA5;STAT1;UBC
Sagiyama virus full_polyprotein 1..1253 (gene: C-E3-E2-6K-E1)	7/110	0.00815224	0.0842189	0	0	3.05944	14.7143	HIST3H2A;H2AFJ;STAT1;PABPC1;SQSTM1;HIST1H2AB;HIST2H2AC
West Nile virus lineage 2 excised_polyprotein 1..791 (gene: flavivirus polyprotein)	7/110	0.00815224	0.0840895	0	0	3.05944	14.7143	NFKBIA;HSPA8;HSP90AB1;STAT1;UBC;PSME1;RPL13
Cowpox virus CPXV209 protein (gene: CPXV209 CDS)	9/167	0.00838929	0.086402	0	0	2.59097	12.3869	HSPA5;STAT1;UBC;MYH9;FLNA;IGFBP7;SQSTM1;ICAM1;VEGFA
Cowpox virus CPXV010 protein (gene: CPXV010 CDS)	2/7	0.00845753	0.0869714	0	0	13.7363	65.559	STAT1;SQSTM1
Rhinovirus A81 2A	2/7	0.00845753	0.0868384	0	0	13.7363	65.559	STAT1;ICAM1
Rhinovirus B14 protease 3C	2/7	0.00845753	0.0867058	0	0	13.7363	65.559	STAT1;ICAM1
Horsepox virus HSPV016 (Epidermal growth factor-like protein; Provisional)	4/39	0.00854222	0.0874405	0	0	4.93097	23.4849	HSPA5;STAT1;UBC;SQSTM1
Human papillomavirus type 118 E7	4/39	0.00854222	0.0873074	0	0	4.93097	23.4849	HSPA5;STAT1;UBC;SQSTM1
Human papillomavirus type 32 early protein (gene: E7)	4/39	0.00854222	0.0871747	0	0	4.93097	23.4849	STAT1;GSTP1;UBC;SQSTM1
Human rhinovirus A24 1C	4/39	0.00854222	0.0870425	0	0	4.93097	23.4849	HSPA5;STAT1;FLNA;ICAM1
Monkeypox virus bifunctional DNA-dependent RNA polymerase subunit rpo30/intermediate-gene transcription factor VITF1	4/39	0.00854222	0.0869106	0	0	4.93097	23.4849	HSP90AB1;HSPA5;STAT1;SQSTM1
Monkeypox virus Zaire-96-I-16 RNA polymerase subunit (gene: F4L)	4/39	0.00854222	0.0867791	0	0	4.93097	23.4849	HSP90AB1;HSPA5;STAT1;SQSTM1
Norovirus Hu/Norwalk/10328/2010/VNM capsid protein VP1 (gene: VP1)	4/39	0.00854222	0.086648	0	0	4.93097	23.4849	STAT1;UBC;FLNA;SQSTM1
Vaccinia virus epidermal growth factor-like protein (EGF-like protein) (gene: C11R)	4/39	0.00854222	0.0865173	0	0	4.93097	23.4849	HSPA5;STAT1;UBC;SQSTM1
Human betaherpesvirus 7 large tegument protein (gene: U31)	6/85	0.00859278	0.0868984	0	0	3.39367	16.1431	UBB;UBC;ISG15;FAU;RPS27A;UBA52
Vaccinia virus IEV and EEV membrane glycoprotein (gene: A34R)	8/139	0.00868487	0.0876976	0	0	2.76702	13.1327	THBD;CXCL9;HSPA5;VWF;STAT1;SFTPD;PABPC1;SFTPA1
Enterovirus H capsid protein VP1	5/61	0.00870982	0.0878175	0	0	3.94073	18.6921	HSPA5;STAT1;UBC;SQSTM1;ICAM1
Horsepox virus HSPV066 (DNA polymerase; Provisional)	5/61	0.00870982	0.0876858	0	0	3.94073	18.6921	HSPA8;HSPA5;STAT1;UBC;SQSTM1
Human betacoronavirus 2c Jordan-N3/2012 ORF4a protein (gene: ORF4a)	5/61	0.00870982	0.0875545	0	0	3.94073	18.6921	HSPA8;HSPA5;STAT1;UBC;SQSTM1
Influenza A virus (A/California/04/2009(H1N1)) hemagglutinin (gene: HA)	5/61	0.00870982	0.0874237	0	0	3.94073	18.6921	CD274;TPM4;STAT1;GBP2;GBP4
Influenza A virus (A/California/07/2009(H1N1)) hemagglutinin (gene: HA)	5/61	0.00870982	0.0872932	0	0	3.94073	18.6921	CD274;TPM4;STAT1;GBP2;GBP4
Norovirus Hu/GII.4/Guangzhou/GZ2010-L88/CHN/2011 major viral capsid protein	5/61	0.00870982	0.0871631	0	0	3.94073	18.6921	LGALS1;HSPA5;STAT1;UBC;SQSTM1
Norovirus Hu/GII.4/Guangzhou/GZ2010-L91/CHN/2011 major viral capsid protein	5/61	0.00870982	0.0870334	0	0	3.94073	18.6921	LGALS1;HSPA5;STAT1;UBC;SQSTM1
Vaccinia virus DNA polymerase (gene: E9L)	5/61	0.00870982	0.0869041	0	0	3.94073	18.6921	HSPA8;HSPA5;STAT1;UBC;SQSTM1
Cercopithecine betaherpesvirus 5 membrane protein US21 (gene: US21)	3/21	0.00899504	0.0896168	0	0	6.86813	32.3563	STAT1;UBC;PABPC1
Cowpox virus CPXV037 protein (gene: CPXV037 CDS)	3/21	0.00899504	0.089484	0	0	6.86813	32.3563	HSPA8;STAT1;UBC
Cyclovirus PK5510 replication-association protein (gene: rep)	3/21	0.00899504	0.0893517	0	0	6.86813	32.3563	STAT1;DYNLL1;SQSTM1
Dengue virus 1 membrane glycoprotein M (gene: flavivirus polyprotein)	3/21	0.00899504	0.0892197	0	0	6.86813	32.3563	HSPA8;HSPA5;UBC
Human adenovirus 18 protein VI (gene: L3)	3/21	0.00899504	0.0890881	0	0	6.86813	32.3563	HSPA8;HSPA5;STAT1
Human adenovirus 21a protein IIIa precursor (gene: L1)	3/21	0.00899504	0.0889569	0	0	6.86813	32.3563	HSPA8;STAT1;UBC
Human adenovirus 31 pIIIa protein (gene: pIIIa)	3/21	0.00899504	0.0888261	0	0	6.86813	32.3563	HSPA8;STAT1;UBC
Human cosavirus E VP3	3/21	0.00899504	0.0886956	0	0	6.86813	32.3563	STAT1;FLNA;ICAM1
Human papillomavirus 179 E1 protein (gene: E1)	3/21	0.00899504	0.0885656	0	0	6.86813	32.3563	STAT1;UBC;SQSTM1
Human papillomavirus 201 E1 (gene: E1)	3/21	0.00899504	0.0884359	0	0	6.86813	32.3563	STAT1;UBC;SQSTM1
Louping ill virus RNA-dependent RNA polymerase	3/21	0.00899504	0.0883066	0	0	6.86813	32.3563	HSPA8;HSPA5;STAT1
Vaccinia virus Ankara Glutaredoxin	3/21	0.00899504	0.0881777	0	0	6.86813	32.3563	STAT1;UBC;SQSTM1
Variola virus putative virulence factor (gene: P1L)	3/21	0.00899504	0.0880491	0	0	6.86813	32.3563	HSPA8;STAT1;UBC
Variola virus glutaredoxin-like protein (gene: H4L)	3/21	0.00899504	0.087921	0	0	6.86813	32.3563	STAT1;UBC;SQSTM1
Horsepox virus HSPV177 (Immunoglobulin like)	20/538	0.00928626	0.0906355	0	0	1.78725	8.36292	CD274;VWF;HSPA5;STAT1;ISG15;PTPRF;ICAM1;VEGFA;CCL7;UBB;CCL5;UBC;FLNA;RPL13;CCL2;IGFBP7;RPS27A;MFGE8;UBA52;SQSTM1
Human adenovirus 11+34 encapsidation protein IVa2 (gene: IVa2)	5/62	0.00931618	0.0907956	0	0	3.87717	18.1297	UBB;HSPA5;STAT1;UBC;ISG15
Human gammaherpesvirus 8 K6 (gene: K6)	5/62	0.00931618	0.090664	0	0	3.87717	18.1297	CXCL9;CCL7;STAT1;CCL5;CCL2
STL polyomavirus large T antigen	5/62	0.00931618	0.0905328	0	0	3.87717	18.1297	HSPA8;HSPA5;STAT1;UBC;RPS20
Ectromelia virus ERPV ntp-pph containing mutt motif	4/40	0.00933875	0.090621	0	0	4.80769	22.4691	STAT1;UBC;MYH9;SQSTM1
Human adenovirus 18 ORF1 protein (gene: E4)	4/40	0.00933875	0.0904902	0	0	4.80769	22.4691	HSP90AB1;STAT1;UBC;SQSTM1
Human mastadenovirus A E4 ORF1	4/40	0.00933875	0.0903598	0	0	4.80769	22.4691	HSP90AB1;STAT1;UBC;SQSTM1
Human papillomavirus type 41 hypothetical protein (gene: ORF E7)	4/40	0.00933875	0.0902298	0	0	4.80769	22.4691	STAT1;GSTP1;UBC;SQSTM1
Human papillomavirus type 6 E2 (gene: E2)	4/40	0.00933875	0.0901002	0	0	4.80769	22.4691	HSPA8;HSPA5;STAT1;UBC
Human rhinovirus QCE 3C	4/40	0.00933875	0.0899709	0	0	4.80769	22.4691	STAT1;UBC;ISG15;SQSTM1
Influenza A virus (A/California/07/2009(H1N1)) HA1 (gene: HA)	4/40	0.00933875	0.089842	0	0	4.80769	22.4691	TPM4;STAT1;GBP2;GBP4
Norovirus GII/Hu/JP/2002/GII.P12_GII.13/Saitama/T80 VP1 (gene: VP1)	4/40	0.00933875	0.0897135	0	0	4.80769	22.4691	STAT1;UBC;FLNA;SQSTM1
Norovirus GII/Hu/JP/2010/GII.P7_GII.7/Musashimurayama/TAKAsanKimchi VP1 (gene: VP1)	4/40	0.00933875	0.0895853	0	0	4.80769	22.4691	HSPA5;STAT1;UBC;SQSTM1
Norovirus Hu/GII-4/CGMH19/2009/TW major viral capsid protein (gene: VP1)	4/40	0.00933875	0.0894575	0	0	4.80769	22.4691	HSPA5;STAT1;UBC;SQSTM1
Norovirus Hu/GII/Seoul1367/KOR/2010 major capsid protein	4/40	0.00933875	0.0893301	0	0	4.80769	22.4691	STAT1;UBC;FLNA;SQSTM1
Powassan virus core protein C	4/40	0.00933875	0.089203	0	0	4.80769	22.4691	HSPA8;HSPA5;STAT1;RPL13
Variola virus hypothetical protein (gene: C5L)	4/40	0.00933875	0.0890763	0	0	4.80769	22.4691	HSPA8;HSPA5;STAT1;UBC
Mumps virus strain Jeryl Lynn phosphoprotein (gene: P)	7/113	0.00938811	0.0894201	0	0	2.97822	13.9032	HSPA8;HSPA5;STAT1;FTH1;UBC;HIST1H2AB;HIST2H2AC
Variola virus hypothetical protein (gene: J9R)	16/398	0.00956227	0.09095	0	0	1.93274	8.98711	CD274;VWF;STAT1;APLP2;ISG15;ICAM1;VEGFA;PTPRB;UBB;CCL5;UBC;FLNA;RPL13;COL6A3;RPS27A;SQSTM1
Dengue virus 3 envelope protein E (gene: flavivirus polyprotein)	5/63	0.009951	0.0945134	0	0	3.81563	17.5904	HSPA8;HSP90AB1;STAT1;UBC;SQSTM1
Rio Bravo virus non-structural protein NS3	5/63	0.009951	0.0943799	0	0	3.81563	17.5904	STAT1;APLP2;UBC;COL6A3;RPS2
Cyclovirus TN25 replication-association protein (gene: rep)	4/41	0.0101821	0.0964356	0	0	4.69043	21.5156	STAT1;UBC;DYNLL1;SQSTM1
Echovirus E7 VP1	4/41	0.0101821	0.0962997	0	0	4.69043	21.5156	STAT1;UBC;ICAM1;TAPBP
Ectromelia virus ERPV NPH-PPH RNA levels regulator containing mutt motif	4/41	0.0101821	0.0961643	0	0	4.69043	21.5156	STAT1;UBC;MYH9;SQSTM1
Ectromelia virus ERPV virion core protease	4/41	0.0101821	0.0960292	0	0	4.69043	21.5156	UBB;STAT1;UBC;SQSTM1
Human papillomavirus 113 E7 protein (gene: E7)	4/41	0.0101821	0.0958945	0	0	4.69043	21.5156	STAT1;UBC;RPS20;SQSTM1
Human papillomavirus type 68a E7 protein	4/41	0.0101821	0.0957602	0	0	4.69043	21.5156	HSPA5;STAT1;UBC;SQSTM1
Norovirus Hu/GII.2/HS255/2011/USA protein p48 (gene: POL)	4/41	0.0101821	0.0956263	0	0	4.69043	21.5156	HSPA8;HSPA5;STAT1;SQSTM1
Norovirus Hu/GII.4/Ohio/7G/2012/USA major capsid protein	4/41	0.0101821	0.0954928	0	0	4.69043	21.5156	STAT1;UBC;FLNA;SQSTM1
Sapovirus Hu/GI/Sapporo/MT-2010/1982 VP1	4/41	0.0101821	0.0953596	0	0	4.69043	21.5156	HSPA8;HSPA5;STAT1;UBC
Cosavirus A VP3	3/22	0.010257	0.0959274	0	0	6.55594	30.0249	STAT1;FLNA;ICAM1
Coxsackievirus A22 vp4	3/22	0.010257	0.0957939	0	0	6.55594	30.0249	STAT1;UBC;SQSTM1
Human adenovirus 11+34 DNA binding protein (gene: E2A)	3/22	0.010257	0.0956609	0	0	6.55594	30.0249	HSP90AB1;STAT1;UBC
Human adenovirus 31 pVI protein (gene: pVI)	3/22	0.010257	0.0955282	0	0	6.55594	30.0249	HSPA8;HSPA5;STAT1
Human adenovirus 61 L3 pVI	3/22	0.010257	0.0953959	0	0	6.55594	30.0249	HSPA8;HSPA5;STAT1
Human genital-associated circular DNA virus-1 RepA	3/22	0.010257	0.095264	0	0	6.55594	30.0249	STAT1;UBC;SQSTM1
Human papillomavirus 120 putative E7 protein (gene: E7)	3/22	0.010257	0.0951324	0	0	6.55594	30.0249	STAT1;UBC;SQSTM1
Human papillomavirus 146 transforming protein (gene: E7)	3/22	0.010257	0.0950012	0	0	6.55594	30.0249	STAT1;UBC;SQSTM1
Human rhinovirus A46 1D (VP1)	3/22	0.010257	0.0948703	0	0	6.55594	30.0249	STAT1;UBC;ICAM1
Molluscum contagiosum virus subtype 1 MC066L (gene: MC066L)	3/22	0.010257	0.0947398	0	0	6.55594	30.0249	GPX1;GPX3;STAT1
Monkeypox virus Zaire-96-I-16 G7R (gene: G7R)	3/22	0.010257	0.0946097	0	0	6.55594	30.0249	HSPA5;STAT1;UBC
Echovirus E30 full_polyprotein 1..2194	7/115	0.0102848	0.0947356	0	0	2.92642	13.3945	STAT1;UBC;DYNLL1;SQSTM1;CFB;ICAM1;TAPBP
Chapare mammarenavirus L polymerase	5/64	0.0106149	0.0976424	0	0	3.75601	17.0729	HSPA8;HSP90AB1;HSPA5;STAT1;UBC
Human adenovirus 66 maturation protein IVA2 (gene: IVa2)	5/64	0.0106149	0.0975088	0	0	3.75601	17.0729	UBB;HSPA5;STAT1;UBC;ISG15
Human betaherpesvirus 5 large tegument protein (gene: UL48)	5/64	0.0106149	0.0973756	0	0	3.75601	17.0729	UBB;UBC;ISG15;RPS27A;UBA52
Dengue virus full_polyprotein 1..3387	6/89	0.010659	0.0976473	0	0	3.24114	14.7191	HSPA8;HSP90AB1;HSPA5;STAT1;UBC;SQSTM1
Circo-like virus-Brazil hs1 putative Rep protein (gene: ORF3)	4/42	0.0110732	0.101304	0	0	4.57875	20.6192	STAT1;UBC;DYNLL1;SQSTM1
Circo-like virus-Brazil hs2 putative Rep protein	4/42	0.0110732	0.101166	0	0	4.57875	20.6192	STAT1;UBC;DYNLL1;SQSTM1
Cyclovirus NG12 replication-association protein (gene: rep)	4/42	0.0110732	0.101028	0	0	4.57875	20.6192	STAT1;UBC;DYNLL1;SQSTM1
Human circovirus VS6600022 replication-associated protein	4/42	0.0110732	0.100891	0	0	4.57875	20.6192	HSPA5;STAT1;UBC;SQSTM1
Human papillomavirus type 30 early protein (gene: E7)	4/42	0.0110732	0.100755	0	0	4.57875	20.6192	STAT1;GSTP1;UBC;SQSTM1
Human immunodeficiency virus 2 full_polyprotein 1..1550 (gene: gag-pol)	11/237	0.0111015	0.100875	0	0	2.23142	10.0429	ATP5B;HSPA8;HSP90AB1;HSPA5;STAT1;UBC;PSME1;GBP2;CTSD;SQSTM1;PPID
Duvenhage lyssavirus phosphoprotein (gene: P)	2/8	0.0111224	0.100929	0	0	12.0192	54.072	STAT1;DYNLL1
Enterovirus C protease 3C	2/8	0.0111224	0.100792	0	0	12.0192	54.072	STAT1;ICAM1
European bat 2 lyssavirus phosphoprotein (gene: P)	2/8	0.0111224	0.100656	0	0	12.0192	54.072	STAT1;DYNLL1
KI polyomavirus Stockholm 350 small T antigen	2/8	0.0111224	0.100521	0	0	12.0192	54.072	STAT1;UBC
Modoc virus PreM protein	2/8	0.0111224	0.100386	0	0	12.0192	54.072	HSPA5;STAT1
Rabies lyssavirus phosphoprotein M1	2/8	0.0111224	0.100251	0	0	12.0192	54.072	STAT1;DYNLL1
Rhinovirus A81 3C	2/8	0.0111224	0.100117	0	0	12.0192	54.072	STAT1;ICAM1
Vaccinia virus Ankara NTP-dependent RNA helicase, NPH-II	6/90	0.0112261	0.100915	0	0	3.20513	14.3895	DDX17;HSPA8;DDX5;STAT1;UBC;PABPC1
HBV genotype C HBc protein (gene: C)	5/65	0.0113084	0.101519	0	0	3.69822	16.5762	HSPA8;HSPA5;STAT1;UBC;RPL35
Human rhinovirus A12 full_polyprotein 1..2155	5/65	0.0113084	0.101383	0	0	3.69822	16.5762	HSPA5;STAT1;UBC;SQSTM1;ICAM1
JC polyomavirus hypothetical protein	5/65	0.0113084	0.101248	0	0	3.69822	16.5762	HSPA8;HSPA5;STAT1;UBC;RPS20
Cercopithecine betaherpesvirus 5 uracil-DNA glycosylase (gene: UL114)	3/23	0.0116165	0.103868	0	0	6.2709	27.9389	STAT1;RPS20;RPS2
Echovirus E25 VP4	3/23	0.0116165	0.10373	0	0	6.2709	27.9389	STAT1;UBC;SQSTM1
Human adenovirus 11a E2A DNA binding protein	3/23	0.0116165	0.103592	0	0	6.2709	27.9389	HSP90AB1;STAT1;UBC
Human adenovirus 14 DNA binding protein (gene: E2A)	3/23	0.0116165	0.103454	0	0	6.2709	27.9389	HSP90AB1;STAT1;UBC
Human adenovirus 31 protease (gene: protease)	3/23	0.0116165	0.103317	0	0	6.2709	27.9389	STAT1;UBC;DYNLL1
Human adenovirus 34 DNA binding protein (gene: E2A)	3/23	0.0116165	0.103181	0	0	6.2709	27.9389	HSP90AB1;STAT1;UBC
Human adenovirus 5 DBP	3/23	0.0116165	0.103044	0	0	6.2709	27.9389	STAT1;UBC;HIST1H2AB
Human adenovirus 55 E2A 58.3 kDa DNA-binding protein	3/23	0.0116165	0.102909	0	0	6.2709	27.9389	HSP90AB1;STAT1;UBC
Human adenovirus 61 L1 pIIIa	3/23	0.0116165	0.102773	0	0	6.2709	27.9389	HSPA8;HSPA5;UBC
Human adenovirus 61 L3 Protease	3/23	0.0116165	0.102638	0	0	6.2709	27.9389	STAT1;UBC;DYNLL1
Human papillomavirus 109 E1 protein (gene: E1)	3/23	0.0116165	0.102503	0	0	6.2709	27.9389	STAT1;UBC;SQSTM1
Human papillomavirus 123 transforming protein E7 (gene: E7)	3/23	0.0116165	0.102368	0	0	6.2709	27.9389	STAT1;UBC;SQSTM1
Human papillomavirus type 16 E1 (gene: E1)	3/23	0.0116165	0.102234	0	0	6.2709	27.9389	STAT1;UBC;SQSTM1
Human papillomavirus type 16 replication protein E1 (gene: E1)	3/23	0.0116165	0.1021	0	0	6.2709	27.9389	STAT1;UBC;SQSTM1
Molluscum contagiosum virus subtype 1 MC099R (gene: MC099R)	6/91	0.0118142	0.103703	0	0	3.16991	14.0695	HSPA5;STAT1;UBC;MYH9;ISG15;SQSTM1
Dugbe virus L protein	8/147	0.0119292	0.104575	0	0	2.61643	11.5876	UBB;STAT1;UBC;ISG15;FAU;RPS27A;SQSTM1;UBA52
Coxsackievirus A1 VP1	4/43	0.0120131	0.105174	0	0	4.47227	19.7753	HSPA5;STAT1;FLNA;ICAM1
Human gammaherpesvirus 4 large tegument protein (gene: BPLF1)	4/43	0.0120131	0.105037	0	0	4.47227	19.7753	UBC;ISG15;RPS27A;SQSTM1
Human herpesvirus 4 type 2 BPLF1	4/43	0.0120131	0.1049	0	0	4.47227	19.7753	UBC;ISG15;RPS27A;SQSTM1
Monkeypox virus bifunctional ATPase/nucleoside triphosphate phosphohydrolase-I	4/43	0.0120131	0.104764	0	0	4.47227	19.7753	DDX17;DDX5;STAT1;UBC
Monkeypox virus Zaire-96-I-16 E11L (gene: E11L)	4/43	0.0120131	0.104628	0	0	4.47227	19.7753	DDX17;DDX5;STAT1;UBC
Norovirus Hu/GII.4/NIHIC1.13/2012/USA capsid protein VP1 (gene: VP1)	4/43	0.0120131	0.104492	0	0	4.47227	19.7753	STAT1;UBC;FLNA;SQSTM1
Norovirus Hu/GII.4/NIHIC1.16/2012/USA capsid protein VP1 (gene: VP1)	4/43	0.0120131	0.104357	0	0	4.47227	19.7753	STAT1;UBC;FLNA;SQSTM1
Human papillomavirus 152 early protein E2 (gene: E2)	5/66	0.0120322	0.104388	0	0	3.64219	16.0991	STAT1;RPL23;RPS20;PABPC1;DYNLL1
Human parechovirus 5 full_polyprotein 1..2185	5/66	0.0120322	0.104253	0	0	3.64219	16.0991	HSPA5;STAT1;FTH1;UBC;SQSTM1
Vaccinia virus Ankara DNA polymerase	5/66	0.0120322	0.104119	0	0	3.64219	16.0991	HSPA8;HSPA5;STAT1;UBC;SQSTM1
Monkeypox virus unknown protein	7/119	0.0122627	0.105977	0	0	2.82805	12.4468	HSPA8;TPM4;HSPA5;STAT1;UBC;MYH9;SQSTM1
Papiine alphaherpesvirus 2 large tegument protein (gene: UL36)	7/119	0.0122627	0.10584	0	0	2.82805	12.4468	UBB;TPM3;STAT1;UBC;ISG15;RPS27A;SQSTM1
Human alphaherpesvirus 2 envelope glycoprotein C (gene: UL44)	10/209	0.01241	0.106975	0	0	2.30033	10.0967	CD274;PTPRB;UBB;HSPA5;VWF;STAT1;UBC;ISG15;SQSTM1;TAPBP
Human enteric coronavirus strain 4408 full_polyprotein 1..4383	6/92	0.0124237	0.106955	0	0	3.13545	13.7588	HSPA8;HSPA5;STAT1;UBC;RPL35;SQSTM1
Cowpox virus CPXV075 protein (gene: CPXV075 CDS)	5/67	0.0127868	0.10994	0	0	3.58783	15.6406	HSPA8;HSPA5;STAT1;UBC;SQSTM1
Ectromelia virus ERPV profilin-like protein	5/67	0.0127868	0.1098	0	0	3.58783	15.6406	ACTA2;HSPA8;STAT1;DYNLL1;SQSTM1
Parainfluenza virus 5 phosphoprotein (gene: V/P)	5/67	0.0127868	0.10966	0	0	3.58783	15.6406	HSPA8;HSPA5;STAT1;UBC;HIST1H2AB
West Nile virus lineage 2 envelope protein E (gene: flavivirus polyprotein)	5/67	0.0127868	0.10952	0	0	3.58783	15.6406	HSPA8;HSP90AB1;STAT1;PSME1;RPL13
Echovirus E32 VP1	4/44	0.0130026	0.111226	0	0	4.37063	18.9799	STAT1;UBC;ICAM1;TAPBP
Enterovirus B111 VP1	4/44	0.0130026	0.111085	0	0	4.37063	18.9799	STAT1;UBC;ICAM1;TAPBP
Human adenovirus 6 24 kDa protein	4/44	0.0130026	0.110944	0	0	4.37063	18.9799	HSP90AB1;STAT1;UBC;SQSTM1
Norovirus Hu/Norwalk/10235/2009/VNM capsid protein VP1 (gene: VP1)	4/44	0.0130026	0.110803	0	0	4.37063	18.9799	HSPA5;STAT1;UBC;SQSTM1
Yaba-like disease virus 134R protein (gene: 134R)	4/44	0.0130026	0.110663	0	0	4.37063	18.9799	HSPA5;STAT1;UBC;SQSTM1
Human papillomavirus type 68a E2 protein	6/93	0.0130549	0.110967	0	0	3.10174	13.4572	EEF1G;HSPA5;STAT1;RPS20;PABPC1;DYNLL1
Alphapapillomavirus 3 replication protein E1 (gene: E1)	3/24	0.0130746	0.110994	0	0	6.00962	26.0642	STAT1;UBC;SQSTM1
Human adenovirus 2 DBP	3/24	0.0130746	0.110854	0	0	6.00962	26.0642	STAT1;UBC;HIST1H2AB
Human adenovirus 6 DBP 59 kDa protein (gene: E2A)	3/24	0.0130746	0.110714	0	0	6.00962	26.0642	STAT1;UBC;HIST1H2AB
Human adenovirus 7d2 DNA binding protein (gene: E2A)	3/24	0.0130746	0.110575	0	0	6.00962	26.0642	HSP90AB1;STAT1;UBC
Human cosavirus E VP2	3/24	0.0130746	0.110436	0	0	6.00962	26.0642	HSPA5;STAT1;ICAM1
Human mastadenovirus C single-stranded DNA-binding protein (gene: E2A)	3/24	0.0130746	0.110297	0	0	6.00962	26.0642	STAT1;UBC;HIST1H2AB
Human papillomavirus 178 E7 protein (gene: E7)	3/24	0.0130746	0.110158	0	0	6.00962	26.0642	HSPA5;UBC;SQSTM1
Human papillomavirus type 6 E7 (gene: E7)	3/24	0.0130746	0.11002	0	0	6.00962	26.0642	STAT1;UBC;SQSTM1
Norovirus Hu/GII.3/HK71/1978/CHN 3C-like protease (gene: POL)	3/24	0.0130746	0.109883	0	0	6.00962	26.0642	HSP90AB1;STAT1;SQSTM1
Norovirus Hu/GII.4/CHDC5191/1974/USA 3C-like protease (gene: POL)	3/24	0.0130746	0.109745	0	0	6.00962	26.0642	HSP90AB1;STAT1;SQSTM1
Norovirus Hu/GII.4/HS288/2012/USA 3C-like protease (gene: POL)	3/24	0.0130746	0.109608	0	0	6.00962	26.0642	HSP90AB1;STAT1;SQSTM1
Norovirus Hu/GII.4/NIHIC13/2011/USA 3C-like protease (gene: POL)	3/24	0.0130746	0.109472	0	0	6.00962	26.0642	HSP90AB1;STAT1;SQSTM1
Norovirus Hu/GII.4/NIHIC18.1/2012/USA 3C-like protease (gene: POL)	3/24	0.0130746	0.109335	0	0	6.00962	26.0642	HSP90AB1;STAT1;SQSTM1
Norovirus Hu/GII.4/NIHIC27.1/2012/USA 3C-like protease (gene: POL)	3/24	0.0130746	0.109199	0	0	6.00962	26.0642	HSP90AB1;STAT1;SQSTM1
Norovirus Hu/GII.4/NIHIC27.2/2012/USA 3C-like protease (gene: POL)	3/24	0.0130746	0.109064	0	0	6.00962	26.0642	HSP90AB1;STAT1;SQSTM1
Norovirus Hu/GII.6/CHDC4073/1984/USA 3C-like protease (gene: POL)	3/24	0.0130746	0.108928	0	0	6.00962	26.0642	HSP90AB1;STAT1;SQSTM1
Norovirus Hu/GII.6/HS245/2010/USA 3C-like protease (gene: POL)	3/24	0.0130746	0.108793	0	0	6.00962	26.0642	HSP90AB1;STAT1;SQSTM1
Norovirus Hu/GII/20469/2010/VNM 3C-like protease (gene: POL)	3/24	0.0130746	0.108659	0	0	6.00962	26.0642	HSP90AB1;STAT1;SQSTM1
Norovirus Hu/GII/20477/2010/VNM 3C-like protease (gene: POL)	3/24	0.0130746	0.108524	0	0	6.00962	26.0642	HSP90AB1;STAT1;SQSTM1
Norovirus Hu/GII/BG1C0004/2010/BGD 3C-like protease (gene: POL)	3/24	0.0130746	0.10839	0	0	6.00962	26.0642	HSP90AB1;STAT1;SQSTM1
Norovirus Hu/GII/BG1C0066/2011/BGD 3C-like protease (gene: POL)	3/24	0.0130746	0.108257	0	0	6.00962	26.0642	HSP90AB1;STAT1;SQSTM1
Norovirus Hu/GII/BG1C0204/2011/BGD 3C-like protease (gene: POL)	3/24	0.0130746	0.108123	0	0	6.00962	26.0642	HSP90AB1;STAT1;SQSTM1
Norovirus Hu/GII/BG1C0241-33/2011/BGD 3C-like protease (gene: POL)	3/24	0.0130746	0.10799	0	0	6.00962	26.0642	HSP90AB1;STAT1;SQSTM1
Norovirus Hu/GII/BG1C0270/2011/BGD 3C-like protease (gene: POL)	3/24	0.0130746	0.107858	0	0	6.00962	26.0642	HSP90AB1;STAT1;SQSTM1
Norovirus Hu/GII/BG1C0282/2011/BGD 3C-like protease (gene: POL)	3/24	0.0130746	0.107725	0	0	6.00962	26.0642	HSP90AB1;STAT1;SQSTM1
Norovirus Hu/GII/BG1C0317/2011/BGD 3C-like protease (gene: POL)	3/24	0.0130746	0.107593	0	0	6.00962	26.0642	HSP90AB1;STAT1;SQSTM1
Norovirus Hu/GII/BG1C0405/2012/BGD 3C-like protease (gene: POL)	3/24	0.0130746	0.107462	0	0	6.00962	26.0642	HSP90AB1;STAT1;SQSTM1
Norovirus Hu/Norwalk/10285/2010/VNM 3C-like protease (gene: POL)	3/24	0.0130746	0.10733	0	0	6.00962	26.0642	HSP90AB1;STAT1;SQSTM1
Norovirus Hu/Norwalk/10313/2010/VNM 3C-like protease (gene: POL)	3/24	0.0130746	0.107199	0	0	6.00962	26.0642	HSP90AB1;STAT1;SQSTM1
Norovirus Hu/Norwalk/10325/2010/VNM 3C-like protease (gene: POL)	3/24	0.0130746	0.107069	0	0	6.00962	26.0642	HSP90AB1;STAT1;SQSTM1
Norovirus Hu/Norwalk/10328/2010/VNM 3C-like protease (gene: POL)	3/24	0.0130746	0.106938	0	0	6.00962	26.0642	HSP90AB1;STAT1;SQSTM1
Norovirus Hu/Norwalk/10368/2010/VNM 3C-like protease (gene: POL)	3/24	0.0130746	0.106808	0	0	6.00962	26.0642	HSP90AB1;STAT1;SQSTM1
Norovirus Hu/Norwalk/10378/2010/VNM 3C-like protease (gene: POL)	3/24	0.0130746	0.106678	0	0	6.00962	26.0642	HSP90AB1;STAT1;SQSTM1
Norovirus Hu/Norwalk/10386/2010/VNM 3C-like protease (gene: POL)	3/24	0.0130746	0.106549	0	0	6.00962	26.0642	HSP90AB1;STAT1;SQSTM1
Rio Bravo virus RNA-dependent RNA polymerase	3/24	0.0130746	0.10642	0	0	6.00962	26.0642	HSPA8;HSPA5;STAT1
Titi monkey adenovirus ECC-2011 pIIIa	3/24	0.0130746	0.106291	0	0	6.00962	26.0642	HSPA8;HSPA5;STAT1
Cowpox virus CPXV194 protein (gene: CPXV194 CDS)	12/276	0.0132628	0.10769	0	0	2.0903	9.03594	PTPRB;UBB;VWF;STAT1;UBC;FLNA;RPL13;ISG15;RPS27A;SQSTM1;ICAM1;VEGFA
Dengue virus 4 envelope protein E (gene: flavivirus polyprotein)	6/94	0.0137082	0.111173	0	0	3.06874	13.1642	HSPA8;HSP90AB1;STAT1;UBC;PSME1;SQSTM1
Ravn virus - Ravn, Kenya, 1987 glycoprotein (gene: GP)	6/94	0.0137082	0.111038	0	0	3.06874	13.1642	HSPA8;TPM4;HSPA5;TPM3;STAT1;UBC
Yaba monkey tumor virus Ig domain OX-2-like protein	9/181	0.0137133	0.110946	0	0	2.39057	10.2541	UBB;VWF;CCL7;STAT1;UBC;RPL13;SQSTM1;ICAM1;VEGFA
Vaccinia virus Kelch-like protein (gene: F3L)	11/245	0.0139419	0.11266	0	0	2.15856	9.22319	LGALS3BP;HSPA8;HSP90AB1;UBB;HSPA5;STAT1;UBC;RPL13;ISG15;RPS27A;SQSTM1
Vaccinia virus Ankara Kelch-like protein	11/245	0.0139419	0.112524	0	0	2.15856	9.22319	LGALS3BP;HSPA8;HSP90AB1;UBB;HSPA5;STAT1;UBC;RPL13;ISG15;RPS27A;SQSTM1
Coxsackievirus A12 VP1 protein	4/45	0.0140426	0.113201	0	0	4.2735	18.2293	DAXX;STAT1;UBC;SQSTM1
Human adenovirus 31 E4 ORF1 protein (gene: E4 ORF1)	4/45	0.0140426	0.113065	0	0	4.2735	18.2293	HSP90AB1;STAT1;UBC;SQSTM1
Human adenovirus 34 Orf1 protein (gene: E4)	4/45	0.0140426	0.11293	0	0	4.2735	18.2293	HSP90AB1;STAT1;UBC;SQSTM1
Human papillomavirus 122 transforming protein E7 (gene: E7)	4/45	0.0140426	0.112795	0	0	4.2735	18.2293	STAT1;UBC;RPS20;SQSTM1
Norovirus Hu/GII/10037/2009/VNM capsid protein VP1 (gene: VP1)	4/45	0.0140426	0.11266	0	0	4.2735	18.2293	HSPA5;STAT1;UBC;SQSTM1
Norovirus Hu/GII/BG1C0066/2011/BGD capsid protein VP1 (gene: VP1)	4/45	0.0140426	0.112525	0	0	4.2735	18.2293	STAT1;UBC;FLNA;SQSTM1
Norovirus Hu/GII/BG1C0282/2011/BGD capsid protein VP1 (gene: VP1)	4/45	0.0140426	0.112391	0	0	4.2735	18.2293	STAT1;UBC;FLNA;SQSTM1
Norovirus Hu/Norwalk/10199/2009/VNM capsid protein VP1 (gene: VP1)	4/45	0.0140426	0.112258	0	0	4.2735	18.2293	HSPA5;STAT1;UBC;SQSTM1
Norovirus Hu/Norwalk/20008/2009/VNM capsid protein VP1 (gene: VP1)	4/45	0.0140426	0.112124	0	0	4.2735	18.2293	HSPA5;STAT1;UBC;SQSTM1
Norovirus Hu/Norwalk/20066/2009/VNM capsid protein VP1 (gene: VP1)	4/45	0.0140426	0.111991	0	0	4.2735	18.2293	HSPA5;STAT1;UBC;SQSTM1
Yaba-like disease virus 18L protein (gene: 18L)	4/45	0.0140426	0.111858	0	0	4.2735	18.2293	HSPA8;STAT1;UBC;SQSTM1
Australian bat lyssavirus phosphoprotein (gene: P)	2/9	0.014105	0.112221	0	0	10.6838	45.526	STAT1;DYNLL1
Horsepox virus HSPV006	2/9	0.014105	0.112089	0	0	10.6838	45.526	HSPA5;STAT1
Human coronavirus OC43 nsp9 (gene: orf1ab)	2/9	0.014105	0.111956	0	0	10.6838	45.526	RAMP2;UBC
Variola virus hypothetical protein (gene: B23R)	2/9	0.014105	0.111824	0	0	10.6838	45.526	HSPA8;STAT1
Horsepox virus HSPV162	10/214	0.0144411	0.114354	0	0	2.24659	9.5203	THBD;CXCL9;HSP90AB1;CD93;HSPA5;VWF;STAT1;UBC;SFTPA1;PTPRF
Enterovirus C protein 3CD	3/25	0.0146325	0.115733	0	0	5.76923	24.3722	STAT1;SQSTM1;ICAM1
Horsepox virus HSPV074d (ribonucleoside--diphosphate reductase large subunit)	3/25	0.0146325	0.115597	0	0	5.76923	24.3722	HSPA8;STAT1;UBC
Human adenovirus 12 virus encoded endoprotease (Late protein 3)	3/25	0.0146325	0.115461	0	0	5.76923	24.3722	STAT1;UBC;DYNLL1
Human betaherpesvirus 5 uracil-DNA glycosylase (gene: UL114)	3/25	0.0146325	0.115325	0	0	5.76923	24.3722	STAT1;RPS20;RPS2
Human betaherpesvirus 5 DNA polymerase catalytic subunit (gene: UL54)	3/25	0.0146325	0.11519	0	0	5.76923	24.3722	HSPA8;HSPA5;UBC
Human mastadenovirus A protease	3/25	0.0146325	0.115055	0	0	5.76923	24.3722	STAT1;UBC;DYNLL1
Human papillomavirus 143 transforming protein (gene: E7)	3/25	0.0146325	0.114921	0	0	5.76923	24.3722	HSPA5;UBC;SQSTM1
Human papillomavirus 15 early protein (gene: E1)	3/25	0.0146325	0.114786	0	0	5.76923	24.3722	STAT1;UBC;SQSTM1
Human papillomavirus type 137 transforming protein (gene: E7)	3/25	0.0146325	0.114652	0	0	5.76923	24.3722	STAT1;UBC;SQSTM1
Human papillomavirus type 72b E1 protein (gene: E1)	3/25	0.0146325	0.114519	0	0	5.76923	24.3722	STAT1;UBC;SQSTM1
Human papillomavirus type 92 E7	3/25	0.0146325	0.114385	0	0	5.76923	24.3722	STAT1;UBC;SQSTM1
Human poliovirus 1 Mahoney excised_polyprotein 1566..2209	3/25	0.0146325	0.114252	0	0	5.76923	24.3722	STAT1;SQSTM1;ICAM1
Human rhinovirus A33 2C	3/25	0.0146325	0.11412	0	0	5.76923	24.3722	STAT1;UBC;HIST2H2AC
Norovirus Hu/GII.4/20199/2009/VNM 3C-like protease (gene: POL)	3/25	0.0146325	0.113987	0	0	5.76923	24.3722	HSP90AB1;STAT1;SQSTM1
Norovirus Hu/GII.4/HS292/2012/USA 3C-like protease (gene: POL)	3/25	0.0146325	0.113855	0	0	5.76923	24.3722	HSP90AB1;STAT1;SQSTM1
Norovirus Hu/GII.4/HS66/2001/USA 3C-like protease (gene: POL)	3/25	0.0146325	0.113723	0	0	5.76923	24.3722	HSP90AB1;STAT1;SQSTM1
Norovirus Hu/GII.4/NIHIC1.13/2012/USA 3C-like protease (gene: POL)	3/25	0.0146325	0.113592	0	0	5.76923	24.3722	HSP90AB1;STAT1;SQSTM1
Norovirus Hu/GII.4/NIHIC1.16/2012/USA 3C-like protease (gene: POL)	3/25	0.0146325	0.113461	0	0	5.76923	24.3722	HSP90AB1;STAT1;SQSTM1
Norovirus Hu/GII.4/NIHIC17.8/2013/USA 3C-like protease (gene: POL)	3/25	0.0146325	0.11333	0	0	5.76923	24.3722	HSP90AB1;STAT1;SQSTM1
Norovirus Hu/GII.4/NIHIC17.9/2013/USA 3C-like protease (gene: POL)	3/25	0.0146325	0.113199	0	0	5.76923	24.3722	HSP90AB1;STAT1;SQSTM1
Norovirus Hu/GII.4/NIHIC2.2/2010/USA 3C-like protease (gene: POL)	3/25	0.0146325	0.113069	0	0	5.76923	24.3722	HSP90AB1;STAT1;SQSTM1
Norovirus Hu/GII.4/NIHIC2.3/2010/USA 3C-like protease (gene: POL)	3/25	0.0146325	0.112939	0	0	5.76923	24.3722	HSP90AB1;STAT1;SQSTM1
Norovirus Hu/GII.4/NIHIC28.4/2012/USA 3C-like protease (gene: POL)	3/25	0.0146325	0.11281	0	0	5.76923	24.3722	HSP90AB1;STAT1;SQSTM1
Norovirus Hu/GII.4/NIHIC28.5/2012/USA 3C-like protease (gene: POL)	3/25	0.0146325	0.11268	0	0	5.76923	24.3722	HSP90AB1;STAT1;SQSTM1
Norovirus Hu/GII/10002/2009/VNM 3C-like protease (gene: POL)	3/25	0.0146325	0.112551	0	0	5.76923	24.3722	HSP90AB1;STAT1;SQSTM1
Norovirus Hu/GII/10003/2009/VNM 3C-like protease (gene: POL)	3/25	0.0146325	0.112422	0	0	5.76923	24.3722	HSP90AB1;STAT1;SQSTM1
Norovirus Hu/GII/10012/2009/VNM 3C-like protease (gene: POL)	3/25	0.0146325	0.112294	0	0	5.76923	24.3722	HSP90AB1;STAT1;SQSTM1
Norovirus Hu/GII/10037/2009/VNM 3C-like protease (gene: POL)	3/25	0.0146325	0.112166	0	0	5.76923	24.3722	HSP90AB1;STAT1;SQSTM1
Norovirus Hu/Norwalk/10034/2009/VNM 3C-like protease (gene: POL)	3/25	0.0146325	0.112038	0	0	5.76923	24.3722	HSP90AB1;STAT1;SQSTM1
Norovirus Hu/Norwalk/10051/2009/VNM 3C-like protease (gene: POL)	3/25	0.0146325	0.11191	0	0	5.76923	24.3722	HSP90AB1;STAT1;SQSTM1
Norovirus Hu/Norwalk/10054/2009/VNM 3C-like protease (gene: POL)	3/25	0.0146325	0.111783	0	0	5.76923	24.3722	HSP90AB1;STAT1;SQSTM1
Norovirus Hu/Norwalk/10062/2009/VNM 3C-like protease (gene: POL)	3/25	0.0146325	0.111656	0	0	5.76923	24.3722	HSP90AB1;STAT1;SQSTM1
Norovirus Hu/Norwalk/10074/2009/VNM 3C-like protease (gene: POL)	3/25	0.0146325	0.111529	0	0	5.76923	24.3722	HSP90AB1;STAT1;SQSTM1
Norovirus Hu/Norwalk/10075/2009/VNM 3C-like protease (gene: POL)	3/25	0.0146325	0.111403	0	0	5.76923	24.3722	HSP90AB1;STAT1;SQSTM1
Norovirus Hu/Norwalk/10078/2009/VNM 3C-like protease (gene: POL)	3/25	0.0146325	0.111276	0	0	5.76923	24.3722	HSP90AB1;STAT1;SQSTM1
Norovirus Hu/Norwalk/10079/2009/VNM 3C-like protease (gene: POL)	3/25	0.0146325	0.111151	0	0	5.76923	24.3722	HSP90AB1;STAT1;SQSTM1
Norovirus Hu/Norwalk/10110/2009/VNM 3C-like protease (gene: POL)	3/25	0.0146325	0.111025	0	0	5.76923	24.3722	HSP90AB1;STAT1;SQSTM1
Norovirus Hu/Norwalk/10114/2009/VNM 3C-like protease (gene: POL)	3/25	0.0146325	0.1109	0	0	5.76923	24.3722	HSP90AB1;STAT1;SQSTM1
Norovirus Hu/Norwalk/10116/2009/VNM 3C-like protease (gene: POL)	3/25	0.0146325	0.110775	0	0	5.76923	24.3722	HSP90AB1;STAT1;SQSTM1
Norovirus Hu/Norwalk/10129/2009/VNM 3C-like protease (gene: POL)	3/25	0.0146325	0.11065	0	0	5.76923	24.3722	HSP90AB1;STAT1;SQSTM1
Norovirus Hu/Norwalk/10136/2009/VNM 3C-like protease (gene: POL)	3/25	0.0146325	0.110525	0	0	5.76923	24.3722	HSP90AB1;STAT1;SQSTM1
Norovirus Hu/Norwalk/10137/2009/VNM 3C-like protease (gene: POL)	3/25	0.0146325	0.110401	0	0	5.76923	24.3722	HSP90AB1;STAT1;SQSTM1
Norovirus Hu/Norwalk/10145/2009/VNM 3C-like protease (gene: POL)	3/25	0.0146325	0.110277	0	0	5.76923	24.3722	HSP90AB1;STAT1;SQSTM1
Norovirus Hu/Norwalk/10148/2009/VNM 3C-like protease (gene: POL)	3/25	0.0146325	0.110154	0	0	5.76923	24.3722	HSP90AB1;STAT1;SQSTM1
Norovirus Hu/Norwalk/10158/2009/VNM 3C-like protease (gene: POL)	3/25	0.0146325	0.11003	0	0	5.76923	24.3722	HSP90AB1;STAT1;SQSTM1
Norovirus Hu/Norwalk/10160/2009/VNM 3C-like protease (gene: POL)	3/25	0.0146325	0.109907	0	0	5.76923	24.3722	HSP90AB1;STAT1;SQSTM1
Norovirus Hu/Norwalk/10162/2009/VNM 3C-like protease (gene: POL)	3/25	0.0146325	0.109784	0	0	5.76923	24.3722	HSP90AB1;STAT1;SQSTM1
Norovirus Hu/Norwalk/10163/2009/VNM 3C-like protease (gene: POL)	3/25	0.0146325	0.109662	0	0	5.76923	24.3722	HSP90AB1;STAT1;SQSTM1
Norovirus Hu/Norwalk/10169/2009/VNM 3C-like protease (gene: POL)	3/25	0.0146325	0.10954	0	0	5.76923	24.3722	HSP90AB1;STAT1;SQSTM1
Norovirus Hu/Norwalk/10173/2009/VNM 3C-like protease (gene: POL)	3/25	0.0146325	0.109418	0	0	5.76923	24.3722	HSP90AB1;STAT1;SQSTM1
Norovirus Hu/Norwalk/10176/2009/VNM 3C-like protease (gene: POL)	3/25	0.0146325	0.109296	0	0	5.76923	24.3722	HSP90AB1;STAT1;SQSTM1
Norovirus Hu/Norwalk/10177/2009/VNM 3C-like protease (gene: POL)	3/25	0.0146325	0.109175	0	0	5.76923	24.3722	HSP90AB1;STAT1;SQSTM1
Norovirus Hu/Norwalk/10179/2009/VNM 3C-like protease (gene: POL)	3/25	0.0146325	0.109053	0	0	5.76923	24.3722	HSP90AB1;STAT1;SQSTM1
Norovirus Hu/Norwalk/10182/2009/VNM 3C-like protease (gene: POL)	3/25	0.0146325	0.108932	0	0	5.76923	24.3722	HSP90AB1;STAT1;SQSTM1
Norovirus Hu/Norwalk/10183/2009/VNM 3C-like protease (gene: POL)	3/25	0.0146325	0.108812	0	0	5.76923	24.3722	HSP90AB1;STAT1;SQSTM1
Norovirus Hu/Norwalk/10194/2009/VNM 3C-like protease (gene: POL)	3/25	0.0146325	0.108691	0	0	5.76923	24.3722	HSP90AB1;STAT1;SQSTM1
Norovirus Hu/Norwalk/10199/2009/VNM 3C-like protease (gene: POL)	3/25	0.0146325	0.108571	0	0	5.76923	24.3722	HSP90AB1;STAT1;SQSTM1
Norovirus Hu/Norwalk/10203/2009/VNM 3C-like protease (gene: POL)	3/25	0.0146325	0.108452	0	0	5.76923	24.3722	HSP90AB1;STAT1;SQSTM1
Norovirus Hu/Norwalk/10204/2009/VNM 3C-like protease (gene: POL)	3/25	0.0146325	0.108332	0	0	5.76923	24.3722	HSP90AB1;STAT1;SQSTM1
Norovirus Hu/Norwalk/10222/2009/VNM 3C-like protease (gene: POL)	3/25	0.0146325	0.108213	0	0	5.76923	24.3722	HSP90AB1;STAT1;SQSTM1
Norovirus Hu/Norwalk/10223/2009/VNM 3C-like protease (gene: POL)	3/25	0.0146325	0.108094	0	0	5.76923	24.3722	HSP90AB1;STAT1;SQSTM1
Norovirus Hu/Norwalk/10235/2009/VNM 3C-like protease (gene: POL)	3/25	0.0146325	0.107975	0	0	5.76923	24.3722	HSP90AB1;STAT1;SQSTM1
Norovirus Hu/Norwalk/10236/2009/VNM 3C-like protease (gene: POL)	3/25	0.0146325	0.107856	0	0	5.76923	24.3722	HSP90AB1;STAT1;SQSTM1
Norovirus Hu/Norwalk/10238/2009/VNM 3C-like protease (gene: POL)	3/25	0.0146325	0.107738	0	0	5.76923	24.3722	HSP90AB1;STAT1;SQSTM1
Norovirus Hu/Norwalk/10247/2009/VNM 3C-like protease (gene: POL)	3/25	0.0146325	0.10762	0	0	5.76923	24.3722	HSP90AB1;STAT1;SQSTM1
Norovirus Hu/Norwalk/10255/2009/VNM 3C-like protease (gene: POL)	3/25	0.0146325	0.107502	0	0	5.76923	24.3722	HSP90AB1;STAT1;SQSTM1
Norovirus Hu/Norwalk/10296/2010/VNM 3C-like protease (gene: POL)	3/25	0.0146325	0.107385	0	0	5.76923	24.3722	HSP90AB1;STAT1;SQSTM1
Norovirus Hu/Norwalk/20008/2009/VNM 3C-like protease (gene: POL)	3/25	0.0146325	0.107268	0	0	5.76923	24.3722	HSP90AB1;STAT1;SQSTM1
Norovirus Hu/Norwalk/20010/2009/VNM 3C-like protease (gene: POL)	3/25	0.0146325	0.107151	0	0	5.76923	24.3722	HSP90AB1;STAT1;SQSTM1
Norovirus Hu/Norwalk/20014/2009/VNM 3C-like protease (gene: POL)	3/25	0.0146325	0.107034	0	0	5.76923	24.3722	HSP90AB1;STAT1;SQSTM1
Norovirus Hu/Norwalk/20016/2009/VNM 3C-like protease (gene: POL)	3/25	0.0146325	0.106917	0	0	5.76923	24.3722	HSP90AB1;STAT1;SQSTM1
Norovirus Hu/Norwalk/20019/2009/VNM 3C-like protease (gene: POL)	3/25	0.0146325	0.106801	0	0	5.76923	24.3722	HSP90AB1;STAT1;SQSTM1
Norovirus Hu/Norwalk/20033/2009/VNM 3C-like protease (gene: POL)	3/25	0.0146325	0.106685	0	0	5.76923	24.3722	HSP90AB1;STAT1;SQSTM1
Norovirus Hu/Norwalk/20035/2009/VNM 3C-like protease (gene: POL)	3/25	0.0146325	0.10657	0	0	5.76923	24.3722	HSP90AB1;STAT1;SQSTM1
Norovirus Hu/Norwalk/20044/2009/VNM 3C-like protease (gene: POL)	3/25	0.0146325	0.106454	0	0	5.76923	24.3722	HSP90AB1;STAT1;SQSTM1
Norovirus Hu/Norwalk/20047/2009/VNM 3C-like protease (gene: POL)	3/25	0.0146325	0.106339	0	0	5.76923	24.3722	HSP90AB1;STAT1;SQSTM1
Norovirus Hu/Norwalk/20066/2009/VNM 3C-like protease (gene: POL)	3/25	0.0146325	0.106224	0	0	5.76923	24.3722	HSP90AB1;STAT1;SQSTM1
Norovirus Hu/Norwalk/20067/2009/VNM 3C-like protease (gene: POL)	3/25	0.0146325	0.106109	0	0	5.76923	24.3722	HSP90AB1;STAT1;SQSTM1
Norovirus Hu/Norwalk/20069/2009/VNM 3C-like protease (gene: POL)	3/25	0.0146325	0.105995	0	0	5.76923	24.3722	HSP90AB1;STAT1;SQSTM1
Norovirus Hu/Norwalk/20092/2009/VNM 3C-like protease (gene: POL)	3/25	0.0146325	0.10588	0	0	5.76923	24.3722	HSP90AB1;STAT1;SQSTM1
Norovirus Hu/Norwalk/20093/2009/VNM 3C-like protease (gene: POL)	3/25	0.0146325	0.105767	0	0	5.76923	24.3722	HSP90AB1;STAT1;SQSTM1
Norovirus Hu/Norwalk/20094/2009/VNM 3C-like protease (gene: POL)	3/25	0.0146325	0.105653	0	0	5.76923	24.3722	HSP90AB1;STAT1;SQSTM1
Norovirus Hu/Norwalk/20118/2009/VNM 3C-like protease (gene: POL)	3/25	0.0146325	0.105539	0	0	5.76923	24.3722	HSP90AB1;STAT1;SQSTM1
Norovirus Hu/Norwalk/20122/2009/VNM 3C-like protease (gene: POL)	3/25	0.0146325	0.105426	0	0	5.76923	24.3722	HSP90AB1;STAT1;SQSTM1
Norovirus Hu/Norwalk/20123/2009/VNM 3C-like protease (gene: POL)	3/25	0.0146325	0.105313	0	0	5.76923	24.3722	HSP90AB1;STAT1;SQSTM1
Norovirus Hu/Norwalk/20128/2009/VNM 3C-like protease (gene: POL)	3/25	0.0146325	0.1052	0	0	5.76923	24.3722	HSP90AB1;STAT1;SQSTM1
Norovirus Hu/Norwalk/20135/2009/VNM 3C-like protease (gene: POL)	3/25	0.0146325	0.105088	0	0	5.76923	24.3722	HSP90AB1;STAT1;SQSTM1
Norovirus Hu/Norwalk/20139/2009/VNM 3C-like protease (gene: POL)	3/25	0.0146325	0.104976	0	0	5.76923	24.3722	HSP90AB1;STAT1;SQSTM1
Norovirus Hu/Norwalk/20140/2009/VNM 3C-like protease (gene: POL)	3/25	0.0146325	0.104864	0	0	5.76923	24.3722	HSP90AB1;STAT1;SQSTM1
Norovirus Hu/Norwalk/20142/2009/VNM 3C-like protease (gene: POL)	3/25	0.0146325	0.104752	0	0	5.76923	24.3722	HSP90AB1;STAT1;SQSTM1
Norovirus Hu/Shanghai/SH312/2009/CHN VP1	3/25	0.0146325	0.10464	0	0	5.76923	24.3722	STAT1;UBC;SQSTM1
Rhinovirus C capsid protein VP3	3/25	0.0146325	0.104529	0	0	5.76923	24.3722	STAT1;FLNA;ICAM1
Yellow fever virus anchored core protein C	3/25	0.0146325	0.104418	0	0	5.76923	24.3722	HSPA8;HSPA5;UBC
Human betaherpesvirus 6B glycoprotein (gene: U85)	15/383	0.0147588	0.105207	0	0	1.88291	7.93819	HSP90AB1;HSPA5;VWF;STAT1;ISG15;PTPRF;ICAM1;VEGFA;PTPRB;UBB;UBC;CCL2;IGFBP7;RPS27A;SQSTM1
Human papillomavirus FA75/KI88-03 E7 protein (gene: E7)	4/46	0.0151339	0.107767	0	0	4.1806	17.5201	STAT1;GSTP1;UBC;SQSTM1
Norovirus Hu/GII/20477/2010/VNM capsid protein VP1 (gene: VP1)	4/46	0.0151339	0.107653	0	0	4.1806	17.5201	STAT1;UBC;FLNA;SQSTM1
Norovirus Hu/Norwalk/10148/2009/VNM protein p48 (gene: POL)	4/46	0.0151339	0.107539	0	0	4.1806	17.5201	HSP90AB1;HSPA5;STAT1;UBC
Norovirus Hu/Norwalk/10176/2009/VNM capsid protein VP1 (gene: VP1)	4/46	0.0151339	0.107425	0	0	4.1806	17.5201	HSPA5;STAT1;UBC;SQSTM1
Norovirus Hu/Norwalk/20118/2009/VNM protein p48 (gene: POL)	4/46	0.0151339	0.107312	0	0	4.1806	17.5201	HSP90AB1;HSPA5;STAT1;SQSTM1
Norovirus Hu/Norwalk/20140/2009/VNM protein p48 (gene: POL)	4/46	0.0151339	0.107199	0	0	4.1806	17.5201	HSP90AB1;HSPA5;STAT1;SQSTM1
Human immunodeficiency virus 1 Gag-Pol (gene: gag-pol)	7/125	0.0157234	0.111257	0	0	2.69231	11.1801	HSPA8;HSP90AB1;HSPA5;STAT1;UBC;RPL35;PPID
Papiine alphaherpesvirus 2 DNA replication origin-binding helicase (gene: UL9)	6/97	0.0158047	0.111714	0	0	2.97383	12.3338	HSPA8;DDX5;HSPA5;STAT1;UBC;DYNLL1
Hepatitis C virus subtype 2k/1b full_polyprotein 1..3010	5/71	0.0161242	0.113852	0	0	3.3857	13.9743	HSPA5;STAT1;UBC;HIST2H2AC;HIST1H2AB
Echovirus E13 VP3	4/47	0.0162772	0.114813	0	0	4.09165	16.8494	HSPA5;STAT1;FLNA;ICAM1
Echovirus E21 VP1	4/47	0.0162772	0.114692	0	0	4.09165	16.8494	STAT1;UBC;ICAM1;TAPBP
Human papillomavirus E2 (gene: E2)	4/47	0.0162772	0.114572	0	0	4.09165	16.8494	HSP90AB1;STAT1;RPS20;PABPC1
MW polyomavirus small T antigen	4/47	0.0162772	0.114452	0	0	4.09165	16.8494	HSPA8;HSPA5;STAT1;UBC
MX polyomavirus large T-antigen	4/47	0.0162772	0.114332	0	0	4.09165	16.8494	HSPA8;HSPA5;STAT1;UBC
Monkeypox virus Cu-Zn superoxide dismutase-like protein	4/47	0.0162772	0.114213	0	0	4.09165	16.8494	STAT1;UBC;MYH9;SOD1
Monkeypox virus Zaire-96-I-16 A46R (gene: A46R)	4/47	0.0162772	0.114094	0	0	4.09165	16.8494	STAT1;UBC;MYH9;SOD1
Norovirus Hu/GII.6/CHDC4073/1984/USA protein p48 (gene: POL)	4/47	0.0162772	0.113975	0	0	4.09165	16.8494	HSPA5;STAT1;UBC;SQSTM1
Norovirus Hu/Norwalk/10148/2009/VNM capsid protein VP1 (gene: VP1)	4/47	0.0162772	0.113856	0	0	4.09165	16.8494	HSPA5;STAT1;UBC;SQSTM1
Yaba monkey tumor virus 86R	4/47	0.0162772	0.113737	0	0	4.09165	16.8494	STAT1;UBC;MYH9;SQSTM1
Human adenovirus 16 DNA binding protein (gene: E2A)	3/26	0.0162908	0.113714	0	0	5.54734	22.8393	HSP90AB1;STAT1;UBC
Human adenovirus 46 DBP	3/26	0.0162908	0.113596	0	0	5.54734	22.8393	STAT1;UBC;HIST1H2AB
Human adenovirus 6 17 kDa protein	3/26	0.0162908	0.113478	0	0	5.54734	22.8393	HSP90AB1;STAT1;SQSTM1
Human cosavirus B VP1	3/26	0.0162908	0.11336	0	0	5.54734	22.8393	HSPA5;STAT1;ICAM1
Human enterovirus 94 VP1	3/26	0.0162908	0.113243	0	0	5.54734	22.8393	STAT1;UBC;ICAM1
Human papillomavirus 132 E1 (gene: E1)	3/26	0.0162908	0.113126	0	0	5.54734	22.8393	STAT1;UBC;SQSTM1
Human papillomavirus 135 transforming protein (gene: E7)	3/26	0.0162908	0.113009	0	0	5.54734	22.8393	STAT1;UBC;SQSTM1
Human papillomavirus type 115 early protein E1 (gene: E1)	3/26	0.0162908	0.112892	0	0	5.54734	22.8393	STAT1;UBC;SQSTM1
Human papillomavirus type 39 E7 (gene: E7)	3/26	0.0162908	0.112776	0	0	5.54734	22.8393	HSPA5;UBC;SQSTM1
Human papillomavirus type 54 transforming protein (gene: E7)	3/26	0.0162908	0.11266	0	0	5.54734	22.8393	STAT1;UBC;SQSTM1
Human parechovirus 6 2C	3/26	0.0162908	0.112544	0	0	5.54734	22.8393	STAT1;FTH1;UBC
Human rhinovirus A21 2C	3/26	0.0162908	0.112428	0	0	5.54734	22.8393	NFKBIA;STAT1;UBC
Human rhinovirus A23 1D (VP1)	3/26	0.0162908	0.112313	0	0	5.54734	22.8393	STAT1;UBC;ICAM1
Norovirus Hu/GII.4/NIHIC17.1/2012/USA 3C-like protease (gene: POL)	3/26	0.0162908	0.112197	0	0	5.54734	22.8393	HSP90AB1;STAT1;SQSTM1
Norovirus Hu/GII.4/NIHIC17.5/2012/USA 3C-like protease (gene: POL)	3/26	0.0162908	0.112082	0	0	5.54734	22.8393	HSP90AB1;STAT1;SQSTM1
Norovirus Hu/GII.4/NIHIC17.6/2012/USA 3C-like protease (gene: POL)	3/26	0.0162908	0.111968	0	0	5.54734	22.8393	HSP90AB1;STAT1;SQSTM1
Norovirus Hu/GII.4/NIHIC35/2013/USA 3C-like protease (gene: POL)	3/26	0.0162908	0.111853	0	0	5.54734	22.8393	HSP90AB1;STAT1;SQSTM1
Human alphaherpesvirus 3 tegument protein VP22 (gene: ORF9)	6/98	0.0165501	0.113518	0	0	2.94349	12.0723	HSPA8;STAT1;UBC;ISG15;RPS13;PPID
Human herpesvirus 3 strain Dumas Tegument protein VP22 (gene: ORF9)	6/98	0.0165501	0.113402	0	0	2.94349	12.0723	HSPA8;STAT1;UBC;ISG15;RPS13;PPID
Human betaherpesvirus 7 membrane glycoprotein UL119 (gene: U85)	16/425	0.016888	0.115599	0	0	1.80995	7.38671	CD274;HSP90AB1;VWF;STAT1;ISG15;PTPRF;ICAM1;VEGFA;PTPRB;UBB;UBC;FLNA;MYH9;IGFBP7;RPS27A;SQSTM1
Horsepox virus HSPV155 (IEV and EEV membrane glycoprotein; Provisional)	7/127	0.0170171	0.116365	0	0	2.64991	10.7945	THBD;HSP90AB1;HSPA5;STAT1;SFTPD;PABPC1;SFTPA1
Yaba-like disease virus 136R protein (gene: 136R)	7/127	0.0170171	0.116246	0	0	2.64991	10.7945	STAT1;UBC;MYH9;FLNA;SQSTM1;PTPRF;DCN
Human polyomavirus 6 large T antigen	5/72	0.0170408	0.11629	0	0	3.33868	13.5956	HSPA8;HSPA5;STAT1;UBC;SQSTM1
Human polyomavirus 9 large T antigen	5/72	0.0170408	0.116172	0	0	3.33868	13.5956	HSPA8;HSPA5;STAT1;HIST2H2AC;HIST1H2AB
Human polyomavirus IPPyV large T antigen protein (gene: large T antigen)	5/72	0.0170408	0.116054	0	0	3.33868	13.5956	HSPA8;HSPA5;STAT1;HIST2H2AC;HIST1H2AB
Human rhinovirus A11 full_polyprotein 1..2153	5/72	0.0170408	0.115936	0	0	3.33868	13.5956	HSPA5;STAT1;UBC;SQSTM1;ICAM1
West Nile virus lineage 1 envelope protein E (gene: flavivirus polyprotein)	5/72	0.0170408	0.115819	0	0	3.33868	13.5956	HSPA8;HSP90AB1;STAT1;UBC;PSME1
Human adenovirus 19 protease (gene: L3)	2/10	0.0173908	0.118078	0	0	9.61538	38.9597	STAT1;UBC
Human adenovirus 22 protease (gene: L3)	2/10	0.0173908	0.117959	0	0	9.61538	38.9597	STAT1;UBC
Human adenovirus 28 protease	2/10	0.0173908	0.11784	0	0	9.61538	38.9597	STAT1;UBC
Human adenovirus 36 protease	2/10	0.0173908	0.117721	0	0	9.61538	38.9597	STAT1;UBC
Human adenovirus 43 protease (gene: L3)	2/10	0.0173908	0.117603	0	0	9.61538	38.9597	STAT1;UBC
Human adenovirus 46 protease	2/10	0.0173908	0.117484	0	0	9.61538	38.9597	STAT1;UBC
Human adenovirus 49 proteinase	2/10	0.0173908	0.117366	0	0	9.61538	38.9597	STAT1;UBC
Human adenovirus 56 protease (gene: L3)	2/10	0.0173908	0.117248	0	0	9.61538	38.9597	STAT1;UBC
Human adenovirus 58 protease (gene: L3)	2/10	0.0173908	0.117131	0	0	9.61538	38.9597	STAT1;UBC
Human adenovirus 63 protease (gene: L3)	2/10	0.0173908	0.117013	0	0	9.61538	38.9597	STAT1;UBC
Human adenovirus 64 L3 protease	2/10	0.0173908	0.116896	0	0	9.61538	38.9597	STAT1;UBC
Human adenovirus 65 L3 protease	2/10	0.0173908	0.116779	0	0	9.61538	38.9597	STAT1;UBC
Human adenovirus 67 L3 protease	2/10	0.0173908	0.116663	0	0	9.61538	38.9597	STAT1;UBC
Human adenovirus 71 protease (gene: L3)	2/10	0.0173908	0.116546	0	0	9.61538	38.9597	STAT1;UBC
Human adenovirus Chiba_E086/2012 protease (gene: L3)	2/10	0.0173908	0.11643	0	0	9.61538	38.9597	STAT1;UBC
Human adenovirus D10 protease (gene: L3)	2/10	0.0173908	0.116314	0	0	9.61538	38.9597	STAT1;UBC
Human adenovirus D37 protease (gene: L3)	2/10	0.0173908	0.116198	0	0	9.61538	38.9597	STAT1;UBC
Human mastadenovirus D protease (gene: L3)	2/10	0.0173908	0.116083	0	0	9.61538	38.9597	STAT1;UBC
Human poliovirus 3 VP4	2/10	0.0173908	0.115968	0	0	9.61538	38.9597	STAT1;SQSTM1
Human polyomavirus 7 small T antigen	2/10	0.0173908	0.115853	0	0	9.61538	38.9597	HSPA8;STAT1
Monkeypox virus Zaire-96-I-16 hypothetical protein (gene: D2L)	2/10	0.0173908	0.115738	0	0	9.61538	38.9597	STAT1;UBC
New Jersey polyomavirus-2013 small T antigen	2/10	0.0173908	0.115623	0	0	9.61538	38.9597	HSPA8;STAT1
Variola virus hypothetical protein (gene: D1L)	2/10	0.0173908	0.115509	0	0	9.61538	38.9597	HSPA5;STAT1
Yellow fever virus matrix protein M	2/10	0.0173908	0.115395	0	0	9.61538	38.9597	STAT1;UBC
Human adenovirus 61 E3 CR1 beta	15/391	0.0174603	0.115741	0	0	1.84438	7.46575	CD274;VWF;STAT1;ISG15;PTPRF;ICAM1;VEGFA;UBB;UBC;LCN2;FLNA;COL6A3;IGFBP7;MFGE8;SQSTM1
Cowpox virus CrmD or CPXV221 protein (gene: CrmD)	4/48	0.0174733	0.115713	0	0	4.00641	16.2143	CCL7;STAT1;CCL5;CCL2
Human coronavirus HKU1 nsp3 (gene: orf1ab)	4/48	0.0174733	0.115599	0	0	4.00641	16.2143	STAT1;UBC;MYH9;SQSTM1
Human papillomavirus 111 E7 protein (gene: E7)	4/48	0.0174733	0.115485	0	0	4.00641	16.2143	STAT1;UBC;RPS20;SQSTM1
Human papillomavirus type 16 transforming protein (gene: E7)	4/48	0.0174733	0.115372	0	0	4.00641	16.2143	STAT1;GSTP1;UBC;SQSTM1
Norovirus Hu/GII.4/Jannali/NSW774M/2011/AU full_polyprotein 1..1699	4/48	0.0174733	0.115258	0	0	4.00641	16.2143	HSP90AB1;HSPA5;STAT1;SQSTM1
Norovirus Hu/GII/BG1C0204/2011/BGD capsid protein VP1 (gene: VP1)	4/48	0.0174733	0.115145	0	0	4.00641	16.2143	STAT1;UBC;FLNA;SQSTM1
Norovirus Hu/GII/BG1C0270/2011/BGD capsid protein VP1 (gene: VP1)	4/48	0.0174733	0.115032	0	0	4.00641	16.2143	STAT1;UBC;FLNA;SQSTM1
Norovirus Hu/GII/BG1C0317/2011/BGD capsid protein VP1 (gene: VP1)	4/48	0.0174733	0.11492	0	0	4.00641	16.2143	STAT1;UBC;FLNA;SQSTM1
Norovirus Hu/Norwalk/10074/2009/VNM protein p48 (gene: POL)	4/48	0.0174733	0.114807	0	0	4.00641	16.2143	HSP90AB1;HSPA5;STAT1;SQSTM1
Norovirus Hu/Norwalk/10296/2010/VNM protein p48 (gene: POL)	4/48	0.0174733	0.114695	0	0	4.00641	16.2143	HSP90AB1;HSPA5;STAT1;SQSTM1
Norovirus Hu/Norwalk/20094/2009/VNM capsid protein VP1 (gene: VP1)	4/48	0.0174733	0.114583	0	0	4.00641	16.2143	HSPA5;STAT1;UBC;SQSTM1
Pichinde mammarenavirus L polymerase (gene: L)	4/48	0.0174733	0.114471	0	0	4.00641	16.2143	HSPA8;HSPA5;STAT1;UBC
Yellow fever virus non-structural protein NS3	4/48	0.0174733	0.11436	0	0	4.00641	16.2143	STAT1;APLP2;COL6A3;SQSTM1
Cercopithecine alphaherpesvirus 2 DNA replication origin-binding helicase (gene: UL9)	5/73	0.0179914	0.117636	0	0	3.29294	13.2306	DDX17;HSPA8;DDX5;STAT1;DYNLL1
Vaccinia virus hypothetical protein (gene: C5L)	5/73	0.0179914	0.117521	0	0	3.29294	13.2306	LGALS3BP;HSPA8;HSPA5;STAT1;UBC
Cowpox virus CPXV014 protein (gene: CPXV014 CDS)	3/27	0.0180501	0.117791	0	0	5.34188	21.4455	STAT1;CCL5;CCL2
Coxsackievirus A11 vp1	3/27	0.0180501	0.117676	0	0	5.34188	21.4455	STAT1;FLNA;ICAM1
Dengue virus 4 membrane glycoprotein M (gene: flavivirus polyprotein)	3/27	0.0180501	0.117562	0	0	5.34188	21.4455	HSPA8;HSPA5;UBC
Human TMEV-like cardiovirus capsid protein VP1	3/27	0.0180501	0.117448	0	0	5.34188	21.4455	HSPA5;STAT1;SQSTM1
Human adenovirus 41 VI	3/27	0.0180501	0.117334	0	0	5.34188	21.4455	HSPA8;HSPA5;UBC
Human adenovirus D8 7.3kDa protein (gene: E4)	3/27	0.0180501	0.117221	0	0	5.34188	21.4455	HSPA5;STAT1;UBC
Human papillomavirus 121 transforming protein E7 (gene: E7)	3/27	0.0180501	0.117108	0	0	5.34188	21.4455	STAT1;UBC;SQSTM1
Human papillomavirus 133 E7 (gene: E7)	3/27	0.0180501	0.116995	0	0	5.34188	21.4455	STAT1;UBC;SQSTM1
Human papillomavirus 146 replication protein (gene: E1)	3/27	0.0180501	0.116882	0	0	5.34188	21.4455	STAT1;UBC;SQSTM1
Human papillomavirus type 112 E1 protein (gene: E1)	3/27	0.0180501	0.116769	0	0	5.34188	21.4455	STAT1;UBC;SQSTM1
Human rhinovirus A49 1D	3/27	0.0180501	0.116657	0	0	5.34188	21.4455	STAT1;UBC;ICAM1
Human rhinovirus A71 1D	3/27	0.0180501	0.116545	0	0	5.34188	21.4455	HSPA5;STAT1;ICAM1
Human rhinovirus A75 1D (VP1)	3/27	0.0180501	0.116433	0	0	5.34188	21.4455	STAT1;UBC;ICAM1
Lassa mammarenavirus Z protein	3/27	0.0180501	0.116321	0	0	5.34188	21.4455	STAT1;GSTA3;GSTP1
Molluscum contagiosum virus subtype 1 MC079R (gene: MC079R)	3/27	0.0180501	0.116209	0	0	5.34188	21.4455	STAT1;UBC;SQSTM1
Norovirus Hu/GII.4/NIHIC11.3/2013/USA 3C-like protease (gene: POL)	3/27	0.0180501	0.116098	0	0	5.34188	21.4455	HSP90AB1;STAT1;SQSTM1
Ectromelia virus ERPV cd47-like protein	4/49	0.0187227	0.120309	0	0	3.92465	15.6123	HSPA5;STAT1;UBC;CD47
Enterovirus B97 VP1	4/49	0.0187227	0.120194	0	0	3.92465	15.6123	STAT1;UBC;ICAM1;TAPBP
Human adenovirus 61 E4 ORF1	4/49	0.0187227	0.120079	0	0	3.92465	15.6123	HSP90AB1;STAT1;UBC;SQSTM1
Japanese encephalitis virus envelope protein	4/49	0.0187227	0.119965	0	0	3.92465	15.6123	HSPA8;HSP90AB1;HSPA5;STAT1
Monkeypox virus Zaire-96-I-16 E10R (gene: E10R)	4/49	0.0187227	0.11985	0	0	3.92465	15.6123	HSPA5;STAT1;UBC;SQSTM1
Norovirus Hu/Norwalk/10137/2009/VNM capsid protein VP1 (gene: VP1)	4/49	0.0187227	0.119736	0	0	3.92465	15.6123	HSPA5;STAT1;UBC;SQSTM1
Norovirus Hu/Norwalk/10223/2009/VNM capsid protein VP1 (gene: VP1)	4/49	0.0187227	0.119622	0	0	3.92465	15.6123	HSPA5;STAT1;UBC;SQSTM1
Norovirus Hu/Norwalk/20044/2009/VNM capsid protein VP1 (gene: VP1)	4/49	0.0187227	0.119509	0	0	3.92465	15.6123	HSPA5;STAT1;UBC;SQSTM1
Echovirus E18 full_polyprotein 1..2189	6/101	0.0189312	0.120724	0	0	2.85605	11.3298	C3;STAT1;UBC;SQSTM1;CFB;ICAM1
Echovirus E9 full_polyprotein 1..2203	7/130	0.0190959	0.12166	0	0	2.58876	10.247	C3;STAT1;UBC;HP;SQSTM1;CFB;ICAM1
Human rhinovirus B37 full_polyprotein 1..2178	6/102	0.0197742	0.125861	0	0	2.82805	11.0955	HSPA5;STAT1;UBC;DYNLL1;SQSTM1;ICAM1
Orf virus ORF020 dsRNA-binding PKR inhibitor	6/102	0.0197742	0.125742	0	0	2.82805	11.0955	EEF1A1;HSPA8;HSP90AB1;HSPA5;UBC;SQSTM1
Variola virus IEV and EEV membrane glycoprotein (gene: A37R)	7/131	0.0198267	0.125957	0	0	2.569	10.0723	THBD;CD93;HSPA5;STAT1;SFTPD;PABPC1;SFTPA1
Cercopithecine betaherpesvirus 5 membrane protein US27D (gene: US27D)	3/28	0.0199109	0.126372	0	0	5.1511	20.1742	HSPA8;STAT1;UBC
Human adenovirus 12 early E2A DNA-binding protein	3/28	0.0199109	0.126253	0	0	5.1511	20.1742	HSP90AB1;STAT1;UBC
Human adenovirus 43 DNA binding protein (gene: E2A)	3/28	0.0199109	0.126134	0	0	5.1511	20.1742	STAT1;UBC;HIST1H2AB
Human alphaherpesvirus 2 tegument host shutoff protein (gene: UL41)	3/28	0.0199109	0.126015	0	0	5.1511	20.1742	HSPA8;HSPA5;STAT1
Human mastadenovirus A DBP	3/28	0.0199109	0.125896	0	0	5.1511	20.1742	HSP90AB1;STAT1;UBC
Human papillomavirus 100 E1 protein (gene: E1)	3/28	0.0199109	0.125778	0	0	5.1511	20.1742	STAT1;UBC;SQSTM1
Human papillomavirus 110 E7 protein (gene: E7)	3/28	0.0199109	0.125659	0	0	5.1511	20.1742	STAT1;UBC;SQSTM1
Human papillomavirus 141 replication protein (gene: E1)	3/28	0.0199109	0.125541	0	0	5.1511	20.1742	STAT1;UBC;SQSTM1
Human papillomavirus 151 putative E7 product (gene: E7)	3/28	0.0199109	0.125424	0	0	5.1511	20.1742	STAT1;UBC;SQSTM1
Human papillomavirus type 7 early protein (gene: E1)	3/28	0.0199109	0.125306	0	0	5.1511	20.1742	STAT1;UBC;SQSTM1
Human parechovirus 6 capsid protein VP0	3/28	0.0199109	0.125189	0	0	5.1511	20.1742	STAT1;UBC;ISG15
Human poliovirus 3 P2-X	3/28	0.0199109	0.125072	0	0	5.1511	20.1742	ATP5B;STAT1;UBC
Human rhinovirus A7 1D	3/28	0.0199109	0.124955	0	0	5.1511	20.1742	HSPA5;STAT1;ICAM1
Middle East respiratory syndrome-related coronavirus nsp8 protein (gene: orf1ab)	3/28	0.0199109	0.124838	0	0	5.1511	20.1742	UBB;STAT1;ISG15
Monkeypox virus CD47-like putative membrane protein	3/28	0.0199109	0.124722	0	0	5.1511	20.1742	HSPA5;STAT1;CD47
Monkeypox virus Zaire-96-I-16 A40L (gene: A40L)	3/28	0.0199109	0.124605	0	0	5.1511	20.1742	HSPA5;STAT1;CD47
Norovirus Hu/GII.2/HS255/2011/USA 3C-like protease (gene: POL)	3/28	0.0199109	0.124489	0	0	5.1511	20.1742	HSP90AB1;STAT1;SQSTM1
Yaba-like disease virus 84R protein (gene: 84R)	3/28	0.0199109	0.124374	0	0	5.1511	20.1742	HSPA8;STAT1;UBC
Human cosavirus full_polyprotein 1..2121	5/75	0.019996	0.124789	0	0	3.20513	12.5392	ATP5B;STAT1;FLNA;CFB;ICAM1
Echovirus E29 VP2	4/50	0.0200261	0.124861	0	0	3.84615	15.0412	STAT1;CFB;ICAM1;TAPBP
Hepatitis B virus pre-capsid protein (gene: C)	4/50	0.0200261	0.124745	0	0	3.84615	15.0412	HSPA8;HSPA5;STAT1;UBC
Horsepox virus HSPV153 (Poxvirus A32 protein)	4/50	0.0200261	0.12463	0	0	3.84615	15.0412	NFKBIA;STAT1;UBC;SQSTM1
Norovirus Hu/Norwalk/10313/2010/VNM protein p48 (gene: POL)	4/50	0.0200261	0.124514	0	0	3.84615	15.0412	HSP90AB1;HSPA5;STAT1;SQSTM1
Norovirus Hu/Norwalk/10378/2010/VNM protein p48 (gene: POL)	4/50	0.0200261	0.124399	0	0	3.84615	15.0412	HSP90AB1;HSPA5;STAT1;SQSTM1
Vaccinia virus Ankara intermediate gene transcription factor VITF-1	4/50	0.0200261	0.124284	0	0	3.84615	15.0412	HSP90AB1;HSPA5;STAT1;SQSTM1
Variola virus hypothetical protein (gene: B12R)	4/50	0.0200261	0.12417	0	0	3.84615	15.0412	HSPA8;HSPA5;STAT1;UBC
Monkeypox virus Zaire-96-I-16 IEV and EEV membrane glycoprotein (gene: A36R)	7/132	0.0205768	0.127466	0	0	2.54953	9.90135	CXCL9;CD93;HSPA5;STAT1;SFTPD;PABPC1;SFTPA1
Cercopithecine betaherpesvirus 5 membrane protein US20 (gene: US20)	2/11	0.0209662	0.129758	0	0	8.74126	33.7836	STAT1;UBC
Human adenovirus 16 23 kDa protease (gene: L3)	2/11	0.0209662	0.129639	0	0	8.74126	33.7836	STAT1;UBC
Human adenovirus 21 23 kDa proteinase (gene: L3)	2/11	0.0209662	0.12952	0	0	8.74126	33.7836	STAT1;UBC
Human adenovirus 21a 23 kDa proteinase (gene: L3)	2/11	0.0209662	0.129401	0	0	8.74126	33.7836	STAT1;UBC
Human adenovirus 3+7 23 kDa protease (gene: L3)	2/11	0.0209662	0.129282	0	0	8.74126	33.7836	STAT1;UBC
Human adenovirus 50 23 kDa protein (gene: L3)	2/11	0.0209662	0.129163	0	0	8.74126	33.7836	STAT1;UBC
Human adenovirus 54 protease	2/11	0.0209662	0.129045	0	0	8.74126	33.7836	STAT1;UBC
Human adenovirus 66 23 kDa protease (gene: L3)	2/11	0.0209662	0.128927	0	0	8.74126	33.7836	STAT1;UBC
Human adenovirus 68 23 kDa protease (gene: L3)	2/11	0.0209662	0.128809	0	0	8.74126	33.7836	STAT1;UBC
Human adenovirus 7 protease	2/11	0.0209662	0.128691	0	0	8.74126	33.7836	STAT1;UBC
Human adenovirus 7d2 23 kDa protease (gene: L3)	2/11	0.0209662	0.128573	0	0	8.74126	33.7836	STAT1;UBC
Human adenovirus B3 L3 23-kDa protein (protease) (gene: L3)	2/11	0.0209662	0.128456	0	0	8.74126	33.7836	STAT1;UBC
Human adenovirus D8 protease (gene: L3)	2/11	0.0209662	0.128339	0	0	8.74126	33.7836	STAT1;UBC
Human coronavirus HKU1 nsp9 (gene: orf1ab)	2/11	0.0209662	0.128222	0	0	8.74126	33.7836	HSPA5;STAT1
Human papillomavirus type 59 ORF putative E6	2/11	0.0209662	0.128105	0	0	8.74126	33.7836	STAT1;UBC
Lyssavirus Ozernoe phosphoprotein (gene: P)	2/11	0.0209662	0.127989	0	0	8.74126	33.7836	STAT1;DYNLL1
Norovirus GI Pro	2/11	0.0209662	0.127873	0	0	8.74126	33.7836	HSP90AB1;STAT1
Norovirus GI VPg	2/11	0.0209662	0.127757	0	0	8.74126	33.7836	STAT1;UBC
Norovirus Hu/GI.1/8CKIIIc/1974/USA 3C-like protease (gene: POL)	2/11	0.0209662	0.127641	0	0	8.74126	33.7836	HSP90AB1;STAT1
Norovirus Hu/GI.1/8CKIIIc/1974/USA viral genome-linked protein (gene: POL)	2/11	0.0209662	0.127525	0	0	8.74126	33.7836	STAT1;UBC
Norovirus Hu/GI.1/8FIIa/1968/USA 3C-like protease (gene: POL)	2/11	0.0209662	0.12741	0	0	8.74126	33.7836	HSP90AB1;STAT1
Norovirus Hu/GI.1/8FIIa/1968/USA viral genome-linked protein (gene: POL)	2/11	0.0209662	0.127295	0	0	8.74126	33.7836	STAT1;UBC
Norovirus Hu/GI.1/8K/1979/USA viral genome-linked protein (gene: POL)	2/11	0.0209662	0.12718	0	0	8.74126	33.7836	STAT1;UBC
Norovirus Hu/GI.1/8K/1979/USA 3C-like protease (gene: POL)	2/11	0.0209662	0.127065	0	0	8.74126	33.7836	HSP90AB1;STAT1
Norovirus Hu/GI.1/8MC/1978/USA viral genome-linked protein (gene: POL)	2/11	0.0209662	0.12695	0	0	8.74126	33.7836	STAT1;UBC
Norovirus Hu/GI.1/8MC/1978/USA 3C-like protease (gene: POL)	2/11	0.0209662	0.126836	0	0	8.74126	33.7836	HSP90AB1;STAT1
Norovirus Hu/GI.1/8McIII/1973/USA viral genome-linked protein (gene: POL)	2/11	0.0209662	0.126722	0	0	8.74126	33.7836	STAT1;UBC
Norovirus Hu/GI.1/8McIII/1973/USA 3C-like protease (gene: POL)	2/11	0.0209662	0.126608	0	0	8.74126	33.7836	HSP90AB1;STAT1
Norovirus Hu/GI.1/8MoIIIL/1972/USA viral genome-linked protein (gene: POL)	2/11	0.0209662	0.126494	0	0	8.74126	33.7836	STAT1;UBC
Norovirus Hu/GI.1/8MoIIIL/1972/USA 3C-like protease (gene: POL)	2/11	0.0209662	0.12638	0	0	8.74126	33.7836	HSP90AB1;STAT1
Norovirus Hu/GI.1/8UIIIf/1973/USA viral genome-linked protein (gene: POL)	2/11	0.0209662	0.126267	0	0	8.74126	33.7836	STAT1;UBC
Norovirus Hu/GI.1/8UIIIf/1973/USA 3C-like protease (gene: POL)	2/11	0.0209662	0.126154	0	0	8.74126	33.7836	HSP90AB1;STAT1
Norovirus Hu/GI.1/8W/1968/USA 3C-like protease (gene: POL)	2/11	0.0209662	0.126041	0	0	8.74126	33.7836	HSP90AB1;STAT1
Norovirus Hu/GI.1/8W/1968/USA viral genome-linked protein (gene: POL)	2/11	0.0209662	0.125928	0	0	8.74126	33.7836	STAT1;UBC
Human adenovirus 3+7 maturation protein IVA2 (gene: IVa2)	5/76	0.021051	0.126325	0	0	3.16296	12.2116	UBB;HSPA5;STAT1;UBC;ISG15
Murray Valley encephalitis virus envelope protein E	5/76	0.021051	0.126212	0	0	3.16296	12.2116	HSPA8;HSP90AB1;STAT1;PSME1;RPL13
Echovirus E20 VP2	4/51	0.0213841	0.128095	0	0	3.77074	14.4989	STAT1;CFB;ICAM1;TAPBP
Echovirus E31 VP1	4/51	0.0213841	0.127981	0	0	3.77074	14.4989	STAT1;UBC;ICAM1;TAPBP
Human betaherpesvirus 6 U12, GCR (gene: U12)	4/51	0.0213841	0.127867	0	0	3.77074	14.4989	HSPA8;HSPA5;STAT1;UBC
Human gammaherpesvirus 4 hypothetical BALF1 protein (gene: BALF1)	4/51	0.0213841	0.127753	0	0	3.77074	14.4989	HSPA5;STAT1;SQSTM1;MCL1
Molluscum contagiosum virus subtype 1 MC095R (gene: MC095R)	4/51	0.0213841	0.12764	0	0	3.77074	14.4989	HSPA8;DDX5;HSPA5;STAT1
Norovirus Hu/GII/20469/2010/VNM protein p48 (gene: POL)	4/51	0.0213841	0.127526	0	0	3.77074	14.4989	HSP90AB1;HSPA5;STAT1;SQSTM1
Norovirus Hu/GII/Seoul1072/KOR/2010 nonstructural protein	4/51	0.0213841	0.127413	0	0	3.77074	14.4989	HSP90AB1;HSPA5;STAT1;SQSTM1
Norovirus Hu/Norwalk/10162/2009/VNM capsid protein VP1 (gene: VP1)	4/51	0.0213841	0.1273	0	0	3.77074	14.4989	STAT1;UBC;FLNA;SQSTM1
Norovirus Hu/Norwalk/10173/2009/VNM capsid protein VP1 (gene: VP1)	4/51	0.0213841	0.127187	0	0	3.77074	14.4989	STAT1;UBC;FLNA;SQSTM1
Norovirus Hu/Norwalk/20016/2009/VNM capsid protein VP1 (gene: VP1)	4/51	0.0213841	0.127075	0	0	3.77074	14.4989	STAT1;UBC;FLNA;SQSTM1
Norovirus Hu/Norwalk/20035/2009/VNM capsid protein VP1 (gene: VP1)	4/51	0.0213841	0.126962	0	0	3.77074	14.4989	STAT1;UBC;FLNA;SQSTM1
Orf virus ORF069 early transcription factor VETFs	4/51	0.0213841	0.12685	0	0	3.77074	14.4989	DDX17;HSPA8;DDX5;PABPC1
Vaccinia virus Ankara soluble TNF receptor II precursor f1	4/51	0.0213841	0.126738	0	0	3.77074	14.4989	STAT1;CCL5;DYNLL1;SQSTM1
WU Polyomavirus large T antigen	4/51	0.0213841	0.126627	0	0	3.77074	14.4989	HSPA8;HSPA5;STAT1;UBC
Chandipura virus phosphoprotein	3/29	0.0218734	0.12941	0	0	4.97347	19.011	STAT1;UBC;SQSTM1
Cowpox virus CPXV126 protein (gene: CPXV126 CDS)	3/29	0.0218734	0.129296	0	0	4.97347	19.011	STAT1;UBC;SQSTM1
Human adenovirus 49 DNA Binding Protein	3/29	0.0218734	0.129182	0	0	4.97347	19.011	STAT1;UBC;HIST1H2AB
Human cosavirus D VP2	3/29	0.0218734	0.129068	0	0	4.97347	19.011	HSPA5;STAT1;ICAM1
Human papillomavirus type 60 replication protein E1 (gene: E1)	3/29	0.0218734	0.128955	0	0	4.97347	19.011	STAT1;UBC;SQSTM1
Human rhinovirus A43 1D	3/29	0.0218734	0.128842	0	0	4.97347	19.011	STAT1;UBC;ICAM1
Human rhinovirus A44 2C (P2-C)	3/29	0.0218734	0.128729	0	0	4.97347	19.011	NFKBIA;ATP5B;STAT1
Human rhinovirus A66 1D	3/29	0.0218734	0.128616	0	0	4.97347	19.011	HSPA5;STAT1;ICAM1
Human rhinovirus A77 1D	3/29	0.0218734	0.128504	0	0	4.97347	19.011	STAT1;UBC;ICAM1
Norovirus GII/Hu/JP/2007/GII.P15_GII.15/Sapporo/HK299 VP1 (gene: VP1)	3/29	0.0218734	0.128391	0	0	4.97347	19.011	HSPA5;STAT1;SQSTM1
Norovirus GIV Pro	3/29	0.0218734	0.128279	0	0	4.97347	19.011	HSP90AB1;STAT1;SQSTM1
Norovirus Hu/GII.3/Jingzhou/2013402/CHN major capsid protein VP1	3/29	0.0218734	0.128167	0	0	4.97347	19.011	STAT1;UBC;SQSTM1
Sudan ebolavirus minor nucleoprotein (gene: VP30)	3/29	0.0218734	0.128056	0	0	4.97347	19.011	HSPA8;STAT1;UBC
Sudan ebolavirus - Nakisamata minor nucleoprotein (gene: VP30)	3/29	0.0218734	0.127944	0	0	4.97347	19.011	HSPA8;STAT1;UBC
Vaccinia virus contains mutT-like motif of NTP-phosphohydrolase for DNA repair (gene: D9R)	3/29	0.0218734	0.127833	0	0	4.97347	19.011	STAT1;UBC;SQSTM1
Cercopithecine betaherpesvirus 5 tegument protein UL37 (gene: UL47)	10/229	0.0220279	0.128624	0	0	2.09943	8.01026	HSPA8;HSPA5;STAT1;FTH1;UBC;NMI;PABPC1;IFIT3;HIST2H2AC;HIST1H2AB
Ectromelia virus ERPV EEV c-type lectin-like protein	7/134	0.0221358	0.129142	0	0	2.51148	9.57014	THBD;CXCL9;HSPA5;STAT1;SFTPD;PABPC1;SFTPA1
Monkeypox virus EEV glycoprotein	7/134	0.0221358	0.12903	0	0	2.51148	9.57014	CXCL9;HSPA5;VWF;STAT1;SFTPD;PABPC1;SFTPA1
Orf virus ORF132 vascular endothelial growth factor-like protein	7/134	0.0221358	0.128918	0	0	2.51148	9.57014	HSPA8;HSPA5;VWF;STAT1;UBC;CD47;VEGFA
Human papillomavirus 15 early protein (gene: E2)	5/77	0.0221416	0.128839	0	0	3.12188	11.8953	EEF1G;STAT1;RPL23;RPS20;DYNLL1
Echovirus E12 polyprotein	6/105	0.0224555	0.130553	0	0	2.74725	10.4292	STAT1;UBC;SQSTM1;CFB;ICAM1;TAPBP
Sosuga virus phosphoprotein	6/105	0.0224555	0.13044	0	0	2.74725	10.4292	HSPA8;HSPA5;STAT1;UBC;HIST1H2AB;HIST2H2AC
Echovirus E26 VP2	4/52	0.0227972	0.132311	0	0	3.69822	13.9834	STAT1;CFB;ICAM1;TAPBP
Echovirus E3 VP1	4/52	0.0227972	0.132196	0	0	3.69822	13.9834	STAT1;UBC;ICAM1;TAPBP
Echovirus E33 VP2	4/52	0.0227972	0.132082	0	0	3.69822	13.9834	STAT1;CFB;ICAM1;TAPBP
Echovirus E4 VP2	4/52	0.0227972	0.131968	0	0	3.69822	13.9834	STAT1;CFB;ICAM1;TAPBP
HBV genotype D HBeAg (gene: PreC/C)	4/52	0.0227972	0.131855	0	0	3.69822	13.9834	HSPA8;HSPA5;STAT1;UBC
Human adenovirus D8 pIVa2 protein (gene: pIVa2)	4/52	0.0227972	0.131741	0	0	3.69822	13.9834	ATP5B;STAT1;UBC;SQSTM1
Human herpesvirus 4 type 2 BALF1	4/52	0.0227972	0.131628	0	0	3.69822	13.9834	HSPA5;STAT1;SQSTM1;MCL1
Norovirus GII/Hu/JP/2010/GII.P4_GII.4/Shimada/ASC96 VP1 (gene: VP1)	4/52	0.0227972	0.131515	0	0	3.69822	13.9834	LGALS1;STAT1;UBC;SQSTM1
Norovirus Hu/GII-4/CBNU2/2007/KR capsid protein	4/52	0.0227972	0.131402	0	0	3.69822	13.9834	LGALS1;STAT1;UBC;SQSTM1
Norovirus Hu/GII.4/GZ2010-L26/Guangzhou/CHN/2010 full_polyprotein 1..1699	4/52	0.0227972	0.131289	0	0	3.69822	13.9834	HSP90AB1;HSPA5;STAT1;SQSTM1
Norovirus Hu/Norwalk/10328/2010/VNM protein p48 (gene: POL)	4/52	0.0227972	0.131177	0	0	3.69822	13.9834	HSP90AB1;HSPA5;STAT1;SQSTM1
Influenza A virus (A/Puerto Rico/8/1934(H1N1)) haemagglutinin (gene: HA)	5/78	0.0232682	0.133772	0	0	3.08185	11.5898	CD274;TPM4;STAT1;GBP2;GBP4
Orf virus ORF036 RNA helicase NPH-II	6/106	0.0234011	0.134421	0	0	2.72134	10.2185	DDX17;HSPA8;DDX5;STAT1;UBC;PABPC1
Molluscum contagiosum virus subtype 1 MC143R (gene: MC143R)	7/136	0.0237748	0.136451	0	0	2.47455	9.25265	HSP90AB1;CD93;HSPA5;VWF;STAT1;SFTPD;SFTPA1
Vaccinia virus ser/thr protein kinase-like protein (gene: B12R)	8/167	0.0238222	0.136606	0	0	2.30309	8.60695	HSPA8;HSPA5;STAT1;PRDX1;UBC;RPS2;SQSTM1;SOD1
Coxsackievirus A12 VP2 protein	3/30	0.0239377	0.137151	0	0	4.80769	17.9438	STAT1;FLNA;TAPBP
Human adenovirus 36 DBP	3/30	0.0239377	0.137034	0	0	4.80769	17.9438	STAT1;UBC;HIST1H2AB
Human alphaherpesvirus 1 tegument host shutoff protein (gene: UL41)	3/30	0.0239377	0.136918	0	0	4.80769	17.9438	HSPA8;HSPA5;STAT1
Human papillomavirus 110 E1 protein (gene: E1)	3/30	0.0239377	0.136801	0	0	4.80769	17.9438	STAT1;UBC;SQSTM1
Human papillomavirus 123 replication protein E1 (gene: E1)	3/30	0.0239377	0.136685	0	0	4.80769	17.9438	STAT1;UBC;SQSTM1
Human papillomavirus 151 putative E1 product (gene: E1)	3/30	0.0239377	0.136569	0	0	4.80769	17.9438	STAT1;UBC;SQSTM1
Human papillomavirus type 119 replication protein E1 (gene: E1)	3/30	0.0239377	0.136453	0	0	4.80769	17.9438	STAT1;UBC;SQSTM1
Human rhinovirus A18 1D	3/30	0.0239377	0.136337	0	0	4.80769	17.9438	STAT1;UBC;ICAM1
Human rhinovirus A51 1D	3/30	0.0239377	0.136221	0	0	4.80769	17.9438	STAT1;UBC;ICAM1
Human rhinovirus A53 1D (VP1)	3/30	0.0239377	0.136106	0	0	4.80769	17.9438	HSPA5;STAT1;ICAM1
Human rhinovirus A60 1D	3/30	0.0239377	0.135991	0	0	4.80769	17.9438	HSPA5;STAT1;ICAM1
Human rhinovirus A64 1D	3/30	0.0239377	0.135876	0	0	4.80769	17.9438	HSPA5;STAT1;ICAM1
Human rhinovirus A65 1D	3/30	0.0239377	0.135761	0	0	4.80769	17.9438	STAT1;UBC;ICAM1
Human rhinovirus A96 1C	3/30	0.0239377	0.135647	0	0	4.80769	17.9438	STAT1;FLNA;ICAM1
Influenza A virus (A/California/04/2009(H1N1)) matrix protein 2 (gene: M2)	3/30	0.0239377	0.135532	0	0	4.80769	17.9438	STAT1;UBC;APOE
Norovirus Hu/GII.3/CBNU1/2006/KOR capsid protein	3/30	0.0239377	0.135418	0	0	4.80769	17.9438	STAT1;UBC;SQSTM1
Variola virus hypothetical protein (gene: A43R)	3/30	0.0239377	0.135304	0	0	4.80769	17.9438	STAT1;UBC;SQSTM1
Echovirus E14 VP2	4/53	0.0242658	0.137044	0	0	3.62845	13.4931	STAT1;CFB;ICAM1;TAPBP
Echovirus E21 VP2	4/53	0.0242658	0.136929	0	0	3.62845	13.4931	STAT1;CFB;ICAM1;TAPBP
Echovirus E24 VP2	4/53	0.0242658	0.136814	0	0	3.62845	13.4931	STAT1;CFB;ICAM1;TAPBP
Echovirus E24 VP1	4/53	0.0242658	0.136699	0	0	3.62845	13.4931	STAT1;UBC;ICAM1;TAPBP
Echovirus E27 VP2	4/53	0.0242658	0.136584	0	0	3.62845	13.4931	STAT1;CFB;ICAM1;TAPBP
Echovirus E29 VP1	4/53	0.0242658	0.13647	0	0	3.62845	13.4931	STAT1;UBC;ICAM1;TAPBP
Echovirus E33 VP1	4/53	0.0242658	0.136356	0	0	3.62845	13.4931	STAT1;UBC;ICAM1;TAPBP
Influenza A virus (A/Shanghai/02/2013(H7N9)) hemagglutinin (gene: HA)	4/53	0.0242658	0.136242	0	0	3.62845	13.4931	TPM4;STAT1;UBC;PABPC1
Norovirus Hu/GII-4/CGMH13/2007/TW major viral capsid protein (gene: VP1)	4/53	0.0242658	0.136128	0	0	3.62845	13.4931	LGALS1;STAT1;UBC;SQSTM1
Vaccinia virus Ankara sulfhydryl oxidase	4/53	0.0242658	0.136014	0	0	3.62845	13.4931	ATP5B;HSPA5;STAT1;UBC
Yaba monkey tumor virus RNA polymerase subunit	4/53	0.0242658	0.135901	0	0	3.62845	13.4931	HSP90AB1;HSPA5;STAT1;UBC
Yaba-like disease virus 40R protein (gene: 40R)	4/53	0.0242658	0.135788	0	0	3.62845	13.4931	HSPA5;STAT1;UBC;RPL13
Yaba-like disease virus 128L protein (gene: 128L)	4/53	0.0242658	0.135675	0	0	3.62845	13.4931	PTPRB;STAT1;UBC;MYH9
Ectromelia virus ERPV hydroxysteroid dehydrogenase	6/107	0.024373	0.13616	0	0	2.6959	10.0133	TPM4;HPGD;STAT1;FASN;UBC;RPL35
Orf virus ORF095 DNA helicase	5/79	0.0244312	0.136372	0	0	3.04284	11.2947	DDX17;HSPA8;DDX5;UBC;PABPC1
Guanarito mammarenavirus L protein	7/137	0.0246248	0.137339	0	0	2.45649	9.09882	HSPA8;HSPA5;STAT1;UBC;RPL35;HIST1H2AB;HIST2H2AC
Aichi virus 1 VP1	2/12	0.0248176	0.138299	0	0	8.01282	29.617	STAT1;UBC
Human betaherpesvirus 6B Uracyl-DNA glycosylase (gene: U81)	2/12	0.0248176	0.138184	0	0	8.01282	29.617	RPS20;RPS2
Human orthopneumovirus matrix protein 2 (gene: M2)	2/12	0.0248176	0.13807	0	0	8.01282	29.617	STAT1;UBC
Human parechovirus 4 VP1	2/12	0.0248176	0.137955	0	0	8.01282	29.617	HSPA5;STAT1
Human polyomavirus 12 VP1 (gene: VP1)	2/12	0.0248176	0.137841	0	0	8.01282	29.617	HSPA5;STAT1
New Jersey polyomavirus-2013 VP1 (gene: VP1)	2/12	0.0248176	0.137727	0	0	8.01282	29.617	HSPA5;STAT1
Norovirus GI/Hu/JP/2007/GI.P3_GI.3/Shimizu/KK2866 VP1 (gene: VP1)	2/12	0.0248176	0.137614	0	0	8.01282	29.617	HSPA5;STAT1
Vaccinia virus TNF-alpha-receptor-like protein	2/12	0.0248176	0.1375	0	0	8.01282	29.617	STAT1;SQSTM1
Variola virus hypothetical protein (gene: O3L)	2/12	0.0248176	0.137387	0	0	8.01282	29.617	HSPA8;UBC
Yaba-like disease virus 4L protein (gene: 4L)	2/12	0.0248176	0.137274	0	0	8.01282	29.617	HSPA5;STAT1
Echovirus E20 VP1	4/54	0.0257904	0.142537	0	0	3.56125	13.0262	STAT1;UBC;ICAM1;TAPBP
Echovirus E25 VP2	4/54	0.0257904	0.14242	0	0	3.56125	13.0262	STAT1;CFB;ICAM1;TAPBP
Echovirus E6 VP2	4/54	0.0257904	0.142303	0	0	3.56125	13.0262	STAT1;CFB;ICAM1;TAPBP
HBV genotype H PC/C protein (gene: PC/C)	4/54	0.0257904	0.142186	0	0	3.56125	13.0262	HSPA8;HSPA5;STAT1;UBC
Human papillomavirus 120 regulatory protein E2 (gene: E2)	4/54	0.0257904	0.142069	0	0	3.56125	13.0262	STAT1;RPL23;RPS20;DYNLL1
Human papillomavirus type 101 E2 protein	4/54	0.0257904	0.141953	0	0	3.56125	13.0262	STAT1;RPL23;RPS20;PABPC1
Influenza A virus (A/California/04/2009(H1N1)) matrix protein 1 (gene: M1)	4/54	0.0257904	0.141837	0	0	3.56125	13.0262	HSPA8;HSPA5;STAT1;UBC
Lordsdale virus capsid protein (gene: orf2)	4/54	0.0257904	0.141721	0	0	3.56125	13.0262	LGALS1;STAT1;UBC;SQSTM1
Norovirus Hu/GII-4/CUK-3/2008/KR capsid protein	4/54	0.0257904	0.141605	0	0	3.56125	13.0262	LGALS1;STAT1;UBC;SQSTM1
Norovirus Hu/GII.4/NIHIC28.5/2012/USA protein p48 (gene: POL)	4/54	0.0257904	0.141489	0	0	3.56125	13.0262	HSP90AB1;HSPA5;STAT1;SQSTM1
Cercopithecine betaherpesvirus 5 capsid maturation protease (gene: UL80)	3/31	0.0261036	0.143091	0	0	4.65261	16.9619	STAT1;UBC;SQSTM1
Human adenovirus 19 DNA binding (gene: E2A)	3/31	0.0261036	0.142974	0	0	4.65261	16.9619	STAT1;UBC;HIST1H2AB
Human adenovirus 56 DNA-binding protein (gene: E2A)	3/31	0.0261036	0.142857	0	0	4.65261	16.9619	STAT1;UBC;HIST1H2AB
Human adenovirus D10 DNA binding protein (gene: E2A)	3/31	0.0261036	0.142741	0	0	4.65261	16.9619	STAT1;UBC;HIST1H2AB
Human cosavirus D VP3	3/31	0.0261036	0.142625	0	0	4.65261	16.9619	STAT1;FLNA;ICAM1
Human genital-associated circular DNA virus-1 replication-associated protein	3/31	0.0261036	0.142509	0	0	4.65261	16.9619	STAT1;UBC;SQSTM1
Human papillomavirus 107 E1 protein (gene: E1)	3/31	0.0261036	0.142393	0	0	4.65261	16.9619	STAT1;UBC;SQSTM1
Human papillomavirus 111 E1 protein (gene: E1)	3/31	0.0261036	0.142278	0	0	4.65261	16.9619	STAT1;UBC;SQSTM1
Human papillomavirus 134 E7 (gene: E7)	3/31	0.0261036	0.142162	0	0	4.65261	16.9619	STAT1;UBC;SQSTM1
Human papillomavirus 148 E7 (gene: E7)	3/31	0.0261036	0.142047	0	0	4.65261	16.9619	STAT1;UBC;SQSTM1
Human papillomavirus type 101 E1	3/31	0.0261036	0.141932	0	0	4.65261	16.9619	STAT1;UBC;SQSTM1
Human papillomavirus type 108 early protein E7 (gene: E7)	3/31	0.0261036	0.141817	0	0	4.65261	16.9619	STAT1;UBC;SQSTM1
Human papillomavirus type 147 replication protein (gene: E1)	3/31	0.0261036	0.141702	0	0	4.65261	16.9619	STAT1;UBC;SQSTM1
Human papillomavirus type 38b E1 protein (gene: E1)	3/31	0.0261036	0.141588	0	0	4.65261	16.9619	STAT1;UBC;SQSTM1
Human papillomavirus type 38b E7 protein (gene: E7)	3/31	0.0261036	0.141474	0	0	4.65261	16.9619	STAT1;UBC;SQSTM1
Human rhinovirus A32 1D	3/31	0.0261036	0.14136	0	0	4.65261	16.9619	HSPA5;STAT1;ICAM1
Human rhinovirus A56 1D	3/31	0.0261036	0.141246	0	0	4.65261	16.9619	HSPA5;STAT1;ICAM1
Human rhinovirus A57 1D	3/31	0.0261036	0.141132	0	0	4.65261	16.9619	STAT1;UBC;ICAM1
Human rhinovirus A67 1D	3/31	0.0261036	0.141018	0	0	4.65261	16.9619	STAT1;UBC;ICAM1
Human rhinovirus A73 1D (VP1)	3/31	0.0261036	0.140905	0	0	4.65261	16.9619	STAT1;UBC;ICAM1
Human rhinovirus B99 1D	3/31	0.0261036	0.140792	0	0	4.65261	16.9619	STAT1;UBC;ICAM1
Norovirus Hu/GII.3/HK71/1978/CHN capsid protein VP1 (gene: VP1)	3/31	0.0261036	0.140679	0	0	4.65261	16.9619	STAT1;UBC;SQSTM1
Horsepox virus HSPV189 (Serine/threonine protein kinase)	7/139	0.0263869	0.142092	0	0	2.42114	8.80057	HSPA8;HIST3H2A;HSPA5;STAT1;UBC;DYNLL1;HIST1H2AB
BK polyomavirus large T antigen	5/81	0.0268678	0.144565	0	0	2.96771	10.7337	HSPA8;HSPA5;STAT1;UBC;RPS20
Enterovirus A76 full_polyprotein 1..2198	5/81	0.0268678	0.14445	0	0	2.96771	10.7337	DAXX;STAT1;UBC;SQSTM1;ICAM1
Cowpox virus CPXV206 protein (gene: CPXV206 CDS)	11/271	0.0270183	0.145142	0	0	1.95146	7.0472	HSPA8;BMPR2;HSP90AB1;HSPA5;STAT1;PRDX1;UBC;PABPC1;RPS2;SQSTM1;SOD1
Echovirus E13 VP2	4/55	0.0273713	0.146921	0	0	3.4965	12.5813	STAT1;CFB;ICAM1;TAPBP
Echovirus E25 VP1	4/55	0.0273713	0.146804	0	0	3.4965	12.5813	STAT1;UBC;ICAM1;TAPBP
Echovirus E3 VP2	4/55	0.0273713	0.146687	0	0	3.4965	12.5813	STAT1;CFB;ICAM1;TAPBP
Human cosavirus B VP2	4/55	0.0273713	0.14657	0	0	3.4965	12.5813	STAT1;UBC;CFB;ICAM1
Human papillomavirus type 6b regulatory protein E2 (gene: E2)	4/55	0.0273713	0.146453	0	0	3.4965	12.5813	HSPA8;HSPA5;STAT1;UBC
Monkeypox virus DNA polymerase	4/55	0.0273713	0.146336	0	0	3.4965	12.5813	HSPA8;STAT1;UBC;SQSTM1
Norovirus Hu/GII.4/NIHIC27.1/2012/USA capsid protein VP1 (gene: VP1)	4/55	0.0273713	0.14622	0	0	3.4965	12.5813	LGALS1;STAT1;UBC;SQSTM1
Yaba-like disease virus 110R protein (gene: 110R)	4/55	0.0273713	0.146104	0	0	3.4965	12.5813	DDX5;STAT1;UBC;PABPC1
Human alphaherpesvirus 3 ubiquitin E3 ligase ICP0 (gene: ORF61)	10/238	0.0277793	0.148164	0	0	2.02004	7.23873	NFKBIA;HSP90AB1;UBB;STAT1;UBC;FHL1;ISG15;FAU;RPS27A;SQSTM1
Human herpesvirus 3 strain Dumas ring-finger protein	10/238	0.0277793	0.148046	0	0	2.02004	7.23873	NFKBIA;HSP90AB1;UBB;STAT1;UBC;FHL1;ISG15;FAU;RPS27A;SQSTM1
Colorado tick fever virus VP6	3/32	0.0283711	0.15108	0	0	4.50721	16.0564	HSPA8;HSPA5;STAT1
Coxsackievirus A13 3d	3/32	0.0283711	0.15096	0	0	4.50721	16.0564	UBC;SQSTM1;ICAM1
Dengue virus 1 membrane glycoprotein precursor M (gene: flavivirus polyprotein)	3/32	0.0283711	0.150841	0	0	4.50721	16.0564	HSPA8;HSPA5;HIST2H2AC
Dengue virus 3 capsid protein C (gene: flavivirus polyprotein)	3/32	0.0283711	0.150722	0	0	4.50721	16.0564	HSPA8;HSPA5;STAT1
Dengue virus 4 nonstructural protein NS3 (gene: flavivirus polyprotein)	3/32	0.0283711	0.150602	0	0	4.50721	16.0564	STAT1;UBC;SQSTM1
Ectromelia virus ERPV apoptosis inhibitor	3/32	0.0283711	0.150483	0	0	4.50721	16.0564	HSPA8;HSPA5;STAT1
Hepatitis C virus genotype 4 p7 protein	3/32	0.0283711	0.150365	0	0	4.50721	16.0564	HSPA8;HSPA5;STAT1
Human adenovirus 64 E2A DNA binding protein	3/32	0.0283711	0.150246	0	0	4.50721	16.0564	STAT1;UBC;HIST1H2AB
Human adenovirus 68 DNA binding protein (gene: E2A)	3/32	0.0283711	0.150128	0	0	4.50721	16.0564	HSP90AB1;STAT1;UBC
Human adenovirus D37 DNA-binding protein (gene: E2A)	3/32	0.0283711	0.150009	0	0	4.50721	16.0564	STAT1;UBC;HIST1H2AB
Human papillomavirus 104 E7 protein (gene: E7)	3/32	0.0283711	0.149891	0	0	4.50721	16.0564	STAT1;UBC;SQSTM1
Human papillomavirus 159 E1 protein (gene: E1)	3/32	0.0283711	0.149774	0	0	4.50721	16.0564	STAT1;UBC;SQSTM1
Human papillomavirus type 25 early protein (gene: E7)	3/32	0.0283711	0.149656	0	0	4.50721	16.0564	STAT1;UBC;SQSTM1
Human papillomavirus type 48 replication protein E1 (gene: E1)	3/32	0.0283711	0.149538	0	0	4.50721	16.0564	STAT1;UBC;SQSTM1
Human plasma-associated gemycircularvirus replication associated protein (gene: Rep)	3/32	0.0283711	0.149421	0	0	4.50721	16.0564	STAT1;UBC;SQSTM1
Human rhinovirus A59 1D (VP1)	3/32	0.0283711	0.149304	0	0	4.50721	16.0564	STAT1;UBC;ICAM1
Human rhinovirus A88 2C (P2-C)	3/32	0.0283711	0.149187	0	0	4.50721	16.0564	NFKBIA;STAT1;UBC
Human rhinovirus A9 1D	3/32	0.0283711	0.14907	0	0	4.50721	16.0564	STAT1;UBC;ICAM1
Human rhinovirus A90 1D	3/32	0.0283711	0.148954	0	0	4.50721	16.0564	STAT1;UBC;ICAM1
Yaba monkey tumor virus 71R	3/32	0.0283711	0.148837	0	0	4.50721	16.0564	STAT1;UBC;SQSTM1
Echovirus E32 VP4	2/13	0.0289321	0.151662	0	0	7.39645	26.2042	STAT1;UBC
Human T-lymphotropic virus 2 p19-gag protein [2]	2/13	0.0289321	0.151544	0	0	7.39645	26.2042	STAT1;UBC
Human adenovirus 34 23 kDa protein (gene: L3)	2/13	0.0289321	0.151426	0	0	7.39645	26.2042	STAT1;DYNLL1
Human adenovirus E4 adenain, protease	2/13	0.0289321	0.151308	0	0	7.39645	26.2042	STAT1;DYNLL1
Human cyclovirus VS5700009 capsid protein	2/13	0.0289321	0.15119	0	0	7.39645	26.2042	STAT1;UBC
Human mastadenovirus E protease (gene: L3)	2/13	0.0289321	0.151072	0	0	7.39645	26.2042	STAT1;DYNLL1
Human parechovirus 2A protein (gene: polyprotein)	2/13	0.0289321	0.150955	0	0	7.39645	26.2042	STAT1;UBC
Human parechovirus 4 capsid protein 1D	2/13	0.0289321	0.150838	0	0	7.39645	26.2042	HSPA5;STAT1
Salivirus NG-J1 VP3	2/13	0.0289321	0.150721	0	0	7.39645	26.2042	STAT1;ICAM1
Tai Forest ebolavirus polymerase complex protein (gene: VP35)	2/13	0.0289321	0.150604	0	0	7.39645	26.2042	STAT1;DYNLL1
Vaccinia virus hypothetical protein (gene: C6L)	2/13	0.0289321	0.150487	0	0	7.39645	26.2042	STAT1;UBC
Vaccinia virus Ankara 18.7k hypothetical protein	2/13	0.0289321	0.150371	0	0	7.39645	26.2042	STAT1;UBC
Western equine encephalitis virus NTPase	2/13	0.0289321	0.150255	0	0	7.39645	26.2042	UBC;DYNLL1
HBV genotype B preC/C protein (gene: preC/C)	4/56	0.0290089	0.150537	0	0	3.43407	12.1571	HSPA8;HSPA5;STAT1;UBC
HBV genotype C core protein (gene: C)	4/56	0.0290089	0.150421	0	0	3.43407	12.1571	HSPA8;HSPA5;STAT1;UBC
Human papillomavirus type 14D early protein (gene: E2)	4/56	0.0290089	0.150305	0	0	3.43407	12.1571	EEF1G;STAT1;RPL23;RPS20
Norovirus GII/Hu/JP/2002/GII.P5_GII.5/Saitama/T52 VP1 (gene: VP1)	4/56	0.0290089	0.150189	0	0	3.43407	12.1571	EEF1A1;STAT1;UBC;FLNA
Norovirus Hu/GII.g-GII.12/Gunnedah/NSW895P/2010/AU full_polyprotein 1..1701	4/56	0.0290089	0.150073	0	0	3.43407	12.1571	HSP90AB1;HSPA5;STAT1;SQSTM1
Macacine alphaherpesvirus 1 large tegument protein (gene: UL36)	5/83	0.0294541	0.152259	0	0	2.8962	10.2089	STAT1;UBC;ISG15;RPS27A;SQSTM1
Yaba-like disease virus 49R protein (gene: 49R)	5/83	0.0294541	0.152142	0	0	2.8962	10.2089	DDX17;DDX5;STAT1;UBC;PABPC1
Ectromelia virus ERPV tumor necrosis factor receptor	4/57	0.0307035	0.158473	0	0	3.37382	11.7523	CCL7;STAT1;CCL5;CCL2
HBV genotype C HBeAg (gene: PreC/C)	4/57	0.0307035	0.158352	0	0	3.37382	11.7523	HSPA8;HSPA5;STAT1;UBC
Hepatitis C virus subtype 3a full_polyprotein 1..3024	4/57	0.0307035	0.15823	0	0	3.37382	11.7523	HSPA8;HSPA5;STAT1;UBC
Norovirus Hu/GII-4/CGMH11/2006/TW major viral capsid protein	4/57	0.0307035	0.158109	0	0	3.37382	11.7523	LGALS1;STAT1;UBC;SQSTM1
Norovirus Hu/GII.4/NIHIC28.5/2012/USA capsid protein VP1 (gene: VP1)	4/57	0.0307035	0.157988	0	0	3.37382	11.7523	LGALS1;STAT1;FLNA;SQSTM1
Coxsackievirus A17 3D	3/33	0.0307397	0.158053	0	0	4.37063	15.2194	UBC;SQSTM1;ICAM1
Dengue virus 4 membrane glycoprotein precursor M (gene: flavivirus polyprotein)	3/33	0.0307397	0.157932	0	0	4.37063	15.2194	HSPA8;HSPA5;UBC
Human adenovirus 67 E2A DNA binding protein	3/33	0.0307397	0.157811	0	0	4.37063	15.2194	STAT1;UBC;HIST1H2AB
Human alphaherpesvirus 3 envelope glycoprotein E (gene: ORF68)	3/33	0.0307397	0.157691	0	0	4.37063	15.2194	STAT1;UBC;TAPBP
Human betaherpesvirus 5 capsid maturation protease (gene: UL80)	3/33	0.0307397	0.15757	0	0	4.37063	15.2194	STAT1;UBC;SQSTM1
Human coronavirus 229E nucleocapsid protein (gene: N)	3/33	0.0307397	0.15745	0	0	4.37063	15.2194	STAT1;PABPC1;SQSTM1
Human enterovirus C102 3d	3/33	0.0307397	0.15733	0	0	4.37063	15.2194	UBC;SQSTM1;ICAM1
Human herpesvirus 3 strain Dumas membrane glycoprotein gE	3/33	0.0307397	0.15721	0	0	4.37063	15.2194	STAT1;UBC;TAPBP
Human mastadenovirus B single-stranded DNA-binding protein (gene: E2A)	3/33	0.0307397	0.157091	0	0	4.37063	15.2194	HSP90AB1;STAT1;UBC
Human papillomavirus 179 E7 protein (gene: E7)	3/33	0.0307397	0.156971	0	0	4.37063	15.2194	GSTP1;UBC;SQSTM1
Human papillomavirus type 13 E7 (gene: E7)	3/33	0.0307397	0.156852	0	0	4.37063	15.2194	STAT1;UBC;SQSTM1
Human papillomavirus type 50 replication protein E1 (gene: E1)	3/33	0.0307397	0.156733	0	0	4.37063	15.2194	STAT1;UBC;SQSTM1
Human rhinovirus A33 1D	3/33	0.0307397	0.156614	0	0	4.37063	15.2194	STAT1;UBC;ICAM1
Human rhinovirus A54 1D	3/33	0.0307397	0.156495	0	0	4.37063	15.2194	STAT1;UBC;ICAM1
Human rhinovirus A55 1D (VP1)	3/33	0.0307397	0.156377	0	0	4.37063	15.2194	STAT1;UBC;ICAM1
Human rhinovirus A62 1D	3/33	0.0307397	0.156258	0	0	4.37063	15.2194	STAT1;UBC;ICAM1
Monkeypox virus Zaire-96-I-16 L6R (gene: L6R)	3/33	0.0307397	0.15614	0	0	4.37063	15.2194	STAT1;UBC;SQSTM1
Papiine alphaherpesvirus 2 deoxyuridine triphosphatase (gene: UL50)	3/33	0.0307397	0.156022	0	0	4.37063	15.2194	STAT1;UBC;SQSTM1
Vaccinia virus Ankara mRNA destabilisation protein	3/33	0.0307397	0.155904	0	0	4.37063	15.2194	STAT1;UBC;SQSTM1
Zika virus anchored capsid protein C (gene: flavivirus polyprotein)	3/33	0.0307397	0.155787	0	0	4.37063	15.2194	HSPA8;HSPA5;UBC
Banna virus strain JKT-6423 vp12	6/113	0.0307726	0.155836	0	0	2.55276	8.88648	HSPA8;HSP90AB1;HSPA5;STAT1;RPS3;SQSTM1
Coxsackievirus B4 full_polyprotein 1..2183	6/114	0.0319361	0.161606	0	0	2.53036	8.71462	STAT1;UBC;SQSTM1;CFB;ICAM1;TAPBP
Horsepox virus HSPV192 (IL-beta-binding protein; Provisional)	8/177	0.0321474	0.162552	0	0	2.17297	7.46941	PTPRB;HSPA5;STAT1;UBC;FLNA;IGFBP7;ICAM1;VEGFA
Human adenovirus 52 E3 CR1-beta1 (gene: E3)	10/244	0.0321635	0.162512	0	0	1.97037	6.77199	CD274;PTPRB;HSPA5;VWF;STAT1;UBC;FLNA;ISG15;SQSTM1;ICAM1
Human papillomavirus type 114 E2 protein (gene: E2)	7/145	0.032184	0.162493	0	0	2.32095	7.97546	EEF1G;HSPA5;STAT1;RPS20;PABPC1;DYNLL1;VEGFA
Human papillomavirus 125 putative E2 protein (gene: E2)	5/85	0.0321923	0.162412	0	0	2.82805	9.71728	STAT1;RPS20;PABPC1;DYNLL1;SQSTM1
HBV recombinant C/G HBeAg (gene: preC/C)	4/58	0.0324552	0.163616	0	0	3.31565	11.3657	HSPA8;HSPA5;STAT1;UBC
Alkhumra hemorrhagic fever virus PreM protein	3/34	0.033209	0.167291	0	0	4.24208	14.444	HSPA5;STAT1;UBC
Cowpox virus CPXV127 protein (gene: CPXV127 CDS)	3/34	0.033209	0.167165	0	0	4.24208	14.444	STAT1;UBC;SQSTM1
Coxsackievirus A6 VP2 protein	3/34	0.033209	0.16704	0	0	4.24208	14.444	STAT1;FLNA;TAPBP
Dengue virus 1 nonstructural protein NS3 (gene: flavivirus polyprotein)	3/34	0.033209	0.166915	0	0	4.24208	14.444	STAT1;UBC;SQSTM1
Ectromelia virus ERPV RNA polymerase 147 subunit	3/34	0.033209	0.16679	0	0	4.24208	14.444	STAT1;UBC;SQSTM1
Hepatitis C virus (isolate 6a33) putative p7 protein	3/34	0.033209	0.166665	0	0	4.24208	14.444	HSPA8;HSPA5;STAT1
Hepatitis C virus genotype 6 p7 protein	3/34	0.033209	0.166541	0	0	4.24208	14.444	HSPA8;HSPA5;STAT1
Horsepox virus HSPV116 (VD10, 8-oxo-dGTP pyrophosphatase MutT and related house-cleaning NTP pyrophosphohydrolases)	3/34	0.033209	0.166417	0	0	4.24208	14.444	STAT1;UBC;SQSTM1
Human adenovirus 52 E4 ORF1 (gene: E4)	3/34	0.033209	0.166293	0	0	4.24208	14.444	STAT1;UBC;SQSTM1
Human cosavirus D VP1	3/34	0.033209	0.166169	0	0	4.24208	14.444	STAT1;SQSTM1;ICAM1
Human gammaherpesvirus 4 membrane protein (gene: BILF1)	3/34	0.033209	0.166045	0	0	4.24208	14.444	HSPA8;STAT1;UBC
Human herpesvirus 4 type 2 BILF1	3/34	0.033209	0.165921	0	0	4.24208	14.444	HSPA8;STAT1;UBC
Human papillomavirus 116 E7 protein	3/34	0.033209	0.165798	0	0	4.24208	14.444	STAT1;UBC;SQSTM1
Human papillomavirus 139 replication protein (gene: E1)	3/34	0.033209	0.165675	0	0	4.24208	14.444	STAT1;UBC;SQSTM1
Human papillomavirus type 103 E7 protein	3/34	0.033209	0.165552	0	0	4.24208	14.444	STAT1;UBC;SQSTM1
Human papillomavirus type 153 E1 protein (gene: E1)	3/34	0.033209	0.165429	0	0	4.24208	14.444	STAT1;UBC;SQSTM1
Human papillomavirus type 7 early protein (gene: E7)	3/34	0.033209	0.165306	0	0	4.24208	14.444	STAT1;UBC;SQSTM1
Human rhinovirus A41 1D (VP1)	3/34	0.033209	0.165184	0	0	4.24208	14.444	STAT1;UBC;ICAM1
Human rhinovirus A44 1D (VP1)	3/34	0.033209	0.165062	0	0	4.24208	14.444	STAT1;UBC;ICAM1
Human rhinovirus A76 1D	3/34	0.033209	0.16494	0	0	4.24208	14.444	STAT1;UBC;ICAM1
Louping ill virus premembrane protein	3/34	0.033209	0.164818	0	0	4.24208	14.444	HSPA5;STAT1;UBC
Maraba virus phosphoprotein (gene: P)	3/34	0.033209	0.164696	0	0	4.24208	14.444	STAT1;UBC;SQSTM1
Molluscum contagiosum virus subtype 1 MC061R (gene: MC061R)	3/34	0.033209	0.164574	0	0	4.24208	14.444	STAT1;UBC;SQSTM1
Mupapillomavirus 1 E7 protein (gene: E7)	3/34	0.033209	0.164453	0	0	4.24208	14.444	STAT1;GSTP1;UBC
Norovirus Hu/GII.4/NIHIC28.4/2012/USA protein p48 (gene: POL)	3/34	0.033209	0.164332	0	0	4.24208	14.444	HSP90AB1;HSPA5;STAT1
Rio Bravo virus PreM protein	3/34	0.033209	0.164211	0	0	4.24208	14.444	HSPA5;STAT1;UBC
Variola virus hypothetical protein (gene: L6R)	3/34	0.033209	0.16409	0	0	4.24208	14.444	STAT1;UBC;SQSTM1
Crimean-Congo hemorrhagic fever virus full_polyprotein 1..3945 (gene: RdRp)	7/146	0.0332266	0.164056	0	0	2.30506	7.84735	UBB;UBC;ISG15;FAU;RPS27A;SQSTM1;UBA52
Cowpox virus CPXV187 protein (gene: CPXV187 CDS)	2/14	0.0332972	0.164284	0	0	6.86813	23.3673	STAT1;UBC
Horsepox virus HSPV171 (Orthopoxvirus A49R protein)	2/14	0.0332972	0.164164	0	0	6.86813	23.3673	STAT1;UBC
Human Respiratory syncytial virus 9320 M2-1	2/14	0.0332972	0.164043	0	0	6.86813	23.3673	STAT1;UBC
Human cyclovirus capsid protein	2/14	0.0332972	0.163923	0	0	6.86813	23.3673	STAT1;DYNLL1
Human enteric coronavirus 4408 small envelope protein (gene: E)	2/14	0.0332972	0.163803	0	0	6.86813	23.3673	STAT1;UBC
Human enteric coronavirus strain 4408 envelope protein	2/14	0.0332972	0.163683	0	0	6.86813	23.3673	STAT1;UBC
Human gammaherpesvirus 4 BFRF1 protein (gene: BFRF1)	2/14	0.0332972	0.163563	0	0	6.86813	23.3673	STAT1;SQSTM1
Mengo virus 1C	2/14	0.0332972	0.163444	0	0	6.86813	23.3673	STAT1;ICAM1
Vaccinia virus Ankara 17.4k hypothetical protein	2/14	0.0332972	0.163324	0	0	6.86813	23.3673	STAT1;SQSTM1
Yaba-like disease virus 3L protein (gene: 3L)	2/14	0.0332972	0.163205	0	0	6.86813	23.3673	STAT1;SQSTM1
Yellow fever virus M protein precursor	2/14	0.0332972	0.163086	0	0	6.86813	23.3673	STAT1;UBC
Human alphaherpesvirus 2 helicase-primase helicase subunit (gene: UL5)	4/59	0.0342643	0.1677	0	0	3.25945	10.9963	HSP90AB1;HSPA5;STAT1;UBC
Marburg virus - Musoke, Kenya, 1980 glycoprotein (gene: GP)	7/148	0.0353788	0.173029	0	0	2.27391	7.59859	HSPA8;TPM4;HSPA5;TPM3;STAT1;UBC;SQSTM1
Human papillomavirus 113 E1 protein (gene: E1)	3/35	0.0357783	0.174855	0	0	4.12088	13.7242	STAT1;UBC;SQSTM1
Human papillomavirus 139 transforming protein (gene: E7)	3/35	0.0357783	0.174728	0	0	4.12088	13.7242	STAT1;RPS20;SQSTM1
Human papillomavirus 15 early protein (gene: E7)	3/35	0.0357783	0.174601	0	0	4.12088	13.7242	STAT1;UBC;SQSTM1
Human papillomavirus 9 early protein (gene: E1)	3/35	0.0357783	0.174475	0	0	4.12088	13.7242	STAT1;UBC;SQSTM1
Human papillomavirus type 144 transforming protein (gene: E7)	3/35	0.0357783	0.174348	0	0	4.12088	13.7242	HSPA5;UBC;SQSTM1
Human papillomavirus type 163 E1 (gene: E1)	3/35	0.0357783	0.174221	0	0	4.12088	13.7242	STAT1;UBC;SQSTM1
Human papillomavirus type 49 E1 protein (gene: E1)	3/35	0.0357783	0.174095	0	0	4.12088	13.7242	STAT1;UBC;SQSTM1
Human rhinovirus A22 1D	3/35	0.0357783	0.173969	0	0	4.12088	13.7242	HSPA5;STAT1;ICAM1
Variola virus hypothetical protein (gene: A41L)	3/35	0.0357783	0.173843	0	0	4.12088	13.7242	HSPA5;STAT1;UBC
Monkeypox virus Zaire-96-I-16 B3R (gene: B3R)	8/181	0.035973	0.174663	0	0	2.12495	7.06542	HSPA8;BMPR2;HSP90AB1;HSPA5;STAT1;UBC;S100A9;SQSTM1
HBV recombinant B/C HBc protein (gene: C)	4/60	0.0361309	0.175303	0	0	3.20513	10.643	HSPA8;HSPA5;STAT1;UBC
Human alphaherpesvirus 2 DNA replication origin-binding helicase (gene: UL9)	4/60	0.0361309	0.175176	0	0	3.20513	10.643	DDX5;STAT1;PABPC1;DYNLL1
Macacine alphaherpesvirus 1 DNA replication origin-binding helicase (gene: UL9)	4/60	0.0361309	0.17505	0	0	3.20513	10.643	DDX5;STAT1;UBC;ISG15
Yaba-like disease virus 133L protein (gene: 133L)	5/88	0.0365887	0.17714	0	0	2.73164	9.03632	HSD11B1;HPGD;STAT1;FASN;UBC
Enterovirus B genome polyportein	6/118	0.036875	0.178398	0	0	2.44459	8.06768	C3;STAT1;UBC;SQSTM1;CFB;ICAM1
Monkeypox virus Zaire-96-I-16 B11R (gene: B11R)	6/118	0.036875	0.178269	0	0	2.44459	8.06768	HSPA8;HSP90AB1;HSPA5;STAT1;UBC;SQSTM1
Coxsackievirus A17 VP4	2/15	0.0379007	0.183096	0	0	6.41026	20.9794	STAT1;UBC
Cyclovirus VN capsid protein	2/15	0.0379007	0.182964	0	0	6.41026	20.9794	STAT1;SQSTM1
Hepatitis C virus genotype 4 NS5B RNA-dependent RNA polymerase	2/15	0.0379007	0.182833	0	0	6.41026	20.9794	STAT1;UBC
Human adenovirus 11+34 E4 ORF3 protein (gene: E4)	2/15	0.0379007	0.182701	0	0	6.41026	20.9794	STAT1;SQSTM1
Human adenovirus 11a E4 ORF3 protein	2/15	0.0379007	0.18257	0	0	6.41026	20.9794	STAT1;SQSTM1
Human adenovirus 11a L1 protein IIIa precursor	2/15	0.0379007	0.18244	0	0	6.41026	20.9794	STAT1;UBC
Human adenovirus 14 Orf3 protein (gene: E4)	2/15	0.0379007	0.182309	0	0	6.41026	20.9794	STAT1;SQSTM1
Human adenovirus 3+7 peripentonal hexon associated protein IIIa precursor (gene: L1)	2/15	0.0379007	0.182178	0	0	6.41026	20.9794	STAT1;UBC
Human adenovirus 34 Orf3 protein (gene: E4)	2/15	0.0379007	0.182048	0	0	6.41026	20.9794	STAT1;SQSTM1
Human adenovirus 34 protein IIIa precursor (gene: L1)	2/15	0.0379007	0.181918	0	0	6.41026	20.9794	STAT1;UBC
Human adenovirus 35 pIIIa	2/15	0.0379007	0.181788	0	0	6.41026	20.9794	STAT1;UBC
Human adenovirus 35 E4 ORF3	2/15	0.0379007	0.181658	0	0	6.41026	20.9794	STAT1;SQSTM1
Human adenovirus 55 L1 pIIIa 65.6 kDa protein	2/15	0.0379007	0.181529	0	0	6.41026	20.9794	STAT1;UBC
Human adenovirus 55 E4 ORF3 13.6 kDa protein	2/15	0.0379007	0.181399	0	0	6.41026	20.9794	STAT1;SQSTM1
Human adenovirus 66 ORF3 (gene: E4)	2/15	0.0379007	0.18127	0	0	6.41026	20.9794	STAT1;SQSTM1
Human adenovirus 7d2 ORF3 (gene: E4)	2/15	0.0379007	0.181141	0	0	6.41026	20.9794	STAT1;SQSTM1
Human betaherpesvirus 5 helicase-primase helicase subunit (gene: UL105)	2/15	0.0379007	0.181012	0	0	6.41026	20.9794	STAT1;UBC
Human betaherpesvirus 5 membrane protein US17 (gene: US17)	2/15	0.0379007	0.180884	0	0	6.41026	20.9794	STAT1;UBC
Human herpesvirus 4 type 2 BFRF1	2/15	0.0379007	0.180755	0	0	6.41026	20.9794	STAT1;SQSTM1
Human mastadenovirus B control protein E4orf3 (gene: E4)	2/15	0.0379007	0.180627	0	0	6.41026	20.9794	STAT1;SQSTM1
HBV genotype C preC/C protein (gene: preC/C)	4/61	0.0380552	0.181235	0	0	3.15259	10.3049	HSPA8;HSPA5;STAT1;UBC
Human adenovirus 16 maturation protein IVA2 (gene: IVa2)	4/61	0.0380552	0.181106	0	0	3.15259	10.3049	UBB;STAT1;UBC;ISG15
Human adenovirus 7d2 maturation protein IVA2 (gene: IVa2)	4/61	0.0380552	0.180978	0	0	3.15259	10.3049	UBB;HSPA5;STAT1;UBC
Human papillomavirus 110 E2 protein (gene: E2)	4/61	0.0380552	0.18085	0	0	3.15259	10.3049	STAT1;RPL23;RPS20;DYNLL1
Yaba-like disease virus 86R protein (gene: 86R)	4/61	0.0380552	0.180722	0	0	3.15259	10.3049	STAT1;UBC;MYH9;SQSTM1
Ectromelia virus ERPV IL-1 beta receptor	5/89	0.0381321	0.180959	0	0	2.70095	8.82319	STAT1;UBC;MYH9;FLNA;PTPRF
Cyclovirus VN replication-association protein	3/36	0.038447	0.182325	0	0	4.00641	13.0548	STAT1;DYNLL1;SQSTM1
Human adenovirus 28 single-stranded DNA binding protein (gene: E2A)	3/36	0.038447	0.182196	0	0	4.00641	13.0548	STAT1;UBC;HIST1H2AB
Human alphaherpesvirus 3 deoxyuridine triphosphatase (gene: ORF8)	3/36	0.038447	0.182067	0	0	4.00641	13.0548	HSPA5;STAT1;SQSTM1
Human betaherpesvirus 7 deoxyuridine triphosphatase (gene: U45)	3/36	0.038447	0.181939	0	0	4.00641	13.0548	HSPA5;STAT1;MYH9
Human herpesvirus 3 strain Dumas deoxyuridine triphosphatase	3/36	0.038447	0.181811	0	0	4.00641	13.0548	HSPA5;STAT1;SQSTM1
Human herpesvirus 4 type 2 FGAM-synthase	3/36	0.038447	0.181683	0	0	4.00641	13.0548	DAXX;UBC;SQSTM1
Human mastadenovirus D single-stranded DNA-binding protein (gene: E2A)	3/36	0.038447	0.181555	0	0	4.00641	13.0548	STAT1;UBC;HIST1H2AB
Human papillomavirus 126 hypothetical protein (gene: HpV126gp2)	3/36	0.038447	0.181428	0	0	4.00641	13.0548	STAT1;UBC;SQSTM1
Human papillomavirus 133 E1 (gene: E1)	3/36	0.038447	0.1813	0	0	4.00641	13.0548	STAT1;UBC;SQSTM1
Human papillomavirus 155 E1	3/36	0.038447	0.181173	0	0	4.00641	13.0548	STAT1;UBC;SQSTM1
Human papillomavirus 5 replication protein (gene: E1)	3/36	0.038447	0.181046	0	0	4.00641	13.0548	STAT1;UBC;SQSTM1
Human papillomavirus type 166 E7 (gene: E7)	3/36	0.038447	0.180919	0	0	4.00641	13.0548	HSPA5;UBC;SQSTM1
Human papillomavirus type 96 E7	3/36	0.038447	0.180792	0	0	4.00641	13.0548	STAT1;UBC;SQSTM1
Human rhinovirus A95 1D	3/36	0.038447	0.180666	0	0	4.00641	13.0548	STAT1;UBC;ICAM1
Human rhinovirus B27 1B	3/36	0.038447	0.18054	0	0	4.00641	13.0548	STAT1;CFB;ICAM1
Norovirus Hu/GII.4/5M/USA/2004 VP1	3/36	0.038447	0.180413	0	0	4.00641	13.0548	STAT1;UBC;SQSTM1
Orf virus ORF025 DNA polymerase	3/36	0.038447	0.180287	0	0	4.00641	13.0548	STAT1;UBC;SQSTM1
Vaccinia virus contains mutT-like motif of NTP-phosphohydrolase for DNA repair (gene: D10R)	3/36	0.038447	0.180162	0	0	4.00641	13.0548	STAT1;UBC;SQSTM1
Human betaherpesvirus 5 membrane protein UL6 (gene: UL6)	7/152	0.0399555	0.1871	0	0	2.21407	7.12928	CD274;PTPRB;STAT1;UBC;FLNA;SQSTM1;VEGFA
Norwalk-like virus full_polyprotein 1..1697	4/62	0.0400372	0.187352	0	0	3.10174	9.98122	HSP90AB1;STAT1;UBC;SQSTM1
Cowpox virus vCCI or CPXV003 protein (gene: vCCI)	3/37	0.0412142	0.192725	0	0	3.89813	12.431	CCL7;STAT1;CCL5
Human betaherpesvirus 6A envelope glycoprotein UL33 (gene: U12)	3/37	0.0412142	0.192591	0	0	3.89813	12.431	HSPA8;HSPA5;STAT1
Human betaherpesvirus 6B proteinase (gene: U53)	3/37	0.0412142	0.192457	0	0	3.89813	12.431	STAT1;UBC;SQSTM1
Human gammaherpesvirus 4 putative nmembrane antigen p140 (gene: BNRF1)	3/37	0.0412142	0.192323	0	0	3.89813	12.431	DAXX;STAT1;UBC
Human papillomavirus type 144 replication protein (gene: E1)	3/37	0.0412142	0.19219	0	0	3.89813	12.431	STAT1;UBC;SQSTM1
Human papillomavirus type 43 E7 protein (gene: E7)	3/37	0.0412142	0.192056	0	0	3.89813	12.431	STAT1;UBC;SQSTM1
Norovirus Hu/GII.4/gg-12-08-04/2012/KR major capsid protein	3/37	0.0412142	0.191923	0	0	3.89813	12.431	STAT1;UBC;SQSTM1
Trichodysplasia spinulosa-associated polyomavirus small T antigen (gene: T)	3/37	0.0412142	0.19179	0	0	3.89813	12.431	HSPA8;STAT1;UBC
Yaba monkey tumor virus hypothetical protein	3/37	0.0412142	0.191657	0	0	3.89813	12.431	HSPA5;STAT1;UBC
Yaba monkey tumor virus RNA polymerase	3/37	0.0412142	0.191525	0	0	3.89813	12.431	DAXX;STAT1;UBC
Variola virus hypothetical protein (gene: F10R)	5/91	0.041337	0.191962	0	0	2.64159	8.4161	STAT1;UBC;MYH9;PABPC1;SQSTM1
Human papillomavirus type 49 E2 protein (gene: E2)	4/63	0.042077	0.195264	0	0	3.0525	9.67111	EEF1G;STAT1;RPL23;DYNLL1
Monkeypox virus Zaire-96-I-16 J2L (gene: J2L)	4/63	0.042077	0.195129	0	0	3.0525	9.67111	CCL7;STAT1;CCL5;CCL2
Cowpox virus CPXV029 protein (gene: CPXV029 CDS)	2/16	0.0427308	0.198024	0	0	6.00962	18.9473	HSPA8;STAT1
Cowpox virus CPXV190 protein (gene: CPXV190 CDS)	2/16	0.0427308	0.197888	0	0	6.00962	18.9473	HSPA5;STAT1
Hepatitis C virus (isolate 6a33) putative NS5B protein	2/16	0.0427308	0.197752	0	0	6.00962	18.9473	STAT1;UBC
Hepatitis C virus genotype 6 NS5B RNA-dependent RNA polymerase	2/16	0.0427308	0.197615	0	0	6.00962	18.9473	STAT1;UBC
Horsepox virus HSPV024 (host-range protein; Provisional)	2/16	0.0427308	0.197479	0	0	6.00962	18.9473	HSPA8;STAT1
Human adenovirus E4 protein IIIa	2/16	0.0427308	0.197343	0	0	6.00962	18.9473	STAT1;UBC
Human betaherpesvirus 5 envelope protein US28 (gene: US28)	2/16	0.0427308	0.197208	0	0	6.00962	18.9473	STAT1;UBC
Human betaherpesvirus 6 U81, uracil-DNA glycosylase (gene: U81)	2/16	0.0427308	0.197072	0	0	6.00962	18.9473	RPS20;RPS2
Human betaherpesvirus 6A uracil-DNA glycosylase (gene: U81)	2/16	0.0427308	0.196937	0	0	6.00962	18.9473	RPS20;RPS2
Human mastadenovirus E capsid protein precursor pIIIa (gene: L1)	2/16	0.0427308	0.196802	0	0	6.00962	18.9473	STAT1;UBC
Human papillomavirus type 153 E7 protein (gene: E7)	2/16	0.0427308	0.196667	0	0	6.00962	18.9473	UBC;SQSTM1
Human papillomavirus type 26 early protein (gene: E6)	2/16	0.0427308	0.196532	0	0	6.00962	18.9473	STAT1;UBC
Human papillomavirus type 52 early protein (gene: E6)	2/16	0.0427308	0.196398	0	0	6.00962	18.9473	STAT1;UBC
Human rhinovirus A25 2C	2/16	0.0427308	0.196264	0	0	6.00962	18.9473	STAT1;UBC
Human rhinovirus B86 2A	2/16	0.0427308	0.196129	0	0	6.00962	18.9473	STAT1;SQSTM1
Rhinovirus B14 2A (P2-A)	2/16	0.0427308	0.195996	0	0	6.00962	18.9473	STAT1;ICAM1
WU Polyomavirus Small T antigen	2/16	0.0427308	0.195862	0	0	6.00962	18.9473	STAT1;UBC
West Nile virus H442 membrane protein	2/16	0.0427308	0.195728	0	0	6.00962	18.9473	STAT1;UBC
West Nile virus SA381/00 membrane protein	2/16	0.0427308	0.195595	0	0	6.00962	18.9473	STAT1;UBC
West Nile virus SA93/01 membrane protein	2/16	0.0427308	0.195461	0	0	6.00962	18.9473	STAT1;UBC
West Nile virus SPU116/89 membrane protein	2/16	0.0427308	0.195328	0	0	6.00962	18.9473	STAT1;UBC
West Nile virus lineage 1 membrane glycoprotein M (gene: flavivirus polyprotein)	2/16	0.0427308	0.195196	0	0	6.00962	18.9473	STAT1;UBC
Human adenovirus 43 CR1-beta protein (gene: E3)	5/92	0.0429986	0.196285	0	0	2.61288	8.22164	PTPRB;HSPA5;STAT1;UBC;IGFBP7
Monkeypox virus Zaire-96-I-16 IL-beta-binding protein (gene: B14R)	5/92	0.0429986	0.196152	0	0	2.61288	8.22164	STAT1;UBC;MYH9;FLNA;VEGFA
Alkhumra hemorrhagic fever virus core protein C	3/38	0.044079	0.200944	0	0	3.79555	11.8488	HSPA8;HSPA5;RPL13
Coxsackievirus A11 vp2	3/38	0.044079	0.200808	0	0	3.79555	11.8488	STAT1;CFB;ICAM1
Coxsackievirus A17 VP2	3/38	0.044079	0.200672	0	0	3.79555	11.8488	STAT1;CFB;ICAM1
Coxsackievirus A18 VP2 protein	3/38	0.044079	0.200536	0	0	3.79555	11.8488	STAT1;CFB;ICAM1
Echovirus E7 VP3	3/38	0.044079	0.2004	0	0	3.79555	11.8488	STAT1;FLNA;ICAM1
Human adenovirus 46 ORF4	3/38	0.044079	0.200264	0	0	3.79555	11.8488	STAT1;UBC;SQSTM1
Human adenovirus 58 ORF1 (gene: E4)	3/38	0.044079	0.200129	0	0	3.79555	11.8488	STAT1;UBC;SQSTM1
Human adenovirus 63 Orf 1 protein (gene: E4)	3/38	0.044079	0.199994	0	0	3.79555	11.8488	STAT1;UBC;SQSTM1
Human papillomavirus 17 early protein (gene: E7)	3/38	0.044079	0.199859	0	0	3.79555	11.8488	STAT1;UBC;SQSTM1
Human papillomavirus 99 E7 protein (gene: E7)	3/38	0.044079	0.199724	0	0	3.79555	11.8488	GSTP1;UBC;SQSTM1
Human papillomavirus type 40 early protein (gene: E7)	3/38	0.044079	0.199589	0	0	3.79555	11.8488	GSTP1;UBC;SQSTM1
Human parainfluenza virus 2 P protein (gene: V)	3/38	0.044079	0.199455	0	0	3.79555	11.8488	HSPA8;HSPA5;UBC
Human parechovirus 4 RNA-dependent RNA Polymerase	3/38	0.044079	0.19932	0	0	3.79555	11.8488	STAT1;UBC;SQSTM1
Human rhinovirus A28 2C (P2-C)	3/38	0.044079	0.199186	0	0	3.79555	11.8488	STAT1;UBC;SQSTM1
Norovirus Hu/GII.4/CHDC2094/1974/US VP1	3/38	0.044079	0.199052	0	0	3.79555	11.8488	STAT1;UBC;SQSTM1
Orf virus ORF014 modified RING finger protein	3/38	0.044079	0.198918	0	0	3.79555	11.8488	STAT1;GSTP1;UBC
Rotavirus C nonstructural protein 3 (gene: NSP3)	3/38	0.044079	0.198785	0	0	3.79555	11.8488	HSPA5;STAT1;UBC
Yaba-like disease virus 55R protein (gene: 55R)	3/38	0.044079	0.198651	0	0	3.79555	11.8488	DAXX;STAT1;UBC
Yaba-like disease virus 88L protein (gene: 88L)	3/38	0.044079	0.198518	0	0	3.79555	11.8488	DDX17;DDX5;STAT1
Echovirus E32 VP2	4/64	0.0441745	0.198815	0	0	3.00481	9.37382	HSPA5;STAT1;CFB;ICAM1
Human gammaherpesvirus 8 vIRF-4 (gene: vIRF-4)	4/64	0.0441745	0.198682	0	0	3.00481	9.37382	STAT1;IRF1;PABPC1;SQSTM1
Horsepox virus HSPV043 (Kelch-like protein; Provisional)	10/258	0.0442369	0.198829	0	0	1.86345	5.81059	LGALS3BP;HSPA8;HSP90AB1;UBB;HSPA5;STAT1;UBC;ISG15;RPS27A;SQSTM1
Yaba-like disease virus 19L protein (gene: 19L)	8/189	0.04452	0.199968	0	0	2.035	6.33255	LGALS3BP;HSPA8;HSPA5;STAT1;FBXO2;UBC;ISG15;SQSTM1
Human betaherpesvirus 5 membrane glycoprotein UL18 (gene: UL18)	10/259	0.0452026	0.202898	0	0	1.85625	5.74807	HSPA8;HSP90AB1;HSPA5;STAT1;UBC;FLNA;SQSTM1;HIST2H2AC;RPL19;TAPBP
Ectromelia virus ERPV interferon gamma receptor	4/65	0.0463296	0.207818	0	0	2.95858	9.08868	PTPRB;STAT1;UBC;PTPRF
Hepatitis C virus subtype 2a full_polyprotein 1..3033	4/65	0.0463296	0.207679	0	0	2.95858	9.08868	HSPA8;DAXX;HSPA5;STAT1
Human papillomavirus 100 E2 protein (gene: E2)	4/65	0.0463296	0.207541	0	0	2.95858	9.08868	EEF1G;STAT1;RPL23;RPS20
Human adenovirus 22 50.0 kDa protein (gene: E3)	5/94	0.0464411	0.207901	0	0	2.55728	7.84976	STAT1;UBC;FLNA;IGFBP7;PTPRF
Human papillomavirus type 40 early protein (gene: E2)	6/125	0.0466409	0.208656	0	0	2.30769	7.07372	EEF1G;HSPA5;STAT1;RPS20;PABPC1;DYNLL1
Coxsackievirus A1 VP2	3/39	0.0470404	0.210304	0	0	3.69822	11.3045	STAT1;CFB;ICAM1
Coxsackievirus A13 vp1	3/39	0.0470404	0.210164	0	0	3.69822	11.3045	STAT1;UBC;ICAM1
Coxsackievirus A22 vp1	3/39	0.0470404	0.210024	0	0	3.69822	11.3045	STAT1;FLNA;ICAM1
Enterovirus C109 VP2	3/39	0.0470404	0.209885	0	0	3.69822	11.3045	STAT1;CFB;ICAM1
Human adenovirus 19 ORF1 (gene: E4)	3/39	0.0470404	0.209745	0	0	3.69822	11.3045	HSPA5;STAT1;UBC
Human adenovirus 64 E4 7.4 kDa protein	3/39	0.0470404	0.209606	0	0	3.69822	11.3045	HSPA5;STAT1;UBC
Human adenovirus Chiba_E086/2012 Orf1 (gene: E4)	3/39	0.0470404	0.209467	0	0	3.69822	11.3045	HSPA5;STAT1;UBC
Human adenovirus D10 Orf1 protein (gene: E4)	3/39	0.0470404	0.209328	0	0	3.69822	11.3045	STAT1;UBC;SQSTM1
Human adenovirus D37 14.0 kDa (gene: E4)	3/39	0.0470404	0.20919	0	0	3.69822	11.3045	HSPA5;STAT1;UBC
Human coronavirus OC43 nsp1 (gene: orf1ab)	3/39	0.0470404	0.209051	0	0	3.69822	11.3045	STAT1;UBC;SQSTM1
Human enterovirus C117 VP2	3/39	0.0470404	0.208913	0	0	3.69822	11.3045	STAT1;CFB;ICAM1
Human enterovirus C118 VP2	3/39	0.0470404	0.208775	0	0	3.69822	11.3045	STAT1;CFB;ICAM1
Human gammaherpesvirus 8 K2 (gene: K2)	3/39	0.0470404	0.208637	0	0	3.69822	11.3045	HSPA8;HSPA5;STAT1
Human mastadenovirus D control protein E4orf1 (gene: E4)	3/39	0.0470404	0.208499	0	0	3.69822	11.3045	STAT1;UBC;SQSTM1
Human papillomavirus 130 E1 (gene: E1)	3/39	0.0470404	0.208362	0	0	3.69822	11.3045	STAT1;UBC;SQSTM1
Norovirus GII/Hu/JP/2007/GII.P7_GII.14/Sendai/YG99 VP1 (gene: VP1)	3/39	0.0470404	0.208224	0	0	3.69822	11.3045	HSPA5;STAT1;UBC
Vaccinia virus kelch-like protein (gene: C2L)	9/226	0.0474528	0.209911	0	0	1.91457	5.83564	LGALS3BP;HSPA8;UBB;HSPA5;STAT1;UBC;ISG15;RPS27A;SQSTM1
Ectromelia virus ERPV putative phosphotransferase anion transport protein	2/17	0.0477762	0.211203	0	0	5.65611	17.2015	HSPA8;STAT1
Encephalomyocarditis virus protein 1C	2/17	0.0477762	0.211064	0	0	5.65611	17.2015	STAT1;ICAM1
Enterovirus D capsid protein 1C version 1	2/17	0.0477762	0.210925	0	0	5.65611	17.2015	STAT1;ICAM1
Hepatitis C virus subtype 1a p7 protein	2/17	0.0477762	0.210787	0	0	5.65611	17.2015	HSPA8;STAT1
Horsepox virus HSPV174 (Toll/IL-receptor-like protein; Provisional)	2/17	0.0477762	0.210648	0	0	5.65611	17.2015	HSPA5;STAT1
Human adenovirus 23 protease protein (gene: L3)	2/17	0.0477762	0.21051	0	0	5.65611	17.2015	STAT1;UBC
Human rhinovirus A56 2C	2/17	0.0477762	0.210372	0	0	5.65611	17.2015	STAT1;UBC
KI polyomavirus Small T antigen	2/17	0.0477762	0.210234	0	0	5.65611	17.2015	STAT1;UBC
SARS coronavirus hypothetical protein sars9b	2/17	0.0477762	0.210096	0	0	5.65611	17.2015	UBC;SQSTM1
SARS coronavirus P2 hypothetical protein sars9b	2/17	0.0477762	0.209959	0	0	5.65611	17.2015	UBC;SQSTM1
SARS coronavirus Tor2 Orf13	2/17	0.0477762	0.209822	0	0	5.65611	17.2015	UBC;SQSTM1
Vaccinia virus host-range protein (gene: C7L)	2/17	0.0477762	0.209685	0	0	5.65611	17.2015	HSPA8;STAT1
Vaccinia virus Toll/IL-receptor-like protein (gene: A52R)	2/17	0.0477762	0.209548	0	0	5.65611	17.2015	HSPA5;STAT1
Vaccinia virus Ankara Toll/IL1-receptor signalling inhibitor	2/17	0.0477762	0.209411	0	0	5.65611	17.2015	HSPA5;STAT1
Variola virus hypothetical protein (gene: J3R)	2/17	0.0477762	0.209274	0	0	5.65611	17.2015	STAT1;UBC
Yaba monkey tumor virus putative alpha aminitin-sensitive protein	2/17	0.0477762	0.209138	0	0	5.65611	17.2015	STAT1;SQSTM1
Human rhinovirus B93 full_polyprotein 1..2178	5/95	0.0482221	0.210952	0	0	2.53036	7.67191	HSPA5;STAT1;UBC;SQSTM1;ICAM1
Variola virus DNA polymerase (gene: E9L)	4/66	0.0485424	0.212215	0	0	2.91375	8.81503	HSPA8;STAT1;UBC;SQSTM1
Human immunodeficiency virus 1 Envelope surface glycoprotein gp160, precursor (gene: env)	7/159	0.0488601	0.213465	0	0	2.11659	6.38956	HSPA8;HSPA5;STAT1;UBC;FLNA;SQSTM1;PTPRF
Human T-lymphotropic virus 4 polymerase (gene: pol)	5/96	0.0500429	0.21849	0	0	2.50401	7.49919	HSPA5;STAT1;UBC;SQSTM1;RPL6
Coxsackievirus A17 VP1	3/40	0.0500973	0.218586	0	0	3.60577	10.7949	STAT1;UBC;ICAM1
Echovirus E4 VP1	3/40	0.0500973	0.218444	0	0	3.60577	10.7949	STAT1;UBC;ICAM1
Human adenovirus 68 ORF1 (gene: E4)	3/40	0.0500973	0.218302	0	0	3.60577	10.7949	STAT1;UBC;SQSTM1
Human betaherpesvirus 6 U53, protease /assembly protein (gene: U53)	3/40	0.0500973	0.21816	0	0	3.60577	10.7949	STAT1;UBC;SQSTM1
Human betaherpesvirus 6A capsid maturation protease (gene: U53)	3/40	0.0500973	0.218019	0	0	3.60577	10.7949	STAT1;UBC;SQSTM1
Human enterovirus C102 vp1	3/40	0.0500973	0.217878	0	0	3.60577	10.7949	STAT1;UBC;ICAM1
Human enterovirus C102 vp2	3/40	0.0500973	0.217737	0	0	3.60577	10.7949	STAT1;CFB;ICAM1
Human papillomavirus type 97 E2 protein	3/40	0.0500973	0.217596	0	0	3.60577	10.7949	STAT1;PABPC1;DYNLL1
Human rhinovirus A22 1C	3/40	0.0500973	0.217455	0	0	3.60577	10.7949	HSPA5;STAT1;ICAM1
Langat virus membrane-associated glycoprotein precursor	3/40	0.0500973	0.217315	0	0	3.60577	10.7949	HSPA5;STAT1;UBC
Macacine alphaherpesvirus 1 deoxyuridine triphosphatase (gene: UL50)	3/40	0.0500973	0.217175	0	0	3.60577	10.7949	STAT1;UBC;SQSTM1
Norovirus Hu/GII.4/Randwick/NSW882J/2011/AU VP1	3/40	0.0500973	0.217034	0	0	3.60577	10.7949	HSPA5;STAT1;FLNA
Marburg marburgvirus glycoprotein (gene: GP)	7/160	0.0502271	0.217456	0	0	2.10337	6.29159	HSPA8;TPM4;HSPA5;TPM3;STAT1;UBC;SQSTM1
Human T-cell leukemia virus type I Pr gag-pro (gene: gag-pro)	4/67	0.0508126	0.219849	0	0	2.87026	8.55227	HSPA8;HSP90AB1;STAT1;SQSTM1
Monkeypox virus TNF-alpha-receptor-like protein	4/67	0.0508126	0.219708	0	0	2.87026	8.55227	CCL7;STAT1;CCL5;CCL2
Human T-lymphotropic virus 2 Gag-Pro-Pol	6/128	0.051273	0.221556	0	0	2.25361	6.69454	HSPA8;HSP90AB1;STAT1;UBC;SQSTM1;RPL6
Human adenovirus 31 cr1 beta protein (gene: E3 cr1 beta)	19/607	0.0513438	0.221719	0	0	1.50488	4.4683	CD274;VWF;HSPA5;STAT1;ISG15;PTPRF;ICAM1;VEGFA;PTPRB;UBB;UBC;FLNA;RPL13;COL6A3;MYH9;IGFBP7;MFGE8;UBA52;SQSTM1
Cercopithecine betaherpesvirus 5 membrane protein US12E (gene: US12E)	2/18	0.0530259	0.228836	0	0	5.34188	15.689	STAT1;UBC
Coxsackievirus A18 2A protein	2/18	0.0530259	0.228689	0	0	5.34188	15.689	HSPA5;STAT1
Coxsackievirus A6 VP3 protein	2/18	0.0530259	0.228542	0	0	5.34188	15.689	STAT1;ICAM1
Cyclovirus TN25 capsid protein (gene: cap)	2/18	0.0530259	0.228396	0	0	5.34188	15.689	STAT1;SQSTM1
Echovirus E12 polyprotein region 2	2/18	0.0530259	0.228249	0	0	5.34188	15.689	STAT1;UBC
Encephalomyocarditis virus protein 3C	2/18	0.0530259	0.228103	0	0	5.34188	15.689	STAT1;SQSTM1
Great Island virus VP7	2/18	0.0530259	0.227957	0	0	5.34188	15.689	STAT1;FLNA
Horsepox virus HSPV082 (Glutaredoxin-like protein; Provisional)	2/18	0.0530259	0.227811	0	0	5.34188	15.689	STAT1;SQSTM1
Human adenovirus 1 protease	2/18	0.0530259	0.227666	0	0	5.34188	15.689	STAT1;UBC
Human adenovirus 17 protease	2/18	0.0530259	0.22752	0	0	5.34188	15.689	STAT1;UBC
Human adenovirus 2 protease	2/18	0.0530259	0.227375	0	0	5.34188	15.689	STAT1;UBC
Human adenovirus 36 E4 ORF3	2/18	0.0530259	0.22723	0	0	5.34188	15.689	STAT1;SQSTM1
Human adenovirus 58 ORF3 (gene: E4)	2/18	0.0530259	0.227085	0	0	5.34188	15.689	STAT1;SQSTM1
Human adenovirus 6 adenain endoprotease 23 kDa protein (gene: L3)	2/18	0.0530259	0.22694	0	0	5.34188	15.689	STAT1;UBC
Human betaherpesvirus 5 regulatory protein IE1 (gene: UL123)	2/18	0.0530259	0.226796	0	0	5.34188	15.689	STAT1;DYNLL1
Human mastadenovirus C protease (gene: L3)	2/18	0.0530259	0.226651	0	0	5.34188	15.689	STAT1;UBC
Human papillomavirus type 106 E1 protein	2/18	0.0530259	0.226507	0	0	5.34188	15.689	STAT1;SQSTM1
Human papillomavirus type 90 putative replication protein E1 (gene: E1)	2/18	0.0530259	0.226363	0	0	5.34188	15.689	STAT1;SQSTM1
Human parechovirus 8 VP3	2/18	0.0530259	0.226219	0	0	5.34188	15.689	STAT1;PABPC1
Human rhinovirus A62 2C	2/18	0.0530259	0.226076	0	0	5.34188	15.689	STAT1;UBC
Human rhinovirus A77 2C	2/18	0.0530259	0.225932	0	0	5.34188	15.689	STAT1;UBC
Molluscum contagiosum virus subtype 1 MC026L (gene: MC026L)	2/18	0.0530259	0.225789	0	0	5.34188	15.689	STAT1;UBC
Monkeypox virus Toll/IL1-receptor [TIR]-like protein	2/18	0.0530259	0.225646	0	0	5.34188	15.689	HSPA5;STAT1
Monkeypox virus Zaire-96-I-16 A47R (gene: A47R)	2/18	0.0530259	0.225503	0	0	5.34188	15.689	HSPA5;STAT1
Orf virus ORF043 hypothetical protein	2/18	0.0530259	0.22536	0	0	5.34188	15.689	STAT1;UBC
Reston ebolavirus minor nucleoprotein (gene: VP30)	2/18	0.0530259	0.225218	0	0	5.34188	15.689	STAT1;UBC
Reston ebolavirus - Reston VP30 (gene: VP30)	2/18	0.0530259	0.225075	0	0	5.34188	15.689	STAT1;UBC
Human adenovirus 21 maturation protein IVa2 (gene: IVa2)	4/68	0.05314	0.225417	0	0	2.82805	8.29984	UBB;STAT1;UBC;SQSTM1
Coxsackievirus B5 VP2 capsid protein, polyprotein region 3 (gene: 1A)	3/41	0.0532485	0.225735	0	0	3.51782	10.317	STAT1;CFB;ICAM1
Echovirus E11 1B(VP2)	3/41	0.0532485	0.225592	0	0	3.51782	10.317	STAT1;CFB;ICAM1
Human adenovirus 11+34 E4 ORF1 protein (gene: E4)	3/41	0.0532485	0.22545	0	0	3.51782	10.317	STAT1;UBC;SQSTM1
Human adenovirus 22 ORF1 (gene: E4)	3/41	0.0532485	0.225308	0	0	3.51782	10.317	STAT1;UBC;SQSTM1
Human adenovirus 35 E4 ORF1	3/41	0.0532485	0.225166	0	0	3.51782	10.317	STAT1;UBC;SQSTM1
Human adenovirus 56 Orf 1 protein (gene: E4)	3/41	0.0532485	0.225024	0	0	3.51782	10.317	STAT1;UBC;SQSTM1
Human enterovirus C104 VP2	3/41	0.0532485	0.224883	0	0	3.51782	10.317	STAT1;CFB;ICAM1
Human papillomavirus type 115 early protein E7 (gene: E7)	3/41	0.0532485	0.224742	0	0	3.51782	10.317	STAT1;UBC;SQSTM1
Influenza A virus (A/Shanghai/02/2013(H7N9)) HA2 (gene: HA)	3/41	0.0532485	0.2246	0	0	3.51782	10.317	TPM4;STAT1;PABPC1
Molluscum contagiosum virus subtype 1 MC003L (gene: MC003L)	3/41	0.0532485	0.224459	0	0	3.51782	10.317	HSP90AB1;HSPA5;STAT1
Norovirus Hu/GII.3/Jingzhou/2013402/CHN nonstructural protein	3/41	0.0532485	0.224319	0	0	3.51782	10.317	HSP90AB1;STAT1;SQSTM1
Norovirus Hu/GII.4/NIHIC18.1/2012/USA protein p48 (gene: POL)	3/41	0.0532485	0.224178	0	0	3.51782	10.317	HSP90AB1;HSPA5;STAT1
Norovirus Hu/GII.4/NIHIC27.1/2012/USA protein p48 (gene: POL)	3/41	0.0532485	0.224037	0	0	3.51782	10.317	HSP90AB1;HSPA5;STAT1
Norovirus Hu/GII.4/NIHIC27.2/2012/USA protein p48 (gene: POL)	3/41	0.0532485	0.223897	0	0	3.51782	10.317	HSP90AB1;HSPA5;STAT1
Norovirus Hu/GII/BG1C0241-33/2011/BGD protein p48 (gene: POL)	3/41	0.0532485	0.223757	0	0	3.51782	10.317	HSP90AB1;HSPA5;STAT1
Macacine alphaherpesvirus 1 envelope glycoprotein C (gene: UL44)	8/197	0.0543062	0.228059	0	0	1.95236	5.68746	C3;PTPRB;HSPA5;STAT1;UBC;FLNA;IGFBP7;TAPBP
Human gammaherpesvirus 8 KCP (gene: ORF4)	4/69	0.0555246	0.23303	0	0	2.78707	8.05721	C3;STAT1;SQSTM1;CFB
Human papillomavirus type 45 early protein (gene: E2)	4/69	0.0555246	0.232884	0	0	2.78707	8.05721	STAT1;RPS20;PABPC1;DYNLL1
Human rhinovirus A39 full_polyprotein 1..2157	4/69	0.0555246	0.232739	0	0	2.78707	8.05721	HSPA5;STAT1;SQSTM1;ICAM1
Cowpox virus CPXV093 protein (gene: CPXV093 CDS)	3/42	0.0564928	0.236649	0	0	3.43407	9.86828	STAT1;UBC;SQSTM1
Coxsackievirus A13 vp2	3/42	0.0564928	0.236502	0	0	3.43407	9.86828	STAT1;CFB;ICAM1
Coxsackievirus A18 VP1 protein	3/42	0.0564928	0.236355	0	0	3.43407	9.86828	STAT1;UBC;ICAM1
Ectromelia virus ERPV RNA polymerase 7 subunit	3/42	0.0564928	0.236207	0	0	3.43407	9.86828	STAT1;UBC;SQSTM1
Enterovirus B 1B(VP2)	3/42	0.0564928	0.23606	0	0	3.43407	9.86828	STAT1;CFB;ICAM1
Horsepox virus HSPV084 (DNA-dependent RNA polymerase subunit; Provisional)	3/42	0.0564928	0.235914	0	0	3.43407	9.86828	STAT1;UBC;SQSTM1
Human adenovirus 11a E4 ORF1 protein	3/42	0.0564928	0.235767	0	0	3.43407	9.86828	STAT1;UBC;SQSTM1
Human adenovirus 14 Orf1 protein (gene: E4)	3/42	0.0564928	0.23562	0	0	3.43407	9.86828	STAT1;UBC;SQSTM1
Human adenovirus 21 14.2 kDa protein (gene: E4)	3/42	0.0564928	0.235474	0	0	3.43407	9.86828	STAT1;UBC;SQSTM1
Human adenovirus 21a 14.2 kDa protein (gene: E4)	3/42	0.0564928	0.235328	0	0	3.43407	9.86828	STAT1;UBC;SQSTM1
Human adenovirus 3+7 ORF1 (gene: E4)	3/42	0.0564928	0.235182	0	0	3.43407	9.86828	STAT1;UBC;SQSTM1
Human adenovirus 43 hypothetical protein (gene: E4)	3/42	0.0564928	0.235037	0	0	3.43407	9.86828	STAT1;UBC;SQSTM1
Human adenovirus 50 Orf1 protein (gene: E4)	3/42	0.0564928	0.234891	0	0	3.43407	9.86828	STAT1;UBC;SQSTM1
Human adenovirus 55 E4 ORF1 14.2 kDa protein	3/42	0.0564928	0.234746	0	0	3.43407	9.86828	STAT1;UBC;SQSTM1
Human adenovirus 66 ORF1 (gene: E4)	3/42	0.0564928	0.2346	0	0	3.43407	9.86828	STAT1;UBC;SQSTM1
Human adenovirus 7 E4 ORF1	3/42	0.0564928	0.234455	0	0	3.43407	9.86828	STAT1;UBC;SQSTM1
Human adenovirus 7d2 ORF1 (gene: E4)	3/42	0.0564928	0.234311	0	0	3.43407	9.86828	STAT1;UBC;SQSTM1
Human adenovirus B3 E4 ORF1 (gene: E4)	3/42	0.0564928	0.234166	0	0	3.43407	9.86828	STAT1;UBC;SQSTM1
Human adenovirus E4 E4 13.5 kDa protein	3/42	0.0564928	0.234022	0	0	3.43407	9.86828	STAT1;UBC;SQSTM1
Human mastadenovirus E control protein E4orf1 (gene: E4)	3/42	0.0564928	0.233877	0	0	3.43407	9.86828	STAT1;UBC;SQSTM1
Influenza A virus (A/California/04/2009(H1N1)) polymerase PB1 (gene: PB1)	3/42	0.0564928	0.233733	0	0	3.43407	9.86828	HSPA8;HSPA5;STAT1
Influenza A virus (A/California/07/2009(H1N1)) polymerase PB1 (gene: PB1)	3/42	0.0564928	0.233589	0	0	3.43407	9.86828	HSPA8;HSPA5;STAT1
Influenza A virus (A/Korea/426/1968(H2N2)) PB1 polymerase subunit (gene: PB1)	3/42	0.0564928	0.233446	0	0	3.43407	9.86828	HSPA8;HSPA5;STAT1
Influenza A virus (A/New York/392/2004(H3N2)) polymerase PB1 (gene: PB1)	3/42	0.0564928	0.233302	0	0	3.43407	9.86828	HSPA8;HSPA5;STAT1
Influenza A virus (A/New York/599/1996(H3N2)) polymerase PB1 (gene: PB1)	3/42	0.0564928	0.233159	0	0	3.43407	9.86828	HSPA8;HSPA5;STAT1
Influenza A virus (A/New York/602/1996(H3N2)) polymerase PB1 (gene: PB1)	3/42	0.0564928	0.233015	0	0	3.43407	9.86828	HSPA8;HSPA5;STAT1
Influenza A virus (A/Northern Territory/60/1968(H3N2)) polymerase PB1 (gene: PB1)	3/42	0.0564928	0.232872	0	0	3.43407	9.86828	HSPA8;HSPA5;STAT1
Influenza A virus (A/Puerto Rico/8/1934(H1N1)) polymerase PB1 (gene: PB1)	3/42	0.0564928	0.232729	0	0	3.43407	9.86828	HSPA8;HSPA5;STAT1
Influenza A virus (A/Shanghai/02/2013(H7N9)) polymerase PB1 (gene: PB1)	3/42	0.0564928	0.232587	0	0	3.43407	9.86828	HSPA8;HSPA5;STAT1
Influenza A virus (A/goose/Guangdong/1/1996(H5N1)) polymerase (gene: PB1)	3/42	0.0564928	0.232444	0	0	3.43407	9.86828	HSPA8;HSPA5;STAT1
Monkeypox virus DNA-dependent RNA polymerase subunit rpo7	3/42	0.0564928	0.232302	0	0	3.43407	9.86828	STAT1;UBC;SQSTM1
Monkeypox virus Zaire-96-I-16 RNA polymerase (gene: G6R)	3/42	0.0564928	0.23216	0	0	3.43407	9.86828	STAT1;UBC;SQSTM1
Norovirus Hu/GII.3/CBNU1/2006/KOR full_polyprotein 1..1699	3/42	0.0564928	0.232018	0	0	3.43407	9.86828	HSP90AB1;STAT1;SQSTM1
Norovirus Hu/GII.4/NIHIC13/2011/USA protein p48 (gene: POL)	3/42	0.0564928	0.231876	0	0	3.43407	9.86828	HSP90AB1;HSPA5;STAT1
Norovirus Hu/GII/BG1C0270/2011/BGD protein p48 (gene: POL)	3/42	0.0564928	0.231734	0	0	3.43407	9.86828	HSP90AB1;HSPA5;STAT1
Norovirus Hu/GII/BG1C0317/2011/BGD protein p48 (gene: POL)	3/42	0.0564928	0.231593	0	0	3.43407	9.86828	HSP90AB1;HSPA5;STAT1
Papiine alphaherpesvirus 2 membrane protein UL45 (gene: UL45)	3/42	0.0564928	0.231451	0	0	3.43407	9.86828	HSP90AB1;HSPA5;STAT1
Vaccinia virus RNA polymerase (gene: G5.5R)	3/42	0.0564928	0.23131	0	0	3.43407	9.86828	STAT1;UBC;SQSTM1
Vaccinia virus putative ATPase (gene: A32L)	3/42	0.0564928	0.231169	0	0	3.43407	9.86828	STAT1;UBC;SQSTM1
Vaccinia virus Ankara RNA polymerase subunit rpo7	3/42	0.0564928	0.231029	0	0	3.43407	9.86828	STAT1;UBC;SQSTM1
Vaccinia virus kelch-like protein (gene: A55R)	8/199	0.0569515	0.232763	0	0	1.93274	5.53838	LGALS3BP;HSPA8;HSP90AB1;HSPA5;STAT1;UBC;ISG15;SQSTM1
HBV genotype B C protein (gene: C)	4/70	0.0579661	0.236765	0	0	2.74725	7.82389	HSPA8;HSPA5;STAT1;UBC
Papiine alphaherpesvirus 2 envelope glycoprotein C (gene: UL44)	11/308	0.0582963	0.237969	0	0	1.71703	4.88018	CD274;HSPA5;VWF;STAT1;UBC;FLNA;COL6A3;ISG15;MFGE8;SQSTM1;VEGFA
Cercopithecine alphaherpesvirus 2 ribonucleotide reductase subunit 2 (gene: UL40)	2/19	0.0584692	0.23853	0	0	5.06073	14.3687	STAT1;FTH1
Cercopithecine betaherpesvirus 5 membrane protein UL14 (gene: UL14)	2/19	0.0584692	0.238385	0	0	5.06073	14.3687	STAT1;UBC
Coxsackievirus A12 VP4 protein	2/19	0.0584692	0.238241	0	0	5.06073	14.3687	UBC;SQSTM1
Human adenovirus 1 pVI	2/19	0.0584692	0.238096	0	0	5.06073	14.3687	STAT1;UBC
Human adenovirus 18 protease protein (gene: L3)	2/19	0.0584692	0.237952	0	0	5.06073	14.3687	STAT1;UBC
Human adenovirus 41 E4 hypothetical protein 3	2/19	0.0584692	0.237808	0	0	5.06073	14.3687	STAT1;CTSD
Human adenovirus 5 pVI	2/19	0.0584692	0.237664	0	0	5.06073	14.3687	STAT1;UBC
Human adenovirus 6 minor capsid protein precursor pVI (gene: L3)	2/19	0.0584692	0.23752	0	0	5.06073	14.3687	STAT1;UBC
Human coronavirus OC43 nsp6 (gene: orf1ab)	2/19	0.0584692	0.237377	0	0	5.06073	14.3687	STAT1;SQSTM1
Human papillomavirus 120 putative E1 protein (gene: E1)	2/19	0.0584692	0.237233	0	0	5.06073	14.3687	STAT1;SQSTM1
Human papillomavirus 120 replication protein E1 (gene: E1)	2/19	0.0584692	0.23709	0	0	5.06073	14.3687	STAT1;SQSTM1
Human rhinovirus A55 2C (P2-C)	2/19	0.0584692	0.236947	0	0	5.06073	14.3687	STAT1;UBC
Human rhinovirus A58 2C	2/19	0.0584692	0.236804	0	0	5.06073	14.3687	STAT1;UBC
Human rhinovirus QCE VP1	2/19	0.0584692	0.236661	0	0	5.06073	14.3687	STAT1;ICAM1
Norovirus Hu/GI/10360/2010/VNM 3C-like protease (gene: POL)	2/19	0.0584692	0.236519	0	0	5.06073	14.3687	HSP90AB1;STAT1
Rhinovirus A81 1D	2/19	0.0584692	0.236376	0	0	5.06073	14.3687	STAT1;ICAM1
Sosuga virus V protein	2/19	0.0584692	0.236234	0	0	5.06073	14.3687	STAT1;UBC
Vaccinia virus putative alpha aminitin-sensitive protein (gene: N2L)	2/19	0.0584692	0.236092	0	0	5.06073	14.3687	HSPA5;STAT1
Vaccinia virus Ankara 19.0k hypothetical protein	2/19	0.0584692	0.23595	0	0	5.06073	14.3687	STAT1;UBC
Vaccinia virus Ankara dUTPase	2/19	0.0584692	0.235808	0	0	5.06073	14.3687	STAT1;SQSTM1
West Nile virus lineage 1 membrane glycoprotein precursor M (gene: flavivirus polyprotein)	2/19	0.0584692	0.235667	0	0	5.06073	14.3687	STAT1;UBC
West Nile virus lineage 2 membrane glycoprotein precursor M (gene: flavivirus polyprotein)	2/19	0.0584692	0.235525	0	0	5.06073	14.3687	STAT1;UBC
Cowpox virus CPXV202 protein (gene: CPXV202 CDS)	3/43	0.0598288	0.240857	0	0	3.3542	9.44634	STAT1;UBC;SQSTM1
Echovirus E19 VP1	3/43	0.0598288	0.240713	0	0	3.3542	9.44634	STAT1;UBC;ICAM1
Human mastadenovirus B control protein E4orf1 (gene: E4)	3/43	0.0598288	0.240569	0	0	3.3542	9.44634	STAT1;UBC;SQSTM1
Human papillomavirus 179 E2 protein (gene: E2)	3/43	0.0598288	0.240425	0	0	3.3542	9.44634	STAT1;RPS20;PABPC1
Human parechovirus 4 3D	3/43	0.0598288	0.240281	0	0	3.3542	9.44634	STAT1;UBC;SQSTM1
Human parechovirus 6 3D	3/43	0.0598288	0.240138	0	0	3.3542	9.44634	STAT1;UBC;SQSTM1
Human rhinovirus B5 1B	3/43	0.0598288	0.239994	0	0	3.3542	9.44634	STAT1;CFB;ICAM1
Macacine alphaherpesvirus 1 membrane protein UL45 (gene: UL45)	3/43	0.0598288	0.239851	0	0	3.3542	9.44634	HSP90AB1;HSPA5;STAT1
Norovirus Hu/GII/Seoul1055/KOR/2010 nonstructural protein	3/43	0.0598288	0.239708	0	0	3.3542	9.44634	HSP90AB1;STAT1;SQSTM1
Norovirus Hu/Norwalk/10238/2009/VNM protein p48 (gene: POL)	3/43	0.0598288	0.239565	0	0	3.3542	9.44634	HSP90AB1;HSPA5;STAT1
Parvovirus NIH-CQV putative replication associated protein (gene: rep)	3/43	0.0598288	0.239422	0	0	3.3542	9.44634	STAT1;UBC;SQSTM1
Yaba monkey tumor virus 87R	3/43	0.0598288	0.239279	0	0	3.3542	9.44634	STAT1;UBC;SQSTM1
Hepatitis C virus subtype 3g full_polyprotein 1..3022	4/71	0.0604641	0.241676	0	0	2.70856	7.59942	HSPA8;HSPA5;STAT1;UBC
Human Respiratory syncytial virus 9320 F	4/71	0.0604641	0.241533	0	0	2.70856	7.59942	STAT1;PABPC1;RPS2;SQSTM1
HBV genotype C C protein (gene: C)	4/72	0.0630184	0.251587	0	0	2.67094	7.38336	HSPA8;HSPA5;STAT1;UBC
Influenza A virus (A/New York/599/1996(H3N2)) hemagglutinin (gene: HA)	4/72	0.0630184	0.251437	0	0	2.67094	7.38336	CD274;TPM4;STAT1;UBC
Human adenovirus 6 unknown	3/44	0.0632551	0.252231	0	0	3.27797	9.0491	HSP90AB1;STAT1;SQSTM1
Human enterovirus 79 1D (VP1)	3/44	0.0632551	0.252082	0	0	3.27797	9.0491	STAT1;UBC;ICAM1
Human parechovirus 2 full_polyprotein 1..2179	3/44	0.0632551	0.251932	0	0	3.27797	9.0491	STAT1;UBC;SQSTM1
Human rhinovirus B83 1C	3/44	0.0632551	0.251783	0	0	3.27797	9.0491	STAT1;DYNLL1;ICAM1
Influenza A virus (A/Puerto Rico/8/1934(H1N1)) HA1 (gene: HA)	3/44	0.0632551	0.251634	0	0	3.27797	9.0491	TPM4;GBP2;GBP4
Norovirus Hu/GII-4/CGMH26/2010/TW full_polyprotein 1..1699	3/44	0.0632551	0.251485	0	0	3.27797	9.0491	HSP90AB1;STAT1;SQSTM1
Norovirus Hu/GII.4/Berowra/NSW767L/2012/AU full_polyprotein 1..1699	3/44	0.0632551	0.251336	0	0	3.27797	9.0491	HSP90AB1;STAT1;SQSTM1
Norovirus Hu/GII.4/GZ2010-L87/Guangzhou/CHN/2011 full_polyprotein 1..1699	3/44	0.0632551	0.251187	0	0	3.27797	9.0491	HSP90AB1;STAT1;SQSTM1
Norovirus Hu/GII.4/NIHIC11.3/2013/USA protein p48 (gene: POL)	3/44	0.0632551	0.251039	0	0	3.27797	9.0491	HSP90AB1;HSPA5;STAT1
Norovirus Hu/Norwalk/20066/2009/VNM protein p48 (gene: POL)	3/44	0.0632551	0.250891	0	0	3.27797	9.0491	HSP90AB1;HSPA5;STAT1
Yaba-like disease virus 35L protein (gene: 35L)	3/44	0.0632551	0.250742	0	0	3.27797	9.0491	HSP90AB1;HSPA5;STAT1
Cercopithecine betaherpesvirus 5 membrane protein US18 (gene: US18)	2/20	0.0640959	0.253926	0	0	4.80769	13.2085	STAT1;UBC
Coxsackievirus A8 2C protein	2/20	0.0640959	0.253776	0	0	4.80769	13.2085	STAT1;UBC
Ectromelia virus ERPV host range virulence factor	2/20	0.0640959	0.253626	0	0	4.80769	13.2085	HSPA8;STAT1
Enterovirus A protein 2C	2/20	0.0640959	0.253477	0	0	4.80769	13.2085	STAT1;UBC
Hepatitis C virus subtype 1b p7 protein	2/20	0.0640959	0.253328	0	0	4.80769	13.2085	HSPA8;STAT1
Horsepox virus HSPV009 (Hypothetical protein)	2/20	0.0640959	0.253179	0	0	4.80769	13.2085	STAT1;CCL5
Human adenovirus 1 pIIIa	2/20	0.0640959	0.25303	0	0	4.80769	13.2085	STAT1;UBC
Human adenovirus 18 DNA binding protein (gene: E2A)	2/20	0.0640959	0.252881	0	0	4.80769	13.2085	STAT1;UBC
Human adenovirus 19 ORF3 (gene: E4)	2/20	0.0640959	0.252733	0	0	4.80769	13.2085	STAT1;SQSTM1
Human adenovirus 2 pIIIa	2/20	0.0640959	0.252585	0	0	4.80769	13.2085	STAT1;UBC
Human adenovirus 2 pVI	2/20	0.0640959	0.252436	0	0	4.80769	13.2085	STAT1;UBC
Human adenovirus 5 pIIIa	2/20	0.0640959	0.252288	0	0	4.80769	13.2085	STAT1;UBC
Human adenovirus 6 peripentonal hexon-associated pIIIa protein (gene: L1)	2/20	0.0640959	0.252141	0	0	4.80769	13.2085	STAT1;UBC
Human adenovirus 66 peripentonal hexon associated protein IIIa precursor (gene: L1)	2/20	0.0640959	0.251993	0	0	4.80769	13.2085	STAT1;UBC
Human adenovirus 7d2 peripentonal hexon associated protein IIIa precursor (gene: L1)	2/20	0.0640959	0.251846	0	0	4.80769	13.2085	STAT1;UBC
Human adenovirus B3 L1 protein pIIIa (gene: L1)	2/20	0.0640959	0.251698	0	0	4.80769	13.2085	STAT1;UBC
Human betaherpesvirus 5 envelope protein UL78 (gene: UL78)	2/20	0.0640959	0.251551	0	0	4.80769	13.2085	STAT1;UBC
Human gammaherpesvirus 4 capsid protein VP26 (gene: BFRF3)	2/20	0.0640959	0.251404	0	0	4.80769	13.2085	STAT1;UBC
Human herpesvirus 4 type 2 BFRF3	2/20	0.0640959	0.251257	0	0	4.80769	13.2085	STAT1;UBC
Human mastadenovirus C capsid protein precursor pVI (gene: L3)	2/20	0.0640959	0.251111	0	0	4.80769	13.2085	STAT1;UBC
Human mastadenovirus C capsid protein precursor pIIIa (gene: L1)	2/20	0.0640959	0.250964	0	0	4.80769	13.2085	STAT1;UBC
Human papillomavirus 130 E7 (gene: E7)	2/20	0.0640959	0.250818	0	0	4.80769	13.2085	UBC;SQSTM1
Human polyomavirus 10 VP1	2/20	0.0640959	0.250672	0	0	4.80769	13.2085	HSPA5;STAT1
Human rhinovirus A31 2C	2/20	0.0640959	0.250526	0	0	4.80769	13.2085	STAT1;UBC
Junin mammarenavirus Z protein	2/20	0.0640959	0.25038	0	0	4.80769	13.2085	STAT1;GSTP1
MX polyomavirus VP1	2/20	0.0640959	0.250235	0	0	4.80769	13.2085	HSPA5;STAT1
Macacine alphaherpesvirus 1 ribonucleotide reductase subunit 2 (gene: UL40)	2/20	0.0640959	0.250089	0	0	4.80769	13.2085	STAT1;FTH1
Molluscum contagiosum virus subtype 1 MC040R (gene: MC040R)	2/20	0.0640959	0.249944	0	0	4.80769	13.2085	HSPA5;STAT1
Rhinovirus C capsid protein VP1	2/20	0.0640959	0.249799	0	0	4.80769	13.2085	STAT1;ICAM1
Saffold virus capsid protein VP2	2/20	0.0640959	0.249654	0	0	4.80769	13.2085	STAT1;DYNLL1
Sapovirus Mc10 capsid protein	2/20	0.0640959	0.24951	0	0	4.80769	13.2085	HSPA5;STAT1
Vaccinia virus Ankara Interleukin-1 beta receptor	7/170	0.0652257	0.25376	0	0	1.97964	5.40422	PTPRB;HSPA5;STAT1;UBC;FLNA;IGFBP7;VEGFA
Yaba-like disease virus 140R protein (gene: 140R)	8/205	0.0653717	0.254181	0	0	1.87617	5.11757	LGALS3BP;HSPA8;HSPA5;STAT1;RPL23;UBC;ISG15;SQSTM1
Langat virus envelope membrane-associated glycoprotein	4/73	0.0656287	0.255033	0	0	2.63435	7.1753	HSPA8;HSP90AB1;STAT1;RPL13
Respiratory syncytial virus Fusion protein (F) (gene: F)	4/73	0.0656287	0.254885	0	0	2.63435	7.1753	STAT1;PABPC1;RPS2;SQSTM1
Respiratory syncytial virus type A fusion protein (gene: F)	4/73	0.0656287	0.254738	0	0	2.63435	7.1753	STAT1;PABPC1;RPS2;SQSTM1
Echovirus E19 VP2	3/45	0.0667702	0.259019	0	0	3.20513	8.67467	STAT1;CFB;ICAM1
Human adenovirus 16 ORF1 (gene: E4)	3/45	0.0667702	0.25887	0	0	3.20513	8.67467	STAT1;UBC;SQSTM1
Human papillomavirus 105 E7 protein (gene: E7)	3/45	0.0667702	0.25872	0	0	3.20513	8.67467	GSTP1;UBC;SQSTM1
MW polyomavirus large T antigen	3/45	0.0667702	0.258571	0	0	3.20513	8.67467	HSPA8;STAT1;UBC
Norovirus GII.17 AKB94549.1 full_polyprotein 1..1702 (gene: ORF1)	3/45	0.0667702	0.258422	0	0	3.20513	8.67467	HSP90AB1;STAT1;SQSTM1
Norovirus Hu/GII-4/CGMH23/2010/TW full_polyprotein 1..1699	3/45	0.0667702	0.258273	0	0	3.20513	8.67467	HSP90AB1;STAT1;SQSTM1
Norovirus Hu/GII-4/CGMH25/2010/TW full_polyprotein 1..1699	3/45	0.0667702	0.258124	0	0	3.20513	8.67467	HSP90AB1;STAT1;SQSTM1
Norovirus Hu/Norwalk/10051/2009/VNM protein p48 (gene: POL)	3/45	0.0667702	0.257976	0	0	3.20513	8.67467	HSP90AB1;HSPA5;STAT1
Norovirus Hu/Norwalk/10110/2009/VNM protein p48 (gene: POL)	3/45	0.0667702	0.257828	0	0	3.20513	8.67467	HSP90AB1;HSPA5;STAT1
Norovirus Hu/Norwalk/10136/2009/VNM protein p48 (gene: POL)	3/45	0.0667702	0.257679	0	0	3.20513	8.67467	HSP90AB1;HSPA5;STAT1
Norovirus Hu/Norwalk/10199/2009/VNM protein p48 (gene: POL)	3/45	0.0667702	0.257531	0	0	3.20513	8.67467	HSP90AB1;HSPA5;STAT1
Norovirus Hu/Norwalk/10203/2009/VNM protein p48 (gene: POL)	3/45	0.0667702	0.257384	0	0	3.20513	8.67467	HSP90AB1;HSPA5;STAT1
Norovirus Hu/Norwalk/10204/2009/VNM protein p48 (gene: POL)	3/45	0.0667702	0.257236	0	0	3.20513	8.67467	HSP90AB1;HSPA5;STAT1
Norovirus Hu/Norwalk/10223/2009/VNM protein p48 (gene: POL)	3/45	0.0667702	0.257088	0	0	3.20513	8.67467	HSP90AB1;HSPA5;STAT1
Norovirus Hu/Norwalk/10236/2009/VNM protein p48 (gene: POL)	3/45	0.0667702	0.256941	0	0	3.20513	8.67467	HSP90AB1;HSPA5;STAT1
Norovirus Hu/Norwalk/10247/2009/VNM protein p48 (gene: POL)	3/45	0.0667702	0.256794	0	0	3.20513	8.67467	HSP90AB1;HSPA5;STAT1
Norovirus Hu/Norwalk/20010/2009/VNM protein p48 (gene: POL)	3/45	0.0667702	0.256647	0	0	3.20513	8.67467	HSP90AB1;HSPA5;STAT1
Norovirus Hu/Norwalk/20014/2009/VNM protein p48 (gene: POL)	3/45	0.0667702	0.2565	0	0	3.20513	8.67467	HSP90AB1;HSPA5;STAT1
Norovirus Hu/Norwalk/20016/2009/VNM protein p48 (gene: POL)	3/45	0.0667702	0.256353	0	0	3.20513	8.67467	HSP90AB1;HSPA5;STAT1
Norovirus Hu/Norwalk/20033/2009/VNM protein p48 (gene: POL)	3/45	0.0667702	0.256207	0	0	3.20513	8.67467	HSP90AB1;HSPA5;STAT1
Norovirus Hu/Norwalk/20035/2009/VNM protein p48 (gene: POL)	3/45	0.0667702	0.256061	0	0	3.20513	8.67467	HSP90AB1;HSPA5;STAT1
Norovirus Hu/Norwalk/20067/2009/VNM protein p48 (gene: POL)	3/45	0.0667702	0.255914	0	0	3.20513	8.67467	HSP90AB1;HSPA5;STAT1
Norovirus Hu/Norwalk/20123/2009/VNM protein p48 (gene: POL)	3/45	0.0667702	0.255768	0	0	3.20513	8.67467	HSP90AB1;HSPA5;STAT1
Norovirus Hu/Norwalk/20128/2009/VNM protein p48 (gene: POL)	3/45	0.0667702	0.255623	0	0	3.20513	8.67467	HSP90AB1;HSPA5;STAT1
Norovirus Hu/Norwalk/20142/2009/VNM protein p48 (gene: POL)	3/45	0.0667702	0.255477	0	0	3.20513	8.67467	HSP90AB1;HSPA5;STAT1
Orf virus ORF042 RNA polymerase subunit RPO7	3/45	0.0667702	0.255331	0	0	3.20513	8.67467	DAXX;UBC;SQSTM1
Variola virus hypothetical protein (gene: B9R)	3/45	0.0667702	0.255186	0	0	3.20513	8.67467	STAT1;UBC;SQSTM1
Horsepox virus HSPV078 (RNA helicase NPH-II)	4/74	0.0682945	0.260863	0	0	2.59875	6.97486	HSPA8;DDX5;STAT1;PABPC1
Human papillomavirus type 34 early protein (gene: E7)	4/74	0.0682945	0.260715	0	0	2.59875	6.97486	GSTP1;UBC;RPS20;SQSTM1
Variola virus RNA helicase NPH-II (gene: K8R)	4/74	0.0682945	0.260567	0	0	2.59875	6.97486	DDX17;DDX5;STAT1;PABPC1
Yaba monkey tumor virus RNA helicase NPH-II	4/74	0.0682945	0.260419	0	0	2.59875	6.97486	DDX17;DDX5;STAT1;UBC
Human adenovirus 19 CR1-beta (gene: E3)	8/207	0.0683411	0.260449	0	0	1.85805	4.98559	EEF1A1;PTPRB;STAT1;UBC;IGFBP7;PTPRF;ICAM1;VEGFA
Human adenovirus D8 45.5kDa protein (gene: E3)	7/172	0.068518	0.260975	0	0	1.95662	5.24503	STAT1;UBC;FLNA;IGFBP7;DYNLL1;SQSTM1;PTPRF
Cercopithecine alphaherpesvirus 2 DNA polymerase processivity subunit (gene: UL42)	2/21	0.069896	0.266072	0	0	4.57875	12.1829	STAT1;UBC
Cosavirus A VP1	2/21	0.069896	0.265922	0	0	4.57875	12.1829	STAT1;ICAM1
Cowpox virus CPXV049 protein (gene: CPXV049 CDS)	2/21	0.069896	0.265771	0	0	4.57875	12.1829	STAT1;SQSTM1
Coxsackievirus A6 VP4 protein	2/21	0.069896	0.265621	0	0	4.57875	12.1829	UBC;SQSTM1
Cyclovirus TN18 capsid protein (gene: cap)	2/21	0.069896	0.26547	0	0	4.57875	12.1829	STAT1;SQSTM1
Enterovirus C capsid protein VP1	2/21	0.069896	0.26532	0	0	4.57875	12.1829	STAT1;ICAM1
Enterovirus D capsid protein 1D	2/21	0.069896	0.26517	0	0	4.57875	12.1829	STAT1;ICAM1
Human T-cell leukemia virus type I p19 MA (gene: gag)	2/21	0.069896	0.265021	0	0	4.57875	12.1829	STAT1;UBC
Human adenovirus 16 peripentonal hexon associated protein IIIa precursor (gene: L1)	2/21	0.069896	0.264871	0	0	4.57875	12.1829	STAT1;UBC
Human adenovirus 22 ORF3 (gene: E4)	2/21	0.069896	0.264722	0	0	4.57875	12.1829	STAT1;SQSTM1
Human adenovirus 68 peripentonal hexon associated protein IIIa precursor (gene: L1)	2/21	0.069896	0.264573	0	0	4.57875	12.1829	STAT1;UBC
Human adenovirus 7 pIIIa	2/21	0.069896	0.264423	0	0	4.57875	12.1829	STAT1;UBC
Human adenovirus Chiba_E086/2012 DNA binding protein (gene: E2A)	2/21	0.069896	0.264275	0	0	4.57875	12.1829	UBC;HIST1H2AB
Human gammaherpesvirus 8 ORF65 (gene: ORF65)	2/21	0.069896	0.264126	0	0	4.57875	12.1829	STAT1;UBC
Human mastadenovirus B capsid protein precursor pIIIa (gene: L1)	2/21	0.069896	0.263977	0	0	4.57875	12.1829	STAT1;UBC
Human mastadenovirus F control protein E4orf3 (gene: E4)	2/21	0.069896	0.263829	0	0	4.57875	12.1829	STAT1;CTSD
Human papillomavirus 167 E1 (gene: E1)	2/21	0.069896	0.263681	0	0	4.57875	12.1829	STAT1;SQSTM1
Human papillomavirus 197 E7 (gene: E7)	2/21	0.069896	0.263533	0	0	4.57875	12.1829	UBC;SQSTM1
Human papillomavirus 9 early protein (gene: E7)	2/21	0.069896	0.263385	0	0	4.57875	12.1829	STAT1;SQSTM1
Human rhinovirus A49 1B	2/21	0.069896	0.263237	0	0	4.57875	12.1829	STAT1;ICAM1
Human rhinovirus A80 1D	2/21	0.069896	0.26309	0	0	4.57875	12.1829	STAT1;ICAM1
MW polyomavirus major capsid protein VP1 (gene: VP1)	2/21	0.069896	0.262942	0	0	4.57875	12.1829	HSPA5;STAT1
Monkeypox virus Zaire-96-I-16 host-range protein (gene: D10L)	2/21	0.069896	0.262795	0	0	4.57875	12.1829	HSPA8;STAT1
New Jersey polyomavirus-2013 alternative T antigen	2/21	0.069896	0.262648	0	0	4.57875	12.1829	HSPA8;STAT1
Norovirus Hu/GI.2/Leuven/2003/BEL capsid protein	2/21	0.069896	0.262501	0	0	4.57875	12.1829	STAT1;SQSTM1
Norovirus Hu/GII/BG1C0405/2012/BGD NTPase (gene: POL)	2/21	0.069896	0.262354	0	0	4.57875	12.1829	STAT1;UBC
Reston ebolavirus polymerase complex protein (gene: VP35)	2/21	0.069896	0.262208	0	0	4.57875	12.1829	STAT1;ISG15
STL polyomavirus VP1	2/21	0.069896	0.262061	0	0	4.57875	12.1829	HSPA5;STAT1
Variola virus hypothetical protein (gene: C1L)	2/21	0.069896	0.261915	0	0	4.57875	12.1829	TUBB2A;STAT1
Yaba-like disease virus 87R protein (gene: 87R)	2/21	0.069896	0.261769	0	0	4.57875	12.1829	STAT1;SQSTM1
Cercopithecine alphaherpesvirus 2 large tegument protein (gene: UL36)	3/46	0.0703728	0.263408	0	0	3.13545	8.32133	UBC;ISG15;RPS27A
Dengue virus 2 envelope protein E (gene: flavivirus polyprotein)	3/46	0.0703728	0.263261	0	0	3.13545	8.32133	STAT1;UBC;SQSTM1
Echovirus E15 VP2	3/46	0.0703728	0.263114	0	0	3.13545	8.32133	STAT1;CFB;ICAM1
Gemycircularvirus SL1 replication associated protein	3/46	0.0703728	0.262968	0	0	3.13545	8.32133	STAT1;UBC;SQSTM1
Human enterovirus C118 VP3	3/46	0.0703728	0.262822	0	0	3.13545	8.32133	HSPA5;STAT1;ICAM1
Human immunodeficiency virus 1 Envelope transmembrane domain (gene: env)	3/46	0.0703728	0.262675	0	0	3.13545	8.32133	STAT1;UBC;SQSTM1
Melaka orthoreovirus sigma C	3/46	0.0703728	0.26253	0	0	3.13545	8.32133	CTSL;STAT1;UBC
Norovirus GII/Hu/JP/2012/GII.Pe_GII.4_Sydney2012/Fukuyama/1 full_polyprotein 1..1699	3/46	0.0703728	0.262384	0	0	3.13545	8.32133	HSP90AB1;STAT1;SQSTM1
Norovirus GII/Hu/TW/2012/GII.Pe_GII.4_Sydney2012/Taipei/106 full_polyprotein 1..1699	3/46	0.0703728	0.262238	0	0	3.13545	8.32133	HSP90AB1;STAT1;SQSTM1
Norovirus Hu/GII-4/CGMH20/2009/TW major viral capsid protein (gene: VP1)	3/46	0.0703728	0.262093	0	0	3.13545	8.32133	STAT1;UBC;SQSTM1
Norovirus Hu/GII-4/CGMH24/2010/TW full_polyprotein 1..1699	3/46	0.0703728	0.261947	0	0	3.13545	8.32133	HSP90AB1;STAT1;SQSTM1
Norovirus Hu/GII.4/Jiangsu1/2011/CHN full_polyprotein 1..1699	3/46	0.0703728	0.261802	0	0	3.13545	8.32133	HSP90AB1;STAT1;SQSTM1
Norovirus Hu/GII.4/Jiangsu2/2012/CHN full_polyprotein 1..1699	3/46	0.0703728	0.261657	0	0	3.13545	8.32133	HSP90AB1;STAT1;SQSTM1
Norovirus Hu/GII.4/gg-12-08-04/2012/KR full_polyprotein 1..1699	3/46	0.0703728	0.261513	0	0	3.13545	8.32133	HSP90AB1;STAT1;SQSTM1
Norovirus Hu/GII/10002/2009/VNM protein p48 (gene: POL)	3/46	0.0703728	0.261368	0	0	3.13545	8.32133	HSP90AB1;HSPA5;STAT1
Norovirus Hu/GII/10003/2009/VNM protein p48 (gene: POL)	3/46	0.0703728	0.261223	0	0	3.13545	8.32133	HSP90AB1;HSPA5;STAT1
Norovirus Hu/GII/20477/2010/VNM protein p48 (gene: POL)	3/46	0.0703728	0.261079	0	0	3.13545	8.32133	HSP90AB1;HSPA5;STAT1
Norovirus Hu/Norwalk/10062/2009/VNM protein p48 (gene: POL)	3/46	0.0703728	0.260935	0	0	3.13545	8.32133	HSP90AB1;HSPA5;STAT1
Norovirus Hu/Norwalk/10114/2009/VNM protein p48 (gene: POL)	3/46	0.0703728	0.260791	0	0	3.13545	8.32133	HSP90AB1;HSPA5;STAT1
Norovirus Hu/Norwalk/10129/2009/VNM protein p48 (gene: POL)	3/46	0.0703728	0.260647	0	0	3.13545	8.32133	HSP90AB1;HSPA5;STAT1
Norovirus Hu/Norwalk/10137/2009/VNM protein p48 (gene: POL)	3/46	0.0703728	0.260503	0	0	3.13545	8.32133	HSP90AB1;HSPA5;STAT1
Norovirus Hu/Norwalk/10145/2009/VNM protein p48 (gene: POL)	3/46	0.0703728	0.26036	0	0	3.13545	8.32133	HSP90AB1;HSPA5;STAT1
Norovirus Hu/Norwalk/10158/2009/VNM protein p48 (gene: POL)	3/46	0.0703728	0.260216	0	0	3.13545	8.32133	HSP90AB1;HSPA5;STAT1
Norovirus Hu/Norwalk/10160/2009/VNM protein p48 (gene: POL)	3/46	0.0703728	0.260073	0	0	3.13545	8.32133	HSP90AB1;HSPA5;STAT1
Norovirus Hu/Norwalk/10162/2009/VNM protein p48 (gene: POL)	3/46	0.0703728	0.25993	0	0	3.13545	8.32133	HSP90AB1;HSPA5;STAT1
Norovirus Hu/Norwalk/10169/2009/VNM protein p48 (gene: POL)	3/46	0.0703728	0.259787	0	0	3.13545	8.32133	HSP90AB1;HSPA5;STAT1
Norovirus Hu/Norwalk/10173/2009/VNM protein p48 (gene: POL)	3/46	0.0703728	0.259645	0	0	3.13545	8.32133	HSP90AB1;HSPA5;STAT1
Norovirus Hu/Norwalk/10176/2009/VNM protein p48 (gene: POL)	3/46	0.0703728	0.259502	0	0	3.13545	8.32133	HSP90AB1;HSPA5;STAT1
Norovirus Hu/Norwalk/10179/2009/VNM protein p48 (gene: POL)	3/46	0.0703728	0.25936	0	0	3.13545	8.32133	HSP90AB1;HSPA5;STAT1
Norovirus Hu/Norwalk/10182/2009/VNM protein p48 (gene: POL)	3/46	0.0703728	0.259217	0	0	3.13545	8.32133	HSP90AB1;HSPA5;STAT1
Norovirus Hu/Norwalk/10183/2009/VNM protein p48 (gene: POL)	3/46	0.0703728	0.259075	0	0	3.13545	8.32133	HSP90AB1;HSPA5;STAT1
Norovirus Hu/Norwalk/10194/2009/VNM protein p48 (gene: POL)	3/46	0.0703728	0.258933	0	0	3.13545	8.32133	HSP90AB1;HSPA5;STAT1
Norovirus Hu/Norwalk/10222/2009/VNM protein p48 (gene: POL)	3/46	0.0703728	0.258791	0	0	3.13545	8.32133	HSP90AB1;HSPA5;STAT1
Norovirus Hu/Norwalk/10235/2009/VNM protein p48 (gene: POL)	3/46	0.0703728	0.25865	0	0	3.13545	8.32133	HSP90AB1;HSPA5;STAT1
Norovirus Hu/Norwalk/10255/2009/VNM protein p48 (gene: POL)	3/46	0.0703728	0.258508	0	0	3.13545	8.32133	HSP90AB1;HSPA5;STAT1
Norovirus Hu/Norwalk/10285/2010/VNM protein p48 (gene: POL)	3/46	0.0703728	0.258367	0	0	3.13545	8.32133	HSP90AB1;HSPA5;STAT1
Norovirus Hu/Norwalk/10325/2010/VNM protein p48 (gene: POL)	3/46	0.0703728	0.258226	0	0	3.13545	8.32133	HSP90AB1;HSPA5;STAT1
Norovirus Hu/Norwalk/10368/2010/VNM protein p48 (gene: POL)	3/46	0.0703728	0.258085	0	0	3.13545	8.32133	HSP90AB1;HSPA5;STAT1
Norovirus Hu/Norwalk/10386/2010/VNM protein p48 (gene: POL)	3/46	0.0703728	0.257944	0	0	3.13545	8.32133	HSP90AB1;HSPA5;STAT1
Norovirus Hu/Norwalk/20019/2009/VNM protein p48 (gene: POL)	3/46	0.0703728	0.257803	0	0	3.13545	8.32133	HSP90AB1;HSPA5;STAT1
Norovirus Hu/Norwalk/20069/2009/VNM protein p48 (gene: POL)	3/46	0.0703728	0.257663	0	0	3.13545	8.32133	HSP90AB1;HSPA5;STAT1
Norovirus Hu/Norwalk/20092/2009/VNM protein p48 (gene: POL)	3/46	0.0703728	0.257522	0	0	3.13545	8.32133	HSP90AB1;HSPA5;STAT1
Norovirus Hu/Norwalk/20093/2009/VNM protein p48 (gene: POL)	3/46	0.0703728	0.257382	0	0	3.13545	8.32133	HSP90AB1;HSPA5;STAT1
Norovirus Hu/Norwalk/20122/2009/VNM protein p48 (gene: POL)	3/46	0.0703728	0.257242	0	0	3.13545	8.32133	HSP90AB1;HSPA5;STAT1
Norovirus Hu/Norwalk/20135/2009/VNM protein p48 (gene: POL)	3/46	0.0703728	0.257102	0	0	3.13545	8.32133	HSP90AB1;HSPA5;STAT1
Norovirus Hu/Norwalk/20139/2009/VNM protein p48 (gene: POL)	3/46	0.0703728	0.256962	0	0	3.13545	8.32133	HSP90AB1;HSPA5;STAT1
Influenza A virus (A/New York/602/1996(H3N2)) hemagglutinin (gene: HA)	4/76	0.0737914	0.269298	0	0	2.53036	6.59543	CD274;TPM4;STAT1;UBC
KI polyomavirus Stockholm 350 large T antigen	4/76	0.0737914	0.269152	0	0	2.53036	6.59543	HSPA8;HSPA5;STAT1;UBC
Orf virus ORF057 putative protein-tyrosine phosphatase	4/76	0.0737914	0.269006	0	0	2.53036	6.59543	HSPA8;HSPA5;STAT1;UBC
Chiba virus full_polyprotein 1..1785 (gene: ORF1)	3/47	0.0740611	0.269843	0	0	3.06874	7.98751	HSP90AB1;STAT1;SQSTM1
Echovirus E12 polyprotein region 4	3/47	0.0740611	0.269696	0	0	3.06874	7.98751	STAT1;UBC;ICAM1
Echovirus E27 VP1	3/47	0.0740611	0.26955	0	0	3.06874	7.98751	STAT1;UBC;ICAM1
Enterovirus B 1D(VP1)	3/47	0.0740611	0.269404	0	0	3.06874	7.98751	STAT1;UBC;ICAM1
Human T-lymphotropic virus 4 protease (gene: pro)	3/47	0.0740611	0.269258	0	0	3.06874	7.98751	HSP90AB1;STAT1;SQSTM1
Human adenovirus 36 E4 ORF1	3/47	0.0740611	0.269113	0	0	3.06874	7.98751	STAT1;UBC;SQSTM1
Human polyomavirus 10 large T Antigen	3/47	0.0740611	0.268967	0	0	3.06874	7.98751	HSPA8;STAT1;UBC
Norovirus GII/Hu/HKG/2013/GII.4/CUHK-NS-141 ORF1	3/47	0.0740611	0.268822	0	0	3.06874	7.98751	HSP90AB1;STAT1;SQSTM1
Norovirus GII/Hu/JP/2012/GII.Pe_GII.4_Sydney2012/Fukuyama/2 full_polyprotein 1..1699	3/47	0.0740611	0.268677	0	0	3.06874	7.98751	HSP90AB1;STAT1;SQSTM1
Norovirus GII/Hu/JP/2012/GII.Pe_GII.4_Sydney2012/Fukuyama/3 full_polyprotein 1..1699	3/47	0.0740611	0.268531	0	0	3.06874	7.98751	HSP90AB1;STAT1;SQSTM1
Norovirus GII/Hu/JP/2012/GII.Pe_GII.4_Sydney2012/Fukuyama/5 full_polyprotein 1..1699	3/47	0.0740611	0.268387	0	0	3.06874	7.98751	HSP90AB1;STAT1;SQSTM1
Norovirus GII/Hu/TW/2012/GII.Pe_GII.4_Sydney2012/Taipei/105 full_polyprotein 1..1699	3/47	0.0740611	0.268242	0	0	3.06874	7.98751	HSP90AB1;STAT1;SQSTM1
Norovirus Hu/GII-4/CGMH06/2006/TW full_polyprotein 1..1699	3/47	0.0740611	0.268097	0	0	3.06874	7.98751	HSP90AB1;STAT1;SQSTM1
Norovirus Hu/GII-4/CGMH20/2009/TW full_polyprotein 1..1699	3/47	0.0740611	0.267953	0	0	3.06874	7.98751	HSP90AB1;STAT1;SQSTM1
Norovirus Hu/GII-4/CGMH21/2010/TW full_polyprotein 1..1699	3/47	0.0740611	0.267808	0	0	3.06874	7.98751	HSP90AB1;STAT1;SQSTM1
Norovirus Hu/GII.4/Doonside/NSW536I/2011/AU full_polyprotein 1..1699	3/47	0.0740611	0.267664	0	0	3.06874	7.98751	HSP90AB1;STAT1;SQSTM1
Norovirus Hu/GII.4/Hong Kong/CUHK6080/2012/CHN full_polyprotein 1..1699	3/47	0.0740611	0.26752	0	0	3.06874	7.98751	HSP90AB1;STAT1;SQSTM1
Norovirus Hu/GII.4/NIHIC17.1/2012/USA protein p48 (gene: POL)	3/47	0.0740611	0.267377	0	0	3.06874	7.98751	HSP90AB1;HSPA5;STAT1
Norovirus Hu/GII.4/NIHIC35/2013/USA protein p48 (gene: POL)	3/47	0.0740611	0.267233	0	0	3.06874	7.98751	HSP90AB1;HSPA5;STAT1
Norovirus Hu/Norwalk/10078/2009/VNM protein p48 (gene: POL)	3/47	0.0740611	0.267089	0	0	3.06874	7.98751	HSP90AB1;HSPA5;STAT1
Norovirus Hu/Norwalk/10116/2009/VNM protein p48 (gene: POL)	3/47	0.0740611	0.266946	0	0	3.06874	7.98751	HSP90AB1;HSPA5;STAT1
Norovirus Hu/Norwalk/10163/2009/VNM protein p48 (gene: POL)	3/47	0.0740611	0.266803	0	0	3.06874	7.98751	HSP90AB1;HSPA5;STAT1
Norovirus Hu/Norwalk/20044/2009/VNM protein p48 (gene: POL)	3/47	0.0740611	0.26666	0	0	3.06874	7.98751	HSP90AB1;HSPA5;STAT1
Cowpox virus CPXV177 protein (gene: CPXV177 CDS)	7/176	0.0753965	0.271322	0	0	1.91215	4.9429	THBD;CD93;VWF;STAT1;UBC;SFTPA1;PTPRF
Monkeypox virus Zaire-96-I-16 Kelch-like protein (gene: C9L)	9/248	0.0755296	0.271656	0	0	1.74473	4.50703	LGALS3BP;HSPA8;UBB;HSPA5;STAT1;UBC;ISG15;RPS27A;SQSTM1
Coxsackievirus A8 VP4 protein	2/22	0.0758599	0.272698	0	0	4.37063	11.2713	UBC;SQSTM1
HBV genotype C pol (gene: P)	2/22	0.0758599	0.272552	0	0	4.37063	11.2713	HSPA8;HSPA5
Horsepox virus HSPV074c (ribonucleoside--diphosphate reductase large subunit)	2/22	0.0758599	0.272406	0	0	4.37063	11.2713	STAT1;UBC
Human adenovirus 17 pVI	2/22	0.0758599	0.27226	0	0	4.37063	11.2713	STAT1;UBC
Human adenovirus 19 pVI (gene: L3)	2/22	0.0758599	0.272115	0	0	4.37063	11.2713	STAT1;UBC
Human adenovirus 28 VI (gene: VI)	2/22	0.0758599	0.27197	0	0	4.37063	11.2713	STAT1;UBC
Human adenovirus 35 DBP	2/22	0.0758599	0.271825	0	0	4.37063	11.2713	STAT1;UBC
Human adenovirus 36 pVI	2/22	0.0758599	0.27168	0	0	4.37063	11.2713	STAT1;UBC
Human adenovirus 43 capsid protein precursor pVI (gene: L3)	2/22	0.0758599	0.271535	0	0	4.37063	11.2713	STAT1;UBC
Human adenovirus 46 pVI	2/22	0.0758599	0.27139	0	0	4.37063	11.2713	STAT1;UBC
Human adenovirus 49 pVI	2/22	0.0758599	0.271246	0	0	4.37063	11.2713	STAT1;UBC
Human adenovirus 54 13.6 kDa protein	2/22	0.0758599	0.271101	0	0	4.37063	11.2713	STAT1;SQSTM1
Human adenovirus 56 pVI protein (gene: L3)	2/22	0.0758599	0.270957	0	0	4.37063	11.2713	STAT1;UBC
Human adenovirus 63 pVI protein (gene: L3)	2/22	0.0758599	0.270813	0	0	4.37063	11.2713	STAT1;UBC
Human adenovirus 67 L3 pVI	2/22	0.0758599	0.270669	0	0	4.37063	11.2713	STAT1;UBC
Human adenovirus D10 pVI (gene: L3)	2/22	0.0758599	0.270525	0	0	4.37063	11.2713	STAT1;UBC
Human adenovirus D37 pVI (gene: L3)	2/22	0.0758599	0.270382	0	0	4.37063	11.2713	STAT1;UBC
Human adenovirus D8 13.6kDa protein (gene: E4)	2/22	0.0758599	0.270238	0	0	4.37063	11.2713	STAT1;SQSTM1
Human alphaherpesvirus 1 DNA polymerase processivity subunit (gene: UL42)	2/22	0.0758599	0.270095	0	0	4.37063	11.2713	STAT1;UBC
Human mastadenovirus D capsid protein precursor pVI (gene: L3)	2/22	0.0758599	0.269952	0	0	4.37063	11.2713	STAT1;UBC
Human mastadenovirus D pVI	2/22	0.0758599	0.269809	0	0	4.37063	11.2713	STAT1;UBC
Human papillomavirus 155 E7	2/22	0.0758599	0.269666	0	0	4.37063	11.2713	UBC;SQSTM1
Human papillomavirus type 40 early protein (gene: E1)	2/22	0.0758599	0.269523	0	0	4.37063	11.2713	STAT1;SQSTM1
Human papillomavirus type 6b E7 protein (gene: E7)	2/22	0.0758599	0.269381	0	0	4.37063	11.2713	UBC;SQSTM1
Human papillomavirus type 96 E1	2/22	0.0758599	0.269239	0	0	4.37063	11.2713	STAT1;SQSTM1
Human rhinovirus A15 2C (P2-C)	2/22	0.0758599	0.269096	0	0	4.37063	11.2713	ATP5B;STAT1
Human rhinovirus A23 2C (P2-C)	2/22	0.0758599	0.268954	0	0	4.37063	11.2713	STAT1;UBC
Human rhinovirus A45 2C	2/22	0.0758599	0.268812	0	0	4.37063	11.2713	STAT1;UBC
Human rhinovirus A53 1B (VP2)	2/22	0.0758599	0.268671	0	0	4.37063	11.2713	STAT1;ICAM1
Macacine alphaherpesvirus 1 DNA polymerase processivity subunit (gene: UL42)	2/22	0.0758599	0.268529	0	0	4.37063	11.2713	STAT1;UBC
Norovirus Hu/GI.2/Jingzhou/2013401/CHN major capsid protein VP1	2/22	0.0758599	0.268387	0	0	4.37063	11.2713	STAT1;SQSTM1
Rotavirus A VP3 (gene: VP3)	2/22	0.0758599	0.268246	0	0	4.37063	11.2713	HSPA5;STAT1
Simian foamy virus full_polyprotein 1..1146 (gene: pol)	6/142	0.076496	0.270353	0	0	2.03142	5.2218	RPS4X;HSP90AB1;HSPA5;STAT1;UBC;SQSTM1
Cercopithecine betaherpesvirus 5 membrane glycoprotein US3 (gene: US3)	4/77	0.0766215	0.270654	0	0	2.4975	6.41578	DAXX;STAT1;FLNA;SQSTM1
Human adenovirus 50 maturation protein IVa2 (gene: IVa2)	4/77	0.0766215	0.270512	0	0	2.4975	6.41578	UBB;HSPA5;STAT1;UBC
Human papillomavirus 109 E2 protein (gene: E2)	3/48	0.0778336	0.274647	0	0	3.00481	7.67182	STAT1;RPL23;DYNLL1
Human papillomavirus 19 early protein (gene: E2)	3/48	0.0778336	0.274503	0	0	3.00481	7.67182	STAT1;RPL23;DYNLL1
Influenza A virus (A/Hong Kong/1073/99(H9N2)) matrix protein 1 (gene: M1)	3/48	0.0778336	0.274358	0	0	3.00481	7.67182	HSPA8;HSPA5;STAT1
New Jersey polyomavirus-2013 large T antigen	3/48	0.0778336	0.274214	0	0	3.00481	7.67182	HSPA8;HSPA5;STAT1
Norovirus GII/Hu/JP/2007/GII.P7_GII.14/Fukuoka/KK282 full_polyprotein 1..1697	3/48	0.0778336	0.274071	0	0	3.00481	7.67182	HSP90AB1;STAT1;SQSTM1
Norovirus GII/Hu/JP/2010/GII.P4_GII.4/Shimada/ASC96 full_polyprotein 1..1699	3/48	0.0778336	0.273927	0	0	3.00481	7.67182	HSP90AB1;STAT1;SQSTM1
Norovirus Hu/GII.12/HS206/2010/USA full_polyprotein 1..1701	3/48	0.0778336	0.273784	0	0	3.00481	7.67182	HSP90AB1;STAT1;SQSTM1
Norovirus Hu/GII.12/HS210/2010/USA full_polyprotein 1..1701	3/48	0.0778336	0.27364	0	0	3.00481	7.67182	HSP90AB1;STAT1;SQSTM1
Norovirus Hu/GII.4/Caringbah/NSW409G/2011/AU full_polyprotein 1..1699	3/48	0.0778336	0.273497	0	0	3.00481	7.67182	HSP90AB1;STAT1;SQSTM1
Norovirus Hu/GII.4/Hong Kong/CUHK3630/2012/CHN full_polyprotein 1..1699	3/48	0.0778336	0.273354	0	0	3.00481	7.67182	HSP90AB1;STAT1;SQSTM1
Norovirus Hu/GII.4/Ohio/7I/2012/USA full_polyprotein 1..1699	3/48	0.0778336	0.273211	0	0	3.00481	7.67182	HSP90AB1;STAT1;SQSTM1
Norovirus Hu/GII/BG1C0282/2011/BGD protein p48 (gene: POL)	3/48	0.0778336	0.273068	0	0	3.00481	7.67182	HSP90AB1;HSPA5;STAT1
Norovirus Hu/Norwalk/20008/2009/VNM protein p48 (gene: POL)	3/48	0.0778336	0.272926	0	0	3.00481	7.67182	HSP90AB1;HSPA5;STAT1
KI polyomavirus large T antigen	4/78	0.0795055	0.278643	0	0	2.46548	6.24243	HSPA8;HSPA5;STAT1;UBC
Vaccinia virus RNA helicase NPH-II (gene: I8R)	4/78	0.0795055	0.278497	0	0	2.46548	6.24243	DDX17;HSPA8;DDX5;PABPC1
Vaccinia virus Ankara Kelch-like protein, modulator of inflammation	7/179	0.0808124	0.282928	0	0	1.8801	4.72963	LGALS3BP;HSPA8;HSPA5;STAT1;UBC;ISG15;SQSTM1
Coxsackievirus A17 2C	3/49	0.0816887	0.285847	0	0	2.94349	7.37296	ATP5B;STAT1;UBC
Echovirus 9 strain Barty VP1	3/49	0.0816887	0.285698	0	0	2.94349	7.37296	STAT1;UBC;ICAM1
Echovirus E14 VP1	3/49	0.0816887	0.285549	0	0	2.94349	7.37296	STAT1;UBC;ICAM1
Echovirus E2 VP1	3/49	0.0816887	0.2854	0	0	2.94349	7.37296	STAT1;UBC;ICAM1
Human papillomavirus 107 E7 protein (gene: E7)	3/49	0.0816887	0.285252	0	0	2.94349	7.37296	STAT1;UBC;SQSTM1
Influenza A virus (A/goose/Guangdong/1/1996(H5N1)) matrix protein 1 (gene: M1)	3/49	0.0816887	0.285104	0	0	2.94349	7.37296	HSPA8;HSPA5;STAT1
Norovirus GII/Hu/JP/2007/GII.P21_GII.21/Kawasaki/YO284 full_polyprotein 1..1699	3/49	0.0816887	0.284956	0	0	2.94349	7.37296	HSP90AB1;STAT1;SQSTM1
Norovirus GII/Hu/JP/2007/GII.P7_GII.14/Sendai/YG99 full_polyprotein 1..1697	3/49	0.0816887	0.284808	0	0	2.94349	7.37296	HSP90AB1;STAT1;SQSTM1
Norovirus GII/Hu/JP/2011/GII/Yuzawa/Gira2HS full_polyprotein 1..1693	3/49	0.0816887	0.28466	0	0	2.94349	7.37296	HSP90AB1;STAT1;SQSTM1
Norovirus Hu/GII-4/CGMH27/2010/TW full_polyprotein 1..1699	3/49	0.0816887	0.284512	0	0	2.94349	7.37296	HSP90AB1;STAT1;SQSTM1
Norovirus Hu/GII.4/CHDC2094/1974/US full_polyprotein 1..1699	3/49	0.0816887	0.284365	0	0	2.94349	7.37296	HSP90AB1;STAT1;SQSTM1
Norovirus Hu/GII.4/NIHIC2.2/2010/USA protein p48 (gene: POL)	3/49	0.0816887	0.284217	0	0	2.94349	7.37296	HSP90AB1;HSPA5;STAT1
Norovirus Hu/GII.4/NIHIC2.3/2010/USA protein p48 (gene: POL)	3/49	0.0816887	0.28407	0	0	2.94349	7.37296	HSP90AB1;HSPA5;STAT1
Norovirus Hu/GII.4/Ohio/7G/2012/USA full_polyprotein 1..1699	3/49	0.0816887	0.283923	0	0	2.94349	7.37296	HSP90AB1;STAT1;SQSTM1
Norovirus Hu/GII.4/Randwick/NSW882J/2011/AU full_polyprotein 1..1699	3/49	0.0816887	0.283776	0	0	2.94349	7.37296	HSP90AB1;STAT1;SQSTM1
Norovirus Hu/Norwalk/20047/2009/VNM protein p48 (gene: POL)	3/49	0.0816887	0.28363	0	0	2.94349	7.37296	HSP90AB1;HSPA5;STAT1
Norovirus Hu/Shanghai/SH5/2009/CHN full_polyprotein 1..1699	3/49	0.0816887	0.283483	0	0	2.94349	7.37296	HSP90AB1;STAT1;SQSTM1
Cercopithecine alphaherpesvirus 2 envelope glycoprotein G (gene: US4)	2/23	0.0819783	0.284341	0	0	4.1806	10.4569	STAT1;UBC
Enterovirus D NTPase 2C	2/23	0.0819783	0.284194	0	0	4.1806	10.4569	STAT1;UBC
Human T-cell lymphotropic virus type 2b gag	2/23	0.0819783	0.284048	0	0	4.1806	10.4569	STAT1;UBC
Human adenovirus 46 ORF5(6)	2/23	0.0819783	0.283901	0	0	4.1806	10.4569	STAT1;SQSTM1
Human adenovirus 56 Orf 3 protein (gene: E4)	2/23	0.0819783	0.283755	0	0	4.1806	10.4569	STAT1;SQSTM1
Human adenovirus 63 Orf 3 protein (gene: E4)	2/23	0.0819783	0.283609	0	0	4.1806	10.4569	STAT1;SQSTM1
Human adenovirus 64 E4 13.5 kDa protein	2/23	0.0819783	0.283463	0	0	4.1806	10.4569	STAT1;SQSTM1
Human adenovirus 66 DNA binding protein (gene: E2A)	2/23	0.0819783	0.283317	0	0	4.1806	10.4569	HSP90AB1;UBC
Human adenovirus 7 DBP	2/23	0.0819783	0.283171	0	0	4.1806	10.4569	HSP90AB1;UBC
Human adenovirus Chiba_E086/2012 Orf3 (gene: E4)	2/23	0.0819783	0.283025	0	0	4.1806	10.4569	STAT1;SQSTM1
Human adenovirus D10 Orf3 protein (gene: E4)	2/23	0.0819783	0.28288	0	0	4.1806	10.4569	STAT1;SQSTM1
Human adenovirus D37 13.6 kDa (gene: E4)	2/23	0.0819783	0.282735	0	0	4.1806	10.4569	STAT1;SQSTM1
Human betaherpesvirus 6 LJ1 (gene: LJ1)	2/23	0.0819783	0.28259	0	0	4.1806	10.4569	STAT1;UBC
Human mastadenovirus D control protein E4orf3 (gene: E4)	2/23	0.0819783	0.282445	0	0	4.1806	10.4569	STAT1;SQSTM1
Human mastadenovirus F single-stranded DNA-binding protein (gene: E2A)	2/23	0.0819783	0.2823	0	0	4.1806	10.4569	STAT1;UBC
Human papillomavirus type 88 E7 protein	2/23	0.0819783	0.282155	0	0	4.1806	10.4569	UBC;SQSTM1
Human rhinovirus A1 1C	2/23	0.0819783	0.282011	0	0	4.1806	10.4569	STAT1;ICAM1
Human rhinovirus A29 2C	2/23	0.0819783	0.281866	0	0	4.1806	10.4569	ATP5B;STAT1
Human rhinovirus A30 1C	2/23	0.0819783	0.281722	0	0	4.1806	10.4569	STAT1;ICAM1
Human rhinovirus A43 1B	2/23	0.0819783	0.281578	0	0	4.1806	10.4569	STAT1;ICAM1
Human rhinovirus A82 1B	2/23	0.0819783	0.281434	0	0	4.1806	10.4569	STAT1;ICAM1
Molluscum contagiosum virus subtype 1 MC056L (gene: MC056L)	2/23	0.0819783	0.28129	0	0	4.1806	10.4569	STAT1;SQSTM1
Rhinovirus A81 2C	2/23	0.0819783	0.281146	0	0	4.1806	10.4569	STAT1;ICAM1
Vaccinia virus semaphorin-like protein (gene: A39R)	2/23	0.0819783	0.281003	0	0	4.1806	10.4569	HSP90AB1;STAT1
Yaba monkey tumor virus dUTPase	2/23	0.0819783	0.280859	0	0	4.1806	10.4569	STAT1;SQSTM1
Ectromelia virus ERPV RNA helicase	4/79	0.0824428	0.282307	0	0	2.43427	6.0751	HSPA8;DDX5;STAT1;PABPC1
Horsepox virus HSPV029 (kelch-like protein; Provisional)	8/216	0.0827157	0.283097	0	0	1.78063	4.43794	LGALS3BP;HSPA8;UBB;HSPA5;STAT1;UBC;ISG15;SQSTM1
Ectromelia virus ERPV kelch-like protein	10/291	0.0838956	0.286989	0	0	1.65213	4.09427	LGALS3BP;HSPA8;HSP90AB1;UBB;HSPA5;STAT1;UBC;ISG15;RPS27A;SQSTM1
Human mastadenovirus F encapsidation protein IVa2 (gene: IVa2)	4/80	0.0854329	0.292099	0	0	2.40385	5.91352	UBB;STAT1;UBC;SQSTM1
Echovirus 9 strain Hill polyprotein region 4	3/50	0.0856246	0.292605	0	0	2.88462	7.08976	STAT1;UBC;ICAM1
Echovirus E13 VP1	3/50	0.0856246	0.292456	0	0	2.88462	7.08976	STAT1;UBC;ICAM1
Echovirus E15 VP1	3/50	0.0856246	0.292308	0	0	2.88462	7.08976	STAT1;UBC;ICAM1
Echovirus E17 VP2	3/50	0.0856246	0.292159	0	0	2.88462	7.08976	STAT1;CFB;TAPBP
Echovirus E17 VP1	3/50	0.0856246	0.292011	0	0	2.88462	7.08976	STAT1;UBC;ICAM1
Human enterovirus 79 1B (VP2)	3/50	0.0856246	0.291863	0	0	2.88462	7.08976	STAT1;CFB;ICAM1
Influenza A virus (A/Korea/426/1968(H2N2)) PB1-F2 protein (gene: PB1-F2)	3/50	0.0856246	0.291714	0	0	2.88462	7.08976	STAT1;UBC;SQSTM1
Influenza A virus (A/Shanghai/02/2013(H7N9)) PB1-F2 protein (gene: PB1-F2)	3/50	0.0856246	0.291567	0	0	2.88462	7.08976	STAT1;UBC;SQSTM1
Norovirus GII/Hu/JP/2002/GII.P12_GII.13/Saitama/T80 full_polyprotein 1..1699	3/50	0.0856246	0.291419	0	0	2.88462	7.08976	HSP90AB1;STAT1;SQSTM1
Norovirus Hu/GII-4/CGMH11/2006/TW full_polyprotein 1..1699	3/50	0.0856246	0.291271	0	0	2.88462	7.08976	HSP90AB1;STAT1;SQSTM1
Norovirus Hu/GII.4/CHDC3967/1988/US full_polyprotein 1..1699	3/50	0.0856246	0.291124	0	0	2.88462	7.08976	HSP90AB1;STAT1;SQSTM1
Norovirus Hu/GII.4/CHDC4871/1977/US full_polyprotein 1..1699	3/50	0.0856246	0.290976	0	0	2.88462	7.08976	HSP90AB1;STAT1;SQSTM1
Norovirus Hu/GII.4/Ohio/684/USA full_polyprotein 1..1699	3/50	0.0856246	0.290829	0	0	2.88462	7.08976	HSP90AB1;STAT1;SQSTM1
Norovirus Hu/GII.4/Rockdale/NSW006D/2009/AU full_polyprotein 1..1699	3/50	0.0856246	0.290682	0	0	2.88462	7.08976	HSP90AB1;STAT1;SQSTM1
Snow Mountain virus full_polyprotein 1..1699 (gene: ORF1)	3/50	0.0856246	0.290535	0	0	2.88462	7.08976	HSP90AB1;STAT1;SQSTM1
Aichi virus 1 VP3	2/24	0.0882423	0.299266	0	0	4.00641	9.72624	STAT1;ICAM1
Cosavirus A VP2	2/24	0.0882423	0.299115	0	0	4.00641	9.72624	STAT1;ICAM1
Enterovirus A VP1 (1D)	2/24	0.0882423	0.298964	0	0	4.00641	9.72624	STAT1;UBC
Enterovirus H ATPase	2/24	0.0882423	0.298814	0	0	4.00641	9.72624	STAT1;UBC
Human T-lymphotropic virus 2 hypothetical protein (gag polyprotein)	2/24	0.0882423	0.298663	0	0	4.00641	9.72624	STAT1;UBC
Human adenovirus 61 E2A DNA binding protein	2/24	0.0882423	0.298512	0	0	4.00641	9.72624	STAT1;UBC
Human alphaherpesvirus 2 DNA polymerase processivity subunit (gene: UL42)	2/24	0.0882423	0.298362	0	0	4.00641	9.72624	STAT1;UBC
Human betaherpesvirus 6A protein DR1 (gene: DR1)	2/24	0.0882423	0.298212	0	0	4.00641	9.72624	HSPA8;STAT1
Human betaherpesvirus 6B G-protein coupled receptor fragment (gene: U12)	2/24	0.0882423	0.298062	0	0	4.00641	9.72624	STAT1;UBC
Human gammaherpesvirus 8 ORF69	2/24	0.0882423	0.297912	0	0	4.00641	9.72624	STAT1;SQSTM1
Human papillomavirus 171 E7	2/24	0.0882423	0.297762	0	0	4.00641	9.72624	UBC;SQSTM1
Human papillomavirus 172 E7	2/24	0.0882423	0.297613	0	0	4.00641	9.72624	STAT1;SQSTM1
Human papillomavirus type 16 protein E6* (gene: E6)	2/24	0.0882423	0.297463	0	0	4.00641	9.72624	STAT1;UBC
Human papillomavirus type 60 transforming protein E7 (gene: E7)	2/24	0.0882423	0.297314	0	0	4.00641	9.72624	STAT1;SQSTM1
Human parechovirus 8 2C	2/24	0.0882423	0.297165	0	0	4.00641	9.72624	STAT1;UBC
Human rhinovirus A30 1D	2/24	0.0882423	0.297016	0	0	4.00641	9.72624	STAT1;ICAM1
Human rhinovirus A44 1B (VP2)	2/24	0.0882423	0.296867	0	0	4.00641	9.72624	STAT1;ICAM1
Human rhinovirus A50 1B	2/24	0.0882423	0.296719	0	0	4.00641	9.72624	STAT1;ICAM1
Human rhinovirus A57 1B	2/24	0.0882423	0.29657	0	0	4.00641	9.72624	STAT1;ICAM1
[truncated: 3,296 more rows]

## Sheet: GSE50000 Virus PPI
Virus-Host PPI P-HIPSTer 2020 GSE50000
Term	Overlap	P-value	Adjusted P-value	Old P-value	Old Adjusted P-value	Odds Ratio	Combined Score	Genes
Horsepox virus HSPV002 (chemokine binding protein; Provisional)	10/45	1.11569e-08	7.49188e-05	0	0	11.5141	210.837	CCL8;CCL7;ITGA4;STAT1;CD8A;CCL5;CCL4;CCL2;CXCL13;CXCL5
Cowpox virus CrmD or CPXV221 protein (gene: CrmD)	10/48	2.17257e-08	7.29441e-05	0	0	10.7945	190.466	CCL8;CCL7;STAT1;CD8A;CCL5;CCL4;CCL2;BRCA1;TNF;CXCL5
Human gammaherpesvirus 8 K6 (gene: K6)	11/62	2.5263e-08	5.6547e-05	0	0	9.19271	160.817	CXCL9;CCL8;ITGA4;CCL7;CD8A;STAT1;CCL5;CCL4;CCL2;CXCL13;CXCL5
Monkeypox virus Zaire-96-I-16 J2L (gene: J2L)	11/63	3.00831e-08	5.0502e-05	0	0	9.0468	156.684	CCL8;ITGA4;CCL7;CD8A;STAT1;CCL5;CCL4;CCL2;BRCA1;TNF;CXCL5
Cercopithecine betaherpesvirus 5 chemokine vCXCL10 (gene: UL146G)	13/96	4.00225e-08	5.37502e-05	0	0	7.01641	119.516	CXCL9;ITGA4;STAT1;BRCA1;CXCL13;CXCL5;CCL8;CCL7;CD8A;CCL5;UBD;CCL4;CCL2
Monkeypox virus TNF-alpha-receptor-like protein	11/67	5.85898e-08	6.55718e-05	0	0	8.50669	141.659	CCL8;ITGA4;CCL7;CD8A;STAT1;CCL5;CCL4;CCL2;BRCA1;TNF;CXCL5
Human gammaherpesvirus 8 K4.1 (gene: K4.1)	15/137	6.7046e-08	6.43163e-05	0	0	5.67301	93.7061	CXCL9;ITGA4;STAT1;ISG15;BRCA1;CXCL13;CXCL5;FYB;CCL8;CCL7;CD8A;UBD;CCL5;CCL4;CCL2
Molluscum contagiosum virus subtype 1 MC148R (gene: MC148R)	15/141	9.85444e-08	8.27157e-05	0	0	5.51207	88.9249	CD96;CXCL9;ITGA4;STAT1;BRCA1;CXCL13;CXCL5;CCL8;CCL7;CD8A;UBD;CCL5;CCL4;CCL2;PDCD1
Ectromelia virus ERPV tumor necrosis factor receptor	10/57	1.22904e-07	9.17002e-05	0	0	9.09008	144.64	CCL8;CCL7;CD8A;STAT1;CCL5;CCL4;CCL2;BRCA1;TNF;CXCL5
Horsepox virus HSPV003 (Tumor necrosis factor receptor superfamily members)	10/57	1.22904e-07	8.25301e-05	0	0	9.09008	144.64	CCL8;ITGA4;CD8A;STAT1;CCL5;CCL4;CCL2;BRCA1;TNF;CXCL5
Vaccinia virus chemokine binding protein (gene: C23L)	10/57	1.22904e-07	7.50274e-05	0	0	9.09008	144.64	CXCL9;CCL8;CCL7;CD8A;STAT1;CCL5;CCL4;CCL2;CXCL13;CXCL5
Vaccinia virus Ankara viral chemokine binding protein	10/57	1.22904e-07	6.87751e-05	0	0	9.09008	144.64	CXCL9;CCL8;CCL7;CD8A;STAT1;CCL5;CCL4;CCL2;CXCL13;CXCL5
Variola virus hypothetical protein (gene: G4R)	10/57	1.22904e-07	6.34847e-05	0	0	9.09008	144.64	CCL8;ITGA4;CD8A;STAT1;CCL5;CCL4;CCL2;BRCA1;TNF;CXCL5
Cercopithecine betaherpesvirus 5 chemokine vCXCL2 (gene: UL147)	14/127	1.69036e-07	8.10771e-05	0	0	5.71172	89.0637	CXCL9;ITGA4;STAT1;BRCA1;CXCL13;CXCL5;FYB;CCL8;CCL7;CD8A;UBD;CCL5;CCL4;CCL2
Monkeypox virus chemokine-binding protein	9/46	1.98432e-07	8.88315e-05	0	0	10.1374	156.449	CCL8;CCL7;ITGA4;STAT1;CCL5;CCL4;CCL2;CXCL13;CXCL5
Monkeypox virus Zaire-96-I-16 chemokine binding protein (gene: J1L)	9/47	2.41286e-07	0.000101265	0	0	9.92173	151.18	CCL8;CCL7;ITGA4;STAT1;CCL5;CCL4;CCL2;CXCL13;CXCL5
Influenza A virus (A/Puerto Rico/8/1934(H1N1)) haemagglutinin (gene: HA)	11/78	2.93349e-07	0.000115873	0	0	7.30703	109.912	GBP6;CD274;MIS18BP1;CD8A;STAT1;BRCA1;THY1;GBP2;ICOS;GBP4;GBP3
Cercopithecine betaherpesvirus 5 chemokine vCXCL9 (gene: UL146F)	10/63	3.28179e-07	0.000122429	0	0	8.22436	122.787	CCL8;ITGA4;CCL7;CD8A;STAT1;CCL5;CCL4;CCL2;CXCL13;CXCL5
Variola virus chemokine binding protein (gene: G5R)	9/51	5.03249e-07	0.000177859	0	0	9.14355	132.601	CXCL9;CCL8;CCL7;STAT1;CCL5;CCL4;CCL2;CXCL13;CXCL5
Cowpox virus CrmB or CPXV005 protein (gene: crmB)	10/66	5.146e-07	0.000172777	0	0	7.85053	113.675	CCL8;ITGA4;CD8A;STAT1;CCL5;CCL4;CCL2;BRCA1;TNF;CXCL5
Human betaherpesvirus 5 chemokine vCXCL1 (gene: UL146)	13/127	1.10025e-06	0.000351818	0	0	5.30374	72.7672	CXCL9;ITGA4;STAT1;BRCA1;CXCL13;CXCL5;CCL8;CCL7;CD8A;UBD;CCL5;CCL4;CCL2
Variola virus hypothetical protein (gene: A35L)	8/44	1.72857e-06	0.000527606	0	0	9.42063	124.995	UHRF1;STAT1;FIGNL1;UBD;ISG15;BRCA1;TK1;TRIP13
Monkeypox virus bifunctional hemagglutinin/type-I membrane glycoprotein	23/384	1.81392e-06	0.000529584	0	0	3.10341	41.0272	CD274;ITGA4;STAT1;CRTAM;ISG15;THY1;BRCA1;LILRB4;TNF;IL18BP;CCL8;CCL7;CD8A;UBD;CCL5;IL2RB;SLAMF8;CD28;SLAMF7;CD226;SLAMF6;PDCD1;ICOS
Influenza A virus (A/California/04/2009(H1N1)) hemagglutinin (gene: HA)	9/61	2.42007e-06	0.000677114	0	0	7.64461	98.8579	GBP6;CD274;CD8A;STAT1;BRCA1;GBP2;ICOS;GBP4;GBP3
Influenza A virus (A/California/07/2009(H1N1)) hemagglutinin (gene: HA)	9/61	2.42007e-06	0.00065003	0	0	7.64461	98.8579	GBP6;CD274;CD8A;STAT1;BRCA1;GBP2;ICOS;GBP4;GBP3
Human mastadenovirus F membrane glycoprotein E3 CR1-beta (gene: E3A)	21/335	2.51029e-06	0.00064833	0	0	3.24801	41.8834	CD274;ITGA4;STAT1;CRTAM;ISG15;THY1;BRCA1;LILRB4;CXCL5;CCL8;CCL7;CD8A;UBD;CCL4;SLAMF8;SLAMF7;CCL2;CD226;SLAMF6;PDCD1;ICOS
Human papillomavirus type 53 early protein (gene: E7)	7/36	4.86584e-06	0.00121015	0	0	10.0748	123.248	CCNA2;CCNB1;ITGA4;STAT1;UBD;CCNF;BRCA1
Molluscum contagiosum virus subtype 1 MC161R (gene: MC161R)	9/67	5.38885e-06	0.00129236	0	0	6.96002	84.4332	ITGA4;CD8A;STAT1;UBD;CRTAM;CD28;CD48;SLAMF6;BRCA1
Human betaherpesvirus 6B glycoprotein (gene: U85)	22/383	5.95818e-06	0.00137963	0	0	2.97623	35.8063	ITGA4;STAT1;UHRF1;CRTAM;ISG15;THY1;BRCA1;LILRB4;IL18BP;CCL8;CHL1;CD8A;UBD;SLAMF8;SLAMF7;CCL2;CD226;SLAMF6;NRCAM;PDCD1;ICOS;LAIR1
Human rhinovirus A33 2C	6/25	6.4528e-06	0.00144435	0	0	12.4352	148.613	STAT1;FIGNL1;BIRC5;BRCA1;TK1;HIST2H2AC
Cercopithecine betaherpesvirus 5 chemokine vCXCL5 (gene: UL146B)	9/69	6.90414e-06	0.00149553	0	0	6.75828	80.3113	CXCL9;CCL8;CCL7;CD8A;STAT1;CCL5;CCL4;CCL2;CXCL5
Cowpox virus CPXV194 protein (gene: CPXV194 CDS)	18/276	7.63955e-06	0.00160311	0	0	3.37914	39.8136	ITGA4;STAT1;CRTAM;ISG15;THY1;BRCA1;LILRB4;TNF;CD8A;UBD;SLAMF8;CD28;CDK1;SLAMF7;CD226;SLAMF6;NRCAM;ICOS
Human betaherpesvirus 5 chemokine vCXCL2 (gene: UL147)	12/131	9.07308e-06	0.00184623	0	0	4.74627	55.1052	CXCL9;CCL8;ITGA4;CCL7;CD8A;STAT1;CCL5;CCL4;CCL2;BRCA1;CXCL13;CXCL5
Influenza A virus (A/California/07/2009(H1N1)) HA1 (gene: HA)	7/40	1.0169e-05	0.00200838	0	0	9.06736	104.24	GBP6;STAT1;CD8A;BRCA1;GBP2;GBP4;GBP3
Cowpox virus CPXV014 protein (gene: CPXV014 CDS)	6/27	1.0439e-05	0.0020028	0	0	11.5141	132.066	CCL8;STAT1;CCL5;CCL4;CCL2;BRCA1
Variola virus hypothetical protein (gene: J9R)	22/398	1.09095e-05	0.00203492	0	0	2.86406	32.7244	CD274;ITGA4;STAT1;CRTAM;GZMB;ISG15;THY1;BRCA1;TNF;LILRB4;CCL8;CD8A;CCL5;UBD;CDK1;SLAMF8;CD28;SLAMF7;TCAP;CD226;SLAMF6;ICOS
Yaba monkey tumor virus IEV and EEV membrane glycoprotein	15/209	1.42476e-05	0.00258574	0	0	3.71867	41.4964	CXCL9;CD72;ITGA4;STAT1;KLRC3;BRCA1;TNF;CXCL5;KLRK1;CCL8;CD8A;UBD;CCL5;KLRC1;CLEC4E
Coxsackievirus A12 3C protein	4/9	1.59416e-05	0.00281704	0	0	23.0282	254.383	ITGA4;CD8A;STAT1;BRCA1
Coxsackievirus A6 3C protein	4/9	1.59416e-05	0.00274481	0	0	23.0282	254.383	ITGA4;CD8A;STAT1;BRCA1
Vaccinia virus soluble interferon-gamma receptor-like protein (gene: B8R)	6/29	1.62143e-05	0.00272197	0	0	10.72	118.238	ITGA4;IFNG;STAT1;CD8A;UBD;BRCA1
Vaccinia virus Ankara secreted interferon gamma receptor	6/29	1.62143e-05	0.00265558	0	0	10.72	118.238	ITGA4;IFNG;STAT1;CD8A;UBD;BRCA1
Influenza A virus (A/Puerto Rico/8/1934(H1N1)) HA1 (gene: HA)	7/44	1.956e-05	0.00312728	0	0	8.24305	89.3714	GBP6;MIS18BP1;CD8A;BRCA1;GBP2;GBP4;GBP3
Monkeypox virus bifunctional EEV membrane phosphoglycoprotein/associates with A36R	7/44	1.956e-05	0.00305455	0	0	8.24305	89.3714	CCL8;STAT1;CD8A;CCL5;CCL4;CLEC4E;CXCL5
Monkeypox virus Zaire-96-I-16 A35R (gene: A35R)	7/44	1.956e-05	0.00298513	0	0	8.24305	89.3714	CCL8;STAT1;CD8A;CCL5;CCL4;CLEC4E;CXCL5
Human herpesvirus 4 type 2 BARF1	17/269	2.04871e-05	0.00305714	0	0	3.27446	35.3501	CD274;RRM2;ITGA4;STAT1;CRTAM;LILRB4;IL18BP;CKS1B;CHL1;CD8A;UBD;SLAMF8;SLAMF7;CD226;SLAMF6;CD48;ICOS
Vaccinia virus hemagglutinin (gene: A56R)	27/576	2.23005e-05	0.00325539	0	0	2.42876	26.0142	CD274;UHRF1;THY1;BRCA1;TNF;CXCL5;IL18BP;CCL8;CCL7;CCL5;UBD;CCL4;SLAMF8;CCL2;SLAMF7;SLAMF6;ICOS;ITGA4;STAT1;CRTAM;ISG15;LILRB4;CD8A;CD28;TCAP;CD226;PDCD1
Ectromelia virus ERPV chemokine binding protein	6/31	2.4326e-05	0.00347551	0	0	10.0284	106.542	CCL8;CCL7;ITGA4;STAT1;CCL4;CCL2
Coxsackievirus A8 3C protein	4/10	2.61646e-05	0.00366032	0	0	20.7254	218.676	ITGA4;CD8A;STAT1;BRCA1
Human betaherpesvirus 5 membrane protein UL14 (gene: UL14)	7/46	2.64299e-05	0.00362198	0	0	7.88466	83.1123	ITGA4;STAT1;CD8A;UBD;CD226;BRCA1;ICOS
Vaccinia virus Ankara serine/threonine-protein kinase-like	9/82	2.86407e-05	0.00384644	0	0	5.68684	59.4883	CCNA2;ITK;CCNB1;ITGA4;STAT1;PLK1;CDK1;BRCA1;AURKA
Human betaherpesvirus 7 membrane glycoprotein UL119 (gene: U85)	22/425	2.98738e-05	0.00393339	0	0	2.68211	27.9436	CD274;TNXB;ITGA4;STAT1;CRTAM;TNC;ISG15;THY1;BRCA1;LILRB4;IL18BP;CCL8;CHL1;CD8A;UBD;SLAMF8;SLAMF7;CD226;SLAMF6;CD48;NRCAM;ICOS
Human gammaherpesvirus 4 BARF1 protein (gene: BARF1)	16/251	3.2209e-05	0.00415929	0	0	3.30285	34.1623	CD274;ITGA4;STAT1;CRTAM;LILRB4;IL18BP;CKS1B;CHL1;CD8A;UBD;SLAMF8;SLAMF7;CD226;SLAMF6;CD48;ICOS
Enterovirus A protease 3C	4/11	4.04899e-05	0.00512999	0	0	18.8413	190.569	ITGA4;CD8A;STAT1;BRCA1
Human papillomavirus type 67 E7	6/34	4.23154e-05	0.005262	0	0	9.14355	92.0789	CCNB1;ITGA4;STAT1;CD8A;UBD;BRCA1
Mupapillomavirus 1 E7 protein (gene: E7)	6/34	4.23154e-05	0.00516633	0	0	9.14355	92.0789	CCNB1;ITGA4;STAT1;CD8A;UBD;BRCA1
Human adenovirus 18 CR1-beta protein (gene: E3)	27/598	4.26083e-05	0.00510919	0	0	2.3394	23.5425	CD274;THY1;BRCA1;TNF;CXCL5;CCL8;CCL7;CHL1;UBD;CCL4;SLAMF8;CCL2;SLAMF7;SLAMF6;NRCAM;ICOS;CD96;ITGA4;STAT1;CRTAM;ISG15;LILRB4;CD8A;CD28;CD226;CD48;PDCD1
Monkeypox virus Zaire-96-I-16 B2R (gene: B2R)	30/702	4.43937e-05	0.0052299	0	0	2.21425	22.1921	CD274;UHRF1;THY1;BRCA1;TNF;CXCL5;IL18BP;CCL8;CCL7;CHL1;CCL5;UBD;CCL4;SLAMF8;CCL2;SLAMF7;SLAMF6;NRCAM;ICOS;ITGA4;STAT1;GZMA;CRTAM;GZMB;ISG15;LILRB4;CD8A;CD28;CD226;PDCD1
Macacine alphaherpesvirus 1 envelope glycoprotein D (gene: US6)	9/87	4.6061e-05	0.00533275	0	0	5.36001	53.5227	CD274;ITGA4;CD8A;STAT1;UBD;CD226;CD48;SLAMF6;PDCD1
Human betaherpesvirus 6 U85, OX-2 homologue (gene: U85)	22/439	4.85114e-05	0.00552125	0	0	2.59657	25.7936	CD274;ITGA4;STAT1;CRTAM;ISG15;THY1;BRCA1;LILRB4;IL18BP;CCL8;CHL1;CD8A;UBD;SLAMF8;CCL2;SLAMF7;CD226;SLAMF6;NRCAM;PDCD1;ICOS;LAIR1
Human betaherpesvirus 6A membrane glycoprotein UL119 (gene: U85)	22/439	4.85114e-05	0.00542923	0	0	2.59657	25.7936	CD274;ITGA4;STAT1;CRTAM;ISG15;THY1;BRCA1;LILRB4;IL18BP;CCL8;CHL1;CD8A;UBD;SLAMF8;CCL2;SLAMF7;CD226;SLAMF6;NRCAM;PDCD1;ICOS;LAIR1
Human papillomavirus 15 early protein (gene: E7)	6/35	5.02458e-05	0.00553116	0	0	8.88231	87.9223	CCNB1;ITGA4;STAT1;CD8A;UBD;BRCA1
Variola virus hypothetical protein (gene: A41L)	6/35	5.02458e-05	0.00544195	0	0	8.88231	87.9223	ITGA4;STAT1;CD8A;UBD;SLAMF7;BRCA1
Horsepox virus HSPV177 (Immunoglobulin like)	25/538	5.17208e-05	0.00551278	0	0	2.40769	23.7631	CD274;UHRF1;THY1;BRCA1;TNF;IL18BP;CCL7;CCL5;UBD;CCL4;SLAMF8;CCL2;SLAMF7;SLAMF6;ICOS;ITGA4;STAT1;CRTAM;ISG15;LILRB4;CD8A;CD28;TCAP;CD226;PDCD1
Human parechovirus 2C protein (gene: polyprotein)	5/22	5.24125e-05	0.00549922	0	0	11.7758	116.066	ITGA4;STAT1;FIGNL1;BRCA1;TK1
Ectromelia virus ERPV hemagglutinin	16/262	5.39236e-05	0.00557072	0	0	3.16418	31.0974	CD274;ITGA4;STAT1;ISG15;THY1;BRCA1;TNF;CCL8;CD8A;UBD;CD28;RAC2;SLAMF7;CCL2;CD226;ICOS
Vaccinia virus Ankara Haemagglutinin	22/446	6.12718e-05	0.00623394	0	0	2.55582	24.792	CD274;ITGA4;STAT1;CRTAM;ISG15;THY1;BRCA1;TNF;IL18BP;CCL8;CD8A;CCL5;UBD;CCL4;SLAMF8;CD28;CCL2;SLAMF7;CD226;SLAMF6;PDCD1;ICOS
Cowpox virus vCCI or CPXV003 protein (gene: vCCI)	6/37	6.96612e-05	0.00698172	0	0	8.40218	80.4246	CCL8;CCL7;ITGA4;STAT1;CCL5;CCL4
Variola virus hypothetical protein (gene: B1R)	12/161	7.09329e-05	0.00700463	0	0	3.86187	36.8955	CCNA2;ITK;CCNB1;ITGA4;CCNE1;CD8A;STAT1;UBD;PLK1;CDK1;BRCA1;AURKA
Papiine alphaherpesvirus 2 envelope glycoprotein D (gene: US6)	9/92	7.16906e-05	0.00697685	0	0	5.06871	48.3715	CD274;ITGA4;CD8A;STAT1;UBD;CD48;SLAMF6;PDCD1;ICOS
Human papillomavirus 17 early protein (gene: E7)	6/38	8.13885e-05	0.00780748	0	0	8.18107	77.0353	CCNB1;ITGA4;STAT1;CD8A;UBD;BRCA1
Human parechovirus VP1 protein (gene: polyprotein)	4/13	8.50798e-05	0.00804663	0	0	15.9426	149.413	ITGA4;STAT1;CD8A;BRCA1
Human parechovirus 4 capsid protein 1D	4/13	8.50798e-05	0.00793487	0	0	15.9426	149.413	ITGA4;STAT1;CD8A;BRCA1
Human rhinovirus B79 3C	4/13	8.50798e-05	0.00782617	0	0	15.9426	149.413	ITGA4;STAT1;CD8A;BRCA1
Saffold virus capsid protein VP1	4/13	8.50798e-05	0.00772041	0	0	15.9426	149.413	ITGA4;STAT1;CD8A;BRCA1
Human adenovirus 52 E3 CR1-beta1 (gene: E3)	15/244	8.52207e-05	0.00763009	0	0	3.18525	29.8467	CD274;ITGA4;STAT1;CRTAM;ISG15;THY1;BRCA1;LILRB4;CD8A;UBD;SLAMF8;SLAMF7;CD226;SLAMF6;ICOS
Cercopithecine alphaherpesvirus 2 envelope glycoprotein D (gene: US6)	9/95	9.21687e-05	0.00814359	0	0	4.90864	45.6106	CD274;ITGA4;CD8A;STAT1;UBD;CD48;SLAMF6;PDCD1;ICOS
Human papillomavirus type 32 early protein (gene: E7)	6/39	9.46356e-05	0.00825297	0	0	7.9713	73.8579	CCNB1;ITGA4;STAT1;CD8A;UBD;BRCA1
Influenza A virus (A/goose/Guangdong/1/1996(H5N1)) hemagglutinin (gene: HA)	10/118	9.77883e-05	0.00841857	0	0	4.39097	40.5406	GBP6;CD96;CD8A;STAT1;CD226;BRCA1;PDCD1;ICOS;GBP2;GBP4
Human papillomavirus 3 envelope protein (gene: E1)	5/25	0.000100825	0.00857015	0	0	10.3627	95.3588	ITGA4;STAT1;CD8A;BRCA1;TK1
Human papillomavirus type 59 ORF putative E7	5/25	0.000100825	0.00846303	0	0	10.3627	95.3588	CCNB1;ITGA4;STAT1;UBD;BRCA1
Vaccinia virus TNF-alpha-receptor-like protein (gene: C22L)	5/25	0.000100825	0.00835855	0	0	10.3627	95.3588	ITGA4;STAT1;CD8A;BRCA1;TNF
Cowpox virus CPXV169 protein (gene: CPXV169 CDS)	11/143	0.000106576	0.00872755	0	0	3.98565	36.4554	CXCL9;KLRK1;CD72;ITGA4;CD8A;KLRC3;STAT1;CCL5;KLRC1;CLEC4E;CXCL5
Human rhinovirus QCE 3C	6/40	0.000109542	0.00886231	0	0	7.77202	70.8747	ITGA4;STAT1;CD8A;UBD;ISG15;BRCA1
Human gammaherpesvirus 8 K14	11/144	0.000113432	0.00906785	0	0	3.95797	35.9554	ITGA4;CD8A;STAT1;UBD;CRTAM;SLAMF8;CD28;ISG15;BRCA1;ICOS;LILRB4
Cercopithecine betaherpesvirus 5 helicase-primase helicase subunit (gene: UL105)	8/77	0.000117953	0.00931826	0	0	5.38322	48.6924	ITGA4;CD8A;STAT1;UBD;TAP1;BRCA1;HIST2H2AC;HIST1H2AB
Human papillomavirus 138 replication protein (gene: E1)	7/58	0.000121737	0.00950542	0	0	6.25335	56.3655	CD8A;STAT1;BRCA1;TK1;CENPA;HIST2H2AC;HIST1H2AB
Human papillomavirus type 13 E1 (gene: E1)	5/26	0.000122867	0.00948332	0	0	9.96413	89.7211	ITGA4;STAT1;CD8A;BRCA1;TK1
Human papillomavirus type 54 transforming protein (gene: E7)	5/26	0.000122867	0.00937556	0	0	9.96413	89.7211	CCNB1;STAT1;CD8A;UBD;BRCA1
Human parechovirus 6 2C	5/26	0.000122867	0.00927021	0	0	9.96413	89.7211	ITGA4;STAT1;CD8A;BRCA1;TK1
Human rhinovirus A49 2C	5/26	0.000122867	0.00916721	0	0	9.96413	89.7211	STAT1;UBD;BIRC5;BRCA1;TK1
Cowpox virus CPXV175 protein (gene: CPXV175 CDS)	6/41	0.000126253	0.00931634	0	0	7.58246	68.0694	ITGA4;STAT1;CD8A;UBD;CRTAM;BRCA1
Human adenovirus D8 45.5kDa protein (gene: E3)	12/172	0.00013336	0.00973384	0	0	3.61489	32.2537	ITGA4;CD8A;CHL1;STAT1;UBD;CRTAM;SLAMF7;SLAMF6;BRCA1;ECT2;ICOS;IL18BP
Human adenovirus 41 E3 31.6K	22/471	0.000134865	0.00973784	0	0	2.42016	21.5666	CD274;CD96;ITGA4;STAT1;CRTAM;ISG15;THY1;BRCA1;TNF;CD3D;LILRB4;CXCL5;CCL8;CD8A;UBD;CCL4;SLAMF8;SLAMF7;CD226;SLAMF6;PDCD1;ICOS
Human rhinovirus B26 3C	3/6	0.000136626	0.00976006	0	0	25.9067	230.525	ITGA4;STAT1;BRCA1
Human rhinovirus B3 3C (P3-C)	3/6	0.000136626	0.00965732	0	0	25.9067	230.525	ITGA4;STAT1;BRCA1
Human rhinovirus B35 3C	3/6	0.000136626	0.00955672	0	0	25.9067	230.525	ITGA4;STAT1;BRCA1
Human rhinovirus B4 3C (P3-C)	3/6	0.000136626	0.0094582	0	0	25.9067	230.525	ITGA4;STAT1;BRCA1
Human rhinovirus B6 3C (P3-C)	3/6	0.000136626	0.00936169	0	0	25.9067	230.525	ITGA4;STAT1;BRCA1
Human rhinovirus B72 3C	3/6	0.000136626	0.00926713	0	0	25.9067	230.525	ITGA4;STAT1;BRCA1
Human rhinovirus B83 3C	3/6	0.000136626	0.00917445	0	0	25.9067	230.525	ITGA4;STAT1;BRCA1
Human rhinovirus B86 3C	3/6	0.000136626	0.00908362	0	0	25.9067	230.525	ITGA4;STAT1;BRCA1
Human rhinovirus B99 3C	3/6	0.000136626	0.00899456	0	0	25.9067	230.525	ITGA4;STAT1;BRCA1
Human betaherpesvirus 5 membrane glycoprotein UL11 (gene: UL11)	9/100	0.000137133	0.0089403	0	0	4.66321	41.4772	ITGA4;CD8A;STAT1;UBD;CRTAM;SLAMF8;SLAMF7;BRCA1;ICOS
Human papillomavirus type 30 early protein (gene: E7)	6/42	0.000144922	0.00935725	0	0	7.40192	65.4279	CCNB1;ITGA4;STAT1;CD8A;UBD;BRCA1
Monkeypox virus soluble interferon-gamma receptor-like protein	6/42	0.000144922	0.00926814	0	0	7.40192	65.4279	ITGA4;IFNG;STAT1;CD8A;UBD;BRCA1
Monkeypox virus Zaire-96-I-16 B9R (gene: B9R)	6/42	0.000144922	0.0091807	0	0	7.40192	65.4279	ITGA4;IFNG;STAT1;CD8A;UBD;BRCA1
Vaccinia virus putative ATPase (gene: A32L)	6/42	0.000144922	0.0090949	0	0	7.40192	65.4279	STAT1;FIGNL1;UBD;BRCA1;TK1;TRIP13
Human papillomavirus type 10 envelope protein (gene: E1)	5/27	0.000148418	0.00922806	0	0	9.59509	84.5853	ITGA4;STAT1;CD8A;BRCA1;TK1
Influenza A virus (A/New York/392/2004(H3N2)) HA2 (gene: HA)	8/80	0.000154542	0.00952066	0	0	5.18135	45.4665	CD96;CD274;CD8A;STAT1;UBD;BRCA1;THY1;PDCD1
Cowpox virus CPXV202 protein (gene: CPXV202 CDS)	6/43	0.000165712	0.0101159	0	0	7.22979	62.9372	ITGA4;IFNG;STAT1;CD8A;UBD;BRCA1
Human papillomavirus 110 E7 protein (gene: E7)	5/28	0.000177842	0.0107586	0	0	9.25241	79.891	CCNB1;ITGA4;STAT1;UBD;BRCA1
Human parechovirus 6 capsid protein VP0	5/28	0.000177842	0.0106626	0	0	9.25241	79.891	ITGA4;STAT1;CD8A;UBD;ISG15
Echovirus E27 2C	6/44	0.000188788	0.0112187	0	0	7.06547	60.5856	STAT1;FIGNL1;UBD;MCM5;BRCA1;TK1
Dengue virus 3 envelope protein E (gene: flavivirus polyprotein)	7/63	0.000206265	0.0121497	0	0	5.75705	48.8564	ITGA4;CD8A;STAT1;UBD;BRCA1;PDCD1;ICOS
Middle East respiratory syndrome-related coronavirus nsp5 protein (gene: orf1ab)	4/16	0.000206849	0.0120782	0	0	12.9534	109.89	ITGA4;STAT1;ISG15;BRCA1
Human papillomavirus 117 E1	5/29	0.000211515	0.0122441	0	0	8.93336	75.5871	ITGA4;STAT1;CD8A;BRCA1;TK1
Human papillomavirus 94 E1 protein (gene: E1)	5/29	0.000211515	0.0121395	0	0	8.93336	75.5871	ITGA4;STAT1;CD8A;BRCA1;TK1
Human papillomavirus type 45 early protein (gene: E7)	5/29	0.000211515	0.0120366	0	0	8.93336	75.5871	CCNB1;ITGA4;STAT1;UBD;BRCA1
Influenza A virus (A/Korea/426/1968(H2N2)) nonstructural protein 1 (gene: NS1)	6/45	0.000214328	0.0120942	0	0	6.90846	58.3627	ITGA4;STAT1;CD8A;UBD;BRCA1;CENPA
Variola virus hypothetical protein (gene: B9R)	6/45	0.000214328	0.0119934	0	0	6.90846	58.3627	ITGA4;IFNG;STAT1;CD8A;UBD;BRCA1
Human alphaherpesvirus 2 envelope glycoprotein C (gene: UL44)	13/209	0.000222855	0.0123675	0	0	3.22285	27.1009	CD274;ITGA4;STAT1;ISG15;THY1;BRCA1;MEFV;IL18BP;CD8A;UBD;SLAMF7;CD226;ICOS
Yaba-like disease virus 141R protein (gene: 141R)	11/156	0.000229815	0.0126492	0	0	3.65351	30.61	ITGA4;CD8A;STAT1;UBD;CRTAM;SLAMF7;SLAMF6;ISG15;BRCA1;ICOS;TNF
Yaba-like disease virus 123R protein (gene: 123R)	11/156	0.000229815	0.0125464	0	0	3.65351	30.61	CXCL9;KLRK1;CD72;CD8A;KLRC3;STAT1;KLRC1;BRCA1;CLEC4E;TNF;CXCL5
Human rhinovirus A45 3C	3/7	0.000235672	0.0127624	0	0	22.2058	185.486	ITGA4;STAT1;BRCA1
Human rhinovirus B52 3C	3/7	0.000235672	0.0126603	0	0	22.2058	185.486	ITGA4;STAT1;BRCA1
Human rhinovirus B70 3C (P3-C)	3/7	0.000235672	0.0125598	0	0	22.2058	185.486	ITGA4;STAT1;BRCA1
Human rhinovirus B84 3C	3/7	0.000235672	0.0124609	0	0	22.2058	185.486	ITGA4;STAT1;BRCA1
Human rhinovirus B91 3C	3/7	0.000235672	0.0123636	0	0	22.2058	185.486	ITGA4;STAT1;BRCA1
Middle East respiratory syndrome-related coronavirus nsp1 protein (gene: orf1ab)	3/7	0.000235672	0.0122677	0	0	22.2058	185.486	STAT1;ISG15;BRCA1
Rhinovirus B 3C	3/7	0.000235672	0.0121734	0	0	22.2058	185.486	ITGA4;STAT1;BRCA1
Rhinovirus B14 protease 3C	3/7	0.000235672	0.0120804	0	0	22.2058	185.486	ITGA4;STAT1;BRCA1
Rhinovirus B48 3C (P3-C)	3/7	0.000235672	0.0119889	0	0	22.2058	185.486	ITGA4;STAT1;BRCA1
Rhinovirus B69 3C	3/7	0.000235672	0.0118988	0	0	22.2058	185.486	ITGA4;STAT1;BRCA1
Human papillomavirus 154 E1	6/46	0.000242513	0.0121528	0	0	6.75828	56.259	STAT1;CD8A;UBD;BRCA1;TK1;HIST2H2AC
Human papillomavirus FA75/KI88-03 E7 protein (gene: E7)	6/46	0.000242513	0.0120628	0	0	6.75828	56.259	CCNB1;ITGA4;STAT1;CD8A;UBD;BRCA1
Banna virus strain JKT-6423 Vp7	9/108	0.000246384	0.0121652	0	0	4.31779	35.8749	CCNA2;ITK;CCNB1;ITGA4;CCNE1;STAT1;UBD;BRCA1;AURKA
Hepatitis C virus genotype 6 E2 protein	4/17	0.000266392	0.0130571	0	0	12.1914	100.342	ITGA4;STAT1;CD8A;BRCA1
Human papillomavirus type 81 E1 protein (gene: E1)	4/17	0.000266392	0.0129625	0	0	12.1914	100.342	STAT1;CD8A;BRCA1;TK1
Human adenovirus 23 CR1 b protein (gene: E3)	10/135	0.000295996	0.0142994	0	0	3.83803	31.1847	ITGA4;CD8A;CHL1;STAT1;UBD;CRTAM;SLAMF7;BRCA1;ECT2;IL18BP
Human papillomavirus 4 hypothetical protein	7/67	0.000303525	0.0145583	0	0	5.41335	43.8484	ITGA4;CD8A;STAT1;UBD;BRCA1;TK1;ECT2
Human papillomavirus type 16 transforming protein (gene: E7)	6/48	0.000307584	0.0146484	0	0	6.47668	52.3754	CCNB1;ITGA4;STAT1;CD8A;UBD;BRCA1
Molluscum contagiosum virus subtype 1 MC080R (gene: MC080R)	20/434	0.000321241	0.0151911	0	0	2.38772	19.2052	CD274;CD96;CD72;ITGA4;STAT1;THY1;BRCA1;LILRB4;FYB;HIST2H2AC;IL18BP;KLRK1;CD8A;UBD;CD226;PDCD1;KLRC1;ICOS;LAIR1;HIST1H2AB
Influenza A virus (A/Korea/426/1968(H2N2)) hemagglutinin (gene: HA)	7/68	0.000332827	0.0156289	0	0	5.33374	42.712	CD274;ITGA4;CD8A;STAT1;THY1;PDCD1;ICOS
Human adenovirus 31 cr1 beta protein (gene: E3 cr1 beta)	25/607	0.000334731	0.0156092	0	0	2.134	17.0766	CD274;TNXB;UHRF1;THY1;BRCA1;TNF;IL18BP;CCL8;UBD;SLAMF8;SLAMF7;SLAMF6;ICOS;LAIR1;CD96;ITGA4;STAT1;CRTAM;GZMB;ISG15;LILRB4;CD8A;CD28;CD226;PDCD1
Human papillomavirus type XS2 E1 (gene: E1)	4/18	0.000337312	0.0156211	0	0	11.5141	92.0495	ITGA4;STAT1;BRCA1;TK1
Human parechovirus 1 VP1	4/18	0.000337312	0.0155141	0	0	11.5141	92.0495	ITGA4;STAT1;CD8A;BRCA1
Human parechovirus 6 capsid protein VP1	4/18	0.000337312	0.0154085	0	0	11.5141	92.0495	ITGA4;STAT1;CD8A;BRCA1
Human rhinovirus A62 2C	4/18	0.000337312	0.0153044	0	0	11.5141	92.0495	STAT1;UBD;BRCA1;TK1
Middle East respiratory syndrome-related coronavirus nsp9 protein (gene: orf1ab)	4/18	0.000337312	0.0152017	0	0	11.5141	92.0495	STAT1;CD8A;UBD;ISG15
Human papillomavirus 104 E7 protein (gene: E7)	5/32	0.000342037	0.0153119	0	0	8.09585	64.6097	CCNB1;ITGA4;STAT1;UBD;BRCA1
Human papillomavirus type 25 early protein (gene: E7)	5/32	0.000342037	0.0152105	0	0	8.09585	64.6097	ITGA4;STAT1;CD8A;UBD;BRCA1
Human papillomavirus type 6b E1 (gene: E1)	5/32	0.000342037	0.0151104	0	0	8.09585	64.6097	ITGA4;STAT1;CD8A;BRCA1;TK1
Human rhinovirus A88 2C (P2-C)	5/32	0.000342037	0.0150116	0	0	8.09585	64.6097	STAT1;FIGNL1;UBD;BRCA1;TK1
Orf virus ORF108 DNA packaging protein/ATPase	5/32	0.000342037	0.0149142	0	0	8.09585	64.6097	ITGA4;STAT1;UBD;TAP1;TK1
Human papillomavirus 107 E7 protein (gene: E7)	6/49	0.000344871	0.0149407	0	0	6.34451	50.5806	CCNB1;ITGA4;CD8A;STAT1;UBD;BRCA1
Papiine alphaherpesvirus 2 envelope glycoprotein C (gene: UL44)	16/308	0.000345738	0.0148822	0	0	2.69161	21.4517	CD274;ITGA4;STAT1;CRTAM;ISG15;THY1;BRCA1;MEFV;IL18BP;CD8A;UBD;SLAMF8;CD28;SLAMF7;CD226;ICOS
Human adenovirus 46 423R	8/90	0.000349721	0.0149578	0	0	4.60564	36.6534	ITGA4;CD8A;STAT1;UBD;CRTAM;BRCA1;ECT2;ICOS
Human adenovirus 71 E3 CR1-beta (gene: E3)	8/90	0.000349721	0.0148631	0	0	4.60564	36.6534	ITGA4;CD8A;STAT1;UBD;CRTAM;CD226;BRCA1;ECT2
Human metapneumovirus RNA dependent RNA polymerase (gene: L)	3/8	0.00037168	0.0156971	0	0	19.4301	153.448	ITGA4;STAT1;BRCA1
Horsepox virus HSPV189 (Serine/threonine protein kinase)	10/139	0.000374101	0.0157005	0	0	3.72759	29.4143	CCNA2;ITK;CCNB1;ITGA4;STAT1;UBD;PLK1;CDK1;BRCA1;HIST1H2AB
Vaccinia virus IEV and EEV membrane glycoprotein (gene: A34R)	10/139	0.000374101	0.015603	0	0	3.72759	29.4143	CXCL9;KLRK1;CD72;ITGA4;CD8A;KLRC3;STAT1;KLRC1;CLEC4E;CXCL5
Horsepox virus HSPV153 (Poxvirus A32 protein)	6/50	0.000385605	0.0159836	0	0	6.21762	48.8748	STAT1;FIGNL1;UBD;BRCA1;TK1;TRIP13
Coxsackievirus B5 helicase, polyprotein region 7 (gene: 1A)	5/33	0.000396791	0.0163463	0	0	7.85053	61.4861	STAT1;FIGNL1;UBD;BRCA1;TK1
Human papillomavirus type 49 E7 protein (gene: E7)	5/33	0.000396791	0.0162466	0	0	7.85053	61.4861	CCNB1;STAT1;CD8A;UBD;BRCA1
Human rhinovirus A22 2C	5/33	0.000396791	0.0161482	0	0	7.85053	61.4861	STAT1;FIGNL1;UBD;BRCA1;TK1
Influenza A virus (A/Shanghai/02/2013(H7N9)) neuraminidase (gene: NA)	5/33	0.000396791	0.0160509	0	0	7.85053	61.4861	CD274;CD96;CD8A;CD226;THY1
Reston ebolavirus - Reston VP35 (gene: VP35)	5/33	0.000396791	0.0159548	0	0	7.85053	61.4861	ITGA4;STAT1;CD8A;UBD;ISG15
Human adenovirus 43 CR1-beta protein (gene: E3)	8/92	0.000406174	0.0162349	0	0	4.50552	35.1824	ITGA4;CD8A;STAT1;CRTAM;SLAMF7;BRCA1;ECT2;ICOS
Vaccinia virus ser/thr protein kinase-like protein (gene: B12R)	11/167	0.000412911	0.0164065	0	0	3.41286	26.594	CCNA2;ITK;CCNB1;ITGA4;CD8A;STAT1;UBD;PLK1;CDK1;BRCA1;AURKA
Heartland virus full_polyprotein 1..1076	4/19	0.00042079	0.0166212	0	0	10.9081	84.7928	ITGA4;STAT1;CD8A;BRCA1
Human papillomavirus 120 putative E1 protein (gene: E1)	4/19	0.00042079	0.016524	0	0	10.9081	84.7928	STAT1;CD8A;BRCA1;TK1
Human papillomavirus 120 replication protein E1 (gene: E1)	4/19	0.00042079	0.0164279	0	0	10.9081	84.7928	STAT1;CD8A;BRCA1;TK1
Human papillomavirus 125 putative E1 protein (gene: E1)	4/19	0.00042079	0.016333	0	0	10.9081	84.7928	ITGA4;STAT1;BRCA1;TK1
SARS coronavirus 3C-like proteinase (gene: orf1ab)	4/19	0.00042079	0.0162391	0	0	10.9081	84.7928	ITGA4;STAT1;ISG15;BRCA1
SFTS virus HB29 Gc glycoprotein	4/19	0.00042079	0.0161463	0	0	10.9081	84.7928	ITGA4;STAT1;CD8A;BRCA1
Yaba monkey tumor virus 121L	4/19	0.00042079	0.0160546	0	0	10.9081	84.7928	ITGA4;STAT1;TAP1;TK1
Hepatitis C virus subtype 2k/1b full_polyprotein 1..3010	7/71	0.000434572	0.0164867	0	0	5.10837	39.5447	ITGA4;CD8A;STAT1;UBD;BRCA1;HIST2H2AC;HIST1H2AB
Human betaherpesvirus 5 membrane glycoprotein UL7 (gene: UL7)	9/117	0.000447078	0.0168659	0	0	3.98565	30.7404	ITGA4;CD8A;STAT1;UBD;CRTAM;SLAMF7;CD226;BRCA1;ICOS
Cercopithecine betaherpesvirus 5 membrane glycoprotein UL141 (gene: UL141)	5/34	0.000457907	0.0171779	0	0	7.61963	58.5861	ITGA4;STAT1;CD8A;UBD;BRCA1
Cosavirus A 3C	5/34	0.000457907	0.0170825	0	0	7.61963	58.5861	ITGA4;STAT1;FIGNL1;BRCA1;TK1
Echovirus E25 2C	5/34	0.000457907	0.0169881	0	0	7.61963	58.5861	STAT1;FIGNL1;UBD;BRCA1;TK1
Human adenovirus Chiba_E086/2012 CR1-b (gene: E3)	5/34	0.000457907	0.0168948	0	0	7.61963	58.5861	STAT1;CD8A;UBD;BRCA1;ECT2
Human papillomavirus 116 E7 protein	5/34	0.000457907	0.0168025	0	0	7.61963	58.5861	ITGA4;STAT1;CD8A;UBD;BRCA1
Human papillomavirus type 7 early protein (gene: E7)	5/34	0.000457907	0.0167111	0	0	7.61963	58.5861	ITGA4;STAT1;CD8A;UBD;BRCA1
Human rhinovirus B35 2C	5/34	0.000457907	0.0166208	0	0	7.61963	58.5861	STAT1;FIGNL1;UBD;BRCA1;TK1
Human polyomavirus 9 large T antigen	7/72	0.000473517	0.017095	0	0	5.03742	38.5631	CD8A;STAT1;UBD;BRCA1;TK1;HIST2H2AC;HIST1H2AB
Human polyomavirus IPPyV large T antigen protein (gene: large T antigen)	7/72	0.000473517	0.0170036	0	0	5.03742	38.5631	CD8A;STAT1;UBD;BRCA1;TK1;HIST2H2AC;HIST1H2AB
Monkeypox virus Zaire-96-I-16 B11R (gene: B11R)	9/118	0.000475918	0.0169989	0	0	3.95187	30.2329	CCNA2;ITK;CCNB1;ITGA4;STAT1;PLK1;CDK1;BRCA1;AURKA
Human adenovirus 1 IVa2	6/52	0.000478288	0.0169931	0	0	5.97848	45.7072	ITGA4;STAT1;UBD;TAP1;BRCA1;TK1
Human papillomavirus 17 early protein (gene: E1)	7/73	0.000515193	0.018208	0	0	4.96842	37.6157	STAT1;CDK1;BRCA1;TK1;CENPA;HIST2H2AC;HIST1H2AB
Coxsackievirus A8 2C protein	4/20	0.000518024	0.0182122	0	0	10.3627	78.3988	STAT1;UBD;BRCA1;TK1
Human rhinovirus A31 2C	4/20	0.000518024	0.0181174	0	0	10.3627	78.3988	STAT1;FIGNL1;BRCA1;TK1
Human rhinovirus A85 2C	4/20	0.000518024	0.0180235	0	0	10.3627	78.3988	STAT1;FIGNL1;BRCA1;TK1
Human papillomavirus 139 transforming protein (gene: E7)	5/35	0.000525851	0.0182015	0	0	7.40192	55.8882	ITGA4;STAT1;CD8A;UBD;BRCA1
Human papillomavirus KC5 E7 (gene: E7)	5/35	0.000525851	0.0181082	0	0	7.40192	55.8882	ITGA4;STAT1;CD8A;UBD;BRCA1
Human papillomavirus type 163 E1 (gene: E1)	5/35	0.000525851	0.0180158	0	0	7.40192	55.8882	STAT1;UBD;BRCA1;TK1;ECT2
Human rhinovirus A68 2C	5/35	0.000525851	0.0179243	0	0	7.40192	55.8882	STAT1;FIGNL1;UBD;BRCA1;TK1
Norovirus Hu/GII.4/Woonona/NSW3309/2012/AU VP1	5/35	0.000525851	0.0178338	0	0	7.40192	55.8882	ITGA4;STAT1;CD8A;UBD;BRCA1
Enterovirus C109 3C	3/9	0.000549551	0.0185439	0	0	17.2712	129.644	CD8A;STAT1;BRCA1
Human betaherpesvirus 7 nuclear egress membrane protein (gene: U34)	3/9	0.000549551	0.0184512	0	0	17.2712	129.644	CD8A;STAT1;BRCA1
Yaba-like disease virus 20L protein (gene: 20L)	3/9	0.000549551	0.0183594	0	0	17.2712	129.644	RRM2;STAT1;BRCA1
Human papillomavirus 173 E1	7/74	0.000559739	0.0186072	0	0	4.90127	36.7009	CD8A;STAT1;UBD;BRCA1;TK1;HIST2H2AC;HIST1H2AB
Human papillomavirus type 34 early protein (gene: E7)	7/74	0.000559739	0.0185155	0	0	4.90127	36.7009	CCNA2;CCNB1;ITGA4;CD8A;UBD;CCNF;BRCA1
Influenza A virus (A/New York/392/2004(H3N2)) hemagglutinin (gene: HA)	7/74	0.000559739	0.0184247	0	0	4.90127	36.7009	CD274;CD8A;STAT1;UBD;BRCA1;THY1;ICOS
Molluscum contagiosum virus subtype 1 MC162R (gene: MC162R)	10/147	0.000582272	0.0190729	0	0	3.52473	26.2542	ITGA4;CD8A;CHL1;STAT1;UBD;CRTAM;SLAMF8;SLAMF7;BRCA1;ICOS
Human papillomavirus type 63 hypothetical protein	6/54	0.000587454	0.0191493	0	0	5.75705	42.8308	ITGA4;CD8A;STAT1;UBD;BRCA1;TK1
Salivirus FHB full_polyprotein 1..2365	6/54	0.000587454	0.0190568	0	0	5.75705	42.8308	ITGA4;CD8A;STAT1;BRCA1;HIST2H2AC;HIST1H2AB
Human alphaherpesvirus 3 ribonucleotide reductase subunit 2 (gene: ORF18)	5/36	0.000601098	0.0194057	0	0	7.19632	53.3733	RRM2;ITGA4;STAT1;UBD;BRCA1
Human herpesvirus 3 strain Dumas ribonucleotide reductase (small subunit)	5/36	0.000601098	0.0193128	0	0	7.19632	53.3733	RRM2;ITGA4;STAT1;UBD;BRCA1
Human papillomavirus 126 hypothetical protein (gene: HpV126gp2)	5/36	0.000601098	0.0192208	0	0	7.19632	53.3733	ITGA4;STAT1;CD8A;UBD;BRCA1
Human papillomavirus 133 E1 (gene: E1)	5/36	0.000601098	0.0191297	0	0	7.19632	53.3733	STAT1;CD8A;UBD;BRCA1;TK1
Human papillomavirus 5 replication protein (gene: E1)	5/36	0.000601098	0.0190395	0	0	7.19632	53.3733	STAT1;CD8A;UBD;BRCA1;TK1
Human rhinovirus A50 1D	5/36	0.000601098	0.0189501	0	0	7.19632	53.3733	ITGA4;STAT1;CD8A;UBD;BRCA1
Human rhinovirus A9 2C	5/36	0.000601098	0.0188616	0	0	7.19632	53.3733	STAT1;FIGNL1;UBD;BRCA1;TK1
Norovirus GII/Hu/JP/2007/GII.P7_GII.14/Fukuoka/KK282 VP1 (gene: VP1)	5/36	0.000601098	0.0187738	0	0	7.19632	53.3733	ITGA4;STAT1;CD8A;UBD;BRCA1
Norovirus Hu/GII.4/5M/USA/2004 VP1	5/36	0.000601098	0.0186869	0	0	7.19632	53.3733	ITGA4;STAT1;CD8A;UBD;BRCA1
Norovirus Hu/GII.4/CHDC4871/1977/US VP1	5/36	0.000601098	0.0186008	0	0	7.19632	53.3733	ITGA4;STAT1;CD8A;UBD;BRCA1
Norovirus Hu/GII.4/CHDC5191/1974/USA capsid protein VP1 (gene: VP1)	5/36	0.000601098	0.0185155	0	0	7.19632	53.3733	ITGA4;STAT1;CD8A;UBD;BRCA1
Orf virus ORF025 DNA polymerase	5/36	0.000601098	0.0184309	0	0	7.19632	53.3733	ITGA4;STAT1;CD8A;UBD;BRCA1
Human TMEV-like cardiovirus protein 2C	4/21	0.000630231	0.0192364	0	0	9.86923	72.7306	ITGA4;STAT1;BRCA1;TK1
Human cosavirus E VP3	4/21	0.000630231	0.0191493	0	0	9.86923	72.7306	ITGA4;STAT1;CD8A;BRCA1
Human mastadenovirus F control protein E4orf3 (gene: E4)	4/21	0.000630231	0.0190631	0	0	9.86923	72.7306	STAT1;CD8A;UBD;BRCA1
Human papillomavirus 9 early protein (gene: E7)	4/21	0.000630231	0.0189776	0	0	9.86923	72.7306	CCNB1;ITGA4;STAT1;BRCA1
Human papillomavirus type 97 E7 protein	4/21	0.000630231	0.0188929	0	0	9.86923	72.7306	CCNB1;ITGA4;UBD;BRCA1
Human adenovirus 61 E3 CR1 beta	18/391	0.000639687	0.0190911	0	0	2.38527	17.5426	CD274;ITGA4;STAT1;CRTAM;ISG15;THY1;BRCA1;TNF;LILRB4;CD8A;UBD;SLAMF8;CD28;SLAMF7;CD226;SLAMF6;PDCD1;ICOS
Human adenovirus 5 IVa2	6/55	0.000648815	0.0192779	0	0	5.65238	41.4905	ITGA4;STAT1;UBD;TAP1;BRCA1;TK1
Adeno-associated virus 3B capsid protein VP1	5/37	0.000684136	0.0202378	0	0	7.00182	51.0247	ITGA4;STAT1;CD8A;BRCA1;THY1
Human papillomavirus type 112 E7 protein (gene: E7)	5/37	0.000684136	0.020149	0	0	7.00182	51.0247	ITGA4;STAT1;CD8A;UBD;BRCA1
Human papillomavirus type 43 E7 protein (gene: E7)	5/37	0.000684136	0.020061	0	0	7.00182	51.0247	ITGA4;STAT1;CD8A;UBD;BRCA1
Human papillomavirus type 68b E7 protein (gene: E7)	5/37	0.000684136	0.0199738	0	0	7.00182	51.0247	CCNB1;ITGA4;CD8A;UBD;BRCA1
Norovirus GII/Hu/HKG/2013/GII.4/CUHK-NS-141 VP1	5/37	0.000684136	0.0198873	0	0	7.00182	51.0247	ITGA4;STAT1;CD8A;UBD;BRCA1
Norovirus Hu/GII.12/CGMH38/2010/TW VP1	5/37	0.000684136	0.0198016	0	0	7.00182	51.0247	C1QB;ITGA4;STAT1;CD8A;BRCA1
Norovirus Hu/GII.14/8610/Saga/2008/JPN capsid protein	5/37	0.000684136	0.0197166	0	0	7.00182	51.0247	ITGA4;STAT1;CD8A;UBD;BRCA1
Norovirus Hu/GII.4/HS191/2004/USA VP1	5/37	0.000684136	0.0196324	0	0	7.00182	51.0247	ITGA4;STAT1;CD8A;UBD;BRCA1
Norovirus Hu/GII.4/HS66/2001/USA capsid protein VP1 (gene: VP1)	5/37	0.000684136	0.0195488	0	0	7.00182	51.0247	ITGA4;STAT1;CD8A;UBD;BRCA1
Norovirus Hu/GII.4/Jiangsu2/2012/CHN major capsid protein	5/37	0.000684136	0.019466	0	0	7.00182	51.0247	ITGA4;STAT1;CD8A;UBD;BRCA1
Norovirus Hu/GII.4/gg-12-08-04/2012/KR major capsid protein	5/37	0.000684136	0.0193839	0	0	7.00182	51.0247	ITGA4;STAT1;CD8A;UBD;BRCA1
Human adenovirus D37 48.9 kDa (gene: E3)	12/206	0.000692428	0.0195364	0	0	3.01826	21.9588	ITGA4;STAT1;CD8A;UBD;CRTAM;SLAMF7;SLAMF6;BRCA1;PDCD1;ICOS;ECT2;IL18BP
Influenza A virus (A/New York/599/1996(H3N2)) HA2 (gene: HA)	7/77	0.000712003	0.0200046	0	0	4.71032	34.1377	CD96;CD274;CD8A;STAT1;UBD;THY1;PDCD1
Influenza A virus (A/New York/602/1996(H3N2)) HA2 (gene: HA)	7/77	0.000712003	0.0199213	0	0	4.71032	34.1377	CD96;CD274;CD8A;STAT1;UBD;THY1;PDCD1
Horsepox virus HSPV185 (Interferon gamma receptor IFNGR1)	6/56	0.000715027	0.0199229	0	0	5.55144	40.2102	ITGA4;IFNG;CD8A;STAT1;UBD;BRCA1
Human adenovirus 2 IVa2	6/56	0.000715027	0.0198405	0	0	5.55144	40.2102	ITGA4;STAT1;UBD;TAP1;BRCA1;TK1
Human mastadenovirus C encapsidation protein IVa2 (gene: IVa2)	6/56	0.000715027	0.0197589	0	0	5.55144	40.2102	ITGA4;STAT1;UBD;TAP1;BRCA1;TK1
Human mastadenovirus D membrane glycoprotein E3 CR1-beta (gene: E3)	11/179	0.000738759	0.020331	0	0	3.18407	22.9588	ITGA4;CD8A;CHL1;STAT1;UBD;CRTAM;SLAMF6;BRCA1;ECT2;ICOS;IL18BP
Human betaherpesvirus 5 membrane protein UL6 (gene: UL6)	10/152	0.000755414	0.0207045	0	0	3.40878	24.5032	CD274;ITGA4;CD8A;STAT1;UBD;CRTAM;CD226;BRCA1;ICOS;LILRB4
Human alphaherpesvirus 1 DNA polymerase processivity subunit (gene: UL42)	4/22	0.000758635	0.0207083	0	0	9.42063	67.6777	ITGA4;STAT1;CD8A;BRCA1
Human papillomavirus 120 putative E7 protein (gene: E7)	4/22	0.000758635	0.0206244	0	0	9.42063	67.6777	ITGA4;STAT1;UBD;BRCA1
Human papillomavirus type 102 E1 protein	4/22	0.000758635	0.0205413	0	0	9.42063	67.6777	STAT1;CD8A;BRCA1;TK1
Human papillomavirus type 40 early protein (gene: E1)	4/22	0.000758635	0.0204588	0	0	9.42063	67.6777	STAT1;CD8A;BRCA1;TK1
Human papillomavirus type 96 E1	4/22	0.000758635	0.0203769	0	0	9.42063	67.6777	STAT1;CD8A;BRCA1;TK1
Human parechovirus 1 2C	4/22	0.000758635	0.0202958	0	0	9.42063	67.6777	ITGA4;STAT1;GSTA2;BRCA1
Human rhinovirus A23 2C (P2-C)	4/22	0.000758635	0.0202152	0	0	9.42063	67.6777	STAT1;FIGNL1;BRCA1;TK1
Human rhinovirus A82 2C	4/22	0.000758635	0.0201353	0	0	9.42063	67.6777	STAT1;FIGNL1;BRCA1;TK1
Measles virus strain MVi/New Jersey.USA/45.05 hemagglutinin protein (gene: H)	4/22	0.000758635	0.0200561	0	0	9.42063	67.6777	CD96;SLAMF8;CD48;BRCA1
Monkeypox virus Zaire-96-I-16 G7R (gene: G7R)	4/22	0.000758635	0.0199774	0	0	9.42063	67.6777	STAT1;CD8A;UBD;BRCA1
Monkeypox virus ribonucleotide reductase small subunit	3/10	0.000773861	0.0202987	0	0	15.544	111.359	RRM2;STAT1;BRCA1
Monkeypox virus Zaire-96-I-16 C10L (gene: C10L)	3/10	0.000773861	0.0202198	0	0	15.544	111.359	RRM2;STAT1;BRCA1
Vaccinia virus ribonucleotide reductase small subunit (gene: F4L)	3/10	0.000773861	0.0201414	0	0	15.544	111.359	RRM2;STAT1;BRCA1
Horsepox virus HSPV160 (CD47 immunoglobulin-like domain)	5/38	0.000775462	0.0201051	0	0	6.81756	48.8277	ITGA4;STAT1;CD8A;UBD;BRCA1
Human rhinovirus A28 2C (P2-C)	5/38	0.000775462	0.0200278	0	0	6.81756	48.8277	STAT1;FIGNL1;UBD;BRCA1;TK1
Human rhinovirus A78 2C	5/38	0.000775462	0.0199511	0	0	6.81756	48.8277	ITGA4;STAT1;FIGNL1;BRCA1;TK1
Norovirus GII/Hu/TW/2012/GII.Pe_GII.4_Sydney2012/Taipei/105 VP1 (gene: VP1)	5/38	0.000775462	0.0198749	0	0	6.81756	48.8277	ITGA4;STAT1;CD8A;UBD;BRCA1
Norovirus GII/Hu/TW/2012/GII.Pe_GII.4_Sydney2012/Taipei/106 VP1 (gene: VP1)	5/38	0.000775462	0.0197993	0	0	6.81756	48.8277	ITGA4;STAT1;CD8A;UBD;BRCA1
Norovirus Hu/GII.4/CHDC2094/1974/US VP1	5/38	0.000775462	0.0197243	0	0	6.81756	48.8277	ITGA4;STAT1;CD8A;UBD;BRCA1
Norovirus Hu/GII.4/Jingzhou/2013403/CHN major capsid protein VP1	5/38	0.000775462	0.0196499	0	0	6.81756	48.8277	ITGA4;STAT1;CD8A;UBD;BRCA1
Norovirus Hu/GII.4/MD-2004/2004/US VP1	5/38	0.000775462	0.019576	0	0	6.81756	48.8277	ITGA4;STAT1;CD8A;UBD;BRCA1
Norovirus Hu/GII/BG1C0405/2012/BGD capsid protein VP1 (gene: VP1)	5/38	0.000775462	0.0195027	0	0	6.81756	48.8277	ITGA4;STAT1;CD8A;UBD;BRCA1
SARS coronavirus hypothetical protein sars7a	5/38	0.000775462	0.0194299	0	0	6.81756	48.8277	ITGA4;STAT1;CD8A;UBD;BRCA1
SARS coronavirus P2 hypothetical protein sars7a	5/38	0.000775462	0.0193577	0	0	6.81756	48.8277	ITGA4;STAT1;CD8A;UBD;BRCA1
SARS coronavirus Tor2 Orf8	5/38	0.000775462	0.019286	0	0	6.81756	48.8277	ITGA4;STAT1;CD8A;UBD;BRCA1
Vaccinia virus double-strand RNA-binding protein (gene: E3L)	6/57	0.000786345	0.0194845	0	0	5.45405	38.9862	CD8A;STAT1;UBD;BRCA1;HIST2H2AC;HIST1H2AB
Yaba monkey tumor virus Ig domain OX-2-like protein	11/181	0.000809701	0.0199895	0	0	3.14889	22.4164	CCL8;ITGA4;CCL7;CD8A;STAT1;UBD;CRTAM;SLAMF7;BRCA1;ICOS;TNF
Human parainfluenza virus 1 strain Washington/1964 phosphoprotein (gene: P)	8/102	0.000810176	0.0199279	0	0	4.0638	28.9272	ITGA4;CD8A;STAT1;UBD;ISG15;BRCA1;HIST1H2AB;HIST2H2AC
Human respirovirus 1 phosphoprotein (gene: P)	8/102	0.000810176	0.0198552	0	0	4.0638	28.9272	ITGA4;CD8A;STAT1;UBD;ISG15;BRCA1;HIST1H2AB;HIST2H2AC
Hepatitis C virus subtype 2k full_polyprotein 1..3033	7/79	0.000830516	0.0202797	0	0	4.59107	32.5666	ITGA4;CD8A;STAT1;UBD;BRCA1;HIST2H2AC;HIST1H2AB
Human alphaherpesvirus 3 large tegument protein (gene: ORF22)	7/79	0.000830516	0.0202062	0	0	4.59107	32.5666	ITGA4;UHRF1;STAT1;UBD;ISG15;BRCA1;HIST1H2AB
Human herpesvirus 3 strain Dumas Large tegument protein deneddylase (gene: ORF22)	7/79	0.000830516	0.0201333	0	0	4.59107	32.5666	ITGA4;UHRF1;STAT1;UBD;ISG15;BRCA1;HIST1H2AB
Human adenovirus 23 IVa2 (gene: IVa2)	5/39	0.000875584	0.0211494	0	0	6.64275	46.7691	STAT1;UBD;TAP1;BRCA1;TK1
Human adenovirus 49 pIVa2	5/39	0.000875584	0.0210736	0	0	6.64275	46.7691	STAT1;UBD;TAP1;BRCA1;TK1
Human alphaherpesvirus 3 helicase-primase helicase subunit (gene: ORF55)	5/39	0.000875584	0.0209984	0	0	6.64275	46.7691	ITGA4;STAT1;TAP1;BRCA1;TK1
Human calicivirus NLV/GII/Langen1061/2002/DE major structural protein	5/39	0.000875584	0.0209236	0	0	6.64275	46.7691	ITGA4;STAT1;CD8A;UBD;BRCA1
Human papillomavirus 130 E1 (gene: E1)	5/39	0.000875584	0.0208494	0	0	6.64275	46.7691	STAT1;CD8A;UBD;BRCA1;TK1
Human rhinovirus A64 2C	5/39	0.000875584	0.0207758	0	0	6.64275	46.7691	STAT1;FIGNL1;UBD;BRCA1;TK1
Norovirus GII/Hu/JP/2007/GII.P7_GII.14/Sendai/YG99 VP1 (gene: VP1)	5/39	0.000875584	0.0207026	0	0	6.64275	46.7691	ITGA4;STAT1;CD8A;UBD;BRCA1
Norovirus Hu/GII.4/Ohio/7I/2012/USA major capsid protein	5/39	0.000875584	0.02063	0	0	6.64275	46.7691	ITGA4;STAT1;CD8A;UBD;BRCA1
Norovirus Hu/Norwalk/10328/2010/VNM capsid protein VP1 (gene: VP1)	5/39	0.000875584	0.0205578	0	0	6.64275	46.7691	ITGA4;STAT1;CD8A;UBD;BRCA1
Sapovirus Hu/G1/BE-HPI01/DE/2012 excised_polyprotein 1..1719	5/39	0.000875584	0.0204862	0	0	6.64275	46.7691	ITGA4;STAT1;MCM5;BRCA1;TK1
Alphapapillomavirus 7 E7 protein (gene: E7)	4/23	0.000904472	0.0210886	0	0	9.01104	63.1508	CCNB1;ITGA4;UBD;BRCA1
Coxsackievirus A22 2c	4/23	0.000904472	0.0210157	0	0	9.01104	63.1508	STAT1;FIGNL1;BRCA1;TK1
Enterovirus D NTPase 2C	4/23	0.000904472	0.0209432	0	0	9.01104	63.1508	STAT1;UBD;BRCA1;TK1
Human papillomavirus type 18 E7 protein (gene: E7)	4/23	0.000904472	0.0208712	0	0	9.01104	63.1508	CCNB1;ITGA4;UBD;BRCA1
Human papillomavirus type 27 early protein (gene: E1)	4/23	0.000904472	0.0207998	0	0	9.01104	63.1508	STAT1;CD8A;BRCA1;TK1
Human rhinovirus A34 1B	4/23	0.000904472	0.0207288	0	0	9.01104	63.1508	ITGA4;STAT1;CD8A;BRCA1
Mengo virus 2C	4/23	0.000904472	0.0206583	0	0	9.01104	63.1508	ITGA4;STAT1;BRCA1;TK1
Monkeypox virus Zaire-96-I-16 Tumor necrosis Factor-receptor like protein (gene: K1R)	4/23	0.000904472	0.0205882	0	0	9.01104	63.1508	STAT1;CD8A;BRCA1;TNF
Sindbis virus capsid (c) protein	4/23	0.000904472	0.0205187	0	0	9.01104	63.1508	ITGA4;STAT1;CD8A;BRCA1
Human alphaherpesvirus 2 helicase-primase helicase subunit (gene: UL5)	6/59	0.000945352	0.0213739	0	0	5.26917	36.6942	ITGA4;CD8A;STAT1;UBD;TAP1;BRCA1
Influenza A virus (A/Northern Territory/60/1968(H3N2)) hemagglutinin (gene: HA)	7/81	0.000964078	0.0217241	0	0	4.47771	31.0947	CD274;CD8A;STAT1;UBD;BRCA1;THY1;ICOS
Horsepox virus HSPV162	12/214	0.000965742	0.0216888	0	0	2.90543	20.1713	CXCL9;KLRK1;CD72;CCL8;ITGA4;STAT1;CD8A;KLRC3;UBD;KLRC1;CLEC4E;CXCL5
Monkeypox virus ser/thr protein kinase-like protein	8/105	0.000979977	0.0219351	0	0	3.94769	27.3495	CCNA2;ITK;CCNB1;ITGA4;STAT1;PLK1;BRCA1;AURKA
Sosuga virus phosphoprotein	8/105	0.000979977	0.0218623	0	0	3.94769	27.3495	STAT1;UBD;BRCA1;PDCD1;ICOS;MXD3;HIST1H2AB;HIST2H2AC
Echovirus E29 2C	5/40	0.000985019	0.021902	0	0	6.47668	44.8371	STAT1;FIGNL1;UBD;BRCA1;TK1
Human adenovirus 19 pIVa2 (gene: IVa2)	5/40	0.000985019	0.0218297	0	0	6.47668	44.8371	STAT1;UBD;TAP1;BRCA1;TK1
Human adenovirus 71 maturation protein (gene: IVa2)	5/40	0.000985019	0.0217579	0	0	6.47668	44.8371	STAT1;UBD;TAP1;BRCA1;TK1
Human papillomavirus type 41 hypothetical protein (gene: ORF E7)	5/40	0.000985019	0.0216866	0	0	6.47668	44.8371	ITGA4;STAT1;CD8A;UBD;BRCA1
Human papillomavirus type 69 E7	5/40	0.000985019	0.0216157	0	0	6.47668	44.8371	CCNB1;ITGA4;CD8A;UBD;BRCA1
Macacine alphaherpesvirus 1 deoxyuridine triphosphatase (gene: UL50)	5/40	0.000985019	0.0215453	0	0	6.47668	44.8371	ITGA4;STAT1;CD8A;UBD;BRCA1
Norovirus GII/Hu/JP/2002/GII.P12_GII.13/Saitama/T80 VP1 (gene: VP1)	5/40	0.000985019	0.0214753	0	0	6.47668	44.8371	ITGA4;STAT1;CD8A;UBD;BRCA1
Norovirus GII/Hu/JP/2010/GII.P7_GII.7/Musashimurayama/TAKAsanKimchi VP1 (gene: VP1)	5/40	0.000985019	0.0214058	0	0	6.47668	44.8371	ITGA4;STAT1;CD8A;UBD;BRCA1
Norovirus Hu/GII-4/CGMH19/2009/TW major viral capsid protein (gene: VP1)	5/40	0.000985019	0.0213368	0	0	6.47668	44.8371	ITGA4;STAT1;CD8A;UBD;BRCA1
Norovirus Hu/GII/Seoul1367/KOR/2010 major capsid protein	5/40	0.000985019	0.0212682	0	0	6.47668	44.8371	ITGA4;STAT1;CD8A;UBD;BRCA1
Sapovirus C12 ORF1 protein	5/40	0.000985019	0.0212	0	0	6.47668	44.8371	ITGA4;STAT1;CD8A;BRCA1;TK1
Bundibugyo ebolavirus spike glycoprotein (gene: GP)	9/131	0.00101151	0.0217005	0	0	3.5597	24.5488	ITGA4;CD8A;STAT1;PRC1;UBD;ISG15;THY1;BRCA1;IFIT1
Human adenovirus 63 CR1 beta protein (gene: E3)	9/131	0.00101151	0.0216314	0	0	3.5597	24.5488	ITGA4;CD8A;STAT1;UBD;CRTAM;SLAMF6;BRCA1;ECT2;ICOS
Human papillomavirus type 52 early protein (gene: E7)	6/60	0.00103358	0.0220333	0	0	5.18135	35.6203	CCNB1;ITGA4;CD8A;STAT1;UBD;BRCA1
Cercopithecine betaherpesvirus 5 membrane protein US20 (gene: US20)	3/11	0.00104888	0.0222886	0	0	14.1309	96.9388	STAT1;UBD;BRCA1
Coxsackievirus A11 3c	3/11	0.00104888	0.0222183	0	0	14.1309	96.9388	CD8A;STAT1;BRCA1
Coxsackievirus A13 3c	3/11	0.00104888	0.0221485	0	0	14.1309	96.9388	CD8A;STAT1;BRCA1
Coxsackievirus A17 3C	3/11	0.00104888	0.022079	0	0	14.1309	96.9388	CD8A;STAT1;BRCA1
Coxsackievirus A18 3C protein	3/11	0.00104888	0.02201	0	0	14.1309	96.9388	CD8A;STAT1;BRCA1
Coxsackievirus A6 2A protein	3/11	0.00104888	0.0219415	0	0	14.1309	96.9388	CD8A;STAT1;BRCA1
Horsepox virus HSPV095 (Thymidine kinase)	3/11	0.00104888	0.0218733	0	0	14.1309	96.9388	STAT1;BRCA1;TK1
Horsepox virus HSPV015a	3/11	0.00104888	0.0218056	0	0	14.1309	96.9388	CD8A;STAT1;UBD
Human adenovirus D8 protease (gene: L3)	3/11	0.00104888	0.0217383	0	0	14.1309	96.9388	STAT1;UBD;BRCA1
Human coronavirus HKU1 nsp9 (gene: orf1ab)	3/11	0.00104888	0.0216714	0	0	14.1309	96.9388	CD8A;STAT1;UBD
Human enterovirus C102 3c	3/11	0.00104888	0.0216049	0	0	14.1309	96.9388	CD8A;STAT1;BRCA1
Human papillomavirus type 156 early protein E6 (gene: E6)	3/11	0.00104888	0.0215389	0	0	14.1309	96.9388	CD8A;STAT1;BRCA1
Human papillomavirus type 59 ORF putative E6	3/11	0.00104888	0.0214732	0	0	14.1309	96.9388	CD8A;STAT1;UBD
Human poliovirus 3 PROT	3/11	0.00104888	0.0214079	0	0	14.1309	96.9388	CD8A;STAT1;BRCA1
Human rhinovirus A10 2C	3/11	0.00104888	0.0213431	0	0	14.1309	96.9388	STAT1;BRCA1;TK1
Human rhinovirus A100 2C	3/11	0.00104888	0.0212786	0	0	14.1309	96.9388	STAT1;BRCA1;TK1
Human rhinovirus A66 2C	3/11	0.00104888	0.0212145	0	0	14.1309	96.9388	STAT1;BRCA1;TK1
SARS coronavirus 2-O-ribose methyltransferase (2-o-MT) (gene: orf1ab)	3/11	0.00104888	0.0211508	0	0	14.1309	96.9388	STAT1;ISG15;BRCA1
Salivirus NG-J1 VP0	3/11	0.00104888	0.0210874	0	0	14.1309	96.9388	CD8A;STAT1;BRCA1
Vaccinia virus thymidine kinase (gene: J2R)	3/11	0.00104888	0.0210245	0	0	14.1309	96.9388	STAT1;BRCA1;TK1
Vaccinia virus Ankara thymidine kinase	3/11	0.00104888	0.0209619	0	0	14.1309	96.9388	STAT1;BRCA1;TK1
Vaccinia virus Ankara ribonucleotide reductase small subunit	3/11	0.00104888	0.0208997	0	0	14.1309	96.9388	RRM2;STAT1;BRCA1
Yaba-like disease virus 56R protein (gene: 56R)	3/11	0.00104888	0.0208379	0	0	14.1309	96.9388	CD8A;STAT1;BRCA1
Human betaherpesvirus 6 U94, Rep (gene: U94)	4/24	0.00106898	0.0211746	0	0	8.63558	59.0765	STAT1;CD8A;UBD;BRCA1
Human betaherpesvirus 6A protein U94/rep (gene: U94)	4/24	0.00106898	0.0211123	0	0	8.63558	59.0765	STAT1;CD8A;UBD;BRCA1
Human papillomavirus 140 replication protein (gene: E1)	4/24	0.00106898	0.0210504	0	0	8.63558	59.0765	STAT1;CD8A;BRCA1;TK1
Human papillomavirus 172 E7	4/24	0.00106898	0.0209888	0	0	8.63558	59.0765	ITGA4;STAT1;UBD;BRCA1
Human papillomavirus type 27b E1 protein (gene: E1)	4/24	0.00106898	0.0209276	0	0	8.63558	59.0765	STAT1;CD8A;BRCA1;TK1
Human papillomavirus type 6 E7 (gene: E7)	4/24	0.00106898	0.0208668	0	0	8.63558	59.0765	ITGA4;STAT1;UBD;BRCA1
Human parechovirus 8 2C	4/24	0.00106898	0.0208063	0	0	8.63558	59.0765	ITGA4;STAT1;BRCA1;TK1
Human rhinovirus A65 2C	4/24	0.00106898	0.0207462	0	0	8.63558	59.0765	STAT1;UBD;BRCA1;TK1
Human rhinovirus A76 2C	4/24	0.00106898	0.0206864	0	0	8.63558	59.0765	STAT1;FIGNL1;BRCA1;TK1
Human rhinovirus B26 2C	4/24	0.00106898	0.020627	0	0	8.63558	59.0765	STAT1;UBD;BRCA1;TK1
Vesicular stomatitis Indiana virus polymerase (L protein)	4/24	0.00106898	0.0205679	0	0	8.63558	59.0765	ITGA4;STAT1;CD8A;BRCA1
Mumps virus genotype G phosphoprotein (gene: P)	13/247	0.00107895	0.0207003	0	0	2.72702	18.6304	ITK;ITGA4;STAT1;BRCA1;FYB;HIST2H2AC;PSTPIP1;CD8A;LCK;UBD;PDCD1;ICOS;HIST1H2AB
Hepatitis C virus subtype 1b NS3 protease/helicase	5/41	0.00110429	0.0211263	0	0	6.31872	43.0213	ITGA4;STAT1;CD8A;BRCA1;TK1
Human adenovirus 56 IVa2 protein (gene: IVa2)	5/41	0.00110429	0.0210663	0	0	6.31872	43.0213	STAT1;UBD;TAP1;BRCA1;TK1
Human papillomavirus 113 E7 protein (gene: E7)	5/41	0.00110429	0.0210066	0	0	6.31872	43.0213	CCNB1;ITGA4;STAT1;UBD;BRCA1
Human papillomavirus type 115 early protein E7 (gene: E7)	5/41	0.00110429	0.0209472	0	0	6.31872	43.0213	ITGA4;STAT1;CD8A;UBD;BRCA1
Human papillomavirus type 68a E7 protein	5/41	0.00110429	0.0208882	0	0	6.31872	43.0213	CCNB1;ITGA4;STAT1;UBD;BRCA1
Norovirus Hu/GII.4/Jannali/NSW774M/2011/AU VP1	5/41	0.00110429	0.0208296	0	0	6.31872	43.0213	ITGA4;STAT1;CD8A;UBD;BRCA1
Norovirus Hu/GII.4/Ohio/7G/2012/USA major capsid protein	5/41	0.00110429	0.0207712	0	0	6.31872	43.0213	ITGA4;STAT1;CD8A;UBD;BRCA1
Norovirus Hu/GII.4/Seoul/1071/2010/KOR major capsid protein	5/41	0.00110429	0.0207132	0	0	6.31872	43.0213	ITGA4;STAT1;CD8A;UBD;BRCA1
Norovirus Hu/GII/Seoul1055/KOR/2010 major capsid protein	5/41	0.00110429	0.0206555	0	0	6.31872	43.0213	ITGA4;STAT1;CD8A;UBD;BRCA1
Vaccinia virus Ankara putative ATPase.	5/41	0.00110429	0.0205981	0	0	6.31872	43.0213	STAT1;FIGNL1;BRCA1;TK1;TRIP13
Human adenovirus 16 maturation protein IVA2 (gene: IVa2)	6/61	0.001128	0.020982	0	0	5.09641	34.5909	STAT1;UBD;TAP1;ISG15;BRCA1;TK1
Human adenovirus 6 maturation protein pIVa2 (gene: pIVa2)	6/61	0.001128	0.0209241	0	0	5.09641	34.5909	ITGA4;STAT1;UBD;TAP1;BRCA1;TK1
Influenza A virus (A/California/04/2009(H1N1)) HA2 (gene: HA)	11/189	0.00115243	0.0213184	0	0	3.0156	20.4032	GBP6;CD8A;STAT1;UBD;THY1;BRCA1;PDCD1;ICOS;GBP2;GBP4;GBP3
Influenza A virus (A/California/07/2009(H1N1)) HA2 (gene: HA)	11/189	0.00115243	0.0212599	0	0	3.0156	20.4032	GBP6;CD8A;STAT1;UBD;THY1;BRCA1;PDCD1;ICOS;GBP2;GBP4;GBP3
Human mastadenovirus A E3 CR1-beta1	16/345	0.00116617	0.0214542	0	0	2.40294	16.2296	CD274;ITGA4;STAT1;CRTAM;ISG15;THY1;BRCA1;LILRB4;CD8A;UBD;SLAMF8;SLAMF7;CD226;SLAMF6;PDCD1;ICOS
Ectromelia virus ERPV EEV c-type lectin-like protein	9/134	0.00118689	0.0217758	0	0	3.48001	23.4428	CXCL9;KLRK1;CCL8;CD72;KLRC3;STAT1;KLRC1;CLEC4E;CXCL5
Human adenovirus 11+34 encapsidation protein IVa2 (gene: IVa2)	6/62	0.00122888	0.0224849	0	0	5.01421	33.6035	STAT1;UBD;TAP1;ISG15;BRCA1;TK1
Human betaherpesvirus 5 envelope glycoprotein UL4 (gene: UL4)	10/162	0.00122949	0.0224349	0	0	3.19836	21.4327	ITGA4;CD8A;STAT1;UBD;CRTAM;CD28;SLAMF7;CD226;ICOS;IL18BP
Coxsackievirus A18 VP1 protein	5/42	0.00123394	0.022455	0	0	6.16827	41.3123	ITGA4;STAT1;CD8A;UBD;BRCA1
Human adenovirus D10 pIVa2 (gene: pIVa2)	5/42	0.00123394	0.0223943	0	0	6.16827	41.3123	STAT1;UBD;TAP1;BRCA1;TK1
Human mastadenovirus D encapsidation protein IVa2 (gene: IVa2)	5/42	0.00123394	0.0223339	0	0	6.16827	41.3123	STAT1;UBD;TAP1;BRCA1;TK1
Middle East respiratory syndrome-related coronavirus nsp3 protein (gene: orf1ab)	5/42	0.00123394	0.0222739	0	0	6.16827	41.3123	ITGA4;STAT1;UBD;ISG15;BRCA1
Norovirus Hu/GII-4/CGMH01/2006/TW major viral capsid protein (gene: VP1)	5/42	0.00123394	0.0222142	0	0	6.16827	41.3123	ITGA4;STAT1;CD8A;UBD;BRCA1
Norovirus Hu/GII.4/JB-15/KOR/2008 capsid protein	5/42	0.00123394	0.0221548	0	0	6.16827	41.3123	ITGA4;STAT1;CD8A;UBD;BRCA1
Human astrovirus BF34 ORF1ab	4/25	0.00125339	0.022444	0	0	8.29016	55.394	ITGA4;STAT1;CD8A;BRCA1
Human papillomavirus FA75/KI88-03 E1 protein (gene: E1)	4/25	0.00125339	0.0223843	0	0	8.29016	55.394	STAT1;CD8A;BRCA1;TK1
Human papillomavirus type 43 E1 protein (gene: E1)	4/25	0.00125339	0.0223249	0	0	8.29016	55.394	ITGA4;STAT1;BRCA1;TK1
Human papillomavirus type 72b E1 protein (gene: E1)	4/25	0.00125339	0.0222659	0	0	8.29016	55.394	STAT1;CD8A;BRCA1;TK1
Human papillomavirus type 92 E7	4/25	0.00125339	0.0222071	0	0	8.29016	55.394	ITGA4;STAT1;UBD;BRCA1
Human parechovirus 1 VP0	4/25	0.00125339	0.0221487	0	0	8.29016	55.394	ITGA4;STAT1;CD8A;BRCA1
Human rhinovirus A18 1B	4/25	0.00125339	0.0220905	0	0	8.29016	55.394	ITGA4;STAT1;CD8A;BRCA1
Human rhinovirus A46 2C (P2-C)	4/25	0.00125339	0.0220327	0	0	8.29016	55.394	STAT1;UBD;BRCA1;TK1
Human rhinovirus B84 2C	4/25	0.00125339	0.0219752	0	0	8.29016	55.394	RAD51;STAT1;BRCA1;TK1
Macacine alphaherpesvirus 1 envelope glycoprotein G (gene: US4)	4/25	0.00125339	0.021918	0	0	8.29016	55.394	ITGA4;STAT1;CD8A;CD226
Measles virus genotype G3 hemagglutinin protein (gene: H)	4/25	0.00125339	0.021861	0	0	8.29016	55.394	CD96;SLAMF8;CD48;BRCA1
Middle East respiratory syndrome-related coronavirus nsp13 protein (gene: orf1ab)	4/25	0.00125339	0.0218044	0	0	8.29016	55.394	STAT1;ISG15;BRCA1;TK1
Molluscum contagiosum virus subtype 1 MC140L (gene: MC140L)	4/25	0.00125339	0.0217481	0	0	8.29016	55.394	ITGA4;STAT1;TAP1;TK1
Norovirus Hu/Norwalk/20067/2009/VNM NTPase (gene: POL)	4/25	0.00125339	0.021692	0	0	8.29016	55.394	STAT1;FIGNL1;BRCA1;TK1
Tula virus Glycoproteins G1 and G2 precursor	4/25	0.00125339	0.0216362	0	0	8.29016	55.394	ITGA4;STAT1;CD8A;BRCA1
Alkhumra hemorrhagic fever virus non-structural protein NS3	6/63	0.00133653	0.0230123	0	0	4.93462	32.6557	ITGA4;CD8A;STAT1;UBD;BRCA1;TK1
Human mastadenovirus A IVa2	6/63	0.00133653	0.0229534	0	0	4.93462	32.6557	CD8A;STAT1;UBD;TAP1;BRCA1;TK1
Human alphaherpesvirus 1 envelope glycoprotein C (gene: UL44)	10/164	0.00134856	0.023101	0	0	3.15936	20.8793	ITGA4;CD8A;STAT1;UBD;CRTAM;SLAMF6;BRCA1;MEFV;ICOS;IL18BP
Human adenovirus 36 IVa2	5/43	0.00137449	0.0234853	0	0	6.02482	39.7016	STAT1;UBD;TAP1;BRCA1;TK1
Human adenovirus 58 IVa2 (gene: pIVa2)	5/43	0.00137449	0.0234257	0	0	6.02482	39.7016	STAT1;UBD;TAP1;BRCA1;TK1
Human alphaherpesvirus 3 tegument host shutoff protein (gene: ORF17)	5/43	0.00137449	0.0233664	0	0	6.02482	39.7016	STAT1;UBD;BRCA1;HIST2H2AC;HIST1H2AB
Human herpesvirus 3 strain Dumas host shut-off factor	5/43	0.00137449	0.0233074	0	0	6.02482	39.7016	STAT1;UBD;BRCA1;HIST2H2AC;HIST1H2AB
Norovirus Hu/GII.4/NIHIC1.13/2012/USA capsid protein VP1 (gene: VP1)	5/43	0.00137449	0.0232487	0	0	6.02482	39.7016	ITGA4;STAT1;CD8A;UBD;BRCA1
Norovirus Hu/GII.4/NIHIC1.16/2012/USA capsid protein VP1 (gene: VP1)	5/43	0.00137449	0.0231903	0	0	6.02482	39.7016	ITGA4;STAT1;CD8A;UBD;BRCA1
Norovirus Hu/GII/Seoul1072/KOR/2010 major capsid protein	5/43	0.00137449	0.0231322	0	0	6.02482	39.7016	ITGA4;STAT1;CD8A;UBD;BRCA1
Cowpox virus CPXV105 protein (gene: CPXV105 CDS)	3/12	0.00137857	0.0231427	0	0	12.9534	85.3201	STAT1;BRCA1;TK1
Ectromelia virus ERPV ribonucleotide reductase small subunit	3/12	0.00137857	0.023085	0	0	12.9534	85.3201	RRM2;STAT1;BRCA1
Horsepox virus HSPV044 (Ferritin-like superfamily of diiron-containing four-helix-bundle proteins)	3/12	0.00137857	0.0230276	0	0	12.9534	85.3201	RRM2;STAT1;BRCA1
Human alphaherpesvirus 3 nuclear egress membrane protein (gene: ORF24)	3/12	0.00137857	0.0229704	0	0	12.9534	85.3201	CD8A;STAT1;BRCA1
Human herpesvirus 3 strain Dumas nuclear membrane-associated phosphoprotein	3/12	0.00137857	0.0229136	0	0	12.9534	85.3201	CD8A;STAT1;BRCA1
Human parechovirus 4 VP1	3/12	0.00137857	0.022857	0	0	12.9534	85.3201	ITGA4;STAT1;BRCA1
Human rhinovirus A40 2C	3/12	0.00137857	0.0228007	0	0	12.9534	85.3201	STAT1;BRCA1;TK1
Monkeypox virus thymidine kinase	3/12	0.00137857	0.0227447	0	0	12.9534	85.3201	STAT1;BRCA1;TK1
Monkeypox virus Zaire-96-I-16 L2R (gene: L2R)	3/12	0.00137857	0.0226889	0	0	12.9534	85.3201	STAT1;BRCA1;TK1
Norovirus Hu/GII/BG1C0004/2010/BGD NTPase (gene: POL)	3/12	0.00137857	0.0226334	0	0	12.9534	85.3201	STAT1;BRCA1;TK1
Norovirus Hu/Norwalk/20094/2009/VNM NTPase (gene: POL)	3/12	0.00137857	0.0225782	0	0	12.9534	85.3201	STAT1;BRCA1;TK1
Vaccinia virus TNF-alpha-receptor-like protein	3/12	0.00137857	0.0225233	0	0	12.9534	85.3201	CD8A;STAT1;BRCA1
Yaba monkey tumor virus 56R	3/12	0.00137857	0.0224686	0	0	12.9534	85.3201	CD8A;STAT1;BRCA1
Yaba monkey tumor virus 20L	3/12	0.00137857	0.0224142	0	0	12.9534	85.3201	RRM2;STAT1;BRCA1
Human adenovirus 14 IVa2 protein (gene: IVa2)	6/64	0.00145122	0.0235386	0	0	4.85751	31.7455	STAT1;UBD;TAP1;ISG15;BRCA1;TK1
Human adenovirus 55 pIVa2 50.9 kDa protein	6/64	0.00145122	0.0234819	0	0	4.85751	31.7455	STAT1;UBD;TAP1;ISG15;BRCA1;TK1
Human adenovirus 66 maturation protein IVA2 (gene: IVa2)	6/64	0.00145122	0.0234254	0	0	4.85751	31.7455	STAT1;UBD;TAP1;ISG15;BRCA1;TK1
Human gammaherpesvirus 8 vIRF-4 (gene: vIRF-4)	6/64	0.00145122	0.0233692	0	0	4.85751	31.7455	CCNB1;ITGA4;STAT1;UBD;IRF7;BRCA1
Alphapapillomavirus 4 E1 (gene: E1)	4/26	0.00145894	0.0234372	0	0	7.9713	52.053	STAT1;CD8A;BRCA1;TK1
Hantaan virus hypothetical protein	4/26	0.00145894	0.0233813	0	0	7.9713	52.053	ITGA4;STAT1;CD8A;BRCA1
Human papillomavirus 104 E1 protein (gene: E1)	4/26	0.00145894	0.0233256	0	0	7.9713	52.053	STAT1;CD8A;BRCA1;TK1
Human papillomavirus 127 E1	4/26	0.00145894	0.0232702	0	0	7.9713	52.053	ITGA4;STAT1;BRCA1;TK1
Human papillomavirus 132 E1 (gene: E1)	4/26	0.00145894	0.0232151	0	0	7.9713	52.053	STAT1;CD8A;BRCA1;TK1
Human papillomavirus 135 transforming protein (gene: E7)	4/26	0.00145894	0.0231602	0	0	7.9713	52.053	ITGA4;STAT1;UBD;BRCA1
Human papillomavirus 65 replication protein (gene: E1)	4/26	0.00145894	0.0231056	0	0	7.9713	52.053	STAT1;BRCA1;TK1;ECT2
Human papillomavirus type 2 E1 protein (gene: E1)	4/26	0.00145894	0.0230512	0	0	7.9713	52.053	STAT1;CD8A;BRCA1;TK1
Human papillomavirus type 39 E7 (gene: E7)	4/26	0.00145894	0.0229971	0	0	7.9713	52.053	CCNB1;ITGA4;UBD;BRCA1
Human parvovirus 4 VP1	4/26	0.00145894	0.0229432	0	0	7.9713	52.053	ITGA4;STAT1;CD8A;BRCA1
Human rhinovirus A21 2C	4/26	0.00145894	0.0228896	0	0	7.9713	52.053	STAT1;UBD;BRCA1;TK1
Human rhinovirus A34 2C	4/26	0.00145894	0.0228363	0	0	7.9713	52.053	STAT1;FIGNL1;BRCA1;TK1
Human rhinovirus A71 2C	4/26	0.00145894	0.0227832	0	0	7.9713	52.053	STAT1;FIGNL1;BRCA1;TK1
Sin Nombre virus glycoprotein precursor (gene: GPC)	4/26	0.00145894	0.0227303	0	0	7.9713	52.053	ITGA4;STAT1;CD8A;BRCA1
Echovirus E11 2C	5/44	0.00152651	0.023728	0	0	5.88789	38.1817	STAT1;FIGNL1;UBD;BRCA1;TK1
Human adenovirus 36 E3 50K (CR1b)	5/44	0.00152651	0.0236732	0	0	5.88789	38.1817	ITGA4;STAT1;CD8A;BRCA1;ECT2
Human betaherpesvirus 5 envelope glycoprotein UL33 (gene: UL33)	5/44	0.00152651	0.0236187	0	0	5.88789	38.1817	STAT1;CD8A;UBD;BRCA1;CCR5
Monkeypox virus Zaire-96-I-16 E8L (gene: E8L)	5/44	0.00152651	0.0235644	0	0	5.88789	38.1817	CD96;CD8A;THY1;PDCD1;ICOS
Norovirus Hu/GII/BG1C0004/2010/BGD capsid protein VP1 (gene: VP1)	5/44	0.00152651	0.0235103	0	0	5.88789	38.1817	ITGA4;STAT1;CD8A;UBD;BRCA1
Norovirus Hu/Norwalk/10235/2009/VNM capsid protein VP1 (gene: VP1)	5/44	0.00152651	0.0234565	0	0	5.88789	38.1817	ITGA4;STAT1;CD8A;UBD;BRCA1
Ectromelia virus ERPV interferon gamma receptor	6/65	0.00157327	0.0241199	0	0	4.78278	30.8709	ITGA4;IFNG;CD8A;STAT1;UBD;BRCA1
Ectromelia virus ERPV interferon resistance and PKR inhibitor	6/65	0.00157327	0.0240649	0	0	4.78278	30.8709	CD8A;STAT1;UBD;BRCA1;HIST2H2AC;HIST1H2AB
Human adenovirus E4 protein IVa2	6/65	0.00157327	0.0240102	0	0	4.78278	30.8709	STAT1;UBD;TAP1;ISG15;BRCA1;TK1
Human mastadenovirus E encapsidation protein IVa2 (gene: IVa2)	6/65	0.00157327	0.0239558	0	0	4.78278	30.8709	STAT1;UBD;TAP1;ISG15;BRCA1;TK1
Vaccinia virus Ankara double-stranded RNA binding protein	6/65	0.00157327	0.0239016	0	0	4.78278	30.8709	CD8A;STAT1;UBD;BRCA1;HIST2H2AC;HIST1H2AB
Mumps virus strain Jeryl Lynn phosphoprotein (gene: P)	8/113	0.0015749	0.0238723	0	0	3.66821	23.673	ITGA4;STAT1;UBD;BRCA1;PDCD1;ICOS;HIST1H2AB;HIST2H2AC
Cowpox virus CPXV167 protein (gene: CPXV167 CDS)	4/27	0.00168686	0.0255118	0	0	7.67607	49.0109	STAT1;TAP1;BRCA1;TK1
Coxsackievirus A13 2c	4/27	0.00168686	0.0254545	0	0	7.67607	49.0109	STAT1;FIGNL1;BRCA1;TK1
Echovirus E3 2C	4/27	0.00168686	0.0253974	0	0	7.67607	49.0109	STAT1;UBD;BRCA1;TK1
Human papillomavirus 121 transforming protein E7 (gene: E7)	4/27	0.00168686	0.0253406	0	0	7.67607	49.0109	ITGA4;STAT1;UBD;BRCA1
Human papillomavirus 133 E7 (gene: E7)	4/27	0.00168686	0.025284	0	0	7.67607	49.0109	ITGA4;STAT1;UBD;BRCA1
Human papillomavirus 98 E7 protein (gene: E7)	4/27	0.00168686	0.0252277	0	0	7.67607	49.0109	ITGA4;STAT1;UBD;BRCA1
Human papillomavirus type 112 E1 protein (gene: E1)	4/27	0.00168686	0.0251716	0	0	7.67607	49.0109	STAT1;CD8A;BRCA1;TK1
Influenza A virus (A/New York/392/2004(H3N2)) polymerase PB2 (gene: PB2)	4/27	0.00168686	0.0251158	0	0	7.67607	49.0109	ITGA4;STAT1;CD8A;BRCA1
Influenza A virus (A/New York/602/1996(H3N2)) polymerase PB2 (gene: PB2)	4/27	0.00168686	0.0250603	0	0	7.67607	49.0109	ITGA4;STAT1;CD8A;BRCA1
Lassa mammarenavirus Z protein	4/27	0.00168686	0.0250049	0	0	7.67607	49.0109	STAT1;LPXN;BRCA1;TK1
Norovirus GII/Hu/JP/2007/GII.P21_GII.21/Kawasaki/YO284 VP1 (gene: VP1)	4/27	0.00168686	0.0249499	0	0	7.67607	49.0109	ITGA4;STAT1;CD8A;BRCA1
Norovirus Hu/GII.4/NIHIC17.5/2012/USA NTPase (gene: POL)	4/27	0.00168686	0.024895	0	0	7.67607	49.0109	STAT1;FIGNL1;BRCA1;TK1
Norovirus Hu/GII.4/NIHIC17.6/2012/USA NTPase (gene: POL)	4/27	0.00168686	0.0248404	0	0	7.67607	49.0109	STAT1;FIGNL1;BRCA1;TK1
Norovirus Hu/GII.4/NIHIC17.8/2013/USA NTPase (gene: POL)	4/27	0.00168686	0.0247861	0	0	7.67607	49.0109	STAT1;FIGNL1;BRCA1;TK1
Pichinde mammarenavirus Z protein (gene: Z)	4/27	0.00168686	0.024732	0	0	7.67607	49.0109	STAT1;CD8A;BRCA1;TK1
Coxsackievirus A12 VP1 protein	5/45	0.00169053	0.0247319	0	0	5.75705	36.7456	ITGA4;STAT1;CD8A;UBD;BRCA1
Human adenovirus 54 pIVa2	5/45	0.00169053	0.0246781	0	0	5.75705	36.7456	STAT1;UBD;TAP1;BRCA1;TK1
Human papillomavirus 122 transforming protein E7 (gene: E7)	5/45	0.00169053	0.0246246	0	0	5.75705	36.7456	CCNB1;STAT1;CD8A;UBD;BRCA1
Monkeypox virus IMV membrane protein	5/45	0.00169053	0.0245713	0	0	5.75705	36.7456	CD96;CD8A;THY1;PDCD1;ICOS
Norovirus Hu/GII/10037/2009/VNM capsid protein VP1 (gene: VP1)	5/45	0.00169053	0.0245182	0	0	5.75705	36.7456	ITGA4;STAT1;CD8A;UBD;BRCA1
Norovirus Hu/GII/BG1C0066/2011/BGD capsid protein VP1 (gene: VP1)	5/45	0.00169053	0.0244653	0	0	5.75705	36.7456	ITGA4;STAT1;CD8A;UBD;BRCA1
Norovirus Hu/GII/BG1C0282/2011/BGD capsid protein VP1 (gene: VP1)	5/45	0.00169053	0.0244127	0	0	5.75705	36.7456	ITGA4;STAT1;CD8A;UBD;BRCA1
Norovirus Hu/Norwalk/10199/2009/VNM capsid protein VP1 (gene: VP1)	5/45	0.00169053	0.0243603	0	0	5.75705	36.7456	ITGA4;STAT1;CD8A;UBD;BRCA1
Norovirus Hu/Norwalk/20008/2009/VNM capsid protein VP1 (gene: VP1)	5/45	0.00169053	0.0243082	0	0	5.75705	36.7456	ITGA4;STAT1;CD8A;UBD;BRCA1
Norovirus Hu/Norwalk/20066/2009/VNM capsid protein VP1 (gene: VP1)	5/45	0.00169053	0.0242562	0	0	5.75705	36.7456	ITGA4;STAT1;CD8A;UBD;BRCA1
Yaba-like disease virus 18L protein (gene: 18L)	5/45	0.00169053	0.0242045	0	0	5.75705	36.7456	PYCARD;STAT1;UBD;PYHIN1;BRCA1
Yaba-like disease virus 2L protein (gene: 2L)	5/45	0.00169053	0.024153	0	0	5.75705	36.7456	ITGA4;STAT1;CD8A;BRCA1;TNF
Titi monkey adenovirus ECC-2011 IVa2	6/66	0.00170296	0.024279	0	0	4.71032	30.0301	ITGA4;STAT1;UBD;TAP1;BRCA1;TK1
Human adenovirus 54 44.5 kDa protein	8/115	0.00176103	0.0250536	0	0	3.60442	22.8587	ITGA4;CD8A;STAT1;UBD;CRTAM;BRCA1;ECT2;ICOS
Human cyclovirus VS5700009 capsid protein	3/13	0.00176662	0.02508	0	0	11.957	75.7914	STAT1;UBD;BRCA1
Human papillomavirus 148 E6 (gene: E6)	3/13	0.00176662	0.0250271	0	0	11.957	75.7914	ITGA4;STAT1;BRCA1
Human papillomavirus 155 E6	3/13	0.00176662	0.0249744	0	0	11.957	75.7914	STAT1;BRCA1;ECT2
Human papillomavirus type 84 putative replication protein E1 (gene: E1)	3/13	0.00176662	0.0249219	0	0	11.957	75.7914	STAT1;BRCA1;TK1
Human rhinovirus A47 2C	3/13	0.00176662	0.0248697	0	0	11.957	75.7914	STAT1;BRCA1;TK1
Norovirus Hu/GII.4/HS66/2001/USA NTPase (gene: POL)	3/13	0.00176662	0.0248176	0	0	11.957	75.7914	STAT1;BRCA1;TK1
Norovirus Hu/Norwalk/10110/2009/VNM NTPase (gene: POL)	3/13	0.00176662	0.0247658	0	0	11.957	75.7914	STAT1;BRCA1;TK1
Norovirus Hu/Norwalk/10148/2009/VNM NTPase (gene: POL)	3/13	0.00176662	0.0247142	0	0	11.957	75.7914	STAT1;BRCA1;TK1
Norovirus Hu/Norwalk/10255/2009/VNM NTPase (gene: POL)	3/13	0.00176662	0.0246628	0	0	11.957	75.7914	STAT1;BRCA1;TK1
Norovirus Hu/Norwalk/20016/2009/VNM NTPase (gene: POL)	3/13	0.00176662	0.0246117	0	0	11.957	75.7914	STAT1;BRCA1;TK1
Norovirus Hu/Norwalk/20033/2009/VNM NTPase (gene: POL)	3/13	0.00176662	0.0245607	0	0	11.957	75.7914	STAT1;BRCA1;TK1
Norovirus Hu/Norwalk/20035/2009/VNM NTPase (gene: POL)	3/13	0.00176662	0.02451	0	0	11.957	75.7914	STAT1;BRCA1;TK1
Norovirus Hu/Norwalk/20066/2009/VNM NTPase (gene: POL)	3/13	0.00176662	0.0244594	0	0	11.957	75.7914	STAT1;BRCA1;TK1
Norovirus Hu/Norwalk/20118/2009/VNM NTPase (gene: POL)	3/13	0.00176662	0.0244091	0	0	11.957	75.7914	STAT1;BRCA1;TK1
Norovirus Hu/Norwalk/20140/2009/VNM NTPase (gene: POL)	3/13	0.00176662	0.024359	0	0	11.957	75.7914	STAT1;BRCA1;TK1
Respiratory syncytial virus Polymerase (L) (gene: L)	3/13	0.00176662	0.0243091	0	0	11.957	75.7914	ITGA4;STAT1;BRCA1
SARS coronavirus nsp9-pp1a/pp1ab (gene: orf1ab)	3/13	0.00176662	0.0242594	0	0	11.957	75.7914	STAT1;CD8A;ISG15
Salivirus NG-J1 VP3	3/13	0.00176662	0.0242098	0	0	11.957	75.7914	STAT1;CD8A;BRCA1
Sudan ebolavirus polymerase complex protein (gene: VP35)	3/13	0.00176662	0.0241605	0	0	11.957	75.7914	ITGA4;STAT1;BRCA1
Sudan ebolavirus - Nakisamata VP35 (gene: VP35)	3/13	0.00176662	0.0241114	0	0	11.957	75.7914	ITGA4;STAT1;BRCA1
Vaccinia virus hypothetical protein (gene: G6R)	3/13	0.00176662	0.0240625	0	0	11.957	75.7914	STAT1;CD8A;BRCA1
Vaccinia virus Ankara CD47-like protein	6/67	0.00184061	0.0250197	0	0	4.64001	29.2212	ITGA4;CD8A;STAT1;UBD;CRTAM;BRCA1
Tai Forest ebolavirus spike glycoprotein (gene: GP)	9/143	0.00186498	0.0252997	0	0	3.26099	20.4937	CD8A;STAT1;PRC1;UBD;TAP1;ISG15;THY1;BRCA1;IFIT1
Aichi virus 1 3D	5/46	0.00186712	0.0252776	0	0	5.6319	35.3872	STAT1;CD8A;UBD;ISG15;BRCA1
Coxsackievirus A6 VP1 protein	5/46	0.00186712	0.0252268	0	0	5.6319	35.3872	ITGA4;STAT1;CD8A;UBD;BRCA1
Human adenovirus 43 encapsidation protein IVa2 (gene: IVa2)	5/46	0.00186712	0.0251761	0	0	5.6319	35.3872	STAT1;UBD;TAP1;BRCA1;TK1
Human adenovirus 67 pIVa2	5/46	0.00186712	0.0251257	0	0	5.6319	35.3872	STAT1;UBD;TAP1;BRCA1;TK1
Human rhinovirus A20 2C	5/46	0.00186712	0.0250754	0	0	5.6319	35.3872	STAT1;FIGNL1;UBD;BRCA1;TK1
Melaka orthoreovirus sigma C	5/46	0.00186712	0.0250254	0	0	5.6319	35.3872	ITGA4;STAT1;UBD;PBK;CDK1
Norovirus Hu/GII-4/CGMH20/2009/TW major viral capsid protein (gene: VP1)	5/46	0.00186712	0.0249755	0	0	5.6319	35.3872	ITGA4;STAT1;CD8A;UBD;BRCA1
Norovirus Hu/GII/20477/2010/VNM capsid protein VP1 (gene: VP1)	5/46	0.00186712	0.0249259	0	0	5.6319	35.3872	ITGA4;STAT1;CD8A;UBD;BRCA1
Norovirus Hu/Norwalk/10176/2009/VNM capsid protein VP1 (gene: VP1)	5/46	0.00186712	0.0248764	0	0	5.6319	35.3872	ITGA4;STAT1;CD8A;UBD;BRCA1
Vaccinia virus IMV membrane protein (gene: D8L)	5/46	0.00186712	0.0248271	0	0	5.6319	35.3872	CD96;CD8A;THY1;PDCD1;ICOS
Encephalomyocarditis virus protein 2C	4/28	0.00193836	0.0257235	0	0	7.40192	46.2318	ITGA4;STAT1;BRCA1;TK1
Human adenovirus 63 18.4K protein (gene: E3)	4/28	0.00193836	0.0256727	0	0	7.40192	46.2318	ITGA4;STAT1;CD8A;BRCA1
Human papillomavirus 116 E1 protein	4/28	0.00193836	0.0256222	0	0	7.40192	46.2318	STAT1;CD8A;BRCA1;TK1
Human papillomavirus 151 putative E7 product (gene: E7)	4/28	0.00193836	0.0255719	0	0	7.40192	46.2318	ITGA4;STAT1;UBD;BRCA1
Human papillomavirus type 129 E2 (gene: E2)	4/28	0.00193836	0.0255217	0	0	7.40192	46.2318	ITGA4;STAT1;CD8A;BRCA1
Human poliovirus 3 P2-X	4/28	0.00193836	0.0254718	0	0	7.40192	46.2318	STAT1;UBD;BRCA1;TK1
Human rhinovirus B3 1D (VP1)	4/28	0.00193836	0.025422	0	0	7.40192	46.2318	STAT1;CD8A;BRCA1;ICOS
Influenza A virus (A/New York/599/1996(H3N2)) polymerase PB2 (gene: PB2)	4/28	0.00193836	0.0253725	0	0	7.40192	46.2318	ITGA4;STAT1;CD8A;BRCA1
Monkeypox virus CD47-like putative membrane protein	4/28	0.00193836	0.0253231	0	0	7.40192	46.2318	ITGA4;STAT1;CD8A;BRCA1
Monkeypox virus Zaire-96-I-16 A40L (gene: A40L)	4/28	0.00193836	0.0252739	0	0	7.40192	46.2318	ITGA4;STAT1;CD8A;BRCA1
Saffold virus protein 2C	4/28	0.00193836	0.025225	0	0	7.40192	46.2318	ITGA4;STAT1;BRCA1;TK1
Yaba-like disease virus 84R protein (gene: 84R)	4/28	0.00193836	0.0251762	0	0	7.40192	46.2318	STAT1;UBD;BRCA1;TK1
Human adenovirus 34 maturation protein IVa2 (gene: IVa2)	6/68	0.00198653	0.025752	0	0	4.57178	28.4427	STAT1;UBD;TAP1;ISG15;BRCA1;TK1
Human adenovirus 35 IVa2	6/68	0.00198653	0.0257024	0	0	4.57178	28.4427	STAT1;UBD;TAP1;ISG15;BRCA1;TK1
West Nile virus lineage 1 excised_polyprotein 1..787 (gene: flavivirus polyprotein)	7/92	0.00202841	0.0261938	0	0	3.94233	24.4444	ITGA4;CD8A;STAT1;UBD;TAP1;BRCA1;THY1
Human adenovirus 52 IVa2 (gene: IVa2)	5/47	0.00205683	0.0265099	0	0	5.51207	34.1009	STAT1;UBD;TAP1;BRCA1;TK1
Human adenovirus 63 IVa2 protein (gene: IVa2)	5/47	0.00205683	0.0264591	0	0	5.51207	34.1009	STAT1;UBD;TAP1;BRCA1;TK1
Monkeypox virus viral core cysteine proteinase	5/47	0.00205683	0.0264085	0	0	5.51207	34.1009	STAT1;CD8A;UBD;ISG15;BRCA1
Monkeypox virus Zaire-96-I-16 I7L (gene: I7L)	5/47	0.00205683	0.0263581	0	0	5.51207	34.1009	STAT1;CD8A;UBD;ISG15;BRCA1
Norovirus Hu/Norwalk/10148/2009/VNM capsid protein VP1 (gene: VP1)	5/47	0.00205683	0.0263079	0	0	5.51207	34.1009	ITGA4;STAT1;CD8A;UBD;BRCA1
Yaba-like disease virus 48L protein (gene: 48L)	5/47	0.00205683	0.0262579	0	0	5.51207	34.1009	STAT1;CD8A;UBD;ISG15;BRCA1
Kyasanur Forest disease virus NS3	6/69	0.00214102	0.0272808	0	0	4.50552	27.693	ITGA4;CD8A;STAT1;UBD;BRCA1;TK1
Cowpox virus CPXV126 protein (gene: CPXV126 CDS)	4/29	0.00221465	0.0281655	0	0	7.14669	43.6853	STAT1;CD8A;UBD;BRCA1
Human adenovirus 22 17.6 kDa protein (gene: E3)	4/29	0.00221465	0.0281123	0	0	7.14669	43.6853	ITGA4;STAT1;CD8A;BRCA1
Human adenovirus D8 17.7kDa protein (gene: E3)	4/29	0.00221465	0.0280593	0	0	7.14669	43.6853	ITGA4;STAT1;CD8A;BRCA1
Human papillomavirus 121 replication protein E1 (gene: E1)	4/29	0.00221465	0.0280064	0	0	7.14669	43.6853	STAT1;CD8A;BRCA1;TK1
Human papillomavirus 145 transforming protein (gene: E7)	4/29	0.00221465	0.0279538	0	0	7.14669	43.6853	ITGA4;STAT1;UBD;BRCA1
Human papillomavirus type 60 replication protein E1 (gene: E1)	4/29	0.00221465	0.0279013	0	0	7.14669	43.6853	ITGA4;STAT1;BRCA1;TK1
Human papillomavirus type 68 E7 (gene: E7)	4/29	0.00221465	0.0278491	0	0	7.14669	43.6853	CCNB1;ITGA4;UBD;BRCA1
Human rhinovirus A1 1D	4/29	0.00221465	0.027797	0	0	7.14669	43.6853	ITGA4;STAT1;CD8A;BRCA1
Human rhinovirus A43 2C	4/29	0.00221465	0.0277452	0	0	7.14669	43.6853	STAT1;FIGNL1;BRCA1;TK1
Human rhinovirus A77 1D	4/29	0.00221465	0.0276935	0	0	7.14669	43.6853	ITGA4;STAT1;CD8A;BRCA1
Human rhinovirus B27 2C	4/29	0.00221465	0.027642	0	0	7.14669	43.6853	STAT1;UBD;BRCA1;TK1
Norovirus GII.17 VP1 (gene: VP1)	4/29	0.00221465	0.0275907	0	0	7.14669	43.6853	ITGA4;STAT1;CD8A;BRCA1
Papiine alphaherpesvirus 2 envelope glycoprotein G (gene: US4)	4/29	0.00221465	0.0275396	0	0	7.14669	43.6853	ITGA4;STAT1;CD8A;UBD
Vaccinia virus contains mutT-like motif of NTP-phosphohydrolase for DNA repair (gene: D9R)	4/29	0.00221465	0.0274887	0	0	7.14669	43.6853	STAT1;CD8A;UBD;BRCA1
Lyssavirus Ozernoe glycoprotein (gene: G)	3/14	0.00221643	0.02746	0	0	11.1029	67.8593	ITGA4;STAT1;BRCA1
Molluscum contagiosum virus subtype 1 MC062R (gene: MC062R)	3/14	0.00221643	0.0274095	0	0	11.1029	67.8593	STAT1;CD8A;BRCA1
Norovirus Hu/GII.4/20199/2009/VNM NTPase (gene: POL)	3/14	0.00221643	0.0273591	0	0	11.1029	67.8593	STAT1;BRCA1;TK1
Norovirus Hu/GII.4/NIHIC2.2/2010/USA NTPase (gene: POL)	3/14	0.00221643	0.0273089	0	0	11.1029	67.8593	STAT1;BRCA1;TK1
Norovirus Hu/GII.4/NIHIC2.3/2010/USA NTPase (gene: POL)	3/14	0.00221643	0.0272589	0	0	11.1029	67.8593	STAT1;BRCA1;TK1
Norovirus Hu/GII.4/NIHIC27.2/2012/USA NTPase (gene: POL)	3/14	0.00221643	0.027209	0	0	11.1029	67.8593	STAT1;BRCA1;TK1
Norovirus Hu/GII.4/NIHIC35/2013/USA NTPase (gene: POL)	3/14	0.00221643	0.0271594	0	0	11.1029	67.8593	STAT1;BRCA1;TK1
Norovirus Hu/GII/10002/2009/VNM NTPase (gene: POL)	3/14	0.00221643	0.0271099	0	0	11.1029	67.8593	STAT1;BRCA1;TK1
Norovirus Hu/GII/10003/2009/VNM NTPase (gene: POL)	3/14	0.00221643	0.0270606	0	0	11.1029	67.8593	STAT1;BRCA1;TK1
Norovirus Hu/GII/10012/2009/VNM NTPase (gene: POL)	3/14	0.00221643	0.0270115	0	0	11.1029	67.8593	STAT1;BRCA1;TK1
Norovirus Hu/GII/10037/2009/VNM NTPase (gene: POL)	3/14	0.00221643	0.0269626	0	0	11.1029	67.8593	STAT1;BRCA1;TK1
Norovirus Hu/Norwalk/10034/2009/VNM NTPase (gene: POL)	3/14	0.00221643	0.0269138	0	0	11.1029	67.8593	STAT1;BRCA1;TK1
Norovirus Hu/Norwalk/10054/2009/VNM NTPase (gene: POL)	3/14	0.00221643	0.0268652	0	0	11.1029	67.8593	STAT1;BRCA1;TK1
Norovirus Hu/Norwalk/10074/2009/VNM NTPase (gene: POL)	3/14	0.00221643	0.0268168	0	0	11.1029	67.8593	STAT1;BRCA1;TK1
Norovirus Hu/Norwalk/10075/2009/VNM NTPase (gene: POL)	3/14	0.00221643	0.0267686	0	0	11.1029	67.8593	STAT1;BRCA1;TK1
Norovirus Hu/Norwalk/10078/2009/VNM NTPase (gene: POL)	3/14	0.00221643	0.0267205	0	0	11.1029	67.8593	STAT1;BRCA1;TK1
Norovirus Hu/Norwalk/10079/2009/VNM NTPase (gene: POL)	3/14	0.00221643	0.0266726	0	0	11.1029	67.8593	STAT1;BRCA1;TK1
Norovirus Hu/Norwalk/10114/2009/VNM NTPase (gene: POL)	3/14	0.00221643	0.0266249	0	0	11.1029	67.8593	STAT1;BRCA1;TK1
Norovirus Hu/Norwalk/10116/2009/VNM NTPase (gene: POL)	3/14	0.00221643	0.0265774	0	0	11.1029	67.8593	STAT1;BRCA1;TK1
Norovirus Hu/Norwalk/10129/2009/VNM NTPase (gene: POL)	3/14	0.00221643	0.02653	0	0	11.1029	67.8593	STAT1;BRCA1;TK1
Norovirus Hu/Norwalk/10136/2009/VNM NTPase (gene: POL)	3/14	0.00221643	0.0264828	0	0	11.1029	67.8593	STAT1;BRCA1;TK1
Norovirus Hu/Norwalk/10137/2009/VNM NTPase (gene: POL)	3/14	0.00221643	0.0264358	0	0	11.1029	67.8593	STAT1;BRCA1;TK1
Norovirus Hu/Norwalk/10145/2009/VNM NTPase (gene: POL)	3/14	0.00221643	0.0263889	0	0	11.1029	67.8593	STAT1;BRCA1;TK1
Norovirus Hu/Norwalk/10158/2009/VNM NTPase (gene: POL)	3/14	0.00221643	0.0263422	0	0	11.1029	67.8593	STAT1;BRCA1;TK1
Norovirus Hu/Norwalk/10162/2009/VNM NTPase (gene: POL)	3/14	0.00221643	0.0262956	0	0	11.1029	67.8593	STAT1;BRCA1;TK1
Norovirus Hu/Norwalk/10163/2009/VNM NTPase (gene: POL)	3/14	0.00221643	0.0262493	0	0	11.1029	67.8593	STAT1;BRCA1;TK1
Norovirus Hu/Norwalk/10169/2009/VNM NTPase (gene: POL)	3/14	0.00221643	0.0262031	0	0	11.1029	67.8593	STAT1;BRCA1;TK1
Norovirus Hu/Norwalk/10176/2009/VNM NTPase (gene: POL)	3/14	0.00221643	0.026157	0	0	11.1029	67.8593	STAT1;BRCA1;TK1
Norovirus Hu/Norwalk/10177/2009/VNM NTPase (gene: POL)	3/14	0.00221643	0.0261111	0	0	11.1029	67.8593	STAT1;BRCA1;TK1
Norovirus Hu/Norwalk/10183/2009/VNM NTPase (gene: POL)	3/14	0.00221643	0.0260654	0	0	11.1029	67.8593	STAT1;BRCA1;TK1
Norovirus Hu/Norwalk/10194/2009/VNM NTPase (gene: POL)	3/14	0.00221643	0.0260198	0	0	11.1029	67.8593	STAT1;BRCA1;TK1
Norovirus Hu/Norwalk/10199/2009/VNM NTPase (gene: POL)	3/14	0.00221643	0.0259744	0	0	11.1029	67.8593	STAT1;BRCA1;TK1
Norovirus Hu/Norwalk/10203/2009/VNM NTPase (gene: POL)	3/14	0.00221643	0.0259292	0	0	11.1029	67.8593	STAT1;BRCA1;TK1
Norovirus Hu/Norwalk/10204/2009/VNM NTPase (gene: POL)	3/14	0.00221643	0.0258841	0	0	11.1029	67.8593	STAT1;BRCA1;TK1
Norovirus Hu/Norwalk/10222/2009/VNM NTPase (gene: POL)	3/14	0.00221643	0.0258391	0	0	11.1029	67.8593	STAT1;BRCA1;TK1
Norovirus Hu/Norwalk/10223/2009/VNM NTPase (gene: POL)	3/14	0.00221643	0.0257943	0	0	11.1029	67.8593	STAT1;BRCA1;TK1
Norovirus Hu/Norwalk/10235/2009/VNM NTPase (gene: POL)	3/14	0.00221643	0.0257497	0	0	11.1029	67.8593	STAT1;BRCA1;TK1
Norovirus Hu/Norwalk/10236/2009/VNM NTPase (gene: POL)	3/14	0.00221643	0.0257052	0	0	11.1029	67.8593	STAT1;BRCA1;TK1
Norovirus Hu/Norwalk/10238/2009/VNM NTPase (gene: POL)	3/14	0.00221643	0.0256609	0	0	11.1029	67.8593	STAT1;BRCA1;TK1
Norovirus Hu/Norwalk/10296/2010/VNM NTPase (gene: POL)	3/14	0.00221643	0.0256168	0	0	11.1029	67.8593	STAT1;BRCA1;TK1
Norovirus Hu/Norwalk/20008/2009/VNM NTPase (gene: POL)	3/14	0.00221643	0.0255727	0	0	11.1029	67.8593	STAT1;BRCA1;TK1
Norovirus Hu/Norwalk/20010/2009/VNM NTPase (gene: POL)	3/14	0.00221643	0.0255289	0	0	11.1029	67.8593	STAT1;BRCA1;TK1
Norovirus Hu/Norwalk/20014/2009/VNM NTPase (gene: POL)	3/14	0.00221643	0.0254852	0	0	11.1029	67.8593	STAT1;BRCA1;TK1
Norovirus Hu/Norwalk/20019/2009/VNM NTPase (gene: POL)	3/14	0.00221643	0.0254416	0	0	11.1029	67.8593	STAT1;BRCA1;TK1
Norovirus Hu/Norwalk/20044/2009/VNM NTPase (gene: POL)	3/14	0.00221643	0.0253982	0	0	11.1029	67.8593	STAT1;BRCA1;TK1
Norovirus Hu/Norwalk/20047/2009/VNM NTPase (gene: POL)	3/14	0.00221643	0.0253549	0	0	11.1029	67.8593	STAT1;BRCA1;TK1
Norovirus Hu/Norwalk/20069/2009/VNM NTPase (gene: POL)	3/14	0.00221643	0.0253118	0	0	11.1029	67.8593	STAT1;BRCA1;TK1
Norovirus Hu/Norwalk/20092/2009/VNM NTPase (gene: POL)	3/14	0.00221643	0.0252688	0	0	11.1029	67.8593	STAT1;BRCA1;TK1
Norovirus Hu/Norwalk/20093/2009/VNM NTPase (gene: POL)	3/14	0.00221643	0.025226	0	0	11.1029	67.8593	STAT1;BRCA1;TK1
Norovirus Hu/Norwalk/20122/2009/VNM NTPase (gene: POL)	3/14	0.00221643	0.0251833	0	0	11.1029	67.8593	STAT1;BRCA1;TK1
Norovirus Hu/Norwalk/20123/2009/VNM NTPase (gene: POL)	3/14	0.00221643	0.0251408	0	0	11.1029	67.8593	STAT1;BRCA1;TK1
Norovirus Hu/Norwalk/20128/2009/VNM NTPase (gene: POL)	3/14	0.00221643	0.0250984	0	0	11.1029	67.8593	STAT1;BRCA1;TK1
Norovirus Hu/Norwalk/20135/2009/VNM NTPase (gene: POL)	3/14	0.00221643	0.0250561	0	0	11.1029	67.8593	STAT1;BRCA1;TK1
Norovirus Hu/Norwalk/20139/2009/VNM NTPase (gene: POL)	3/14	0.00221643	0.025014	0	0	11.1029	67.8593	STAT1;BRCA1;TK1
Norovirus Hu/Norwalk/20142/2009/VNM NTPase (gene: POL)	3/14	0.00221643	0.024972	0	0	11.1029	67.8593	STAT1;BRCA1;TK1
SARS coronavirus nsp13-pp1ab (ZD, NTPase/HEL; RNA (gene: orf1ab)	3/14	0.00221643	0.0249302	0	0	11.1029	67.8593	ISG15;BRCA1;TK1
Human adenovirus 22 IVa2 (gene: IVa2)	5/48	0.00226024	0.0253804	0	0	5.39724	32.8815	STAT1;UBD;TAP1;BRCA1;TK1
Human adenovirus 28 E3 44.5K-like protein (gene: E3)	5/48	0.00226024	0.025338	0	0	5.39724	32.8815	ITGA4;STAT1;CD8A;BRCA1;ECT2
Human adenovirus 64 IVa2 protein	5/48	0.00226024	0.0252958	0	0	5.39724	32.8815	STAT1;UBD;TAP1;BRCA1;TK1
Human adenovirus D37 pIVa2 (gene: pIVa2)	5/48	0.00226024	0.0252537	0	0	5.39724	32.8815	STAT1;UBD;TAP1;BRCA1;TK1
Human enterovirus C104 VP1	5/48	0.00226024	0.0252118	0	0	5.39724	32.8815	ITGA4;STAT1;CD8A;UBD;BRCA1
Human papillomavirus 109 E2 protein (gene: E2)	5/48	0.00226024	0.02517	0	0	5.39724	32.8815	ITGA4;STAT1;CD8A;UBD;BRCA1
Human papillomavirus 111 E7 protein (gene: E7)	5/48	0.00226024	0.0251283	0	0	5.39724	32.8815	CCNB1;ITGA4;STAT1;UBD;BRCA1
Human papillomavirus 19 early protein (gene: E2)	5/48	0.00226024	0.0250867	0	0	5.39724	32.8815	ITGA4;STAT1;CD8A;UBD;BRCA1
Norovirus Hu/GII/BG1C0204/2011/BGD capsid protein VP1 (gene: VP1)	5/48	0.00226024	0.0250453	0	0	5.39724	32.8815	ITGA4;STAT1;CD8A;UBD;BRCA1
Norovirus Hu/GII/BG1C0270/2011/BGD capsid protein VP1 (gene: VP1)	5/48	0.00226024	0.0250041	0	0	5.39724	32.8815	ITGA4;STAT1;CD8A;UBD;BRCA1
Norovirus Hu/GII/BG1C0317/2011/BGD capsid protein VP1 (gene: VP1)	5/48	0.00226024	0.024963	0	0	5.39724	32.8815	ITGA4;STAT1;CD8A;UBD;BRCA1
Norovirus Hu/Norwalk/20094/2009/VNM capsid protein VP1 (gene: VP1)	5/48	0.00226024	0.024922	0	0	5.39724	32.8815	ITGA4;STAT1;CD8A;UBD;BRCA1
Human adenovirus 22 50.0 kDa protein (gene: E3)	7/94	0.00229376	0.0252502	0	0	3.85845	23.45	ITGA4;CD8A;STAT1;UBD;CRTAM;BRCA1;ECT2
Hepatitis C virus subtype 4v full_polyprotein 1..3005	6/70	0.00230441	0.0253259	0	0	4.44115	26.9708	ITGA4;CD8A;STAT1;BRCA1;HIST2H2AC;HIST1H2AB
Horsepox virus HSPV192 (IL-beta-binding protein; Provisional)	10/177	0.0023714	0.0260196	0	0	2.92731	17.6935	ITGA4;CD8A;STAT1;UBD;CRTAM;SLAMF6;BRCA1;ICOS;LILRB4;IL18BP
Ntaya virus full_polyprotein 1..3427	7/95	0.00243609	0.0266857	0	0	3.81783	22.9733	ITGA4;CD8A;STAT1;UBD;BRCA1;TK1;THY1
Human adenovirus 64 E3 48.9 kDa protein	10/178	0.00247058	0.0270194	0	0	2.91087	17.4748	ITGA4;CD8A;CHL1;STAT1;UBD;CRTAM;SLAMF6;BRCA1;ECT2;IL18BP
Cosavirus JMY-2014 full_polyprotein 1..2119	6/71	0.00247701	0.0270457	0	0	4.3786	26.2747	ITGA4;CD8A;STAT1;UBD;BRCA1;CFB
Human alphaherpesvirus 2 envelope glycoprotein D (gene: US6)	6/71	0.00247701	0.0270018	0	0	4.3786	26.2747	ITGA4;CD8A;STAT1;UBD;CD48;SLAMF6
Influenza A virus (A/Northern Territory/60/1968(H3N2)) HA1 (gene: HA)	6/71	0.00247701	0.0269581	0	0	4.3786	26.2747	CD274;CD8A;STAT1;BRCA1;THY1;ICOS
Louping ill virus nonstructural protein NS3	6/71	0.00247701	0.0269144	0	0	4.3786	26.2747	ITGA4;CD8A;STAT1;UBD;BRCA1;TK1
SARS coronavirus P2 spike glycoprotein precursor	6/71	0.00247701	0.026871	0	0	4.3786	26.2747	CD8A;STAT1;BRCA1;THY1;PDCD1;ICOS
West Nile virus SA93/01 envelope protein	6/71	0.00247701	0.0268276	0	0	4.3786	26.2747	ITGA4;CD8A;STAT1;UBD;BRCA1;THY1
West Nile virus SPU116/89 envelope protein	6/71	0.00247701	0.0267844	0	0	4.3786	26.2747	ITGA4;CD8A;STAT1;UBD;BRCA1;THY1
Coxsackievirus A17 2C	5/49	0.00247789	0.0267509	0	0	5.28709	31.7244	STAT1;FIGNL1;UBD;BRCA1;TK1
Ectromelia virus ERPV cd47-like protein	5/49	0.00247789	0.0267079	0	0	5.28709	31.7244	ITGA4;CD8A;STAT1;UBD;BRCA1
Human adenovirus 61 E4 ORF1	5/49	0.00247789	0.0266651	0	0	5.28709	31.7244	ITGA4;CD8A;STAT1;UBD;BRCA1
Human enterovirus C117 VP1	5/49	0.00247789	0.0266225	0	0	5.28709	31.7244	ITGA4;CD8A;STAT1;UBD;BRCA1
Norovirus Hu/Norwalk/10137/2009/VNM capsid protein VP1 (gene: VP1)	5/49	0.00247789	0.0265799	0	0	5.28709	31.7244	ITGA4;CD8A;STAT1;UBD;BRCA1
Norovirus Hu/Norwalk/10223/2009/VNM capsid protein VP1 (gene: VP1)	5/49	0.00247789	0.0265375	0	0	5.28709	31.7244	ITGA4;CD8A;STAT1;UBD;BRCA1
Norovirus Hu/Norwalk/20044/2009/VNM capsid protein VP1 (gene: VP1)	5/49	0.00247789	0.0264953	0	0	5.28709	31.7244	ITGA4;CD8A;STAT1;UBD;BRCA1
Aichi virus 1 VP0	4/30	0.00251694	0.02687	0	0	6.90846	41.3452	ITGA4;STAT1;CD8A;BRCA1
Coxsackievirus A1 2C	4/30	0.00251694	0.0268273	0	0	6.90846	41.3452	STAT1;FIGNL1;BRCA1;TK1
Echovirus E20 2C	4/30	0.00251694	0.0267848	0	0	6.90846	41.3452	STAT1;UBD;BRCA1;TK1
Human papillomavirus 99 E1 protein (gene: E1)	4/30	0.00251694	0.0267425	0	0	6.90846	41.3452	STAT1;CD8A;BRCA1;TK1
Human papillomavirus type 12 early protein (gene: E7)	4/30	0.00251694	0.0267002	0	0	6.90846	41.3452	ITGA4;CD8A;UBD;BRCA1
Human papillomavirus type 26 early protein (gene: E7)	4/30	0.00251694	0.0266581	0	0	6.90846	41.3452	CCNB1;ITGA4;UBD;BRCA1
Human papillomavirus type 92 E1	4/30	0.00251694	0.0266161	0	0	6.90846	41.3452	STAT1;CD8A;BRCA1;TK1
Human rhinovirus A1 2C	4/30	0.00251694	0.0265743	0	0	6.90846	41.3452	STAT1;FIGNL1;BRCA1;TK1
Human rhinovirus A20 1D	4/30	0.00251694	0.0265325	0	0	6.90846	41.3452	STAT1;CD8A;UBD;BRCA1
Human rhinovirus A29 1D	4/30	0.00251694	0.026491	0	0	6.90846	41.3452	STAT1;CD8A;UBD;BRCA1
Human rhinovirus A74 2C (P2-C)	4/30	0.00251694	0.0264495	0	0	6.90846	41.3452	STAT1;FIGNL1;BRCA1;TK1
Mumps virus phoshoprotein (gene: V/P)	12/241	0.00262651	0.0275578	0	0	2.57992	15.3302	ITK;PSTPIP1;ITGA4;STAT1;LCK;UBD;BRCA1;PDCD1;ICOS;FYB;HIST2H2AC;HIST1H2AB
Influenza A virus (A/New York/599/1996(H3N2)) hemagglutinin (gene: HA)	6/72	0.00265915	0.0278567	0	0	4.31779	25.6034	CD274;CD8A;STAT1;UBD;THY1;ICOS
SARS coronavirus E2 glycoprotein precursor (gene: S)	6/72	0.00265915	0.0278134	0	0	4.31779	25.6034	CD8A;STAT1;BRCA1;THY1;PDCD1;ICOS
SARS coronavirus Tor2 spike glycoprotein	6/72	0.00265915	0.0277701	0	0	4.31779	25.6034	CD8A;STAT1;BRCA1;THY1;PDCD1;ICOS
West Nile virus lineage 1 envelope protein E (gene: flavivirus polyprotein)	6/72	0.00265915	0.027727	0	0	4.31779	25.6034	ITGA4;CD8A;STAT1;UBD;BRCA1;THY1
Echovirus E4 3D	5/50	0.00271037	0.0282172	0	0	5.18135	30.6252	CD8A;UBD;BRCA1;HIST2H2AC;HIST1H2AB
Human adenovirus 65 pIVa2	5/50	0.00271037	0.0281736	0	0	5.18135	30.6252	STAT1;UBD;TAP1;BRCA1;TK1
Norovirus GII/Hu/JP/2002/GII.P12_GII.13/Saitama/T80 full_polyprotein 1..1699	5/50	0.00271037	0.02813	0	0	5.18135	30.6252	ITGA4;CD8A;STAT1;BRCA1;TK1
Australian bat lyssavirus glycoprotein (gene: G)	3/15	0.00273116	0.0283021	0	0	10.3627	61.1713	ITGA4;STAT1;BRCA1
Cercopithecine alphaherpesvirus 2 tegument protein UL21 (gene: UL21)	3/15	0.00273116	0.0282584	0	0	10.3627	61.1713	ITGA4;STAT1;BRCA1
Cowpox virus CPXV094 protein (gene: CPXV094 CDS)	3/15	0.00273116	0.028215	0	0	10.3627	61.1713	STAT1;CD8A;BRCA1
Ebola virus - Mayinga, Zaire, 1976 VP35 (gene: VP35)	3/15	0.00273116	0.0281716	0	0	10.3627	61.1713	ITGA4;STAT1;BRCA1
Human adenovirus 41 protease	3/15	0.00273116	0.0281284	0	0	10.3627	61.1713	STAT1;UBD;BRCA1
Human adenovirus 52 E4 ORF3 (gene: E4)	3/15	0.00273116	0.0280853	0	0	10.3627	61.1713	STAT1;CD8A;BRCA1
Human immunodeficiency virus 2 vif protein	3/15	0.00273116	0.0280424	0	0	10.3627	61.1713	STAT1;CD8A;BRCA1
Human papillomavirus 135 transforming protein (gene: E6)	3/15	0.00273116	0.0279996	0	0	10.3627	61.1713	ITGA4;STAT1;BRCA1
Measles virus strain MVi/California.USA/16.03 hemagglutinin protein (gene: H)	3/15	0.00273116	0.0279569	0	0	10.3627	61.1713	CD96;SLAMF8;CD48
Middle East respiratory syndrome-related coronavirus nsp12 protein (gene: orf1ab)	3/15	0.00273116	0.0279144	0	0	10.3627	61.1713	CD8A;ISG15;BRCA1
Norovirus Hu/GII.4/HS292/2012/USA NTPase (gene: POL)	3/15	0.00273116	0.0278719	0	0	10.3627	61.1713	STAT1;BRCA1;TK1
Norovirus Hu/GII/20469/2010/VNM NTPase (gene: POL)	3/15	0.00273116	0.0278296	0	0	10.3627	61.1713	STAT1;BRCA1;TK1
Norovirus Hu/GII/20477/2010/VNM NTPase (gene: POL)	3/15	0.00273116	0.0277875	0	0	10.3627	61.1713	STAT1;BRCA1;TK1
Norovirus Hu/GII/BG1C0066/2011/BGD NTPase (gene: POL)	3/15	0.00273116	0.0277454	0	0	10.3627	61.1713	STAT1;BRCA1;TK1
Norovirus Hu/GII/BG1C0204/2011/BGD NTPase (gene: POL)	3/15	0.00273116	0.0277035	0	0	10.3627	61.1713	STAT1;BRCA1;TK1
Norovirus Hu/GII/BG1C0241-33/2011/BGD NTPase (gene: POL)	3/15	0.00273116	0.0276617	0	0	10.3627	61.1713	STAT1;BRCA1;TK1
Norovirus Hu/GII/BG1C0270/2011/BGD NTPase (gene: POL)	3/15	0.00273116	0.0276201	0	0	10.3627	61.1713	STAT1;BRCA1;TK1
Norovirus Hu/GII/BG1C0282/2011/BGD NTPase (gene: POL)	3/15	0.00273116	0.0275785	0	0	10.3627	61.1713	STAT1;BRCA1;TK1
Norovirus Hu/GII/BG1C0317/2011/BGD NTPase (gene: POL)	3/15	0.00273116	0.0275371	0	0	10.3627	61.1713	STAT1;BRCA1;TK1
Norovirus Hu/Norwalk/10051/2009/VNM NTPase (gene: POL)	3/15	0.00273116	0.0274959	0	0	10.3627	61.1713	STAT1;BRCA1;TK1
Norovirus Hu/Norwalk/10285/2010/VNM NTPase (gene: POL)	3/15	0.00273116	0.0274547	0	0	10.3627	61.1713	STAT1;BRCA1;TK1
Norovirus Hu/Norwalk/10313/2010/VNM NTPase (gene: POL)	3/15	0.00273116	0.0274137	0	0	10.3627	61.1713	STAT1;BRCA1;TK1
Norovirus Hu/Norwalk/10325/2010/VNM NTPase (gene: POL)	3/15	0.00273116	0.0273727	0	0	10.3627	61.1713	STAT1;BRCA1;TK1
Norovirus Hu/Norwalk/10328/2010/VNM NTPase (gene: POL)	3/15	0.00273116	0.0273319	0	0	10.3627	61.1713	STAT1;BRCA1;TK1
Norovirus Hu/Norwalk/10368/2010/VNM NTPase (gene: POL)	3/15	0.00273116	0.0272913	0	0	10.3627	61.1713	STAT1;BRCA1;TK1
Norovirus Hu/Norwalk/10378/2010/VNM NTPase (gene: POL)	3/15	0.00273116	0.0272507	0	0	10.3627	61.1713	STAT1;BRCA1;TK1
Norovirus Hu/Norwalk/10386/2010/VNM NTPase (gene: POL)	3/15	0.00273116	0.0272103	0	0	10.3627	61.1713	STAT1;BRCA1;TK1
Rotavirus A outer capsid spike protein VP4	3/15	0.00273116	0.02717	0	0	10.3627	61.1713	STAT1;CD8A;BRCA1
Titi monkey adenovirus ECC-2011 protease	3/15	0.00273116	0.0271298	0	0	10.3627	61.1713	STAT1;UBD;BRCA1
Venezuelan equine encephalitis virus E1 envelope glycoprotein (gene: 26S mRNA)	3/15	0.00273116	0.0270897	0	0	10.3627	61.1713	ITGA4;STAT1;BRCA1
Zaire ebolavirus polymerase complex protein (gene: VP35)	3/15	0.00273116	0.0270498	0	0	10.3627	61.1713	ITGA4;STAT1;BRCA1
Astrovirus VA1 non-structural protein 1ab	4/31	0.00284638	0.0281494	0	0	6.68561	39.1891	ITGA4;STAT1;CD8A;BRCA1
Barmah Forest virus full_polyprotein 1..2411	4/31	0.00284638	0.028108	0	0	6.68561	39.1891	ITGA4;STAT1;UBD;BRCA1
Echovirus E14 2C	4/31	0.00284638	0.0280667	0	0	6.68561	39.1891	STAT1;FIGNL1;BRCA1;TK1
Human betaherpesvirus 5 membrane glycoprotein UL141 (gene: UL141)	4/31	0.00284638	0.0280256	0	0	6.68561	39.1891	STAT1;CD8A;UBD;BRCA1
Human papillomavirus 134 E7 (gene: E7)	4/31	0.00284638	0.0279846	0	0	6.68561	39.1891	ITGA4;STAT1;UBD;BRCA1
Human papillomavirus 148 E7 (gene: E7)	4/31	0.00284638	0.0279436	0	0	6.68561	39.1891	ITGA4;STAT1;UBD;BRCA1
Human papillomavirus 167 E7 (gene: E7)	4/31	0.00284638	0.0279028	0	0	6.68561	39.1891	ITGA4;CD8A;UBD;BRCA1
Human papillomavirus type 101 E1	4/31	0.00284638	0.0278622	0	0	6.68561	39.1891	STAT1;CD8A;BRCA1;TK1
Human papillomavirus type 6 E1 (gene: E1)	4/31	0.00284638	0.0278216	0	0	6.68561	39.1891	ITGA4;STAT1;BRCA1;TK1
Human papillomavirus type 82 E7	4/31	0.00284638	0.0277812	0	0	6.68561	39.1891	CCNB1;ITGA4;UBD;BRCA1
Human rhinovirus A53 2C (P2-C)	4/31	0.00284638	0.0277409	0	0	6.68561	39.1891	STAT1;UBD;BRCA1;TK1
Human rhinovirus B99 1D	4/31	0.00284638	0.0277007	0	0	6.68561	39.1891	STAT1;CD8A;UBD;BRCA1
Human rhinovirus QCE VP2	4/31	0.00284638	0.0276606	0	0	6.68561	39.1891	STAT1;CD8A;BRCA1;CFB
Mupapillomavirus 1 E1	4/31	0.00284638	0.0276206	0	0	6.68561	39.1891	STAT1;CD8A;BRCA1;TK1
Rhinovirus B14 2C (P2-C)	4/31	0.00284638	0.0275807	0	0	6.68561	39.1891	STAT1;FIGNL1;BRCA1;TK1
Orf virus ORF110 EEV glycoprotein	6/73	0.00285114	0.0275871	0	0	4.25864	24.9558	CCL8;KLRC3;STAT1;CCL5;KLRC1;CLEC4E
Variola virus double-strand RNA-binding protein (gene: E3L)	6/73	0.00285114	0.0275474	0	0	4.25864	24.9558	ITGA4;STAT1;UBD;BRCA1;HIST2H2AC;HIST1H2AB
Horsepox virus HSPV114 (Eukaryotic-type carbonic anhydrase)	5/51	0.00295823	0.028541	0	0	5.07975	29.5802	CD96;CD8A;THY1;PDCD1;ICOS
Human adenovirus 68 maturation protein IVA2 (gene: IVa2)	5/51	0.00295823	0.0285001	0	0	5.07975	29.5802	STAT1;UBD;TAP1;BRCA1;TK1
Human adenovirus Chiba_E086/2012 pIVa2 (gene: pIVa2)	5/51	0.00295823	0.0284592	0	0	5.07975	29.5802	STAT1;UBD;TAP1;BRCA1;TK1
Influenza A virus (A/Korea/426/1968(H2N2)) neuraminidase (gene: NA)	5/51	0.00295823	0.0284185	0	0	5.07975	29.5802	CD274;ITGA4;CD8A;STAT1;THY1
Norovirus Hu/Norwalk/10074/2009/VNM capsid protein VP1 (gene: VP1)	5/51	0.00295823	0.0283779	0	0	5.07975	29.5802	ITGA4;CD8A;STAT1;UBD;BRCA1
Norovirus Hu/Norwalk/10162/2009/VNM capsid protein VP1 (gene: VP1)	5/51	0.00295823	0.0283374	0	0	5.07975	29.5802	ITGA4;CD8A;STAT1;UBD;BRCA1
Norovirus Hu/Norwalk/10173/2009/VNM capsid protein VP1 (gene: VP1)	5/51	0.00295823	0.0282971	0	0	5.07975	29.5802	ITGA4;CD8A;STAT1;UBD;BRCA1
Norovirus Hu/Norwalk/20016/2009/VNM capsid protein VP1 (gene: VP1)	5/51	0.00295823	0.0282568	0	0	5.07975	29.5802	ITGA4;CD8A;STAT1;UBD;BRCA1
Norovirus Hu/Norwalk/20035/2009/VNM capsid protein VP1 (gene: VP1)	5/51	0.00295823	0.0282167	0	0	5.07975	29.5802	ITGA4;CD8A;STAT1;UBD;BRCA1
Norovirus Hu/Norwalk/20047/2009/VNM capsid protein VP1 (gene: VP1)	5/51	0.00295823	0.0281767	0	0	5.07975	29.5802	ITGA4;CD8A;STAT1;UBD;BRCA1
WU Polyomavirus large T antigen	5/51	0.00295823	0.0281368	0	0	5.07975	29.5802	CD8A;STAT1;UBD;BRCA1;TK1
Human immunodeficiency virus pol protein (gene: pol)	12/245	0.00300309	0.028523	0	0	2.5378	14.7398	RACGAP1;ITGA4;STAT1;CD8A;LCK;UBD;ISG15;LCP2;BRCA1;FYB;HIST2H2AC;HIST1H2AB
Cercopithecine betaherpesvirus 5 membrane protein RL11Q (gene: RL11Q)	10/183	0.00301753	0.0286197	0	0	2.83134	16.4311	CD274;ITGA4;CD8A;STAT1;UBD;CRTAM;CD226;BRCA1;ICOS;LILRB4
West Nile virus SA381/00 envelope protein	6/74	0.00305333	0.0289183	0	0	4.20109	24.3307	ITGA4;CD8A;STAT1;UBD;BRCA1;THY1
Vaccinia virus C-type lectin-like type-II membrane protein (gene: A40R)	9/154	0.00308038	0.0291334	0	0	3.02806	17.5104	CXCL9;KLRK1;CD72;CD8A;KLRC3;STAT1;UBD;KLRC1;CLEC4E
Vaccinia virus Ankara C-type lectin-like protein	9/154	0.00308038	0.0290925	0	0	3.02806	17.5104	CXCL9;KLRK1;CD72;CD8A;KLRC3;STAT1;UBD;KLRC1;CLEC4E
Ebola virus - Mayinga, Zaire, 1976 virion spike glycoprotein precursor (gene: GP)	8/126	0.00311683	0.0293954	0	0	3.28974	18.9849	CD8A;STAT1;PRC1;UBD;TAP1;ISG15;THY1;BRCA1
Human T-lymphotropic virus 2 full_polyprotein 1..982	8/126	0.00311683	0.0293542	0	0	3.28974	18.9849	PSTPIP1;ITGA4;CD8A;LCK;STAT1;UBD;LCP2;BRCA1
Zaire ebolavirus spike glycoprotein (gene: GP)	8/126	0.00311683	0.0293131	0	0	3.28974	18.9849	CD8A;STAT1;PRC1;UBD;TAP1;ISG15;THY1;BRCA1
Dengue virus 4 nonstructural protein NS3 (gene: flavivirus polyprotein)	4/32	0.00320415	0.0300921	0	0	6.47668	37.1976	ITGA4;STAT1;UBD;BRCA1
Human enterovirus 94 2C	4/32	0.00320415	0.0300501	0	0	6.47668	37.1976	STAT1;UBD;BRCA1;TK1
Human papillomavirus type 118 E1	4/32	0.00320415	0.0300081	0	0	6.47668	37.1976	STAT1;CD8A;BRCA1;TK1
Human papillomavirus type 119 transforming protein E7 (gene: E7)	4/32	0.00320415	0.0299663	0	0	6.47668	37.1976	ITGA4;STAT1;UBD;BRCA1
Human papillomavirus type 129 E1 (gene: E1)	4/32	0.00320415	0.0299247	0	0	6.47668	37.1976	STAT1;CD8A;BRCA1;TK1
Human papillomavirus type 48 replication protein E1 (gene: E1)	4/32	0.00320415	0.0298831	0	0	6.47668	37.1976	STAT1;CD8A;BRCA1;TK1
Human rhinovirus A68 1D	4/32	0.00320415	0.0298417	0	0	6.47668	37.1976	STAT1;CD8A;UBD;BRCA1
Human rhinovirus A90 1D	4/32	0.00320415	0.0298003	0	0	6.47668	37.1976	STAT1;CD8A;UBD;BRCA1
Human rhinovirus B70 2C (P2-C)	4/32	0.00320415	0.0297591	0	0	6.47668	37.1976	STAT1;FIGNL1;BRCA1;TK1
Norovirus GII/Hu/JP/2000/GII.P12_GII.12/Saitama/KU16 VP1 (gene: VP1)	4/32	0.00320415	0.029718	0	0	6.47668	37.1976	ITGA4;STAT1;CD8A;BRCA1
Cowpox virus CPXV125 protein (gene: CPV125 CDS)	5/52	0.00322206	0.0298429	0	0	4.98206	28.5858	CD96;CD8A;THY1;PDCD1;ICOS
Echovirus E26 VP1	5/52	0.00322206	0.0298018	0	0	4.98206	28.5858	ITGA4;CD8A;STAT1;UBD;BRCA1
Ectromelia virus ERPV carbonic anhydrase	5/52	0.00322206	0.0297608	0	0	4.98206	28.5858	CD96;CD8A;THY1;PDCD1;ICOS
Enterovirus C109 VP1	5/52	0.00322206	0.02972	0	0	4.98206	28.5858	ITGA4;CD8A;STAT1;UBD;BRCA1
Human adenovirus D8 pIVa2 protein (gene: pIVa2)	5/52	0.00322206	0.0296792	0	0	4.98206	28.5858	STAT1;UBD;TAP1;BRCA1;TK1
Human betaherpesvirus 6 U45 (gene: U45)	5/52	0.00322206	0.0296385	0	0	4.98206	28.5858	ITGA4;CD8A;STAT1;CDK1;BRCA1
Human betaherpesvirus 6A deoxyuridine triphosphatase (gene: U45)	5/52	0.00322206	0.029598	0	0	4.98206	28.5858	ITGA4;CD8A;STAT1;CDK1;BRCA1
Influenza A virus (A/Northern Territory/60/1968(H3N2)) HA2 (gene: HA)	5/52	0.00322206	0.0295576	0	0	4.98206	28.5858	CD274;CD8A;STAT1;UBD;THY1
Norovirus GII/Hu/JP/2001/GII.P22_GII.5/Saitama/T49 VP1 (gene: VP1)	5/52	0.00322206	0.0295172	0	0	4.98206	28.5858	ITGA4;CD8A;STAT1;BRCA1;ICOS
Norovirus GII/Hu/JP/2010/GII.P4_GII.4/Shimada/ASC96 VP1 (gene: VP1)	5/52	0.00322206	0.029477	0	0	4.98206	28.5858	ITGA4;CD8A;STAT1;UBD;BRCA1
Norovirus Hu/GII-4/CBNU2/2007/KR capsid protein	5/52	0.00322206	0.0294369	0	0	4.98206	28.5858	ITGA4;CD8A;STAT1;UBD;BRCA1
Norovirus Hu/GII.4/Berowra/NSW767L/2012/AU VP1	5/52	0.00322206	0.0293969	0	0	4.98206	28.5858	ITGA4;CD8A;STAT1;UBD;BRCA1
Norovirus Hu/GII.4/JB-15/KOR/2008 full_polyprotein 1..1699	5/52	0.00322206	0.029357	0	0	4.98206	28.5858	ITGA4;CD8A;STAT1;BRCA1;TK1
Norovirus Hu/GII.4/NIHIC11.3/2013/USA capsid protein VP1 (gene: VP1)	5/52	0.00322206	0.0293173	0	0	4.98206	28.5858	ITGA4;CD8A;STAT1;UBD;BRCA1
Norovirus Hu/Norwalk/10247/2009/VNM capsid protein VP1 (gene: VP1)	5/52	0.00322206	0.0292776	0	0	4.98206	28.5858	ITGA4;CD8A;STAT1;UBD;BRCA1
Horsepox virus HSPV155 (IEV and EEV membrane glycoprotein; Provisional)	8/127	0.00327185	0.0296898	0	0	3.26384	18.677	KLRK1;CD72;ITGA4;CD8A;KLRC3;STAT1;KLRC1;CLEC4E
GB virus C (Pegivirus C, HPgV) putative E1 protein	3/16	0.00331369	0.030029	0	0	9.71503	55.4698	STAT1;CD8A;BRCA1
Human adenovirus E4 protein IIIa	3/16	0.00331369	0.0299885	0	0	9.71503	55.4698	ITGA4;STAT1;BRCA1
Human enterovirus C104 3C	3/16	0.00331369	0.0299481	0	0	9.71503	55.4698	STAT1;CD8A;BRCA1
Human enterovirus C117 3C	3/16	0.00331369	0.0299079	0	0	9.71503	55.4698	STAT1;CD8A;BRCA1
Human mastadenovirus E capsid protein precursor pIIIa (gene: L1)	3/16	0.00331369	0.0298677	0	0	9.71503	55.4698	ITGA4;STAT1;BRCA1
Human papillomavirus type 54 replication protein (gene: E1)	3/16	0.00331369	0.0298277	0	0	9.71503	55.4698	STAT1;BRCA1;TK1
Human papillomavirus type 67 E1	3/16	0.00331369	0.0297878	0	0	9.71503	55.4698	STAT1;CD8A;TK1
Human papillomavirus type 78 replication protein E1 (gene: E1)	3/16	0.00331369	0.0297479	0	0	9.71503	55.4698	ITGA4;BRCA1;TK1
Human rhinovirus A25 2C	3/16	0.00331369	0.0297082	0	0	9.71503	55.4698	STAT1;BRCA1;TK1
Human rhinovirus A80 2C	3/16	0.00331369	0.0296686	0	0	9.71503	55.4698	STAT1;BRCA1;TK1
Menangle virus V protein (gene: V/P)	3/16	0.00331369	0.0296291	0	0	9.71503	55.4698	ITGA4;STAT1;BRCA1
Middle East respiratory syndrome-related coronavirus nsp16 protein (gene: orf1ab)	3/16	0.00331369	0.0295897	0	0	9.71503	55.4698	STAT1;ISG15;BRCA1
Norovirus GI/Hu/JP/2007/GI.P8_GI.8/Nagoya/KY531 VP1 (gene: VP1)	3/16	0.00331369	0.0295504	0	0	9.71503	55.4698	ITGA4;STAT1;BRCA1
O'nyong-nyong virus E1 protein	3/16	0.00331369	0.0295112	0	0	9.71503	55.4698	ITGA4;STAT1;BRCA1
Rhinovirus C protease 3C	3/16	0.00331369	0.0294721	0	0	9.71503	55.4698	ITGA4;STAT1;CD8A
SARS coronavirus nsp4-pp1a/pp1ab (gene: orf1ab)	3/16	0.00331369	0.0294331	0	0	9.71503	55.4698	STAT1;ISG15;BRCA1
Human adenovirus 3+7 maturation protein IVA2 (gene: IVa2)	6/76	0.00348957	0.0309544	0	0	4.09054	23.1442	STAT1;UBD;TAP1;ISG15;BRCA1;TK1
Influenza A virus (A/New York/602/1996(H3N2)) hemagglutinin (gene: HA)	6/76	0.00348957	0.0309136	0	0	4.09054	23.1442	CD274;CD8A;STAT1;UBD;THY1;ICOS
Rio Bravo virus envelope protein	6/76	0.00348957	0.0308728	0	0	4.09054	23.1442	ITGA4;CD8A;STAT1;UBD;BRCA1;ICOS
Coxsackievirus A1 3D	5/53	0.00350241	0.0309456	0	0	4.88806	27.6386	CD8A;UBD;BRCA1;HIST2H2AC;HIST1H2AB
Horsepox virus HSPV077 (Vaccinia virus I7 processing peptidase)	5/53	0.00350241	0.030905	0	0	4.88806	27.6386	CD8A;STAT1;UBD;ISG15;BRCA1
Human papillomavirus type 56 envelope protein (gene: E7)	5/53	0.00350241	0.0308644	0	0	4.88806	27.6386	ITGA4;CD8A;STAT1;UBD;BRCA1
Langat virus nonstructural protein NS3	5/53	0.00350241	0.030824	0	0	4.88806	27.6386	ITGA4;CD8A;STAT1;UBD;BRCA1
Norovirus Hu/GII-4/CGMH13/2007/TW major viral capsid protein (gene: VP1)	5/53	0.00350241	0.0307836	0	0	4.88806	27.6386	ITGA4;CD8A;STAT1;UBD;BRCA1
Norovirus Hu/GII.4/CHDC4108/1987/US VP1	5/53	0.00350241	0.0307434	0	0	4.88806	27.6386	ITGA4;CD8A;STAT1;UBD;BRCA1
Norovirus Hu/GIV.1/LakeMacquarie/NSW268O/2010/AU full_polyprotein 1..1687	5/53	0.00350241	0.0307033	0	0	4.88806	27.6386	ITGA4;CD8A;STAT1;BRCA1;TK1
Norovirus Hu/Norwalk/10051/2009/VNM capsid protein VP1 (gene: VP1)	5/53	0.00350241	0.0306632	0	0	4.88806	27.6386	ITGA4;CD8A;STAT1;UBD;BRCA1
Norovirus Hu/Norwalk/10116/2009/VNM capsid protein VP1 (gene: VP1)	5/53	0.00350241	0.0306233	0	0	4.88806	27.6386	ITGA4;CD8A;STAT1;UBD;BRCA1
Norovirus Hu/Norwalk/10183/2009/VNM capsid protein VP1 (gene: VP1)	5/53	0.00350241	0.0305835	0	0	4.88806	27.6386	ITGA4;CD8A;STAT1;UBD;BRCA1
Norovirus Hu/Norwalk/10236/2009/VNM capsid protein VP1 (gene: VP1)	5/53	0.00350241	0.0305438	0	0	4.88806	27.6386	ITGA4;CD8A;STAT1;UBD;BRCA1
Vaccinia virus Ankara IMV chondroitin-binding membrane protein	5/53	0.00350241	0.0305041	0	0	4.88806	27.6386	CD96;CD8A;THY1;PDCD1;ICOS
Yaba monkey tumor virus MHC-like TNF binding protein	5/53	0.00350241	0.0304646	0	0	4.88806	27.6386	ITGA4;CD8A;STAT1;BRCA1;TNF
Human immunodeficiency virus 1 integrase (gene: gag-pol)	11/218	0.00352565	0.0306271	0	0	2.61444	14.7656	PSTPIP1;ITGA4;STAT1;CD8A;LCK;UBD;MYBL2;LCP2;BRCA1;FYB;HIST2H2AC
Cowpox virus CPXV024 protein (gene: CPXV024 CDS)	2/5	0.00357473	0.0310133	0	0	20.7254	116.764	STAT1;BRCA1
European bat 1 lyssavirus phosphoprotein (gene: P)	2/5	0.00357473	0.0309733	0	0	20.7254	116.764	STAT1;BRCA1
Human alphaherpesvirus 2 nuclear egress membrane protein (gene: UL34)	2/5	0.00357473	0.0309334	0	0	20.7254	116.764	STAT1;BRCA1
Human coronavirus HKU1 hemagglutinin-esterase glycoprotein (gene: HE)	2/5	0.00357473	0.0308936	0	0	20.7254	116.764	STAT1;BRCA1
Human papillomavirus 173 E6	2/5	0.00357473	0.0308539	0	0	20.7254	116.764	STAT1;BRCA1
Human rhinovirus A53 2A (P2-A)	2/5	0.00357473	0.0308143	0	0	20.7254	116.764	STAT1;BRCA1
Human rhinovirus B42 3C	2/5	0.00357473	0.0307748	0	0	20.7254	116.764	STAT1;BRCA1
Human rhinovirus B5 3C	2/5	0.00357473	0.0307354	0	0	20.7254	116.764	STAT1;BRCA1
Human rhinovirus B92 3C	2/5	0.00357473	0.0306961	0	0	20.7254	116.764	ITGA4;STAT1
Monkeypox virus interleukin-18-binding protein	2/5	0.00357473	0.0306569	0	0	20.7254	116.764	STAT1;BRCA1
Monkeypox virus Zaire-96-I-16 IL-18 binding protein (gene: D6L)	2/5	0.00357473	0.0306178	0	0	20.7254	116.764	STAT1;BRCA1
Rotavirus C major inner capsid protein (gene: VP6)	2/5	0.00357473	0.0305788	0	0	20.7254	116.764	ITGA4;BRCA1
Vaccinia virus Ankara Interleukin-18-binding protein	2/5	0.00357473	0.0305398	0	0	20.7254	116.764	STAT1;BRCA1
Variola virus IL-18 binding protein (gene: D5L)	2/5	0.00357473	0.030501	0	0	20.7254	116.764	STAT1;BRCA1
Cercopithecine betaherpesvirus 5 membrane protein RL11G (gene: RL11G)	4/33	0.00359137	0.0306041	0	0	6.28042	35.3539	ITGA4;STAT1;CD8A;BRCA1
Echovirus E7 2C	4/33	0.00359137	0.0305653	0	0	6.28042	35.3539	STAT1;UBD;BRCA1;TK1
Human alphaherpesvirus 3 envelope glycoprotein E (gene: ORF68)	4/33	0.00359137	0.0305266	0	0	6.28042	35.3539	ITGA4;STAT1;CD8A;BRCA1
Human coronavirus 229E nucleocapsid protein (gene: N)	4/33	0.00359137	0.030488	0	0	6.28042	35.3539	ITGA4;STAT1;CD8A;BRCA1
Human cosavirus E 2C	4/33	0.00359137	0.0304495	0	0	6.28042	35.3539	STAT1;UBD;BRCA1;TK1
Human enterovirus 79 2C	4/33	0.00359137	0.0304111	0	0	6.28042	35.3539	STAT1;UBD;BRCA1;TK1
Human herpesvirus 3 strain Dumas membrane glycoprotein gE	4/33	0.00359137	0.0303728	0	0	6.28042	35.3539	ITGA4;STAT1;CD8A;BRCA1
Human papillomavirus E7 (gene: E7)	4/33	0.00359137	0.0303346	0	0	6.28042	35.3539	ITGA4;CD8A;UBD;BRCA1
Human papillomavirus 5 transforming protein (gene: E7)	4/33	0.00359137	0.0302965	0	0	6.28042	35.3539	STAT1;CD8A;UBD;BRCA1
Human papillomavirus type 13 E7 (gene: E7)	4/33	0.00359137	0.0302585	0	0	6.28042	35.3539	ITGA4;STAT1;UBD;BRCA1
Human rhinovirus A32 2C	4/33	0.00359137	0.0302206	0	0	6.28042	35.3539	STAT1;UBD;BRCA1;TK1
Human rhinovirus A55 1D (VP1)	4/33	0.00359137	0.0301828	0	0	6.28042	35.3539	STAT1;CD8A;UBD;BRCA1
Norovirus GII/Hu/JP/2001/GII.P12_GII.12/Saitama/T15 VP1 (gene: VP1)	4/33	0.00359137	0.030145	0	0	6.28042	35.3539	ITGA4;STAT1;CD8A;BRCA1
Norovirus GII/Hu/JP/2001/GII.P12_GII.12/Saitama/T18 VP1 (gene: VP1)	4/33	0.00359137	0.0301074	0	0	6.28042	35.3539	ITGA4;STAT1;CD8A;BRCA1
Norovirus GII/Hu/JP/2002/GII.P16_GII.17/Saitama/T87 VP1 (gene: VP1)	4/33	0.00359137	0.0300699	0	0	6.28042	35.3539	ITGA4;STAT1;CD8A;BRCA1
Papiine alphaherpesvirus 2 deoxyuridine triphosphatase (gene: UL50)	4/33	0.00359137	0.0300324	0	0	6.28042	35.3539	ITGA4;STAT1;CD8A;BRCA1
Sabia mammarenavirus Z protein	4/33	0.00359137	0.0299951	0	0	6.28042	35.3539	STAT1;LPXN;BRCA1;TK1
Seoul virus glycoprotein precusor	4/33	0.00359137	0.0299578	0	0	6.28042	35.3539	ITGA4;STAT1;CD8A;BRCA1
Seoul virus 80-39 glycoprotein precusor	4/33	0.00359137	0.0299206	0	0	6.28042	35.3539	ITGA4;STAT1;CD8A;BRCA1
Human rhinovirus B37 full_polyprotein 1..2178	7/102	0.0036317	0.0302191	0	0	3.55583	19.9768	ITGA4;CD8A;STAT1;UBD;BRCA1;TK1;ICOS
Cowpox virus CPXV057 protein (gene: CPXV057 CDS)	16/387	0.00368262	0.0306049	0	0	2.14216	12.0049	ITK;ITGA4;STAT1;PLK1;ISG15;BRCA1;AURKA;CCNA2;CCNB2;CCNB1;MELK;LCK;CCNE1;CD8A;UBD;CDK1
Human mastadenovirus B encapsidation protein IVa2 (gene: IVa2)	6/77	0.0037243	0.0309131	0	0	4.03741	22.5808	STAT1;UBD;TAP1;ISG15;BRCA1;TK1
West Nile virus H442 envelope protein	6/77	0.0037243	0.0308749	0	0	4.03741	22.5808	ITGA4;CD8A;STAT1;UBD;BRCA1;THY1
Human adenovirus 12 fiber protein	5/54	0.00379986	0.0314624	0	0	4.79754	26.7357	CD274;STAT1;CRTAM;SLAMF7;BRCA1
Human calicivirus Hu/NLV/GII/MD145-12/1987/US capsid protein	5/54	0.00379986	0.0314237	0	0	4.79754	26.7357	ITGA4;CD8A;STAT1;UBD;BRCA1
Human mastadenovirus A fiber	5/54	0.00379986	0.031385	0	0	4.79754	26.7357	CD274;STAT1;CRTAM;SLAMF7;BRCA1
Human papillomavirus 120 regulatory protein E2 (gene: E2)	5/54	0.00379986	0.0313465	0	0	4.79754	26.7357	ITGA4;CD8A;STAT1;UBD;BRCA1
Human papillomavirus 152 early protein E7 (gene: E7)	5/54	0.00379986	0.031308	0	0	4.79754	26.7357	ITGA4;CD8A;STAT1;UBD;BRCA1
Human papillomavirus type 101 E2 protein	5/54	0.00379986	0.0312697	0	0	4.79754	26.7357	ITGA4;CD8A;STAT1;UBD;BRCA1
Human papillomavirus type 25 early protein (gene: E2)	5/54	0.00379986	0.0312314	0	0	4.79754	26.7357	ITGA4;CD8A;STAT1;UBD;BRCA1
Influenza A virus (A/Korea/426/1968(H2N2)) HA1 (gene: HA)	5/54	0.00379986	0.0311932	0	0	4.79754	26.7357	CD274;CD8A;STAT1;THY1;PDCD1
Lordsdale virus capsid protein (gene: orf2)	5/54	0.00379986	0.0311551	0	0	4.79754	26.7357	ITGA4;CD8A;STAT1;UBD;BRCA1
Norovirus GII/Hu/TW/2012/GII.Pe_GII.4_Sydney2012/Taipei/108 VP1 (gene: VP1)	5/54	0.00379986	0.0311171	0	0	4.79754	26.7357	ITGA4;CD8A;STAT1;UBD;BRCA1
Norovirus GII/Hu/TW/2012/GII.Pe_GII.4_Sydney2012/Taipei/109 VP1 (gene: VP1)	5/54	0.00379986	0.0310792	0	0	4.79754	26.7357	ITGA4;CD8A;STAT1;UBD;BRCA1
Norovirus Hu/GII-4/CGMH23/2010/TW major viral capsid protein (gene: VP1)	5/54	0.00379986	0.0310414	0	0	4.79754	26.7357	ITGA4;CD8A;STAT1;UBD;BRCA1
Norovirus Hu/GII-4/CGMH26/2010/TW major viral capsid protein (gene: VP1)	5/54	0.00379986	0.0310037	0	0	4.79754	26.7357	ITGA4;CD8A;STAT1;UBD;BRCA1
Norovirus Hu/GII-4/CUK-3/2008/KR capsid protein	5/54	0.00379986	0.0309661	0	0	4.79754	26.7357	ITGA4;CD8A;STAT1;UBD;BRCA1
Norovirus Hu/GII.4/CHDC3967/1988/US VP1	5/54	0.00379986	0.0309285	0	0	4.79754	26.7357	ITGA4;CD8A;STAT1;UBD;BRCA1
Norovirus Hu/GII.4/GZ2010-L87/Guangzhou/CHN/2011 major viral capsid protein (gene: VP1)	5/54	0.00379986	0.0308911	0	0	4.79754	26.7357	ITGA4;CD8A;STAT1;UBD;BRCA1
Norovirus Hu/Norwalk/10368/2010/VNM capsid protein VP1 (gene: VP1)	5/54	0.00379986	0.0308537	0	0	4.79754	26.7357	ITGA4;CD8A;STAT1;UBD;BRCA1
Cercopithecine betaherpesvirus 5 membrane protein RL11M (gene: RL11M)	9/159	0.00380691	0.0308736	0	0	2.93284	16.3387	ITGA4;CD8A;STAT1;UBD;CRTAM;SLAMF8;SLAMF7;CD226;ICOS
Rotavirus A NSP3 (gene: NSP3)	7/103	0.00383352	0.0310519	0	0	3.5213	19.5924	PSTPIP1;STAT1;UBD;CDCA8;BRCA1;HIST1H2AB;HIST2H2AC
Human T-lymphotropic virus 3 polymerase (gene: pol)	8/131	0.00395265	0.0319784	0	0	3.16418	17.5086	ITGA4;CD8A;LCK;STAT1;UBD;LCP2;BRCA1;FYB
Molluscum contagiosum virus subtype 1 MC013L (gene: MC013L)	8/131	0.00395265	0.0319399	0	0	3.16418	17.5086	PSTPIP1;CD8A;STAT1;UBD;ISG15;BRCA1;HIST1H2AB;HIST2H2AC
Variola virus IEV and EEV membrane glycoprotein (gene: A37R)	8/131	0.00395265	0.0319015	0	0	3.16418	17.5086	KLRK1;CD72;ITGA4;CD8A;KLRC3;STAT1;KLRC1;CLEC4E
Chapare mammarenavirus Z protein	3/17	0.00396669	0.0319764	0	0	9.14355	50.5622	STAT1;BRCA1;TK1
Cowpox virus CPXV018 protein (gene: CPXV018 CDS)	3/17	0.00396669	0.031938	0	0	9.14355	50.5622	KLRK1;STAT1;BRCA1
Coxsackievirus A1 3C	3/17	0.00396669	0.0318998	0	0	9.14355	50.5622	STAT1;CD8A;BRCA1
Duvenhage lyssavirus glycoprotein (gene: G)	3/17	0.00396669	0.0318616	0	0	9.14355	50.5622	ITGA4;STAT1;BRCA1
Hepatovirus A 1C VP3 mature peptide	3/17	0.00396669	0.0318236	0	0	9.14355	50.5622	ITGA4;STAT1;CD8A
Human adenovirus 1 E4 ORF3	3/17	0.00396669	0.0317856	0	0	9.14355	50.5622	STAT1;CD8A;UBD
Human adenovirus 11+34 penton protein (gene: L2)	3/17	0.00396669	0.0317477	0	0	9.14355	50.5622	ITGA4;STAT1;BRCA1
Human adenovirus 16 19.3 kDa MHC class I antigen-binding glycoprotein precursor (gene: E3)	3/17	0.00396669	0.0317099	0	0	9.14355	50.5622	ITGA4;STAT1;CD8A
Human adenovirus 2 E4 ORF3	3/17	0.00396669	0.0316722	0	0	9.14355	50.5622	STAT1;CD8A;UBD
Human adenovirus 3+7 19.3 kDa MHC class I antigen-binding glycoprotein precursor (gene: E3)	3/17	0.00396669	0.0316346	0	0	9.14355	50.5622	ITGA4;STAT1;CD8A
Human adenovirus 5 E4 ORF3	3/17	0.00396669	0.0315971	0	0	9.14355	50.5622	STAT1;CD8A;UBD
Human adenovirus 6 nuclear binding protein (gene: E4)	3/17	0.00396669	0.0315596	0	0	9.14355	50.5622	STAT1;CD8A;UBD
Human astrovirus 6 capsid protein	3/17	0.00396669	0.0315223	0	0	9.14355	50.5622	ITGA4;STAT1;BRCA1
Human betaherpesvirus 5 major capsid protein (gene: UL86)	3/17	0.00396669	0.031485	0	0	9.14355	50.5622	ITGA4;STAT1;BRCA1
Human bocavirus 3 VP1	3/17	0.00396669	0.0314478	0	0	9.14355	50.5622	STAT1;CD8A;BRCA1
Human bocavirus 3 NS1	3/17	0.00396669	0.0314108	0	0	9.14355	50.5622	ITGA4;STAT1;BRCA1
Human coronavirus HKU1 nsp4 (TM2) (gene: orf1ab)	3/17	0.00396669	0.0313738	0	0	9.14355	50.5622	ITGA4;STAT1;BRCA1
Human enterovirus C117 2C	3/17	0.00396669	0.0313369	0	0	9.14355	50.5622	STAT1;BRCA1;TK1
Human enterovirus C118 3C	3/17	0.00396669	0.0313	0	0	9.14355	50.5622	STAT1;CD8A;BRCA1
Human mastadenovirus C control protein E4orf3 (gene: E4)	3/17	0.00396669	0.0312633	0	0	9.14355	50.5622	STAT1;CD8A;UBD
Human rhinovirus A18 2C	3/17	0.00396669	0.0312266	0	0	9.14355	50.5622	STAT1;BRCA1;TK1
Human rhinovirus A54 2C	3/17	0.00396669	0.0311901	0	0	9.14355	50.5622	STAT1;BRCA1;TK1
Human rhinovirus A56 2C	3/17	0.00396669	0.0311536	0	0	9.14355	50.5622	STAT1;BRCA1;TK1
Human rhinovirus B79 2C	3/17	0.00396669	0.0311172	0	0	9.14355	50.5622	STAT1;BRCA1;TK1
Igbo Ora virus envelope glycoprotein	3/17	0.00396669	0.0310809	0	0	9.14355	50.5622	ITGA4;STAT1;BRCA1
Influenza A virus (A/Puerto Rico/8/1934(H1N1)) polymerase PB2 (gene: PB2)	3/17	0.00396669	0.0310447	0	0	9.14355	50.5622	ITGA4;STAT1;BRCA1
Middle East respiratory syndrome-related coronavirus nsp4 protein (gene: orf1ab)	3/17	0.00396669	0.0310085	0	0	9.14355	50.5622	STAT1;ISG15;BRCA1
Norovirus Hu/GII.4/NIHIC17.1/2012/USA NTPase (gene: POL)	3/17	0.00396669	0.0309725	0	0	9.14355	50.5622	STAT1;BRCA1;TK1
Norovirus Hu/Norwalk/10173/2009/VNM NTPase (gene: POL)	3/17	0.00396669	0.0309365	0	0	9.14355	50.5622	STAT1;BRCA1;TK1
Norovirus Hu/Norwalk/10179/2009/VNM NTPase (gene: POL)	3/17	0.00396669	0.0309006	0	0	9.14355	50.5622	STAT1;BRCA1;TK1
Norovirus Hu/Norwalk/10182/2009/VNM NTPase (gene: POL)	3/17	0.00396669	0.0308648	0	0	9.14355	50.5622	STAT1;BRCA1;TK1
Norovirus Hu/Norwalk/10247/2009/VNM NTPase (gene: POL)	3/17	0.00396669	0.0308291	0	0	9.14355	50.5622	STAT1;BRCA1;TK1
Papiine alphaherpesvirus 2 tegument protein UL21 (gene: UL21)	3/17	0.00396669	0.0307934	0	0	9.14355	50.5622	ITGA4;STAT1;BRCA1
Salivirus NG-J1 VP1	3/17	0.00396669	0.0307579	0	0	9.14355	50.5622	STAT1;CD8A;BRCA1
Alkhumra hemorrhagic fever virus PreM protein	4/34	0.00400916	0.0310514	0	0	6.0957	33.6432	ITGA4;STAT1;CD8A;UBD
Echovirus E17 2C	4/34	0.00400916	0.0310156	0	0	6.0957	33.6432	STAT1;UBD;BRCA1;TK1
Human adenovirus Chiba_E086/2012 gp19K (gene: E3)	4/34	0.00400916	0.0309799	0	0	6.0957	33.6432	ITGA4;STAT1;CD8A;BRCA1
Human alphaherpesvirus 1 envelope glycoprotein E (gene: US8)	4/34	0.00400916	0.0309443	0	0	6.0957	33.6432	ITGA4;STAT1;CD8A;BRCA1
Human papillomavirus 139 replication protein (gene: E1)	4/34	0.00400916	0.0309088	0	0	6.0957	33.6432	STAT1;CD8A;BRCA1;TK1
Human papillomavirus type 101 E7 protein	4/34	0.00400916	0.0308733	0	0	6.0957	33.6432	ITGA4;CD8A;UBD;BRCA1
Human rhinovirus A44 1D (VP1)	4/34	0.00400916	0.030838	0	0	6.0957	33.6432	STAT1;CD8A;UBD;BRCA1
Human rhinovirus B4 1D (VP1)	4/34	0.00400916	0.0308027	0	0	6.0957	33.6432	STAT1;CD8A;BRCA1;ICOS
Norovirus GIV p48	4/34	0.00400916	0.0307675	0	0	6.0957	33.6432	ITGA4;STAT1;CD8A;BRCA1
Norovirus Hu/GII.4/NIHIC28.4/2012/USA protein p48 (gene: POL)	4/34	0.00400916	0.0307324	0	0	6.0957	33.6432	ITGA4;STAT1;CD8A;BRCA1
Norovirus Hu/GII/10002/2009/VNM capsid protein VP1 (gene: VP1)	4/34	0.00400916	0.0306973	0	0	6.0957	33.6432	ITGA4;STAT1;CD8A;BRCA1
Rhinovirus B 2C	4/34	0.00400916	0.0306623	0	0	6.0957	33.6432	STAT1;FIGNL1;BRCA1;TK1
Salivirus NG-J1 2C	4/34	0.00400916	0.0306275	0	0	6.0957	33.6432	STAT1;FIGNL1;BRCA1;TK1
Sapovirus Mc10 excised_polyprotein 1..1720	4/34	0.00400916	0.0305927	0	0	6.0957	33.6432	ITGA4;STAT1;BRCA1;TK1
Enterovirus H 3D	5/55	0.00411496	0.0313643	0	0	4.71032	25.8744	CD8A;UBD;BRCA1;HIST2H2AC;HIST1H2AB
Human adenovirus 46 IVa2	5/55	0.00411496	0.0313288	0	0	4.71032	25.8744	STAT1;UBD;TAP1;BRCA1;TK1
Human adenovirus 7 IVa2	5/55	0.00411496	0.0312933	0	0	4.71032	25.8744	STAT1;UBD;TAP1;BRCA1;TK1
Human papillomavirus 145 regulatory protein (gene: E2)	5/55	0.00411496	0.0312579	0	0	4.71032	25.8744	ITGA4;CD8A;STAT1;UBD;BRCA1
Human papillomavirus 99 E2 protein (gene: E2)	5/55	0.00411496	0.0312226	0	0	4.71032	25.8744	ITGA4;CD8A;STAT1;UBD;BRCA1
Molluscum contagiosum virus subtype 1 MC157R (gene: MC157R)	5/55	0.00411496	0.0311873	0	0	4.71032	25.8744	ITGA4;CD8A;STAT1;UBD;BRCA1
Monkeypox virus DNA polymerase	5/55	0.00411496	0.0311522	0	0	4.71032	25.8744	ITGA4;CD8A;STAT1;UBD;BRCA1
Norovirus Hu/GII-4/CGMH02/2006/TW major viral capsid protein (gene: VP1)	5/55	0.00411496	0.0311171	0	0	4.71032	25.8744	ITGA4;CD8A;STAT1;UBD;BRCA1
Norovirus Hu/GII-4/CGMH03/2006/TW major viral capsid protein (gene: VP1)	5/55	0.00411496	0.0310821	0	0	4.71032	25.8744	ITGA4;CD8A;STAT1;UBD;BRCA1
Norovirus Hu/GII-4/CGMH04/2006/TW major viral capsid protein (gene: VP1)	5/55	0.00411496	0.0310472	0	0	4.71032	25.8744	ITGA4;CD8A;STAT1;UBD;BRCA1
Norovirus Hu/GII-4/CGMH06/2006/TW major viral capsid protein	5/55	0.00411496	0.0310123	0	0	4.71032	25.8744	ITGA4;CD8A;STAT1;UBD;BRCA1
Norovirus Hu/GII-4/CGMH07/2006/TW major viral capsid protein (gene: VP1)	5/55	0.00411496	0.0309775	0	0	4.71032	25.8744	ITGA4;CD8A;STAT1;UBD;BRCA1
Norovirus Hu/GII-4/CGMH09/2006/TW major viral capsid protein (gene: VP1)	5/55	0.00411496	0.0309429	0	0	4.71032	25.8744	ITGA4;CD8A;STAT1;UBD;BRCA1
Norovirus Hu/GII-4/CGMH12/2007/TW major viral capsid protein (gene: VP1)	5/55	0.00411496	0.0309082	0	0	4.71032	25.8744	ITGA4;CD8A;STAT1;UBD;BRCA1
Norovirus Hu/GII-4/CGMH17/2007/TW major viral capsid protein (gene: VP1)	5/55	0.00411496	0.0308737	0	0	4.71032	25.8744	ITGA4;CD8A;STAT1;UBD;BRCA1
Norovirus Hu/GII-4/CGMH21/2010/TW major viral capsid protein (gene: VP1)	5/55	0.00411496	0.0308393	0	0	4.71032	25.8744	ITGA4;CD8A;STAT1;UBD;BRCA1
Norovirus Hu/GII-4/CGMH24/2010/TW major viral capsid protein (gene: VP1)	5/55	0.00411496	0.0308049	0	0	4.71032	25.8744	ITGA4;CD8A;STAT1;UBD;BRCA1
Norovirus Hu/GII-4/CGMH25/2010/TW major viral capsid protein (gene: VP1)	5/55	0.00411496	0.0307706	0	0	4.71032	25.8744	ITGA4;CD8A;STAT1;UBD;BRCA1
Norovirus Hu/GII-4/CGMH27/2010/TW major viral capsid protein (gene: VP1)	5/55	0.00411496	0.0307363	0	0	4.71032	25.8744	ITGA4;CD8A;STAT1;UBD;BRCA1
Norovirus Hu/GII.4/Caringbah/NSW409G/2011/AU VP1	5/55	0.00411496	0.0307022	0	0	4.71032	25.8744	ITGA4;CD8A;STAT1;UBD;BRCA1
Norovirus Hu/GII.4/HS292/2012/USA capsid protein VP1 (gene: VP1)	5/55	0.00411496	0.0306681	0	0	4.71032	25.8744	ITGA4;CD8A;STAT1;UBD;BRCA1
Norovirus Hu/GII.4/NIHIC1.13/2012/USA protein p48 (gene: POL)	5/55	0.00411496	0.0306341	0	0	4.71032	25.8744	ITGA4;CD8A;STAT1;BRCA1;SLA2
Norovirus Hu/GII.4/NIHIC1.16/2012/USA protein p48 (gene: POL)	5/55	0.00411496	0.0306002	0	0	4.71032	25.8744	ITGA4;CD8A;STAT1;BRCA1;SLA2
Norovirus Hu/GII.4/NIHIC13/2011/USA capsid protein VP1 (gene: VP1)	5/55	0.00411496	0.0305663	0	0	4.71032	25.8744	ITGA4;CD8A;STAT1;UBD;BRCA1
Norovirus Hu/GII.4/NIHIC18.1/2012/USA capsid protein VP1 (gene: VP1)	5/55	0.00411496	0.0305326	0	0	4.71032	25.8744	ITGA4;CD8A;STAT1;UBD;BRCA1
Norovirus Hu/GII.4/NIHIC27.1/2012/USA capsid protein VP1 (gene: VP1)	5/55	0.00411496	0.0304989	0	0	4.71032	25.8744	ITGA4;CD8A;STAT1;UBD;BRCA1
Norovirus Hu/GII.4/NIHIC28.4/2012/USA capsid protein VP1 (gene: VP1)	5/55	0.00411496	0.0304652	0	0	4.71032	25.8744	ITGA4;CD8A;STAT1;UBD;BRCA1
Norovirus Hu/GII.4/New Orleans/2010/USA VP1	5/55	0.00411496	0.0304317	0	0	4.71032	25.8744	ITGA4;CD8A;STAT1;UBD;BRCA1
Norovirus Hu/GII.4/SGU-110421/KOR/2011 VP1	5/55	0.00411496	0.0303982	0	0	4.71032	25.8744	ITGA4;CD8A;STAT1;UBD;BRCA1
Norovirus Hu/GII.4/Sydney/NSW0514/2012/AU VP1	5/55	0.00411496	0.0303648	0	0	4.71032	25.8744	ITGA4;CD8A;STAT1;UBD;BRCA1
Norovirus Hu/GII/20469/2010/VNM capsid protein VP1 (gene: VP1)	5/55	0.00411496	0.0303315	0	0	4.71032	25.8744	ITGA4;CD8A;STAT1;UBD;BRCA1
Norovirus Hu/GII/BG1C0241-33/2011/BGD capsid protein VP1 (gene: VP1)	5/55	0.00411496	0.0302982	0	0	4.71032	25.8744	ITGA4;CD8A;STAT1;UBD;BRCA1
Norovirus Hu/GII/Seoul1282/KOR/2010 major capsid protein	5/55	0.00411496	0.030265	0	0	4.71032	25.8744	ITGA4;CD8A;STAT1;UBD;BRCA1
Norovirus Hu/GII/Seoul1488/KOR/2011 major capsid protein	5/55	0.00411496	0.0302319	0	0	4.71032	25.8744	ITGA4;CD8A;STAT1;UBD;BRCA1
Norovirus Hu/Norwalk/10325/2010/VNM capsid protein VP1 (gene: VP1)	5/55	0.00411496	0.0301989	0	0	4.71032	25.8744	ITGA4;CD8A;STAT1;UBD;BRCA1
Norovirus Hu/Norwalk/10386/2010/VNM capsid protein VP1 (gene: VP1)	5/55	0.00411496	0.0301659	0	0	4.71032	25.8744	ITGA4;CD8A;STAT1;UBD;BRCA1
Vaccinia virus CD47-like putative membrane protein (gene: A38L)	5/55	0.00411496	0.030133	0	0	4.71032	25.8744	ITGA4;CD8A;STAT1;UBD;BRCA1
Monkeypox virus Zaire-96-I-16 IEV and EEV membrane glycoprotein (gene: A36R)	8/132	0.0041388	0.0302745	0	0	3.14021	17.2314	CXCL9;KLRK1;CD72;KLRC3;STAT1;KLRC1;CLEC4E;CXCL5
Ectromelia virus ERPV DNA polymerase	5/56	0.00444829	0.032503	0	0	4.6262	25.052	ITGA4;CD8A;STAT1;UBD;BRCA1
Human adenovirus 31 IVa2 protein (gene: IVa2)	5/56	0.00444829	0.0324677	0	0	4.6262	25.052	STAT1;UBD;TAP1;BRCA1;TK1
Human papillomavirus 105 E2 protein (gene: E2)	5/56	0.00444829	0.0324324	0	0	4.6262	25.052	ITGA4;CD8A;STAT1;UBD;BRCA1
Human papillomavirus 17 early protein (gene: E2)	5/56	0.00444829	0.0323973	0	0	4.6262	25.052	ITGA4;CD8A;STAT1;UBD;BRCA1
Human papillomavirus type 14D early protein (gene: E2)	5/56	0.00444829	0.0323622	0	0	4.6262	25.052	ITGA4;CD8A;STAT1;UBD;BRCA1
Norovirus GII/Hu/JP/2002/GII.P5_GII.5/Saitama/T52 VP1 (gene: VP1)	5/56	0.00444829	0.0323271	0	0	4.6262	25.052	ITGA4;CD8A;STAT1;BRCA1;ICOS
Norovirus GII/Hu/JP/2012/GII.Pe_GII.4_Sydney2012/Fukuyama/1 VP1 (gene: VP1)	5/56	0.00444829	0.0322922	0	0	4.6262	25.052	ITGA4;CD8A;STAT1;UBD;BRCA1
Norovirus GII/Hu/JP/2012/GII.Pe_GII.4_Sydney2012/Fukuyama/2 VP1 (gene: VP1)	5/56	0.00444829	0.0322573	0	0	4.6262	25.052	ITGA4;CD8A;STAT1;UBD;BRCA1
Norovirus GII/Hu/JP/2012/GII.Pe_GII.4_Sydney2012/Fukuyama/3 VP1 (gene: VP1)	5/56	0.00444829	0.0322225	0	0	4.6262	25.052	ITGA4;CD8A;STAT1;UBD;BRCA1
Norovirus GII/Hu/JP/2012/GII.Pe_GII.4_Sydney2012/Fukuyama/5 VP1 (gene: VP1)	5/56	0.00444829	0.0321878	0	0	4.6262	25.052	ITGA4;CD8A;STAT1;UBD;BRCA1
Norovirus Hu/GII-4/CGMH05/2006/TW major viral capsid protein (gene: VP1)	5/56	0.00444829	0.0321531	0	0	4.6262	25.052	ITGA4;CD8A;STAT1;UBD;BRCA1
Norovirus Hu/GII-4/CGMH08/2006/TW major viral capsid protein (gene: VP1)	5/56	0.00444829	0.0321186	0	0	4.6262	25.052	ITGA4;CD8A;STAT1;UBD;BRCA1
Norovirus Hu/GII-4/CGMH16/2007/TW major viral capsid protein (gene: VP1)	5/56	0.00444829	0.0320841	0	0	4.6262	25.052	ITGA4;CD8A;STAT1;UBD;BRCA1
Norovirus Hu/GII.4/Doonside/NSW536I/2011/AU VP1	5/56	0.00444829	0.0320496	0	0	4.6262	25.052	ITGA4;CD8A;STAT1;UBD;BRCA1
Norovirus Hu/GII.4/GZ2010-L26/Guangzhou/CHN/2010 major viral capsid protein (gene: VP1)	5/56	0.00444829	0.0320153	0	0	4.6262	25.052	ITGA4;CD8A;STAT1;UBD;BRCA1
Norovirus Hu/GII.4/Hong Kong/CUHK3630/2012/CHN VP1	5/56	0.00444829	0.031981	0	0	4.6262	25.052	ITGA4;CD8A;STAT1;UBD;BRCA1
Norovirus Hu/GII.4/Jiangsu1/2011/CHN major capsid protein	5/56	0.00444829	0.0319468	0	0	4.6262	25.052	ITGA4;CD8A;STAT1;UBD;BRCA1
Norovirus Hu/GII.4/NIHIC2.2/2010/USA capsid protein VP1 (gene: VP1)	5/56	0.00444829	0.0319127	0	0	4.6262	25.052	ITGA4;CD8A;STAT1;UBD;BRCA1
Norovirus Hu/GII.4/NIHIC2.3/2010/USA capsid protein VP1 (gene: VP1)	5/56	0.00444829	0.0318786	0	0	4.6262	25.052	ITGA4;CD8A;STAT1;UBD;BRCA1
Norovirus Hu/GII.4/NIHIC27.2/2012/USA capsid protein VP1 (gene: VP1)	5/56	0.00444829	0.0318446	0	0	4.6262	25.052	ITGA4;CD8A;STAT1;UBD;BRCA1
Norovirus Hu/GII/Shanghai/SH2/2008/CHN VP1	5/56	0.00444829	0.0318107	0	0	4.6262	25.052	ITGA4;CD8A;STAT1;UBD;BRCA1
Norovirus Hu/Norwalk/10285/2010/VNM capsid protein VP1 (gene: VP1)	5/56	0.00444829	0.0317769	0	0	4.6262	25.052	ITGA4;CD8A;STAT1;UBD;BRCA1
Norovirus Hu/Norwalk/10313/2010/VNM capsid protein VP1 (gene: VP1)	5/56	0.00444829	0.0317431	0	0	4.6262	25.052	ITGA4;CD8A;STAT1;UBD;BRCA1
Norovirus Hu/Norwalk/10378/2010/VNM capsid protein VP1 (gene: VP1)	5/56	0.00444829	0.0317094	0	0	4.6262	25.052	ITGA4;CD8A;STAT1;UBD;BRCA1
Norovirus Hu/Shanghai/SH5/2009/CHN VP1	5/56	0.00444829	0.0316758	0	0	4.6262	25.052	ITGA4;CD8A;STAT1;UBD;BRCA1
Adeno-associated virus - 6 capsid protein VP1	4/35	0.00445863	0.0317158	0	0	5.92154	32.0528	ITGA4;STAT1;CD8A;THY1
Eastern equine encephalitis virus excised_polyprotein 1..743	4/35	0.00445863	0.0316822	0	0	5.92154	32.0528	ITGA4;STAT1;CD8A;BRCA1
Human adenovirus 1 E4 ORF1	4/35	0.00445863	0.0316487	0	0	5.92154	32.0528	ITGA4;STAT1;CD8A;BRCA1
Human adenovirus 2 E4 ORF1	4/35	0.00445863	0.0316153	0	0	5.92154	32.0528	ITGA4;STAT1;CD8A;BRCA1
Human adenovirus 5 E4 ORF1	4/35	0.00445863	0.0315819	0	0	5.92154	32.0528	ITGA4;STAT1;CD8A;BRCA1
Human adenovirus 6 E4ORF1 (gene: E4)	4/35	0.00445863	0.0315487	0	0	5.92154	32.0528	ITGA4;STAT1;CD8A;BRCA1
Human adenovirus 65 E3 gp19K	4/35	0.00445863	0.0315154	0	0	5.92154	32.0528	ITGA4;STAT1;CD8A;BRCA1
Human adenovirus 67 E3 gp19K	4/35	0.00445863	0.0314823	0	0	5.92154	32.0528	ITGA4;STAT1;CD8A;BRCA1
Human cosavirus B 3C	4/35	0.00445863	0.0314492	0	0	5.92154	32.0528	STAT1;FIGNL1;BRCA1;TK1
Human mastadenovirus C control protein E4orf1 (gene: E4)	4/35	0.00445863	0.0314162	0	0	5.92154	32.0528	ITGA4;STAT1;CD8A;BRCA1
Human papillomavirus 98 E2 protein (gene: E2)	4/35	0.00445863	0.0313833	0	0	5.92154	32.0528	ITGA4;STAT1;CD8A;BRCA1
Human rhinovirus A10 1D	4/35	0.00445863	0.0313504	0	0	5.92154	32.0528	ITGA4;STAT1;CD8A;BRCA1
Human rhinovirus A30 2C	4/35	0.00445863	0.0313177	0	0	5.92154	32.0528	STAT1;UBD;BRCA1;TK1
Human rhinovirus A38 2C	4/35	0.00445863	0.0312849	0	0	5.92154	32.0528	STAT1;FIGNL1;BRCA1;TK1
Human rhinovirus B26 1D	4/35	0.00445863	0.0312523	0	0	5.92154	32.0528	STAT1;CD8A;BRCA1;ICOS
Middle East respiratory syndrome-related coronavirus nsp15 protein (gene: orf1ab)	4/35	0.00445863	0.0312197	0	0	5.92154	32.0528	STAT1;CD8A;ISG15;BRCA1
Norovirus Hu/GII.12/CGMH39/2010/TW VP1	4/35	0.00445863	0.0311872	0	0	5.92154	32.0528	ITGA4;STAT1;CD8A;BRCA1
Norovirus Hu/GII.12/CGMH40/2010/TW VP1	4/35	0.00445863	0.0311547	0	0	5.92154	32.0528	ITGA4;STAT1;CD8A;BRCA1
Norovirus Hu/GII.12/CGMH41/2010/TW VP1	4/35	0.00445863	0.0311223	0	0	5.92154	32.0528	ITGA4;STAT1;CD8A;BRCA1
Norovirus Hu/GII.12/CGMH42/2010/TW VP1	4/35	0.00445863	0.03109	0	0	5.92154	32.0528	ITGA4;STAT1;CD8A;BRCA1
Norovirus Hu/GII.12/HS210/2010/USA capsid protein VP1	4/35	0.00445863	0.0310578	0	0	5.92154	32.0528	ITGA4;STAT1;CD8A;BRCA1
Norovirus Hu/GII.2/HS255/2011/USA capsid protein VP1 (gene: VP1)	4/35	0.00445863	0.0310256	0	0	5.92154	32.0528	ITGA4;STAT1;CD8A;BRCA1
Norovirus Hu/GII.4/Randwick/NSW938K/2011/AU VP1	4/35	0.00445863	0.0309935	0	0	5.92154	32.0528	ITGA4;STAT1;CD8A;BRCA1
Norovirus Hu/GII.g-GII.12/Gunnedah/NSW895P/2010/AU VP1	4/35	0.00445863	0.0309614	0	0	5.92154	32.0528	ITGA4;STAT1;CD8A;BRCA1
Norovirus Hu/GII.g-GII.12/Wahroonga/NSW004P/2009/AU VP1	4/35	0.00445863	0.0309294	0	0	5.92154	32.0528	ITGA4;STAT1;CD8A;BRCA1
Rhinovirus B48 1D (VP1)	4/35	0.00445863	0.0308975	0	0	5.92154	32.0528	STAT1;CD8A;BRCA1;ICOS
Human betacoronavirus 2c Jordan-N3/2012 ORF1ab protein (gene: ORF1ab)	6/80	0.00449889	0.0311444	0	0	3.88601	20.9997	ITGA4;CD8A;STAT1;UBD;ISG15;BRCA1
Human mastadenovirus F encapsidation protein IVa2 (gene: IVa2)	6/80	0.00449889	0.0311123	0	0	3.88601	20.9997	CD8A;STAT1;UBD;TAP1;BRCA1;TK1
Orf virus ORF071 NPH-PPH downregulator	6/80	0.00449889	0.0310803	0	0	3.88601	20.9997	ITGA4;CD8A;STAT1;UBD;ISG15;BRCA1
Monkeypox virus EEV glycoprotein	8/134	0.00453129	0.031272	0	0	3.09334	16.694	CXCL9;KLRK1;CD72;ITGA4;KLRC3;STAT1;KLRC1;CLEC4E
Astrovirus MLB1 ORF1a	3/18	0.00469257	0.0323517	0	0	8.63558	46.302	ITGA4;STAT1;BRCA1
Cercopithecine alphaherpesvirus 2 envelope glycoprotein L (gene: UL1)	3/18	0.00469257	0.0323186	0	0	8.63558	46.302	STAT1;UBD;BRCA1
Cercopithecine betaherpesvirus 5 chemokine vCXCL6 (gene: UL146C)	3/18	0.00469257	0.0322855	0	0	8.63558	46.302	STAT1;CD8A;BRCA1
Cowpox virus CPXV065 (gene: CPXV065 CDS)	3/18	0.00469257	0.0322524	0	0	8.63558	46.302	ITGA4;STAT1;BRCA1
Coxsackievirus A12 2C protein	3/18	0.00469257	0.0322194	0	0	8.63558	46.302	STAT1;BRCA1;TK1
Coxsackievirus A18 2A protein	3/18	0.00469257	0.0321865	0	0	8.63558	46.302	STAT1;CD8A;BRCA1
Coxsackievirus A22 3c	3/18	0.00469257	0.0321537	0	0	8.63558	46.302	STAT1;CD8A;BRCA1
Coxsackievirus A6 2C protein	3/18	0.00469257	0.0321209	0	0	8.63558	46.302	STAT1;BRCA1;TK1
Cyclovirus TN25 capsid protein (gene: cap)	3/18	0.00469257	0.0320882	0	0	8.63558	46.302	STAT1;UBD;BRCA1
Hantaan virus envelope glycoprotein G2 (see comment)	3/18	0.00469257	0.0320555	0	0	8.63558	46.302	ITGA4;STAT1;BRCA1
Horsepox virus HSPV082 (Glutaredoxin-like protein; Provisional)	3/18	0.00469257	0.032023	0	0	8.63558	46.302	STAT1;UBD;BRCA1
Human bocavirus VP1 (gene: VP1)	3/18	0.00469257	0.0319905	0	0	8.63558	46.302	STAT1;CD8A;BRCA1
Human bocavirus 2 NS1	3/18	0.00469257	0.031958	0	0	8.63558	46.302	ITGA4;STAT1;BRCA1
Human bocavirus 4 NI non structural protein NS1 (gene: NS1)	3/18	0.00469257	0.0319256	0	0	8.63558	46.302	ITGA4;STAT1;BRCA1
Human bocavirus WLL-3 VP1 (gene: VP1)	3/18	0.00469257	0.0318933	0	0	8.63558	46.302	STAT1;CD8A;BRCA1
Human bocavirus isolate SH1 VP2	3/18	0.00469257	0.0318611	0	0	8.63558	46.302	STAT1;CD8A;BRCA1
Human bocavirus isolate SH3 NS1	3/18	0.00469257	0.0318289	0	0	8.63558	46.302	ITGA4;STAT1;BRCA1
Human bocavirus isolate SH3 VP1	3/18	0.00469257	0.0317968	0	0	8.63558	46.302	STAT1;CD8A;BRCA1
Human coronavirus HKU1 nsp5 (gene: orf1ab)	3/18	0.00469257	0.0317647	0	0	8.63558	46.302	ITGA4;STAT1;BRCA1
Human papillomavirus 126 hypothetical protein (gene: HpV126gp3)	3/18	0.00469257	0.0317327	0	0	8.63558	46.302	STAT1;BRCA1;TK1
Human papillomavirus type 106 E1 protein	3/18	0.00469257	0.0317008	0	0	8.63558	46.302	STAT1;BRCA1;TK1
Human parechovirus 8 VP1	3/18	0.00469257	0.0316689	0	0	8.63558	46.302	STAT1;CD8A;BRCA1
Human pegivirus 2 putative NS5A peptide	3/18	0.00469257	0.0316372	0	0	8.63558	46.302	ITGA4;STAT1;BRCA1
Human rhinovirus A19 2C	3/18	0.00469257	0.0316054	0	0	8.63558	46.302	STAT1;BRCA1;TK1
Human rhinovirus A50 2C	3/18	0.00469257	0.0315737	0	0	8.63558	46.302	STAT1;BRCA1;TK1
Human rhinovirus A51 2C	3/18	0.00469257	0.0315421	0	0	8.63558	46.302	STAT1;BRCA1;TK1
Human rhinovirus A61 2C	3/18	0.00469257	0.0315106	0	0	8.63558	46.302	STAT1;BRCA1;TK1
Human rhinovirus A77 2C	3/18	0.00469257	0.0314791	0	0	8.63558	46.302	STAT1;BRCA1;TK1
Human rhinovirus B99 2C	3/18	0.00469257	0.0314477	0	0	8.63558	46.302	STAT1;BRCA1;TK1
Measles virus strain MVi/Virginia.USA/15.09 hemagglutinin protein (gene: H)	3/18	0.00469257	0.0314164	0	0	8.63558	46.302	CD96;SLAMF8;CD48
Molluscum contagiosum virus subtype 1 MC026L (gene: MC026L)	3/18	0.00469257	0.0313851	0	0	8.63558	46.302	STAT1;UBD;BRCA1
Norovirus GIV VP1	3/18	0.00469257	0.0313538	0	0	8.63558	46.302	ITGA4;STAT1;BRCA1
Norovirus Hu/GIV.1/LakeMacquarie/NSW268O/2010/AU VP1	3/18	0.00469257	0.0313227	0	0	8.63558	46.302	ITGA4;STAT1;BRCA1
Orf virus ORF043 hypothetical protein	3/18	0.00469257	0.0312916	0	0	8.63558	46.302	STAT1;CD8A;BRCA1
Orf virus ORF099 Holliday junction resolvase	3/18	0.00469257	0.0312605	0	0	8.63558	46.302	STAT1;CD8A;BRCA1
Respiratory syncytial virus type A L polymerase (gene: L)	3/18	0.00469257	0.0312295	0	0	8.63558	46.302	ITGA4;STAT1;BRCA1
Variola virus hypothetical protein (gene: L2R)	3/18	0.00469257	0.0311986	0	0	8.63558	46.302	STAT1;BRCA1;TK1
Variola virus hypothetical protein (gene: C20L)	3/18	0.00469257	0.0311678	0	0	8.63558	46.302	ITGA4;STAT1;BRCA1
Yaba-like disease virus 67R protein (gene: 67R)	3/18	0.00469257	0.031137	0	0	8.63558	46.302	STAT1;CD8A;BRCA1
Betacoronavirus England 1 ORF1b protein (gene: orf1ab)	6/81	0.00478167	0.0316969	0	0	3.83803	20.5065	ITGA4;CD8A;STAT1;UBD;ISG15;BRCA1
Human adenovirus 21a maturation protein IVa2 (gene: IVa2)	5/57	0.0048004	0.0317896	0	0	4.54504	24.2662	STAT1;UBD;TAP1;BRCA1;TK1
Human papillomavirus type 13 E2 (gene: E2)	5/57	0.0048004	0.0317583	0	0	4.54504	24.2662	ITGA4;CD8A;STAT1;UBD;BRCA1
Norovirus Hu/GII-4/CGMH11/2006/TW major viral capsid protein	5/57	0.0048004	0.0317271	0	0	4.54504	24.2662	ITGA4;CD8A;STAT1;UBD;BRCA1
Norovirus Hu/GII-4/CGMH14/2007/TW major viral capsid protein (gene: VP1)	5/57	0.0048004	0.0316959	0	0	4.54504	24.2662	ITGA4;CD8A;STAT1;UBD;BRCA1
Norovirus Hu/GII-4/CGMH15/2007/TW major viral capsid protein	5/57	0.0048004	0.0316647	0	0	4.54504	24.2662	ITGA4;CD8A;STAT1;UBD;BRCA1
Norovirus Hu/GII.4/20199/2009/VNM capsid protein VP1 (gene: VP1)	5/57	0.0048004	0.0316337	0	0	4.54504	24.2662	ITGA4;CD8A;STAT1;UBD;BRCA1
Norovirus Hu/GII.4/HS288/2012/USA capsid protein VP1 (gene: VP1)	5/57	0.0048004	0.0316026	0	0	4.54504	24.2662	ITGA4;CD8A;STAT1;UBD;BRCA1
Norovirus Hu/GII.4/Hong Kong/CUHK6080/2012/CHN VP1	5/57	0.0048004	0.0315717	0	0	4.54504	24.2662	ITGA4;CD8A;STAT1;UBD;BRCA1
Norovirus Hu/GII.4/NIHIC17.1/2012/USA capsid protein VP1 (gene: VP1)	5/57	0.0048004	0.0315408	0	0	4.54504	24.2662	ITGA4;CD8A;STAT1;UBD;BRCA1
Norovirus Hu/GII.4/NIHIC17.5/2012/USA capsid protein VP1 (gene: VP1)	5/57	0.0048004	0.03151	0	0	4.54504	24.2662	ITGA4;CD8A;STAT1;UBD;BRCA1
Norovirus Hu/GII.4/NIHIC17.6/2012/USA capsid protein VP1 (gene: VP1)	5/57	0.0048004	0.0314792	0	0	4.54504	24.2662	ITGA4;CD8A;STAT1;UBD;BRCA1
Norovirus Hu/GII.4/NIHIC17.8/2013/USA capsid protein VP1 (gene: VP1)	5/57	0.0048004	0.0314485	0	0	4.54504	24.2662	ITGA4;CD8A;STAT1;UBD;BRCA1
Norovirus Hu/GII.4/NIHIC17.9/2013/USA capsid protein VP1 (gene: VP1)	5/57	0.0048004	0.0314178	0	0	4.54504	24.2662	ITGA4;CD8A;STAT1;UBD;BRCA1
Norovirus Hu/GII.4/NIHIC28.5/2012/USA capsid protein VP1 (gene: VP1)	5/57	0.0048004	0.0313872	0	0	4.54504	24.2662	ITGA4;CD8A;STAT1;UBD;BRCA1
Norovirus Hu/GII.4/NIHIC35/2013/USA capsid protein VP1 (gene: VP1)	5/57	0.0048004	0.0313567	0	0	4.54504	24.2662	ITGA4;CD8A;STAT1;UBD;BRCA1
Norovirus Hu/GII.4/Ohio/684/USA VP1	5/57	0.0048004	0.0313262	0	0	4.54504	24.2662	ITGA4;CD8A;STAT1;UBD;BRCA1
Norovirus Hu/GII.4/Rockdale/NSW006D/2009/AU VP1	5/57	0.0048004	0.0312958	0	0	4.54504	24.2662	ITGA4;CD8A;STAT1;UBD;BRCA1
Norovirus Hu/Norwalk/20123/2009/VNM capsid protein VP1 (gene: VP1)	5/57	0.0048004	0.0312655	0	0	4.54504	24.2662	ITGA4;CD8A;STAT1;UBD;BRCA1
Cercopithecine betaherpesvirus 5 protein UL83B (gene: UL83B)	4/36	0.00494082	0.0321488	0	0	5.75705	30.5712	ITGA4;STAT1;CD8A;BRCA1
Cyclovirus PK5006 replication-association protein (gene: rep)	4/36	0.00494082	0.0321177	0	0	5.75705	30.5712	STAT1;UBD;MCM5;BRCA1
Echovirus E15 2C	4/36	0.00494082	0.0320867	0	0	5.75705	30.5712	STAT1;FIGNL1;BRCA1;TK1
Echovirus E20 VP3	4/36	0.00494082	0.0320556	0	0	5.75705	30.5712	ITGA4;STAT1;CD8A;BRCA1
Human betaherpesvirus 7 deoxyuridine triphosphatase (gene: U45)	4/36	0.00494082	0.0320247	0	0	5.75705	30.5712	ITGA4;STAT1;CD8A;BRCA1
Human gammaherpesvirus 4 putative helicase (gene: BBLF4)	4/36	0.00494082	0.0319938	0	0	5.75705	30.5712	STAT1;TAP1;BRCA1;TK1
Human papillomavirus 155 E1	4/36	0.00494082	0.031963	0	0	5.75705	30.5712	STAT1;UBD;BRCA1;TK1
Human papillomavirus type 96 E7	4/36	0.00494082	0.0319322	0	0	5.75705	30.5712	ITGA4;STAT1;UBD;BRCA1
Human rhinovirus A95 1D	4/36	0.00494082	0.0319015	0	0	5.75705	30.5712	ITGA4;STAT1;CD8A;UBD
Human rhinovirus B91 1D	4/36	0.00494082	0.0318709	0	0	5.75705	30.5712	STAT1;CD8A;BRCA1;ICOS
Human rhinovirus B97 2C	4/36	0.00494082	0.0318403	0	0	5.75705	30.5712	STAT1;FIGNL1;BRCA1;TK1
Norovirus Hu/GII.12/HS206/2010/USA VP1	4/36	0.00494082	0.0318098	0	0	5.75705	30.5712	ITGA4;STAT1;CD8A;BRCA1
Norovirus Hu/GII/10003/2009/VNM capsid protein VP1 (gene: VP1)	4/36	0.00494082	0.0317793	0	0	5.75705	30.5712	ITGA4;STAT1;CD8A;BRCA1
Norovirus Hu/GII/10012/2009/VNM capsid protein VP1 (gene: VP1)	4/36	0.00494082	0.0317489	0	0	5.75705	30.5712	ITGA4;STAT1;CD8A;BRCA1
Norovirus Hu/Norwalk/10034/2009/VNM capsid protein VP1 (gene: VP1)	4/36	0.00494082	0.0317185	0	0	5.75705	30.5712	ITGA4;STAT1;CD8A;BRCA1
Norovirus Hu/Norwalk/10054/2009/VNM capsid protein VP1 (gene: VP1)	4/36	0.00494082	0.0316882	0	0	5.75705	30.5712	ITGA4;STAT1;CD8A;BRCA1
Norovirus Hu/Norwalk/10062/2009/VNM NTPase (gene: POL)	4/36	0.00494082	0.031658	0	0	5.75705	30.5712	STAT1;FIGNL1;BRCA1;TK1
Norovirus Hu/Norwalk/10062/2009/VNM capsid protein VP1 (gene: VP1)	4/36	0.00494082	0.0316278	0	0	5.75705	30.5712	ITGA4;STAT1;CD8A;BRCA1
Norovirus Hu/Norwalk/10075/2009/VNM capsid protein VP1 (gene: VP1)	4/36	0.00494082	0.0315977	0	0	5.75705	30.5712	ITGA4;STAT1;CD8A;BRCA1
Norovirus Hu/Norwalk/10078/2009/VNM capsid protein VP1 (gene: VP1)	4/36	0.00494082	0.0315676	0	0	5.75705	30.5712	ITGA4;STAT1;CD8A;BRCA1
Norovirus Hu/Norwalk/10079/2009/VNM capsid protein VP1 (gene: VP1)	4/36	0.00494082	0.0315376	0	0	5.75705	30.5712	ITGA4;STAT1;CD8A;BRCA1
Norovirus Hu/Norwalk/10110/2009/VNM capsid protein VP1 (gene: VP1)	4/36	0.00494082	0.0315077	0	0	5.75705	30.5712	ITGA4;STAT1;CD8A;BRCA1
Norovirus Hu/Norwalk/10114/2009/VNM capsid protein VP1 (gene: VP1)	4/36	0.00494082	0.0314778	0	0	5.75705	30.5712	ITGA4;STAT1;CD8A;BRCA1
Norovirus Hu/Norwalk/10129/2009/VNM capsid protein VP1 (gene: VP1)	4/36	0.00494082	0.031448	0	0	5.75705	30.5712	ITGA4;STAT1;CD8A;BRCA1
Norovirus Hu/Norwalk/10136/2009/VNM capsid protein VP1 (gene: VP1)	4/36	0.00494082	0.0314182	0	0	5.75705	30.5712	ITGA4;STAT1;CD8A;BRCA1
Norovirus Hu/Norwalk/10145/2009/VNM capsid protein VP1 (gene: VP1)	4/36	0.00494082	0.0313885	0	0	5.75705	30.5712	ITGA4;STAT1;CD8A;BRCA1
Norovirus Hu/Norwalk/10158/2009/VNM capsid protein VP1 (gene: VP1)	4/36	0.00494082	0.0313588	0	0	5.75705	30.5712	ITGA4;STAT1;CD8A;BRCA1
Norovirus Hu/Norwalk/10160/2009/VNM capsid protein VP1 (gene: VP1)	4/36	0.00494082	0.0313292	0	0	5.75705	30.5712	ITGA4;STAT1;CD8A;BRCA1
Norovirus Hu/Norwalk/10163/2009/VNM capsid protein VP1 (gene: VP1)	4/36	0.00494082	0.0312996	0	0	5.75705	30.5712	ITGA4;STAT1;CD8A;BRCA1
Norovirus Hu/Norwalk/10169/2009/VNM capsid protein VP1 (gene: VP1)	4/36	0.00494082	0.0312701	0	0	5.75705	30.5712	ITGA4;STAT1;CD8A;BRCA1
Norovirus Hu/Norwalk/10177/2009/VNM capsid protein VP1 (gene: VP1)	4/36	0.00494082	0.0312407	0	0	5.75705	30.5712	ITGA4;STAT1;CD8A;BRCA1
Norovirus Hu/Norwalk/10179/2009/VNM capsid protein VP1 (gene: VP1)	4/36	0.00494082	0.0312113	0	0	5.75705	30.5712	ITGA4;STAT1;CD8A;BRCA1
Norovirus Hu/Norwalk/10182/2009/VNM capsid protein VP1 (gene: VP1)	4/36	0.00494082	0.031182	0	0	5.75705	30.5712	ITGA4;STAT1;CD8A;BRCA1
Norovirus Hu/Norwalk/10194/2009/VNM capsid protein VP1 (gene: VP1)	4/36	0.00494082	0.0311527	0	0	5.75705	30.5712	ITGA4;STAT1;CD8A;BRCA1
Norovirus Hu/Norwalk/10203/2009/VNM capsid protein VP1 (gene: VP1)	4/36	0.00494082	0.0311234	0	0	5.75705	30.5712	ITGA4;STAT1;CD8A;BRCA1
Norovirus Hu/Norwalk/10204/2009/VNM capsid protein VP1 (gene: VP1)	4/36	0.00494082	0.0310943	0	0	5.75705	30.5712	ITGA4;STAT1;CD8A;BRCA1
Norovirus Hu/Norwalk/10222/2009/VNM capsid protein VP1 (gene: VP1)	4/36	0.00494082	0.0310652	0	0	5.75705	30.5712	ITGA4;STAT1;CD8A;BRCA1
Norovirus Hu/Norwalk/10238/2009/VNM capsid protein VP1 (gene: VP1)	4/36	0.00494082	0.0310361	0	0	5.75705	30.5712	ITGA4;STAT1;CD8A;BRCA1
Norovirus Hu/Norwalk/10255/2009/VNM capsid protein VP1 (gene: VP1)	4/36	0.00494082	0.0310071	0	0	5.75705	30.5712	ITGA4;STAT1;CD8A;BRCA1
Norovirus Hu/Norwalk/10296/2010/VNM capsid protein VP1 (gene: VP1)	4/36	0.00494082	0.0309781	0	0	5.75705	30.5712	ITGA4;STAT1;CD8A;BRCA1
Norovirus Hu/Norwalk/20010/2009/VNM capsid protein VP1 (gene: VP1)	4/36	0.00494082	0.0309493	0	0	5.75705	30.5712	ITGA4;STAT1;CD8A;BRCA1
Norovirus Hu/Norwalk/20014/2009/VNM capsid protein VP1 (gene: VP1)	4/36	0.00494082	0.0309204	0	0	5.75705	30.5712	ITGA4;STAT1;CD8A;BRCA1
Norovirus Hu/Norwalk/20019/2009/VNM capsid protein VP1 (gene: VP1)	4/36	0.00494082	0.0308916	0	0	5.75705	30.5712	ITGA4;STAT1;CD8A;BRCA1
Norovirus Hu/Norwalk/20067/2009/VNM capsid protein VP1 (gene: VP1)	4/36	0.00494082	0.0308629	0	0	5.75705	30.5712	ITGA4;STAT1;CD8A;BRCA1
Norovirus Hu/Norwalk/20069/2009/VNM capsid protein VP1 (gene: VP1)	4/36	0.00494082	0.0308342	0	0	5.75705	30.5712	ITGA4;STAT1;CD8A;BRCA1
Norovirus Hu/Norwalk/20092/2009/VNM capsid protein VP1 (gene: VP1)	4/36	0.00494082	0.0308056	0	0	5.75705	30.5712	ITGA4;STAT1;CD8A;BRCA1
Norovirus Hu/Norwalk/20093/2009/VNM capsid protein VP1 (gene: VP1)	4/36	0.00494082	0.030777	0	0	5.75705	30.5712	ITGA4;STAT1;CD8A;BRCA1
Norovirus Hu/Norwalk/20118/2009/VNM capsid protein VP1 (gene: VP1)	4/36	0.00494082	0.0307485	0	0	5.75705	30.5712	ITGA4;STAT1;CD8A;BRCA1
Norovirus Hu/Norwalk/20122/2009/VNM capsid protein VP1 (gene: VP1)	4/36	0.00494082	0.03072	0	0	5.75705	30.5712	ITGA4;STAT1;CD8A;BRCA1
Norovirus Hu/Norwalk/20128/2009/VNM capsid protein VP1 (gene: VP1)	4/36	0.00494082	0.0306916	0	0	5.75705	30.5712	ITGA4;STAT1;CD8A;BRCA1
Norovirus Hu/Norwalk/20135/2009/VNM capsid protein VP1 (gene: VP1)	4/36	0.00494082	0.0306632	0	0	5.75705	30.5712	ITGA4;STAT1;CD8A;BRCA1
Norovirus Hu/Norwalk/20139/2009/VNM capsid protein VP1 (gene: VP1)	4/36	0.00494082	0.0306349	0	0	5.75705	30.5712	ITGA4;STAT1;CD8A;BRCA1
Norovirus Hu/Norwalk/20140/2009/VNM capsid protein VP1 (gene: VP1)	4/36	0.00494082	0.0306066	0	0	5.75705	30.5712	ITGA4;STAT1;CD8A;BRCA1
Norovirus Hu/Norwalk/20142/2009/VNM capsid protein VP1 (gene: VP1)	4/36	0.00494082	0.0305784	0	0	5.75705	30.5712	ITGA4;STAT1;CD8A;BRCA1
Rotavirus C outer capsid protein (gene: VP7)	4/36	0.00494082	0.0305503	0	0	5.75705	30.5712	CD8A;BRCA1;THY1;ICOS
Vaccinia virus secreted complement-binding protein (gene: C3L)	4/36	0.00494082	0.0305222	0	0	5.75705	30.5712	ITGA4;STAT1;CD8A;BRCA1
Vaccinia virus Ankara Complement control protein	4/36	0.00494082	0.0304941	0	0	5.75705	30.5712	ITGA4;STAT1;CD8A;BRCA1
Variola virus hypothetical protein (gene: F9R)	4/36	0.00494082	0.0304661	0	0	5.75705	30.5712	STAT1;CD8A;UBD;BRCA1
Molluscum contagiosum virus subtype 1 MC143R (gene: MC143R)	8/136	0.00495177	0.0305056	0	0	3.04785	16.178	KLRK1;CD72;ITGA4;CD8A;KLRC3;STAT1;KLRC1;CLEC4E
Hepatitis C virus subtype 1g full_polyprotein 1..3015	6/82	0.00507731	0.0312504	0	0	3.79123	20.029	ITGA4;STAT1;UBD;BRCA1;HIST2H2AC;HIST1H2AB
Human betacoronavirus 2c England-Qatar/2012 ORF1ab	6/82	0.00507731	0.0312217	0	0	3.79123	20.029	ITGA4;CD8A;STAT1;UBD;ISG15;BRCA1
Human respirovirus 3 phosphoprotein	6/82	0.00507731	0.0311932	0	0	3.79123	20.029	CD8A;STAT1;UBD;BRCA1;HIST2H2AC;HIST1H2AB
Human adenovirus 41 IVa2	5/58	0.00517185	0.031745	0	0	4.46668	23.5149	STAT1;UBD;TAP1;BRCA1;TK1
Human adenovirus 71 E3 immune modulating protein (gene: E3)	5/58	0.00517185	0.031716	0	0	4.46668	23.5149	ITGA4;CD8A;STAT1;BRCA1;IL18BP
Human papillomavirus 167 E2 (gene: E2)	5/58	0.00517185	0.031687	0	0	4.46668	23.5149	ITGA4;CD8A;STAT1;UBD;BRCA1
Modoc virus envelope protein	5/58	0.00517185	0.0316581	0	0	4.46668	23.5149	ITGA4;CD8A;STAT1;UBD;BRCA1
Norovirus Hu/GII-4/CGMH10/2006/TW major viral capsid protein (gene: VP1)	5/58	0.00517185	0.0316293	0	0	4.46668	23.5149	ITGA4;CD8A;STAT1;UBD;BRCA1
Norovirus Hu/GII-4/CGMH22/2010/TW major viral capsid protein (gene: VP1)	5/58	0.00517185	0.0316005	0	0	4.46668	23.5149	ITGA4;CD8A;STAT1;UBD;BRCA1
Norovirus Hu/GII.4/Miranda/NSW850K/2011/AU VP1	5/58	0.00517185	0.0315718	0	0	4.46668	23.5149	ITGA4;CD8A;STAT1;UBD;BRCA1
Norovirus Hu/Norwalk/20033/2009/VNM capsid protein VP1 (gene: VP1)	5/58	0.00517185	0.0315431	0	0	4.46668	23.5149	ITGA4;CD8A;STAT1;UBD;BRCA1
Cyclovirus PK5222 capsid protein (gene: cap)	2/6	0.00529379	0.0322575	0	0	17.2712	90.5219	STAT1;BRCA1
Echovirus E12 polyprotein region 5	2/6	0.00529379	0.0322283	0	0	17.2712	90.5219	CD8A;STAT1
Ectromelia virus ERPV interleukin 18 binding protein	2/6	0.00529379	0.0321991	0	0	17.2712	90.5219	STAT1;BRCA1
Horsepox virus HSPV019 (Orthopoxvirus interleukin 18 binding protein)	2/6	0.00529379	0.03217	0	0	17.2712	90.5219	STAT1;BRCA1
Human alphaherpesvirus 1 nuclear egress membrane protein (gene: UL34)	2/6	0.00529379	0.0321409	0	0	17.2712	90.5219	ITGA4;STAT1
Human papillomavirus 134 E6 (gene: E6)	2/6	0.00529379	0.0321119	0	0	17.2712	90.5219	STAT1;BRCA1
Human papillomavirus 142 transforming protein (gene: E6)	2/6	0.00529379	0.0320829	0	0	17.2712	90.5219	STAT1;BRCA1
Human papillomavirus 15 early protein (gene: E6)	2/6	0.00529379	0.0320539	0	0	17.2712	90.5219	STAT1;BRCA1
Human papillomavirus 65 E6	2/6	0.00529379	0.0320251	0	0	17.2712	90.5219	STAT1;BRCA1
Human papillomavirus type 13 E6 (gene: E6)	2/6	0.00529379	0.0319962	0	0	17.2712	90.5219	STAT1;BRCA1
Human papillomavirus type 50 transforming protein E6 (gene: E6)	2/6	0.00529379	0.0319675	0	0	17.2712	90.5219	STAT1;BRCA1
Human rhinovirus A1 3C	2/6	0.00529379	0.0319387	0	0	17.2712	90.5219	ITGA4;STAT1
Human rhinovirus A100 3C	2/6	0.00529379	0.0319101	0	0	17.2712	90.5219	ITGA4;STAT1
Human rhinovirus A13 3C	2/6	0.00529379	0.0318815	0	0	17.2712	90.5219	ITGA4;STAT1
Human rhinovirus A19 3C	2/6	0.00529379	0.0318529	0	0	17.2712	90.5219	ITGA4;STAT1
Human rhinovirus A30 3C	2/6	0.00529379	0.0318244	0	0	17.2712	90.5219	ITGA4;STAT1
Human rhinovirus A32 3C	2/6	0.00529379	0.0317959	0	0	17.2712	90.5219	ITGA4;STAT1
Human rhinovirus A34 3C	2/6	0.00529379	0.0317675	0	0	17.2712	90.5219	ITGA4;STAT1
Human rhinovirus A36 3C (P3-C)	2/6	0.00529379	0.0317391	0	0	17.2712	90.5219	ITGA4;STAT1
Human rhinovirus A36 2A (P2-A)	2/6	0.00529379	0.0317108	0	0	17.2712	90.5219	STAT1;BRCA1
Human rhinovirus A41 3C (P3-C)	2/6	0.00529379	0.0316825	0	0	17.2712	90.5219	ITGA4;STAT1
Human rhinovirus A43 3C	2/6	0.00529379	0.0316543	0	0	17.2712	90.5219	ITGA4;STAT1
Human rhinovirus A46 3C (P3-C)	2/6	0.00529379	0.0316262	0	0	17.2712	90.5219	ITGA4;STAT1
Human rhinovirus A50 3C	2/6	0.00529379	0.0315981	0	0	17.2712	90.5219	ITGA4;STAT1
Human rhinovirus A51 2A	2/6	0.00529379	0.03157	0	0	17.2712	90.5219	STAT1;BRCA1
Human rhinovirus A58 3C	2/6	0.00529379	0.031542	0	0	17.2712	90.5219	ITGA4;STAT1
Human rhinovirus A58 2A	2/6	0.00529379	0.031514	0	0	17.2712	90.5219	STAT1;BRCA1
Human rhinovirus A60 3C	2/6	0.00529379	0.0314861	0	0	17.2712	90.5219	ITGA4;STAT1
Human rhinovirus A61 3C	2/6	0.00529379	0.0314582	0	0	17.2712	90.5219	ITGA4;STAT1
Human rhinovirus A64 3C	2/6	0.00529379	0.0314304	0	0	17.2712	90.5219	ITGA4;STAT1
Human rhinovirus A65 2A	2/6	0.00529379	0.0314027	0	0	17.2712	90.5219	STAT1;BRCA1
Human rhinovirus A67 3C	2/6	0.00529379	0.0313749	0	0	17.2712	90.5219	ITGA4;STAT1
Human rhinovirus A7 3C	2/6	0.00529379	0.0313473	0	0	17.2712	90.5219	ITGA4;STAT1
Human rhinovirus A73 3C (P3-C)	2/6	0.00529379	0.0313197	0	0	17.2712	90.5219	ITGA4;STAT1
Human rhinovirus A74 3C (P3-C)	2/6	0.00529379	0.0312921	0	0	17.2712	90.5219	ITGA4;STAT1
Human rhinovirus A75 3C (P3-C)	2/6	0.00529379	0.0312646	0	0	17.2712	90.5219	ITGA4;STAT1
Human rhinovirus A8 3C	2/6	0.00529379	0.0312371	0	0	17.2712	90.5219	ITGA4;STAT1
Human rhinovirus A88 3C (P3-C)	2/6	0.00529379	0.0312097	0	0	17.2712	90.5219	ITGA4;STAT1
Human rhinovirus A89 3C	2/6	0.00529379	0.0311823	0	0	17.2712	90.5219	ITGA4;STAT1
Human rhinovirus A89 2A	2/6	0.00529379	0.031155	0	0	17.2712	90.5219	STAT1;BRCA1
Human rhinovirus A9 3C	2/6	0.00529379	0.0311277	0	0	17.2712	90.5219	ITGA4;STAT1
Human rhinovirus A95 3C	2/6	0.00529379	0.0311005	0	0	17.2712	90.5219	ITGA4;STAT1
Human rhinovirus B27 3C	2/6	0.00529379	0.0310733	0	0	17.2712	90.5219	ITGA4;STAT1
Rhinovirus A protease 3C	2/6	0.00529379	0.0310461	0	0	17.2712	90.5219	ITGA4;STAT1
Rhinovirus A98 3C	2/6	0.00529379	0.031019	0	0	17.2712	90.5219	ITGA4;STAT1
Rotavirus C outer capsid spike protein (gene: VP4)	2/6	0.00529379	0.030992	0	0	17.2712	90.5219	STAT1;BRCA1
Vaccinia virus Ankara serine proteinase inhibitor / SPI-2 f1	2/6	0.00529379	0.030965	0	0	17.2712	90.5219	STAT1;BRCA1
Macacine alphaherpesvirus 1 large tegument protein (gene: UL36)	6/83	0.00538614	0.0314778	0	0	3.74555	19.5665	ITGA4;UHRF1;STAT1;UBD;ISG15;BRCA1
Human coronavirus NL63 full_polyprotein 1..6729	8/138	0.0054015	0.0315401	0	0	3.00368	15.6824	ITGA4;CD8A;UHRF1;STAT1;UBD;ISG15;BRCA1;TK1
Cercopithecine betaherpesvirus 5 tegument protein pp71 (gene: UL82)	4/37	0.00545678	0.0318352	0	0	5.60146	29.1886	ITGA4;STAT1;CD8A;BRCA1
Hepatitis C virus subtype 1b E1 protein	4/37	0.00545678	0.0318075	0	0	5.60146	29.1886	ITGA4;STAT1;CD8A;BRCA1
Horsepox virus HSPV061 (RNA polymerase subunit; Provisional)	4/37	0.00545678	0.03178	0	0	5.60146	29.1886	ITGA4;STAT1;CD8A;BRCA1
Human betaherpesvirus 5 tegument protein pp71 (gene: UL82)	4/37	0.00545678	0.0317524	0	0	5.60146	29.1886	ITGA4;STAT1;CD8A;BRCA1
Human gammaherpesvirus 4 putative nmembrane antigen p140 (gene: BNRF1)	4/37	0.00545678	0.0317249	0	0	5.60146	29.1886	ITGA4;STAT1;UBD;BRCA1
Human papillomavirus 109 E7 protein (gene: E7)	4/37	0.00545678	0.0316975	0	0	5.60146	29.1886	STAT1;CD8A;UBD;BRCA1
Human papillomavirus type 144 replication protein (gene: E1)	4/37	0.00545678	0.0316701	0	0	5.60146	29.1886	STAT1;UBD;BRCA1;TK1
Human rhinovirus B84 1D	4/37	0.00545678	0.0316427	0	0	5.60146	29.1886	STAT1;CD8A;BRCA1;ICOS
Cercopithecine alphaherpesvirus 2 ribonucleotide reductase subunit 2 (gene: UL40)	3/19	0.00549353	0.0318284	0	0	8.18107	42.5758	RRM2;STAT1;BRCA1
Cowpox virus CPXV092 protein (gene: CPXV092 CDS)	3/19	0.00549353	0.0318009	0	0	8.18107	42.5758	STAT1;EXO1;BRCA1
Ebola virus - Mayinga, Zaire, 1976 polymerase (gene: L)	3/19	0.00549353	0.0317735	0	0	8.18107	42.5758	STAT1;CD8A;BRCA1
Horsepox virus HSPV056 (Poxvirus F16 protein)	3/19	0.00549353	0.0317462	0	0	8.18107	42.5758	ITGA4;STAT1;BRCA1
Human adenovirus 1 pVI	3/19	0.00549353	0.0317189	0	0	8.18107	42.5758	STAT1;UBD;BRCA1
Human adenovirus 18 protease protein (gene: L3)	3/19	0.00549353	0.0316916	0	0	8.18107	42.5758	STAT1;UBD;BRCA1
Human adenovirus 41 E4 hypothetical protein 3	3/19	0.00549353	0.0316644	0	0	8.18107	42.5758	STAT1;UBD;BRCA1
Human adenovirus 5 pVI	3/19	0.00549353	0.0316373	0	0	8.18107	42.5758	STAT1;UBD;BRCA1
Human adenovirus 6 minor capsid protein precursor pVI (gene: L3)	3/19	0.00549353	0.0316102	0	0	8.18107	42.5758	STAT1;UBD;BRCA1
Human adenovirus 66 19.3 kDa MHC class I antigen-binding glycoprotein precursor (gene: E3)	3/19	0.00549353	0.0315831	0	0	8.18107	42.5758	ITGA4;STAT1;CD8A
Human astrovirus BF34 ORF1a	3/19	0.00549353	0.0315561	0	0	8.18107	42.5758	STAT1;CD8A;BRCA1
Human betaherpesvirus 5 membrane protein US21 (gene: US21)	3/19	0.00549353	0.0315291	0	0	8.18107	42.5758	STAT1;UBD;BRCA1
Human coronavirus OC43 nsp6 (gene: orf1ab)	3/19	0.00549353	0.0315022	0	0	8.18107	42.5758	STAT1;CD8A;UBD
Human enterovirus C104 2C	3/19	0.00549353	0.0314753	0	0	8.18107	42.5758	STAT1;BRCA1;TK1
Human gammaherpesvirus 4 envelope glycoprotein gp350 (gene: BLLF1)	3/19	0.00549353	0.0314485	0	0	8.18107	42.5758	STAT1;CD8A;BRCA1
Human gammaherpesvirus 8 ORF70 (gene: ORF70)	3/19	0.00549353	0.0314217	0	0	8.18107	42.5758	STAT1;BRCA1;TYMS
Human papillomavirus 65 E7	3/19	0.00549353	0.0313949	0	0	8.18107	42.5758	ITGA4;UBD;BRCA1
Human rhinovirus A55 2C (P2-C)	3/19	0.00549353	0.0313682	0	0	8.18107	42.5758	STAT1;BRCA1;TK1
Human rhinovirus A58 2C	3/19	0.00549353	0.0313416	0	0	8.18107	42.5758	STAT1;BRCA1;TK1
Human rhinovirus B3 2C (P2-C)	3/19	0.00549353	0.031315	0	0	8.18107	42.5758	STAT1;BRCA1;TK1
Human rhinovirus B72 2C	3/19	0.00549353	0.0312884	0	0	8.18107	42.5758	STAT1;BRCA1;TK1
Human rhinovirus QCE VP1	3/19	0.00549353	0.0312619	0	0	8.18107	42.5758	STAT1;CD8A;BRCA1
Influenza A virus (A/Hong Kong/1073/99(H9N2)) nonstructural protein 1 (gene: NS1)	3/19	0.00549353	0.0312354	0	0	8.18107	42.5758	ITGA4;STAT1;BRCA1
Measles virus genotype D4 hemagglutinin protein (gene: H)	3/19	0.00549353	0.031209	0	0	8.18107	42.5758	CD96;SLAMF8;CD48
Measles virus genotype D8 hemagglutinin (gene: H)	3/19	0.00549353	0.0311826	0	0	8.18107	42.5758	CD96;SLAMF8;CD48
Measles virus strain MVi/New York.USA/26.09/3 hemagglutinin protein (gene: H)	3/19	0.00549353	0.0311563	0	0	8.18107	42.5758	CD96;SLAMF8;CD48
Measles virus strain MVi/Texas.USA/4.07 hemagglutinin protein (gene: H)	3/19	0.00549353	0.03113	0	0	8.18107	42.5758	CD96;SLAMF8;CD48
Monkeypox virus Zaire-96-I-16 A34L (gene: A34L)	3/19	0.00549353	0.0311038	0	0	8.18107	42.5758	STAT1;BRCA1;TK1
Norovirus Hu/GIV.1/CCDC GR1113-59/CHN/2011 major capsid protein	3/19	0.00549353	0.0310776	0	0	8.18107	42.5758	ITGA4;STAT1;BRCA1
Sosuga virus V protein	3/19	0.00549353	0.0310514	0	0	8.18107	42.5758	STAT1;CD8A;BRCA1
Vaccinia virus hypothetical protein (gene: F16L)	3/19	0.00549353	0.0310253	0	0	8.18107	42.5758	ITGA4;STAT1;BRCA1
Vaccinia virus Ankara 26.5k hypothetical protein	3/19	0.00549353	0.0309992	0	0	8.18107	42.5758	ITGA4;STAT1;BRCA1
Venezuelan equine encephalitis virus core protein (gene: 26S mRNA)	3/19	0.00549353	0.0309732	0	0	8.18107	42.5758	ITGA4;STAT1;BRCA1
Yaba-like disease virus 121L protin (gene: 121L)	3/19	0.00549353	0.0309472	0	0	8.18107	42.5758	ITGA4;STAT1;TK1
Zaire ebolavirus RNA-dependent RNA polymerase (gene: L)	3/19	0.00549353	0.0309213	0	0	8.18107	42.5758	STAT1;CD8A;BRCA1
West Nile virus lineage 2 excised_polyprotein 1..791 (gene: flavivirus polyprotein)	7/110	0.00549385	0.0308971	0	0	3.29722	17.1592	ITGA4;CD8A;STAT1;UBD;TAP1;THY1;BRCA1
Enterovirus D 3D-POL	5/59	0.0055632	0.031261	0	0	4.39097	22.7961	CD8A;UBD;BRCA1;HIST2H2AC;HIST1H2AB
Human papillomavirus 100 E7 protein (gene: E7)	5/59	0.0055632	0.0312348	0	0	4.39097	22.7961	ITGA4;CD8A;STAT1;UBD;BRCA1
Human papillomavirus 111 E2 protein (gene: E2)	5/59	0.0055632	0.0312087	0	0	4.39097	22.7961	ITGA4;CD8A;STAT1;UBD;BRCA1
Monkeypox virus Zaire-96-I-16 DNA polymerase (gene: F8L)	5/59	0.0055632	0.0311827	0	0	4.39097	22.7961	ITGA4;CD8A;STAT1;UBD;BRCA1
Norovirus Hu/GII-4/CGMH18/2008/TW major viral capsid protein (gene: VP1)	5/59	0.0055632	0.0311567	0	0	4.39097	22.7961	ITGA4;CD8A;STAT1;UBD;BRCA1
Norovirus Hu/GII-4/CGMH28/2010/TW major viral capsid protein (gene: VP1)	5/59	0.0055632	0.0311307	0	0	4.39097	22.7961	ITGA4;CD8A;STAT1;UBD;BRCA1
Human adenovirus 11a IVa2	6/84	0.0057085	0.0319172	0	0	3.70096	19.1184	STAT1;UBD;TAP1;ISG15;BRCA1;TK1
Vaccinia virus Ankara Interleukin-1 beta receptor	9/170	0.00587576	0.0328251	0	0	2.74307	14.0909	ITGA4;CD8A;STAT1;UBD;CRTAM;TCAP;SLAMF6;BRCA1;LILRB4
Echovirus E6 3D	5/60	0.00597498	0.0333516	0	0	4.31779	22.1078	CD8A;UBD;BRCA1;HIST2H2AC;HIST1H2AB
Hepatitis C virus subtype 2c full_polyprotein 1..3033	5/60	0.00597498	0.0333239	0	0	4.31779	22.1078	ITGA4;CD8A;STAT1;UBD;BRCA1
Human adenovirus 61 pIVa2	5/60	0.00597498	0.0332963	0	0	4.31779	22.1078	STAT1;UBD;TAP1;BRCA1;TK1
Human adenovirus B3 protein IVa2 (gene: IVa2)	5/60	0.00597498	0.0332687	0	0	4.31779	22.1078	STAT1;UBD;TAP1;BRCA1;TK1
Human alphaherpesvirus 1 envelope glycoprotein D (gene: US6)	5/60	0.00597498	0.0332411	0	0	4.31779	22.1078	ITGA4;CD8A;STAT1;CD48;SLAMF6
Variola virus hypothetical protein (gene: F8L)	5/60	0.00597498	0.0332136	0	0	4.31779	22.1078	CD96;CD8A;THY1;PDCD1;ICOS
Coxsackievirus A8 VP1 protein	4/38	0.00600753	0.0333669	0	0	5.45405	27.8961	STAT1;CD8A;UBD;BRCA1
Eastern equine encephalitis virus precursor of structural proteins	4/38	0.00600753	0.0333393	0	0	5.45405	27.8961	ITGA4;STAT1;CD8A;BRCA1
Echovirus E21 2C	4/38	0.00600753	0.0333118	0	0	5.45405	27.8961	STAT1;UBD;BRCA1;TK1
Echovirus E24 VP3	4/38	0.00600753	0.0332843	0	0	5.45405	27.8961	ITGA4;STAT1;CD8A;BRCA1
Human adenovirus 58 ORF1 (gene: E4)	4/38	0.00600753	0.0332568	0	0	5.45405	27.8961	ITGA4;STAT1;CD8A;BRCA1
Human adenovirus 63 Orf 1 protein (gene: E4)	4/38	0.00600753	0.0332294	0	0	5.45405	27.8961	ITGA4;STAT1;CD8A;BRCA1
Human immunodeficiency virus 1 Envelope surface glycoprotein gp120 (gene: env)	4/38	0.00600753	0.0332021	0	0	5.45405	27.8961	CD96;SLAMF6;CD48;ICOS
Human papillomavirus type 40 early protein (gene: E7)	4/38	0.00600753	0.0331748	0	0	5.45405	27.8961	ITGA4;CD8A;UBD;BRCA1
Human rhinovirus B52 1D	4/38	0.00600753	0.0331475	0	0	5.45405	27.8961	STAT1;CD8A;BRCA1;ICOS
Influenza A virus (A/goose/Guangdong/1/1996(H5N1)) HA1 (gene: HA)	4/38	0.00600753	0.0331203	0	0	5.45405	27.8961	CD96;CD8A;CD226;ICOS
Rotavirus A VP7 (gene: VP7)	4/38	0.00600753	0.0330931	0	0	5.45405	27.8961	CD8A;BRCA1;THY1;ICOS
Sindbis virus hypothetical protein	4/38	0.00600753	0.033066	0	0	5.45405	27.8961	ITGA4;STAT1;CD8A;BRCA1
Western equine encephalitis virus excised_polyprotein 1..742	4/38	0.00600753	0.0330389	0	0	5.45405	27.8961	ITGA4;STAT1;CD8A;BRCA1
African green monkey simian foamy virus Gag (gene: gag)	3/20	0.00637156	0.0350123	0	0	7.77202	39.2946	ITGA4;STAT1;BRCA1
Astrovirus MLB1 HK05 ORF1a (gene: ORF1a)	3/20	0.00637156	0.0349837	0	0	7.77202	39.2946	ITGA4;STAT1;BRCA1
Astrovirus MLB2 putative serine protease	3/20	0.00637156	0.0349551	0	0	7.77202	39.2946	ITGA4;STAT1;BRCA1
Cercopithecine betaherpesvirus 5 membrane protein US18 (gene: US18)	3/20	0.00637156	0.0349266	0	0	7.77202	39.2946	STAT1;UBD;BRCA1
Cowpox virus CPXV091 protein (gene: CPXV091 CDS)	3/20	0.00637156	0.0348981	0	0	7.77202	39.2946	STAT1;UBD;BRCA1
Dengue virus 2 nonstructural protein NS3 (gene: flavivirus polyprotein)	3/20	0.00637156	0.0348696	0	0	7.77202	39.2946	ITGA4;STAT1;BRCA1
Eastern equine encephalitis virus p123 protein	3/20	0.00637156	0.0348412	0	0	7.77202	39.2946	ITGA4;UBD;BRCA1
Ectromelia virus ERPV thymidine kinase	3/20	0.00637156	0.0348129	0	0	7.77202	39.2946	STAT1;BRCA1;TK1
Ectromelia virus ERPV virokine/NFKb inhibitor	3/20	0.00637156	0.0347846	0	0	7.77202	39.2946	TOP2A;STAT1;BRCA1
Ectromelia virus ERPV glutaredoxin 2	3/20	0.00637156	0.0347563	0	0	7.77202	39.2946	STAT1;UBD;BRCA1
Enterovirus H Picornain 3C	3/20	0.00637156	0.0347281	0	0	7.77202	39.2946	STAT1;CD8A;BRCA1
Horsepox virus HSPV009 (Hypothetical protein)	3/20	0.00637156	0.0347	0	0	7.77202	39.2946	STAT1;CCL5;BRCA1
Human adenovirus 19 ORF3 (gene: E4)	3/20	0.00637156	0.0346718	0	0	7.77202	39.2946	STAT1;CD8A;UBD
Human adenovirus 2 pVI	3/20	0.00637156	0.0346438	0	0	7.77202	39.2946	STAT1;UBD;BRCA1
Human astrovirus 2 capsid protein precursor	3/20	0.00637156	0.0346157	0	0	7.77202	39.2946	ITGA4;STAT1;BRCA1
[truncated: 4,098 more rows]
